# Supplementary material for: Genomic insights into multidrug-resistance, mating and virulence in Candida auris and related emerging species
Source: PubMed Central journal article supplement (PMC6297351; doi:10.1038/s41467-018-07779-6), 2018-12-17
Supplement: 41467_2018_7779_MOESM1_ESM.pdf [file 41467_2018_7779_MOESM1_ESM.pdf]

## **Genomic insights into multidrug-resistance, mating, and virulence in *Candida auris* and related emerging species**

José F. Muñoz<sup>1</sup>, Lalitha Gade<sup>2</sup>, Nancy A. Chow<sup>2</sup>, Vladimir N. Loparev<sup>3</sup>, Phalasy Juieng<sup>3</sup>, Elizabeth L. Berkow<sup>2</sup>, Rhys A. Farrer<sup>1</sup>, Anastasia P. Litvintseva<sup>2\*</sup>, Christina A. Cuomo<sup>1\*</sup>

<sup>1</sup> Broad Institute of MIT and Harvard, Cambridge, MA USA. <sup>2</sup> Mycotic Diseases Branch, Centers for Disease Control and Prevention, Atlanta, GA USA. <sup>3</sup> Biotechnology Core Facility Branch, Centers for Disease Control and Prevention, Atlanta, GA USA.

\*Corresponding authors: Christina A. Cuomo [cuomo@broadinstitute.org](mailto:cuomo@broadinstitute.org); Anastasia P. Litvintseva, [frq8@cdc.gov](mailto:frq8@cdc.gov)

# SUPPLEMENTARY FIGURES

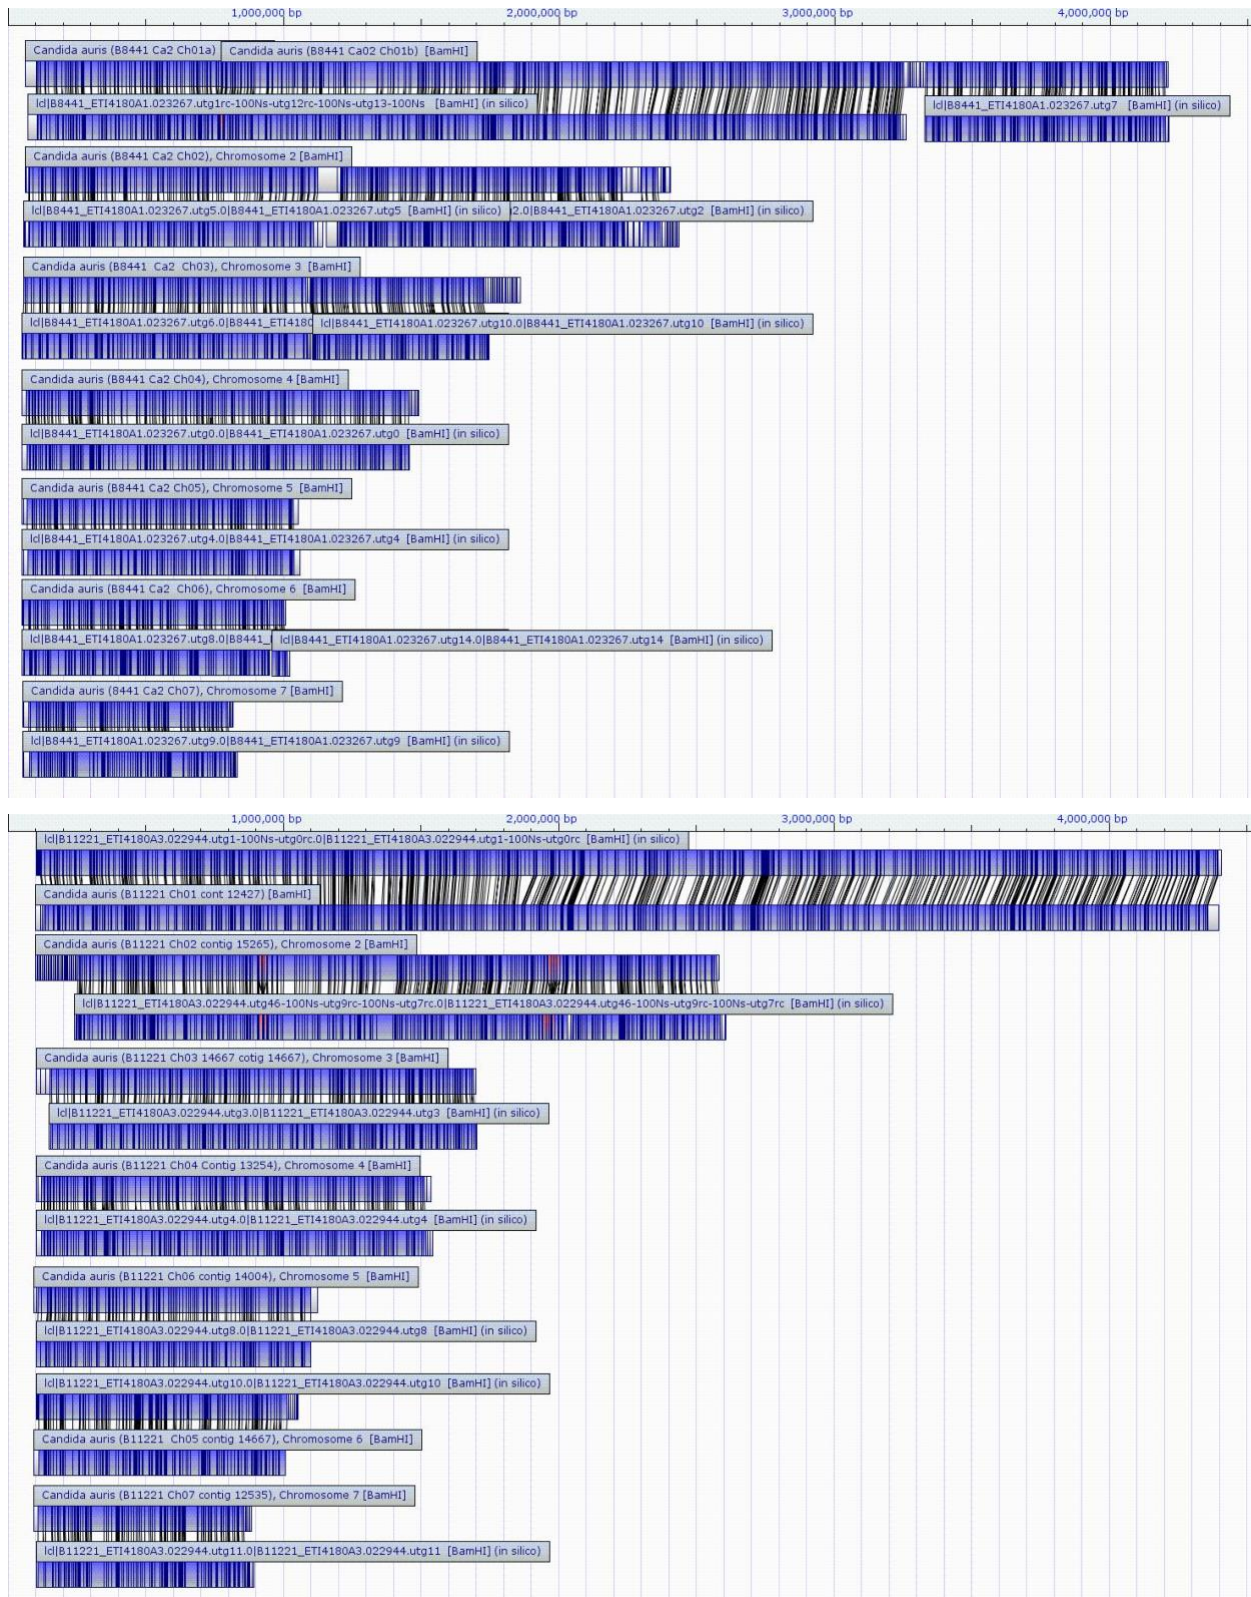

**Supplementary Figure 1.** Optical map of *Candida auris* strains B8441 (top) and B11221 (bottom).

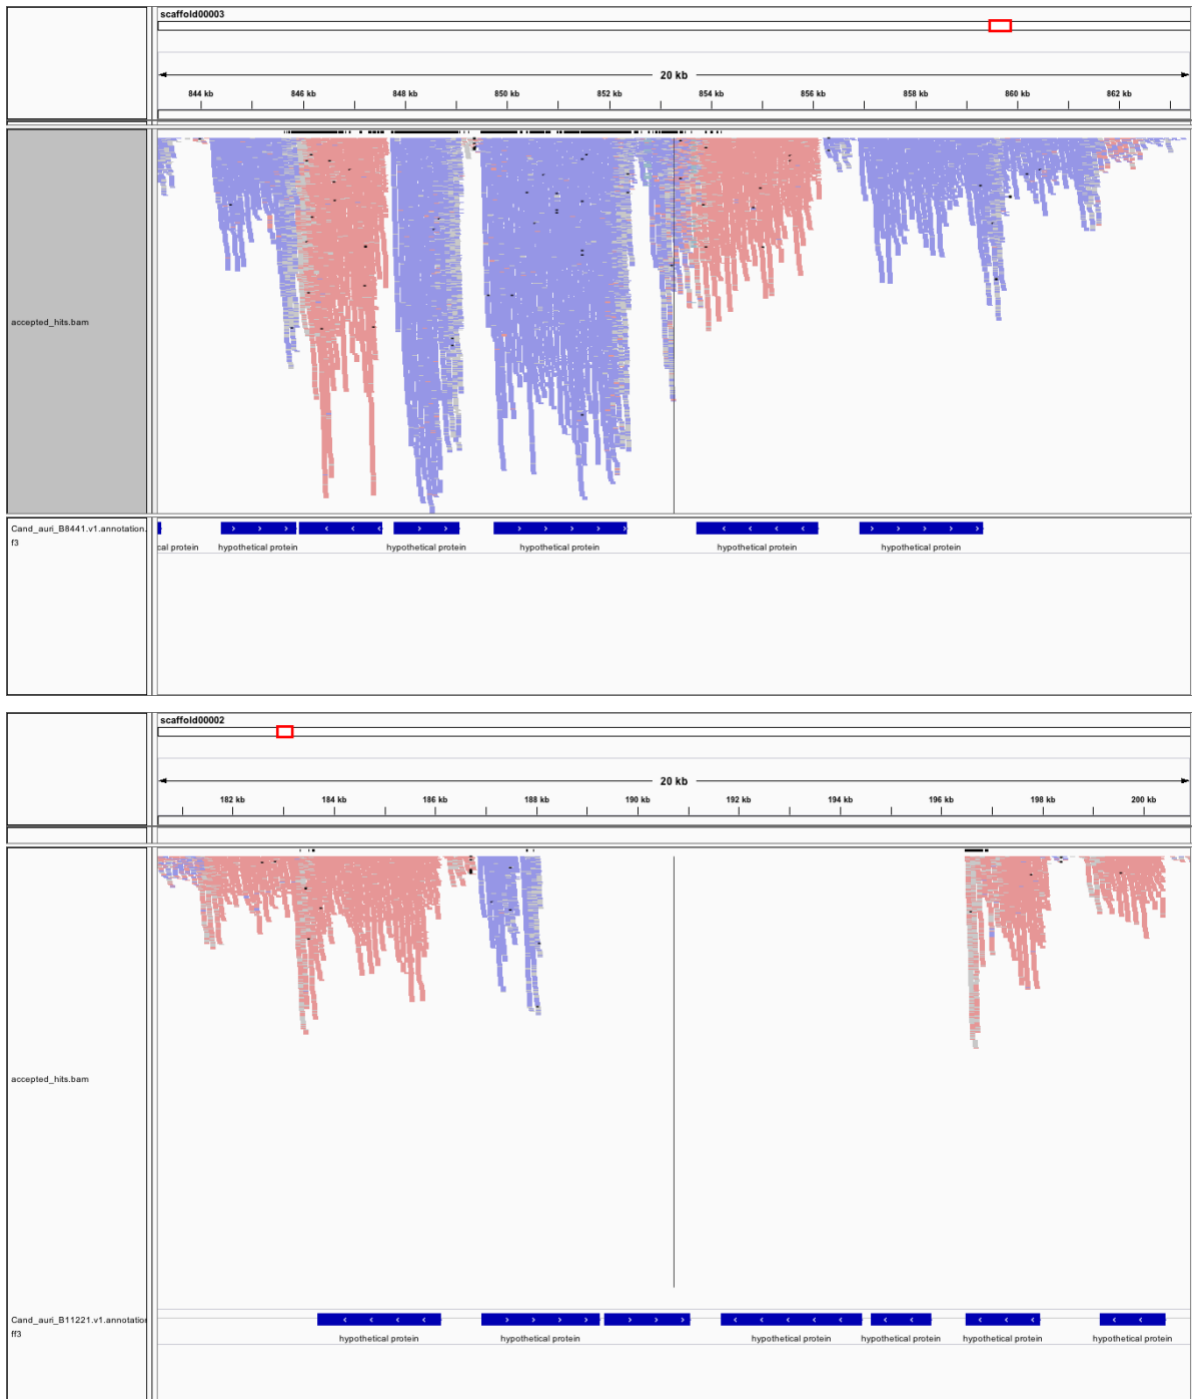

**Supplementary Figure 2.** RNA-Seq data mapping to the mating type locus. Integrative Genomics Viewer (IGV) snapshots of RNA-Seq Illumina data from *C. auris* strain B8441 (clade I; *MTLa*) aligned to the annotated genome assembly of *C. auris* B8441 *MTLa* (top) or to the annotated genome assembly of *C. auris* strain B11221 *MTL $\alpha$*  (bottom).

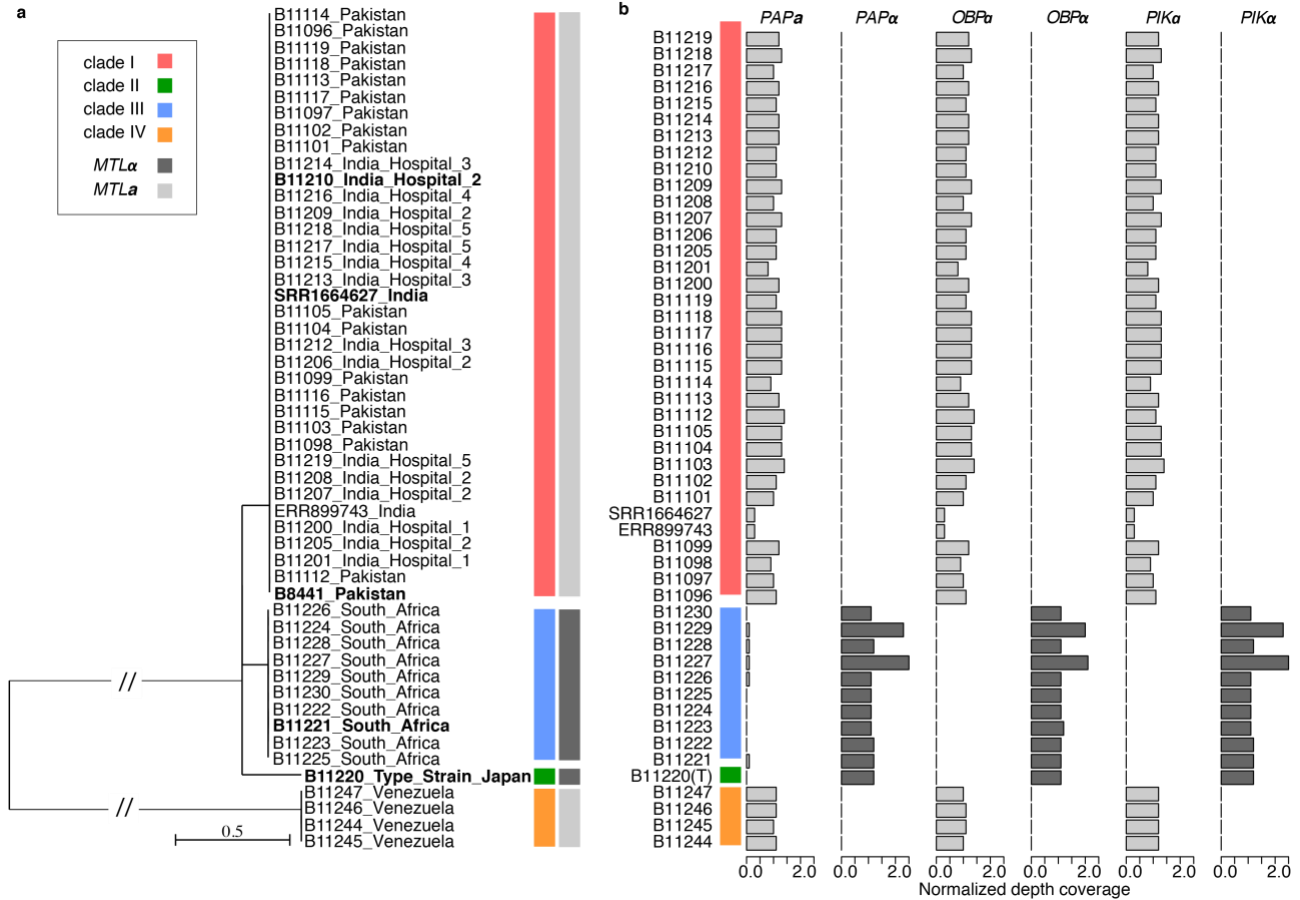

**Supplementary Figure 3.** Mating-type locus for sexual reproduction in *C. auris*. **(a)** Phylogenetic tree of *C. auris* isolates from Lockhart et al. 2016. Isolates are color code according the clades (I, II, III and IV) and mating type (*MTLa* and *MTL $\alpha$* ). **(b)** The normalized depth read coverage of mapped positions for all sequenced *C. auris* isolates from Lockhart et al. (2016) mapped to B8441 (*MTLa*) and B11221 (*MTL $\alpha$* ) were computed for each specific *MTL* linked gene -*OPBa*, *PIK $\alpha$* , and *PAPa*- and *OPB $\alpha$* , *PIK $\alpha$* , and *PAP $\alpha$* -, respectively. Branch lengths indicate the mean number of changes per site.

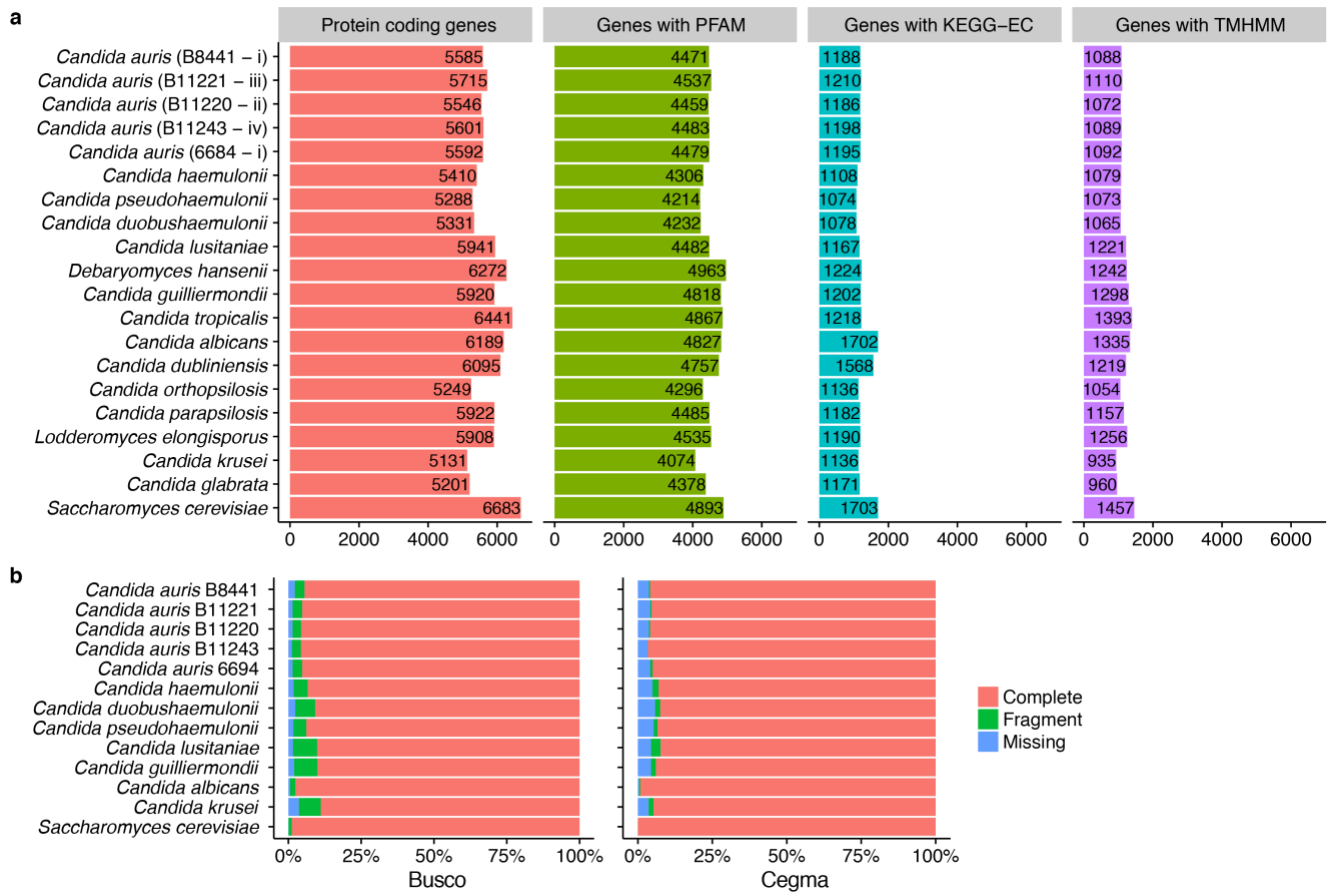

**Supplementary Figure 4.** Overall description and comparison of the annotated genome assemblies included in this study. **(a)** Bar plot depicts number of protein-coding genes, and functional annotation (protein family domain PFAM; pathways KEGG-EC; transmembrane domain TMHMM). **(b)** Conservation of core eukaryotic genes (CEGs) using BUSCO and CEGMA across the genomes of *Candida auris* strains B8441, B11221, 6694, B11220, B11243, *C. haemulonii* (B11899), *C. pseudohaemulonii* (B12108), *C. duobushaemulonii* (B09383), and other genomes of closely related Saccharomycetales species included in comparative genomic analyses. Roman numerals indicate the corresponding clade for *C. auris* isolates.

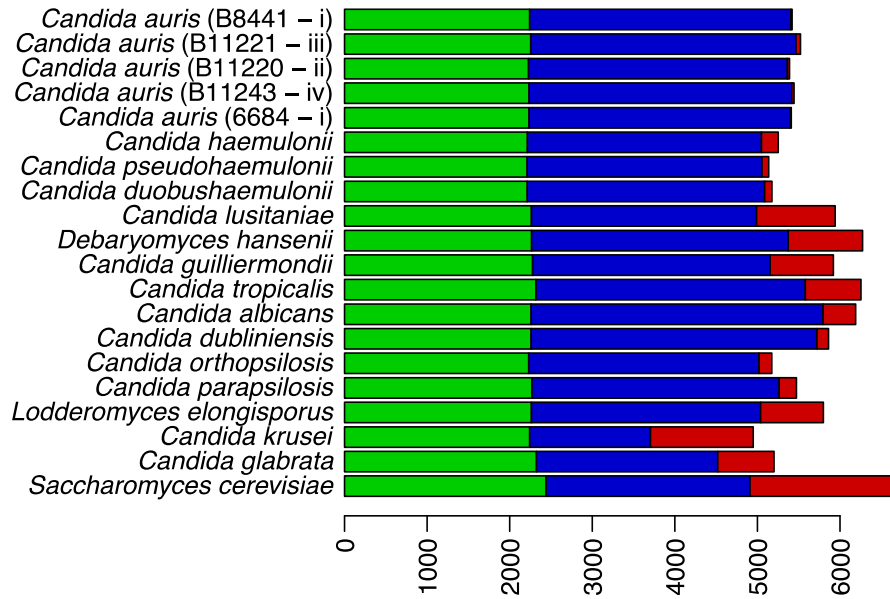

**Supplementary Figure 5.** Distribution of ortholog clusters between *Candida auris*, and closely related pathogenic and non-pathogenic species from the order Saccharomycetales. A bar plot of orthology classes is shown, where core genes found in all genomes are shown in green, shared genes present in more than one but not all genomes in blue, and genes that were unique to only one of the 20 genomes in red. Roman numerals indicate the corresponding clade for *C. auris* isolates.

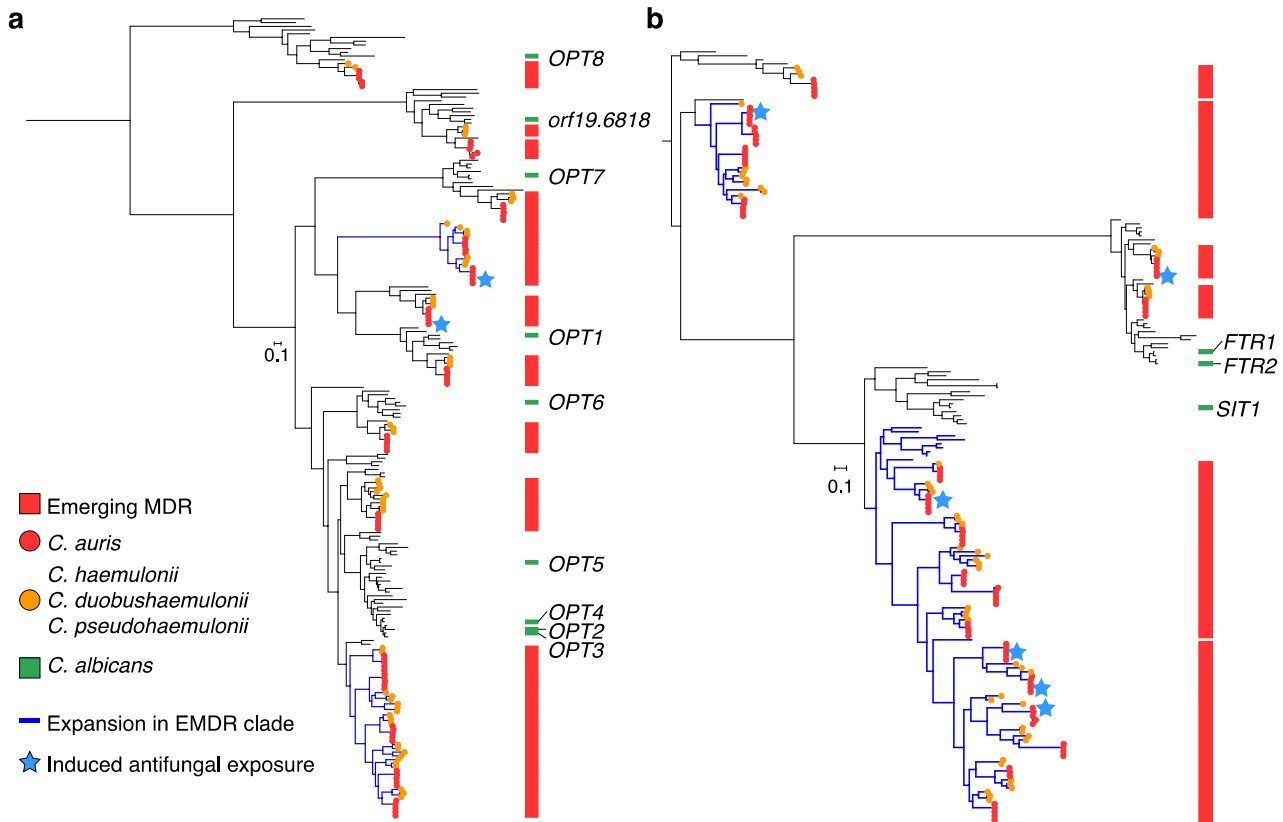

**Supplementary Figure 6.** Phylogenetic relationships of oligopeptide transporters (*OPT*) and siderophore iron transporters (*SIT*) families. Phylogenetic trees estimated by maximum likelihood with RAxML showing expansion of *OPT* (**a**) and *SIT* (**b**) transporter families in emerging multidrug-resistant (MDR) species *C. auris* and *C. haemulonii*, *C. duobushaemulonii* and *C. pseudohaemulonii*. Each species has a color code and lineage-specific expansions (blue branches) can be seen in *C. auris* and closely related species relative to the close ancestor *C. lusitanae* and *C. albicans*. Orthologs of *OPT* and *SIT* transporters in *C. albicans* are depicted along side each tree. Branch lengths indicate the mean number of changes per site.

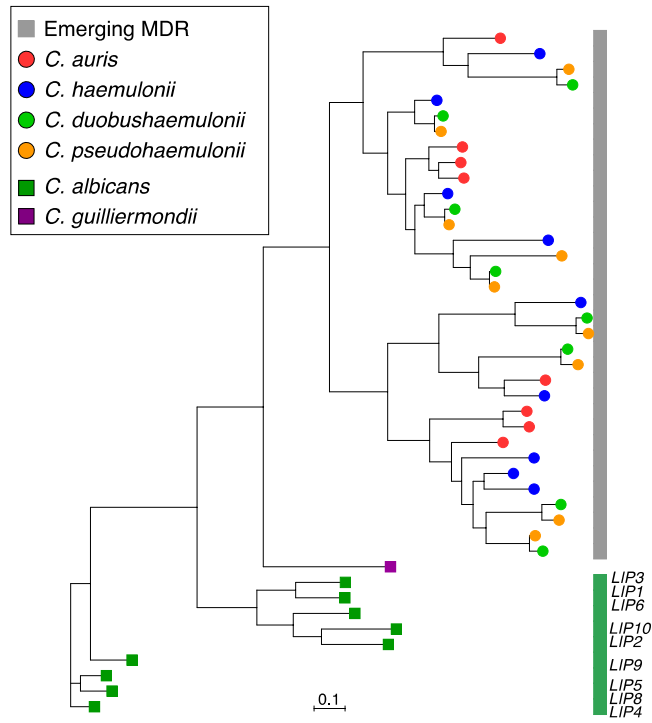

**Supplementary Figure 7.** Phylogeny of secreted lipases. Phylogenetic trees estimated by maximum likelihood with RAxML showing expansion of secreted lipases (*LIP*) in multidrug-resistant (MDR) species *C. auris* and *C. haemulonii*, *C. duobushaemulonii* and *C. pseudohaemulonii*. Each species has a color code. Orthologs of *LIP*(s) in *C. albicans* are depicted along side each tree. Branch lengths indicate the mean number of changes per site.



| Amino acid substitution        | Q21R | F105L | S110A | A114V | D116A | K119S | F126L | Y132F | K143R | F145L | D153E | T229A | Y257A | M258L | E266D | R267T | D278N | H283R | G307S | L403F | S405F | A432S | V437I | N440D | D446E | Y447S | G448E | F487Y | F449I | G450E | G464S | I471M | I483V | V488I |
|--------------------------------|------|-------|-------|-------|-------|-------|-------|-------|-------|-------|-------|-------|-------|-------|-------|-------|-------|-------|-------|-------|-------|-------|-------|-------|-------|-------|-------|-------|-------|-------|-------|-------|-------|-------|
| <i>Candida albicans</i>        | Q    | F     | S     | A     | D     | K     | F     | Y     | K     | F     | D     | T     | Y     | M     | E     | R     | D     | H     | G     | L     | S     | A     | V     | N     | D     | Y     | G     | F     | F     | G     | G     | I     | I     | V     |
| <i>C. auris</i> (B8441 – I)    | V    | L     | A     | A     | A     | S     | F     | Y     | K     | F     | E     | T     | Y     | M     | K     | T     | D     | N     | G     | M     | S     | S     | -     | I     | D     | Y     | G     | Y     | F     | G     | G     | I     | I     | V     |
| <i>C. auris</i> (6684 – I)     | V    | L     | A     | A     | A     | S     | F     | Y     | K     | F     | E     | T     | Y     | M     | K     | T     | D     | N     | G     | M     | S     | S     | -     | I     | D     | Y     | G     | Y     | F     | G     | G     | I     | I     | V     |
| <i>C. auris</i> (B11221 – III) | V    | L     | A     | A     | A     | S     | F     | Y     | K     | F     | E     | T     | Y     | M     | K     | T     | D     | N     | G     | M     | S     | S     | -     | I     | D     | Y     | G     | Y     | F     | G     | G     | I     | I     | V     |
| <i>C. auris</i> (B11220 – II)  | V    | L     | A     | A     | A     | S     | F     | Y     | K     | F     | E     | T     | Y     | M     | K     | T     | D     | N     | G     | M     | S     | S     | -     | I     | D     | Y     | G     | Y     | F     | G     | G     | I     | I     | V     |
| <i>C. auris</i> (B11243 – IV)  | V    | L     | A     | A     | A     | S     | F     | Y     | K     | F     | E     | T     | Y     | M     | K     | T     | D     | N     | G     | M     | S     | S     | -     | I     | D     | Y     | G     | Y     | F     | G     | G     | I     | I     | V     |
| <i>C. haemulonii</i>           | V    | L     | A     | A     | A     | S     | F     | Y     | K     | F     | E     | T     | Y     | M     | K     | N     | D     | N     | G     | M     | S     | L     | -     | I     | D     | Y     | G     | Y     | F     | G     | G     | I     | I     | V     |
| <i>C. duobushaemulonii</i>     | V    | L     | A     | A     | A     | S     | F     | Y     | K     | F     | E     | T     | Y     | M     | K     | T     | D     | N     | G     | M     | S     | S     | -     | I     | D     | Y     | G     | Y     | F     | G     | G     | I     | I     | V     |
| <i>C. pseudohaemulonii</i>     | V    | L     | A     | A     | A     | S     | F     | Y     | K     | F     | E     | T     | Y     | M     | K     | T     | D     | N     | G     | M     | S     | S     | -     | I     | D     | Y     | G     | Y     | F     | G     | G     | I     | I     | V     |
| <i>C. lusitanae</i>            | S    | L     | A     | A     | F     | S     | F     | Y     | K     | F     | D     | T     | Y     | M     | K     | S     | D     | N     | G     | L     | S     | A     | -     | S     | D     | Y     | G     | Y     | F     | G     | G     | I     | I     | V     |
| <i>C. krusei</i>               | Q    | L     | S     | A     | D     | T     | F     | Y     | K     | F     | E     | T     | Y     | L     | A     | G     | D     | N     | G     | L     | S     | S     | I     | N     | D     | Y     | G     | Y     | F     | G     | G     | I     | L     | I     |
| <i>C. glabrata</i>             | Q    | F     | A     | A     | A     | S     | F     | Y     | K     | F     | E     | T     | Y     | M     | E     | K     | D     | N     | G     | L     | S     | A     | -     | A     | D     | Y     | G     | F     | F     | G     | G     | I     | L     | I     |

**Supplementary Figure 8.** Multiple alignment of the azole drug target *ERG11*. Observed amino acid substitutions in *C. albicans* compared with *Candida auris* strains B8441, B11221, 6694, B11220, B11243, *C. haemulonii* (B11899), *C. pseudohaemulonii* (B12108) and *C. duobushaemulonii* (B09383). Red boxes indicate observed azole resistance amino acids substitutions in *C. auris* isolates and *C. haemulonii*, *C. pseudohaemulonii* and *C. duobushaemulonii*. Amino acid numbers are based on *C. albicans* protein sequence. Depicted amino acid substitutions in *ERG11* were observed in previous studies and reported in Lockhart et al., 2016 and Flowers et al., 2014.

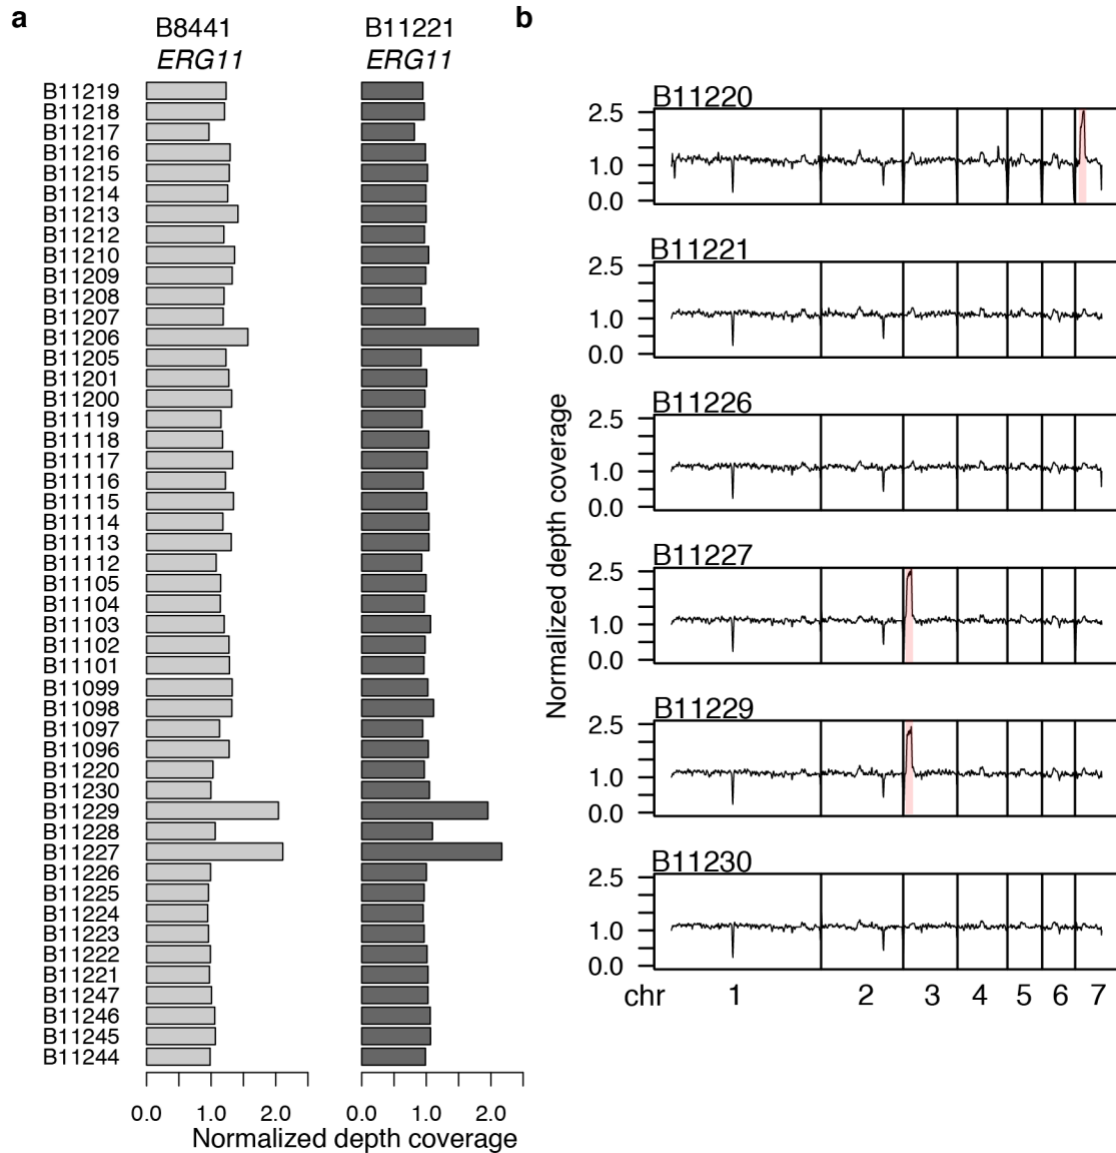

**Supplementary Figure 9.** Copy number variation (CNV) of *ERG11* in *C. auris*. **(a)** The normalized depth read coverage of mapped positions for sequenced *C. auris* isolates from Lockhart *et al.* (2016) mapped to B8441 (*MTLa*) and B11221 (*MTL $\alpha$* ) were computed for *ERG11*. **(b)** Normalized read density distribution in 48 *C. auris* isolates. Each panel corresponds to one strain; the normalized sequence depth (*y-axis*) centered on 1X is shown across the genome assembly of *C. auris* B11221 reference (*x-axis*, scaffolds 1 to 7). Shaded red boxes highlight large duplicated regions or CNV tracts based on normalized read density.

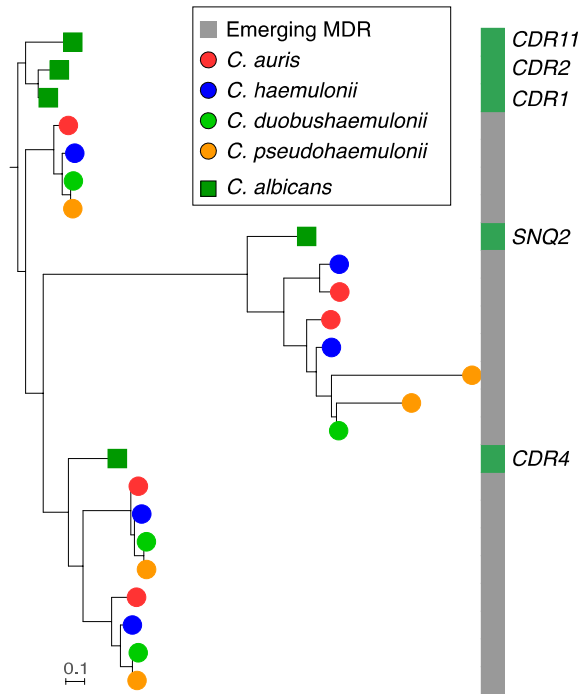

**Supplementary Figure 10.** Phylogeny of known multidrug transporters. Phylogenetic trees estimated by maximum likelihood with RAXML showing phylogenetic relationships of multidrug transporters in multidrug-resistant (MDR) species *C. auris* and *C. haemulonii*, *C. duobushaemulonii* and *C. pseudohaemulonii*. Each species has a color code. Orthologs of multidrug transporters in *C. albicans* are depicted along side each tree. Branch lengths indicate the mean number of changes per site.

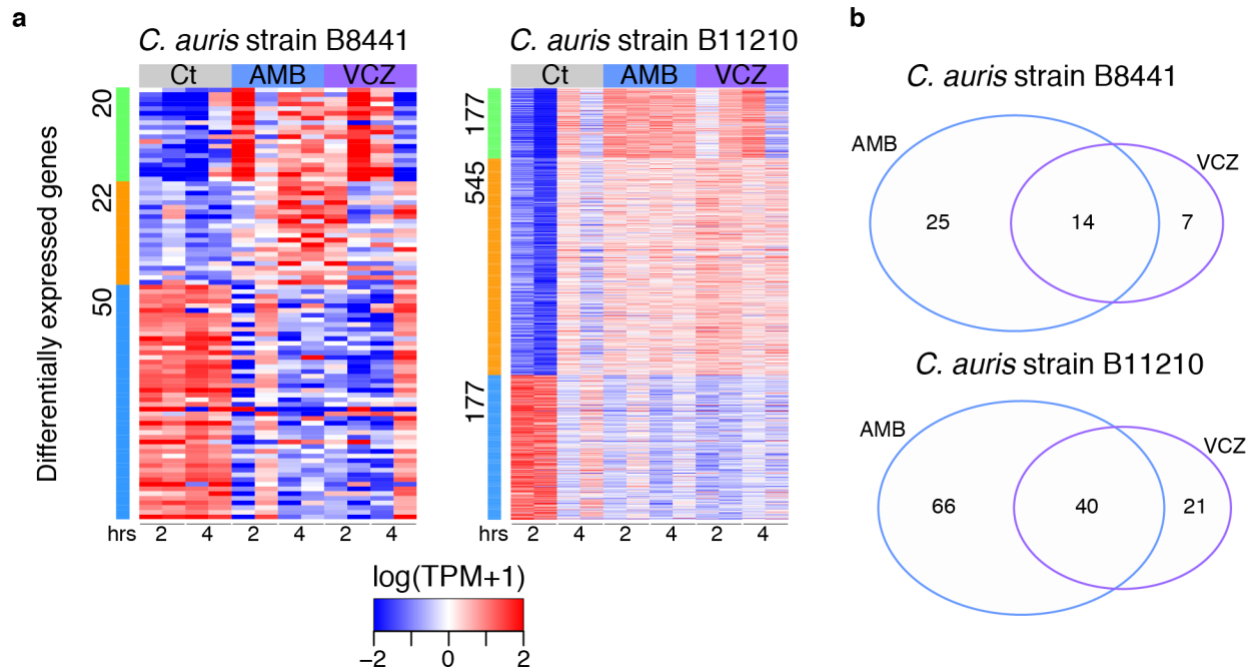

**Supplementary Figure 11.** Transcriptional response during antifungal treatment in *C. auris*. **(a)** Heatmap depicts significantly differentially expressed genes (DEGs; fold-change >2, false discovery rate < 0.05) for *C. auris* strain B8441 (left) and B11210 (right) at 2 and 4 hours during amphotericin B (AMB) and voriconazole (VCZ) treatment. DEGs were grouped by *k-means* (similar expression patterns) into three clusters. Green and orange clusters correspond to genes induced, and blue cluster corresponds to genes repressed during antifungal drug exposure. TPM: transcripts per million. **(b)** Venn diagram depicts number of induced genes in *C. auris* isolate B8441 (DEGs; FC >2, FDR < 0.05; Table S10 sheet1) and isolate B11210 (DEGs; FC >4, FDR < 0.001; Table S10 sheet2) during amphotericin B (AMB) and voriconazole (VCZ) treatment.

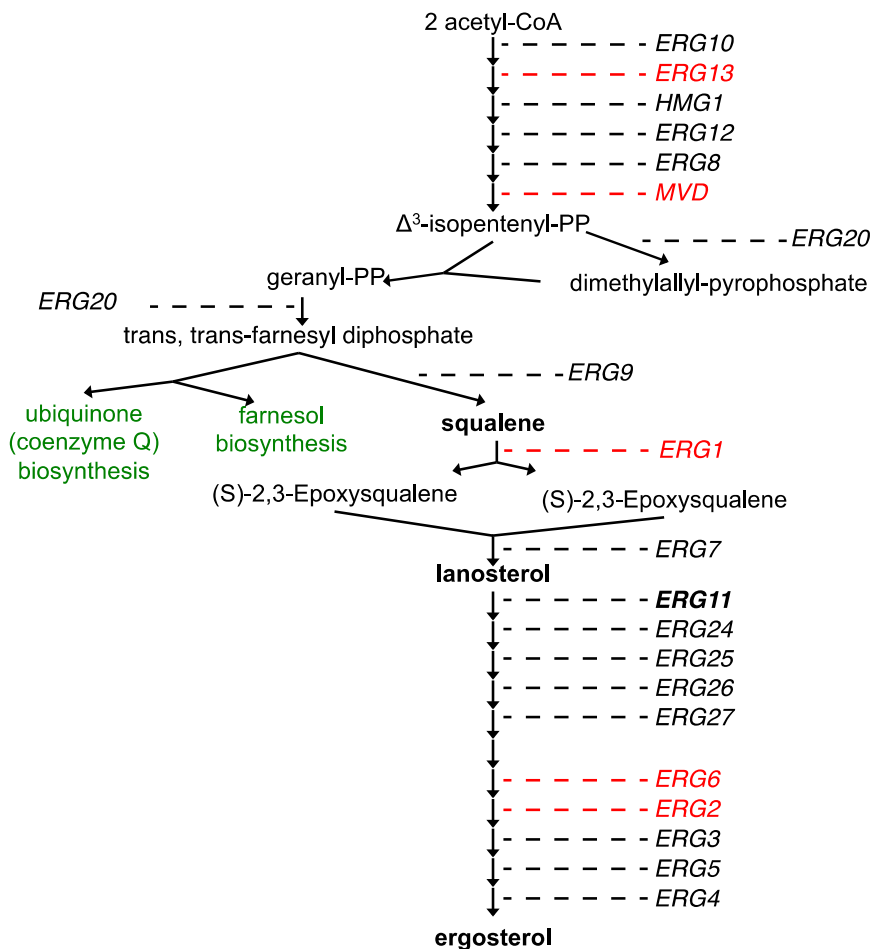

**Supplementary Figure 12.** Ergosterol biosynthesis pathway. Summarized ergosterol pathway in *Candida auris*. Genes in red were induced (fold-change >4, false discovery rate < 0.001) in *C. auris* resistant isolate B11210 (Amphotericin B MIC > 4) upon treatment with Amphotericin B. Table S6 includes the genes IDs for genes in the ergosterol pathway in *C. auris* and closely related species.

## SUPPLEMENTARY TABLES

**Supplementary Table 1.** Antifungal susceptibility testing for isolates included in this study\*

| Species                         | Strain | Clade | Fl   | Vcz  | Amb   | Cs    | And   | 5fc  |
|---------------------------------|--------|-------|------|------|-------|-------|-------|------|
| <i>Candida auris</i>            | B8441  | I     | 8    | 0.06 | 0.75  | 0.25  | 0.5   | 8    |
| <i>Candida auris</i>            | B11221 | III   | 64   | 0.5  | 0.125 | 0.25  | 0.5   | 0.5  |
| <i>Candida auris</i>            | B11220 | II    | 4    | 0.03 | 0.38  | 0.12  | 0.25  | 2    |
| <i>Candida auris</i>            | B11243 | IV    | >256 | 8    | 0.75  | 0.5   | 1     | 0.5  |
| <i>Candida auris</i>            | B11210 | III   | 128  | 1    | 4     | 0.03  | 0.5   | 0.12 |
| <i>Candida auris</i>            | B11227 | III   | 128  | 4    | 0.38  | 0.5   | 1     | 0.5  |
| <i>Candida auris</i>            | B11229 | III   | 64   | 8    | 0.38  | 0.25  | 0.5   | 0.5  |
| <i>Candida auris</i>            | B11206 | I     | 256  | 2    | 1.5   | 0.06  | 0.12  | 0.5  |
| <i>Candida duobushaemulonii</i> | B09383 | .     | 8    | 0.06 | >32   | 0.016 | 0.015 | .    |
| <i>Candida haemulonii</i>       | B11899 | .     | 64   | 0.5  | 8     | 0.5   | 0.03  | 0.12 |
| <i>Candida pseudohaemulonii</i> | B12108 | .     | 256  | 1    | >32   | 0.125 | 0.25  | .    |

\*Fluconazole (Fl); Voriconazole (Vcz); Amphotericin B (Amb); Caspofungin (Cs); Anidulafungin (And); Flucytosine (5fc).

Resistance breakpoints are approximated as follows. Fl  $\geq 32$ ; Amb  $\geq 2$ ; Cs  $\geq 2$ ; And  $\geq 4$ .

**Supplementary Table 2.** Species included in this study

| <b>Species</b>                         | <b>Strain</b> | <b>Clade</b> | <b>Accession ID</b> |
|----------------------------------------|---------------|--------------|---------------------|
| <b><i>Candida auris</i></b>            | B8441         | I            | PEKT00000000        |
| <b><i>Candida auris</i></b>            | B11221        | III          | PGLS00000000        |
| <b><i>Candida auris</i></b>            | B11220        | II           | PYFR00000000        |
| <b><i>Candida auris</i></b>            | B11243        | IV           | PYGM00000000        |
| <b><i>Candida haemulonii</i></b>       | B11899        | .            | PKFO00000000        |
| <b><i>Candida duobushaemulonii</i></b> | B09383        | .            | PKFP00000000        |
| <b><i>Candida pseudohaemulonii</i></b> | B12108        | .            | PYFQ00000000        |
| <i>Candida auris</i>                   | 6684          | I            | .                   |
| <i>Candida lusitanae</i>               | .             | .            | .                   |
| <i>Debaryomyces hansenii</i>           | .             | .            | .                   |
| <i>Candida guilliermondii</i>          | .             | .            | .                   |
| <i>Candida tropicalis</i>              | .             | .            | .                   |
| <i>Candida albicans</i>                | .             | .            | .                   |
| <i>Candida dubliniensis</i>            | .             | .            | .                   |
| <i>Candida orthopsilosis</i>           | .             | .            | .                   |
| <i>Candida parapsilosis</i>            | .             | .            | .                   |
| <i>Lodderomyces elongisporus</i>       | .             | .            | .                   |
| <i>Candida krusei</i>                  | .             | .            | .                   |
| <i>Candida glabrata</i>                | .             | .            | .                   |
| <i>Saccharomyces cerevisiae</i>        | .             | .            | .                   |

bold: assembled and annotated genomes in this study

**Supplementary Table 3. Conservation of mating type genes**

| Gene      | Cau (B8441)  | Cau (B11221) | Cau (B11220) | Cau (B11243) | <i>Cha</i>   | <i>Cps</i>   | <i>Cdu</i>   |
|-----------|--------------|--------------|--------------|--------------|--------------|--------------|--------------|
| PAP1      | B9J08_001453 | CJI97_001149 | CJI96_001795 | CJJ07_004260 | CXQ85_003096 | C7M61_004932 | CXQ87_003540 |
| OBPA      | B9J08_001454 | CJI97_001151 | CJI96_001793 | CJJ07_004261 | CXQ85_003094 | C7M61_004931 | CXQ87_003538 |
| PIKA      | B9J08_001455 | CJI97_001150 | CJI96_001794 | CJJ07_004262 | CXQ85_003095 | C7M61_004930 | CXQ87_003539 |
| SLA2      | B9J08_001427 | CJI97_001177 | CJI96_005494 | CJJ07_002768 | CXQ85_003069 | C7M61_002716 | CXQ87_003512 |
| MAS2      | B9J08_001452 | CJI97_001152 | CJI96_001791 | CJJ07_004259 | CXQ85_003093 | C7M61_004933 | CXQ87_003536 |
| RCY1      | B9J08_001457 | CJI97_001147 | CJI96_001797 | CJJ07_004264 | CXQ85_003099 | C7M61_004928 | CXQ87_003541 |
| MTLa1     | B9J08_005589 | .            | .            | CJJ07_005605 | .            | C7M61_005294 | .            |
| MTLa2     | B9J08_005590 | .            | .            | CJJ07_005606 | .            | C7M61_005295 | .            |
| MTLalpha1 | .            | CJI97_005719 | CJI96_005550 | .            | CXQ85_005415 | .            | CXQ87_005336 |

*Cau* = *Candida auris*; *Cha* = *C. haemulonii*; *Cdu* = *C. duobushaemulonii*; *Cps* = *C. pseudohaemulonii*



**Supplementary Table 4.** Number of differentially expressed\* during drug treatment with amphotericin B or voriconazole in *Candida auris*

|              | B11210-N-2hr  | B11210-N-4hr | B11210-A-2hr | B11210-A-4hr | B11210-V-2hr | B11210-V-4hr | B8441-N-2hr | B8441-N-4hr | B8441-A-2hr | B8441-A-4hr | B8441-V-2hr | B8441-V-4hr |
|--------------|---------------|--------------|--------------|--------------|--------------|--------------|-------------|-------------|-------------|-------------|-------------|-------------|
| B11210-N-2hr |               |              |              |              |              |              |             |             |             |             |             |             |
| B11210-N-4hr | 0             |              |              |              |              |              |             |             |             |             |             |             |
| B11210-A-2hr | 701(162)      | 0            |              |              |              |              |             |             |             |             |             |             |
| B11210-A-4hr | 0             | 0<br>(0)     | 0            |              |              |              |             |             |             |             |             |             |
| B11210-V-2hr | 945 (96)      | 0            | 37           | 0            |              |              |             |             |             |             |             |             |
| B11210-V-4hr | 0             | 1<br>(0)     | 0            | 1            | 0            |              |             |             |             |             |             |             |
| B8441-N-2hr  | 1183<br>(352) | 0            | 0            | 0            | 0            | 0            |             |             |             |             |             |             |
| B8441-N-4hr  | 0             | 0<br>(0)     | 0            | 0            | 0            | 0            | 0           |             |             |             |             |             |
| B8441-A-2hr  | 0             | 0            | 1            | 0            | 0            | 0            | 13<br>(5)   | 0           |             |             |             |             |
| B8441-A-4hr  | 0             | 0            | 0            | 10           | 0            | 0            | 0           | 69<br>(11)  | 0           |             |             |             |
| B8441-V-2hr  | 0             | 0            | 0            | 0            | 12           | 0            | 37<br>(5)   | 0           | 0           | 0           |             |             |
| B8441-V-4hr  | 0             | 0            | 0            | 0            | 0            | 0            | 0           | 2 (2)       | 0           | 2           | 0           |             |

\*Differentially expressed genes (Fold change >4, False Discovery rate < 0.001). Number of genes in parenthesis: Fold change >2, False Discovery rate < 0.05.
