# Supplementary material for: Genomic insights into multidrug-resistance, mating and virulence in Candida auris and related emerging species
Source: PubMed Central journal article supplement (PMC6297351; doi:10.1038/s41467-018-07779-6), 2018-12-17
Supplement: 41467_2018_7779_MOESM2_ESM.pdf [file 41467_2018_7779_MOESM2_ESM.pdf]

## Description of Additional Supplementary Files

File Name: Supplementary Data 1

Description: Conservation of meiosis genes in *Candida auris* and closely related species.

File Name: Supplementary Data 2

Description: Gene conservation analysis and protein family enrichment analysis in *Candida auris* and closely related species.

File Name: Supplementary Data 3

Description: Conservation of ergosterol biosynthesis pathway genes in *Candida auris* and closely related species.

File Name: Supplementary Data 4

Description: Duplicated regions and genes found in these regions in *Candida auris* isolates.

File Name: Supplementary Data 5

Description: Gene copy number variation and conservation in ERG11 and genes associated with drug resistance

File Name: Supplementary Data 6

Description: Genes differentially expressed (Fold change [FC] >4; False discovery rate [FDR] < 0.001) during drug treatment with amphotericin B or voriconazole in *C. auris* isolates B8441 and B11210.

File Name: Supplementary Data 7

Description: Genes differentially expressed (Fold change [FC] >4; False discovery rate [FDR] < 0.001) between untreated *C. auris* isolates B8441 and B11210.

File Name: Supplementary Data 8

Description: Genetic variants, effect and impact in *Candida auris* B8441 and B11210.
