# Supplementary material for: Genomic insights into multidrug-resistance, mating and virulence in Candida auris and related emerging species
Source: Nat Commun. 2018 Dec 17;9:5346. doi: 10.1038/s41467-018-07779-6 (PMC6297351; doi:10.1038/s41467-018-07779-6)
Supplement: Supplementary file 3 — Supplementary Data 1 [file 41467_2018_7779_MOESM3_ESM.xlsx]

## Sheet: Data 1. Meiosis
Supplementary data 1. Conservation of meiosis genes
Category	Gene	S. cerevisiae	C. albicans	Candida auris (B8441 - i)	Candida auris (B11221 - iii)	Candida auris (B11220 - ii)	Candida auris (B11243 - iv)	Candida haemulonii	Candida pseudohaemulonii	Candida duobushaeumulonii
Anaphase promoting complex	CDC27	YBL084C	orf19.3231	B9J08_005346 B9J08_005347	CJI97_005429 CJI97_005430	CJI96_000367 CJI96_000368	CJJ07_003355 CJJ07_003356	CXQ85_000714 CXQ85_000715	C7M61_001942 C7M61_001943	CXQ87_004094
	CDC16	YKL022C	orf19.1792	B9J08_003207	CJI97_003282	CJI96_000917	CJJ07_001247	CXQ85_003265	C7M61_000372	CXQ87_000985
	APC1	YNL172W	orf19.6046	B9J08_003239	CJI97_003314	CJI96_002289	CJJ07_004839	CXQ85_003294	C7M61_000344	CXQ87_001017
	APC5	YOR249C	orf19.6861	B9J08_005223	CJI97_005305	CJI96_001876	CJJ07_000301	CXQ85_000587	.	CXQ87_003979
	CDC23	YHR166C	orf19.6437	B9J08_004910	CJI97_004994	CJI96_004534	CJJ07_001858	CXQ85_001630	C7M61_004793	CXQ87_003633
	CDH1	YGL003C	orf19.2084	B9J08_001647	CJI97_001663	CJI96_004862	CJJ07_000056	CXQ85_001654	.	.
	CDC20	YGL116W	orf19.122	B9J08_004370	CJI97_004433	CJI96_001151	CJJ07_004740	CXQ85_004325	C7M61_002833	CXQ87_001354
Septins	CDC10	YCR002C	orf19.548	B9J08_004834	CJI97_004618	CJI96_001069	CJJ07_000704	CXQ85_003834	C7M61_003585	CXQ87_005078
	CDC3	YLR314C	orf19.1055	B9J08_003359	CJI97_003434	CJI96_005495	CJJ07_005451	CXQ85_003413	C7M61_000232	CXQ87_001123
Cell cycle regulators	CDC14	YFR028C	orf19.4192	B9J08_001868	CJI97_002529	CJI96_000146	CJJ07_002363	CXQ85_001862	C7M61_001039	CXQ87_000307
	CDC5	YMR001C	orf19.6010	B9J08_003424	CJI97_003499	CJI96_001041	CJJ07_001117	CXQ85_003473	C7M61_000173	CXQ87_001183
Regulation, entry into meiosis	IME2	YJL106W	orf19.2395	B9J08_002977	CJI97_003048	CJI96_001819	CJJ07_003645	CXQ85_002326	C7M61_000583	CXQ87_000771
	IME4	YGL192W	orf19.1476	B9J08_000146	CJI97_000151	CJI96_001902	CJJ07_001217	CXQ85_000158	C7M61_001648	CXQ87_002746
	RIM4	YHL024W	orf19.3373	B9J08_003592	CJI97_003665	CJI96_002497	CJJ07_005102	CXQ85_003628	C7M61_000016	.
	NDT80	YHR124W	orf19.2119^	B9J08_000388	CJI97_000388	CJI96_002796	CJJ07_003943	CXQ85_000348	C7M61_001431	CXQ87_003781
	RIM11	YMR139W	orf19.791	B9J08_003732	CJI97_003806	CJI96_000946	CJJ07_002608	CXQ85_004920	C7M61_004550	CXQ87_001992
	RIM15	YFL033C	orf19.7044	B9J08_003281	CJI97_003356	CJI96_002114	CJJ07_000925	CXQ85_003335	C7M61_000304	CXQ87_001054
	UME3	YNL025C	orf19.7355	B9J08_002100	CJI97_002291	CJI96_002010	CJJ07_002260	CXQ85_002591	C7M61_004152	CXQ87_003020
	MCK1	YNL307C	orf19.3459	B9J08_000552	CJI97_000554	CJI96_002757	CJJ07_004002	CXQ85_001406	C7M61_003084	CXQ87_002445
Chromosome cohesion/recombination	MRE11	YMR224C	orf19.6915	B9J08_005411	CJI97_005494	CJI96_000052	CJJ07_003820	CXQ85_000773	C7M61_001998	CXQ87_004152
	RAD50	YNL250W	orf19.1648	B9J08_004166 B9J08_004167	CJI97_004230 CJI97_004231	CJI96_003950 CJI96_003951	CJJ07_002462 CJJ07_002463	CXQ85_004480 CXQ85_004481	C7M61_005238	CXQ87_001209 CXQ87_001210
	RAD1	YPL022W	orf19.5318	B9J08_003740	CJI97_003814	CJI96_000954	CJJ07_003682	CXQ85_004910	C7M61_004540	CXQ87_002001
	MUS81	YDR386W	orf19.4206	B9J08_004596	CJI97_004856	CJI96_000784	CJJ07_002781	CXQ85_004058	C7M61_005022	CXQ87_005303
	RAD54	YGL163C	orf19.5004	B9J08_000487 B9J08_000488	CJI97_000487 CJI97_000488	CJI96_003848 CJI96_003849	CJJ07_004640 CJJ07_004641	CXQ85_001348 CXQ85_001349	C7M61_003024	CXQ87_002385
	MLH1	YMR167W	orf19.4162	B9J08_004425	CJI97_004488	CJI96_003464	CJJ07_000369	CXQ85_004223	C7M61_002937	CXQ87_001457
	MLH3	YPL164C	orf19.7257	B9J08_003189	CJI97_003260	CJI96_000894	CJJ07_001269	CXQ85_002423	.	.
	PMS1	YNL082W	orf19.1605	B9J08_000094 B9J08_000095	CJI97_000099 CJI97_000100	CJI96_004574 CJI96_004575	CJJ07_000510 CJJ07_000511	CXQ85_000108	C7M61_001695	CXQ87_002796
	SMC1	YFL008W	orf19.4367	B9J08_004853	CJI97_004599	CJI96_003296	CJJ07_000723	CXQ85_003816	C7M61_003603	CXQ87_005059
	SMC2	YFR031C	orf19.3623	B9J08_000133	CJI97_000138	CJI96_001889	CJJ07_001230	CXQ85_000146	C7M61_001659	CXQ87_002759
	SMC3	YJL074C	orf19.262	B9J08_005053	CJI97_005137	CJI96_003434	CJJ07_000476	CXQ85_000316	C7M61_001402	CXQ87_003811
	SMC4	YLR086W	orf19.964	B9J08_001305	CJI97_001300 CJI97_005717	CJI96_000348	CJJ07_004928	CXQ85_002952	C7M61_002593	CXQ87_003388
	SMC5	YOL034W	orf19.2417	B9J08_000355	CJI97_000355	CJI96_003939	CJJ07_001977	CXQ85_000377	C7M61_001462	CXQ87_003750
	SMC6	YLR383W	orf19.6568	B9J08_004726	CJI97_004725	CJI96_003652	CJJ07_003607	CXQ85_003939	C7M61_003476	CXQ87_005184
	SCC3	YIL026C	orf19.7232	B9J08_003057	CJI97_003129	CJI96_004594	CJJ07_004663	CXQ85_002401	C7M61_000512	CXQ87_000842
	PDS5	YMR076C	orf19.2216	B9J08_001130	CJI97_001476	CJI96_002732	CJJ07_003559	CXQ85_002782	C7M61_005212	CXQ87_003219
	RAD51	YER095W	orf19.3752	B9J08_001108	CJI97_001498	CJI96_002710	CJJ07_003581	CXQ85_002761	C7M61_004872	CXQ87_003199
	RAD52	YML032C	orf19.4208	B9J08_000514	CJI97_000516	CJI96_005159	CJJ07_003905	CXQ85_001373	C7M61_003048	CXQ87_002410
	RAD55	YDR076W	.	.	.	.	.	.	.	.
	RAD57	YDR004W	orf19.2174	.	.	.	.	.	.	.
	MSH2	YOL090W	orf19.3093	B9J08_005310	CJI97_005394	CJI96_000625	CJJ07_004859	CXQ85_000675	C7M61_001908	CXQ87_004061
	MSH6	YDR097C	orf19.4945	B9J08_002030	CJI97_002221	CJI96_000259	CJJ07_002141	CXQ85_002525	C7M61_004088	CXQ87_002957
Synaptonemal complex proteins	MND2	YIR025W	orf19.4400	B9J08_002807	CJI97_002862	CJI96_002478	CJJ07_004578	CXQ85_002165	C7M61_000737	CXQ87_000615
Chromosome segregation	TID3	YIL144W	orf19.2827	B9J08_004086	CJI97_004154	CJI96_005150	CJJ07_000837	CXQ85_004576	C7M61_005131	CXQ87_004662
DNA repair	RAD23	YEL037C	orf19.1494	B9J08_004856	CJI97_004596	CJI96_003299	CJJ07_000726	CXQ85_003810	C7M61_003606	CXQ87_005056
	EXO1	YOR033C	orf19.926	B9J08_002051 B9J08_002052	CJI97_002242 CJI97_002243	CJI96_000279 CJI96_000280	CJJ07_000180 CJJ07_000181	CXQ85_002544 CXQ85_002545	C7M61_004108 C7M61_004109	CXQ87_002975
	HRR25	YPL204W	orf19.3476	B9J08_002235	CJI97_001548	CJI96_003999	CJJ07_001394	CXQ85_002714	C7M61_004380	CXQ87_003150
Other genes in conserved meiotic program	HUL4	YJR036C	orf19.5892	B9J08_005506	CJI97_005588	CJI96_004335	CJJ07_003488	CXQ85_000862	C7M61_002090	CXQ87_004243
	ENA2	YDR039C	orf19.6070	B9J08_000969 B9J08_002173	CJI97_000988 CJI97_001608	CJI96_000574 CJI96_001282	CJJ07_001333 CJJ07_001553	CXQ85_001174 CXQ85_002658	C7M61_002169 C7M61_004437	CXQ87_002207 CXQ87_003094
	PMC1	YGL006W	orf19.1727	B9J08_000175	CJI97_000177	CJI96_002222	CJJ07_001188	CXQ85_000183	C7M61_001621	CXQ87_002721
	CMK2	YOL016C	orf19.1754	B9J08_003453	CJI97_003527	CJI96_001013	CJJ07_005197	CXQ85_003500	C7M61_000146	CXQ87_001726
	CHS1	YNL192W	orf19.7298	B9J08_002856 B9J08_003879 B9J08_005077	CJI97_002912 CJI97_003951 CJI97_005162	CJI96_000310 CJI96_001478 CJI96_003760	CJJ07_000439 CJJ07_000976 CJJ07_001822	CXQ85_000294 CXQ85_002214 CXQ85_004777	C7M61_000692 C7M61_001377 C7M61_003709	CXQ87_000658 CXQ87_003834 CXQ87_004488
	ISA1	YLL027W	orf19.5521	B9J08_001641	CJI97_001669	CJI96_000738	CJJ07_000062	CXQ85_001648	C7M61_001247	CXQ87_000099
	HTZ1	YOL012C	orf19.327	B9J08_003996	CJI97_004027	CJI96_004883	CJJ07_002018	CXQ85_004700	C7M61_003304	CXQ87_001652
	ROM2	YLR371W	orf19.906	B9J08_000510	CJI97_000511	CJI96_004085	CJJ07_003910	CXQ85_001367	C7M61_003043	CXQ87_002404
	RAS2	YNL098C	orf19.1760	B9J08_003446	CJI97_003520	CJI96_001020	CJJ07_004440	CXQ85_003493	C7M61_000153	CXQ87_001719
	GNA1	YFL017C	orf19.837	B9J08_005328	CJI97_005411	CJI96_000607	CJJ07_004476	CXQ85_000696	C7M61_001925	CXQ87_004077
	SGA1	YIL099W	orf19.1719	B9J08_000365	CJI97_000365	CJI96_001271	CJJ07_001987	CXQ85_000368	C7M61_001452	CXQ87_003759
	CLG1	YGL215W	orf19.6146	B9J08_002220	CJI97_001563	CJI96_004739	CJJ07_001379	CXQ85_002700	C7M61_004395	CXQ87_003136
	ECM4	YKR076W	orf19.2613	B9J08_001103	CJI97_001503	CJI96_004311	CJJ07_005257	CXQ85_002756	C7M61_004338	CXQ87_003195
	TOS7	YOL019W	orf19.1510	B9J08_002180	CJI97_001602	CJI96_001289	CJJ07_001340	.	C7M61_004431	CXQ87_003099
	RIB5	YBR256C	orf19.4024	B9J08_001478	CJI97_001126	CJI96_003221	CJJ07_004369	CXQ85_003120	C7M61_004908	CXQ87_003562
	CHO1	YER026C	orf19.677	B9J08_005295	CJI97_005379	CJI96_000640	CJJ07_005390	CXQ85_000658	C7M61_001893	CXQ87_004047
	XKS1	YGR194C	orf19.1290	B9J08_005578	CJI97_003278	CJI96_000913	CJJ07_001251	CXQ85_003261	C7M61_000376	CXQ87_000980
	PCT1	YGR202C	orf19.4186	B9J08_004408	CJI97_004471	CJI96_001971	CJJ07_003294	CXQ85_004238	C7M61_002923	CXQ87_001443
	ELC1	YPL046C	orf19.6849	B9J08_003379	CJI97_003454	CJI96_003498	CJJ07_001072	CXQ85_003431	C7M61_000214	CXQ87_001142
	PGM2	YMR105C	orf19.2841	B9J08_002477	CJI97_002020	CJI96_003259	CJJ07_003383	CXQ85_005030	C7M61_004228	CXQ87_004905
	RKI1	YOR095C	orf19.1701	B9J08_000186	CJI97_000188	CJI96_002233	CJJ07_001177	CXQ85_000193	C7M61_001610	CXQ87_002710
	SUR4	YLR372W	orf19.908	B9J08_000511	CJI97_000512	CJI96_004084	CJJ07_003909	CXQ85_001368	C7M61_003044	CXQ87_002405
	PIB1	YDR313C	orf19.7547	B9J08_003689	CJI97_003764	CJI96_004411	CJJ07_004880	CXQ85_003719	C7M61_004699	CXQ87_001946
	PIN3	YPR154W	orf19.5956	B9J08_004460	CJI97_004524	CJI96_004146	CJJ07_000334	CXQ85_004189	C7M61_002973	CXQ87_001494
	SSO2	YMR183C	orf19.1376	B9J08_002401	CJI97_001945	CJI96_002431	CJJ07_004374	CXQ85_005110	C7M61_003871	CXQ87_004833
	FBP1	YLR377C	orf19.6178	B9J08_005163	CJI97_005247	CJI96_003802	CJJ07_000238	CXQ85_000526	C7M61_005052	CXQ87_003924
	GLG1/GLG2 (WGD)	YKR058W	orf19.7434	B9J08_004833	CJI97_004619	CJI96_001070	CJJ07_000703	CXQ85_003835	C7M61_003584	CXQ87_005079
	GDI1	YER136W	orf19.7261	B9J08_005447	CJI97_005530	CJI96_002400	CJJ07_002962	CXQ85_000807	C7M61_002034	CXQ87_004188
	PDC1	YLR044C	orf19.2877	B9J08_000901 B9J08_002231	CJI97_000919 CJI97_001552	CJI96_004003 CJI96_004665	CJJ07_001390 CJJ07_003870	CXQ85_001109 CXQ85_002710	C7M61_002228 C7M61_004330 C7M61_004384	CXQ87_002140 CXQ87_003146 CXQ87_005007
	OXR1	YPL196W	orf19.243	B9J08_000410	CJI97_000410	CJI96_002207	CJJ07_003922	CXQ85_000327	C7M61_001412	CXQ87_003801
	KGD1	YIL125W	orf19.6165	B9J08_002363	CJI97_001908	CJI96_001452	CJJ07_004787	CXQ85_005143	C7M61_003900	CXQ87_004800
	DAP1	YPL170W	orf19.489	B9J08_001847	CJI97_002508	CJI96_000125	CJJ07_002342	CXQ85_001841	C7M61_001060	CXQ87_000286
	SPO7	YAL009W	orf19.6885	B9J08_000875	CJI97_000893	CJI96_004786	CJJ07_005493	CXQ85_001084	C7M61_002257	CXQ87_002112
	GSG1	YDR108W	orf19.3764	B9J08_003470	CJI97_003544	CJI96_004644	CJJ07_001735	CXQ85_003517	C7M61_000130	CXQ87_001742
	RMD8	YFR048W	orf19.7058	B9J08_001157	CJI97_001449	CJI96_004163	CJJ07_004274	CXQ85_002809	C7M61_002455	CXQ87_003245
	RMD11	YHL023C	orf19.6444	B9J08_004906	CJI97_004990	CJI96_004539	CJJ07_001862	CXQ85_001633	C7M61_004789	CXQ87_003629
	NEM1	YHR004C	orf19.4657	B9J08_000768	CJI97_000769	CJI96_001354	CJJ07_000605	CXQ85_000981	C7M61_002361	.
	EMI5	YOL071W	orf19.4727	B9J08_002910	CJI97_002984	CJI96_000332	CJJ07_001029	CXQ85_002263	C7M61_000641	CXQ87_000709
	MUS81	YDR386W	orf19.4206	B9J08_004596	CJI97_004856	CJI96_000784	CJJ07_002781	CXQ85_004058	C7M61_005022	CXQ87_005303
	NAM8	YHR086W	orf19.1876	B9J08_001146	CJI97_001460	CJI96_003837	CJJ07_004899	CXQ85_002798	C7M61_005227	CXQ87_003233
Spore Assembly Genes	DIT1	YDR403W	orf19.1741	B9J08_000284	CJI97_000285	CJI96_004207	CJJ07_001599	CXQ85_000448	C7M61_001526	CXQ87_002623
	DIT2	YDR402C	orf19.554	B9J08_004885	CJI97_004567	.	CJJ07_000757	CXQ85_003775	C7M61_003635	CXQ87_005028
	DTR1	YBR180W	orf19.553	.	.	.	.	.	.	.
	NDT80	YHR124W	orf19.2119	B9J08_000388	CJI97_000388	CJI96_002796	CJJ07_003943	CXQ85_000348	C7M61_001431	CXQ87_003781
	SMK1	YPR054W	orf19.7208	.	CJI97_002636	CJI96_001660	CJJ07_003543	CXQ85_001960	C7M61_000940	CXQ87_000405
	SPO14	YKR031C	orf19.1161	B9J08_001576	CJI97_001734	CJI96_002555	CJJ07_000127	CXQ85_005331	C7M61_001307	CXQ87_000038
	SPO71	YDR104C	orf19.2129	B9J08_000841	CJI97_000859	CJI96_004898	CJJ07_004691	CXQ85_001050	C7M61_002289	CXQ87_002077
	SPO75	YLL005C	orf19.1311	.	.	.	.	.	.	.
	SPS1	YDR523C	orf19.3049	B9J08_002053	CJI97_002244	CJI96_000281	CJJ07_000179	CXQ85_002546	C7M61_004110	CXQ87_002976
	SSP2	YOR242C	orf19.1746	.	.	.	.	.	.	.
	TEP1	YNL128w	orf19.3699	B9J08_001034	CJI97_001054	CJI96_005499	CJJ07_004188	CXQ85_001237	C7M61_004592	CXQ87_002269
	YEL023C	YEL023c	orf19.5894	B9J08_005504	CJI97_005586	CJI96_004337	CJJ07_003486	CXQ85_000860	C7M61_002088	CXQ87_004241
	SPO1	YNL012W	orf19.4151	B9J08_002814	CJI97_002870	CJI96_002470	CJJ07_003401	CXQ85_002172	.	CXQ87_000619
