# Supplementary material for: Genomic insights into multidrug-resistance, mating and virulence in Candida auris and related emerging species
Source: Nat Commun. 2018 Dec 17;9:5346. doi: 10.1038/s41467-018-07779-6 (PMC6297351; doi:10.1038/s41467-018-07779-6)
Supplement: Supplementary file 4 — Supplementary Data 2 [file 41467_2018_7779_MOESM4_ESM.xlsx]

## Sheet: Data2. Protein fam enrichment
Supplementary data 2. Gene conservation - protein family enrichment analysis in core and unique genes in C. auris and closely related species
Pfam	Core #	Non_Core #	fisher p	corr p
PF00069.20|Pkinase[Protein kinase domain]	63	31	0.000227198	0.028892
PF00271.26|Helicase_C[Helicase conserved C-terminal domain]	44	11	1.76481e-06	0.000598467
PF00004.24|AAA[ATPase family associated with various cellular activities (AAA)]	36	5	1.1801e-07	6.0028e-05
PF00270.24|DEAD[DEAD/DEAH box helicase]	35	11	0.000146962	0.0213585
PF07690.11|MFS_1[Major Facilitator Superfamily]	24	83	3.98063e-08	4.04963e-05
PF07728.9|AAA_5[AAA domain (dynein-related subfamily)]	17	2	0.000264836	0.0299363
PF00172.13|Zn_clus[Fungal Zn(2)-Cys(6) binuclear cluster domain]	15	54	7.94129e-06	0.00201974
PF00083.19|Sugar_tr[Sugar (and other) transporter]	12	43	6.48324e-05	0.0109927
PF00096.21|zf-C2H2[Zinc finger, C2H2 type]	2	22	4.47489e-05	0.00910492

## Sheet: Data2. Pfam
Supplementary data 2. Gene conservation PFAM domains
Pfam	Candida auris B11220	Candida auris B11221	Candida auris B11243	Candida auris B8441	Candida auris 6684	Candida duobushaeumulonii B09383	Candida haemulonii B11899	Candida pseudohaemulonii B12108
PF13905.1|Thioredoxin_8[Thioredoxin-like]	3	2	2	3	3	0	0	0
PF00399.14|PIR[Yeast_PIR_protein_repeat]	2	2	2	2	2	0	0	0
PF05676.8|NDUF_B7[NADH-ubiquinone_oxidoreductase_B18_subunit_(NDUFB7)]	2	2	2	2	2	0	0	0
PF07387.6|Seadorna_VP7[Seadornavirus_VP7]	2	2	2	2	2	0	0	0
PF08209.6|Sgf11[Sgf11_(transcriptional_regulation_protein)]	2	2	1	2	2	0	0	0
PF11022.3|DUF2611[Protein_of_unknown_function_(DUF2611)]	2	1	2	2	2	0	0	0
PF01057.12|Parvo_NS1[Parvovirus_non-structural_protein_NS1]	1	1	1	1	1	0	0	0
PF01200.13|Ribosomal_S28e[Ribosomal_protein_S28e]	1	1	1	1	1	0	0	0
PF01745.11|IPT[Isopentenyl_transferase]	1	1	1	1	1	0	0	0
PF01779.12|Ribosomal_L29e[Ribosomal_L29e_protein_family]	1	1	1	1	1	0	0	0
PF01987.12|AIM24[Mitochondrial_biogenesis_AIM24]	1	1	1	1	1	0	0	0
PF02487.12|CLN3[CLN3_protein]	1	1	1	1	1	0	0	0
PF02655.9|ATP-grasp_3[ATP-grasp_domain]	1	1	1	1	1	0	0	0
PF03911.11|Sec61_beta[Sec61beta_family]	1	1	1	1	1	0	0	0
PF04418.7|DUF543[Domain_of_unknown_function_(DUF543)]	1	1	1	1	1	0	0	0
PF04774.10|HABP4_PAI-RBP1[Hyaluronan_/_mRNA_binding_family]	1	1	1	1	1	0	0	0
PF04892.7|VanZ[VanZ_like_family]	1	1	1	1	1	0	0	0
PF05160.8|DSS1_SEM1[DSS1/SEM1_family]	1	1	1	1	1	0	0	0
PF05493.8|ATP_synt_H[ATP_synthase_subunit_H]	1	1	1	1	1	0	0	0
PF05822.7|UMPH-1[Pyrimidine_5'-nucleotidase_(UMPH-1)]	1	1	1	1	1	0	0	0
PF05977.8|MFS_3[Transmembrane_secretion_effector]	1	1	1	1	1	0	0	0
PF06550.6|DUF1119[Protein_of_unknown_function_(DUF1119)]	1	1	1	1	1	0	0	0
PF06842.7|DUF1242[Protein_of_unknown_function_(DUF1242)]	1	1	1	1	1	0	0	0
PF07297.7|DPM2[Dolichol_phosphate-mannose_biosynthesis_regulatory_protein_(DPM2)]	1	1	1	1	1	0	0	0
PF07693.9|KAP_NTPase[KAP_family_P-loop_domain]	1	1	1	1	1	0	0	0
PF08211.6|dCMP_cyt_deam_2[Cytidine_and_deoxycytidylate_deaminase_zinc-binding_region]	1	1	1	1	1	0	0	0
PF08561.5|Ribosomal_L37[Mitochondrial_ribosomal_protein_L37]	1	1	1	1	1	0	0	0
PF08649.5|DASH_Dad1[DASH_complex_subunit_Dad1]	1	1	1	1	1	0	0	0
PF08658.5|Rad54_N[Rad54_N_terminal]	1	1	1	1	1	0	0	0
PF08709.6|Ins145_P3_rec[Inositol_1,4,5-trisphosphate/ryanodine_receptor]	1	1	1	1	1	0	0	0
PF09296.6|NUDIX-like[NADH_pyrophosphatase-like_rudimentary_NUDIX_domain]	1	1	1	1	1	0	0	0
PF09742.4|Dymeclin[Dyggve-Melchior-Clausen_syndrome_protein]	1	1	1	1	1	0	0	0
PF09759.4|Atx10homo_assoc[Spinocerebellar_ataxia_type_10_protein_domain]	1	1	1	1	1	0	0	0
PF10937.3|DUF2638[Protein_of_unknown_function_(DUF2638)]	1	1	1	1	1	0	0	0
PF11793.3|FANCL_C[FANCL_C-terminal_domain]	1	1	1	1	1	0	0	0
PF13878.1|zf-C2H2_3[zinc-finger_of_acetyl-transferase_ESCO]	1	1	1	1	1	0	0	0
PF13880.1|Acetyltransf_13[ESCO1/2_acetyl-transferase]	1	1	1	1	1	0	0	0
PF13917.1|zf-CCHC_3[Zinc_knuckle]	1	1	1	1	1	0	0	0
PF14835.1|zf-RING_6[zf-RING_of_BARD1-type_protein]	1	1	1	1	1	0	0	0
PF15577.1|Spc7_C2[Spc7_C2]	1	1	1	1	1	0	0	0
PF15624.1|Mif2_N[Kinetochore_CENP-C_fungal_homologue,_Mif2,_N-terminal]	1	1	1	1	1	0	0	0
TIGR01354[cyt_deam_tetra:_cytidine_deaminase]	1	1	1	1	1	0	0	0
TIGR01473[cyoE_ctaB:_protoheme_IX_farnesyltransferase]	1	1	1	1	1	0	0	0
TIGR01700[PNPH:_purine_nucleoside_phosphorylase_I,_inosine_and_guanosine-specific]	1	1	1	1	1	0	0	0
PF00497.15|SBP_bac_3[Bacterial_extracellular_solute-binding_proteins,_family_3]	1	1	0	1	1	0	0	0
PF00584.15|SecE[SecE/Sec61-gamma_subunits_of_protein_translocation_complex]	0	1	1	1	1	0	0	0
PF07975.7|C1_4[TFIIH_C1-like_domain]	1	0	1	1	1	0	0	0
PF08227.6|DASH_Hsk3[DASH_complex_subunit_Hsk3_like]	1	0	1	1	1	0	0	0
PF09468.5|RNase_H2-Ydr279[Ydr279p_protein_family_(RNase_H2_complex_component)]	1	1	1	1	0	0	0	0
PF10200.4|Ndufs5[NADH:ubiquinone_oxidoreductase,_NDUFS5-15kDa]	1	1	1	0	1	0	0	0
PF14712.1|Snapin_Pallidin[Snapin/Pallidin]	1	1	0	1	1	0	0	0
TIGR01023[rpmG_bact:_ribosomal_protein_L33]	1	0	1	1	1	0	0	0
PF01194.12|RNA_pol_N[RNA_polymerases_N_/_8_kDa_subunit]	1	0	1	1	0	0	0	0
PF06564.7|YhjQ[YhjQ_protein]	1	0	0	1	1	0	0	0
PF10275.4|Peptidase_C65[Peptidase_C65_Otubain]	1	1	1	0	0	0	0	0
PF12009.3|Telomerase_RBD[Telomerase_ribonucleoprotein_complex_-_RNA_binding_domain]	1	0	1	0	1	0	0	0
PF06090.7|Ins_P5_2-kin[Inositol-pentakisphosphate_2-kinase]	1	0	1	0	0	0	0	0
PF08840.6|BAAT_C[BAAT_/_Acyl-CoA_thioester_hydrolase_C_terminal]	0	0	1	1	0	0	0	0
PF10215.4|Ost4[Oligosaccaryltransferase]	0	0	1	0	1	0	0	0
PF04687.7|Microvir_H[Microvirus_H_protein_(pilot_protein)]	1	0	0	0	0	0	0	0
PF10058.4|DUF2296[Predicted_integral_membrane_metal-binding_protein_(DUF2296)]	1	0	0	0	0	0	0	0
PF00017.19|SH2[SH2_domain]	0	0	0	0	0	0	0	0
PF00032.12|Cytochrom_B_C[Cytochrome_b(C-terminal)/b6/petD]	0	0	0	0	0	0	0	0
PF00041.16|fn3[Fibronectin_type_III_domain]	0	0	0	0	0	0	0	0
PF00061.18|Lipocalin[Lipocalin_/_cytosolic_fatty-acid_binding_protein_family]	0	0	0	0	0	0	0	0
PF00092.23|VWA[von_Willebrand_factor_type_A_domain]	0	0	0	0	0	0	0	0
PF00112.18|Peptidase_C1[Papain_family_cysteine_protease]	0	0	0	0	0	0	0	0
PF00115.15|COX1[Cytochrome_C_and_Quinol_oxidase_polypeptide_I]	0	0	0	0	0	0	0	0
PF00135.23|COesterase[Carboxylesterase_family]	0	0	0	0	0	0	0	0
PF00139.14|Lectin_legB[Legume_lectin_domain]	0	0	0	0	0	0	0	0
PF00142.13|Fer4_NifH[4Fe-4S_iron_sulfur_cluster_binding_proteins,_NifH/frxC_family]	0	0	0	0	0	0	0	0
PF00165.18|HTH_AraC[Bacterial_regulatory_helix-turn-helix_proteins,_AraC_family]	0	0	0	0	0	0	0	0
PF00187.14|Chitin_bind_1[Chitin_recognition_protein]	0	0	0	0	0	0	0	0
PF00232.13|Glyco_hydro_1[Glycosyl_hydrolase_family_1]	0	0	0	0	0	0	0	0
PF00295.12|Glyco_hydro_28[Glycosyl_hydrolases_family_28]	0	0	0	0	0	0	0	0
PF00296.15|Bac_luciferase[Luciferase-like_monooxygenase]	0	0	0	0	0	0	0	0
PF00308.13|Bac_DnaA[Bacterial_dnaA_protein]	0	0	0	0	0	0	0	0
PF00361.15|Oxidored_q1[NADH-Ubiquinone/plastoquinone_(complex_I),_various_chains]	0	0	0	0	0	0	0	0
PF00437.15|T2SE[Type_II/IV_secretion_system_protein]	0	0	0	0	0	0	0	0
PF00465.14|Fe-ADH[Iron-containing_alcohol_dehydrogenase]	0	0	0	0	0	0	0	0
PF00519.12|PPV_E1_C[Papillomavirus_helicase]	0	0	0	0	0	0	0	0
PF00624.13|Flocculin[Flocculin_repeat]	0	0	0	0	0	0	0	0
PF00643.19|zf-B_box[B-box_zinc_finger]	0	0	0	0	0	0	0	0
PF00648.16|Peptidase_C2[Calpain_family_cysteine_protease]	0	0	0	0	0	0	0	0
PF00674.13|DUP[DUP_family]	0	0	0	0	0	0	0	0
PF00703.16|Glyco_hydro_2[Glycosyl_hydrolases_family_2]	0	0	0	0	0	0	0	0
PF00728.17|Glyco_hydro_20[Glycosyl_hydrolase_family_20,_catalytic_domain]	0	0	0	0	0	0	0	0
PF00734.13|CBM_1[Fungal_cellulose_binding_domain]	0	0	0	0	0	0	0	0
PF00775.16|Dioxygenase_C[Dioxygenase]	0	0	0	0	0	0	0	0
PF00872.13|Transposase_mut[Transposase,_Mutator_family]	0	0	0	0	0	0	0	0
PF00873.14|ACR_tran[AcrB/AcrD/AcrF_family]	0	0	0	0	0	0	0	0
PF00881.19|Nitroreductase[Nitroreductase_family]	0	0	0	0	0	0	0	0
PF00882.13|Zn_dep_PLPC[Zinc_dependent_phospholipase_C]	0	0	0	0	0	0	0	0
PF00891.13|Methyltransf_2[O-methyltransferase]	0	0	0	0	0	0	0	0
PF00992.15|Troponin[Troponin]	0	0	0	0	0	0	0	0
PF01021.14|TYA[TYA_transposon_protein]	0	0	0	0	0	0	0	0
PF01036.13|Bac_rhodopsin[Bacteriorhodopsin-like_protein]	0	0	0	0	0	0	0	0
PF01087.17|GalP_UDP_transf[Galactose-1-phosphate_uridyl_transferase,_N-terminal_domain]	0	0	0	0	0	0	0	0
PF01102.13|Glycophorin_A[Glycophorin_A]	0	0	0	0	0	0	0	0
PF01113.15|DapB_N[Dihydrodipicolinate_reductase,_N-terminus]	0	0	0	0	0	0	0	0
PF01135.14|PCMT[Protein-L-isoaspartate(D-aspartate)_O-methyltransferase_(PCMT)]	0	0	0	0	0	0	0	0
PF01144.18|CoA_trans[Coenzyme_A_transferase]	0	0	0	0	0	0	0	0
PF01232.18|Mannitol_dh[Mannitol_dehydrogenase_Rossmann_domain]	0	0	0	0	0	0	0	0
PF01244.16|Peptidase_M19[Membrane_dipeptidase_(Peptidase_family_M19)]	0	0	0	0	0	0	0	0
PF01286.13|XPA_N[XPA_protein_N-terminal]	0	0	0	0	0	0	0	0
PF01394.15|Clathrin_propel[Clathrin_propeller_repeat]	0	0	0	0	0	0	0	0
PF01419.12|Jacalin[Jacalin-like_lectin_domain]	0	0	0	0	0	0	0	0
PF01443.13|Viral_helicase1[Viral_(Superfamily_1)_RNA_helicase]	0	0	0	0	0	0	0	0
PF01476.15|LysM[LysM_domain]	0	0	0	0	0	0	0	0
PF01527.15|HTH_Tnp_1[Transposase]	0	0	0	0	0	0	0	0
PF01541.19|GIY-YIG[GIY-YIG_catalytic_domain]	0	0	0	0	0	0	0	0
PF01580.13|FtsK_SpoIIIE[FtsK/SpoIIIE_family]	0	0	0	0	0	0	0	0
PF01678.14|DAP_epimerase[Diaminopimelate_epimerase]	0	0	0	0	0	0	0	0
PF01770.13|Folate_carrier[Reduced_folate_carrier]	0	0	0	0	0	0	0	0
PF01817.16|CM_2[Chorismate_mutase_type_II]	0	0	0	0	0	0	0	0
PF01839.18|FG-GAP[FG-GAP_repeat]	0	0	0	0	0	0	0	0
PF01921.13|tRNA-synt_1f[tRNA_synthetases_class_I_(K)]	0	0	0	0	0	0	0	0
PF01930.12|Cas_Cas4[Domain_of_unknown_function_DUF83]	0	0	0	0	0	0	0	0
PF01997.11|Translin[Translin_family]	0	0	0	0	0	0	0	0
PF02050.11|FliJ[Flagellar_FliJ_protein]	0	0	0	0	0	0	0	0
PF02065.13|Melibiase[Melibiase]	0	0	0	0	0	0	0	0
PF02100.12|ODC_AZ[Ornithine_decarboxylase_antizyme]	0	0	0	0	0	0	0	0
PF02141.16|DENN[DENN_(AEX-3)_domain]	0	0	0	0	0	0	0	0
PF02170.17|PAZ[PAZ_domain]	0	0	0	0	0	0	0	0
PF02171.12|Piwi[Piwi_domain]	0	0	0	0	0	0	0	0
PF02184.11|HAT[HAT_(Half-A-TPR)_repeat]	0	0	0	0	0	0	0	0
PF02214.17|BTB_2[BTB/POZ_domain]	0	0	0	0	0	0	0	0
PF02254.13|TrkA_N[TrkA-N_domain]	0	0	0	0	0	0	0	0
PF02342.13|TerD[TerD_domain]	0	0	0	0	0	0	0	0
PF02348.14|CTP_transf_3[Cytidylyltransferase]	0	0	0	0	0	0	0	0
PF02458.10|Transferase[Transferase_family]	0	0	0	0	0	0	0	0
PF02480.11|Herpes_gE[Alphaherpesvirus_glycoprotein_E]	0	0	0	0	0	0	0	0
PF02502.13|LacAB_rpiB[Ribose/Galactose_Isomerase]	0	0	0	0	0	0	0	0
PF02515.12|CoA_transf_3[CoA-transferase_family_III]	0	0	0	0	0	0	0	0
PF02541.11|Ppx-GppA[Ppx/GppA_phosphatase_family]	0	0	0	0	0	0	0	0
PF02562.11|PhoH[PhoH-like_protein]	0	0	0	0	0	0	0	0
PF02616.9|ScpA_ScpB[ScpA/B_protein]	0	0	0	0	0	0	0	0
PF02653.11|BPD_transp_2[Branched-chain_amino_acid_transport_system_/_permease_component]	0	0	0	0	0	0	0	0
PF02705.11|K_trans[K+_potassium_transporter]	0	0	0	0	0	0	0	0
PF02744.12|GalP_UDP_tr_C[Galactose-1-phosphate_uridyl_transferase,_C-terminal_domain]	0	0	0	0	0	0	0	0
PF02765.12|POT1[Telomeric_single_stranded_DNA_binding_POT1/CDC13]	0	0	0	0	0	0	0	0
PF02792.9|Mago_nashi[Mago_nashi_protein]	0	0	0	0	0	0	0	0
PF02837.13|Glyco_hydro_2_N[Glycosyl_hydrolases_family_2,_sugar_binding_domain]	0	0	0	0	0	0	0	0
PF02838.10|Glyco_hydro_20b[Glycosyl_hydrolase_family_20,_domain_2]	0	0	0	0	0	0	0	0
PF02870.10|Methyltransf_1N[6-O-methylguanine_DNA_methyltransferase,_ribonuclease-like_domain]	0	0	0	0	0	0	0	0
PF02875.16|Mur_ligase_C[Mur_ligase_family,_glutamate_ligase_domain]	0	0	0	0	0	0	0	0
PF02899.12|Phage_int_SAM_1[Phage_integrase,_N-terminal_SAM-like_domain]	0	0	0	0	0	0	0	0
PF02929.12|Bgal_small_N[Beta_galactosidase_small_chain]	0	0	0	0	0	0	0	0
PF02970.11|TBCA[Tubulin_binding_cofactor_A]	0	0	0	0	0	0	0	0
PF02995.12|DUF229[Protein_of_unknown_function_(DUF229)]	0	0	0	0	0	0	0	0
PF03022.11|MRJP[Major_royal_jelly_protein]	0	0	0	0	0	0	0	0
PF03096.9|Ndr[Ndr_family]	0	0	0	0	0	0	0	0
PF03131.12|bZIP_Maf[bZIP_Maf_transcription_factor]	0	0	0	0	0	0	0	0
PF03141.11|Methyltransf_29[Putative_S-adenosyl-L-methionine-dependent_methyltransferase]	0	0	0	0	0	0	0	0
PF03161.8|LAGLIDADG_2[LAGLIDADG_DNA_endonuclease_family]	0	0	0	0	0	0	0	0
PF03176.10|MMPL[MMPL_family]	0	0	0	0	0	0	0	0
PF03364.15|Polyketide_cyc[Polyketide_cyclase_/_dehydrase_and_lipid_transport]	0	0	0	0	0	0	0	0
PF03417.11|AAT[Acyl-coenzyme_A:6-aminopenicillanic_acid_acyl-transferase]	0	0	0	0	0	0	0	0
PF03427.8|CBM_19[Carbohydrate_binding_domain_(family_19)]	0	0	0	0	0	0	0	0
PF03486.9|HI0933_like[HI0933-like_protein]	0	0	0	0	0	0	0	0
PF03517.8|Voldacs[Regulator_of_volume_decrease_after_cellular_swelling]	0	0	0	0	0	0	0	0
PF03525.9|Meiotic_rec114[Meiotic_recombination_protein_rec114]	0	0	0	0	0	0	0	0
PF03537.8|Glyco_hydro_114[Glycoside-hydrolase_family_GH114]	0	0	0	0	0	0	0	0
PF03575.12|Peptidase_S51[Peptidase_family_S51]	0	0	0	0	0	0	0	0
PF03633.10|Glyco_hydro_65C[Glycosyl_hydrolase_family_65,_C-terminal_domain]	0	0	0	0	0	0	0	0
PF03669.8|UPF0139[Uncharacterised_protein_family_(UPF0139)]	0	0	0	0	0	0	0	0
PF03702.9|UPF0075[Uncharacterised_protein_family_(UPF0075)]	0	0	0	0	0	0	0	0
PF03721.9|UDPG_MGDP_dh_N[UDP-glucose/GDP-mannose_dehydrogenase_family,_NAD_binding_domain]	0	0	0	0	0	0	0	0
PF03730.9|Ku_C[Ku70/Ku80_C-terminal_arm]	0	0	0	0	0	0	0	0
PF03746.11|LamB_YcsF[LamB/YcsF_family]	0	0	0	0	0	0	0	0
PF03796.10|DnaB_C[DnaB-like_helicase_C_terminal_domain]	0	0	0	0	0	0	0	0
PF03845.8|Spore_permease[Spore_germination_protein]	0	0	0	0	0	0	0	0
PF03881.9|Fructosamin_kin[Fructosamine_kinase]	0	0	0	0	0	0	0	0
PF03962.10|Mnd1[Mnd1_family]	0	0	0	0	0	0	0	0
PF03972.9|MmgE_PrpD[MmgE/PrpD_family]	0	0	0	0	0	0	0	0
PF03990.9|DUF348[Domain_of_unknown_function_(DUF348)]	0	0	0	0	0	0	0	0
PF03992.11|ABM[Antibiotic_biosynthesis_monooxygenase]	0	0	0	0	0	0	0	0
PF04120.7|Iron_permease[Low_affinity_iron_permease]	0	0	0	0	0	0	0	0
PF04135.7|Nop10p[Nucleolar_RNA-binding_protein,_Nop10p_family]	0	0	0	0	0	0	0	0
PF04185.9|Phosphoesterase[Phosphoesterase_family]	0	0	0	0	0	0	0	0
PF04268.7|SoxG[Sarcosine_oxidase,_gamma_subunit_family]	0	0	0	0	0	0	0	0
PF04318.7|DUF468[Protein_of_unknown_function_(DUF468)]	0	0	0	0	0	0	0	0
PF04324.10|Fer2_BFD[BFD-like_[2Fe-2S]_binding_domain]	0	0	0	0	0	0	0	0
PF04423.9|Rad50_zn_hook[Rad50_zinc_hook_motif]	0	0	0	0	0	0	0	0
PF04444.9|Dioxygenase_N[Catechol_dioxygenase_N_terminus]	0	0	0	0	0	0	0	0
PF04471.7|Mrr_cat[Restriction_endonuclease]	0	0	0	0	0	0	0	0
PF04601.8|DUF569[Protein_of_unknown_function_(DUF569)]	0	0	0	0	0	0	0	0
PF04641.7|Rtf2[Rtf2_RING-finger]	0	0	0	0	0	0	0	0
PF04648.7|MF_alpha[Yeast_mating_factor_alpha_hormone]	0	0	0	0	0	0	0	0
PF04684.8|BAF1_ABF1[BAF1_/_ABF1_chromatin_reorganising_factor]	0	0	0	0	0	0	0	0
PF04685.8|DUF608[Protein_of_unknown_function,_DUF608]	0	0	0	0	0	0	0	0
PF04750.9|Far-17a_AIG1[FAR-17a/AIG1-like_protein]	0	0	0	0	0	0	0	0
PF04769.7|MAT_Alpha1[Mating-type_protein_MAT_alpha_1]	0	0	0	0	0	0	0	0
PF04828.9|GFA[Glutathione-dependent_formaldehyde-activating_enzyme]	0	0	0	0	0	0	0	0
PF04856.8|Securin[Securin_sister-chromatid_separation_inhibitor]	0	0	0	0	0	0	0	0
PF04864.8|Alliinase_C[Allinase]	0	0	0	0	0	0	0	0
PF04871.8|Uso1_p115_C[Uso1_/_p115_like_vesicle_tethering_protein,_C_terminal_region]	0	0	0	0	0	0	0	0
PF04886.7|PT[PT_repeat]	0	0	0	0	0	0	0	0
PF04930.10|FUN14[FUN14_family]	0	0	0	0	0	0	0	0
PF05032.7|Spo12[Spo12_family]	0	0	0	0	0	0	0	0
PF05049.8|IIGP[Interferon-inducible_GTPase_(IIGP)]	0	0	0	0	0	0	0	0
PF05091.7|eIF-3_zeta[Eukaryotic_translation_initiation_factor_3_subunit_7_(eIF-3)]	0	0	0	0	0	0	0	0
PF05168.9|HEPN[HEPN_domain]	0	0	0	0	0	0	0	0
PF05203.11|Hom_end_hint[Hom_end-associated_Hint]	0	0	0	0	0	0	0	0
PF05204.9|Hom_end[Homing_endonuclease]	0	0	0	0	0	0	0	0
PF05219.7|DREV[DREV_methyltransferase]	0	0	0	0	0	0	0	0
PF05225.11|HTH_psq[helix-turn-helix,_Psq_domain]	0	0	0	0	0	0	0	0
PF05343.9|Peptidase_M42[M42_glutamyl_aminopeptidase]	0	0	0	0	0	0	0	0
PF05391.6|Lsm_interact[Lsm_interaction_motif]	0	0	0	0	0	0	0	0
PF05393.6|Hum_adeno_E3A[Human_adenovirus_early_E3A_glycoprotein]	0	0	0	0	0	0	0	0
PF05422.7|SIN1[Stress-activated_map_kinase_interacting_protein_1_(SIN1)]	0	0	0	0	0	0	0	0
PF05433.10|Rick_17kDa_Anti[Glycine_zipper_2TM_domain]	0	0	0	0	0	0	0	0
PF05436.6|MF_alpha_N[Mating_factor_alpha_precursor_N-terminus]	0	0	0	0	0	0	0	0
PF05445.6|Pox_ser-thr_kin[Poxvirus_serine/threonine_protein_kinase]	0	0	0	0	0	0	0	0
PF05448.7|AXE1[Acetyl_xylan_esterase_(AXE1)]	0	0	0	0	0	0	0	0
PF05451.6|Phytoreo_Pns[Phytoreovirus_nonstructural_protein_Pns10/11]	0	0	0	0	0	0	0	0
PF05476.6|PET122[PET122]	0	0	0	0	0	0	0	0
PF05502.8|Dynactin_p62[Dynactin_p62_family]	0	0	0	0	0	0	0	0
PF05615.8|THOC7[Tho_complex_subunit_7]	0	0	0	0	0	0	0	0
PF05664.6|DUF810[Protein_of_unknown_function_(DUF810)]	0	0	0	0	0	0	0	0
PF05672.6|MAP7[MAP7_(E-MAP-115)_family]	0	0	0	0	0	0	0	0
PF05677.7|DUF818[Chlamydia_CHLPS_protein_(DUF818)]	0	0	0	0	0	0	0	0
PF05704.7|Caps_synth[Capsular_polysaccharide_synthesis_protein]	0	0	0	0	0	0	0	0
PF05706.7|CDKN3[Cyclin-dependent_kinase_inhibitor_3_(CDKN3)]	0	0	0	0	0	0	0	0
PF05707.7|Zot[Zonular_occludens_toxin_(Zot)]	0	0	0	0	0	0	0	0
PF05725.7|FNIP[FNIP_Repeat]	0	0	0	0	0	0	0	0
PF05783.6|DLIC[Dynein_light_intermediate_chain_(DLIC)]	0	0	0	0	0	0	0	0
PF05870.6|PA_decarbox[Phenolic_acid_decarboxylase_(PAD)]	0	0	0	0	0	0	0	0
PF05935.6|Arylsulfotrans[Arylsulfotransferase_(ASST)]	0	0	0	0	0	0	0	0
PF05971.7|Methyltransf_10[Protein_of_unknown_function_(DUF890)]	0	0	0	0	0	0	0	0
PF05990.7|DUF900[Alpha/beta_hydrolase_of_unknown_function_(DUF900)]	0	0	0	0	0	0	0	0
PF06032.7|DUF917[Protein_of_unknown_function_(DUF917)]	0	0	0	0	0	0	0	0
PF06039.10|Mqo[Malate:quinone_oxidoreductase_(Mqo)]	0	0	0	0	0	0	0	0
PF06131.6|DUF963[Schizosaccharomyces_pombe_repeat_of_unknown_function_(DUF963)]	0	0	0	0	0	0	0	0
PF06176.6|WaaY[Lipopolysaccharide_core_biosynthesis_protein_(WaaY)]	0	0	0	0	0	0	0	0
PF06213.7|CobT[Cobalamin_biosynthesis_protein_CobT]	0	0	0	0	0	0	0	0
PF06331.7|Tbf5[Transcription_factor_TFIIH_complex_subunit_Tfb5]	0	0	0	0	0	0	0	0
PF06414.7|Zeta_toxin[Zeta_toxin]	0	0	0	0	0	0	0	0
PF06455.6|NADH5_C[NADH_dehydrogenase_subunit_5_C-terminus]	0	0	0	0	0	0	0	0
PF06464.6|DMAP_binding[DMAP1-binding_Domain]	0	0	0	0	0	0	0	0
PF06480.10|FtsH_ext[FtsH_Extracellular]	0	0	0	0	0	0	0	0
PF06500.6|DUF1100[Alpha/beta_hydrolase_of_unknown_function_(DUF1100)]	0	0	0	0	0	0	0	0
PF06516.6|NUP[Purine_nucleoside_permease_(NUP)]	0	0	0	0	0	0	0	0
PF06662.8|C5-epim_C[D-glucuronyl_C5-epimerase_C-terminus]	0	0	0	0	0	0	0	0
PF06775.9|Seipin[Putative_adipose-regulatory_protein_(Seipin)]	0	0	0	0	0	0	0	0
PF06963.7|FPN1[Ferroportin1_(FPN1)]	0	0	0	0	0	0	0	0
PF06964.7|Alpha-L-AF_C[Alpha-L-arabinofuranosidase_C-terminus]	0	0	0	0	0	0	0	0
PF06977.6|SdiA-regulated[SdiA-regulated]	0	0	0	0	0	0	0	0
PF07019.7|Rab5ip[Rab5-interacting_protein_(Rab5ip)]	0	0	0	0	0	0	0	0
PF07021.7|MetW[Methionine_biosynthesis_protein_MetW]	0	0	0	0	0	0	0	0
PF07061.6|Swi5[Swi5]	0	0	0	0	0	0	0	0
PF07081.6|DUF1349[Protein_of_unknown_function_(DUF1349)]	0	0	0	0	0	0	0	0
PF07093.6|SGT1[SGT1_protein]	0	0	0	0	0	0	0	0
PF07106.8|TBPIP[Tat_binding_protein_1(TBP-1)-interacting_protein_(TBPIP)]	0	0	0	0	0	0	0	0
PF07171.7|MlrC_C[MlrC_C-terminus]	0	0	0	0	0	0	0	0
PF07200.8|Mod_r[Modifier_of_rudimentary_(Mod(r))_protein]	0	0	0	0	0	0	0	0
PF07263.6|DMP1[Dentin_matrix_protein_1_(DMP1)]	0	0	0	0	0	0	0	0
PF07286.7|DUF1445[Protein_of_unknown_function_(DUF1445)]	0	0	0	0	0	0	0	0
PF07298.6|NnrU[NnrU_protein]	0	0	0	0	0	0	0	0
PF07364.7|DUF1485[Protein_of_unknown_function_(DUF1485)]	0	0	0	0	0	0	0	0
PF07366.7|SnoaL[SnoaL-like_polyketide_cyclase]	0	0	0	0	0	0	0	0
PF07377.7|DUF1493[Protein_of_unknown_function_(DUF1493)]	0	0	0	0	0	0	0	0
PF07470.8|Glyco_hydro_88[Glycosyl_Hydrolase_Family_88]	0	0	0	0	0	0	0	0
PF07519.6|Tannase[Tannase_and_feruloyl_esterase]	0	0	0	0	0	0	0	0
PF07557.6|Shugoshin_C[Shugoshin_C_terminus]	0	0	0	0	0	0	0	0
PF07558.6|Shugoshin_N[Shugoshin_N-terminal_coiled-coil_region]	0	0	0	0	0	0	0	0
PF07632.6|DUF1593[Protein_of_unknown_function_(DUF1593)]	0	0	0	0	0	0	0	0
PF07721.9|TPR_4[Tetratricopeptide_repeat]	0	0	0	0	0	0	0	0
PF07740.7|Toxin_12[Ion_channel_inhibitory_toxin]	0	0	0	0	0	0	0	0
PF07842.7|GCFC[GC-rich_sequence_DNA-binding_factor-like_protein]	0	0	0	0	0	0	0	0
PF07912.8|ERp29_N[ERp29,_N-terminal_domain]	0	0	0	0	0	0	0	0
PF07914.6|DUF1679[Protein_of_unknown_function_(DUF1679)]	0	0	0	0	0	0	0	0
PF07926.7|TPR_MLP1_2[TPR/MLP1/MLP2-like_protein]	0	0	0	0	0	0	0	0
PF07931.7|CPT[Chloramphenicol_phosphotransferase-like_protein]	0	0	0	0	0	0	0	0
PF07944.7|DUF1680[Putative_glycosyl_hydrolase_of_unknown_function_(DUF1680)]	0	0	0	0	0	0	0	0
PF07958.6|DUF1688[Protein_of_unknown_function_(DUF1688)]	0	0	0	0	0	0	0	0
PF07964.6|Red1[Rec10_/_Red1]	0	0	0	0	0	0	0	0
PF07971.7|Glyco_hydro_92[Glycosyl_hydrolase_family_92]	0	0	0	0	0	0	0	0
PF07976.7|Phe_hydrox_dim[Phenol_hydroxylase,_C-terminal_dimerisation_domain]	0	0	0	0	0	0	0	0
PF07989.6|Microtub_assoc[Microtubule_associated]	0	0	0	0	0	0	0	0
PF08020.6|DUF1706[Protein_of_unknown_function_(DUF1706)]	0	0	0	0	0	0	0	0
PF08125.8|Mannitol_dh_C[Mannitol_dehydrogenase_C-terminal_domain]	0	0	0	0	0	0	0	0
PF08212.7|Lipocalin_2[Lipocalin-like_domain]	0	0	0	0	0	0	0	0
PF08239.6|SH3_3[Bacterial_SH3_domain]	0	0	0	0	0	0	0	0
PF08252.6|Leader_CPA1[arg-2/CPA1_leader_peptide]	0	0	0	0	0	0	0	0
PF08315.7|cwf18[cwf18_pre-mRNA_splicing_factor]	0	0	0	0	0	0	0	0
PF08424.5|NRDE-2[NRDE-2,_necessary_for_RNA_interference]	0	0	0	0	0	0	0	0
PF08505.5|MMR1[Mitochondrial_Myo2_receptor-related_protein]	0	0	0	0	0	0	0	0
PF08509.6|Ad_cyc_g-alpha[Adenylate_cyclase_G-alpha_binding_domain]	0	0	0	0	0	0	0	0
PF08528.6|Whi5[Whi5_like]	0	0	0	0	0	0	0	0
PF08530.5|PepX_C[X-Pro_dipeptidyl-peptidase_C-terminal_non-catalytic_domain]	0	0	0	0	0	0	0	0
PF08537.5|NBP1[Fungal_Nap_binding_protein_NBP1]	0	0	0	0	0	0	0	0
PF08539.6|HbrB[HbrB-like]	0	0	0	0	0	0	0	0
PF08571.5|Yos1[Yos1-like]	0	0	0	0	0	0	0	0
PF08584.6|Ribonuc_P_40[Ribonuclease_P_40kDa_(Rpp40)_subunit]	0	0	0	0	0	0	0	0
PF08586.5|Rsc14[RSC_complex,_Rsc14/Ldb7_subunit]	0	0	0	0	0	0	0	0
PF08592.6|DUF1772[Domain_of_unknown_function_(DUF1772)]	0	0	0	0	0	0	0	0
PF08593.5|MUG2_C[Meiotically_up-regulated_glycoproteins_C-terminal]	0	0	0	0	0	0	0	0
PF08631.5|SPO22[Meiosis_protein_SPO22/ZIP4_like]	0	0	0	0	0	0	0	0
PF08648.7|DUF1777[Protein_of_unknown_function_(DUF1777)]	0	0	0	0	0	0	0	0
PF08672.6|APC2[Anaphase_promoting_complex_(APC)_subunit_2]	0	0	0	0	0	0	0	0
PF08691.5|Nse5[DNA_repair_proteins_Nse5_and_Nse6]	0	0	0	0	0	0	0	0
PF08692.5|Pet20[Mitochondrial_protein_Pet20]	0	0	0	0	0	0	0	0
PF08693.5|SKG6[Transmembrane_alpha-helix_domain]	0	0	0	0	0	0	0	0
PF08699.5|DUF1785[Domain_of_unknown_function_(DUF1785)]	0	0	0	0	0	0	0	0
PF08777.6|RRM_3[RNA_binding_motif]	0	0	0	0	0	0	0	0
PF08803.6|ydhR[Putative_mono-oxygenase_ydhR]	0	0	0	0	0	0	0	0
PF08839.6|CDT1[DNA_replication_factor_CDT1_like]	0	0	0	0	0	0	0	0
PF08880.6|QLQ[QLQ]	0	0	0	0	0	0	0	0
PF08952.6|DUF1866[Domain_of_unknown_function_(DUF1866)]	0	0	0	0	0	0	0	0
PF08969.6|USP8_dimer[USP8_dimerisation_domain]	0	0	0	0	0	0	0	0
PF08997.5|UCR_6-4kD[Ubiquinol-cytochrome_C_reductase_complex,_6.4kD_protein]	0	0	0	0	0	0	0	0
PF09074.5|Mer2[Mer2]	0	0	0	0	0	0	0	0
PF09145.5|Ubiq-assoc[Ubiquitin-associated]	0	0	0	0	0	0	0	0
PF09201.5|SRX[SRX]	0	0	0	0	0	0	0	0
PF09220.5|LA-virus_coat[L-A_virus,_major_coat_protein]	0	0	0	0	0	0	0	0
PF09235.5|Ste50p-SAM[Ste50p,_sterile_alpha_motif]	0	0	0	0	0	0	0	0
PF09279.6|EF-hand_like[Phosphoinositide-specific_phospholipase_C,_efhand-like]	0	0	0	0	0	0	0	0
PF09351.5|DUF1993[Domain_of_unknown_function_(DUF1993)]	0	0	0	0	0	0	0	0
PF09418.5|DUF2009[Protein_of_unknown_function_(DUF2009)]	0	0	0	0	0	0	0	0
PF09423.5|PhoD[PhoD-like_phosphatase]	0	0	0	0	0	0	0	0
PF09426.5|Nyv1_N[Vacuolar_R-SNARE_Nyv1_N_terminal]	0	0	0	0	0	0	0	0
PF09430.5|DUF2012[Protein_of_unknown_function_(DUF2012)]	0	0	0	0	0	0	0	0
PF09432.5|THP2[Tho_complex_subunit_THP2]	0	0	0	0	0	0	0	0
PF09440.5|eIF3_N[eIF3_subunit_6_N_terminal_domain]	0	0	0	0	0	0	0	0
PF09447.5|Cnl2_NKP2[Cnl2/NKP2_family_protein]	0	0	0	0	0	0	0	0
PF09452.5|Mvb12[ESCRT-I_subunit_Mvb12]	0	0	0	0	0	0	0	0
PF09486.5|HrpB7[Bacterial_type_III_secretion_protein_(HrpB7)]	0	0	0	0	0	0	0	0
PF09510.5|Rtt102p[Rtt102p-like_transcription_regulator_protein]	0	0	0	0	0	0	0	0
PF09749.4|HVSL[Uncharacterised_conserved_protein]	0	0	0	0	0	0	0	0
PF09795.4|Atg31[Autophagy-related_protein_31]	0	0	0	0	0	0	0	0
PF09807.4|DUF2348[Uncharacterized_conserved_protein_(DUF2348)]	0	0	0	0	0	0	0	0
PF09986.4|DUF2225[Uncharacterized_protein_conserved_in_bacteria_(DUF2225)]	0	0	0	0	0	0	0	0
PF10000.4|ACT_3[ACT_domain]	0	0	0	0	0	0	0	0
PF10022.4|DUF2264[Uncharacterized_protein_conserved_in_bacteria_(DUF2264)]	0	0	0	0	0	0	0	0
PF10165.4|Ric8[Guanine_nucleotide_exchange_factor_synembryn]	0	0	0	0	0	0	0	0
PF10183.4|ESSS[ESSS_subunit_of_NADH:ubiquinone_oxidoreductase_(complex_I)]	0	0	0	0	0	0	0	0
PF10187.4|Nefa_Nip30_N[N-terminal_domain_of_NEFA-interacting_nuclear_protein_NIP30]	0	0	0	0	0	0	0	0
PF10199.4|Adaptin_binding[Alpha_and_gamma_adaptin_binding_protein_p34]	0	0	0	0	0	0	0	0
PF10243.4|MIP-T3[Microtubule-binding_protein_MIP-T3]	0	0	0	0	0	0	0	0
PF10281.4|Ish1[Putative_stress-responsive_nuclear_envelope_protein]	0	0	0	0	0	0	0	0
PF10307.4|DUF2410[Hypothetical_protein_(DUF2410)]	0	0	0	0	0	0	0	0
PF10336.4|DUF2420[Protein_of_unknown_function_(DUF2420)]	0	0	0	0	0	0	0	0
PF10339.4|Vel1p[Yeast-specific_zinc_responsive]	0	0	0	0	0	0	0	0
PF10376.4|Mei5[Double-strand_recombination_repair_protein]	0	0	0	0	0	0	0	0
PF10378.4|RRM[Putative_RRM_domain]	0	0	0	0	0	0	0	0
PF10422.4|LRS4[Monopolin_complex_subunit_LRS4]	0	0	0	0	0	0	0	0
PF10434.4|MAM1[Monopolin_complex_protein_MAM1]	0	0	0	0	0	0	0	0
PF10437.4|Lip_prot_lig_C[Bacterial_lipoate_protein_ligase_C-terminus]	0	0	0	0	0	0	0	0
PF10444.4|Nbl1_Borealin_N[Nbl1_/_Borealin_N_terminal]	0	0	0	0	0	0	0	0
PF10445.4|DUF2456[Protein_of_unknown_function_(DUF2456)]	0	0	0	0	0	0	0	0
PF10466.4|Inhibitor_I34[Saccharopepsin_inhibitor_I34]	0	0	0	0	0	0	0	0
PF10502.4|Peptidase_S26[Signal_peptidase,_peptidase_S26]	0	0	0	0	0	0	0	0
PF10509.4|GalKase_gal_bdg[Galactokinase_galactose-binding_signature]	0	0	0	0	0	0	0	0
PF10567.4|Nab6_mRNP_bdg[RNA-recognition_motif]	0	0	0	0	0	0	0	0
PF10591.4|SPARC_Ca_bdg[Secreted_protein_acidic_and_rich_in_cysteine_Ca_binding_region]	0	0	0	0	0	0	0	0
PF10595.4|UPF0564[Uncharacterised_protein_family_UPF0564]	0	0	0	0	0	0	0	0
PF10599.4|Nup_retrotrp_bd[Retro-transposon_transporting_motif]	0	0	0	0	0	0	0	0
PF10604.4|Polyketide_cyc2[Polyketide_cyclase_/_dehydrase_and_lipid_transport]	0	0	0	0	0	0	0	0
PF10638.4|Sfi1_C[Spindle_body_associated_protein_C-terminus]	0	0	0	0	0	0	0	0
PF10642.4|Tom5[Mitochondrial_import_receptor_subunit_or_translocase]	0	0	0	0	0	0	0	0
PF10712.4|NAD-GH[NAD-specific_glutamate_dehydrogenase]	0	0	0	0	0	0	0	0
PF10815.3|ComZ[ComZ]	0	0	0	0	0	0	0	0
PF11001.3|DUF2841[Protein_of_unknown_function_(DUF2841)]	0	0	0	0	0	0	0	0
PF11175.3|DUF2961[Protein_of_unknown_function_(DUF2961)]	0	0	0	0	0	0	0	0
PF11435.3|She2p[RNA_binding_protein_She2p]	0	0	0	0	0	0	0	0
PF11464.3|Rbsn[Rabenosyn_Rab_binding_domain]	0	0	0	0	0	0	0	0
PF11489.3|DUF3210[Protein_of_unknown_function_(DUF3210)]	0	0	0	0	0	0	0	0
PF11503.3|DUF3215[Protein_of_unknown_function_(DUF3215)]	0	0	0	0	0	0	0	0
PF11517.3|Nab2[Nuclear_abundant_poly(A)_RNA-bind_protein_2_(Nab2)]	0	0	0	0	0	0	0	0
PF11542.3|Mdv1[Mitochondrial_division_protein_1]	0	0	0	0	0	0	0	0
PF11544.3|Spc42p[Spindle_pole_body_component_Spc42p]	0	0	0	0	0	0	0	0
PF11549.3|Sec31[Protein_transport_protein_SEC31]	0	0	0	0	0	0	0	0
PF11566.3|PI31_Prot_N[PI31_proteasome_regulator_N-terminal]	0	0	0	0	0	0	0	0
PF11593.3|Med3[Mediator_complex_subunit_3_fungal]	0	0	0	0	0	0	0	0
PF11596.3|DUF3246[Protein_of_unknown_function_(DUF3246)]	0	0	0	0	0	0	0	0
PF11603.3|Sir1[Regulatory_protein_Sir1]	0	0	0	0	0	0	0	0
PF11608.3|Limkain-b1[Limkain_b1]	0	0	0	0	0	0	0	0
PF11610.3|Ste5[Scaffold_protein_Ste5-Fus5_binding_region]	0	0	0	0	0	0	0	0
PF11615.3|DUF3249[Protein_of_unknown_function_(DUF3249)]	0	0	0	0	0	0	0	0
PF11654.3|DUF2665[Protein_of_unknown_function_(DUF2665)]	0	0	0	0	0	0	0	0
PF11744.3|ALMT[Aluminium_activated_malate_transporter]	0	0	0	0	0	0	0	0
PF11779.3|DUF3317[Protein_of_unknown_function_(DUF3317)]	0	0	0	0	0	0	0	0
PF11785.3|Aft1_OSA[Aft1_osmotic_stress_response_(OSM)_domain]	0	0	0	0	0	0	0	0
PF11831.3|Myb_Cef[pre-mRNA_splicing_factor_component]	0	0	0	0	0	0	0	0
PF11957.3|efThoc1[THO_complex_subunit_1_transcription_elongation_factor]	0	0	0	0	0	0	0	0
PF11960.3|DUF3474[Domain_of_unknown_function_(DUF3474)]	0	0	0	0	0	0	0	0
PF11988.3|Dsl1_N[Retrograde_transport_protein_Dsl1_N_terminal]	0	0	0	0	0	0	0	0
PF12068.3|DUF3548[Domain_of_unknown_function_(DUF3548)]	0	0	0	0	0	0	0	0
PF12106.3|Colicin_C[Colicin_C_terminal_ribonuclease_domain]	0	0	0	0	0	0	0	0
PF12147.3|Methyltransf_20[Putative_methyltransferase]	0	0	0	0	0	0	0	0
PF12187.3|VirArc_Nuclease[Viral/Archaeal_nuclease]	0	0	0	0	0	0	0	0
PF12194.3|Ste5_C[Protein_kinase_Fus3-binding]	0	0	0	0	0	0	0	0
PF12330.3|DUF3635[Domain_of_unknown_function_(DUF3635)]	0	0	0	0	0	0	0	0
PF12341.3|DUF3639[Protein_of_unknown_function_(DUF3639)]	0	0	0	0	0	0	0	0
PF12384.3|Peptidase_A2B[Ty3_transposon_peptidase]	0	0	0	0	0	0	0	0
PF12387.3|Peptidase_C74[Pestivirus_NS2_peptidase]	0	0	0	0	0	0	0	0
PF12396.3|DUF3659[Protein_of_unknown_function_(DUF3659)]	0	0	0	0	0	0	0	0
PF12471.3|GTP_CH_N[GTP_cyclohydrolase_N_terminal]	0	0	0	0	0	0	0	0
PF12479.3|DUF3698[Protein_of_unknown_function_(DUF3698)]	0	0	0	0	0	0	0	0
PF12505.3|DUF3712[Protein_of_unknown_function_(DUF3712)]	0	0	0	0	0	0	0	0
PF12554.3|MOZART1[Mitotic-spindle_organizing_gamma-tubulin_ring_associated]	0	0	0	0	0	0	0	0
PF12585.3|DUF3759[Protein_of_unknown_function_(DUF3759)]	0	0	0	0	0	0	0	0
PF12605.3|CK1gamma_C[Casein_kinase_1_gamma_C_terminal]	0	0	0	0	0	0	0	0
PF12612.3|TFCD_C[Tubulin_folding_cofactor_D_C_terminal]	0	0	0	0	0	0	0	0
PF12657.2|TFIIIC_delta[Transcription_factor_IIIC_subunit_delta_N-term]	0	0	0	0	0	0	0	0
PF12659.2|Stn1_C[Telomere_capping_C-terminal_wHTH]	0	0	0	0	0	0	0	0
PF12661.2|hEGF[Human_growth_factor-like_EGF]	0	0	0	0	0	0	0	0
PF12680.2|SnoaL_2[SnoaL-like_domain]	0	0	0	0	0	0	0	0
PF12705.2|PDDEXK_1[PD-(D/E)XK_nuclease_superfamily]	0	0	0	0	0	0	0	0
PF12709.2|Kinetocho_Slk19[Central_kinetochore-associated]	0	0	0	0	0	0	0	0
PF12742.2|Gryzun-like[Gryzun,_putative_Golgi_trafficking]	0	0	0	0	0	0	0	0
PF12744.2|ATG19_autophagy[Autophagy_protein_Atg19,_Atg8-binding]	0	0	0	0	0	0	0	0
PF12765.2|Cohesin_HEAT[HEAT_repeat_associated_with_sister_chromatid_cohesion]	0	0	0	0	0	0	0	0
PF12808.2|Mto2_bdg[Micro-tubular_organiser_Mto1_C-term_Mto2-binding_region]	0	0	0	0	0	0	0	0
PF12815.2|CTD[Spt5_C-terminal_nonapeptide_repeat_binding_Spt4]	0	0	0	0	0	0	0	0
PF12844.2|HTH_19[Helix-turn-helix_domain]	0	0	0	0	0	0	0	0
PF12927.2|DUF3835[Domain_of_unknown_function_(DUF3835)]	0	0	0	0	0	0	0	0
PF12935.2|Sec16_N[Vesicle_coat_trafficking_protein_Sec16_N-terminus]	0	0	0	0	0	0	0	0
PF13013.1|F-box-like_2[F-box-like_domain]	0	0	0	0	0	0	0	0
PF13092.1|CENP-L[Kinetochore_complex_Sim4_subunit_Fta1]	0	0	0	0	0	0	0	0
PF13097.1|CENP-U[CENP-A_nucleosome_associated_complex_(NAC)_subunit]	0	0	0	0	0	0	0	0
PF13175.1|AAA_15[AAA_ATPase_domain]	0	0	0	0	0	0	0	0
PF13189.1|Cytidylate_kin2[Cytidylate_kinase-like_family]	0	0	0	0	0	0	0	0
PF13306.1|LRR_5[Leucine_rich_repeats_(6_copies)]	0	0	0	0	0	0	0	0
PF13324.1|GCIP[Grap2_and_cyclin-D-interacting]	0	0	0	0	0	0	0	0
PF13335.1|Mg_chelatase_2[Magnesium_chelatase,_subunit_ChlI]	0	0	0	0	0	0	0	0
PF13358.1|DDE_3[DDE_superfamily_endonuclease]	0	0	0	0	0	0	0	0
PF13360.1|PQQ_2[PQQ-like_domain]	0	0	0	0	0	0	0	0
PF13379.1|NMT1_2[NMT1-like_family]	0	0	0	0	0	0	0	0
PF13384.1|HTH_23[Homeodomain-like_domain]	0	0	0	0	0	0	0	0
PF13421.1|Band_7_1[SPFH_domain-Band_7_family]	0	0	0	0	0	0	0	0
PF13429.1|TPR_15[Tetratricopeptide_repeat]	0	0	0	0	0	0	0	0
PF13440.1|Polysacc_synt_3[Polysaccharide_biosynthesis_protein]	0	0	0	0	0	0	0	0
PF13445.1|zf-RING_UBOX[RING-type_zinc-finger]	0	0	0	0	0	0	0	0
PF13482.1|RNase_H_2[RNase_H_superfamily]	0	0	0	0	0	0	0	0
PF13500.1|AAA_26[AAA_domain]	0	0	0	0	0	0	0	0
PF13518.1|HTH_28[Helix-turn-helix_domain]	0	0	0	0	0	0	0	0
PF13523.1|Acetyltransf_8[Acetyltransferase_(GNAT)_domain]	0	0	0	0	0	0	0	0
PF13524.1|Glyco_trans_1_2[Glycosyl_transferases_group_1]	0	0	0	0	0	0	0	0
PF13527.1|Acetyltransf_9[Acetyltransferase_(GNAT)_domain]	0	0	0	0	0	0	0	0
PF13541.1|ChlI[Subunit_ChlI_of_Mg-chelatase]	0	0	0	0	0	0	0	0
PF13551.1|HTH_29[Winged_helix-turn_helix]	0	0	0	0	0	0	0	0
PF13577.1|SnoaL_4[SnoaL-like_domain]	0	0	0	0	0	0	0	0
PF13587.1|DJ-1_PfpI_N[N-terminal_domain_of_DJ-1_PfpI_family]	0	0	0	0	0	0	0	0
PF13631.1|Cytochrom_B_N_2[Cytochrome_b(N-terminal)/b6/petB]	0	0	0	0	0	0	0	0
PF13668.1|Ferritin_2[Ferritin-like_domain]	0	0	0	0	0	0	0	0
PF13679.1|Methyltransf_32[Methyltransferase_domain]	0	0	0	0	0	0	0	0
PF13694.1|Hph[Sec63/Sec62_complex-interacting_family]	0	0	0	0	0	0	0	0
PF13710.1|ACT_5[ACT_domain]	0	0	0	0	0	0	0	0
PF13728.1|TraF[F_plasmid_transfer_operon_protein]	0	0	0	0	0	0	0	0
PF13735.1|tRNA_NucTran2_2[tRNA_nucleotidyltransferase_domain_2_putative]	0	0	0	0	0	0	0	0
PF13758.1|Prefoldin_3[Prefoldin_subunit]	0	0	0	0	0	0	0	0
PF13779.1|DUF4175[Domain_of_unknown_function_(DUF4175)]	0	0	0	0	0	0	0	0
PF13806.1|Rieske_2[Rieske-like_[2Fe-2S]_domain]	0	0	0	0	0	0	0	0
PF13813.1|MBOAT_2[Membrane_bound_O-acyl_transferase_family]	0	0	0	0	0	0	0	0
PF13820.1|Nucleic_acid_bd[Putative_nucleic_acid-binding_region]	0	0	0	0	0	0	0	0
PF13823.1|ADH_N_assoc[Alcohol_dehydrogenase_GroES-associated]	0	0	0	0	0	0	0	0
PF13837.1|Myb_DNA-bind_4[Myb/SANT-like_DNA-binding_domain]	0	0	0	0	0	0	0	0
PF13851.1|GAS[Growth-arrest_specific_micro-tubule_binding]	0	0	0	0	0	0	0	0
PF13881.1|Rad60-SLD_2[Ubiquitin-2_like_Rad60_SUMO-like]	0	0	0	0	0	0	0	0
PF13883.1|Pyrid_oxidase_2[Pyridoxamine_5'-phosphate_oxidase]	0	0	0	0	0	0	0	0
PF13885.1|Keratin_B2_2[Keratin,_high_sulfur_B2_protein]	0	0	0	0	0	0	0	0
PF13929.1|mRNA_stabil[mRNA_stabilisation]	0	0	0	0	0	0	0	0
PF13945.1|NST1[Salt_tolerance_down-regulator]	0	0	0	0	0	0	0	0
PF13950.1|Epimerase_Csub[UDP-glucose_4-epimerase_C-term_subunit]	0	0	0	0	0	0	0	0
PF13971.1|Mei4[Meiosis-specific_protein_Mei4]	0	0	0	0	0	0	0	0
PF13976.1|gag_pre-integrs[GAG-pre-integrase_domain]	0	0	0	0	0	0	0	0
PF14008.1|Metallophos_C[Iron/zinc_purple_acid_phosphatase-like_protein_C]	0	0	0	0	0	0	0	0
PF14078.1|DUF4259[Domain_of_unknown_function_(DUF4259)]	0	0	0	0	0	0	0	0
PF14269.1|Arylsulfotran_2[Arylsulfotransferase_(ASST)]	0	0	0	0	0	0	0	0
PF14477.1|Mso1_C[Membrane-polarising_domain_of_Mso1]	0	0	0	0	0	0	0	0
PF14482.1|Cut8_N[Cut8_proteasome-binding_domain]	0	0	0	0	0	0	0	0
PF14528.1|LAGLIDADG_3[LAGLIDADG-like_domain]	0	0	0	0	0	0	0	0
PF14529.1|Exo_endo_phos_2[Endonuclease-reverse_transcriptase]	0	0	0	0	0	0	0	0
PF14532.1|Sigma54_activ_2[Sigma-54_interaction_domain]	0	0	0	0	0	0	0	0
PF14541.1|TAXi_C[Xylanase_inhibitor_C-terminal]	0	0	0	0	0	0	0	0
PF14605.1|Nup35_RRM_2[Nup53/35/40-type_RNA_recognition_motif]	0	0	0	0	0	0	0	0
PF14608.1|zf-CCCH_2[Zinc_finger_C-x8-C-x5-C-x3-H_type]	0	0	0	0	0	0	0	0
PF14716.1|HHH_8[Helix-hairpin-helix_domain]	0	0	0	0	0	0	0	0
PF14732.1|UAE_UbL[Ubiquitin/SUMO-activating_enzyme_ubiquitin-like_domain]	0	0	0	0	0	0	0	0
PF14788.1|EF-hand_10[EF_hand]	0	0	0	0	0	0	0	0
PF14791.1|DNA_pol_B_thumb[DNA_polymerase_beta_thumb]	0	0	0	0	0	0	0	0
PF14792.1|DNA_pol_B_palm[DNA_polymerase_beta_palm]	0	0	0	0	0	0	0	0
PF14845.1|Glycohydro_20b2[beta-acetyl_hexosaminidase_like]	0	0	0	0	0	0	0	0
PF14863.1|Alkyl_sulf_dimr[Alkyl_sulfatase_dimerisation]	0	0	0	0	0	0	0	0
PF14864.1|Alkyl_sulf_C[Alkyl_sulfatase_C-terminal]	0	0	0	0	0	0	0	0
PF14876.1|RSF[Respiratory_growth_transcriptional_regulator]	0	0	0	0	0	0	0	0
PF14968.1|CCDC84[Coiled_coil_protein_84]	0	0	0	0	0	0	0	0
PF15271.1|BBP1_N[Spindle_pole_body_component_BBP1,_Mps2-binding_protein]	0	0	0	0	0	0	0	0
PF15272.1|BBP1_C[Spindle_pole_body_component_BBP1,_C-terminal]	0	0	0	0	0	0	0	0
PF15365.1|PNRC[Proline-rich_nuclear_receptor_coactivator]	0	0	0	0	0	0	0	0
PF15458.1|NTR2[Nineteen_complex-related_protein_2]	0	0	0	0	0	0	0	0
PF15463.1|ECM11[Extracellular_mutant_protein_11]	0	0	0	0	0	0	0	0
PF15612.1|WHIM1[WSTF,_HB1,_Itc1p,_MBD9_motif_1]	0	0	0	0	0	0	0	0
PF15614.1|WHIM3[WSTF,_HB1,_Itc1p,_MBD9_motif_3]	0	0	0	0	0	0	0	0
TIGR00003[TIGR00003:_copper_ion_binding_protein]	0	0	0	0	0	0	0	0
TIGR00004[TIGR00004:_reactive_intermediate/imine_deaminase]	0	0	0	0	0	0	0	0
TIGR00005[rluA_subfam:_pseudouridine_synthase,_RluA_family]	0	0	0	0	0	0	0	0
TIGR00040[yfcE:_phosphodiesterase,_MJ0936_family]	0	0	0	0	0	0	0	0
TIGR00049[TIGR00049:_iron-sulfur_cluster_assembly_accessory_protein]	0	0	0	0	0	0	0	0
TIGR00059[L17:_ribosomal_protein_L17]	0	0	0	0	0	0	0	0
TIGR00094[tRNA_TruD_broad:_tRNA_pseudouridine_synthase,_TruD_family]	0	0	0	0	0	0	0	0
TIGR00121[birA_ligase:_biotin--[acetyl-CoA-carboxylase]_ligase]	0	0	0	0	0	0	0	0
TIGR00125[cyt_tran_rel:_cytidyltransferase-like_domain]	0	0	0	0	0	0	0	0
TIGR00131[gal_kin:_galactokinase]	0	0	0	0	0	0	0	0
TIGR00132[gatA:_aspartyl/glutamyl-tRNA(Asn/Gln)_amidotransferase,_A_subunit]	0	0	0	0	0	0	0	0
TIGR00145[TIGR00145:_FTR1_family_protein]	0	0	0	0	0	0	0	0
TIGR00148[TIGR00148:_UbiD_family_decarboxylase]	0	0	0	0	0	0	0	0
TIGR00165[S18:_ribosomal_protein_S18]	0	0	0	0	0	0	0	0
TIGR00167[cbbA:_ketose-bisphosphate_aldolase]	0	0	0	0	0	0	0	0
TIGR00167|TIGR01520[FruBisAldo_II_A:_fructose-bisphosphate_aldolase,_class_II]	0	0	0	0	0	0	0	0
TIGR00171|TIGR00170[leuC:_3-isopropylmalate_dehydratase,_large_subunit]	0	0	0	0	0	0	0	0
TIGR00189[tesB:_acyl-CoA_thioesterase_II]	0	0	0	0	0	0	0	0
TIGR00209[galT_1:_galactose-1-phosphate_uridylyltransferase]	0	0	0	0	0	0	0	0
TIGR00227[ribD_Cterm:_riboflavin-specific_deaminase_C-terminal_domain]	0	0	0	0	0	0	0	0
TIGR00229[sensory_box:_PAS_domain_S-box_protein]	0	0	0	0	0	0	0	0
TIGR00231[small_GTP:_small_GTP-binding_protein_domain]	0	0	0	0	0	0	0	0
TIGR00231|TIGR00450[mnmE_trmE_thdF:_tRNA_modification_GTPase_TrmE]	0	0	0	0	0	0	0	0
TIGR00231|TIGR00484[EF-G:_translation_elongation_factor_G]	0	0	0	0	0	0	0	0
TIGR00231|TIGR00485[EF-Tu:_translation_elongation_factor_Tu]	0	0	0	0	0	0	0	0
TIGR00231|TIGR00487[IF-2:_translation_initiation_factor_IF-2]	0	0	0	0	0	0	0	0
TIGR00231|TIGR01393[lepA:_GTP-binding_protein_LepA]	0	0	0	0	0	0	0	0
TIGR00231|TIGR01657[P-ATPase-V:_P-type_ATPase_of_unknown_pump_specificity_(type_V)]	0	0	0	0	0	0	0	0
TIGR00262|TIGR00263[trpB:_tryptophan_synthase,_beta_subunit]	0	0	0	0	0	0	0	0
TIGR00269[TIGR00269:_TIGR00269_family_protein]	0	0	0	0	0	0	0	0
TIGR00290[MJ0570_dom:_MJ0570-related_uncharacterized_domain]	0	0	0	0	0	0	0	0
TIGR00309[V_ATPase_subD:_V-type_ATPase,_D_subunit]	0	0	0	0	0	0	0	0
TIGR00310[ZPR1_znf:_ZPR1_zinc_finger_domain]	0	0	0	0	0	0	0	0
TIGR00322[diphth2_R:_diphthamide_biosynthesis_enzyme_Dph1/Dph2_domain]	0	0	0	0	0	0	0	0
TIGR00322|TIGR00272[DPH2:_diphthamide_biosynthesis_protein_2]	0	0	0	0	0	0	0	0
TIGR00329[gcp_kae1:_metallohydrolase,_glycoprotease/Kae1_family]	0	0	0	0	0	0	0	0
TIGR00345[GET3_arsA_TRC40:_transport-energizing_ATPase,_TRC40/GET3/ArsA_family]	0	0	0	0	0	0	0	0
TIGR00347[bioD:_dethiobiotin_synthase]	0	0	0	0	0	0	0	0
TIGR00384[dhsB:_succinate_dehydrogenase_and_fumarate_reductase_iron-sulfur_protein]	0	0	0	0	0	0	0	0
TIGR00421[ubiX_pad:_polyprenyl_P-hydroxybenzoate_and_phenylacrylic_acid_decarboxylases]	0	0	0	0	0	0	0	0
TIGR00434[cysH:_phosophoadenylyl-sulfate_reductase]	0	0	0	0	0	0	0	0
TIGR00434|TIGR02057[PAPS_reductase:_phosphoadenosine_phosphosulfate_reductase]	0	0	0	0	0	0	0	0
TIGR00440|TIGR00463[gltX_arch:_glutamate--tRNA_ligase]	0	0	0	0	0	0	0	0
TIGR00446[nop2p:_NOL1/NOP2/sun_family_putative_RNA_methylase]	0	0	0	0	0	0	0	0
TIGR00447[pth:_peptidyl-tRNA_hydrolase]	0	0	0	0	0	0	0	0
TIGR00451[unchar_dom_2:_uncharacterized_domain_2]	0	0	0	0	0	0	0	0
TIGR00451|TIGR00425[CBF5:_putative_rRNA_pseudouridine_synthase]	0	0	0	0	0	0	0	0
TIGR00479[rumA:_23S_rRNA_(uracil-5-)-methyltransferase_RumA]	0	0	0	0	0	0	0	0
TIGR00485|TIGR00483[EF-1_alpha:_translation_elongation_factor_EF-1,_subunit_alpha]	0	0	0	0	0	0	0	0
TIGR00507|TIGR01093[aroD:_3-dehydroquinate_dehydratase,_type_I]	0	0	0	0	0	0	0	0
TIGR00507|TIGR01356[aroA:_3-phosphoshikimate_1-carboxyvinyltransferase]	0	0	0	0	0	0	0	0
TIGR00507|TIGR01357[aroB:_3-dehydroquinate_synthase]	0	0	0	0	0	0	0	0
TIGR00507|TIGR01809[Shik-DH-AROM:_shikimate-5-dehydrogenase]	0	0	0	0	0	0	0	0
TIGR00508[bioA:_adenosylmethionine-8-amino-7-oxononanoate_transaminase]	0	0	0	0	0	0	0	0
TIGR00516[acpS:_holo-[acyl-carrier-protein]_synthase]	0	0	0	0	0	0	0	0
TIGR00520[asnASE_II:_L-asparaginase,_type_II]	0	0	0	0	0	0	0	0
TIGR00524[eIF-2B_rel:_eIF-2B_alpha/beta/delta-related_uncharacterized_proteins]	0	0	0	0	0	0	0	0
TIGR00524|TIGR00512[salvage_mtnA:_S-methyl-5-thioribose-1-phosphate_isomerase]	0	0	0	0	0	0	0	0
TIGR00525|TIGR01496[DHPS:_dihydropteroate_synthase]	0	0	0	0	0	0	0	0
TIGR00525|TIGR01498[folK:_2-amino-4-hydroxy-6-hydroxymethyldihydropteridine_diphosphokinase]	0	0	0	0	0	0	0	0
TIGR00526[folB_dom:_FolB_domain]	0	0	0	0	0	0	0	0
TIGR00526|TIGR01496[DHPS:_dihydropteroate_synthase]	0	0	0	0	0	0	0	0
TIGR00526|TIGR01498[folK:_2-amino-4-hydroxy-6-hydroxymethyldihydropteridine_diphosphokinase]	0	0	0	0	0	0	0	0
TIGR00530[AGP_acyltrn:_1-acylglycerol-3-phosphate_O-acyltransferases]	0	0	0	0	0	0	0	0
TIGR00536[hemK_fam:_methyltransferase,_HemK_family]	0	0	0	0	0	0	0	0
TIGR00545[lipoyltrans:_lipoyltransferase_and_lipoate-protein_ligase]	0	0	0	0	0	0	0	0
TIGR00556[pantethn_trn:_phosphopantetheine--protein_transferase_domain]	0	0	0	0	0	0	0	0
TIGR00566[trpG_papA:_glutamine_amidotransferase_of_anthranilate_synthase_or_aminodeoxychorismate_synthase]	0	0	0	0	0	0	0	0
TIGR00566|TIGR01823[PabB-fungal:_aminodeoxychorismate_synthase]	0	0	0	0	0	0	0	0
TIGR00569[ccl1:_cyclin_ccl1]	0	0	0	0	0	0	0	0
TIGR00574[dnl1:_DNA_ligase_I,_ATP-dependent_(dnl1)]	0	0	0	0	0	0	0	0
TIGR00576[dut:_dUTP_diphosphatase]	0	0	0	0	0	0	0	0
TIGR00585[mutl:_DNA_mismatch_repair_protein_MutL]	0	0	0	0	0	0	0	0
TIGR00587[nfo:_apurinic_endonuclease_(APN1)]	0	0	0	0	0	0	0	0
TIGR00588[ogg:_8-oxoguanine_DNA-glycosylase_(ogg)]	0	0	0	0	0	0	0	0
TIGR00589[ogt:_methylated-DNA-[protein]-cysteine_S-methyltransferase]	0	0	0	0	0	0	0	0
TIGR00592[pol2:_DNA_polymerase_(pol2)]	0	0	0	0	0	0	0	0
TIGR00596[rad1:_DNA_repair_protein_(rad1)]	0	0	0	0	0	0	0	0
TIGR00597[rad10:_DNA_repair_protein_rad10]	0	0	0	0	0	0	0	0
TIGR00600[rad2:_DNA_excision_repair_protein_(rad2)]	0	0	0	0	0	0	0	0
TIGR00602[rad24:_checkpoint_protein_rad24]	0	0	0	0	0	0	0	0
TIGR00603[rad25:_DNA_repair_helicase_rad25]	0	0	0	0	0	0	0	0
TIGR00604[rad3:_DNA_repair_helicase_(rad3)]	0	0	0	0	0	0	0	0
TIGR00606[rad50:_rad50]	0	0	0	0	0	0	0	0
TIGR00607[rad52:_recombination_protein_rad52]	0	0	0	0	0	0	0	0
TIGR00614[recQ_fam:_ATP-dependent_DNA_helicase,_RecQ_family]	0	0	0	0	0	0	0	0
TIGR00617[rpa1:_replication_factor-a_protein_1_(rpa1)]	0	0	0	0	0	0	0	0
TIGR00622[ssl1:_transcription_factor_ssl1]	0	0	0	0	0	0	0	0
TIGR00625[tfb2:_transcription_factor_Tfb2]	0	0	0	0	0	0	0	0
TIGR00627[tfb4:_transcription_factor_tfb4]	0	0	0	0	0	0	0	0
TIGR00654[PhzF_family:_phenazine_biosynthesis_protein,_PhzF_family]	0	0	0	0	0	0	0	0
TIGR00657[asp_kinases:_aspartate_kinase]	0	0	0	0	0	0	0	0
TIGR00670|TIGR01368[CPSaseIIsmall:_carbamoyl-phosphate_synthase,_small_subunit]	0	0	0	0	0	0	0	0
TIGR00670|TIGR01369[CPSaseII_lrg:_carbamoyl-phosphate_synthase,_large_subunit]	0	0	0	0	0	0	0	0
TIGR00694[thiM:_hydroxyethylthiazole_kinase]	0	0	0	0	0	0	0	0
TIGR00707[argD:_transaminase,_acetylornithine/succinylornithine_family]	0	0	0	0	0	0	0	0
TIGR00724[urea_amlyse_rel:_biotin-dependent_carboxylase_uncharacterized_domain]	0	0	0	0	0	0	0	0
TIGR00724|TIGR02712[urea_carbox:_urea_carboxylase]	0	0	0	0	0	0	0	0
TIGR00724|TIGR02713[allophanate_hyd:_allophanate_hydrolase]	0	0	0	0	0	0	0	0
TIGR00728[OPT_sfam:_oligopeptide_transporter,_OPT_superfamily]	0	0	0	0	0	0	0	0
TIGR00728|TIGR00727[ISP4_OPT:_small_oligopeptide_transporter,_OPT_family]	0	0	0	0	0	0	0	0
TIGR00735[hisF:_imidazoleglycerol_phosphate_synthase,_cyclase_subunit]	0	0	0	0	0	0	0	0
TIGR00745[apbA_panE:_2-dehydropantoate_2-reductase]	0	0	0	0	0	0	0	0
TIGR00756[PPR:_pentatricopeptide_repeat_domain]	0	0	0	0	0	0	0	0
TIGR00761|TIGR01850[argC:_N-acetyl-gamma-glutamyl-phosphate_reductase]	0	0	0	0	0	0	0	0
TIGR00790[fnt:_formate/nitrite_transporter]	0	0	0	0	0	0	0	0
TIGR00794[kup:_potassium_uptake_protein]	0	0	0	0	0	0	0	0
TIGR00797[matE:_MATE_efflux_family_protein]	0	0	0	0	0	0	0	0
TIGR00798[mtc:_tricarboxylate_carrier]	0	0	0	0	0	0	0	0
TIGR00800[ncs1:_NCS1_nucleoside_transporter_family]	0	0	0	0	0	0	0	0
TIGR00801[ncs2:_uracil-xanthine_permease]	0	0	0	0	0	0	0	0
TIGR00803[nst:_UDP-galactose_transporter]	0	0	0	0	0	0	0	0
TIGR00813[sss:_transporter,_solute:sodium_symporter_(SSS)_family]	0	0	0	0	0	0	0	0
TIGR00815[sulP:_sulfate_permease]	0	0	0	0	0	0	0	0
TIGR00817[tpt:_Tpt_phosphate/phosphoenolpyruvate_translocator]	0	0	0	0	0	0	0	0
TIGR00820[zip:_ZIP_zinc/iron_transport_family]	0	0	0	0	0	0	0	0
TIGR00836[amt:_ammonium_transporter]	0	0	0	0	0	0	0	0
TIGR00844[c_cpa1:_sodium/hydrogen_antiporter]	0	0	0	0	0	0	0	0
TIGR00846[caca2:_calcium/proton_exchanger]	0	0	0	0	0	0	0	0
TIGR00846|TIGR00378[cax:_calcium/proton_exchanger]	0	0	0	0	0	0	0	0
TIGR00857|TIGR02033[D-hydantoinase:_dihydropyrimidinase]	0	0	0	0	0	0	0	0
TIGR00861[MIP:_MIP_family_channel_proteins]	0	0	0	0	0	0	0	0
TIGR00869[sec62:_protein_translocation_protein,_Sec62_family]	0	0	0	0	0	0	0	0
TIGR00878|TIGR00877[purD:_phosphoribosylamine--glycine_ligase]	0	0	0	0	0	0	0	0
TIGR00879[SP:_MFS_transporter,_sugar_porter_(SP)_family]	0	0	0	0	0	0	0	0
TIGR00880[2_A_01_02:_multidrug_resistance_protein]	0	0	0	0	0	0	0	0
TIGR00888|TIGR00884[guaA_Cterm:_GMP_synthase_(glutamine-hydrolyzing),_C-terminal_domain]	0	0	0	0	0	0	0	0
TIGR00891[2A0112:_MFS_transporter,_sialate:H+_symporter_(SHS)_family]	0	0	0	0	0	0	0	0
TIGR00893[2A0114:_D-galactonate_transporter]	0	0	0	0	0	0	0	0
TIGR00907[2A0304:_amino_acid_permease]	0	0	0	0	0	0	0	0
TIGR00913[2A0310:_amino_acid_permease_(yeast)]	0	0	0	0	0	0	0	0
TIGR00932[2a37:_transporter,_monovalent_cation:proton_antiporter-2_(CPA2)_family]	0	0	0	0	0	0	0	0
TIGR00934[2a38euk:_potassium_uptake_protein,_Trk_family]	0	0	0	0	0	0	0	0
TIGR00939[2a57:_nucleoside_Transporter]	0	0	0	0	0	0	0	0
TIGR00951[2A43:_lysosomal_Cystine_Transporter]	0	0	0	0	0	0	0	0
TIGR00954[3a01203:_peroxysomal_long_chain_fatty_acyl_transporter]	0	0	0	0	0	0	0	0
TIGR00956[3a01205:_pleiotropic_drug_resistance_family_protein]	0	0	0	0	0	0	0	0
TIGR00958[3a01208:_antigen_peptide_transporter_2]	0	0	0	0	0	0	0	0
TIGR00980[3a0801so1tim17:_mitochondrial_import_inner_membrane_translocase_subunit_tim17]	0	0	0	0	0	0	0	0
TIGR00983[3a0801s02tim23:_mitochondrial_import_inner_membrane_translocase_subunit]	0	0	0	0	0	0	0	0
TIGR00985[3a0801s04tom:_mitochondrial_import_receptor_subunit]	0	0	0	0	0	0	0	0
TIGR00986[3a0801s05tom22:_mitochondrial_import_receptor_subunit]	0	0	0	0	0	0	0	0
TIGR00989[3a0801s07tom40:_mitochondrial_import_receptor_subunit]	0	0	0	0	0	0	0	0
TIGR00990[3a0801s09:_mitochondrial_precursor_proteins_import_receptor]	0	0	0	0	0	0	0	0
TIGR01016[sucCoAbeta:_succinate-CoA_ligase,_beta_subunit]	0	0	0	0	0	0	0	0
TIGR01018|TIGR02146[LysS_fung_arch:_homocitrate_synthase]	0	0	0	0	0	0	0	0
TIGR01019[sucCoAalpha:_succinate-CoA_ligase,_alpha_subunit]	0	0	0	0	0	0	0	0
TIGR01037[pyrD_sub1_fam:_dihydroorotate_dehydrogenase_family_protein]	0	0	0	0	0	0	0	0
TIGR01049[rpsJ_bact:_ribosomal_protein_S10]	0	0	0	0	0	0	0	0
TIGR01053[LSD1:_zinc_finger_domain,_LSD1_subclass]	0	0	0	0	0	0	0	0
TIGR01130[ER_PDI_fam:_protein_disulfide_isomerase]	0	0	0	0	0	0	0	0
TIGR01159[DRP1:_density-regulated_protein_DRP1]	0	0	0	0	0	0	0	0
TIGR01162|TIGR01161[purK:_phosphoribosylaminoimidazole_carboxylase,_ATPase_subunit]	0	0	0	0	0	0	0	0
TIGR01170[rplA_mito:_ribosomal_protein_L1,_mitochondrial]	0	0	0	0	0	0	0	0
TIGR01179[galE:_UDP-glucose_4-epimerase_GalE]	0	0	0	0	0	0	0	0
TIGR01180[aman2_put:_putative_alpha-1,2-mannosidase]	0	0	0	0	0	0	0	0
TIGR01197[nramp:_metal_ion_transporter,_metal_ion_(Mn2+/Fe2+)_transporter_(Nramp)_family]	0	0	0	0	0	0	0	0
TIGR01211[ELP3:_histone_acetyltransferase,_ELP3_family]	0	0	0	0	0	0	0	0
TIGR01219[Pmev_kin_ERG8:_phosphomevalonate_kinase]	0	0	0	0	0	0	0	0
TIGR01241[FtsH_fam:_ATP-dependent_metallopeptidase_HflB]	0	0	0	0	0	0	0	0
TIGR01242[26Sp45:_26S_proteasome_subunit_P45_family]	0	0	0	0	0	0	0	0
TIGR01243[CDC48:_AAA_family_ATPase,_CDC48_subfamily]	0	0	0	0	0	0	0	0
TIGR01251[ribP_PPkin:_ribose-phosphate_diphosphokinase]	0	0	0	0	0	0	0	0
TIGR01258[pgm_1:_phosphoglycerate_mutase_1_family]	0	0	0	0	0	0	0	0
TIGR01274[ACC_deam:_1-aminocyclopropane-1-carboxylate_deaminase]	0	0	0	0	0	0	0	0
TIGR01297[CDF:_cation_diffusion_facilitator_family_transporter]	0	0	0	0	0	0	0	0
TIGR01308[rpmD_bact:_ribosomal_protein_L30]	0	0	0	0	0	0	0	0
TIGR01310[L7:_60S_ribosomal_protein_L7]	0	0	0	0	0	0	0	0
TIGR01313[therm_gnt_kin:_carbohydrate_kinase,_thermoresistant_glucokinase_family]	0	0	0	0	0	0	0	0
TIGR01315[5C_CHO_kinase:_FGGY-family_pentulose_kinase]	0	0	0	0	0	0	0	0
TIGR01317[GOGAT_sm_gam:_glutamate_synthase,_NADH/NADPH,_small_subunit]	0	0	0	0	0	0	0	0
TIGR01324[cysta_beta_ly_B:_cystathionine_beta-lyase]	0	0	0	0	0	0	0	0
TIGR01326[OAH_OAS_sulfhy:_O-acetylhomoserine_aminocarboxypropyltransferase/cysteine_synthase]	0	0	0	0	0	0	0	0
TIGR01351[adk:_adenylate_kinase]	0	0	0	0	0	0	0	0
TIGR01359[UMP_CMP_kin_fam:_UMP-CMP_kinase_family]	0	0	0	0	0	0	0	0
TIGR01364[serC_1:_phosphoserine_transaminase]	0	0	0	0	0	0	0	0
TIGR01368|TIGR01369[CPSaseII_lrg:_carbamoyl-phosphate_synthase,_large_subunit]	0	0	0	0	0	0	0	0
TIGR01408[Ube1:_ubiquitin-activating_enzyme_E1]	0	0	0	0	0	0	0	0
TIGR01452[PGP_euk:_phosphoglycolate/pyridoxal_phosphate_phosphatase_family]	0	0	0	0	0	0	0	0
TIGR01460[HAD-SF-IIA:_HAD_hydrolase,_family_IIA]	0	0	0	0	0	0	0	0
TIGR01460|TIGR01456[CECR5:_HAD_hydrolase,_TIGR01456_family]	0	0	0	0	0	0	0	0
TIGR01470[cysG_Nterm:_siroheme_synthase,_N-terminal_domain]	0	0	0	0	0	0	0	0
TIGR01470|TIGR01469[cobA_cysG_Cterm:_uroporphyrinogen-III_C-methyltransferase]	0	0	0	0	0	0	0	0
TIGR01484[HAD-SF-IIB:_HAD_hydrolase,_family_IIB]	0	0	0	0	0	0	0	0
TIGR01484|TIGR00685[T6PP:_trehalose-phosphatase]	0	0	0	0	0	0	0	0
TIGR01488[HAD-SF-IB:_HAD_phosphoserine_phosphatase-like_hydrolase,_family_IB]	0	0	0	0	0	0	0	0
TIGR01488|TIGR00338[serB:_phosphoserine_phosphatase_SerB]	0	0	0	0	0	0	0	0
TIGR01489[DKMTPPase-SF:_2,3-diketo-5-methylthio-1-phosphopentane_phosphatase]	0	0	0	0	0	0	0	0
TIGR01494[ATPase_P-type:_HAD_ATPase,_P-type,_family_IC]	0	0	0	0	0	0	0	0
TIGR01494|TIGR01517[ATPase-IIB_Ca:_calcium-translocating_P-type_ATPase,_PMCA-type]	0	0	0	0	0	0	0	0
TIGR01494|TIGR01522[ATPase-IIA2_Ca:_calcium-transporting_P-type_ATPase,_PMR1-type]	0	0	0	0	0	0	0	0
TIGR01494|TIGR01523[ATPase-IID_K-Na:_potassium/sodium_efflux_P-type_ATPase,_fungal-type]	0	0	0	0	0	0	0	0
TIGR01494|TIGR01647[ATPase-IIIA_H:_plasma-membrane_proton-efflux_P-type_ATPase]	0	0	0	0	0	0	0	0
TIGR01494|TIGR01657[P-ATPase-V:_P-type_ATPase_of_unknown_pump_specificity_(type_V)]	0	0	0	0	0	0	0	0
TIGR01499[folC:_bifunctional_protein_FolC]	0	0	0	0	0	0	0	0
TIGR01509[HAD-SF-IA-v3:_HAD_hydrolase,_family_IA,_variant_3]	0	0	0	0	0	0	0	0
TIGR01509|TIGR01993[Pyr-5-nucltdase:_pyrimidine_5'-nucleotidase]	0	0	0	0	0	0	0	0
TIGR01511[ATPase-IB1_Cu:_copper-translocating_P-type_ATPase]	0	0	0	0	0	0	0	0
TIGR01525[ATPase-IB_hvy:_heavy_metal_translocating_P-type_ATPase]	0	0	0	0	0	0	0	0
TIGR01549[HAD-SF-IA-v1:_HAD_hydrolase,_family_IA,_variant_1]	0	0	0	0	0	0	0	0
TIGR01628[PABP-1234:_polyadenylate_binding_protein,_human_types_1,_2,_3,_4_family]	0	0	0	0	0	0	0	0
TIGR01652[ATPase-Plipid:_phospholipid-translocating_P-type_ATPase,_flippase]	0	0	0	0	0	0	0	0
TIGR01662[HAD-SF-IIIA:_HAD_hydrolase,_family_IIIA]	0	0	0	0	0	0	0	0
TIGR01662|TIGR01664[DNA-3'-Pase:_DNA_3'-phosphatase]	0	0	0	0	0	0	0	0
TIGR01662|TIGR01668[YqeG_hyp_ppase:_HAD_phosphatase,_family_IIIA]	0	0	0	0	0	0	0	0
TIGR01678[FAD_lactone_ox:_sugar_1,4-lactone_oxidases]	0	0	0	0	0	0	0	0
TIGR01681[HAD-SF-IIIC:_HAD_phosphatase,_family_IIIC]	0	0	0	0	0	0	0	0
TIGR01681|TIGR01685[MDP-1:_magnesium-dependent_phosphatase-1]	0	0	0	0	0	0	0	0
TIGR01697[PNPH-PUNA-XAPA:_inosine/guanosine/xanthosine_phosphorylase_family]	0	0	0	0	0	0	0	0
TIGR01733[AA-adenyl-dom:_amino_acid_adenylation_domain]	0	0	0	0	0	0	0	0
TIGR01746[Thioester-redct:_thioester_reductase_domain]	0	0	0	0	0	0	0	0
TIGR01746|TIGR03443[alpha_am_amid:_L-aminoadipate-semialdehyde_dehydrogenase]	0	0	0	0	0	0	0	0
TIGR01780[SSADH:_succinate-semialdehyde_dehydrogenase]	0	0	0	0	0	0	0	0
TIGR01787[squalene_cyclas:_squalene/oxidosqualene_cyclases]	0	0	0	0	0	0	0	0
TIGR01812[sdhA_frdA_Gneg:_succinate_dehydrogenase_or_fumarate_reductase,_flavoprotein_subunit]	0	0	0	0	0	0	0	0
TIGR01812|TIGR01816[sdhA_forward:_succinate_dehydrogenase,_flavoprotein_subunit]	0	0	0	0	0	0	0	0
TIGR01813[flavo_cyto_c:_flavocytochrome_c]	0	0	0	0	0	0	0	0
TIGR01855|TIGR00735[hisF:_imidazoleglycerol_phosphate_synthase,_cyclase_subunit]	0	0	0	0	0	0	0	0
TIGR01856[hisJ_fam:_histidinol_phosphate_phosphatase,_HisJ_family]	0	0	0	0	0	0	0	0
TIGR01879[hydantase:_amidase,_hydantoinase/carbamoylase_family]	0	0	0	0	0	0	0	0
TIGR01930[AcCoA-C-Actrans:_acetyl-CoA_C-acetyltransferase]	0	0	0	0	0	0	0	0
TIGR01934[MenG_MenH_UbiE:_ubiquinone/menaquinone_biosynthesis_methyltransferase]	0	0	0	0	0	0	0	0
TIGR01957[nuoB_fam:_NADH-quinone_oxidoreductase,_B_subunit]	0	0	0	0	0	0	0	0
TIGR01958[nuoE_fam:_NADH-quinone_oxidoreductase,_E_subunit]	0	0	0	0	0	0	0	0
TIGR01961[NuoC_fam:_NADH_(or_F420H2)_dehydrogenase,_subunit_C]	0	0	0	0	0	0	0	0
TIGR01971[NuoI:_NADH-quinone_oxidoreductase,_chain_I]	0	0	0	0	0	0	0	0
TIGR01988[Ubi-OHases:_ubiquinone_biosynthesis_hydroxylase,_UbiH/UbiF/VisC/COQ6_family]	0	0	0	0	0	0	0	0
TIGR01989[COQ6:_ubiquinone_biosynthesis_monooxygenase_COQ6]	0	0	0	0	0	0	0	0
TIGR02006[IscS:_cysteine_desulfurase_IscS]	0	0	0	0	0	0	0	0
TIGR02093[P_ylase:_glycogen/starch/alpha-glucan_phosphorylases]	0	0	0	0	0	0	0	0
TIGR02133[RPI_actino:_ribose_5-phosphate_isomerase]	0	0	0	0	0	0	0	0
TIGR02238[recomb_DMC1:_meiotic_recombinase_Dmc1]	0	0	0	0	0	0	0	0
TIGR02250[FCP1_euk:_FCP1-like_phosphatase,_phosphatase_domain]	0	0	0	0	0	0	0	0
TIGR02251[HIF-SF_euk:_dullard-like_phosphatase_domain]	0	0	0	0	0	0	0	0
TIGR02252[DREG-2:_HAD_hydrolase,_REG-2-like,_family_IA]	0	0	0	0	0	0	0	0
TIGR02330[prpD:_2-methylcitrate_dehydratase]	0	0	0	0	0	0	0	0
TIGR02374[nitri_red_nirB:_nitrite_reductase_[NAD(P)H],_large_subunit]	0	0	0	0	0	0	0	0
TIGR02378[nirD_assim_sml:_nitrite_reductase_[NAD(P)H],_small_subunit]	0	0	0	0	0	0	0	0
TIGR02428[pcaJ_scoB_fam:_3-oxoacid_CoA-transferase,_B_subunit]	0	0	0	0	0	0	0	0
TIGR02429[pcaI_scoA_fam:_3-oxoacid_CoA-transferase,_A_subunit]	0	0	0	0	0	0	0	0
TIGR02967[guan_deamin:_guanine_deaminase]	0	0	0	0	0	0	0	0
TIGR03178[allantoinase:_allantoinase]	0	0	0	0	0	0	0	0
TIGR03188|TIGR00069[hisD:_histidinol_dehydrogenase]	0	0	0	0	0	0	0	0
TIGR03317[ygfZ_signature:_folate-binding_protein_YgfZ]	0	0	0	0	0	0	0	0
TIGR03401[cyanamide_fam:_HD_domain_protein,_cyanamide_hydratase_family]	0	0	0	0	0	0	0	0
TIGR03402|TIGR02006[IscS:_cysteine_desulfurase_IscS]	0	0	0	0	0	0	0	0
TIGR03413[GSH_gloB:_hydroxyacylglutathione_hydrolase]	0	0	0	0	0	0	0	0
TIGR03422[mito_frataxin:_frataxin]	0	0	0	0	0	0	0	0
TIGR03455|TIGR00070[hisG:_ATP_phosphoribosyltransferase]	0	0	0	0	0	0	0	0
TIGR03592[yidC_oxa1_cterm:_membrane_protein_insertase,_YidC/Oxa1_family]	0	0	0	0	0	0	0	0
TIGR03860[FMN_nitrolo:_FMN-dependent_oxidoreductase,_nitrilotriacetate_monooxygenase_family]	0	0	0	0	0	0	0	0
TIGR04306[salvage_TenA:_thiaminase_II]	0	0	0	0	0	0	0	0
TIGR04335[AmmeMemoSam_A:_AmmeMemoRadiSam_system_protein_A]	0	0	0	0	0	0	0	0
TIGR04335|TIGR00296[TIGR00296:_uncharacterized_protein,_PH0010_family]	0	0	0	0	0	0	0	0
PF01035.15|DNA_binding_1[6-O-methylguanine_DNA_methyltransferase,_DNA_binding_domain]	2	2	2	2	2	0	1	0
PF01637.13|Arch_ATPase[Archaeal_ATPase]	2	2	2	2	2	0	1	0
PF01667.12|Ribosomal_S27e[Ribosomal_protein_S27]	2	2	2	2	2	1	0	0
PF14461.1|Prok-E2_B[Prokaryotic_E2_family_B]	2	2	2	2	2	0	1	0
PF03795.9|YCII[YCII-related_domain]	1	2	2	2	2	0	1	0
PF00190.17|Cupin_1[Cupin]	1	1	1	1	1	0	1	0
PF01067.17|Calpain_III[Calpain_large_subunit,_domain_III]	1	1	1	1	1	0	1	0
PF01083.17|Cutinase[Cutinase]	1	1	1	1	1	0	0	1
PF01221.13|Dynein_light[Dynein_light_chain_type_1]	1	1	1	1	1	0	1	0
PF01267.12|F-actin_cap_A[F-actin_capping_protein_alpha_subunit]	1	1	1	1	1	0	1	0
PF01454.14|MAGE[MAGE_family]	1	1	1	1	1	0	1	0
PF01907.14|Ribosomal_L37e[Ribosomal_protein_L37e]	1	1	1	1	1	0	0	1
PF02268.11|TFIIA_gamma_N[Transcription_initiation_factor_IIA,_gamma_subunit,_helical_domain]	1	1	1	1	1	0	1	0
PF02296.11|Alpha_adaptin_C[Alpha_adaptin_AP2,_C-terminal_domain]	1	1	1	1	1	0	0	1
PF02751.9|TFIIA_gamma_C[Transcription_initiation_factor_IIA,_gamma_subunit]	1	1	1	1	1	0	1	0
PF02939.11|UcrQ[UcrQ_family]	1	1	1	1	1	0	1	0
PF03209.10|PUCC[PUCC_protein]	1	1	1	1	1	0	1	0
PF03902.8|Gal4_dimer[Gal4-like_dimerisation_domain]	1	1	1	1	1	0	1	0
PF04406.9|TP6A_N[Type_IIB_DNA_topoisomerase]	1	1	1	1	1	0	1	0
PF06508.8|QueC[Queuosine_biosynthesis_protein_QueC]	1	1	1	1	1	1	0	0
PF06888.7|Put_Phosphatase[Putative_Phosphatase]	1	1	1	1	1	0	0	1
PF07885.11|Ion_trans_2[Ion_channel]	1	1	1	1	1	0	1	0
PF07986.7|TBCC[Tubulin_binding_cofactor_C]	1	1	1	1	1	0	0	1
PF08650.5|DASH_Dad4[DASH_complex_subunit_Dad4]	1	1	1	1	1	0	1	0
PF08653.5|DASH_Dam1[DASH_complex_subunit_Dam1]	1	1	1	1	1	0	1	0
PF08728.5|CRT10[CRT10]	1	1	1	1	1	0	1	0
PF09139.6|Mmp37[Mitochondrial_matrix_Mmp37]	1	1	1	1	1	0	1	0
PF09184.6|PPP4R2[PPP4R2]	1	1	1	1	1	0	1	0
PF09446.5|VMA21[VMA21-like_domain]	1	1	1	1	1	0	0	1
PF09494.5|Slx4[Slx4_endonuclease]	1	1	1	1	1	0	0	1
PF09631.5|Sen15[Sen15_protein]	1	1	1	1	1	0	0	1
PF09696.5|Ctf8[Ctf8]	1	1	1	1	1	1	0	0
PF09796.4|QCR10[Ubiquinol-cytochrome-c_reductase_complex_subunit_(QCR10)]	1	1	1	1	1	1	0	0
PF10182.4|Flo11[Flo11_domain]	1	1	1	1	1	0	1	0
PF10315.4|DUF2416[Protein_of_unknown_function_(DUF2416)]	1	1	1	1	1	0	1	0
PF10429.4|Mtr2[Nuclear_pore_RNA_shuttling_protein_Mtr2]	1	1	1	1	1	1	0	0
PF12660.2|zf-TFIIIC[Putative_zinc-finger_of_transcription_factor_IIIC_complex]	1	1	1	1	1	0	1	0
PF12689.2|Acid_PPase[Acid_Phosphatase]	1	1	1	1	1	0	1	0
PF12734.2|CYSTM[Cysteine-rich_TM_module_stress_tolerance]	1	1	1	1	1	1	0	0
PF13560.1|HTH_31[Helix-turn-helix_domain]	1	1	1	1	1	0	0	1
PF13932.1|GIDA_assoc_3[GidA_associated_domain_3]	1	1	1	1	1	0	1	0
TIGR00537[hemK_rel_arch:_putative_methylase]	1	1	1	1	1	0	1	0
TIGR01685[MDP-1:_magnesium-dependent_phosphatase-1]	1	1	1	1	1	0	1	0
TIGR01823[PabB-fungal:_aminodeoxychorismate_synthase]	1	1	1	1	1	0	1	0
PF05303.7|DUF727[Protein_of_unknown_function_(DUF727)]	1	1	1	0	1	0	1	0
PF05401.6|NodS[Nodulation_protein_S_(NodS)]	1	1	1	0	1	0	1	0
PF07004.7|SHIPPO-rpt[Sperm-tail_PG-rich_repeat]	0	1	1	1	1	0	0	1
PF08991.5|DUF1903[Domain_of_unknown_function_(DUF1903)]	1	0	1	1	1	0	1	0
PF09818.4|ABC_ATPase[Predicted_ATPase_of_the_ABC_class]	0	1	1	1	1	1	0	0
PF12246.3|MKT1_C[Temperature_dependent_protein_affecting_M2_dsRNA_replication]	1	0	1	1	1	0	1	0
PF13669.1|Glyoxalase_4[Glyoxalase/Bleomycin_resistance_protein/Dioxygenase_superfamily]	1	1	1	0	1	1	0	0
TIGR00327[secE_euk_arch:_protein_translocase_SEC61_complex_gamma_subunit,_archaeal_and_eukaryotic]	0	1	1	1	1	1	0	0
TIGR00460[fmt:_methionyl-tRNA_formyltransferase]	0	1	1	1	1	0	0	1
PF02935.11|COX7C[Cytochrome_c_oxidase_subunit_VIIc]	0	0	1	1	1	1	0	0
PF03645.8|Tctex-1[Tctex-1_family]	0	1	1	0	1	0	1	0
PF04889.7|Cwf_Cwc_15[Cwf15/Cwc15_cell_cycle_control_protein]	0	1	1	0	1	0	0	1
PF10544.4|T5orf172[T5orf172_domain]	1	0	1	1	0	0	1	0
PF13180.1|PDZ_2[PDZ_domain]	0	1	0	1	1	0	0	1
PF14667.1|Polysacc_synt_C[Polysaccharide_biosynthesis_C-terminal_domain]	0	1	0	1	1	0	1	0
PF02911.13|Formyl_trans_C[Formyl_transferase,_C-terminal_domain]	0	0	1	0	0	1	0	0
PF10471.4|APC_CDC26[Anaphase-promoting_complex_APC_subunit_1]	0	0	1	0	0	0	0	1
PF00444.13|Ribosomal_L36[Ribosomal_protein_L36]	0	0	0	0	0	0	1	0
PF00832.15|Ribosomal_L39[Ribosomal_L39_protein]	0	0	0	0	0	0	1	0
PF02012.15|BNR[BNR/Asp-box_repeat]	0	0	0	0	0	0	0	1
PF03101.10|FAR1[FAR1_DNA-binding_domain]	0	0	0	0	0	0	1	0
PF03328.9|HpcH_HpaI[HpcH/HpaI_aldolase/citrate_lyase_family]	0	0	0	0	0	0	0	1
PF03604.8|DNA_RNApol_7kD[DNA_directed_RNA_polymerase,_7_kDa_subunit]	0	0	0	0	0	1	0	0
PF03966.11|Trm112p[Trm112p-like_protein]	0	0	0	0	0	0	0	1
PF04032.11|Rpr2[RNAse_P_Rpr2/Rpp21/SNM1_subunit_domain]	0	0	0	0	0	0	1	0
PF04419.9|4F5[4F5_protein_family]	0	0	0	0	0	0	1	0
PF04535.7|DUF588[Domain_of_unknown_function_(DUF588)]	0	0	0	0	0	0	1	0
PF04911.7|ATP-synt_J[ATP_synthase_j_chain]	0	0	0	0	0	0	0	1
PF05162.8|Ribosomal_L41[Ribosomal_protein_L41]	0	0	0	0	0	0	1	0
PF05620.6|DUF788[Protein_of_unknown_function_(DUF788)]	0	0	0	0	0	0	1	0
PF05768.9|DUF836[Glutaredoxin-like_domain_(DUF836)]	0	0	0	0	0	0	1	0
PF06155.7|DUF971[Protein_of_unknown_function_(DUF971)]	0	0	0	0	0	0	1	0
PF06624.7|RAMP4[Ribosome_associated_membrane_protein_RAMP4]	0	0	0	0	0	0	1	0
PF06821.8|Ser_hydrolase[Serine_hydrolase]	0	0	0	0	0	0	0	1
PF07221.6|GlcNAc_2-epim[N-acylglucosamine_2-epimerase_(GlcNAc_2-epimerase)]	0	0	0	0	0	0	0	1
PF08114.6|PMP1_2[ATPase_proteolipid_family]	0	0	0	0	0	1	0	0
PF08122.7|NDUF_B12[NADH-ubiquinone_oxidoreductase_B12_subunit_family]	0	0	0	0	0	0	1	0
PF08654.5|DASH_Dad2[DASH_complex_subunit_Dad2]	0	0	0	0	0	0	1	0
PF09072.5|TMA7[Translation_machinery_associated_TMA7]	0	0	0	0	0	0	1	0
PF09594.5|DUF2029[Protein_of_unknown_function_(DUF2029)]	0	0	0	0	0	0	1	0
PF10224.4|DUF2205[Predicted_coiled-coil_protein_(DUF2205)]	0	0	0	0	0	0	0	1
PF10475.4|DUF2450[Protein_of_unknown_function_N-terminal_domain_(DUF2450)]	0	0	0	0	0	0	0	1
PF10551.4|MULE[MULE_transposase_domain]	0	0	0	0	0	0	1	0
PF13278.1|DUF4066[Putative_amidotransferase]	0	0	0	0	0	0	1	0
PF13431.1|TPR_17[Tetratricopeptide_repeat]	0	0	0	0	0	0	1	0
PF13533.1|Biotin_lipoyl_2[Biotin-lipoyl_like]	0	0	0	0	0	0	1	0
PF13746.1|Fer4_18[4Fe-4S_dicluster_domain]	0	0	0	0	0	1	0	0
PF13821.1|DUF4187[Domain_of_unknown_function_(DUF4187)]	0	0	0	0	0	0	0	1
TIGR00097[HMP-P_kinase:_phosphomethylpyrimidine_kinase]	0	0	0	0	0	0	1	0
TIGR00186[rRNA_methyl_3:_RNA_methyltransferase,_TrmH_family,_group_3]	0	0	0	0	0	0	1	0
TIGR00855[L12:_ribosomal_protein_L7/L12]	0	0	0	0	0	0	1	0
TIGR01022[rpmJ_bact:_ribosomal_protein_L36]	0	0	0	0	0	0	1	0
PF12861.2|zf-Apc11[Anaphase-promoting_complex_subunit_11_RING-H2_finger]	3	3	3	3	3	0	2	0
PF02689.9|Herpes_Helicase[Helicase]	2	2	2	2	2	0	1	1
PF00011.16|HSP20[Hsp20/alpha_crystallin_family]	1	1	1	1	1	1	0	1
PF00035.20|dsrm[Double-stranded_RNA_binding_motif]	1	1	1	1	1	1	0	1
PF00800.13|PDT[Prephenate_dehydratase]	1	1	1	1	1	0	1	1
PF01249.13|Ribosomal_S21e[Ribosomal_protein_S21e]	1	1	1	1	1	0	1	1
PF01632.14|Ribosomal_L35p[Ribosomal_protein_L35]	1	1	1	1	1	1	0	1
PF01650.13|Peptidase_C13[Peptidase_C13_family]	1	1	1	1	1	1	0	1
PF01687.12|Flavokinase[Riboflavin_kinase]	1	1	1	1	1	1	0	1
PF01781.13|Ribosomal_L38e[Ribosomal_L38e_protein_family]	1	1	1	1	1	1	1	0
PF02200.11|STE[STE_like_transcription_factor]	1	1	1	1	1	1	0	1
PF02517.11|Abi[CAAX_protease_self-immunity]	1	1	1	1	1	0	1	1
PF03485.11|Arg_tRNA_synt_N[Arginyl_tRNA_synthetase_N_terminal_domain]	1	1	1	1	1	1	0	1
PF04031.8|Las1[Las1-like]	1	1	1	1	1	1	1	0
PF04050.9|Upf2[Up-frameshift_suppressor_2]	1	1	1	1	1	0	1	1
PF04086.8|SRP-alpha_N[Signal_recognition_particle,_alpha_subunit,_N-terminal]	1	1	1	1	1	1	0	1
PF04172.11|LrgB[LrgB-like_family]	1	1	1	1	1	0	1	1
PF04181.8|RPAP2_Rtr1[Rtr1/RPAP2_family]	1	1	1	1	1	0	1	1
PF04376.8|ATE_N[Arginine-tRNA-protein_transferase,_N_terminus]	1	1	1	1	1	0	1	1
PF04847.7|Calcipressin[Calcipressin]	1	1	1	1	1	0	1	1
PF05131.9|Pep3_Vps18[Pep3/Vps18/deep_orange_family]	1	1	1	1	1	0	1	1
PF05291.6|Bystin[Bystin]	1	1	1	1	1	0	1	1
PF05839.6|Apc13p[Apc13p_protein]	1	1	1	1	1	1	0	1
PF06179.7|Med22[Surfeit_locus_protein_5_subunit_22_of_Mediator_complex]	1	1	1	1	1	0	1	1
PF06212.7|GRIM-19[GRIM-19_protein]	1	1	1	1	1	0	1	1
PF06699.6|PIG-F[GPI_biosynthesis_protein_family_Pig-F]	1	1	1	1	1	0	1	1
PF06991.6|Prp19_bind[Splicing_factor,_Prp19-binding_domain]	1	1	1	1	1	1	0	1
PF07954.6|DUF1689[Protein_of_unknown_function_(DUF1689)]	1	1	1	1	1	0	1	1
PF07985.7|SRR1[SRR1]	1	1	1	1	1	1	0	1
PF08231.7|SYF2[SYF2_splicing_factor]	1	1	1	1	1	1	1	0
PF08293.6|MRP-S33[Mitochondrial_ribosomal_subunit_S27]	1	1	1	1	1	0	1	1
PF08457.5|Sfi1[Sfi1_spindle_body_protein]	1	1	1	1	1	0	1	1
PF08557.5|Lipid_DES[Sphingolipid_Delta4-desaturase_(DES)]	1	1	1	1	1	0	1	1
PF08608.7|Wyosine_form[Wyosine_base_formation]	1	1	1	1	1	1	1	0
PF08661.6|Rep_fac-A_3[Replication_factor_A_protein_3]	1	1	1	1	1	0	1	1
PF08746.6|zf-RING-like[RING-like_domain]	1	1	1	1	1	1	0	1
PF08783.6|DWNN[DWNN_domain]	1	1	1	1	1	1	1	0
PF09174.5|Maf1[Maf1_regulator]	1	1	1	1	1	1	1	0
PF09302.6|XLF[XLF_(XRCC4-like_factor)]	1	1	1	1	1	1	0	1
PF09329.6|zf-primase[Primase_zinc_finger]	1	1	1	1	1	1	1	0
PF09435.5|DUF2015[Fungal_protein_of_unknown_function_(DUF2015)]	1	1	1	1	1	0	1	1
PF09497.5|Med12[Transcription_mediator_complex_subunit_Med12]	1	1	1	1	1	1	0	1
PF09598.5|Stm1_N[Stm1]	1	1	1	1	1	1	1	0
PF09785.4|Prp31_C[Prp31_C_terminal_domain]	1	1	1	1	1	0	1	1
PF09848.4|DUF2075[Uncharacterized_conserved_protein_(DUF2075)]	1	1	1	1	1	1	0	1
PF10163.4|EnY2[Transcription_factor_e(y)2]	1	1	1	1	1	1	0	1
PF10338.4|DUF2423[Protein_of_unknown_function_(DUF2423)]	1	1	1	1	1	0	1	1
PF10428.4|SOG2[RAM_signalling_pathway_protein]	1	1	1	1	1	1	1	0
PF10450.4|POC1[POC1_chaperone]	1	1	1	1	1	0	1	1
PF10454.4|DUF2458[Protein_of_unknown_function_(DUF2458)]	1	1	1	1	1	1	0	1
PF10680.4|RRN9[RNA_polymerase_I_specific_transcription_initiation_factor]	1	1	1	1	1	0	1	1
PF11274.3|DUF3074[Protein_of_unknown_function_(DUF3074)]	1	1	1	1	1	1	1	0
PF11699.3|CENP-C_C[Mif2/CENP-C_like]	1	1	1	1	1	1	0	1
PF12513.3|SUV3_C[Mitochondrial_degradasome_RNA_helicase_subunit_C_terminal]	1	1	1	1	1	1	0	1
PF12658.2|Ten1[Telomere_capping,_CST_complex_subunit]	1	1	1	1	1	1	0	1
PF13041.1|PPR_2[PPR_repeat_family]	1	1	1	1	1	1	0	1
PF13231.1|PMT_2[Dolichyl-phosphate-mannose-protein_mannosyltransferase]	1	1	1	1	1	1	0	1
PF13292.1|DXP_synthase_N[1-deoxy-D-xylulose-5-phosphate_synthase]	1	1	1	1	1	0	1	1
PF13532.1|2OG-FeII_Oxy_2[2OG-Fe(II)_oxygenase_superfamily]	1	1	1	1	1	1	1	0
PF13555.1|AAA_29[P-loop_containing_region_of_AAA_domain]	1	1	1	1	1	1	0	1
PF13867.1|SAP30_Sin3_bdg[Sin3_binding_region_of_histone_deacetylase_complex_subunit_SAP30]	1	1	1	1	1	0	1	1
PF13912.1|zf-C2H2_6[C2H2-type_zinc_finger]	1	1	1	1	1	0	1	1
PF13975.1|gag-asp_proteas[gag-polyprotein_putative_aspartyl_protease]	1	1	1	1	1	1	1	0
PF14382.1|ECR1_N[Exosome_complex_exonuclease_RRP4_N-terminal_region]	1	1	1	1	1	0	1	1
PF14570.1|zf-RING_4[RING/Ubox_like_zinc-binding_domain]	1	1	1	1	1	0	1	1
PF14668.1|RICTOR_V[Rapamycin-insensitive_companion_of_mTOR,_domain_5]	1	1	1	1	1	0	1	1
PF15630.1|CENP-S[Kinetochore_component_CENP-S]	1	1	1	1	1	1	1	0
TIGR00235[udk:_uridine_kinase]	1	1	1	1	1	1	0	1
TIGR00450[mnmE_trmE_thdF:_tRNA_modification_GTPase_TrmE]	1	1	1	1	1	0	1	1
TIGR00552[nadE:_NAD+_synthetase]	1	1	1	1	1	1	0	1
TIGR00599[rad18:_DNA_repair_protein_rad18]	1	1	1	1	1	1	0	1
TIGR00887[2A0109:_phosphate:H+_symporter]	1	1	1	1	1	0	1	1
TIGR01090[apt:_adenine_phosphoribosyltransferase]	1	1	1	1	1	0	1	1
TIGR01632[L11_bact:_ribosomal_protein_L11]	1	1	1	1	1	0	1	1
TIGR02727[MTHFS_bact:_5-formyltetrahydrofolate_cyclo-ligase]	1	1	1	1	1	1	1	0
PF03069.10|FmdA_AmdA[Acetamidase/Formamidase_family]	0	1	1	1	1	1	1	0
PF09415.5|CENP-X[CENP-S_associating_Centromere_protein_X]	1	1	0	1	1	1	0	1
PF10528.4|PA14_2[GLEYA_domain]	1	1	1	0	1	1	1	0
TIGR00221[nagA:_N-acetylglucosamine-6-phosphate_deacetylase]	0	1	1	1	1	1	0	1
PF00631.17|G-gamma[GGL_domain]	1	0	1	1	0	1	1	0
PF10906.3|DUF2697[Protein_of_unknown_function_(DUF2697)]	1	1	0	1	0	1	0	1
PF11093.3|Mitochondr_Som1[Mitochondrial_export_protein_Som1]	1	1	1	0	0	1	0	1
PF04909.9|Amidohydro_2[Amidohydrolase]	0	1	1	0	0	1	1	0
PF10186.4|Atg14[UV_radiation_resistance_protein_and_autophagy-related_subunit_14]	1	1	0	0	0	0	0	2
PF01188.16|MR_MLE[Mandelate_racemase_/_muconate_lactonizing_enzyme,_C-terminal_domain]	0	1	0	0	0	1	1	0
PF02746.11|MR_MLE_N[Mandelate_racemase_/_muconate_lactonizing_enzyme,_N-terminal_domain]	0	1	0	0	0	1	1	0
PF03660.9|PHF5[PHF5-like_protein]	0	0	1	0	0	1	1	0
PF05592.6|Bac_rhamnosid[Bacterial_alpha-L-rhamnosidase]	0	1	0	0	0	1	1	0
PF08531.5|Bac_rhamnosid_N[Alpha-L-rhamnosidase_N-terminal_domain]	0	1	0	0	0	1	1	0
PF13378.1|MR_MLE_C[Enolase_C-terminal_domain-like]	0	1	0	0	0	1	1	0
PF00633.18|HHH[Helix-hairpin-helix_motif]	0	0	0	0	0	1	0	1
PF01020.12|Ribosomal_L40e[Ribosomal_L40e_family]	0	0	0	0	0	1	0	1
PF01216.12|Calsequestrin[Calsequestrin]	0	0	0	0	0	1	0	1
PF01977.11|UbiD[3-octaprenyl-4-hydroxybenzoate_carboxy-lyase]	0	0	0	0	0	1	0	1
PF02129.13|Peptidase_S15[X-Pro_dipeptidyl-peptidase_(S15_family)]	0	0	0	0	0	1	0	1
PF02627.15|CMD[Carboxymuconolactone_decarboxylase_family]	0	0	0	0	0	1	0	1
PF02736.14|Myosin_N[Myosin_N-terminal_SH3-like_domain]	0	0	0	0	0	1	0	1
PF02809.15|UIM[Ubiquitin_interaction_motif]	0	0	0	0	0	1	0	1
PF03088.11|Str_synth[Strictosidine_synthase]	0	0	0	0	0	1	0	1
PF03248.8|Rer1[Rer1_family]	0	0	0	0	0	1	0	1
PF03815.14|LCCL[LCCL_domain]	0	0	0	0	0	1	0	1
PF04061.9|ORMDL[ORMDL_family]	0	0	0	0	0	0	1	1
PF05051.8|COX17[Cytochrome_C_oxidase_copper_chaperone_(COX17)]	0	0	0	0	0	1	0	1
PF05934.6|MCLC[Mid-1-related_chloride_channel_(MCLC)]	0	0	0	0	0	1	0	1
PF06456.8|Arfaptin[Arfaptin-like_domain]	0	0	0	0	0	1	0	1
PF06838.6|Met_gamma_lyase[Methionine_gamma-lyase]	0	0	0	0	0	1	0	1
PF07749.7|ERp29[Endoplasmic_reticulum_protein_ERp29,_C-terminal_domain]	0	0	0	0	0	1	0	1
PF12740.2|Chlorophyllase2[Chlorophyllase_enzyme]	0	0	0	0	0	1	1	0
PF12897.2|Aminotran_MocR[Alanine-glyoxylate_amino-transferase]	0	0	0	0	0	1	0	1
PF13964.1|Kelch_6[Kelch_motif]	3	2	3	3	3	1	1	1
PF00564.19|PB1[PB1_domain]	2	2	2	2	2	1	1	1
PF00887.14|ACBP[Acyl_CoA_binding_protein]	2	2	2	2	2	1	1	1
PF01284.18|MARVEL[Membrane-associating_domain]	2	2	2	2	2	1	1	1
PF01485.16|IBR[IBR_domain]	2	2	2	2	2	1	1	1
PF02836.12|Glyco_hydro_2_C[Glycosyl_hydrolases_family_2,_TIM_barrel_domain]	2	2	2	2	2	1	1	1
PF03127.9|GAT[GAT_domain]	2	2	2	2	2	1	1	1
PF04145.10|Ctr[Ctr_copper_transporter_family]	2	2	2	2	2	1	1	1
PF07521.7|RMMBL[RNA-metabolising_metallo-beta-lactamase]	2	2	2	2	2	1	1	1
PF08245.7|Mur_ligase_M[Mur_ligase_middle_domain]	2	2	2	2	2	0	2	1
PF08520.5|DUF1748[Fungal_protein_of_unknown_function_(DUF1748)]	2	2	2	2	2	1	1	1
PF08616.5|SPA[Stabilization_of_polarity_axis]	2	2	2	2	2	1	1	1
PF10075.4|PCI_Csn8[COP9_signalosome,_subunit_CSN8]	2	2	2	2	2	1	1	1
PF10367.4|Vps39_2[Vacuolar_sorting_protein_39_domain_2]	2	2	2	2	2	1	1	1
PF10559.4|Plug_translocon[Plug_domain_of_Sec61p]	2	2	2	2	2	1	1	1
PF10644.4|Misat_Tub_SegII[Misato_Segment_II_tubulin-like_domain]	2	2	2	2	2	1	1	1
PF12273.3|RCR[Chitin_synthesis_regulation,_resistance_to_Congo_red]	2	2	2	2	2	1	1	1
PF13380.1|CoA_binding_2[CoA_binding_domain]	2	2	2	2	2	1	1	1
PF13420.1|Acetyltransf_4[Acetyltransferase_(GNAT)_domain]	2	2	2	2	2	0	2	1
PF14033.1|DUF4246[Protein_of_unknown_function_(DUF4246)]	2	2	2	2	2	1	1	1
PF00089.21|Trypsin[Trypsin]	2	2	1	2	2	1	1	1
PF00668.15|Condensation[Condensation_domain]	2	2	1	2	2	1	1	1
PF02150.11|RNA_POL_M_15KD[RNA_polymerases_M/15_Kd_subunit]	1	2	2	2	2	1	1	1
PF12804.2|NTP_transf_3[MobA-like_NTP_transferase_domain]	2	2	1	2	2	1	1	1
TIGR02180[GRX_euk:_glutaredoxin]	2	2	2	1	2	1	1	1
PF00244.15|14-3-3[14-3-3_protein]	1	3	1	1	1	1	1	1
PF00334.14|NDK[Nucleoside_diphosphate_kinase]	1	3	1	1	1	1	1	1
PF00705.13|PCNA_N[Proliferating_cell_nuclear_antigen,_N-terminal_domain]	1	2	1	2	1	1	1	1
PF02747.10|PCNA_C[Proliferating_cell_nuclear_antigen,_C-terminal_domain]	1	2	1	2	1	1	1	1
PF08639.5|SLD3[DNA_replication_regulator_SLD3]	1	3	1	1	1	1	1	1
PF08647.6|BRE1[BRE1_E3_ubiquitin_ligase]	1	3	1	1	1	1	1	1
PF09090.6|MIF4G_like_2[MIF4G_like]	1	3	1	1	1	1	1	1
TIGR00590[pcna:_proliferating_cell_nuclear_antigen_(pcna)]	1	2	1	2	1	1	1	1
PF00994.19|MoCF_biosynth[Probable_molybdopterin_binding_domain]	1	2	1	1	1	1	1	1
PF01960.13|ArgJ[ArgJ_family]	1	1	1	2	1	1	1	1
PF02272.14|DHHA1[DHHA1_domain]	1	2	1	1	1	1	1	1
PF02574.11|S-methyl_trans[Homocysteine_S-methyltransferase]	1	2	1	1	1	1	1	1
PF03462.13|PCRF[PCRF_domain]	1	1	1	2	1	1	1	1
PF08574.5|DUF1762[Protein_of_unknown_function_(DUF1762)]	1	1	1	2	1	1	1	1
PF09088.6|MIF4G_like[MIF4G_like]	1	2	1	1	1	1	1	1
PF10306.4|FLILHELTA[Hypothetical_protein_FLILHELTA]	1	2	1	1	1	1	1	1
PF11700.3|ATG22[Vacuole_effluxer_Atg22_like]	1	1	2	1	1	1	1	1
TIGR00120[ArgJ:_glutamate_N-acetyltransferase/amino-acid_acetyltransferase]	1	1	1	2	1	1	1	1
PF00034.16|Cytochrom_C[Cytochrome_c]	1	1	1	1	1	1	1	1
PF00075.19|RNase_H[RNase_H]	1	1	1	1	1	1	1	1
PF00077.15|RVP[Retroviral_aspartyl_protease]	1	1	1	1	1	1	1	1
PF00081.17|Sod_Fe_N[Iron/manganese_superoxide_dismutases,_alpha-hairpin_domain]	1	1	1	1	1	1	1	1
PF00113.17|Enolase_C[Enolase,_C-terminal_TIM_barrel_domain]	1	1	1	1	1	1	1	1
PF00120.19|Gln-synt_C[Glutamine_synthetase,_catalytic_domain]	1	1	1	1	1	1	1	1
PF00121.13|TIM[Triosephosphate_isomerase]	1	1	1	1	1	1	1	1
PF00130.17|C1_1[Phorbol_esters/diacylglycerol_binding_domain_(C1_domain)]	1	1	1	1	1	1	1	1
PF00144.19|Beta-lactamase[Beta-lactamase]	1	1	1	1	1	1	1	1
PF00154.16|RecA[recA_bacterial_DNA_recombination_protein]	1	1	1	1	1	1	1	1
PF00162.14|PGK[Phosphoglycerate_kinase]	1	1	1	1	1	1	1	1
PF00166.16|Cpn10[Chaperonin_10_Kd_subunit]	1	1	1	1	1	1	1	1
PF00183.13|HSP90[Hsp90_protein]	1	1	1	1	1	1	1	1
PF00186.14|DHFR_1[Dihydrofolate_reductase]	1	1	1	1	1	1	1	1
PF00189.15|Ribosomal_S3_C[Ribosomal_protein_S3,_C-terminal_domain]	1	1	1	1	1	1	1	1
PF00199.14|Catalase[Catalase]	1	1	1	1	1	1	1	1
PF00201.13|UDPGT[UDP-glucoronosyl_and_UDP-glucosyl_transferase]	1	1	1	1	1	1	1	1
PF00204.20|DNA_gyraseB[DNA_gyrase_B]	1	1	1	1	1	1	1	1
PF00211.15|Guanylate_cyc[Adenylate_and_Guanylate_cyclase_catalytic_domain]	1	1	1	1	1	1	1	1
PF00213.13|OSCP[ATP_synthase_delta_(OSCP)_subunit]	1	1	1	1	1	1	1	1
PF00215.19|OMPdecase[Orotidine_5'-phosphate_decarboxylase_/_HUMPS_family]	1	1	1	1	1	1	1	1
PF00218.16|IGPS[Indole-3-glycerol_phosphate_synthase]	1	1	1	1	1	1	1	1
PF00224.16|PK[Pyruvate_kinase,_barrel_domain]	1	1	1	1	1	1	1	1
PF00230.15|MIP[Major_intrinsic_protein]	1	1	1	1	1	1	1	1
PF00231.14|ATP-synt[ATP_synthase]	1	1	1	1	1	1	1	1
PF00233.14|PDEase_I[3'5'-cyclic_nucleotide_phosphodiesterase]	1	1	1	1	1	1	1	1
PF00235.14|Profilin[Profilin]	1	1	1	1	1	1	1	1
PF00245.15|Alk_phosphatase[Alkaline_phosphatase]	1	1	1	1	1	1	1	1
PF00246.19|Peptidase_M14[Zinc_carboxypeptidase]	1	1	1	1	1	1	1	1
PF00262.13|Calreticulin[Calreticulin_family]	1	1	1	1	1	1	1	1
PF00268.16|Ribonuc_red_sm[Ribonucleotide_reductase,_small_chain]	1	1	1	1	1	1	1	1
PF00275.15|EPSP_synthase[EPSP_synthase_(3-phosphoshikimate_1-carboxyvinyltransferase)]	1	1	1	1	1	1	1	1
PF00278.17|Orn_DAP_Arg_deC[Pyridoxal-dependent_decarboxylase,_C-terminal_sheet_domain]	1	1	1	1	1	1	1	1
PF00281.14|Ribosomal_L5[Ribosomal_protein_L5]	1	1	1	1	1	1	1	1
PF00285.16|Citrate_synt[Citrate_synthase]	1	1	1	1	1	1	1	1
PF00290.15|Trp_syntA[Tryptophan_synthase_alpha_chain]	1	1	1	1	1	1	1	1
PF00303.14|Thymidylat_synt[Thymidylate_synthase]	1	1	1	1	1	1	1	1
PF00316.15|FBPase[Fructose-1-6-bisphosphatase]	1	1	1	1	1	1	1	1
PF00329.14|Complex1_30kDa[Respiratory-chain_NADH_dehydrogenase,_30_Kd_subunit]	1	1	1	1	1	1	1	1
PF00342.14|PGI[Phosphoglucose_isomerase]	1	1	1	1	1	1	1	1
PF00343.15|Phosphorylase[Carbohydrate_phosphorylase]	1	1	1	1	1	1	1	1
PF00346.14|Complex1_49kDa[Respiratory-chain_NADH_dehydrogenase,_49_Kd_subunit]	1	1	1	1	1	1	1	1
PF00352.16|TBP[Transcription_factor_TFIID_(or_TATA-binding_protein,_TBP)]	1	1	1	1	1	1	1	1
PF00368.13|HMG-CoA_red[Hydroxymethylglutaryl-coenzyme_A_reductase]	1	1	1	1	1	1	1	1
PF00384.17|Molybdopterin[Molybdopterin_oxidoreductase]	1	1	1	1	1	1	1	1
PF00387.14|PI-PLC-Y[Phosphatidylinositol-specific_phospholipase_C,_Y_domain]	1	1	1	1	1	1	1	1
PF00390.14|malic[Malic_enzyme,_N-terminal_domain]	1	1	1	1	1	1	1	1
PF00393.14|6PGD[6-phosphogluconate_dehydrogenase,_C-terminal_domain]	1	1	1	1	1	1	1	1
PF00411.14|Ribosomal_S11[Ribosomal_protein_S11]	1	1	1	1	1	1	1	1
PF00436.20|SSB[Single-strand_binding_protein_family]	1	1	1	1	1	1	1	1
PF00438.15|S-AdoMet_synt_N[S-adenosylmethionine_synthetase,_N-terminal_domain]	1	1	1	1	1	1	1	1
PF00441.19|Acyl-CoA_dh_1[Acyl-CoA_dehydrogenase,_C-terminal_domain]	1	1	1	1	1	1	1	1
PF00456.16|Transketolase_N[Transketolase,_thiamine_diphosphate_binding_domain]	1	1	1	1	1	1	1	1
PF00459.20|Inositol_P[Inositol_monophosphatase_family]	1	1	1	1	1	1	1	1
PF00463.16|ICL[Isocitrate_lyase_family]	1	1	1	1	1	1	1	1
PF00475.13|IGPD[Imidazoleglycerol-phosphate_dehydratase]	1	1	1	1	1	1	1	1
PF00476.15|DNA_pol_A[DNA_polymerase_family_A]	1	1	1	1	1	1	1	1
PF00479.17|G6PD_N[Glucose-6-phosphate_dehydrogenase,_NAD_binding_domain]	1	1	1	1	1	1	1	1
PF00484.14|Pro_CA[Carbonic_anhydrase]	1	1	1	1	1	1	1	1
PF00490.16|ALAD[Delta-aminolevulinic_acid_dehydratase]	1	1	1	1	1	1	1	1
PF00520.26|Ion_trans[Ion_transport_protein]	1	1	1	1	1	1	1	1
PF00521.15|DNA_topoisoIV[DNA_gyrase/topoisomerase_IV,_subunit_A]	1	1	1	1	1	1	1	1
PF00538.14|Linker_histone[linker_histone_H1_and_H5_family]	1	1	1	1	1	1	1	1
PF00542.14|Ribosomal_L12[Ribosomal_protein_L7/L12_C-terminal_domain]	1	1	1	1	1	1	1	1
PF00567.19|TUDOR[Tudor_domain]	1	1	1	1	1	1	1	1
PF00576.16|Transthyretin[HIUase/Transthyretin_family]	1	1	1	1	1	1	1	1
PF00585.13|Thr_dehydrat_C[C-terminal_regulatory_domain_of_Threonine_dehydratase]	1	1	1	1	1	1	1	1
PF00591.16|Glycos_transf_3[Glycosyl_transferase_family,_a/b_domain]	1	1	1	1	1	1	1	1
PF00595.19|PDZ[PDZ_domain_(Also_known_as_DHR_or_GLGF)]	1	1	1	1	1	1	1	1
PF00614.17|PLDc[Phospholipase_D_Active_site_motif]	1	1	1	1	1	1	1	1
PF00625.16|Guanylate_kin[Guanylate_kinase]	1	1	1	1	1	1	1	1
PF00635.21|Motile_Sperm[MSP_(Major_sperm_protein)_domain]	1	1	1	1	1	1	1	1
PF00636.21|Ribonuclease_3[Ribonuclease_III_domain]	1	1	1	1	1	1	1	1
PF00639.16|Rotamase[PPIC-type_PPIASE_domain]	1	1	1	1	1	1	1	1
PF00641.13|zf-RanBP[Zn-finger_in_Ran_binding_protein_and_others]	1	1	1	1	1	1	1	1
PF00647.14|EF1G[Elongation_factor_1_gamma,_conserved_domain]	1	1	1	1	1	1	1	1
PF00653.16|BIR[Inhibitor_of_Apoptosis_domain]	1	1	1	1	1	1	1	1
PF00656.17|Peptidase_C14[Caspase_domain]	1	1	1	1	1	1	1	1
PF00657.17|Lipase_GDSL[GDSL-like_Lipase/Acylhydrolase]	1	1	1	1	1	1	1	1
PF00658.13|PABP[Poly-adenylate_binding_protein,_unique_domain]	1	1	1	1	1	1	1	1
PF00659.13|POLO_box[POLO_box_duplicated_region]	1	1	1	1	1	1	1	1
PF00660.12|SRP1_TIP1[Seripauperin_and_TIP1_family]	1	1	1	1	1	1	1	1
PF00672.20|HAMP[HAMP_domain]	1	1	1	1	1	1	1	1
PF00677.12|Lum_binding[Lumazine_binding_domain]	1	1	1	1	1	1	1	1
PF00692.14|dUTPase[dUTPase]	1	1	1	1	1	1	1	1
PF00697.17|PRAI[N-(5'phosphoribosyl)anthranilate_(PRA)_isomerase]	1	1	1	1	1	1	1	1
PF00709.16|Adenylsucc_synt[Adenylosuccinate_synthetase]	1	1	1	1	1	1	1	1
PF00710.15|Asparaginase[Asparaginase]	1	1	1	1	1	1	1	1
PF00723.16|Glyco_hydro_15[Glycosyl_hydrolases_family_15]	1	1	1	1	1	1	1	1
PF00731.15|AIRC[AIR_carboxylase]	1	1	1	1	1	1	1	1
PF00732.14|GMC_oxred_N[GMC_oxidoreductase]	1	1	1	1	1	1	1	1
PF00736.14|EF1_GNE[EF-1_guanine_nucleotide_exchange_domain]	1	1	1	1	1	1	1	1
PF00742.14|Homoserine_dh[Homoserine_dehydrogenase]	1	1	1	1	1	1	1	1
PF00750.14|tRNA-synt_1d[tRNA_synthetases_class_I_(R)]	1	1	1	1	1	1	1	1
PF00762.14|Ferrochelatase[Ferrochelatase]	1	1	1	1	1	1	1	1
PF00764.14|Arginosuc_synth[Arginosuccinate_synthase]	1	1	1	1	1	1	1	1
PF00766.14|ETF_alpha[Electron_transfer_flavoprotein_FAD-binding_domain]	1	1	1	1	1	1	1	1
PF00792.19|PI3K_C2[Phosphoinositide_3-kinase_C2]	1	1	1	1	1	1	1	1
PF00809.17|Pterin_bind[Pterin_binding_enzyme]	1	1	1	1	1	1	1	1
PF00810.13|ER_lumen_recept[ER_lumen_protein_retaining_receptor]	1	1	1	1	1	1	1	1
PF00815.15|Histidinol_dh[Histidinol_dehydrogenase]	1	1	1	1	1	1	1	1
PF00827.12|Ribosomal_L15e[Ribosomal_L15]	1	1	1	1	1	1	1	1
PF00830.14|Ribosomal_L28[Ribosomal_L28_family]	1	1	1	1	1	1	1	1
PF00831.18|Ribosomal_L29[Ribosomal_L29_protein]	1	1	1	1	1	1	1	1
PF00833.13|Ribosomal_S17e[Ribosomal_S17]	1	1	1	1	1	1	1	1
PF00834.14|Ribul_P_3_epim[Ribulose-phosphate_3_epimerase_family]	1	1	1	1	1	1	1	1
PF00838.12|TCTP[Translationally_controlled_tumour_protein]	1	1	1	1	1	1	1	1
PF00848.14|Ring_hydroxyl_A[Ring_hydroxylating_alpha_subunit_(catalytic_domain)]	1	1	1	1	1	1	1	1
PF00857.15|Isochorismatase[Isochorismatase_family]	1	1	1	1	1	1	1	1
PF00861.17|Ribosomal_L18p[Ribosomal_L18p/L5e_family]	1	1	1	1	1	1	1	1
PF00875.13|DNA_photolyase[DNA_photolyase]	1	1	1	1	1	1	1	1
PF00878.13|CIMR[Cation-independent_mannose-6-phosphate_receptor_repeat]	1	1	1	1	1	1	1	1
PF00885.14|DMRL_synthase[6,7-dimethyl-8-ribityllumazine_synthase]	1	1	1	1	1	1	1	1
PF00886.14|Ribosomal_S16[Ribosomal_protein_S16]	1	1	1	1	1	1	1	1
PF00910.17|RNA_helicase[RNA_helicase]	1	1	1	1	1	1	1	1
PF00917.21|MATH[MATH_domain]	1	1	1	1	1	1	1	1
PF00920.16|ILVD_EDD[Dehydratase_family]	1	1	1	1	1	1	1	1
PF00923.14|Transaldolase[Transaldolase]	1	1	1	1	1	1	1	1
PF00925.15|GTP_cyclohydro2[GTP_cyclohydrolase_II]	1	1	1	1	1	1	1	1
PF00926.14|DHBP_synthase[3,4-dihydroxy-2-butanone_4-phosphate_synthase]	1	1	1	1	1	1	1	1
PF00935.14|Ribosomal_L44[Ribosomal_protein_L44]	1	1	1	1	1	1	1	1
PF00953.16|Glycos_transf_4[Glycosyl_transferase_family_4]	1	1	1	1	1	1	1	1
PF00955.16|HCO3_cotransp[HCO3-_transporter_family]	1	1	1	1	1	1	1	1
PF00958.17|GMP_synt_C[GMP_synthase_C_terminal_domain]	1	1	1	1	1	1	1	1
PF00975.15|Thioesterase[Thioesterase_domain]	1	1	1	1	1	2	0	1
PF00989.19|PAS[PAS_fold]	1	1	1	1	1	1	1	1
PF01014.13|Uricase[Uricase]	1	1	1	1	1	1	1	1
PF01015.13|Ribosomal_S3Ae[Ribosomal_S3Ae_family]	1	1	1	1	1	1	1	1
PF01016.14|Ribosomal_L27[Ribosomal_L27_protein]	1	1	1	1	1	1	1	1
PF01018.17|GTP1_OBG[GTP1/OBG]	1	1	1	1	1	1	1	1
PF01025.14|GrpE[GrpE]	1	1	1	1	1	1	1	1
PF01027.15|Bax1-I[Inhibitor_of_apoptosis-promoting_Bax1]	1	1	1	1	1	1	1	1
PF01028.15|Topoisom_I[Eukaryotic_DNA_topoisomerase_I,_catalytic_core]	1	1	1	1	1	1	1	1
PF01039.17|Carboxyl_trans[Carboxyl_transferase_domain]	1	1	1	1	1	1	1	1
PF01058.17|Oxidored_q6[NADH_ubiquinone_oxidoreductase,_20_Kd_subunit]	1	1	1	1	1	1	1	1
PF01071.14|GARS_A[Phosphoribosylglycinamide_synthetase,_ATP-grasp_(A)_domain]	1	1	1	1	1	1	1	1
PF01074.17|Glyco_hydro_38[Glycosyl_hydrolases_family_38_N-terminal_domain]	1	1	1	1	1	1	1	1
PF01077.17|NIR_SIR[Nitrite_and_sulphite_reductase_4Fe-4S_domain]	1	1	1	1	1	1	1	1
PF01084.15|Ribosomal_S18[Ribosomal_protein_S18]	1	1	1	1	1	1	1	1
PF01086.12|Clathrin_lg_ch[Clathrin_light_chain]	1	1	1	1	1	1	1	1
PF01090.14|Ribosomal_S19e[Ribosomal_protein_S19e]	1	1	1	1	1	1	1	1
PF01092.14|Ribosomal_S6e[Ribosomal_protein_S6e]	1	1	1	1	1	1	1	1
PF01111.14|CKS[Cyclin-dependent_kinase_regulatory_subunit]	1	1	1	1	1	1	1	1
PF01112.13|Asparaginase_2[Asparaginase]	1	1	1	1	1	1	1	1
PF01115.12|F_actin_cap_B[F-actin_capping_protein,_beta_subunit]	1	1	1	1	1	1	1	1
PF01116.15|F_bP_aldolase[Fructose-bisphosphate_aldolase_class-II]	1	1	1	1	1	1	1	1
PF01121.15|CoaE[Dephospho-CoA_kinase]	1	1	1	1	1	1	1	1
PF01125.12|G10[G10_protein]	1	1	1	1	1	1	1	1
PF01126.15|Heme_oxygenase[Heme_oxygenase]	1	1	1	1	1	1	1	1
PF01127.17|Sdh_cyt[Succinate_dehydrogenase/Fumarate_reductase_transmembrane_subunit]	1	1	1	1	1	1	1	1
PF01131.15|Topoisom_bac[DNA_topoisomerase]	1	1	1	1	1	1	1	1
PF01137.16|RTC[RNA_3'-terminal_phosphate_cyclase]	1	1	1	1	1	1	1	1
PF01142.13|TruD[tRNA_pseudouridine_synthase_D_(TruD)]	1	1	1	1	1	1	1	1
PF01149.19|Fapy_DNA_glyco[Formamidopyrimidine-DNA_glycosylase_N-terminal_domain]	1	1	1	1	1	1	1	1
PF01154.12|HMG_CoA_synt_N[Hydroxymethylglutaryl-coenzyme_A_synthase_N_terminal]	1	1	1	1	1	1	1	1
PF01156.14|IU_nuc_hydro[Inosine-uridine_preferring_nucleoside_hydrolase]	1	1	1	1	1	1	1	1
PF01158.13|Ribosomal_L36e[Ribosomal_protein_L36e]	1	1	1	1	1	1	1	1
PF01159.14|Ribosomal_L6e[Ribosomal_protein_L6e]	1	1	1	1	1	1	1	1
PF01165.15|Ribosomal_S21[Ribosomal_protein_S21]	1	1	1	1	1	1	1	1
PF01169.14|UPF0016[Uncharacterized_protein_family_UPF0016]	1	1	1	1	1	1	1	1
PF01174.14|SNO[SNO_glutamine_amidotransferase_family]	1	1	1	1	1	1	1	1
PF01176.14|eIF-1a[Translation_initiation_factor_1A_/_IF-1]	1	1	1	1	1	1	1	1
PF01177.17|Asp_Glu_race[Asp/Glu/Hydantoin_racemase]	1	1	1	1	1	1	1	1
PF01180.16|DHO_dh[Dihydroorotate_dehydrogenase]	1	1	1	1	1	1	1	1
PF01191.14|RNA_pol_Rpb5_C[RNA_polymerase_Rpb5,_C-terminal_domain]	1	1	1	1	1	1	1	1
PF01192.17|RNA_pol_Rpb6[RNA_polymerase_Rpb6]	1	1	1	1	1	1	1	1
PF01196.14|Ribosomal_L17[Ribosomal_protein_L17]	1	1	1	1	1	1	1	1
PF01198.14|Ribosomal_L31e[Ribosomal_protein_L31e]	1	1	1	1	1	1	1	1
PF01199.13|Ribosomal_L34e[Ribosomal_protein_L34e]	1	1	1	1	1	1	1	1
PF01208.12|URO-D[Uroporphyrinogen_decarboxylase_(URO-D)]	1	1	1	1	1	1	1	1
PF01213.14|CAP_N[Adenylate_cyclase_associated_(CAP)_N_terminal]	1	1	1	1	1	1	1	1
PF01215.14|COX5B[Cytochrome_c_oxidase_subunit_Vb]	1	1	1	1	1	1	1	1
PF01218.13|Coprogen_oxidas[Coproporphyrinogen_III_oxidase]	1	1	1	1	1	1	1	1
PF01220.14|DHquinase_II[Dehydroquinase_class_II]	1	1	1	1	1	1	1	1
PF01223.18|Endonuclease_NS[DNA/RNA_non-specific_endonuclease]	1	1	1	1	1	1	1	1
PF01226.12|Form_Nir_trans[Formate/nitrite_transporter]	1	1	1	1	1	1	1	1
PF01227.17|GTP_cyclohydroI[GTP_cyclohydrolase_I]	1	1	1	1	1	1	1	1
PF01231.13|IDO[Indoleamine_2,3-dioxygenase]	1	1	1	1	1	1	1	1
PF01233.14|NMT[Myristoyl-CoA:protein_N-myristoyltransferase,_N-terminal_domain]	1	1	1	1	1	1	1	1
PF01238.16|PMI_typeI[Phosphomannose_isomerase_type_I]	1	1	1	1	1	1	1	1
PF01245.15|Ribosomal_L19[Ribosomal_protein_L19]	1	1	1	1	1	1	1	1
PF01247.13|Ribosomal_L35Ae[Ribosomal_protein_L35Ae]	1	1	1	1	1	1	1	1
PF01250.12|Ribosomal_S6[Ribosomal_protein_S6]	1	1	1	1	1	1	1	1
PF01251.13|Ribosomal_S7e[Ribosomal_protein_S7e]	1	1	1	1	1	1	1	1
PF01256.12|Carb_kinase[Carbohydrate_kinase]	1	1	1	1	1	1	1	1
PF01257.14|2Fe-2S_thioredx[Thioredoxin-like_[2Fe-2S]_ferredoxin]	1	1	1	1	1	1	1	1
PF01259.13|SAICAR_synt[SAICAR_synthetase]	1	1	1	1	1	1	1	1
PF01261.19|AP_endonuc_2[Xylose_isomerase-like_TIM_barrel]	1	1	1	1	1	1	1	1
PF01263.15|Aldose_epim[Aldose_1-epimerase]	1	1	1	1	1	1	1	1
PF01264.16|Chorismate_synt[Chorismate_synthase]	1	1	1	1	1	1	1	1
PF01269.12|Fibrillarin[Fibrillarin]	1	1	1	1	1	1	1	1
PF01274.17|Malate_synthase[Malate_synthase]	1	1	1	1	1	1	1	1
PF01280.15|Ribosomal_L19e[Ribosomal_protein_L19e]	1	1	1	1	1	1	1	1
PF01281.14|Ribosomal_L9_N[Ribosomal_protein_L9,_N-terminal_domain]	1	1	1	1	1	1	1	1
PF01282.14|Ribosomal_S24e[Ribosomal_protein_S24e]	1	1	1	1	1	1	1	1
PF01283.14|Ribosomal_S26e[Ribosomal_protein_S26e]	1	1	1	1	1	1	1	1
PF01285.13|TEA[TEA/ATTS_domain_family]	1	1	1	1	1	1	1	1
PF01287.15|eIF-5a[Eukaryotic_elongation_factor_5A_hypusine,_DNA-binding_OB_fold]	1	1	1	1	1	1	1	1
PF01288.15|HPPK[7,8-dihydro-6-hydroxymethylpterin-pyrophosphokinase_(HPPK)]	1	1	1	1	1	1	1	1
PF01293.15|PEPCK_ATP[Phosphoenolpyruvate_carboxykinase]	1	1	1	1	1	1	1	1
PF01294.13|Ribosomal_L13e[Ribosomal_protein_L13e]	1	1	1	1	1	1	1	1
PF01300.13|Sua5_yciO_yrdC[Telomere_recombination]	1	1	1	1	1	1	1	1
PF01331.14|mRNA_cap_enzyme[mRNA_capping_enzyme,_catalytic_domain]	1	1	1	1	1	1	1	1
PF01351.13|RNase_HII[Ribonuclease_HII]	1	1	1	1	1	1	1	1
PF01368.15|DHH[DHH_family]	1	1	1	1	1	1	1	1
PF01379.15|Porphobil_deam[Porphobilinogen_deaminase,_dipyromethane_cofactor_binding_domain]	1	1	1	1	1	1	1	1
PF01381.17|HTH_3[Helix-turn-helix]	1	1	1	1	1	1	1	1
PF01384.15|PHO4[Phosphate_transporter_family]	1	1	1	1	1	1	1	1
PF01391.13|Collagen[Collagen_triple_helix_repeat_(20_copies)]	1	1	1	1	1	0	2	1
PF01424.17|R3H[R3H_domain]	1	1	1	1	1	1	1	1
PF01450.14|IlvC[Acetohydroxy_acid_isomeroreductase,_catalytic_domain]	1	1	1	1	1	1	1	1
PF01451.16|LMWPc[Low_molecular_weight_phosphotyrosine_protein_phosphatase]	1	1	1	1	1	1	1	1
PF01465.15|GRIP[GRIP_domain]	1	1	1	1	1	1	1	1
PF01466.14|Skp1[Skp1_family,_dimerisation_domain]	1	1	1	1	1	1	1	1
PF01487.10|DHquinase_I[Type_I_3-dehydroquinase]	1	1	1	1	1	1	1	1
PF01493.14|GXGXG[GXGXG_motif]	1	1	1	1	1	1	1	1
PF01502.13|PRA-CH[Phosphoribosyl-AMP_cyclohydrolase]	1	1	1	1	1	1	1	1
PF01503.12|PRA-PH[Phosphoribosyl-ATP_pyrophosphohydrolase]	1	1	1	1	1	1	1	1
PF01512.12|Complex1_51K[Respiratory-chain_NADH_dehydrogenase_51_Kd_subunit]	1	1	1	1	1	1	1	1
PF01522.16|Polysacc_deac_1[Polysaccharide_deacetylase]	1	1	1	1	1	1	1	1
PF01536.11|SAM_decarbox[Adenosylmethionine_decarboxylase]	1	1	1	1	1	1	1	1
PF01557.13|FAA_hydrolase[Fumarylacetoacetate_(FAA)_hydrolase_family]	1	1	1	1	1	1	1	1
PF01588.15|tRNA_bind[Putative_tRNA_binding_domain]	1	1	1	1	1	1	1	1
PF01592.11|NifU_N[NifU-like_N_terminal_domain]	1	1	1	1	1	1	1	1
PF01595.15|DUF21[Domain_of_unknown_function_DUF21]	1	1	1	1	1	1	1	1
PF01596.12|Methyltransf_3[O-methyltransferase]	1	1	1	1	1	1	1	1
PF01599.14|Ribosomal_S27[Ribosomal_protein_S27a]	1	1	1	1	1	1	1	1
PF01603.15|B56[Protein_phosphatase_2A_regulatory_B_subunit_(B56_family)]	1	1	1	1	1	1	1	1
PF01608.12|I_LWEQ[I/LWEQ_domain]	1	1	1	1	1	1	1	1
PF01619.13|Pro_dh[Proline_dehydrogenase]	1	1	1	1	1	1	1	1
PF01625.16|PMSR[Peptide_methionine_sulfoxide_reductase]	1	1	1	1	1	1	1	1
PF01627.18|Hpt[Hpt_domain]	1	1	1	1	1	1	1	1
PF01634.13|HisG[ATP_phosphoribosyltransferase]	1	1	1	1	1	1	1	1
PF01641.13|SelR[SelR_domain]	1	1	1	1	1	1	1	1
PF01655.13|Ribosomal_L32e[Ribosomal_protein_L32]	1	1	1	1	1	1	1	1
PF01658.12|Inos-1-P_synth[Myo-inositol-1-phosphate_synthase]	1	1	1	1	1	1	1	1
PF01661.16|Macro[Macro_domain]	1	1	1	1	1	1	1	1
PF01680.12|SOR_SNZ[SOR/SNZ_family]	1	1	1	1	1	1	1	1
PF01693.11|Cauli_VI[Caulimovirus_viroplasmin]	1	1	1	1	1	1	1	1
PF01709.15|Transcrip_reg[Transcriptional_regulator]	1	1	1	1	1	1	1	1
PF01715.12|IPPT[IPP_transferase]	1	1	1	1	1	1	1	1
PF01717.13|Meth_synt_2[Cobalamin-independent_synthase,_Catalytic_domain]	1	1	1	1	1	1	1	1
PF01725.11|Ham1p_like[Ham1_family]	1	1	1	1	1	1	1	1
PF01729.14|QRPTase_C[Quinolinate_phosphoribosyl_transferase,_C-terminal_domain]	1	1	1	1	1	1	1	1
PF01743.15|PolyA_pol[Poly_A_polymerase_head_domain]	1	1	1	1	1	1	1	1
PF01746.16|tRNA_m1G_MT[tRNA_(Guanine-1)-methyltransferase]	1	1	1	1	1	1	1	1
PF01749.15|IBB[Importin_beta_binding_domain]	1	1	1	1	1	1	1	1
PF01753.13|zf-MYND[MYND_finger]	1	1	1	1	1	1	1	1
PF01761.15|DHQ_synthase[3-dehydroquinate_synthase]	1	1	1	1	1	1	1	1
PF01765.14|RRF[Ribosome_recycling_factor]	1	1	1	1	1	1	1	1
PF01773.15|Nucleos_tra2_N[Na+_dependent_nucleoside_transporter_N-terminus]	1	1	1	1	1	1	1	1
PF01775.12|Ribosomal_L18ae[Ribosomal_L18ae/LX_protein_domain]	1	1	1	1	1	1	1	1
PF01776.12|Ribosomal_L22e[Ribosomal_L22e_protein_family]	1	1	1	1	1	1	1	1
PF01777.13|Ribosomal_L27e[Ribosomal_L27e_protein_family]	1	1	1	1	1	1	1	1
PF01778.12|Ribosomal_L28e[Ribosomal_L28e_protein_family]	1	1	1	1	1	1	1	1
PF01780.14|Ribosomal_L37ae[Ribosomal_L37ae_protein_family]	1	1	1	1	1	1	1	1
PF01783.18|Ribosomal_L32p[Ribosomal_L32p_protein_family]	1	1	1	1	1	1	1	1
PF01784.13|NIF3[NIF3_(NGG1p_interacting_factor_3)]	1	1	1	1	1	1	1	1
PF01786.12|AOX[Alternative_oxidase]	1	1	1	1	1	1	1	1
PF01803.11|LIM_bind[LIM-domain_binding_protein]	1	1	1	1	1	1	1	1
PF01805.15|Surp[Surp_module]	1	1	1	1	1	1	1	1
PF01808.13|AICARFT_IMPCHas[AICARFT/IMPCHase_bienzyme]	1	1	1	1	1	1	1	1
PF01812.15|5-FTHF_cyc-lig[5-formyltetrahydrofolate_cyclo-ligase_family]	1	1	1	1	1	1	1	1
PF01813.12|ATP-synt_D[ATP_synthase_subunit_D]	1	1	1	1	1	1	1	1
PF01833.19|TIG[IPT/TIG_domain]	1	1	1	1	1	1	1	1
PF01841.14|Transglut_core[Transglutaminase-like_superfamily]	1	1	1	1	1	1	1	1
PF01868.11|UPF0086[Domain_of_unknown_function_UPF0086]	1	1	1	1	1	1	1	1
PF01871.12|AMMECR1[AMMECR1]	1	1	1	1	1	1	1	1
PF01872.12|RibD_C[RibD_C-terminal_domain]	1	1	1	1	1	1	1	1
PF01876.11|RNase_P_p30[RNase_P_subunit_p30]	1	1	1	1	1	1	1	1
PF01883.14|DUF59[Domain_of_unknown_function_DUF59]	1	1	1	1	1	1	1	1
PF01885.11|PTS_2-RNA[RNA_2'-phosphotransferase,_Tpt1_/_KptA_family]	1	1	1	1	1	1	1	1
PF01894.12|UPF0047[Uncharacterised_protein_family_UPF0047]	1	1	1	1	1	1	1	1
PF01896.14|DNA_primase_S[Eukaryotic_and_archaeal_DNA_primase_small_subunit]	1	1	1	1	1	1	1	1
PF01900.14|RNase_P_Rpp14[Rpp14/Pop5_family]	1	1	1	1	1	1	1	1
PF01902.12|ATP_bind_4[ATP-binding_region]	1	1	1	1	1	1	1	1
PF01910.12|DUF77[Domain_of_unknown_function_DUF77]	1	1	1	1	1	1	1	1
PF01912.13|eIF-6[eIF-6_family]	1	1	1	1	1	1	1	1
PF01916.12|DS[Deoxyhypusine_synthase]	1	1	1	1	1	1	1	1
PF01922.12|SRP19[SRP19_protein]	1	1	1	1	1	1	1	1
PF01929.12|Ribosomal_L14e[Ribosomal_protein_L14]	1	1	1	1	1	1	1	1
PF01933.13|UPF0052[Uncharacterised_protein_family_UPF0052]	1	1	1	1	1	1	1	1
PF01937.14|DUF89[Protein_of_unknown_function_DUF89]	1	1	1	1	1	1	1	1
PF01938.15|TRAM[TRAM_domain]	1	1	1	1	1	1	1	1
PF01956.11|DUF106[Integral_membrane_protein_DUF106]	1	1	1	1	1	1	1	1
PF01968.13|Hydantoinase_A[Hydantoinase/oxoprolinase]	1	1	1	1	1	1	1	1
PF01981.11|PTH2[Peptidyl-tRNA_hydrolase_PTH2]	1	1	1	1	1	1	1	1
PF01984.15|dsDNA_bind[Double-stranded_DNA-binding_domain]	1	1	1	1	1	1	1	1
PF01988.14|VIT1[VIT_family]	1	1	1	1	1	1	1	1
PF01990.12|ATP-synt_F[ATP_synthase_(F/14-kDa)_subunit]	1	1	1	1	1	1	1	1
PF01991.13|vATP-synt_E[ATP_synthase_(E/31_kDa)_subunit]	1	1	1	1	1	1	1	1
PF01992.11|vATP-synt_AC39[ATP_synthase_(C/AC39)_subunit]	1	1	1	1	1	1	1	1
PF02002.12|TFIIE_alpha[TFIIE_alpha_subunit]	1	1	1	1	1	1	1	1
PF02005.11|TRM[N2,N2-dimethylguanosine_tRNA_methyltransferase]	1	1	1	1	1	1	1	1
PF02045.10|CBFB_NFYA[CCAAT-binding_transcription_factor_(CBF-B/NF-YA)_subunit_B]	1	1	1	1	1	1	1	1
PF02046.10|COX6A[Cytochrome_c_oxidase_subunit_VIa]	1	1	1	1	1	1	1	1
PF02064.10|MAS20[MAS20_protein_import_receptor]	1	1	1	1	1	1	1	1
PF02076.10|STE3[Pheromone_A_receptor]	1	1	1	1	1	1	1	1
PF02077.10|SURF4[SURF4_family]	1	1	1	1	1	1	1	1
PF02089.10|Palm_thioest[Palmitoyl_protein_thioesterase]	1	1	1	1	1	1	1	1
PF02104.10|SURF1[SURF1_family]	1	1	1	1	1	1	1	1
PF02109.11|DAD[DAD_family]	1	1	1	1	1	1	1	1
PF02112.10|PDEase_II[cAMP_phosphodiesterases_class-II]	1	1	1	1	1	1	1	1
PF02116.10|STE2[Fungal_pheromone_mating_factor_STE2_GPCR]	1	1	1	1	1	1	1	1
PF02137.13|A_deamin[Adenosine-deaminase_(editase)_domain]	1	1	1	1	1	1	1	1
PF02138.13|Beach[Beige/BEACH_domain]	1	1	1	1	1	1	1	1
PF02144.11|Rad1[Repair_protein_Rad1/Rec1/Rad17]	1	1	1	1	1	1	1	1
PF02145.10|Rap_GAP[Rap/ran-GAP]	1	1	1	1	1	1	1	1
PF02149.14|KA1[Kinase_associated_domain_1]	1	1	1	1	1	1	1	1
PF02152.13|FolB[Dihydroneopterin_aldolase]	1	1	1	1	1	1	1	1
PF02153.12|PDH[Prephenate_dehydrogenase]	1	1	1	1	1	1	1	1
PF02157.10|Man-6-P_recep[Mannose-6-phosphate_receptor]	1	1	1	1	1	1	1	1
PF02167.10|Cytochrom_C1[Cytochrome_C1_family]	1	1	1	1	1	1	1	1
PF02179.11|BAG[BAG_domain]	1	1	1	1	1	1	1	1
PF02185.11|HR1[Hr1_repeat]	1	1	1	1	1	1	1	1
PF02186.10|TFIIE_beta[TFIIE_beta_subunit_core_domain]	1	1	1	1	1	1	1	1
PF02195.13|ParBc[ParB-like_nuclease_domain]	1	1	1	1	1	1	1	1
PF02197.12|RIIa[Regulatory_subunit_of_type_II_PKA_R-subunit]	1	1	1	1	1	1	1	1
PF02201.13|SWIB[SWIB/MDM2_domain]	1	1	1	1	1	1	1	1
PF02221.10|E1_DerP2_DerF2[ML_domain]	1	1	1	1	1	1	1	1
PF02223.12|Thymidylate_kin[Thymidylate_kinase]	1	1	1	1	1	1	1	1
PF02229.11|PC4[Transcriptional_Coactivator_p15_(PC4)]	1	1	1	1	1	1	1	1
PF02230.11|Abhydrolase_2[Phospholipase/Carboxylesterase]	1	1	1	1	1	1	1	1
PF02237.12|BPL_C[Biotin_protein_ligase_C_terminal_domain]	1	1	1	1	1	1	1	1
PF02263.14|GBP[Guanylate-binding_protein,_N-terminal_domain]	1	1	1	1	1	1	1	1
PF02270.10|TFIIF_beta[Transcription_initiation_factor_IIF,_beta_subunit]	1	1	1	1	1	1	1	1
PF02271.11|UCR_14kD[Ubiquinol-cytochrome_C_reductase_complex_14kD_subunit]	1	1	1	1	1	1	1	1
PF02284.11|COX5A[Cytochrome_c_oxidase_subunit_Va]	1	1	1	1	1	1	1	1
PF02290.10|SRP14[Signal_recognition_particle_14kD_protein]	1	1	1	1	1	1	1	1
PF02291.10|TFIID-31kDa[Transcription_initiation_factor_IID,_31kD_subunit]	1	1	1	1	1	1	1	1
PF02311.14|AraC_binding[AraC-like_ligand_binding_domain]	1	1	1	1	1	1	1	1
PF02320.11|UCR_hinge[Ubiquinol-cytochrome_C_reductase_hinge_protein]	1	1	1	1	1	1	1	1
PF02330.11|MAM33[Mitochondrial_glycoprotein]	1	1	1	1	1	1	1	1
PF02386.11|TrkH[Cation_transport_protein]	1	1	1	1	1	1	1	1
PF02390.12|Methyltransf_4[Putative_methyltransferase]	1	1	1	1	1	1	1	1
PF02410.10|Oligomerisation[Oligomerisation_domain]	1	1	1	1	1	1	1	1
PF02423.10|OCD_Mu_crystall[Ornithine_cyclodeaminase/mu-crystallin_family]	1	1	1	1	1	1	1	1
PF02431.10|Chalcone[Chalcone-flavanone_isomerase]	1	1	1	1	1	1	1	1
PF02436.13|PYC_OADA[Conserved_carboxylase_domain]	1	1	1	1	1	1	1	1
PF02453.12|Reticulon[Reticulon]	1	1	1	1	1	1	1	1
PF02460.13|Patched[Patched_family]	1	1	1	1	1	1	1	1
PF02464.12|CinA[Competence-damaged_protein]	1	1	1	1	1	1	1	1
PF02516.9|STT3[Oligosaccharyl_transferase_STT3_subunit]	1	1	1	1	1	1	1	1
PF02537.10|CRCB[CrcB-like_protein]	1	1	1	1	1	1	1	1
PF02538.9|Hydantoinase_B[Hydantoinase_B/oxoprolinase]	1	1	1	1	1	1	1	1
PF02545.9|Maf[Maf-like_protein]	1	1	1	1	1	1	1	1
PF02550.10|AcetylCoA_hydro[Acetyl-CoA_hydrolase/transferase_N-terminal_domain]	1	1	1	1	1	1	1	1
PF02567.11|PhzC-PhzF[Phenazine_biosynthesis-like_protein]	1	1	1	1	1	1	1	1
PF02569.10|Pantoate_ligase[Pantoate-beta-alanine_ligase]	1	1	1	1	1	1	1	1
PF02580.11|Tyr_Deacylase[D-Tyr-tRNA(Tyr)_deacylase]	1	1	1	1	1	1	1	1
PF02581.12|TMP-TENI[Thiamine_monophosphate_synthase/TENI]	1	1	1	1	1	1	1	1
PF02585.12|PIG-L[GlcNAc-PI_de-N-acetylase]	1	1	1	1	1	1	1	1
PF02586.9|DUF159[Uncharacterised_ACR,_COG2135]	1	1	1	1	1	1	1	1
PF02598.12|Methyltrn_RNA_3[Putative_RNA_methyltransferase]	1	1	1	1	1	1	1	1
PF02602.10|HEM4[Uroporphyrinogen-III_synthase_HemD]	1	1	1	1	1	1	1	1
PF02617.12|ClpS[ATP-dependent_Clp_protease_adaptor_protein_ClpS]	1	1	1	1	1	1	1	1
PF02626.10|AHS2[Allophanate_hydrolase_subunit_2]	1	1	1	1	1	1	1	1
PF02628.10|COX15-CtaA[Cytochrome_oxidase_assembly_protein]	1	1	1	1	1	1	1	1
PF02629.14|CoA_binding[CoA_binding_domain]	1	1	1	1	1	1	1	1
PF02630.9|SCO1-SenC[SCO1/SenC]	1	1	1	1	1	1	1	1
PF02637.13|GatB_Yqey[GatB_domain]	1	1	1	1	1	1	1	1
PF02671.16|PAH[Paired_amphipathic_helix_repeat]	1	1	1	1	1	1	1	1
PF02676.9|TYW3[Methyltransferase_TYW3]	1	1	1	1	1	1	1	1
PF02678.11|Pirin[Pirin]	1	1	1	1	1	1	1	1
PF02682.11|AHS1[Allophanate_hydrolase_subunit_1]	1	1	1	1	1	1	1	1
PF02696.9|UPF0061[Uncharacterized_ACR,_YdiU/UPF0061_family]	1	1	1	1	1	1	1	1
PF02724.9|CDC45[CDC45-like_protein]	1	1	1	1	1	1	1	1
PF02727.11|Cu_amine_oxidN2[Copper_amine_oxidase,_N2_domain]	1	1	1	1	1	1	1	1
PF02728.11|Cu_amine_oxidN3[Copper_amine_oxidase,_N3_domain]	1	1	1	1	1	1	1	1
PF02731.10|SKIP_SNW[SKIP/SNW_domain]	1	1	1	1	1	1	1	1
PF02733.12|Dak1[Dak1_domain]	1	1	1	1	1	1	1	1
PF02734.12|Dak2[DAK2_domain]	1	1	1	1	1	1	1	1
PF02737.13|3HCDH_N[3-hydroxyacyl-CoA_dehydrogenase,_NAD_binding_domain]	1	1	1	1	1	1	1	1
PF02749.11|QRPTase_N[Quinolinate_phosphoribosyl_transferase,_N-terminal_domain]	1	1	1	1	1	1	1	1
PF02771.11|Acyl-CoA_dh_N[Acyl-CoA_dehydrogenase,_N-terminal_domain]	1	1	1	1	1	1	1	1
PF02772.11|S-AdoMet_synt_M[S-adenosylmethionine_synthetase,_central_domain]	1	1	1	1	1	1	1	1
PF02773.11|S-AdoMet_synt_C[S-adenosylmethionine_synthetase,_C-terminal_domain]	1	1	1	1	1	1	1	1
PF02781.11|G6PD_C[Glucose-6-phosphate_dehydrogenase,_C-terminal_domain]	1	1	1	1	1	1	1	1
PF02784.11|Orn_Arg_deC_N[Pyridoxal-dependent_decarboxylase,_pyridoxal_binding_domain]	1	1	1	1	1	1	1	1
PF02791.12|DDT[DDT_domain]	1	1	1	1	1	1	1	1
PF02799.10|NMT_C[Myristoyl-CoA:protein_N-myristoyltransferase,_C-terminal_domain]	1	1	1	1	1	1	1	1
PF02805.11|Ada_Zn_binding[Metal_binding_domain_of_Ada]	1	1	1	1	1	1	1	1
PF02806.13|Alpha-amylase_C[Alpha_amylase,_C-terminal_all-beta_domain]	1	1	1	1	1	1	1	1
PF02811.14|PHP[PHP_domain]	1	1	1	1	1	1	1	1
PF02812.13|ELFV_dehydrog_N[Glu/Leu/Phe/Val_dehydrogenase,_dimerisation_domain]	1	1	1	1	1	1	1	1
PF02823.11|ATP-synt_DE_N[ATP_synthase,_Delta/Epsilon_chain,_beta-sandwich_domain]	1	1	1	1	1	1	1	1
PF02833.9|DHHA2[DHHA2_domain]	1	1	1	1	1	1	1	1
PF02840.10|Prp18[Prp18_domain]	1	1	1	1	1	1	1	1
PF02843.11|GARS_C[Phosphoribosylglycinamide_synthetase,_C_domain]	1	1	1	1	1	1	1	1
PF02844.10|GARS_N[Phosphoribosylglycinamide_synthetase,_N_domain]	1	1	1	1	1	1	1	1
PF02861.15|Clp_N[Clp_amino_terminal_domain]	1	1	1	1	1	1	1	1
PF02862.12|DDHD[DDHD_domain]	1	1	1	1	1	1	1	1
PF02885.12|Glycos_trans_3N[Glycosyl_transferase_family,_helical_bundle_domain]	1	1	1	1	1	1	1	1
PF02887.11|PK_C[Pyruvate_kinase,_alpha/beta_domain]	1	1	1	1	1	1	1	1
PF02894.12|GFO_IDH_MocA_C[Oxidoreductase_family,_C-terminal_alpha/beta_domain]	1	1	1	1	1	1	1	1
PF02900.13|LigB[Catalytic_LigB_subunit_of_aromatic_ring-opening_dioxygenase]	1	1	1	1	1	1	1	1
PF02906.9|Fe_hyd_lg_C[Iron_only_hydrogenase_large_subunit,_C-terminal_domain]	1	1	1	1	1	1	1	1
PF02910.15|Succ_DH_flav_C[Fumarate_reductase_flavoprotein_C-term]	1	1	1	1	1	1	1	1
PF02919.10|Topoisom_I_N[Eukaryotic_DNA_topoisomerase_I,_DNA_binding_fragment]	1	1	1	1	1	1	1	1
PF02921.9|UCR_TM[Ubiquinol_cytochrome_reductase_transmembrane_region]	1	1	1	1	1	1	1	1
PF02922.13|CBM_48[Carbohydrate-binding_module_48_(Isoamylase_N-terminal_domain)]	1	1	1	1	1	1	1	1
PF02926.12|THUMP[THUMP_domain]	1	1	1	1	1	1	1	1
PF02933.12|CDC48_2[Cell_division_protein_48_(CDC48),_domain_2]	1	1	1	1	1	1	1	1
PF02934.10|GatB_N[GatB/GatE_catalytic_domain]	1	1	1	1	1	1	1	1
PF02940.10|mRNA_triPase[mRNA_capping_enzyme,_beta_chain]	1	1	1	1	1	1	1	1
PF02958.15|EcKinase[Ecdysteroid_kinase]	1	1	1	1	1	1	1	1
PF02978.14|SRP_SPB[Signal_peptide_binding_domain]	1	1	1	1	1	1	1	1
PF02991.11|Atg8[Autophagy_protein_Atg8_ubiquitin_like]	1	1	1	1	1	1	1	1
PF03006.15|HlyIII[Haemolysin-III_related]	1	1	1	1	1	1	1	1
PF03028.10|Dynein_heavy[Dynein_heavy_chain_and_region_D6_of_dynein_motor]	1	1	1	1	1	1	1	1
PF03033.15|Glyco_transf_28[Glycosyltransferase_family_28_N-terminal_domain]	1	1	1	1	1	1	1	1
PF03054.11|tRNA_Me_trans[tRNA_methyl_transferase]	1	1	1	1	1	1	1	1
PF03074.11|GCS[Glutamate-cysteine_ligase]	1	1	1	1	1	1	1	1
PF03079.9|ARD[ARD/ARD'_family]	1	1	1	1	1	1	1	1
PF03081.10|Exo70[Exo70_exocyst_complex_subunit]	1	1	1	1	1	1	1	1
PF03108.10|DBD_Tnp_Mut[MuDR_family_transposase]	1	1	1	1	1	1	1	1
PF03126.13|Plus-3[Plus-3_domain]	1	1	1	1	1	1	1	1
PF03130.11|HEAT_PBS[PBS_lyase_HEAT-like_repeat]	1	1	1	1	1	1	1	1
PF03133.10|TTL[Tubulin-tyrosine_ligase_family]	1	1	1	1	1	1	1	1
PF03147.9|FDX-ACB[Ferredoxin-fold_anticodon_binding_domain]	1	1	1	1	1	1	1	1
PF03153.8|TFIIA[Transcription_factor_IIA,_alpha/beta_subunit]	1	1	1	1	1	1	1	1
PF03164.9|Mon1[Trafficking_protein_Mon1]	1	1	1	1	1	1	1	1
PF03179.10|V-ATPase_G[Vacuolar_(H+)-ATPase_G_subunit]	1	1	1	1	1	1	1	1
PF03184.14|DDE_1[DDE_superfamily_endonuclease]	1	1	1	1	1	1	1	1
PF03194.10|LUC7[LUC7_N_terminus]	1	1	1	1	1	1	1	1
PF03199.10|GSH_synthase[Eukaryotic_glutathione_synthase]	1	1	1	1	1	1	1	1
PF03208.14|PRA1[PRA1_family_protein]	1	1	1	1	1	1	1	1
PF03223.10|V-ATPase_C[V-ATPase_subunit_C]	1	1	1	1	1	1	1	1
PF03224.9|V-ATPase_H_N[V-ATPase_subunit_H]	1	1	1	1	1	1	1	1
PF03226.9|Yippee-Mis18[Yippee_zinc-binding/DNA-binding_/Mis18,_centromere_assembly]	1	1	1	1	1	1	1	1
PF03232.8|COQ7[Ubiquinone_biosynthesis_protein_COQ7]	1	1	1	1	1	1	1	1
PF03234.9|CDC37_N[Cdc37_N_terminal_kinase_binding]	1	1	1	1	1	1	1	1
PF03256.11|APC10[Anaphase-promoting_complex,_subunit_10_(APC10)]	1	1	1	1	1	1	1	1
PF03271.12|EB1[EB1-like_C-terminal_motif]	1	1	1	1	1	1	1	1
PF03291.11|Pox_MCEL[mRNA_capping_enzyme]	1	1	1	1	1	1	1	1
PF03297.10|Ribosomal_S25[S25_ribosomal_protein]	1	1	1	1	1	1	1	1
PF03311.9|Cornichon[Cornichon_protein]	1	1	1	1	1	1	1	1
PF03330.13|DPBB_1[Rare_lipoprotein_A_(RlpA)-like_double-psi_beta-barrel]	1	1	1	1	1	1	1	1
PF03332.8|PMM[Eukaryotic_phosphomannomutase]	1	1	1	1	1	1	1	1
PF03343.8|SART-1[SART-1_family]	1	1	1	1	1	1	1	1
PF03345.9|DDOST_48kD[Oligosaccharyltransferase_48_kDa_subunit_beta]	1	1	1	1	1	1	1	1
PF03348.10|Serinc[Serine_incorporator_(Serinc)]	1	1	1	1	1	1	1	1
PF03367.8|zf-ZPR1[ZPR1_zinc-finger_domain]	1	1	1	1	1	1	1	1
PF03371.10|PRP38[PRP38_family]	1	1	1	1	1	1	1	1
PF03378.10|CAS_CSE1[CAS/CSE_protein,_C-terminus]	1	1	1	1	1	1	1	1
PF03398.9|Ist1[Regulator_of_Vps4_activity_in_the_MVB_pathway]	1	1	1	1	1	1	1	1
PF03416.14|Peptidase_C54[Peptidase_family_C54]	1	1	1	1	1	1	1	1
PF03435.13|Saccharop_dh[Saccharopine_dehydrogenase]	1	1	1	1	1	1	1	1
PF03439.8|Spt5-NGN[Early_transcription_elongation_factor_of_RNA_pol_II,_NGN_section]	1	1	1	1	1	1	1	1
PF03441.9|FAD_binding_7[FAD_binding_domain_of_DNA_photolyase]	1	1	1	1	1	1	1	1
PF03447.11|NAD_binding_3[Homoserine_dehydrogenase,_NAD_binding_domain]	1	1	1	1	1	1	1	1
PF03460.12|NIR_SIR_ferr[Nitrite/Sulfite_reductase_ferredoxin-like_half_domain]	1	1	1	1	1	1	1	1
PF03467.10|Smg4_UPF3[Smg-4/UPF3_family]	1	1	1	1	1	1	1	1
PF03477.11|ATP-cone[ATP_cone_domain]	1	1	1	1	1	1	1	1
PF03481.8|SUA5[Putative_GTP-binding_controlling_metal-binding]	1	1	1	1	1	1	1	1
PF03483.12|B3_4[B3/4_domain]	1	1	1	1	1	1	1	1
PF03484.10|B5[tRNA_synthetase_B5_domain]	1	1	1	1	1	1	1	1
PF03501.10|S10_plectin[Plectin/S10_domain]	1	1	1	1	1	1	1	1
PF03531.9|SSrecog[Structure-specific_recognition_protein_(SSRP1)]	1	1	1	1	1	1	1	1
PF03540.8|TFIID_30kDa[Transcription_initiation_factor_TFIID_23-30kDa_subunit]	1	1	1	1	1	1	1	1
PF03542.11|Tuberin[Tuberin]	1	1	1	1	1	1	1	1
PF03556.10|Cullin_binding[Cullin_binding]	1	1	1	1	1	1	1	1
PF03561.10|Allantoicase[Allantoicase_repeat]	1	1	1	1	1	1	1	1
PF03568.12|Peptidase_C50[Peptidase_family_C50]	1	1	1	1	1	1	1	1
PF03571.10|Peptidase_M49[Peptidase_family_M49]	1	1	1	1	1	1	1	1
PF03587.9|EMG1[EMG1/NEP1_methyltransferase]	1	1	1	1	1	1	1	1
PF03595.12|SLAC1[Voltage-dependent_anion_channel]	1	1	1	1	1	1	1	1
PF03619.11|Solute_trans_a[Organic_solute_transporter_Ostalpha]	1	1	1	1	1	1	1	1
PF03630.9|Fumble[Fumble]	1	1	1	1	1	1	1	1
PF03632.10|Glyco_hydro_65m[Glycosyl_hydrolase_family_65_central_catalytic_domain]	1	1	1	1	1	1	1	1
PF03635.12|Vps35[Vacuolar_protein_sorting-associated_protein_35]	1	1	1	1	1	1	1	1
PF03636.10|Glyco_hydro_65N[Glycosyl_hydrolase_family_65,_N-terminal_domain]	1	1	1	1	1	1	1	1
PF03641.9|Lysine_decarbox[Possible_lysine_decarboxylase]	1	1	1	1	1	1	1	1
PF03643.10|Vps26[Vacuolar_protein_sorting-associated_protein_26]	1	1	1	1	1	1	1	1
PF03647.8|Tmemb_14[Transmembrane_proteins_14C]	1	1	1	1	1	1	1	1
PF03661.8|UPF0121[Uncharacterised_protein_family_(UPF0121)]	1	1	1	1	1	1	1	1
PF03666.8|NPR3[Nitrogen_Permease_regulator_of_amino_acid_transport_activity_3]	1	1	1	1	1	1	1	1
PF03676.9|UPF0183[Uncharacterised_protein_family_(UPF0183)]	1	1	1	1	1	1	1	1
PF03690.8|UPF0160[Uncharacterised_protein_family_(UPF0160)]	1	1	1	1	1	1	1	1
PF03694.8|Erg28[Erg28_like_protein]	1	1	1	1	1	1	1	1
PF03715.8|Noc2[Noc2p_family]	1	1	1	1	1	1	1	1
PF03733.8|DUF307[Domain_of_unknown_function_(DUF307)]	1	1	1	1	1	1	1	1
PF03737.10|Methyltransf_6[Demethylmenaquinone_methyltransferase]	1	1	1	1	1	1	1	1
PF03800.9|Nuf2[Nuf2_family]	1	1	1	1	1	1	1	1
PF03801.8|Ndc80_HEC[HEC/Ndc80p_family]	1	1	1	1	1	1	1	1
PF03803.10|Scramblase[Scramblase]	1	1	1	1	1	1	1	1
PF03813.9|Nrap[Nrap_protein]	1	1	1	1	1	1	1	1
PF03820.12|Mtc[Tricarboxylate_carrier]	1	1	1	1	1	1	1	1
PF03828.14|PAP_assoc[Cid1_family_poly_A_polymerase]	1	1	1	1	1	1	1	1
PF03834.9|Rad10[Binding_domain_of_DNA_repair_protein_Ercc1_(rad10/Swi10)]	1	1	1	1	1	1	1	1
PF03836.10|RasGAP_C[RasGAP_C-terminus]	1	1	1	1	1	1	1	1
PF03839.11|Sec62[Translocation_protein_Sec62]	1	1	1	1	1	1	1	1
PF03847.8|TFIID_20kDa[Transcription_initiation_factor_TFIID_subunit_A]	1	1	1	1	1	1	1	1
PF03849.9|Tfb2[Transcription_factor_Tfb2]	1	1	1	1	1	1	1	1
PF03850.9|Tfb4[Transcription_factor_Tfb4]	1	1	1	1	1	1	1	1
PF03870.10|RNA_pol_Rpb8[RNA_polymerase_Rpb8]	1	1	1	1	1	1	1	1
PF03871.9|RNA_pol_Rpb5_N[RNA_polymerase_Rpb5,_N-terminal_domain]	1	1	1	1	1	1	1	1
PF03878.10|YIF1[YIF1]	1	1	1	1	1	1	1	1
PF03879.9|Cgr1[Cgr1_family]	1	1	1	1	1	1	1	1
PF03900.10|Porphobil_deamC[Porphobilinogen_deaminase,_C-terminal_domain]	1	1	1	1	1	1	1	1
PF03907.8|Spo7[Spo7-like_protein]	1	1	1	1	1	1	1	1
PF03915.8|AIP3[Actin_interacting_protein_3]	1	1	1	1	1	1	1	1
PF03917.12|GSH_synth_ATP[Eukaryotic_glutathione_synthase,_ATP_binding_domain]	1	1	1	1	1	1	1	1
PF03919.10|mRNA_cap_C[mRNA_capping_enzyme,_C-terminal_domain]	1	1	1	1	1	1	1	1
PF03928.9|DUF336[Domain_of_unknown_function_(DUF336)]	1	1	1	1	1	1	1	1
PF03937.11|Sdh5[Flavinator_of_succinate_dehydrogenase]	1	1	1	1	1	1	1	1
PF03939.8|Ribosomal_L23eN[Ribosomal_protein_L23,_N-terminal_domain]	1	1	1	1	1	1	1	1
PF03941.10|INCENP_ARK-bind[Inner_centromere_protein,_ARK_binding_region]	1	1	1	1	1	1	1	1
PF03949.10|Malic_M[Malic_enzyme,_NAD_binding_domain]	1	1	1	1	1	1	1	1
PF03951.14|Gln-synt_N[Glutamine_synthetase,_beta-Grasp_domain]	1	1	1	1	1	1	1	1
PF03952.11|Enolase_N[Enolase,_N-terminal_domain]	1	1	1	1	1	1	1	1
PF03980.9|Nnf1[Nnf1]	1	1	1	1	1	1	1	1
PF03981.7|Ubiq_cyt_C_chap[Ubiquinol-cytochrome_C_chaperone]	1	1	1	1	1	1	1	1
PF03982.8|DAGAT[Diacylglycerol_acyltransferase]	1	1	1	1	1	1	1	1
PF03983.7|SHD1[SLA1_homology_domain_1,_SHD1]	1	1	1	1	1	1	1	1
PF03985.8|Paf1[Paf1]	1	1	1	1	1	1	1	1
PF03986.8|Autophagy_N[Autophagocytosis_associated_protein_(Atg3),_N-terminal_domain]	1	1	1	1	1	1	1	1
PF03987.10|Autophagy_act_C[Autophagocytosis_associated_protein,_active-site_domain]	1	1	1	1	1	1	1	1
PF03997.7|VPS28[VPS28_protein]	1	1	1	1	1	1	1	1
PF03998.8|Utp11[Utp11_protein]	1	1	1	1	1	1	1	1
PF03999.7|MAP65_ASE1[Microtubule_associated_protein_(MAP65/ASE1_family)]	1	1	1	1	1	1	1	1
PF04001.8|Vhr1[Transcription_factor_Vhr1]	1	1	1	1	1	1	1	1
PF04004.8|Leo1[Leo1-like_protein]	1	1	1	1	1	1	1	1
PF04005.7|Hus1[Hus1-like_protein]	1	1	1	1	1	1	1	1
PF04006.7|Mpp10[Mpp10_protein]	1	1	1	1	1	1	1	1
PF04030.9|ALO[D-arabinono-1,4-lactone_oxidase]	1	1	1	1	1	1	1	1
PF04034.8|DUF367[Domain_of_unknown_function_(DUF367)]	1	1	1	1	1	1	1	1
PF04037.8|DUF382[Domain_of_unknown_function_(DUF382)]	1	1	1	1	1	1	1	1
PF04041.8|DUF377[Domain_of_unknown_function_(DUF377)]	1	1	1	1	1	1	1	1
PF04045.9|P34-Arc[Arp2/3_complex,_34_kD_subunit_p34-Arc]	1	1	1	1	1	1	1	1
PF04046.11|PSP[PSP]	1	1	1	1	1	1	1	1
PF04048.9|Sec8_exocyst[Sec8_exocyst_complex_component_specific_domain]	1	1	1	1	1	1	1	1
PF04049.8|APC8[Anaphase_promoting_complex_subunit_8_/_Cdc23]	1	1	1	1	1	1	1	1
PF04054.10|Not1[CCR4-Not_complex_component,_Not1]	1	1	1	1	1	1	1	1
PF04057.7|Rep-A_N[Replication_factor-A_protein_1,_N-terminal_domain]	1	1	1	1	1	1	1	1
PF04063.9|DUF383[Domain_of_unknown_function_(DUF383)]	1	1	1	1	1	1	1	1
PF04064.8|DUF384[Domain_of_unknown_function_(DUF384)]	1	1	1	1	1	1	1	1
PF04073.10|tRNA_edit[Aminoacyl-tRNA_editing_domain]	1	1	1	1	1	1	1	1
PF04078.8|Rcd1[Cell_differentiation_family,_Rcd1-like]	1	1	1	1	1	1	1	1
PF04084.9|ORC2[Origin_recognition_complex_subunit_2]	1	1	1	1	1	1	1	1
PF04088.8|Peroxin-13_N[Peroxin_13,_N-terminal_region]	1	1	1	1	1	1	1	1
PF04090.7|RNA_pol_I_TF[RNA_polymerase_I_specific_initiation_factor]	1	1	1	1	1	1	1	1
PF04091.7|Sec15[Exocyst_complex_subunit_Sec15-like]	1	1	1	1	1	1	1	1
PF04095.11|NAPRTase[Nicotinate_phosphoribosyltransferase_(NAPRTase)_family]	1	1	1	1	1	1	1	1
PF04097.9|Nic96[Nup93/Nic96]	1	1	1	1	1	1	1	1
PF04098.10|Rad52_Rad22[Rad52/22_family_double-strand_break_repair_protein]	1	1	1	1	1	1	1	1
PF04100.7|Vps53_N[Vps53-like,_N-terminal]	1	1	1	1	1	1	1	1
PF04101.11|Glyco_tran_28_C[Glycosyltransferase_family_28_C-terminal_domain]	1	1	1	1	1	1	1	1
PF04104.9|DNA_primase_lrg[Eukaryotic_and_archaeal_DNA_primase,_large_subunit]	1	1	1	1	1	1	1	1
PF04108.7|APG17[Autophagy_protein_Apg17]	1	1	1	1	1	1	1	1
PF04109.11|APG9[Autophagy_protein_Apg9]	1	1	1	1	1	1	1	1
PF04111.7|APG6[Autophagy_protein_Apg6]	1	1	1	1	1	1	1	1
PF04112.8|Mak10[Mak10_subunit,_NatC_N(alpha)-terminal_acetyltransferase]	1	1	1	1	1	1	1	1
PF04113.9|Gpi16[Gpi16_subunit,_GPI_transamidase_component]	1	1	1	1	1	1	1	1
PF04114.9|Gaa1[Gaa1-like,_GPI_transamidase_component]	1	1	1	1	1	1	1	1
PF04115.7|Ureidogly_hydro[Ureidoglycolate_hydrolase]	1	1	1	1	1	1	1	1
PF04118.9|Dopey_N[Dopey,_N-terminal]	1	1	1	1	1	1	1	1
PF04121.8|Nup84_Nup100[Nuclear_pore_protein_84_/_107]	1	1	1	1	1	1	1	1
PF04124.7|Dor1[Dor1-like_family]	1	1	1	1	1	1	1	1
PF04127.10|DFP[DNA_/_pantothenate_metabolism_flavoprotein]	1	1	1	1	1	1	1	1
PF04129.7|Vps52[Vps52_/_Sac2_family]	1	1	1	1	1	1	1	1
PF04136.10|Sec34[Sec34-like_family]	1	1	1	1	1	1	1	1
PF04137.10|ERO1[Endoplasmic_Reticulum_Oxidoreductin_1_(ERO1)]	1	1	1	1	1	1	1	1
PF04140.9|ICMT[Isoprenylcysteine_carboxyl_methyltransferase_(ICMT)_family]	1	1	1	1	1	1	1	1
PF04142.10|Nuc_sug_transp[Nucleotide-sugar_transporter]	1	1	1	1	1	1	1	1
PF04146.10|YTH[YT521-B-like_domain]	1	1	1	1	1	1	1	1
PF04147.7|Nop14[Nop14-like_family]	1	1	1	1	1	1	1	1
PF04148.8|Erv26[Transmembrane_adaptor_Erv26]	1	1	1	1	1	1	1	1
PF04152.9|Mre11_DNA_bind[Mre11_DNA-binding_presumed_domain]	1	1	1	1	1	1	1	1
PF04158.9|Sof1[Sof1-like_domain]	1	1	1	1	1	1	1	1
PF04161.8|Arv1[Arv1-like_family]	1	1	1	1	1	1	1	1
PF04163.7|Tht1[Tht1-like_nuclear_fusion_protein]	1	1	1	1	1	1	1	1
PF04176.8|TIP41[TIP41-like_family]	1	1	1	1	1	1	1	1
PF04177.7|TAP42[TAP42-like_family]	1	1	1	1	1	1	1	1
PF04179.7|Init_tRNA_PT[Initiator_tRNA_phosphoribosyl_transferase]	1	1	1	1	1	1	1	1
PF04180.9|LTV[Low_temperature_viability_protein]	1	1	1	1	1	1	1	1
PF04182.7|B-block_TFIIIC[B-block_binding_subunit_of_TFIIIC]	1	1	1	1	1	1	1	1
PF04188.8|Mannosyl_trans2[Mannosyltransferase_(PIG-V))]	1	1	1	1	1	1	1	1
PF04189.8|Gcd10p[Gcd10p_family]	1	1	1	1	1	1	1	1
PF04190.8|DUF410[Protein_of_unknown_function_(DUF410)]	1	1	1	1	1	1	1	1
PF04192.7|Utp21[Utp21_specific_WD40_associated_putative_domain]	1	1	1	1	1	1	1	1
PF04194.8|PDCD2_C[Programmed_cell_death_protein_2,_C-terminal_putative_domain]	1	1	1	1	1	1	1	1
PF04212.13|MIT[MIT_(microtubule_interacting_and_transport)_domain]	1	1	1	1	1	1	1	1
PF04227.7|Indigoidine_A[Indigoidine_synthase_A_like_protein]	1	1	1	1	1	1	1	1
PF04252.8|RNA_Me_trans[Predicted_SAM-dependent_RNA_methyltransferase]	1	1	1	1	1	1	1	1
PF04258.8|Peptidase_A22B[Signal_peptide_peptidase]	1	1	1	1	1	1	1	1
PF04263.11|TPK_catalytic[Thiamin_pyrophosphokinase,_catalytic_domain]	1	1	1	1	1	1	1	1
PF04265.9|TPK_B1_binding[Thiamin_pyrophosphokinase,_vitamin_B1_binding_domain]	1	1	1	1	1	1	1	1
PF04280.10|Tim44[Tim44-like_domain]	1	1	1	1	1	1	1	1
PF04281.8|Tom22[Mitochondrial_import_receptor_subunit_Tom22]	1	1	1	1	1	1	1	1
PF04299.7|FMN_bind_2[Putative_FMN-binding_domain]	1	1	1	1	1	1	1	1
PF04366.7|DUF500[Family_of_unknown_function_(DUF500)]	1	1	1	1	1	1	1	1
PF04377.10|ATE_C[Arginine-tRNA-protein_transferase,_C_terminus]	1	1	1	1	1	1	1	1
PF04388.7|Hamartin[Hamartin_protein]	1	1	1	1	1	1	1	1
PF04420.9|CHD5[CHD5-like_protein]	1	1	1	1	1	1	1	1
PF04421.8|Mss4[Mss4_protein]	1	1	1	1	1	1	1	1
PF04424.8|DUF544[Protein_of_unknown_function_(DUF544)]	1	1	1	1	1	1	1	1
PF04428.9|Choline_kin_N[Choline_kinase_N_terminus]	1	1	1	1	1	1	1	1
PF04430.9|DUF498[Protein_of_unknown_function_(DUF498/DUF598)]	1	1	1	1	1	1	1	1
PF04437.8|RINT1_TIP1[RINT-1_/_TIP-1_family]	1	1	1	1	1	1	1	1
PF04442.9|CtaG_Cox11[Cytochrome_c_oxidase_assembly_protein_CtaG/Cox11]	1	1	1	1	1	1	1	1
PF04446.7|Thg1[tRNAHis_guanylyltransferase]	1	1	1	1	1	1	1	1
PF04494.10|TFIID_90kDa[WD40_associated_region_in_TFIID_subunit]	1	1	1	1	1	1	1	1
PF04495.9|GRASP55_65[GRASP55/65_PDZ-like_domain]	1	1	1	1	1	1	1	1
PF04502.8|DUF572[Family_of_unknown_function_(DUF572)]	1	1	1	1	1	1	1	1
PF04506.8|Rft-1[Rft_protein]	1	1	1	1	1	1	1	1
PF04515.7|Choline_transpo[Plasma-membrane_choline_transporter]	1	1	1	1	1	1	1	1
PF04547.7|Anoctamin[Calcium-activated_chloride_channel]	1	1	1	1	1	1	1	1
PF04557.10|tRNA_synt_1c_R2[Glutaminyl-tRNA_synthetase,_non-specific_RNA_binding_region_part_2]	1	1	1	1	1	1	1	1
PF04558.10|tRNA_synt_1c_R1[Glutaminyl-tRNA_synthetase,_non-specific_RNA_binding_region_part_1]	1	1	1	1	1	1	1	1
PF04568.7|IATP[Mitochondrial_ATPase_inhibitor,_IATP]	1	1	1	1	1	1	1	1
PF04571.9|Lipin_N[lipin,_N-terminal_conserved_region]	1	1	1	1	1	1	1	1
PF04573.7|SPC22[Signal_peptidase_subunit]	1	1	1	1	1	1	1	1
PF04574.8|DUF592[Protein_of_unknown_function_(DUF592)]	1	1	1	1	1	1	1	1
PF04597.9|Ribophorin_I[Ribophorin_I]	1	1	1	1	1	1	1	1
PF04603.7|Mog1[Ran-interacting_Mog1_protein]	1	1	1	1	1	1	1	1
PF04614.7|Pex19[Pex19_protein_family]	1	1	1	1	1	1	1	1
PF04615.8|Utp14[Utp14_protein]	1	1	1	1	1	1	1	1
PF04622.7|ERG2_Sigma1R[ERG2_and_Sigma1_receptor_like_protein]	1	1	1	1	1	1	1	1
PF04627.8|ATP-synt_Eps[Mitochondrial_ATP_synthase_epsilon_chain]	1	1	1	1	1	1	1	1
PF04652.11|DUF605[Vta1_like]	1	1	1	1	1	1	1	1
PF04658.8|TAFII55_N[TAFII55_protein_conserved_region]	1	1	1	1	1	1	1	1
PF04667.12|Endosulfine[cAMP-regulated_phosphoprotein/endosulfine_conserved_region]	1	1	1	1	1	1	1	1
PF04669.8|Polysacc_synt_4[Polysaccharide_biosynthesis]	1	1	1	1	1	1	1	1
PF04683.8|Proteasom_Rpn13[Proteasome_complex_subunit_Rpn13_ubiquitin_receptor]	1	1	1	1	1	1	1	1
PF04695.8|Pex14_N[Peroxisomal_membrane_anchor_protein_(Pex14p)_conserved_region]	1	1	1	1	1	1	1	1
PF04699.9|P16-Arc[ARP2/3_complex_16_kDa_subunit_(p16-Arc)]	1	1	1	1	1	1	1	1
PF04716.9|ETC_C1_NDUFA5[ETC_complex_I_subunit_conserved_region]	1	1	1	1	1	1	1	1
PF04718.10|ATP-synt_G[Mitochondrial_ATP_synthase_g_subunit]	1	1	1	1	1	1	1	1
PF04719.9|TAFII28[hTAFII28-like_protein_conserved_region]	1	1	1	1	1	1	1	1
PF04722.8|Ssu72[Ssu72-like_protein]	1	1	1	1	1	1	1	1
PF04729.8|ASF1_hist_chap[ASF1_like_histone_chaperone]	1	1	1	1	1	1	1	1
PF04733.9|Coatomer_E[Coatomer_epsilon_subunit]	1	1	1	1	1	1	1	1
PF04752.7|ChaC[ChaC-like_protein]	1	1	1	1	1	1	1	1
PF04760.10|IF2_N[Translation_initiation_factor_IF-2,_N-terminal_region]	1	1	1	1	1	1	1	1
PF04762.7|IKI3[IKI3_family]	1	1	1	1	1	1	1	1
PF04791.11|LMBR1[LMBR1-like_membrane_protein]	1	1	1	1	1	1	1	1
PF04795.7|PAPA-1[PAPA-1-like_conserved_region]	1	1	1	1	1	1	1	1
PF04800.7|ETC_C1_NDUFA4[ETC_complex_I_subunit_conserved_region]	1	1	1	1	1	1	1	1
PF04801.8|Sin_N[Sin-like_protein_conserved_region]	1	1	1	1	1	1	1	1
PF04802.10|SMK-1[Component_of_IIS_longevity_pathway_SMK-1]	1	1	1	1	1	1	1	1
PF04818.8|CTD_bind[RNA_polymerase_II-binding_domain.]	1	1	1	1	1	1	1	1
PF04821.9|TIMELESS[Timeless_protein]	1	1	1	1	1	1	1	1
PF04824.11|Rad21_Rec8[Conserved_region_of_Rad21_/_Rec8_like_protein]	1	1	1	1	1	1	1	1
PF04826.8|Arm_2[Armadillo-like]	1	1	1	1	1	1	1	1
PF04840.7|Vps16_C[Vps16,_C-terminal_region]	1	1	1	1	1	1	1	1
PF04841.8|Vps16_N[Vps16,_N-terminal_region]	1	1	1	1	1	1	1	1
PF04857.15|CAF1[CAF1_family_ribonuclease]	1	1	1	1	1	1	1	1
PF04869.9|Uso1_p115_head[Uso1_/_p115_like_vesicle_tethering_protein,_head_region]	1	1	1	1	1	1	1	1
PF04874.9|Mak16[Mak16_protein_C-terminal_region]	1	1	1	1	1	1	1	1
PF04882.7|Peroxin-3[Peroxin-3]	1	1	1	1	1	1	1	1
PF04898.9|Glu_syn_central[Glutamate_synthase_central_domain]	1	1	1	1	1	1	1	1
PF04908.10|SH3BGR[SH3-binding,_glutamic_acid-rich_protein]	1	1	1	1	1	1	1	1
PF04910.9|Tcf25[Transcriptional_repressor_TCF25]	1	1	1	1	1	1	1	1
PF04912.9|Dynamitin[Dynamitin]	1	1	1	1	1	1	1	1
PF04922.7|DIE2_ALG10[DIE2/ALG10_family]	1	1	1	1	1	1	1	1
PF04925.10|SHQ1[SHQ1_protein]	1	1	1	1	1	1	1	1
PF04926.10|PAP_RNA-bind[Poly(A)_polymerase_predicted_RNA_binding_domain]	1	1	1	1	1	1	1	1
PF04928.12|PAP_central[Poly(A)_polymerase_central_domain]	1	1	1	1	1	1	1	1
PF04931.8|DNA_pol_phi[DNA_polymerase_phi]	1	1	1	1	1	1	1	1
PF04934.9|Med6[MED6_mediator_sub_complex_component]	1	1	1	1	1	1	1	1
PF04938.7|SIP1[Survival_motor_neuron_(SMN)_interacting_protein_1_(SIP1)]	1	1	1	1	1	1	1	1
PF04939.7|RRS1[Ribosome_biogenesis_regulatory_protein_(RRS1)]	1	1	1	1	1	1	1	1
PF04979.9|IPP-2[Protein_phosphatase_inhibitor_2_(IPP-2)]	1	1	1	1	1	1	1	1
PF04981.8|NMD3[NMD3_family]	1	1	1	1	1	1	1	1
PF04982.8|HPP[HPP_family]	1	1	1	1	1	1	1	1
PF04987.9|PigN[Phosphatidylinositolglycan_class_N_(PIG-N)]	1	1	1	1	1	1	1	1
PF04990.7|RNA_pol_Rpb1_7[RNA_polymerase_Rpb1,_domain_7]	1	1	1	1	1	1	1	1
PF04992.9|RNA_pol_Rpb1_6[RNA_polymerase_Rpb1,_domain_6]	1	1	1	1	1	1	1	1
PF05002.10|SGS[SGS_domain]	1	1	1	1	1	1	1	1
PF05004.8|IFRD[Interferon-related_developmental_regulator_(IFRD)]	1	1	1	1	1	1	1	1
PF05007.8|Mannosyl_trans[Mannosyltransferase_(PIG-M)]	1	1	1	1	1	1	1	1
PF05008.10|V-SNARE[Vesicle_transport_v-SNARE_protein_N-terminus]	1	1	1	1	1	1	1	1
PF05011.8|DBR1[Lariat_debranching_enzyme,_C-terminal_domain]	1	1	1	1	1	1	1	1
PF05019.8|Coq4[Coenzyme_Q_(ubiquinone)_biosynthesis_protein_Coq4]	1	1	1	1	1	1	1	1
PF05020.10|zf-NPL4[NPL4_family,_putative_zinc_binding_region]	1	1	1	1	1	1	1	1
PF05021.10|NPL4[NPL4_family]	1	1	1	1	1	1	1	1
PF05022.7|SRP40_C[SRP40,_C-terminal_domain]	1	1	1	1	1	1	1	1
PF05024.10|Gpi1[N-acetylglucosaminyl_transferase_component_(Gpi1)]	1	1	1	1	1	1	1	1
PF05026.8|DCP2[Dcp2,_box_A_domain]	1	1	1	1	1	1	1	1
PF05064.8|Nsp1_C[Nsp1-like_C-terminal_region]	1	1	1	1	1	1	1	1
PF05088.7|Bac_GDH[Bacterial_NAD-glutamate_dehydrogenase]	1	1	1	1	1	1	1	1
PF05093.8|CIAPIN1[Cytokine-induced_anti-apoptosis_inhibitor_1,_Fe-S_biogenesis]	1	1	1	1	1	1	1	1
PF05127.9|Helicase_RecD[Helicase]	1	1	1	1	1	1	1	1
PF05129.8|Elf1[Transcription_elongation_factor_Elf1_like]	1	1	1	1	1	1	1	1
PF05132.9|RNA_pol_Rpc4[RNA_polymerase_III_RPC4]	1	1	1	1	1	1	1	1
PF05141.7|DIT1_PvcA[Pyoverdine/dityrosine_biosynthesis_protein]	1	1	1	1	1	1	1	1
PF05148.10|Methyltransf_8[Hypothetical_methyltransferase]	1	1	1	1	1	1	1	1
PF05153.10|DUF706[Family_of_unknown_function_(DUF706)]	1	1	1	1	1	1	1	1
PF05158.7|RNA_pol_Rpc34[RNA_polymerase_Rpc34_subunit]	1	1	1	1	1	1	1	1
PF05172.8|Nup35_RRM[Nup53/35/40-type_RNA_recognition_motif]	1	1	1	1	1	1	1	1
PF05176.9|ATP-synt_10[ATP10_protein]	1	1	1	1	1	1	1	1
PF05178.7|Kri1[KRI1-like_family]	1	1	1	1	1	1	1	1
PF05179.9|CDC73[RNA_pol_II_accessory_factor,_Cdc73_family]	1	1	1	1	1	1	1	1
PF05180.7|zf-DNL[DNL_zinc_finger]	1	1	1	1	1	1	1	1
PF05181.7|XPA_C[XPA_protein_C-terminus]	1	1	1	1	1	1	1	1
PF05186.8|Dpy-30[Dpy-30_motif]	1	1	1	1	1	1	1	1
PF05187.8|ETF_QO[Electron_transfer_flavoprotein-ubiquinone_oxidoreductase]	1	1	1	1	1	1	1	1
PF05189.8|RTC_insert[RNA_3'-terminal_phosphate_cyclase_(RTC),_insert_domain]	1	1	1	1	1	1	1	1
PF05199.8|GMC_oxred_C[GMC_oxidoreductase]	1	1	1	1	1	1	1	1
PF05205.7|COMPASS-Shg1[COMPASS_(Complex_proteins_associated_with_Set1p)_component_shg1]	1	1	1	1	1	1	1	1
PF05206.9|TRM13[Methyltransferase_TRM13]	1	1	1	1	1	1	1	1
PF05208.8|ALG3[ALG3_protein]	1	1	1	1	1	1	1	1
PF05216.8|UNC-50[UNC-50_family]	1	1	1	1	1	1	1	1
PF05221.12|AdoHcyase[S-adenosyl-L-homocysteine_hydrolase]	1	1	1	1	1	1	1	1
PF05222.10|AlaDh_PNT_N[Alanine_dehydrogenase/PNT,_N-terminal_domain]	1	1	1	1	1	1	1	1
PF05234.6|UAF_Rrn10[UAF_complex_subunit_Rrn10]	1	1	1	1	1	1	1	1
PF05236.9|TAF4[Transcription_initiation_factor_TFIID_component_TAF4_family]	1	1	1	1	1	1	1	1
PF05237.8|MoeZ_MoeB[MoeZ/MoeB_domain]	1	1	1	1	1	1	1	1
PF05238.8|CENP-N[Kinetochore_protein_CHL4_like]	1	1	1	1	1	1	1	1
PF05253.7|zf-U11-48K[U11-48K-like_CHHC_zinc_finger]	1	1	1	1	1	1	1	1
PF05254.7|UPF0203[Uncharacterised_protein_family_(UPF0203)]	1	1	1	1	1	1	1	1
PF05255.6|UPF0220[Uncharacterised_protein_family_(UPF0220)]	1	1	1	1	1	1	1	1
PF05277.7|DUF726[Protein_of_unknown_function_(DUF726)]	1	1	1	1	1	1	1	1
PF05282.6|AAR2[AAR2_protein]	1	1	1	1	1	1	1	1
PF05285.7|SDA1[SDA1]	1	1	1	1	1	1	1	1
PF05327.6|RRN3[RNA_polymerase_I_specific_transcription_initiation_factor_RRN3]	1	1	1	1	1	1	1	1
PF05345.7|He_PIG[Putative_Ig_domain]	1	1	1	1	1	1	1	1
PF05346.6|DUF747[Eukaryotic_membrane_protein_family]	1	1	1	1	1	1	1	1
PF05348.6|UMP1[Proteasome_maturation_factor_UMP1]	1	1	1	1	1	1	1	1
PF05378.8|Hydant_A_N[Hydantoinase/oxoprolinase_N-terminal_region]	1	1	1	1	1	1	1	1
PF05388.6|Carbpep_Y_N[Carboxypeptidase_Y_pro-peptide]	1	1	1	1	1	1	1	1
PF05397.7|Med15_fungi[Mediator_complex_subunit_15]	1	1	1	1	1	1	1	1
PF05405.9|Mt_ATP-synt_B[Mitochondrial_ATP_synthase_B_chain_precursor_(ATP-synt_B)]	1	1	1	1	1	1	1	1
PF05460.8|ORC6[Origin_recognition_complex_subunit_6_(ORC6)]	1	1	1	1	1	1	1	1
PF05470.7|eIF-3c_N[Eukaryotic_translation_initiation_factor_3_subunit_8_N-terminus]	1	1	1	1	1	1	1	1
PF05486.7|SRP9-21[Signal_recognition_particle_9_kDa_protein_(SRP9)]	1	1	1	1	1	1	1	1
PF05508.6|Ran-binding[RanGTP-binding_protein]	1	1	1	1	1	1	1	1
PF05544.6|Pro_racemase[Proline_racemase]	1	1	1	1	1	1	1	1
PF05546.6|She9_MDM33[She9_/_Mdm33_family]	1	1	1	1	1	1	1	1
PF05557.8|MAD[Mitotic_checkpoint_protein]	1	1	1	1	1	1	1	1
PF05603.7|DUF775[Protein_of_unknown_function_(DUF775)]	1	1	1	1	1	1	1	1
PF05625.6|PAXNEB[PAXNEB_protein]	1	1	1	1	1	1	1	1
PF05645.8|RNA_pol_Rpc82[RNA_polymerase_III_subunit_RPC82]	1	1	1	1	1	1	1	1
PF05652.7|DcpS[Scavenger_mRNA_decapping_enzyme_(DcpS)_N-terminal]	1	1	1	1	1	1	1	1
PF05653.9|Mg_trans_NIPA[Magnesium_transporter_NIPA]	1	1	1	1	1	1	1	1
PF05669.7|Med31[SOH1]	1	1	1	1	1	1	1	1
PF05680.7|ATP-synt_E[ATP_synthase_E_chain]	1	1	1	1	1	1	1	1
PF05693.8|Glycogen_syn[Glycogen_synthase]	1	1	1	1	1	1	1	1
PF05700.6|BCAS2[Breast_carcinoma_amplified_sequence_2_(BCAS2)]	1	1	1	1	1	1	1	1
PF05712.8|MRG[MRG]	1	1	1	1	1	1	1	1
PF05719.6|GPP34[Golgi_phosphoprotein_3_(GPP34)]	1	1	1	1	1	1	1	1
PF05726.8|Pirin_C[Pirin_C-terminal_cupin_domain]	1	1	1	1	1	1	1	1
PF05742.7|NRDE[NRDE_protein]	1	1	1	1	1	1	1	1
PF05743.8|UEV[UEV_domain]	1	1	1	1	1	1	1	1
PF05746.10|DALR_1[DALR_anticodon_binding_domain]	1	1	1	1	1	1	1	1
PF05764.8|YL1[YL1_nuclear_protein]	1	1	1	1	1	1	1	1
PF05786.9|Cnd2[Condensin_complex_subunit_2]	1	1	1	1	1	1	1	1
PF05794.8|Tcp11[T-complex_protein_11]	1	1	1	1	1	1	1	1
PF05804.7|KAP[Kinesin-associated_protein_(KAP)]	1	1	1	1	1	1	1	1
PF05821.6|NDUF_B8[NADH-ubiquinone_oxidoreductase_ASHI_subunit_(CI-ASHI_or_NDUFB8)]	1	1	1	1	1	1	1	1
PF05833.6|FbpA[Fibronectin-binding_protein_A_N-terminus_(FbpA)]	1	1	1	1	1	1	1	1
PF05834.7|Lycopene_cycl[Lycopene_cyclase_protein]	1	1	1	1	1	1	1	1
PF05841.6|Apc15p[Apc15p_protein]	1	1	1	1	1	1	1	1
PF05856.7|ARPC4[ARP2/3_complex_20_kDa_subunit_(ARPC4)]	1	1	1	1	1	1	1	1
PF05859.7|Mis12[Mis12_protein]	1	1	1	1	1	1	1	1
PF05871.7|ESCRT-II[ESCRT-II_complex_subunit]	1	1	1	1	1	1	1	1
PF05873.7|Mt_ATP-synt_D[ATP_synthase_D_chain,_mitochondrial_(ATP5H)]	1	1	1	1	1	1	1	1
PF05875.7|Ceramidase[Ceramidase]	1	1	1	1	1	1	1	1
PF05879.7|RHD3[Root_hair_defective_3_GTP-binding_protein_(RHD3)]	1	1	1	1	1	1	1	1
PF05890.7|Ebp2[Eukaryotic_rRNA_processing_protein_EBP2]	1	1	1	1	1	1	1	1
PF05891.7|Methyltransf_PK[AdoMet_dependent_proline_di-methyltransferase]	1	1	1	1	1	1	1	1
PF05899.7|Cupin_3[Protein_of_unknown_function_(DUF861)]	1	1	1	1	1	1	1	1
PF05903.9|Peptidase_C97[PPPDE_putative_peptidase_domain]	1	1	1	1	1	1	1	1
PF05907.8|DUF866[Eukaryotic_protein_of_unknown_function_(DUF866)]	1	1	1	1	1	1	1	1
PF05920.6|Homeobox_KN[Homeobox_KN_domain]	1	1	1	1	1	1	1	1
PF05978.11|UNC-93[Ion_channel_regulatory_protein_UNC-93]	1	1	1	1	1	1	1	1
PF05983.6|Med7[MED7_protein]	1	1	1	1	1	1	1	1
PF05995.7|CDO_I[Cysteine_dioxygenase_type_I]	1	1	1	1	1	1	1	1
PF05997.7|Nop52[Nucleolar_protein,Nop52]	1	1	1	1	1	1	1	1
PF06012.7|DUF908[Domain_of_Unknown_Function_(DUF908)]	1	1	1	1	1	1	1	1
PF06017.8|Myosin_TH1[Myosin_tail]	1	1	1	1	1	1	1	1
PF06025.7|DUF913[Domain_of_Unknown_Function_(DUF913)]	1	1	1	1	1	1	1	1
PF06026.9|Rib_5-P_isom_A[Ribose_5-phosphate_isomerase_A_(phosphoriboisomerase_A)]	1	1	1	1	1	1	1	1
PF06046.8|Sec6[Exocyst_complex_component_Sec6]	1	1	1	1	1	1	1	1
PF06052.7|3-HAO[3-hydroxyanthranilic_acid_dioxygenase]	1	1	1	1	1	1	1	1
PF06058.8|DCP1[Dcp1-like_decapping_family]	1	1	1	1	1	1	1	1
PF06087.7|Tyr-DNA_phospho[Tyrosyl-DNA_phosphodiesterase]	1	1	1	1	1	1	1	1
PF06093.8|Spt4[Spt4/RpoE2_zinc_finger]	1	1	1	1	1	1	1	1
PF06101.6|DUF946[Plant_protein_of_unknown_function_(DUF946)]	1	1	1	1	1	1	1	1
PF06102.7|DUF947[Domain_of_unknown_function_(DUF947)]	1	1	1	1	1	1	1	1
PF06144.8|DNA_pol3_delta[DNA_polymerase_III,_delta_subunit]	1	1	1	1	1	1	1	1
PF06148.6|COG2[COG_(conserved_oligomeric_Golgi)_complex_component,_COG2]	1	1	1	1	1	1	1	1
PF06172.6|Cupin_5[Cupin_superfamily_(DUF985)]	1	1	1	1	1	1	1	1
PF06218.6|NPR2[Nitrogen_permease_regulator_2]	1	1	1	1	1	1	1	1
PF06221.8|zf-C2HC5[Putative_zinc_finger_motif,_C2HC5-type]	1	1	1	1	1	1	1	1
PF06244.7|DUF1014[Protein_of_unknown_function_(DUF1014)]	1	1	1	1	1	1	1	1
PF06246.7|Isy1[Isy1-like_splicing_family]	1	1	1	1	1	1	1	1
PF06249.7|EutQ[Ethanolamine_utilisation_protein_EutQ]	1	1	1	1	1	1	1	1
PF06333.7|Med13_C[Mediator_complex_subunit_13_C-terminal]	1	1	1	1	1	1	1	1
PF06391.8|MAT1[CDK-activating_kinase_assembly_factor_MAT1]	1	1	1	1	1	1	1	1
PF06395.6|CDC24[CDC24_Calponin]	1	1	1	1	1	1	1	1
PF06417.7|DUF1077[Protein_of_unknown_function_(DUF1077)]	1	1	1	1	1	1	1	1
PF06418.9|CTP_synth_N[CTP_synthase_N-terminus]	1	1	1	1	1	1	1	1
PF06419.6|COG6[Conserved_oligomeric_complex_COG6]	1	1	1	1	1	1	1	1
PF06420.7|Mgm101p[Mitochondrial_genome_maintenance_MGM101]	1	1	1	1	1	1	1	1
PF06421.7|LepA_C[GTP-binding_protein_LepA_C-terminus]	1	1	1	1	1	1	1	1
PF06423.7|GWT1[GWT1]	1	1	1	1	1	1	1	1
PF06424.7|PRP1_N[PRP1_splicing_factor,_N-terminal]	1	1	1	1	1	1	1	1
PF06427.6|UDP-g_GGTase[UDP-glucose:Glycoprotein_Glucosyltransferase]	1	1	1	1	1	1	1	1
PF06428.6|Sec2p[GDP/GTP_exchange_factor_Sec2p]	1	1	1	1	1	1	1	1
PF06432.6|GPI2[Phosphatidylinositol_N-acetylglucosaminyltransferase]	1	1	1	1	1	1	1	1
PF06437.6|ISN1[IMP-specific_5'-nucleotidase]	1	1	1	1	1	1	1	1
PF06479.7|Ribonuc_2-5A[Ribonuclease_2-5A]	1	1	1	1	1	1	1	1
PF06522.6|B12D[NADH-ubiquinone_reductase_complex_1_MLRQ_subunit]	1	1	1	1	1	1	1	1
PF06544.7|DUF1115[Protein_of_unknown_function_(DUF1115)]	1	1	1	1	1	1	1	1
PF06602.9|Myotub-related[Myotubularin-like_phosphatase_domain]	1	1	1	1	1	1	1	1
PF06628.7|Catalase-rel[Catalase-related_immune-responsive]	1	1	1	1	1	1	1	1
PF06644.6|ATP11[ATP11_protein]	1	1	1	1	1	1	1	1
PF06650.7|DUF1162[Protein_of_unknown_function_(DUF1162)]	1	1	1	1	1	1	1	1
PF06703.6|SPC25[Microsomal_signal_peptidase_25_kDa_subunit_(SPC25)]	1	1	1	1	1	1	1	1
PF06732.6|Pescadillo_N[Pescadillo_N-terminus]	1	1	1	1	1	1	1	1
PF06733.10|DEAD_2[DEAD_2]	1	1	1	1	1	1	1	1
PF06738.7|DUF1212[Protein_of_unknown_function_(DUF1212)]	1	1	1	1	1	1	1	1
PF06741.8|LsmAD[LsmAD_domain]	1	1	1	1	1	1	1	1
PF06747.8|CHCH[CHCH_domain]	1	1	1	1	1	1	1	1
PF06772.6|LtrA[Bacterial_low_temperature_requirement_A_protein_(LtrA)]	1	1	1	1	1	1	1	1
PF06777.6|DUF1227[Protein_of_unknown_function_(DUF1227)]	1	1	1	1	1	1	1	1
PF06807.9|Clp1[Pre-mRNA_cleavage_complex_II_protein_Clp1]	1	1	1	1	1	1	1	1
PF06814.8|Lung_7-TM_R[Lung_seven_transmembrane_receptor]	1	1	1	1	1	1	1	1
PF06824.6|DUF1237[Protein_of_unknown_function_(DUF1237)]	1	1	1	1	1	1	1	1
PF06831.9|H2TH[Formamidopyrimidine-DNA_glycosylase_H2TH_domain]	1	1	1	1	1	1	1	1
PF06839.7|zf-GRF[GRF_zinc_finger]	1	1	1	1	1	1	1	1
PF06858.9|NOG1[Nucleolar_GTP-binding_protein_1_(NOG1)]	1	1	1	1	1	1	1	1
PF06862.7|DUF1253[Protein_of_unknown_function_(DUF1253)]	1	1	1	1	1	1	1	1
PF06870.7|RNA_pol_I_A49[A49-like_RNA_polymerase_I_associated_factor]	1	1	1	1	1	1	1	1
PF06881.6|Elongin_A[RNA_polymerase_II_transcription_factor_SIII_(Elongin)_subunit_A]	1	1	1	1	1	1	1	1
PF06883.7|RNA_pol_Rpa2_4[RNA_polymerase_I,_Rpa2_specific_domain]	1	1	1	1	1	1	1	1
PF06916.8|DUF1279[Protein_of_unknown_function_(DUF1279)]	1	1	1	1	1	1	1	1
PF06920.8|Ded_cyto[Dedicator_of_cytokinesis]	1	1	1	1	1	1	1	1
PF06957.6|COPI_C[Coatomer_(COPI)_alpha_subunit_C-terminus]	1	1	1	1	1	1	1	1
PF06968.8|BATS[Biotin_and_Thiamin_Synthesis_associated_domain]	1	1	1	1	1	1	1	1
PF06978.6|POP1[Ribonucleases_P/MRP_protein_subunit_POP1]	1	1	1	1	1	1	1	1
PF06984.8|MRP-L47[Mitochondrial_39-S_ribosomal_protein_L47_(MRP-L47)]	1	1	1	1	1	1	1	1
PF07034.6|ORC3_N[Origin_recognition_complex_(ORC)_subunit_3_N-terminus]	1	1	1	1	1	1	1	1
PF07039.6|DUF1325[SGF29_tudor-like_domain]	1	1	1	1	1	1	1	1
PF07047.7|OPA3[Optic_atrophy_3_protein_(OPA3)]	1	1	1	1	1	1	1	1
PF07064.8|RIC1[RIC1]	1	1	1	1	1	1	1	1
PF07065.9|D123[D123]	1	1	1	1	1	1	1	1
PF07173.7|DUF1399[Protein_of_unknown_function_(DUF1399)]	1	1	1	1	1	1	1	1
PF07189.6|SF3b10[Splicing_factor_3B_subunit_10_(SF3b10)]	1	1	1	1	1	1	1	1
PF07281.7|INSIG[Insulin-induced_protein_(INSIG)]	1	1	1	1	1	1	1	1
PF07304.6|SRA1[Steroid_receptor_RNA_activator_(SRA1)]	1	1	1	1	1	1	1	1
PF07350.7|DUF1479[Protein_of_unknown_function_(DUF1479)]	1	1	1	1	1	1	1	1
PF07491.6|PPI_Ypi1[Protein_phosphatase_inhibitor]	1	1	1	1	1	1	1	1
PF07492.6|Trehalase_Ca-bi[Neutral_trehalase_Ca2+_binding_domain]	1	1	1	1	1	1	1	1
PF07500.9|TFIIS_M[Transcription_factor_S-II_(TFIIS),_central_domain]	1	1	1	1	1	1	1	1
PF07522.9|DRMBL[DNA_repair_metallo-beta-lactamase]	1	1	1	1	1	1	1	1
PF07535.7|zf-DBF[DBF_zinc_finger]	1	1	1	1	1	1	1	1
PF07539.7|DRIM[Down-regulated_in_metastasis]	1	1	1	1	1	1	1	1
PF07540.6|NOC3p[Nucleolar_complex-associated_protein]	1	1	1	1	1	1	1	1
PF07542.6|ATP12[ATP12_chaperone_protein]	1	1	1	1	1	1	1	1
PF07544.8|Med9[RNA_polymerase_II_transcription_mediator_complex_subunit_9]	1	1	1	1	1	1	1	1
PF07571.8|DUF1546[Protein_of_unknown_function_(DUF1546)]	1	1	1	1	1	1	1	1
PF07572.7|BCNT[Bucentaur_or_craniofacial_development]	1	1	1	1	1	1	1	1
PF07574.8|SMC_Nse1[Nse1_non-SMC_component_of_SMC5-6_complex]	1	1	1	1	1	1	1	1
PF07575.8|Nucleopor_Nup85[Nup85_Nucleoporin]	1	1	1	1	1	1	1	1
PF07576.7|BRAP2[BRCA1-associated_protein_2]	1	1	1	1	1	1	1	1
PF07650.12|KH_2[KH_domain]	1	1	1	1	1	1	1	1
PF07662.8|Nucleos_tra2_C[Na+_dependent_nucleoside_transporter_C-terminus]	1	1	1	1	1	1	1	1
PF07718.7|Coatamer_beta_C[Coatomer_beta_C-terminal_region]	1	1	1	1	1	1	1	1
PF07738.8|Sad1_UNC[Sad1_/_UNC-like_C-terminal]	1	1	1	1	1	1	1	1
PF07741.8|BRF1[Brf1-like_TBP-binding_domain]	1	1	1	1	1	1	1	1
PF07743.8|HSCB_C[HSCB_C-terminal_oligomerisation_domain]	1	1	1	1	1	1	1	1
PF07744.8|SPOC[SPOC_domain]	1	1	1	1	1	1	1	1
PF07748.8|Glyco_hydro_38C[Glycosyl_hydrolases_family_38_C-terminal_domain]	1	1	1	1	1	1	1	1
PF07757.8|AdoMet_MTase[Predicted_AdoMet-dependent_methyltransferase]	1	1	1	1	1	1	1	1
PF07766.8|LETM1[LETM1-like_protein]	1	1	1	1	1	1	1	1
PF07767.6|Nop53[Nop53_(60S_ribosomal_biogenesis)]	1	1	1	1	1	1	1	1
PF07774.8|DUF1620[Protein_of_unknown_function_(DUF1620)]	1	1	1	1	1	1	1	1
PF07780.7|Spb1_C[Spb1_C-terminal_domain]	1	1	1	1	1	1	1	1
PF07792.7|Afi1[Docking_domain_of_Afi1_for_Arf3_in_vesicle_trafficking]	1	1	1	1	1	1	1	1
PF07817.8|GLE1[GLE1-like_protein]	1	1	1	1	1	1	1	1
PF07823.6|CPDase[Cyclic_phosphodiesterase-like_protein]	1	1	1	1	1	1	1	1
PF07855.7|DUF1649[Protein_of_unknown_function_(DUF1649)]	1	1	1	1	1	1	1	1
PF07890.7|Rrp15p[Rrp15p]	1	1	1	1	1	1	1	1
PF07896.7|DUF1674[Protein_of_unknown_function_(DUF1674)]	1	1	1	1	1	1	1	1
PF07904.8|Eaf7[Chromatin_modification-related_protein_EAF7]	1	1	1	1	1	1	1	1
PF07915.8|PRKCSH[Glucosidase_II_beta_subunit-like_protein]	1	1	1	1	1	1	1	1
PF07919.7|Gryzun[Gryzun,_putative_trafficking_through_Golgi]	1	1	1	1	1	1	1	1
PF07923.8|N1221[N1221-like_protein]	1	1	1	1	1	1	1	1
PF07928.7|Vps54[Vps54-like_protein]	1	1	1	1	1	1	1	1
PF07934.7|OGG_N[8-oxoguanine_DNA_glycosylase,_N-terminal_domain]	1	1	1	1	1	1	1	1
PF07946.9|DUF1682[Protein_of_unknown_function_(DUF1682)]	1	1	1	1	1	1	1	1
PF07950.6|DUF1691[Protein_of_unknown_function_(DUF1691)]	1	1	1	1	1	1	1	1
PF07956.6|DUF1690[Protein_of_Unknown_function_(DUF1690)]	1	1	1	1	1	1	1	1
PF07957.6|DUF3294[Protein_of_unknown_function_(DUF3294)]	1	1	1	1	1	1	1	1
PF07960.6|CBP4[CBP4]	1	1	1	1	1	1	1	1
PF07961.6|MBA1[MBA1-like_protein]	1	1	1	1	1	1	1	1
PF07962.7|Swi3[Replication_Fork_Protection_Component_Swi3]	1	1	1	1	1	1	1	1
PF07967.8|zf-C3HC[C3HC_zinc_finger-like]	1	1	1	1	1	1	1	1
PF07994.7|NAD_binding_5[Myo-inositol-1-phosphate_synthase]	1	1	1	1	1	1	1	1
PF08003.6|Methyltransf_9[Protein_of_unknown_function_(DUF1698)]	1	1	1	1	1	1	1	1
PF08007.7|Cupin_4[Cupin_superfamily_protein]	1	1	1	1	1	1	1	1
PF08028.6|Acyl-CoA_dh_2[Acyl-CoA_dehydrogenase,_C-terminal_domain]	1	1	1	1	1	1	1	1
PF08029.6|HisG_C[HisG,_C-terminal_domain]	1	1	1	1	1	1	1	1
PF08032.7|SpoU_sub_bind[RNA_2'-O_ribose_methyltransferase_substrate_binding]	1	1	1	1	1	1	1	1
PF08045.6|CDC14[Cell_division_control_protein_14,_SIN_component]	1	1	1	1	1	1	1	1
PF08058.6|NPCC[Nuclear_pore_complex_component]	1	1	1	1	1	1	1	1
PF08059.8|SEP[SEP_domain]	1	1	1	1	1	1	1	1
PF08064.8|UME[UME_(NUC010)_domain]	1	1	1	1	1	1	1	1
PF08066.7|PMC2NT[PMC2NT_(NUC016)_domain]	1	1	1	1	1	1	1	1
PF08068.7|DKCLD[DKCLD_(NUC011)_domain]	1	1	1	1	1	1	1	1
PF08069.7|Ribosomal_S13_N[Ribosomal_S13/S15_N-terminal_domain]	1	1	1	1	1	1	1	1
PF08079.7|Ribosomal_L30_N[Ribosomal_L30_N-terminal_domain]	1	1	1	1	1	1	1	1
PF08082.6|PRO8NT[PRO8NT_(NUC069),_PrP8_N-terminal_domain]	1	1	1	1	1	1	1	1
PF08083.6|PROCN[PROCN_(NUC071)_domain]	1	1	1	1	1	1	1	1
PF08084.6|PROCT[PROCT_(NUC072)_domain]	1	1	1	1	1	1	1	1
PF08101.6|DUF1708[Domain_of_unknown_function_(DUF1708)]	1	1	1	1	1	1	1	1
PF08123.8|DOT1[Histone_methylation_protein_DOT1]	1	1	1	1	1	1	1	1
PF08144.6|CPL[CPL_(NUC119)_domain]	1	1	1	1	1	1	1	1
PF08145.7|BOP1NT[BOP1NT_(NUC169)_domain]	1	1	1	1	1	1	1	1
PF08146.7|BP28CT[BP28CT_(NUC211)_domain]	1	1	1	1	1	1	1	1
PF08147.7|DBP10CT[DBP10CT_(NUC160)_domain]	1	1	1	1	1	1	1	1
PF08149.6|BING4CT[BING4CT_(NUC141)_domain]	1	1	1	1	1	1	1	1
PF08153.7|NGP1NT[NGP1NT_(NUC091)_domain]	1	1	1	1	1	1	1	1
PF08155.6|NOGCT[NOGCT_(NUC087)_domain]	1	1	1	1	1	1	1	1
PF08158.7|NUC130_3NT[NUC130/3NT_domain]	1	1	1	1	1	1	1	1
PF08161.7|NUC173[NUC173_domain]	1	1	1	1	1	1	1	1
PF08164.7|TRAUB[Apoptosis-antagonizing_transcription_factor,_C-terminal]	1	1	1	1	1	1	1	1
PF08167.7|RIX1[rRNA_processing/ribosome_biogenesis]	1	1	1	1	1	1	1	1
PF08170.7|POPLD[POPLD_(NUC188)_domain]	1	1	1	1	1	1	1	1
PF08171.6|Mad3_BUB1_II[Mad3/BUB1_homology_region_2]	1	1	1	1	1	1	1	1
PF08172.7|CASP_C[CASP_C_terminal]	1	1	1	1	1	1	1	1
PF08174.6|Anillin[Cell_division_protein_anillin]	1	1	1	1	1	1	1	1
PF08190.7|PIH1[pre-RNA_processing_PIH1/Nop17]	1	1	1	1	1	1	1	1
PF08192.6|Peptidase_S64[Peptidase_family_S64]	1	1	1	1	1	1	1	1
PF08193.6|INO80_Ies4[INO80_complex_subunit_Ies4]	1	1	1	1	1	1	1	1
PF08202.6|MIS13[Mis12-Mtw1_protein_family]	1	1	1	1	1	1	1	1
PF08203.6|RNA_polI_A14[Yeast_RNA_polymerase_I_subunit_RPA14]	1	1	1	1	1	1	1	1
PF08208.6|RNA_polI_A34[DNA-directed_RNA_polymerase_I_subunit_RPA34.5]	1	1	1	1	1	1	1	1
PF08213.6|DUF1713[Mitochondrial_domain_of_unknown_function_(DUF1713)]	1	1	1	1	1	1	1	1
PF08214.6|KAT11[Histone_acetylation_protein]	1	1	1	1	1	1	1	1
PF08217.6|DUF1712[Fungal_domain_of_unknown_function_(DUF1712)]	1	1	1	1	1	1	1	1
PF08219.6|TOM13[Outer_membrane_protein_TOM13]	1	1	1	1	1	1	1	1
PF08221.6|HTH_9[RNA_polymerase_III_subunit_RPC82_helix-turn-helix_domain]	1	1	1	1	1	1	1	1
PF08226.6|DUF1720[Domain_of_unknown_function_(DUF1720)]	1	1	1	1	1	1	1	1
PF08228.6|RNase_P_pop3[RNase_P_subunit_Pop3]	1	1	1	1	1	1	1	1
PF08229.6|SHR3_chaperone[ER_membrane_protein_SH3]	1	1	1	1	1	1	1	1
PF08232.7|Striatin[Striatin_family]	1	1	1	1	1	1	1	1
PF08234.7|Spindle_Spc25[Chromosome_segregation_protein_Spc25]	1	1	1	1	1	1	1	1
PF08235.8|LNS2[LNS2_(Lipin/Ned1/Smp2)]	1	1	1	1	1	1	1	1
PF08236.6|SRI[SRI_(Set2_Rpb1_interacting)_domain]	1	1	1	1	1	1	1	1
PF08243.6|SPT2[SPT2_chromatin_protein]	1	1	1	1	1	1	1	1
PF08244.7|Glyco_hydro_32C[Glycosyl_hydrolases_family_32_C_terminal]	1	1	1	1	1	1	1	1
PF08267.7|Meth_synt_1[Cobalamin-independent_synthase,_N-terminal_domain]	1	1	1	1	1	1	1	1
PF08284.6|RVP_2[Retroviral_aspartyl_protease]	1	1	1	1	1	1	1	1
PF08285.6|DPM3[Dolichol-phosphate_mannosyltransferase_subunit_3_(DPM3)]	1	1	1	1	1	1	1	1
PF08286.6|Spc24[Spc24_subunit_of_Ndc80]	1	1	1	1	1	1	1	1
PF08287.6|DASH_Spc19[Spc19]	1	1	1	1	1	1	1	1
PF08288.7|PIGA[PIGA_(GPI_anchor_biosynthesis)]	1	1	1	1	1	1	1	1
PF08292.7|RNA_pol_Rbc25[RNA_polymerase_III_subunit_Rpc25]	1	1	1	1	1	1	1	1
PF08294.6|TIM21[TIM21]	1	1	1	1	1	1	1	1
PF08295.7|Sin3_corepress[Sin3_family_co-repressor]	1	1	1	1	1	1	1	1
PF08297.6|U3_snoRNA_assoc[U3_snoRNA_associated]	1	1	1	1	1	1	1	1
PF08298.6|AAA_PrkA[PrkA_AAA_domain]	1	1	1	1	1	1	1	1
PF08311.7|Mad3_BUB1_I[Mad3/BUB1_homology_region_1]	1	1	1	1	1	1	1	1
PF08312.7|cwf21[cwf21_domain]	1	1	1	1	1	1	1	1
PF08314.6|Sec39[Secretory_pathway_protein_Sec39]	1	1	1	1	1	1	1	1
PF08316.6|Pal1[Pal1_cell_morphology_protein]	1	1	1	1	1	1	1	1
PF08317.6|Spc7[Spc7_kinetochore_protein]	1	1	1	1	1	1	1	1
PF08318.7|COG4[COG4_transport_protein]	1	1	1	1	1	1	1	1
PF08320.7|PIG-X[PIG-X_/_PBN1]	1	1	1	1	1	1	1	1
PF08321.7|PPP5[PPP5_TPR_repeat_region]	1	1	1	1	1	1	1	1
PF08323.6|Glyco_transf_5[Starch_synthase_catalytic_domain]	1	1	1	1	1	1	1	1
PF08324.6|PUL[PUL_domain]	1	1	1	1	1	1	1	1
PF08325.5|WLM[WLM_domain]	1	1	1	1	1	1	1	1
PF08326.7|ACC_central[Acetyl-CoA_carboxylase,_central_region]	1	1	1	1	1	1	1	1
PF08327.6|AHSA1[Activator_of_Hsp90_ATPase_homolog_1-like_protein]	1	1	1	1	1	1	1	1
PF08351.6|DUF1726[Domain_of_unknown_function_(DUF1726)]	1	1	1	1	1	1	1	1
PF08354.5|DUF1729[Domain_of_unknown_function_(DUF1729)]	1	1	1	1	1	1	1	1
PF08355.7|EF_assoc_1[EF_hand_associated]	1	1	1	1	1	1	1	1
PF08356.7|EF_assoc_2[EF_hand_associated]	1	1	1	1	1	1	1	1
PF08367.6|M16C_assoc[Peptidase_M16C_associated]	1	1	1	1	1	1	1	1
PF08375.6|Rpn3_C[Proteasome_regulatory_subunit_C-terminal]	1	1	1	1	1	1	1	1
PF08385.7|DHC_N1[Dynein_heavy_chain,_N-terminal_region_1]	1	1	1	1	1	1	1	1
PF08393.8|DHC_N2[Dynein_heavy_chain,_N-terminal_region_2]	1	1	1	1	1	1	1	1
PF08418.5|Pol_alpha_B_N[DNA_polymerase_alpha_subunit_B_N-terminal]	1	1	1	1	1	1	1	1
PF08426.5|ICE2[ICE2]	1	1	1	1	1	1	1	1
PF08427.5|DUF1741[Domain_of_unknown_function_(DUF1741)]	1	1	1	1	1	1	1	1
PF08429.6|PLU-1[PLU-1-like_protein]	1	1	1	1	1	1	1	1
PF08432.5|Vfa1[AAA-ATPase_Vps4-associated_protein_1]	1	1	1	1	1	1	1	1
PF08438.5|MMR_HSR1_C[GTPase_of_unknown_function_C-terminal]	1	1	1	1	1	1	1	1
PF08442.5|ATP-grasp_2[ATP-grasp_domain]	1	1	1	1	1	1	1	1
PF08450.7|SGL[SMP-30/Gluconolaconase/LRE-like_region]	1	1	1	1	1	1	1	1
PF08490.7|DUF1744[Domain_of_unknown_function_(DUF1744)]	1	1	1	1	1	1	1	1
PF08492.7|SRP72[SRP72_RNA-binding_domain]	1	1	1	1	1	1	1	1
PF08498.5|Sterol_MT_C[Sterol_methyltransferase_C-terminal]	1	1	1	1	1	1	1	1
PF08502.5|LeuA_dimer[LeuA_allosteric_(dimerisation)_domain]	1	1	1	1	1	1	1	1
PF08507.5|COPI_assoc[COPI_associated_protein]	1	1	1	1	1	1	1	1
PF08508.5|DUF1746[Fungal_domain_of_unknown_function_(DUF1746)]	1	1	1	1	1	1	1	1
PF08510.7|PIG-P[PIG-P]	1	1	1	1	1	1	1	1
PF08511.6|COQ9[COQ9]	1	1	1	1	1	1	1	1
PF08514.6|STAG[STAG_domain]	1	1	1	1	1	1	1	1
PF08518.6|GIT_SHD[Spa2_homology_domain_(SHD)_of_GIT]	1	1	1	1	1	1	1	1
PF08519.7|RFC1[Replication_factor_RFC1_C_terminal_domain]	1	1	1	1	1	1	1	1
PF08523.5|MBF1[Multiprotein_bridging_factor_1]	1	1	1	1	1	1	1	1
PF08524.6|rRNA_processing[rRNA_processing]	1	1	1	1	1	1	1	1
PF08538.5|DUF1749[Protein_of_unknown_function_(DUF1749)]	1	1	1	1	1	1	1	1
PF08540.5|HMG_CoA_synt_C[Hydroxymethylglutaryl-coenzyme_A_synthase_C_terminal]	1	1	1	1	1	1	1	1
[truncated: 2,263 more rows]

## Sheet: Data2. Kegg
Supplementary data 2. Gene conservation - KEGG-EC categories (pathways)
Kegg	Candida auris B11220	Candida auris B11221	Candida auris B11243	Candida auris B8441	Candida auris 6684	Candida duobushaeumulonii B09383	Candida haemulonii B11899	Candida pseudohaemulonii B12108
ko00563_Glycosylphosphatidylinositol(GPI)-anchor_biosynthesis	1	1	1	1	1	0	0	0
ko00361_Chlorocyclohexane_and_chlorobenzene_degradation	0	0	0	0	0	0	0	0
ko00363_Bisphenol_degradation	0	0	0	0	0	0	0	0
ko00511_Other_glycan_degradation	0	0	0	0	0	0	0	0
ko00523_Polyketide_sugar_unit_biosynthesis	0	0	0	0	0	0	0	0
ko00531_Glycosaminoglycan_degradation	0	0	0	0	0	0	0	0
ko00603_Glycosphingolipid_biosynthesis_-_globo_series	0	0	0	0	0	0	0	0
ko00604_Glycosphingolipid_biosynthesis_-_ganglio_series	0	0	0	0	0	0	0	0
ko01055_Biosynthesis_of_vancomycin_group_antibiotics	0	0	0	0	0	0	0	0
ko05217_Basal_cell_carcinoma	0	0	0	0	0	0	0	0
ko04512_ECM-receptor_interaction	0	0	0	0	0	0	0	1
ko00232_Caffeine_metabolism	1	1	1	1	1	1	0	1
ko03022_Basal_transcription_factors	1	1	1	1	1	0	1	1
ko00860_Porphyrin_and_chlorophyll_metabolism	3	3	3	3	3	1	1	1
ko05340_Primary_immunodeficiency	3	3	3	3	3	1	1	1
ko00072_Synthesis_and_degradation_of_ketone_bodies	1	3	1	1	1	1	1	1
ko00281_Geraniol_degradation	1	1	1	1	1	1	1	1
ko00364_Fluorobenzoate_degradation	1	1	1	1	1	1	1	1
ko00514_Other_types_of_O-glycan_biosynthesis	1	1	1	1	1	1	1	1
ko00591_Linoleic_acid_metabolism	1	1	1	1	1	1	1	1
ko00623_Toluene_degradation	1	1	1	1	1	1	1	1
ko00624_Polycyclic_aromatic_hydrocarbon_degradation	1	1	1	1	1	1	1	1
ko00642_Ethylbenzene_degradation	1	1	1	1	1	1	1	1
ko00740_Riboflavin_metabolism	1	1	1	1	1	1	1	1
ko00791_Atrazine_degradation	1	1	1	1	1	1	1	1
ko00930_Caprolactam_degradation	1	1	1	1	1	1	1	1
ko00965_Betalain_biosynthesis	1	1	1	1	1	1	1	1
ko01051_Biosynthesis_of_ansamycins	1	1	1	1	1	1	1	1
ko04013_MAPK_signaling_pathway_-_fly	1	1	1	1	1	1	1	1
ko04140_Regulation_of_autophagy	1	1	1	1	1	1	1	1
ko04320_Dorso-ventral_axis_formation	1	1	1	1	1	1	1	1
ko04744_Phototransduction	1	1	1	1	1	1	1	1
ko04964_Proximal_tubule_bicarbonate_reclamation	1	1	1	1	1	1	1	1
ko04978_Mineral_absorption	1	1	1	1	1	1	1	1
ko05218_Melanoma	1	1	1	1	1	1	1	1
ko05219_Bladder_cancer	1	1	1	1	1	1	1	1
ko05410_Hypertrophic_cardiomyopathy_(HCM)	1	1	1	1	1	1	1	1
ko05412_Arrhythmogenic_right_ventricular_cardiomyopathy_(ARVC)	1	1	1	1	1	1	1	1
ko04972_Pancreatic_secretion	2	2	2	2	2	1	2	1
ko05143_African_trypanosomiasis	2	2	2	2	2	1	2	1
ko05213_Endometrial_cancer	2	2	2	2	2	2	1	1
ko00600_Sphingolipid_metabolism	1	1	1	1	1	2	1	1
ko04974_Protein_digestion_and_absorption	1	1	1	1	1	1	1	2
ko04122_Sulfur_relay_system	2	2	2	2	2	2	2	1
ko04630_Jak-STAT_signaling_pathway	2	2	2	2	2	2	1	2
ko04742_Taste_transduction	2	2	2	2	2	2	2	1
ko00760_Nicotinate_and_nicotinamide_metabolism	3	3	3	3	3	2	2	2
ko00643_Styrene_degradation	1	3	3	3	3	1	3	2
ko00362_Benzoate_degradation	2	4	2	2	2	2	2	2
ko00627_Aminobenzoate_degradation	0	3	3	3	3	1	3	2
ko00900_Terpenoid_backbone_biosynthesis	2	4	2	2	2	2	2	2
ko00940_Phenylpropanoid_biosynthesis	2	2	2	3	2	3	2	1
ko00260_Glycine,_serine_and_threonine_metabolism	2	2	2	2	2	2	2	2
ko00660_C5-Branched_dibasic_acid_metabolism	2	2	2	2	2	2	2	2
ko00750_Vitamin_B6_metabolism	2	2	2	2	2	2	2	2
ko00790_Folate_biosynthesis	2	2	2	2	2	2	2	2
ko03070_Bacterial_secretion_system	2	2	2	2	2	2	2	2
ko04330_Notch_signaling_pathway	2	2	2	2	2	2	2	2
ko04620_Toll-like_receptor_signaling_pathway	2	2	2	2	2	2	2	2
ko04664_Fc_epsilon_RI_signaling_pathway	2	2	2	2	2	2	2	2
ko04711_Circadian_rhythm_-_fly	2	2	2	2	2	2	2	2
ko04975_Fat_digestion_and_absorption	2	2	2	2	2	2	2	2
ko05140_Leishmaniasis	2	2	2	2	2	2	2	2
ko05216_Thyroid_cancer	2	2	2	2	2	2	2	2
ko05220_Chronic_myeloid_leukemia	2	2	2	2	2	2	2	2
ko05221_Acute_myeloid_leukemia	2	2	2	2	2	2	2	2
ko04010_MAPK_signaling_pathway	3	3	3	3	3	2	3	2
ko04012_ErbB_signaling_pathway	3	3	3	3	3	2	3	2
ko04115_p53_signaling_pathway	3	3	3	3	3	3	3	1
ko04710_Circadian_rhythm_-_mammal	3	3	3	3	3	2	3	2
ko04960_Aldosterone-regulated_sodium_reabsorption	3	3	3	3	3	2	3	2
ko05223_Non-small_cell_lung_cancer	3	3	3	3	3	2	3	2
ko00401_Novobiocin_biosynthesis	3	3	3	3	2	2	3	2
ko00311_Penicillin_and_cephalosporin_biosynthesis	2	2	2	2	2	2	3	2
ko00472_D-Arginine_and_D-ornithine_metabolism	2	2	2	2	2	2	3	2
ko04614_Renin-angiotensin_system	2	2	2	2	2	2	3	2
ko00300_Lysine_biosynthesis	4	4	4	4	4	2	4	2
ko00053_Ascorbate_and_aldarate_metabolism	3	3	3	3	3	2	3	3
ko00524_Butirosin_and_neomycin_biosynthesis	3	3	3	3	3	3	2	3
ko00903_Limonene_and_pinene_degradation	3	3	3	3	3	2	3	3
ko03450_Non-homologous_end-joining	3	3	3	3	3	3	3	2
ko04740_Olfactory_transduction	3	3	3	3	3	3	3	2
ko05414_Dilated_cardiomyopathy	3	3	3	3	3	3	3	2
ko04626_Plant-pathogen_interaction	4	4	4	4	4	3	3	3
ko01040_Biosynthesis_of_unsaturated_fatty_acids	3	3	3	3	3	3	3	3
ko04380_Osteoclast_differentiation	3	3	3	3	3	3	3	3
ko04621_NOD-like_receptor_signaling_pathway	3	3	3	3	3	3	3	3
ko04662_B_cell_receptor_signaling_pathway	3	3	3	3	3	3	3	3
ko05215_Prostate_cancer	3	3	3	3	3	3	3	3
ko05322_Systemic_lupus_erythematosus	3	3	3	3	3	3	3	3
ko00290_Valine,_leucine_and_isoleucine_biosynthesis	4	4	4	4	4	4	3	3
ko00565_Ether_lipid_metabolism	4	4	4	4	4	3	4	3
ko00950_Isoquinoline_alkaloid_biosynthesis	4	4	4	4	4	3	4	3
ko00983_Drug_metabolism_-_other_enzymes	4	4	4	4	4	3	3	4
ko04670_Leukocyte_transendothelial_migration	4	4	4	4	4	3	4	3
ko04730_Long-term_depression	4	4	4	4	4	3	4	3
ko04745_Phototransduction_-_fly	4	4	4	4	4	3	4	3
ko05212_Pancreatic_cancer	4	4	4	4	4	3	4	3
ko05214_Glioma	4	4	4	4	4	3	4	3
ko00430_Taurine_and_hypotaurine_metabolism	3	4	3	3	3	3	4	3
ko04940_Type_I_diabetes_mellitus	3	4	3	3	3	3	4	3
ko05020_Prion_diseases	5	5	5	5	5	3	5	3
ko00040_Pentose_and_glucuronate_interconversions	4	4	4	4	4	3	4	4
ko00340_Histidine_metabolism	4	4	4	4	4	3	4	4
ko04340_Hedgehog_signaling_pathway	4	4	4	4	4	4	4	3
ko04973_Carbohydrate_digestion_and_absorption	4	4	4	4	4	4	3	4
ko04976_Bile_secretion	4	4	4	4	4	4	4	3
ko00521_Streptomycin_biosynthesis	5	5	5	5	5	4	4	4
ko04916_Melanogenesis	5	5	5	5	5	4	5	3
ko04962_Vasopressin-regulated_water_reabsorption	5	5	5	5	5	4	5	3
ko04970_Salivary_secretion	5	5	5	5	5	4	5	3
ko04971_Gastric_acid_secretion	5	5	5	5	5	4	5	3
ko00562_Inositol_phosphate_metabolism	4	4	4	4	4	4	4	4
ko03018_RNA_degradation	4	4	4	4	4	4	4	4
ko04712_Circadian_rhythm_-_plant	4	4	4	4	4	4	4	4
ko05222_Small_cell_lung_cancer	4	4	4	4	4	4	3	5
ko04622_RIG-I-like_receptor_signaling_pathway	3	4	4	3	3	4	4	4
ko04612_Antigen_processing_and_presentation	5	5	5	5	5	4	5	4
ko04650_Natural_killer_cell_mediated_cytotoxicity	5	5	5	5	5	4	5	4
ko05146_Amoebiasis	5	5	5	5	5	4	5	4
ko00561_Glycerolipid_metabolism	5	5	5	5	5	4	5	5
ko04062_Chemokine_signaling_pathway	5	5	5	5	5	5	5	4
ko00626_Naphthalene_degradation	6	6	6	6	6	5	5	5
ko00830_Retinol_metabolism	6	6	6	6	6	5	5	5
ko04150_mTOR_signaling_pathway	6	6	6	6	6	6	4	5
ko04270_Vascular_smooth_muscle_contraction	6	6	6	6	6	5	6	4
ko00250_Alanine,_aspartate_and_glutamate_metabolism	6	6	6	6	5	4	6	5
ko02020_Two-component_system	5	7	5	5	5	5	5	5
ko00020_Citrate_cycle_(TCA_cycle)	5	5	5	5	5	5	5	5
ko00190_Oxidative_phosphorylation	5	5	5	5	5	5	5	5
ko00590_Arachidonic_acid_metabolism	5	5	5	5	5	5	5	5
ko00592_alpha-Linolenic_acid_metabolism	5	5	5	5	5	5	5	5
ko04360_Axon_guidance	5	5	5	5	5	5	5	5
ko04920_Adipocytokine_signaling_pathway	5	5	5	5	5	5	5	5
ko05142_Chagas_disease_(American_trypanosomiasis)	5	5	5	5	5	5	5	5
ko05416_Viral_myocarditis	4	4	4	4	4	4	7	4
ko03440_Homologous_recombination	7	6	7	7	7	5	5	6
ko00460_Cyanoamino_acid_metabolism	5	7	7	7	7	5	7	4
ko00670_One_carbon_pool_by_folate	6	6	6	6	6	6	6	4
ko04210_Apoptosis	6	6	6	6	6	6	6	4
ko04350_TGF-beta_signaling_pathway	6	6	6	6	6	5	6	5
ko04510_Focal_adhesion	6	6	6	6	6	5	6	5
ko05145_Toxoplasmosis	6	6	6	6	6	5	6	5
ko05210_Colorectal_cancer	6	6	6	6	6	6	5	5
ko05211_Renal_cell_carcinoma	6	6	6	6	6	5	6	5
ko00960_Tropane,_piperidine_and_pyridine_alkaloid_biosynthesis	6	6	6	6	5	5	6	5
ko04020_Calcium_signaling_pathway	7	7	7	7	7	6	6	5
ko04930_Type_II_diabetes_mellitus	6	6	6	6	6	6	5	6
ko05014_Amyotrophic_lateral_sclerosis_(ALS)	6	6	6	6	6	5	6	6
ko04540_Gap_junction	7	7	7	8	7	6	7	5
ko00230_Purine_metabolism	7	7	7	7	7	5	7	6
ko04722_Neurotrophin_signaling_pathway	6	8	6	7	6	6	6	6
ko00770_Pantothenate_and_CoA_biosynthesis	6	6	6	6	6	6	6	6
ko04660_T_cell_receptor_signaling_pathway	6	6	6	6	6	6	6	6
ko00030_Pentose_phosphate_pathway	7	7	7	7	7	6	7	6
ko04011_MAPK_signaling_pathway_-_yeast	7	7	7	7	7	6	7	6
ko04370_VEGF_signaling_pathway	7	7	7	7	7	6	7	6
ko00400_Phenylalanine,_tyrosine_and_tryptophan_biosynthesis	7	7	7	7	6	6	7	6
ko04144_Endocytosis	8	8	8	8	8	6	7	7
ko00450_Selenocompound_metabolism	7	7	7	7	7	6	7	7
ko00920_Sulfur_metabolism	9	9	9	9	9	6	8	7
ko04666_Fc_gamma_R-mediated_phagocytosis	9	9	9	9	9	6	7	8
ko00380_Tryptophan_metabolism	6	11	9	9	9	5	9	7
ko00052_Galactose_metabolism	8	8	8	8	8	7	7	7
ko04720_Long-term_potentiation	8	8	8	8	8	7	8	6
ko04520_Adherens_junction	7	7	7	7	7	7	7	7
ko04142_Lysosome	8	8	8	8	8	8	7	7
ko04070_Phosphatidylinositol_signaling_system	10	10	10	10	10	7	8	8
ko00310_Lysine_degradation	9	11	9	9	9	7	8	8
ko00071_Fatty_acid_metabolism	9	9	9	9	9	7	8	8
ko00270_Cysteine_and_methionine_metabolism	9	9	9	9	9	7	9	7
ko00625_Chloroalkane_and_chloroalkene_degradation	9	9	9	9	9	7	8	8
ko04912_GnRH_signaling_pathway	8	8	8	9	8	8	8	7
ko05100_Bacterial_invasion_of_epithelial_cells	9	8	8	8	8	8	7	8
ko05130_Pathogenic_Escherichia_coli_infection	9	8	8	8	8	8	7	8
ko00051_Fructose_and_mannose_metabolism	8	8	8	8	8	8	7	8
ko05160_Hepatitis_C	8	8	8	7	8	8	7	8
ko00630_Glyoxylate_and_dicarboxylate_metabolism	9	11	9	9	9	9	9	7
ko00980_Metabolism_of_xenobiotics_by_cytochrome_P450	11	11	11	11	11	9	9	8
ko00564_Glycerophospholipid_metabolism	10	10	10	10	10	8	10	8
ko00910_Nitrogen_metabolism	8	8	8	8	8	9	9	8
ko05162_Measles	10	10	10	9	10	9	9	9
ko04110_Cell_cycle	10	10	10	10	10	9	10	9
ko00982_Drug_metabolism_-_cytochrome_P450	12	12	12	12	12	10	10	9
ko00280_Valine,_leucine_and_isoleucine_degradation	10	12	10	10	10	9	10	10
ko00720_Carbon_fixation_pathways_in_prokaryotes	10	12	10	10	10	10	10	9
ko03410_Base_excision_repair	10	11	10	11	10	10	9	10
ko03040_Spliceosome	15	17	15	15	15	10	10	10
ko04260_Cardiac_muscle_contraction	13	13	14	13	14	10	11	9
ko00970_Aminoacyl-tRNA_biosynthesis	12	12	12	12	12	11	11	8
ko03320_PPAR_signaling_pathway	10	10	10	10	10	10	10	10
ko04810_Regulation_of_actin_cytoskeleton	13	12	12	12	12	10	9	12
ko03013_RNA_transport	12	12	12	12	12	11	10	10
ko00360_Phenylalanine_metabolism	10	12	13	12	11	9	12	10
ko03015_mRNA_surveillance_pathway	11	13	11	11	11	11	10	10
ko04530_Tight_junction	11	11	11	11	11	10	11	10
ko00500_Starch_and_sucrose_metabolism	12	12	12	13	12	12	10	10
ko00520_Amino_sugar_and_nucleotide_sugar_metabolism	12	12	12	12	12	10	11	11
ko03030_DNA_replication	11	11	11	11	11	11	10	11
ko00480_Glutathione_metabolism	11	11	11	10	11	11	10	11
ko05131_Shigellosis	11	11	11	10	10	11	10	11
ko04966_Collecting_duct_acid_secretion	12	12	12	12	12	12	10	12
ko00650_Butanoate_metabolism	12	15	12	12	12	11	13	12
ko03430_Mismatch_repair	14	15	14	15	14	13	12	13
ko05323_Rheumatoid_arthritis	14	14	14	14	14	14	11	13
ko00410_beta-Alanine_metabolism	13	14	13	13	13	12	13	13
ko00710_Carbon_fixation_in_photosynthetic_organisms	13	13	13	13	13	13	13	13
ko04310_Wnt_signaling_pathway	15	15	15	15	15	13	15	12
ko00513_Various_types_of_N-glycan_biosynthesis	16	16	16	16	16	14	12	15
ko00640_Propanoate_metabolism	14	16	14	14	14	13	14	14
ko04914_Progesterone-mediated_oocyte_maturation	17	17	17	17	17	12	17	13
ko04623_Cytosolic_DNA-sensing_pathway	15	14	16	15	14	14	14	14
ko04146_Peroxisome	14	14	14	14	14	13	15	14
ko00330_Arginine_and_proline_metabolism	16	16	16	16	16	14	15	15
ko05120_Epithelial_cell_signaling_in_Helicobacter_pylori_infection	17	17	17	17	17	17	14	16
ko05200_Pathways_in_cancer	18	18	18	18	18	16	16	16
ko00350_Tyrosine_metabolism	19	19	20	19	18	16	18	17
ko04910_Insulin_signaling_pathway	18	18	18	18	18	18	16	17
ko04120_Ubiquitin_mediated_proteolysis	21	21	21	21	21	15	20	17
ko05110_Vibrio_cholerae_infection	21	22	22	22	22	20	17	16
ko00680_Methane_metabolism	21	21	21	21	21	20	20	18
ko00620_Pyruvate_metabolism	20	22	20	20	20	19	20	20
ko03420_Nucleotide_excision_repair	26	26	26	27	26	25	24	24
ko04145_Phagosome	27	28	28	28	28	27	23	24
ko04141_Protein_processing_in_endoplasmic_reticulum	31	32	32	31	32	26	27	24
ko04114_Oocyte_meiosis	30	32	30	30	30	25	29	25
ko03020_RNA_polymerase	28	27	29	28	27	27	27	27
ko04111_Cell_cycle_-_yeast	44	43	43	43	44	34	41	35
ko05012_Parkinson's_disease	52	52	53	51	54	42	45	43
ko04113_Meiosis_-_yeast	50	49	50	49	50	43	45	44
ko00240_Pyrimidine_metabolism	47	48	48	46	46	45	44	45
ko05010_Alzheimer's_disease	54	54	55	53	56	44	47	45
ko05016_Huntington's_disease	71	70	73	70	72	59	64	61

## Sheet: Data2. GPI-anchor predict
Supplementary data 2. Gene conservation - Species-specific GPI-anchor predicted proteins
Family #	Genes #	Genomes #	Candida auris B8441	Candida auris B11220	Candida auris B11221	Candida auris B11243	Candida haemulonii B11899	Candida pseudohaemulonii B12108	Candida duobushaeumulonii B09383	Candida albicans homolog
FAM14	68	20	B9J08_003486 B9J08_003621 B9J08_004010	CJI97_003560 CJI97_003694 CJI97_004013	CJI96_002902 CJI96_004456 CJI96_004876	CJJ07_001718 CJJ07_002032 CJJ07_002691	CXQ85_003530 CXQ85_003655 CXQ85_004713	C7M61_000117 C7M61_003774 C7M61_004764	CXQ87_001754 CXQ87_001881 CXQ87_004550	CR_09690C_A	PLB3
FAM27	46	15	B9J08_004112	CJI97_004175	CJI96_005396	CJJ07_003308	CXQ85_000890 CXQ85_004547	C7M61_001785 C7M61_002447 C7M61_003289	CXQ87_001667 CXQ87_002884 CXQ87_004268	C6_04130C_A	ALS4
FAM49	41	10	B9J08_000675 B9J08_001531 B9J08_004098 B9J08_004109 B9J08_004892	CJI97_001778 CJI97_004166 CJI97_004172 CJI97_004560	.	CJJ07_000849 CJJ07_003305 CJJ07_004124 CJJ07_005382	CXQ85_003757 CXQ85_003766 CXQ85_004563 CXQ85_004928 CXQ85_005263 CXQ85_005377	C7M61_001351 C7M61_001353 C7M61_003292 C7M61_004327 C7M61_005119 C7M61_005183	CXQ87_001664 CXQ87_003607 CXQ87_004674 CXQ87_005017 CXQ87_005018	CR_00610W_A	IFF4
FAM76	39	20	B9J08_000384 B9J08_000918	CJI97_000384 CJI97_000936	CJI96_002819 CJI96_003082	CJJ07_000645 CJJ07_002006	CXQ85_000352 CXQ85_001125	C7M61_001435 C7M61_002213	CXQ87_002156 CXQ87_003777	C1_00220W_A	PHR2
FAM192	28	20	B9J08_001958	CJI97_002143	CJI96_004048	CJJ07_004624	CXQ85_002463	C7M61_004031	CXQ87_002899	C3_03870C_A	SAP9
FAM333	22	20	B9J08_004410	CJI97_004473	CJI96_001969	CJJ07_003296	CXQ85_004236	C7M61_002925	CXQ87_001445	C4_02900C_A	CRH11
FAM526	21	17	B9J08_003912 B9J08_003913	CJI97_004108 CJI97_004109	CJI96_000824 CJI96_000825	CJJ07_000792	CXQ85_004623	C7M61_003840	CXQ87_004617	C3_03870C_A	SAP9
FAM928	20	20	B9J08_004947	CJI97_005031	CJI96_001196	CJJ07_003235	CXQ85_001595	C7M61_004829	CXQ87_003670	C1_00770C_A	ROT1
FAM1028	20	20	B9J08_004587	CJI97_004865	CJI96_004544	CJJ07_005346	CXQ85_004066	C7M61_005031	CXQ87_005311	C2_08610W_A	ERG9
FAM1186	20	20	B9J08_004004	CJI97_004019	CJI96_002908	CJJ07_002026	CXQ85_004708	C7M61_003832	CXQ87_004608	C3_00470W_A	.
FAM1333	20	17	B9J08_003550	CJI97_003623	CJI96_005160	CJJ07_003597	CXQ85_003586	C7M61_000057	CXQ87_001814	C2_08590W_A	YWP1
FAM2432	19	19	B9J08_005245	CJI97_005327	CJI96_002996	CJJ07_001893	CXQ85_000611	C7M61_001847	CXQ87_004001	C5_05390C_A	PGA4
FAM2554	19	19	B9J08_003903	CJI97_004118	CJI96_000834	CJJ07_000801	CXQ85_004614	C7M61_005173	CXQ87_004625	C2_00100C_A	PGA52
FAM2976	18	18	B9J08_005265	CJI97_005348	CJI96_000671	CJJ07_001914	CXQ85_000629	.	.	C7_00860W_A	SSR1
FAM3077	18	18	B9J08_004012	CJI97_004011	CJI96_002900	CJJ07_002034	CXQ85_004715	C7M61_003772	CXQ87_004548	C3_00390W_A	.
FAM3231	18	18	B9J08_001901	CJI97_002562	CJI96_000179	CJJ07_003210	.	C7M61_001009	CXQ87_000338	C3_01730C_A	UTR2
FAM3333	18	17	B9J08_000614	CJI97_000616	CJI96_004299	CJJ07_003041	CXQ85_001305	C7M61_004670	CXQ87_002344	C1_03190C_A	ECM33
FAM3474	17	17	B9J08_004382	CJI97_004445	CJI96_001139	CJJ07_003268	CXQ85_004339	C7M61_002821	CXQ87_001342	C5_02460C_A	ECM331
FAM3722	17	17	B9J08_001830	CJI97_002491	CJI96_000108	CJJ07_002324	CXQ85_001823	C7M61_001077	CXQ87_000269	C1_05960W_A	PGA45
FAM3773	17	17	B9J08_001292	CJI97_001314	CJI96_002178	CJJ07_002175	CXQ85_002939	C7M61_002582	CXQ87_003374	C2_00660C_A	SOD4
FAM4034	16	16	B9J08_002560	CJI97_002105	CJI96_003037	CJJ07_003061	CXQ85_004949	C7M61_004308	CXQ87_004983	.	.
FAM4260	14	14	B9J08_005545	CJI97_004535	CJI96_004822	CJJ07_000323	CXQ85_004177	C7M61_002985	CXQ87_001506	C4_00130W_A	RBT5
FAM4332	14	14	B9J08_000919	CJI97_000937	CJI96_003059	CJJ07_000644	CXQ85_001126	C7M61_002212	CXQ87_002157	C4_06260W_A	PGA43
FAM4367	13	13	B9J08_004530	CJI97_004922	CJI96_002650	CJJ07_005074	CXQ85_004100	C7M61_003823	CXQ87_004595	.	.
FAM4660	10	10	B9J08_004577	CJI97_004875	CJI96_004554	CJJ07_005292	CXQ85_004075	C7M61_005266	CXQ87_005319	C1_05760C_A	PGA26
FAM4674	10	10	B9J08_003571	CJI97_003644	CJI96_004440	CJJ07_004809	CXQ85_003607	C7M61_000035	CXQ87_001836	.	.
FAM4710	10	10	B9J08_001155	CJI97_001451	CJI96_004161	CJJ07_004272	CXQ85_002807	C7M61_002453	CXQ87_003243	C7_03290C_A	RBR3
FAM4806	9	8	B9J08_004476	CJI97_004975	CJI96_000429	CJJ07_004057	CXQ85_004557	C7M61_003391	CXQ87_001315 CXQ87_001569	.	.
FAM4816	9	9	B9J08_004110	CJI97_004173	CJI96_005468	CJJ07_003306	CXQ85_004549	C7M61_003290	CXQ87_001666	CR_03880W_A	IFF9
FAM4853	9	9	B9J08_001951	CJI97_002133	CJI96_005221	CJJ07_005050	CXQ85_002456	C7M61_004024	CXQ87_002892	C7_00090C_A	CSA1
FAM4871	9	9	B9J08_001242	CJI97_001364	CJI96_002585	CJJ07_003729	CXQ85_002891	C7M61_002534	CXQ87_003326	.	.
FAM4891	9	9	B9J08_000398	CJI97_000398	CJI96_002806	CJJ07_003933	CXQ85_000339	C7M61_004675	CXQ87_001968	C3_03870C_A	SAP9
FAM4982	8	6	B9J08_005561	CJI97_004552	.	CJJ07_000307	CXQ85_004161 CXQ85_004162 CXQ85_004163	.	CXQ87_001517	.	.
FAM5013	8	8	B9J08_004451	CJI97_004515	CJI96_004155	CJJ07_000343	CXQ85_004198	C7M61_002963	CXQ87_001485	CR_00610W_A	IFF4
FAM5021	8	6	B9J08_004100	CJI97_005649	.	CJJ07_000851	.	C7M61_004332 C7M61_005282	CXQ87_005009 CXQ87_005334	C5_00730W_A	HYR3
FAM5033	8	8	B9J08_003591	CJI97_003664	CJI96_002496	CJJ07_005101	CXQ85_003627	C7M61_000017	CXQ87_001855	.	.
FAM5067	8	8	B9J08_002574	CJI97_002118	CJI96_003051	CJJ07_003047	CXQ85_004936	C7M61_004320	CXQ87_004998	.	.
FAM5076	8	8	B9J08_002296	CJI97_001839	CJI96_000032	CJJ07_005286	CXQ85_005210	C7M61_003959	CXQ87_004744	.	.
FAM5093	8	8	B9J08_001551	CJI97_001759	CJI96_003520	CJJ07_000152	CXQ85_005354	C7M61_001331	CXQ87_000014	.	.
FAM5117	8	8	B9J08_000890	CJI97_000908	CJI96_005501	CJJ07_003881	CXQ85_001099	C7M61_002241	CXQ87_002127	.	.
FAM5144	8	8	B9J08_000116	CJI97_000121	CJI96_002684	CJJ07_000532	CXQ85_000129	C7M61_001676	CXQ87_002777	.	.
FAM5260	7	7	B9J08_005473	CJI97_005556	CJI96_002374	CJJ07_002988	.	C7M61_002059	CXQ87_004212	.	.
FAM5266	7	7	B9J08_004498	CJI97_004954	CJI96_000451	CJJ07_002852	.	C7M61_003783	CXQ87_004557	C6_03700W_A	ALS1
FAM5279	7	7	B9J08_003325	CJI97_003400	CJI96_002874	CJJ07_000881	CXQ85_003378	C7M61_000266	.	.	.
FAM5295	7	7	B9J08_002244	CJI97_001787	.	CJJ07_005521	CXQ85_005262	C7M61_004013	CXQ87_004690	.	.
FAM5296	7	7	B9J08_002159	CJI97_001622	CJI96_003129	CJJ07_003852	.	C7M61_004451	CXQ87_003080	.	.
FAM5302	7	7	B9J08_001409	CJI97_001195	CJI96_004728	CJJ07_001766	CXQ85_003055	.	.	.	.
FAM5501	6	6	B9J08_005559	CJI97_004550	.	CJJ07_000309	CXQ85_004160	.	CXQ87_001515	.	.
FAM5502	6	6	B9J08_005558	CJI97_004549	.	CJJ07_000310	CXQ85_004159	.	CXQ87_001514	.	.
FAM5503	6	6	B9J08_005557	CJI97_004548	.	CJJ07_000311	CXQ85_004158	.	CXQ87_001513	.	.
FAM5505	6	6	B9J08_005335	CJI97_005418	CJI96_004365	CJJ07_003413	CXQ85_000703	.	.	C3_03870C_A	SAP9
FAM5535	6	6	B9J08_001520	CJI97_001084	.	.	CXQ85_003162	C7M61_005189	CXQ87_003602	.	.
FAM5536	6	6	B9J08_001458	CJI97_001146	CJI96_001798	CJJ07_004265	CXQ85_003100	.	.	.	.
FAM5700	5	5	B9J08_004469	CJI97_004533	CJI96_004824	CJJ07_000325	.	.	.	C4_00120W_A	PGA7
FAM5714	5	5	B9J08_004276	CJI97_004339	CJI96_001706	CJJ07_002099	.	.	.	.	.
FAM5721	5	5	B9J08_004084	CJI97_004152	CJI96_005148	CJJ07_000835	.	.	.	.	.
FAM5726	5	5	B9J08_003911	CJI97_004110	CJI96_000826	CJJ07_000793	.	.	.	C3_03870C_A	SAP9
FAM5736	5	5	B9J08_003334	CJI97_003409	CJI96_002865	CJJ07_000872	.	.	.	.	.
FAM5737	5	5	B9J08_003333	CJI97_003408	CJI96_002866	CJJ07_000873	.	.	.	.	.
FAM5746	5	5	B9J08_002735	CJI97_002788	CJI96_004714	CJJ07_005538	.	.	.	.	.
FAM5754	5	5	B9J08_002493	CJI97_002037	CJI96_003243	CJJ07_002417	.	.	.	.	.
FAM5777	5	5	B9J08_001366	CJI97_001238	CJI96_004099	CJJ07_001808	.	.	.	.	.
FAM5787	5	5	B9J08_000892	CJI97_000910	CJI96_004656	CJJ07_003879	.	.	.	.	.
FAM5789	5	5	B9J08_000859	CJI97_000877	CJI96_003749	CJJ07_004447	.	.	.	.	.
FAM5796	5	5	B9J08_000438	CJI97_000438	CJI96_002099	CJJ07_002281	.	.	.	.	.
FAM5801	5	5	B9J08_000005	CJI97_000012	CJI96_000421	CJJ07_003166	.	.	.	.	.
FAM5802	5	5	B9J08_000004	CJI97_000011	CJI96_000422	CJJ07_003165	.	.	.	.	.
FAM5959	4	4	B9J08_005560	CJI97_004551	.	CJJ07_000308	.	.	.	.	.
FAM5975	4	4	B9J08_002582	CJI97_002126	.	CJJ07_004921	.	.	.	C3_06320W_A	ALS7
FAM5976	4	4	B9J08_002561	CJI97_002106	CJI96_003038	CJJ07_003060	.	.	.	.	.

## Sheet: Data2. Core filamentation genes
Supplementary data 2. Consevation of C. albicans core filamentation genes in C. auris and related species
	ECE1	ALS3	DCK1	HGT2	HWP1	IHD1	RBT1	orf19.2457
Candida auris B8441	.	B9J08_004112	B9J08_003624	B9J08_002251 B9J08_005568	.	.	.	.
Candida auris B11221	.	CJI97_004175	CJI97_003697	CJI97_001794 CJI97_005618	.	.	.	.
Candida auris B11220	.	CJI96_005396	CJI96_004881	CJI96_004474 CJI96_005015	.	.	.	.
Candida auris B11243	.	CJJ07_003308	CJJ07_002688	CJJ07_004989 CJJ07_005266	.	.	.	.
Candida haemulonii B11899	.	CXQ85_000890 CXQ85_004547	CXQ85_003658	CXQ85_005256	.	.	.	.
Candida pseudohaemulonii B12108	.	C7M61_001785 C7M61_002447 C7M61_003289	C7M61_004761	C7M61_002125 C7M61_004006	.	.	.	.
Candida duobushaeumulonii B09383	.	CXQ87_001667 CXQ87_002884 CXQ87_004268	CXQ87_001884	CXQ87_004697	.	.	.	.
