# Supplementary material for: Genomic insights into multidrug-resistance, mating and virulence in Candida auris and related emerging species
Source: Nat Commun. 2018 Dec 17;9:5346. doi: 10.1038/s41467-018-07779-6 (PMC6297351; doi:10.1038/s41467-018-07779-6)
Supplement: Supplementary file 5 — Supplementary Data 3 [file 41467_2018_7779_MOESM5_ESM.xlsx]

## Sheet: Data3. Ergosterol pathway
Supplementary data 3. Ergosterol biosynthesis pathway																							#GeneName	GeneId	TranscriptId	BioType	variants_impact_HIGH	variants_impact_LOW	variants_impact_MODERATE	variants_impact_MODIFIER
Gene ID	Gene name	Reaction EC	Enzymatic activity	Candida auris (B8441 - i)	Candida auris (B11221 - iii)	Candida auris (11220 - ii)	Candida auris (11243 - iv)	Candida haemulonii	Candida pseudohaemulonii	Candida duobushaeumulonii	Candida lusitaniae	Candida guilliermondii	Candida albicans	Candida krusei	S. cerevisiae								1%2C3-beta-glucan synthase component FKS1	B9J08_000964	B9J08_000964	protein_coding	0	26	3	236
ORF19.2775	IDI1	5.3.3.2	isopentenyl-diphosphate delta-isomerase	B9J08_001421	CJI97_001183		CJJ07_001754		C7M61_002710	CXQ87_003506	CLUG_04976	PGUG_02383	W5Q_03528	BER49_002977	YPL117C								1%2C4-alpha-glucan-branching enzyme	B9J08_002986	B9J08_002986	protein_coding	0	8	1	85
ORF19.6105	MVD	4.1.1.33	diphosphomevalonate decarboxylase	B9J08_001266	CJI97_001340	CJI96_002609	CJJ07_005402	CXQ85_002915	C7M61_002558	CXQ87_003350	CLUG_03454	PGUG_01095	W5Q_00005	BER49_003857	YNR043W								1-pyrroline-5-carboxylate dehydrogenase	B9J08_004317	B9J08_004317	protein_coding	0	24	2	451
ORF19.4606	ERG8	2.7.4.2	phosphomevalonate kinase	B9J08_001389	CJI97_001215	CJI96_002535	CJJ07_001785	CXQ85_003039	C7M61_002683	CXQ87_003478	CLUG_05024	PGUG_02404	W5Q_03487	BER49_002448	YMR220W								18S rRNA biogenesis protein RCL1	B9J08_001139	B9J08_001139	protein_coding	0	10	2	83
ORF19.4809	ERG12	2.7.1.36	mevalonate kinase	B9J08_005525	CJI97_005606	CJI96_003098	CJJ07_003508	CXQ85_000879	C7M61_002108		CLUG_05514	PGUG_04038	W5Q_00913	BER49_000476	YMR208W								2%2C3-diketo-5-methylthio-1-phosphopentane phosphatase	B9J08_004857	B9J08_004857	protein_coding	0	14	4	454
ORF19.1031	HMG1	1.1.1.34	hydroxymethylglutaryl-CoA reductase (NADPH)	B9J08_003224	CJI97_003299	CJI96_002274	CJJ07_001407	CXQ85_003281	C7M61_000357	CXQ87_001001	CLUG_04490	PGUG_04712	W5Q_00367	BER49_000929	YML075C								2-isopropylmalate synthase	B9J08_001277	B9J08_001277	protein_coding	0	24	0	393
ORF19.7312	ERG13	4.1.3.5	hydroxymethylglutaryl-CoA synthase	B9J08_004500	CJI97_004952	CJI96_000453	CJJ07_002854	CXQ85_004129	C7M61_003786	CXQ87_004560	CLUG_02734	PGUG_04243	W5Q_06367	BER49_001158	YML126C								2-oxoglutarate dehydrogenase%2C mitochondrial	B9J08_002363	B9J08_002363	protein_coding	0	16	4	188
ORF19.1591	ERG10	2.3.1.9	acetyl-CoA C-acetyltransferase	B9J08_003730	CJI97_003804	CJI96_000944	CJJ07_002606	CXQ85_004922	C7M61_004552	CXQ87_001990	CLUG_05112	PGUG_01489	W5Q_01863	BER49_003912	YPL028W								26S protease regulatory subunit 4	B9J08_001085	B9J08_001085	protein_coding	0	6	0	148
ORF19.2909	ERG26	No EC#	C-3 sterol dehydrogenase	B9J08_000920	CJI97_000938	CJI96_003060	CJJ07_000643	CXQ85_001127	C7M61_002211	CXQ87_002158	CLUG_01042	PGUG_05873	W5Q_03916	BER49_004162	YGL001C								26S protease regulatory subunit 6A	B9J08_003778	B9J08_003778	protein_coding	0	12	0	360
ORF19.3240	ERG27	No EC#	3-keto sterol reductase	B9J08_004245	CJI97_004310	CJI96_003886	CJJ07_005533	CXQ85_004397	C7M61_002771	CXQ87_001289	CLUG_05409	PGUG_05066	W5Q_05573	BER49_001716	YLR100W								26S protease regulatory subunit 7	B9J08_001338	B9J08_001338	protein_coding	0	23	0	480
ORF19.5379	ERG4	No EC#	C-24 sterol reductase	B9J08_002852	CJI97_002908	CJI96_001474	CJJ07_000972	CXQ85_002210	C7M61_000696	CXQ87_000655	CLUG_01341	PGUG_03519	W5Q_02565	BER49_002754	YGL012W								26S protease regulatory subunit 8	B9J08_005186	B9J08_005186	protein_coding	0	3	1	91
ORF19.5178	ERG5	No EC#	C-22 sterol desaturase	B9J08_002349	CJI97_001893	CJI96_005035	CJJ07_004846	CXQ85_005157	C7M61_003910	CXQ87_004792	CLUG_04246	PGUG_05085	W5Q_05316	BER49_004513	YMR015C								26S protease subunit RPT4	B9J08_001842	B9J08_001842	protein_coding	0	16	0	253
ORF19.767	ERG3	No EC#	C-5 sterol desaturase	B9J08_003737	CJI97_003811	CJI96_000951	CJJ07_003685	CXQ85_004914	C7M61_004543	CXQ87_001998	CLUG_05120	PGUG_01496	W5Q_00467	BER49_002007	YLR056W								26S proteasome regulatory subunit RPN11	B9J08_005445	B9J08_005445	protein_coding	0	8	1	156
ORF19.6026	ERG2	No EC#	C-8 sterol isomerase	B9J08_004943	CJI97_005027	CJI96_001192	CJJ07_003239	CXQ85_001599	C7M61_004826	CXQ87_003667	CLUG_00970	PGUG_04696	W5Q_00074	BER49_001939	YMR202W								3%2C4-dihydroxy-2-butanone 4-phosphate synthase	B9J08_003916	B9J08_003916	protein_coding	0	6	0	317
ORF19.1631	ERG6	2.1.1.41	sterol 24-C-methyltransferase	B9J08_005340	CJI97_005423	CJI96_004370	CJJ07_003408	CXQ85_000708	C7M61_001936	CXQ87_004088	CLUG_02673	PGUG_00661	W5Q_02721,W5Q_02705	BER49_002990	YML008C								3'(2')%2C5'-bisphosphate nucleotidase 2	B9J08_001798	B9J08_001798	protein_coding	0	7	1	171
ORF19.3732	ERG25	No EC#	C-4 sterol methyl oxidase	B9J08_000367	CJI97_000367	CJI96_001269	CJJ07_001989	CXQ85_000366	C7M61_001450	CXQ87_003761	CLUG_00377, CLUG_02113	PGUG_01908, PGUG_05253	W5Q_05684,W5Q_03456	BER49_000828	YGR060W								3-demethylubiquinone-9 3-O-methyltransferase	B9J08_005369	B9J08_005369	protein_coding	0	2	0	239
ORF19.1598	ERG24	1.3.1.70	delta14-sterol reductase	B9J08_003026	CJI97_003097	CJI96_003874	CJJ07_004496	CXQ85_002370	C7M61_000540	CXQ87_000814	CLUG_03122	PGUG_04548, PGUG_02536	W5Q_02361	BER49_003563	YNL280C								3-hydroxyanthranilate 3%2C4-dioxygenase	B9J08_005101	B9J08_005101	protein_coding	0	9	0	291
ORF19.922	ERG11	1.14.13.70	sterol 14-demethylase	B9J08_001448	CJI97_001156	CJI96_001787	CJJ07_004981	CXQ85_003088	C7M61_004938	CXQ87_003531	CLUG_04932	PGUG_03415	W5Q_04104	BER49_002190	YHR007C								3-isopropylmalate dehydratase	B9J08_004781	B9J08_004781	protein_coding	0	29	2	358
ORF19.3616	ERG9	2.5.1.21	farnesyl-diphosphate farnesyltransferase	B9J08_004587	CJI97_004865	CJI96_004544	CJJ07_005346	CXQ85_004066	C7M61_005031	CXQ87_005311	CLUG_00485	PGUG_05132	W5Q_02274	BER49_003345	YHR190W								3-isopropylmalate dehydrogenase	B9J08_000229	B9J08_000229	protein_coding	0	13	0	217
ORF19.1570	ERG7	5.4.99.7	lanosterol synthase	B9J08_005007	CJI97_005090	CJI96_004607	CJJ07_005369	CXQ85_001533	C7M61_003215	CXQ87_002578	CLUG_00911	PGUG_05319	W5Q_01690	BER49_003424	YHR072W								3-ketoacyl-CoA thiolase B%2C peroxisomal	B9J08_001484	B9J08_001484	protein_coding	0	9	0	368
ORF19.406	ERG1	1.14.99.7	squalene monooxygenase	B9J08_000261	CJI97_000262	CJI96_000748	CJJ07_001622	CXQ85_000262	C7M61_001549	CXQ87_002645	CLUG_01944	PGUG_04402	W5Q_00827	BER49_000786	YGR175C								4-aminobutyrate aminotransferase	B9J08_000863	B9J08_000863	protein_coding	1	19	4	294
ORF19.4491	ERG20	2.5.1.10	geranyltranstransferase	B9J08_003125	CJI97_003197	CJI96_004230	CJJ07_004716	CXQ85_003202	C7M61_000435	CXQ87_000921	CLUG_02611	PGUG_01467	W5Q_01890	BER49_002886	YJL167W								4-aminobutyrate aminotransferase	B9J08_003452	B9J08_003452	protein_coding	0	6	3	162
																							4-hydroxybenzoate polyprenyl transferase	B9J08_004122	B9J08_004122	protein_coding	0	4	8	245
																							4-hydroxyphenylpyruvate dioxygenase	B9J08_005516	B9J08_005516	protein_coding	1	16	10	201
																							40S ribosomal protein S0	B9J08_005324	B9J08_005324	protein_coding	0	22	2	360
																							40S ribosomal protein S1-A	B9J08_004956	B9J08_004956	protein_coding	0	2	0	225
																							40S ribosomal protein S10-A	B9J08_003107	B9J08_003107	protein_coding	0	2	0	152
																							40S ribosomal protein S11-A	B9J08_002921	B9J08_002921	protein_coding	0	3	0	189
																							40S ribosomal protein S13	B9J08_001870	B9J08_001870	protein_coding	0	3	0	72
																							40S ribosomal protein S14	B9J08_000605	B9J08_000605	protein_coding	0	6	1	213
																							40S ribosomal protein S15	B9J08_003755	B9J08_003755	protein_coding	0	2	0	233
																							40S ribosomal protein S16	B9J08_003248	B9J08_003248	protein_coding	0	3	1	134
																							40S ribosomal protein S17-B	B9J08_000254	B9J08_000254	protein_coding	0	3	0	155
																							40S ribosomal protein S18-B	B9J08_003273	B9J08_003273	protein_coding	0	1	0	153
																							40S ribosomal protein S19-A	B9J08_000091	B9J08_000091	protein_coding	0	2	0	148
																							40S ribosomal protein S2	B9J08_004990	B9J08_004990	protein_coding	0	7	0	319
																							40S ribosomal protein S20	B9J08_000107	B9J08_000107	protein_coding	0	4	0	138
																							40S ribosomal protein S21	B9J08_000998	B9J08_000998	protein_coding	0	2	0	182
																							40S ribosomal protein S22	B9J08_000604	B9J08_000604	protein_coding	0	6	1	218
																							40S ribosomal protein S22	B9J08_004672	B9J08_004672	protein_coding	0	4	0	219
																							40S ribosomal protein S23	B9J08_003677	B9J08_003677	protein_coding	0	0	0	217
																							40S ribosomal protein S24-A	B9J08_003089	B9J08_003089	protein_coding	0	2	0	75
																							40S ribosomal protein S25-B	B9J08_004699	B9J08_004699	protein_coding	0	4	1	97
																							40S ribosomal protein S26-B	B9J08_000142	B9J08_000142	protein_coding	0	1	1	175
																							40S ribosomal protein S27-B	B9J08_000461	B9J08_000461	protein_coding	0	0	0	363
																							40S ribosomal protein S27-B	B9J08_003695	B9J08_003695	protein_coding	0	8	0	239
																							40S ribosomal protein S28-A	B9J08_003288	B9J08_003288	protein_coding	0	0	0	188
																							40S ribosomal protein S3	B9J08_001974	B9J08_001974	protein_coding	0	7	3	275
																							40S ribosomal protein S4	B9J08_001686	B9J08_001686	protein_coding	0	4	0	148
																							40S ribosomal protein S4	B9J08_003582	B9J08_003582	protein_coding	0	3	0	163
																							40S ribosomal protein S5	B9J08_004067	B9J08_004067	protein_coding	0	1	0	369
																							40S ribosomal protein S6	B9J08_000771	B9J08_000771	protein_coding	0	5	0	314
																							40S ribosomal protein S7-A	B9J08_000185	B9J08_000185	protein_coding	0	2	0	280
																							40S ribosomal protein S8-B	B9J08_002961	B9J08_002961	protein_coding	0	6	1	249
																							40S ribosomal protein S9-A	B9J08_000203	B9J08_000203	protein_coding	0	7	2	158
																							5'/3'-nucleotidase SurE	B9J08_001613	B9J08_001613	protein_coding	0	2	1	165
																							5'/3'-nucleotidase SurE	B9J08_001614	B9J08_001614	protein_coding	1	3	2	175
																							5'/3'-nucleotidase SurE	B9J08_003541	B9J08_003541	protein_coding	1	22	16	296
																							5'/3'-nucleotidase SurE	B9J08_005238	B9J08_005238	protein_coding	0	7	0	72
																							5-aminolevulinate synthase%2C mitochondrial	B9J08_001887	B9J08_001887	protein_coding	0	4	3	109
																							5-formyltetrahydrofolate cyclo-ligase	B9J08_000496	B9J08_000496	protein_coding	0	3	4	223
																							5-methyltetrahydropteroyltriglutamate-homocysteine methyltransferase	B9J08_000382	B9J08_000382	protein_coding	0	20	5	199
																							50S ribosomal protein L3	B9J08_000697	B9J08_000697	protein_coding	0	16	2	191
																							5s_rRNA	B9J08_000265	B9J08_000265	rRNA	0	0	0	182
																							5s_rRNA	B9J08_001055	B9J08_001055	rRNA	0	0	0	346
																							5s_rRNA	B9J08_001060	B9J08_001060	rRNA	0	0	0	34
																							5s_rRNA	B9J08_001061	B9J08_001061	rRNA	0	0	0	58
																							5s_rRNA	B9J08_001947	B9J08_001947	rRNA	0	0	0	387
																							5s_rRNA	B9J08_004470	B9J08_004470	rRNA	0	0	0	253
																							5s_rRNA	B9J08_005566	B9J08_005566	rRNA	0	0	0	612
																							5s_rRNA	B9J08_005577	B9J08_005577	rRNA	0	0	0	516
																							6%2C7-dimethyl-8-ribityllumazine synthase	B9J08_004158	B9J08_004158	protein_coding	0	7	0	405
																							6-phosphofructokinase	B9J08_004309	B9J08_004309	protein_coding	0	26	2	248
																							6-phosphofructokinase	B9J08_004928	B9J08_004928	protein_coding	0	26	3	188
																							6-phosphogluconate dehydrogenase%2C decarboxylating	B9J08_002350	B9J08_002350	protein_coding	0	7	1	226
																							6-phosphogluconolactonase	B9J08_003809	B9J08_003809	protein_coding	0	4	1	220
																							6-phosphogluconolactonase	B9J08_005134	B9J08_005134	protein_coding	0	0	2	92
																							60S acidic ribosomal protein P0	B9J08_000711	B9J08_000711	protein_coding	2	8	3	213
																							60S acidic ribosomal protein P1-A	B9J08_003250	B9J08_003250	protein_coding	0	2	1	131
																							60S acidic ribosomal protein P1-B	B9J08_000209	B9J08_000209	protein_coding	0	1	1	193
																							60S acidic ribosomal protein P2-A	B9J08_004999	B9J08_004999	protein_coding	5	7	6	518
																							60S acidic ribosomal protein P2-B	B9J08_003756	B9J08_003756	protein_coding	0	0	0	195
																							60S ribosomal export protein NMD3	B9J08_005132	B9J08_005132	protein_coding	0	3	2	110
																							60S ribosomal protein L10	B9J08_002601	B9J08_002601	protein_coding	1	9	2	349
																							60S ribosomal protein L10a	B9J08_001922	B9J08_001922	protein_coding	4	7	2	209
																							60S ribosomal protein L11-A	B9J08_000064	B9J08_000064	protein_coding	0	12	0	206
																							60S ribosomal protein L12-A	B9J08_005336	B9J08_005336	protein_coding	0	2	0	263
																							60S ribosomal protein L13	B9J08_003249	B9J08_003249	protein_coding	0	3	2	131
																							60S ribosomal protein L15-A	B9J08_001851	B9J08_001851	protein_coding	0	2	0	145
																							60S ribosomal protein L16-B	B9J08_001278	B9J08_001278	protein_coding	0	2	2	383
																							60S ribosomal protein L17-B	B9J08_003127	B9J08_003127	protein_coding	0	1	0	148
																							60S ribosomal protein L18-A	B9J08_000090	B9J08_000090	protein_coding	0	3	0	143
																							60S ribosomal protein L19-B	B9J08_003953	B9J08_003953	protein_coding	4	4	5	290
																							60S ribosomal protein L2-A	B9J08_004431	B9J08_004431	protein_coding	0	6	0	231
																							60S ribosomal protein L2-A	B9J08_005150	B9J08_005150	protein_coding	0	5	0	338
																							60S ribosomal protein L20-A	B9J08_005230	B9J08_005230	protein_coding	0	5	0	93
																							60S ribosomal protein L23-B	B9J08_001081	B9J08_001081	protein_coding	0	0	0	157
																							60S ribosomal protein L24	B9J08_002718	B9J08_002718	protein_coding	0	1	0	77
																							60S ribosomal protein L25	B9J08_000554	B9J08_000554	protein_coding	0	2	0	202
																							60S ribosomal protein L27	B9J08_003919	B9J08_003919	protein_coding	0	0	0	343
																							60S ribosomal protein L28	B9J08_000346	B9J08_000346	protein_coding	0	1	1	271
																							60S ribosomal protein L29	B9J08_005152	B9J08_005152	protein_coding	0	1	1	348
																							60S ribosomal protein L3	B9J08_003023	B9J08_003023	protein_coding	5	26	23	130
																							60S ribosomal protein L30	B9J08_002719	B9J08_002719	protein_coding	0	1	0	77
																							60S ribosomal protein L31-A	B9J08_003634	B9J08_003634	protein_coding	0	1	0	228
																							60S ribosomal protein L32	B9J08_005382	B9J08_005382	protein_coding	0	2	1	181
																							60S ribosomal protein L33-A	B9J08_000878	B9J08_000878	protein_coding	0	2	0	363
																							60S ribosomal protein L34-B	B9J08_003393	B9J08_003393	protein_coding	0	1	0	192
																							60S ribosomal protein L36	B9J08_000727	B9J08_000727	protein_coding	1	2	0	203
																							60S ribosomal protein L37-B	B9J08_005253	B9J08_005253	protein_coding	0	0	0	184
																							60S ribosomal protein L4-A	B9J08_003313	B9J08_003313	protein_coding	0	5	0	234
																							60S ribosomal protein L43	B9J08_004391	B9J08_004391	protein_coding	0	2	1	366
																							60S ribosomal protein L44	B9J08_000823	B9J08_000823	protein_coding	0	4	0	347
																							60S ribosomal protein L5	B9J08_005099	B9J08_005099	protein_coding	0	12	0	306
																							60S ribosomal protein L6-B	B9J08_004958	B9J08_004958	protein_coding	0	6	0	252
																							60S ribosomal protein L7	B9J08_004574	B9J08_004574	protein_coding	0	8	0	325
																							60S ribosomal protein L8-B	B9J08_004434	B9J08_004434	protein_coding	0	0	1	285
																							60S ribosomal protein L8-B	B9J08_005153	B9J08_005153	protein_coding	0	5	3	340
																							60S ribosomal protein L9-B	B9J08_002367	B9J08_002367	protein_coding	0	4	0	141
																							ABC transporter ATP-binding protein ARB1	B9J08_004129	B9J08_004129	protein_coding	0	17	3	388
																							ADP%2CATP carrier protein	B9J08_000434	B9J08_000434	protein_coding	0	3	0	282
																							ADP-ribosylation factor 1	B9J08_002276	B9J08_002276	protein_coding	0	3	0	313
																							ADP-ribosylation factor-like protein 1	B9J08_001387	B9J08_001387	protein_coding	0	2	0	99
																							AMP deaminase	B9J08_004289	B9J08_004289	protein_coding	0	30	1	408
																							ATP phosphoribosyltransferase	B9J08_005247	B9J08_005247	protein_coding	0	10	0	144
																							ATP synthase F1%2C delta subunit	B9J08_004005	B9J08_004005	protein_coding	0	3	0	523
																							ATP synthase F1%2C epsilon subunit	B9J08_001250	B9J08_001250	protein_coding	0	2	1	198
																							ATP synthase F1%2C gamma subunit	B9J08_005349	B9J08_005349	protein_coding	0	2	1	195
																							ATP synthase subunit alpha%2C mitochondrial	B9J08_000020	B9J08_000020	protein_coding	0	20	3	344
																							ATP synthase subunit beta%2C mitochondrial	B9J08_003508	B9J08_003508	protein_coding	0	22	4	171
																							ATP-dependent RNA helicase DBP2	B9J08_004170	B9J08_004170	protein_coding	0	25	0	343
																							ATP-dependent RNA helicase DBP3	B9J08_001363	B9J08_001363	protein_coding	4	24	15	352
																							ATP-dependent RNA helicase DBP4	B9J08_002209	B9J08_002209	protein_coding	0	31	8	159
																							ATP-dependent RNA helicase DBP8	B9J08_005116	B9J08_005116	protein_coding	0	23	2	249
																							ATP-dependent RNA helicase DBP9	B9J08_005373	B9J08_005373	protein_coding	0	10	3	213
																							ATP-dependent RNA helicase DED1	B9J08_002124	B9J08_002124	protein_coding	0	32	3	176
																							ATP-dependent RNA helicase DHH1	B9J08_002289	B9J08_002289	protein_coding	0	16	6	305
																							ATP-dependent RNA helicase DOB1	B9J08_003795	B9J08_003795	protein_coding	0	39	3	212
																							ATP-dependent RNA helicase FAL1	B9J08_005085	B9J08_005085	protein_coding	0	33	1	137
																							ATP-dependent RNA helicase HAS1	B9J08_004322	B9J08_004322	protein_coding	0	20	5	326
																							ATP-dependent RNA helicase SUB2	B9J08_003512	B9J08_003512	protein_coding	8	5	5	162
																							ATP-dependent RNA helicase eIF4A	B9J08_000996	B9J08_000996	protein_coding	8	11	2	172
																							ATP-dependent protease La	B9J08_002618	B9J08_002618	protein_coding	0	56	8	312
																							ATP-dependent protease La	B9J08_005478	B9J08_005478	protein_coding	0	23	10	193
																							ATP-dependent rRNA helicase RRP3	B9J08_003688	B9J08_003688	protein_coding	0	24	3	136
																							ATPase GET3	B9J08_002329	B9J08_002329	protein_coding	0	6	2	254
																							CDK-activating kinase assembly factor MAT1	B9J08_002048	B9J08_002048	protein_coding	0	3	2	96
																							CDP-diacylglycerol-serine O-phosphatidyltransferase	B9J08_005295	B9J08_005295	protein_coding	0	9	1	307
																							CTP synthase	B9J08_004393	B9J08_004393	protein_coding	0	19	2	499
																							Cx9C domain-containing protein-containing protein 4%2C mitochondrial	B9J08_004483	B9J08_004483	protein_coding	0	0	1	161
																							Cys-Gly metallodipeptidase DUG1	B9J08_004357	B9J08_004357	protein_coding	0	17	0	332
																							D-3-phosphoglycerate dehydrogenase 1	B9J08_000320	B9J08_000320	protein_coding	0	12	0	258
																							D-arabinitol 2-dehydrogenase [ribulose-forming]	B9J08_000370	B9J08_000370	protein_coding	0	9	1	256
																							D-arabinono-1%2C4-lactone oxidase	B9J08_004501	B9J08_004501	protein_coding	0	13	2	168
																							D-lactate dehydrogenase [cytochrome] 2%2C mitochondrial	B9J08_002780	B9J08_002780	protein_coding	0	5	3	148
																							D-tyrosyl-tRNA(Tyr) deacylase	B9J08_004155	B9J08_004155	protein_coding	0	7	2	356
																							D-xylulose reductase	B9J08_002627	B9J08_002627	protein_coding	0	10	4	238
																							DEHA2A12496p	B9J08_000362	B9J08_000362	protein_coding	0	10	2	378
																							DNA 3'-phosphatase	B9J08_003653	B9J08_003653	protein_coding	0	13	3	211
																							DNA polymerase delta catalytic subunit	B9J08_001960	B9J08_001960	protein_coding	0	14	3	100
																							DNA polymerase epsilon catalytic subunit A	B9J08_001693	B9J08_001693	protein_coding	0	37	8	111
																							DNA repair helicase RAD25	B9J08_003013	B9J08_003013	protein_coding	0	9	5	100
																							DNA repair helicase RAD3	B9J08_001343	B9J08_001343	protein_coding	0	31	1	394
																							DNA repair protein	B9J08_004917	B9J08_004917	protein_coding	0	9	5	193
																							DNA repair protein (mre11)	B9J08_005411	B9J08_005411	protein_coding	0	8	8	198
																							DNA repair protein rad18	B9J08_005376	B9J08_005376	protein_coding	0	13	11	242
																							DNA repair protein rhp51	B9J08_001108	B9J08_001108	protein_coding	0	11	0	123
																							DNA-binding protein%2C 42 kDa	B9J08_004685	B9J08_004685	protein_coding	0	5	2	123
																							DNA-binding protein%2C 42 kDa	B9J08_005542	B9J08_005542	protein_coding	0	3	0	0
																							DNA-directed RNA polymerase	B9J08_001337	B9J08_001337	protein_coding	0	5	1	477
																							DNA-directed RNA polymerase I and III subunit RPAC1	B9J08_005010	B9J08_005010	protein_coding	0	9	0	112
																							DNA-directed RNA polymerase I subunit RPA2	B9J08_000192	B9J08_000192	protein_coding	0	17	1	220
																							DNA-directed RNA polymerase I%2C II%2C and III subunit RPABC1	B9J08_003940	B9J08_003940	protein_coding	0	7	0	321
																							DNA-directed RNA polymerase I%2C II%2C and III subunit RPABC5	B9J08_000215	B9J08_000215	protein_coding	0	0	0	156
																							DNA-directed RNA polymerase II subunit RPB1	B9J08_001256	B9J08_001256	protein_coding	0	23	6	116
																							DNA-directed RNA polymerase II subunit RPB2	B9J08_001045	B9J08_001045	protein_coding	0	35	0	213
																							DNA-directed RNA polymerase II subunit RPB9	B9J08_002787	B9J08_002787	protein_coding	0	2	0	109
																							DNA-directed RNA polymerase II subunit rpb7	B9J08_001047	B9J08_001047	protein_coding	0	4	0	192
																							DNA-directed RNA polymerase III subunit RPC1	B9J08_003780	B9J08_003780	protein_coding	0	59	6	352
																							DNA-directed RNA polymerase III subunit RPC2	B9J08_005110	B9J08_005110	protein_coding	2	37	6	123
																							E1-like protein-activating enzyme Gsa7p/Apg7p	B9J08_005131	B9J08_005131	protein_coding	0	15	10	96
																							E3 ubiquitin-protein ligase RSP5	B9J08_005071	B9J08_005071	protein_coding	0	30	1	199
																							ER-derived vesicles protein ERV14	B9J08_004759	B9J08_004759	protein_coding	0	0	0	143
																							FACT complex subunit POB3	B9J08_003645	B9J08_003645	protein_coding	0	6	4	161
																							FACT complex subunit SPT16	B9J08_002224	B9J08_002224	protein_coding	0	11	5	191
																							FK506-binding protein 1	B9J08_001031	B9J08_001031	protein_coding	0	2	1	94
																							Fe-S protein assembly co-chaperone HscB	B9J08_001652	B9J08_001652	protein_coding	0	2	1	122
																							G2/mitotic-specific cyclin-4	B9J08_004162	B9J08_004162	protein_coding	0	22	1	343
																							GDP-mannose transporter	B9J08_001592	B9J08_001592	protein_coding	0	2	2	141
																							GMP synthase [glutamine-hydrolyzing]	B9J08_005528	B9J08_005528	protein_coding	0	9	0	248
																							GPI ethanolamine phosphate transferase 1	B9J08_004046	B9J08_004046	protein_coding	0	13	8	83
																							GPI-anchor transamidase	B9J08_003157	B9J08_003157	protein_coding	0	3	1	130
																							GTP cyclohydrolase 1	B9J08_004299	B9J08_004299	protein_coding	0	8	0	207
																							GTP cyclohydrolase-2	B9J08_002449	B9J08_002449	protein_coding	0	9	1	391
																							GTP-binding nuclear protein GSP1/Ran	B9J08_000082	B9J08_000082	protein_coding	0	0	0	259
																							GTP-binding protein GTR2	B9J08_000371	B9J08_000371	protein_coding	0	16	1	254
																							GTP-binding protein RHO1	B9J08_003889	B9J08_003889	protein_coding	0	1	0	147
																							GTP-binding protein RHO3	B9J08_005030	B9J08_005030	protein_coding	0	0	1	125
																							GTP-binding protein YchF	B9J08_000223	B9J08_000223	protein_coding	0	11	4	329
																							GTP-binding protein ypt1	B9J08_003667	B9J08_003667	protein_coding	0	6	0	291
																							Grx4 family monothiol glutaredoxin	B9J08_002026	B9J08_002026	protein_coding	0	4	1	100
																							H/ACA ribonucleoprotein complex subunit 1	B9J08_001573	B9J08_001573	protein_coding	0	1	3	176
																							H/ACA ribonucleoprotein complex subunit 2	B9J08_004689	B9J08_004689	protein_coding	0	0	1	112
																							HAD phosphatase%2C family IIIA	B9J08_005407	B9J08_005407	protein_coding	0	3	0	194
																							ISWI chromatin-remodeling complex ATPase ISW2	B9J08_000045	B9J08_000045	protein_coding	0	38	8	202
																							KRR1 small subunit processome component	B9J08_001471	B9J08_001471	protein_coding	1	22	11	344
																							Kae1-associated kinase Bud32	B9J08_004406	B9J08_004406	protein_coding	0	1	3	297
																							L-aminoadipate-semialdehyde dehydrogenase	B9J08_003271	B9J08_003271	protein_coding	0	20	9	94
																							N-acetylglucosamine-6-phosphate deacetylase	B9J08_003838	B9J08_003838	protein_coding	1	6	0	144
																							N2%2CN2-dimethylguanosine tRNA methyltransferase	B9J08_003485	B9J08_003485	protein_coding	0	9	2	245
																							NAD(P)H:quinone oxidoreductase%2C type IV	B9J08_004838	B9J08_004838	protein_coding	0	8	1	226
																							NAD(P)H:quinone oxidoreductase%2C type IV	B9J08_004840	B9J08_004840	protein_coding	0	1	0	271
																							NAD+ synthetase	B9J08_003866	B9J08_003866	protein_coding	0	14	7	111
																							NADH dehydrogenase (quinone)%2C G subunit	B9J08_002759	B9J08_002759	protein_coding	0	14	1	83
																							NADH dehydrogenase [ubiquinone] iron-sulfur protein 8%2C mitochondrial	B9J08_002450	B9J08_002450	protein_coding	0	11	1	314
																							NADH-cytochrome b5 reductase 1	B9J08_003215	B9J08_003215	protein_coding	0	2	2	76
																							NADH-ubiquinone oxidoreductase 19.3 kDa subunit%2C mitochondrial	B9J08_004753	B9J08_004753	protein_coding	0	3	0	155
																							NADH-ubiquinone oxidoreductase 49 kDa subunit%2C mitochondrial	B9J08_003416	B9J08_003416	protein_coding	0	24	6	239
																							NADH-ubiquinone oxidoreductase 51 kDa subunit%2C mitochondrial	B9J08_003122	B9J08_003122	protein_coding	0	5	0	118
																							NADP-specific glutamate dehydrogenase	B9J08_000740	B9J08_000740	protein_coding	0	14	1	251
																							NADPH-dependent D-xylose reductase II%2CIII	B9J08_000812	B9J08_000812	protein_coding	0	11	3	311
																							OPT family small oligopeptide transporter	B9J08_001293	B9J08_001293	protein_coding	1	12	7	240
																							OPT family small oligopeptide transporter	B9J08_001998	B9J08_001998	protein_coding	0	11	1	106
																							OPT family small oligopeptide transporter	B9J08_004066	B9J08_004066	protein_coding	0	36	4	453
																							OPT family small oligopeptide transporter	B9J08_004479	B9J08_004479	protein_coding	0	21	3	231
																							OPT family small oligopeptide transporter	B9J08_004537	B9J08_004537	protein_coding	1	58	20	284
																							OPT family small oligopeptide transporter	B9J08_004538	B9J08_004538	protein_coding	1	42	11	267
																							OPT family small oligopeptide transporter	B9J08_004544	B9J08_004544	protein_coding	0	20	2	204
																							OPT family small oligopeptide transporter	B9J08_004545	B9J08_004545	protein_coding	0	55	10	348
																							OPT family small oligopeptide transporter	B9J08_004560	B9J08_004560	protein_coding	0	32	10	563
																							OPT family small oligopeptide transporter	B9J08_004562	B9J08_004562	protein_coding	1	34	10	295
																							OPT family small oligopeptide transporter	B9J08_004602	B9J08_004602	protein_coding	2	25	0	284
																							Poly(A) polymerase PAPa	B9J08_001453	B9J08_001453	protein_coding	0	6	3	178
																							RNA polymerase II holoenzyme cyclin-like subunit	B9J08_002100	B9J08_002100	protein_coding	0	6	2	113
																							RNA polymerase II transcription factor B subunit 2	B9J08_005113	B9J08_005113	protein_coding	0	8	1	184
																							Ras-like protein 1	B9J08_003446	B9J08_003446	protein_coding	0	2	2	231
																							RuvB-like helicase 1	B9J08_003774	B9J08_003774	protein_coding	0	20	1	560
																							RuvB-like helicase 2	B9J08_004932	B9J08_004932	protein_coding	0	5	1	194
																							S-(hydroxymethyl)glutathione dehydrogenase	B9J08_002769	B9J08_002769	protein_coding	0	5	3	91
																							S-adenosylmethionine decarboxylase proenzyme	B9J08_000433	B9J08_000433	protein_coding	0	13	1	346
																							S-adenosylmethionine synthase	B9J08_001467	B9J08_001467	protein_coding	0	9	0	562
																							S-formylglutathione hydrolase	B9J08_000559	B9J08_000559	protein_coding	0	14	4	138
																							S-methyl-5'-thioadenosine phosphorylase	B9J08_001684	B9J08_001684	protein_coding	0	3	0	167
																							S-methyl-5-thioribose-1-phosphate isomerase	B9J08_002822	B9J08_002822	protein_coding	0	2	6	68
																							SBDS family rRNA metabolism protein	B9J08_001384	B9J08_001384	protein_coding	0	4	0	116
																							SEC14 cytosolic factor	B9J08_000444	B9J08_000444	protein_coding	0	5	0	213
																							SUMO-conjugating enzyme UBC9	B9J08_000113	B9J08_000113	protein_coding	0	9	0	181
																							Sua5/YciO/YrdC/YwlC family tRNA threonylcarbamoyl adenosine modification protein	B9J08_000838	B9J08_000838	protein_coding	1	13	5	272
																							T-complex protein 1 subunit alpha	B9J08_000264	B9J08_000264	protein_coding	0	7	2	201
																							T-complex protein 1 subunit beta	B9J08_004992	B9J08_004992	protein_coding	0	22	2	426
																							T-complex protein 1 subunit delta	B9J08_002212	B9J08_002212	protein_coding	0	34	2	208
																							T-complex protein 1 subunit epsilon	B9J08_001136	B9J08_001136	protein_coding	0	28	2	140
																							T-complex protein 1 subunit eta	B9J08_001461	B9J08_001461	protein_coding	0	29	2	332
																							T-complex protein 1 subunit gamma	B9J08_004338	B9J08_004338	protein_coding	0	5	2	237
																							T-complex protein 1%2C theta subunit	B9J08_001271	B9J08_001271	protein_coding	0	8	2	262
																							T-complex protein 1%2C zeta subunit	B9J08_003771	B9J08_003771	protein_coding	0	28	1	550
																							TATA-box-binding protein 1	B9J08_001354	B9J08_001354	protein_coding	0	10	0	232
																							TIGR01456 family HAD hydrolase	B9J08_001039	B9J08_001039	protein_coding	0	7	1	180
																							TIGR01456 family HAD hydrolase	B9J08_002530	B9J08_002530	protein_coding	0	10	1	252
																							U3 small nucleolar ribonucleoprotein IMP3	B9J08_000699	B9J08_000699	protein_coding	0	5	0	186
																							U3 small nucleolar ribonucleoprotein IMP4	B9J08_002081	B9J08_002081	protein_coding	0	5	1	141
																							U6 snRNA-associated Sm-like protein LSm2	B9J08_005486	B9J08_005486	protein_coding	0	1	0	145
																							UPF0202 protein KRE33	B9J08_005488	B9J08_005488	protein_coding	2	46	7	148
																							UTP-glucose-1-phosphate uridylyltransferase	B9J08_001989	B9J08_001989	protein_coding	0	22	0	314
																							UV excision repair protein Rad23	B9J08_004856	B9J08_004856	protein_coding	0	10	9	451
																							V-type ATPase%2C F subunit	B9J08_000867	B9J08_000867	protein_coding	0	3	0	285
																							V-type ATPase%2C G subunit	B9J08_001150	B9J08_001150	protein_coding	0	2	1	104
																							V-type proton ATPase catalytic subunit A	B9J08_001893	B9J08_001893	protein_coding	0	27	3	161
																							V-type proton ATPase proteolipid subunit	B9J08_005509	B9J08_005509	protein_coding	0	0	0	167
																							V-type proton ATPase proteolipid subunit 2	B9J08_004933	B9J08_004933	protein_coding	0	4	0	205
																							V-type proton ATPase subunit B	B9J08_001701	B9J08_001701	protein_coding	0	10	1	102
																							V-type proton ATPase subunit C''	B9J08_001784	B9J08_001784	protein_coding	0	5	1	112
																							V-type proton ATPase subunit D	B9J08_000506	B9J08_000506	protein_coding	0	1	2	60
																							V-type proton ATPase subunit E	B9J08_001005	B9J08_001005	protein_coding	0	7	3	307
																							YbgI/family dinuclear metal center protein	B9J08_000743	B9J08_000743	protein_coding	0	2	3	197
																							YggS family pyridoxal phosphate enzyme	B9J08_003153	B9J08_003153	protein_coding	0	6	1	156
																							YjeF family domain-containing protein	B9J08_000944	B9J08_000944	protein_coding	0	11	4	227
																							YjeF family domain-containing protein	B9J08_003682	B9J08_003682	protein_coding	0	10	2	152
																							acetate non-utilizing protein 9%2C mitochondrial	B9J08_002733	B9J08_002733	protein_coding	0	1	0	118
																							acetolactate synthase small subunit%2C mitochondrial	B9J08_004459	B9J08_004459	protein_coding	0	12	2	409
																							acetolactate synthase%2C large subunit%2C biosynthetic type	B9J08_002629	B9J08_002629	protein_coding	0	23	1	192
																							acetyl-CoA acetyltransferase IA	B9J08_003730	B9J08_003730	protein_coding	0	10	0	204
																							acetyl-CoA hydrolase	B9J08_004702	B9J08_004702	protein_coding	0	7	1	97
																							acetyl-coenzyme A synthetase 1	B9J08_003998	B9J08_003998	protein_coding	0	14	1	261
																							acetyl-coenzyme A synthetase 2	B9J08_003365	B9J08_003365	protein_coding	0	15	3	250
																							aconitate hydratase%2C mitochondrial	B9J08_004914	B9J08_004914	protein_coding	0	24	1	283
																							actin	B9J08_000486	B9J08_000486	protein_coding	0	0	0	141
																							actin cytoskeleton-regulatory complex protein END3	B9J08_003299	B9J08_003299	protein_coding	0	8	2	101
																							acyl carrier protein	B9J08_001821	B9J08_001821	protein_coding	0	1	4	68
																							acyl carrier protein	B9J08_003625	B9J08_003625	protein_coding	0	2	1	126
																							acyl-CoA thioesterase II	B9J08_003185	B9J08_003185	protein_coding	0	11	1	163
																							acyl-CoA thioesterase II	B9J08_003186	B9J08_003186	protein_coding	0	8	1	167
																							acyl-CoA thioesterase II	B9J08_003187	B9J08_003187	protein_coding	0	14	0	158
																							adenine phosphoribosyltransferase	B9J08_003860	B9J08_003860	protein_coding	0	1	2	68
																							adenosine deaminase	B9J08_000319	B9J08_000319	protein_coding	0	8	10	185
																							adenosine deaminase	B9J08_005078	B9J08_005078	protein_coding	0	10	5	198
																							adenosylhomocysteinase	B9J08_004352	B9J08_004352	protein_coding	0	28	6	328
																							adenylate kinase	B9J08_005499	B9J08_005499	protein_coding	0	4	0	281
																							adenylosuccinate lyase	B9J08_000800	B9J08_000800	protein_coding	0	27	0	337
																							adenylosuccinate synthetase	B9J08_004225	B9J08_004225	protein_coding	0	7	0	69
																							adenylyl-sulfate kinase	B9J08_002995	B9J08_002995	protein_coding	0	5	2	111
																							agmatinase	B9J08_002587	B9J08_002587	protein_coding	1	17	8	165
																							agmatinase	B9J08_004531	B9J08_004531	protein_coding	1	9	2	228
																							alanine-tRNA ligase	B9J08_001122	B9J08_001122	protein_coding	0	17	7	166
																							alcohol dehydrogenase 1	B9J08_004331	B9J08_004331	protein_coding	0	11	1	238
																							alcohol dehydrogenase 2	B9J08_003614	B9J08_003614	protein_coding	0	11	1	334
																							allantoate permease	B9J08_004472	B9J08_004472	protein_coding	2	10	15	558
																							allantoicase	B9J08_001315	B9J08_001315	protein_coding	0	3	0	209
																							alpha%2Calpha-trehalose-phosphate synthase [UDP-forming]	B9J08_001695	B9J08_001695	protein_coding	0	4	2	149
																							alpha-glucosidase	B9J08_001255	B9J08_001255	protein_coding	0	3	1	82
																							amidophosphoribosyltransferase	B9J08_002290	B9J08_002290	protein_coding	0	30	1	279
																							aminodeoxychorismate synthase	B9J08_005218	B9J08_005218	protein_coding	0	3	6	77
																							aminopeptidase 2	B9J08_000023	B9J08_000023	protein_coding	0	38	8	206
																							anthranilate phosphoribosyltransferase	B9J08_003783	B9J08_003783	protein_coding	0	23	3	217
																							anthranilate synthase component I	B9J08_000379	B9J08_000379	protein_coding	0	13	1	191
																							arginase	B9J08_004292	B9J08_004292	protein_coding	0	16	4	353
																							arginine biosynthesis ArgJ%2C mitochondrial	B9J08_004682	B9J08_004682	protein_coding	0	7	4	135
																							arginine-tRNA ligase%2C cytoplasmic	B9J08_001049	B9J08_001049	protein_coding	0	23	4	358
																							argininosuccinate lyase	B9J08_002117	B9J08_002117	protein_coding	0	7	1	224
																							argininosuccinate synthase	B9J08_000686	B9J08_000686	protein_coding	0	14	2	234
																							arsenical-resistance protein	B9J08_000677	B9J08_000677	protein_coding	0	12	6	247
																							asparagine synthetase [glutamine-hydrolyzing] 2	B9J08_002429	B9J08_002429	protein_coding	0	25	0	235
																							asparagine-tRNA ligase	B9J08_002113	B9J08_002113	protein_coding	0	13	5	227
																							asparagine-tRNA ligase%2C cytoplasmic	B9J08_002116	B9J08_002116	protein_coding	0	17	3	241
																							aspartate-semialdehyde dehydrogenase	B9J08_003646	B9J08_003646	protein_coding	0	8	2	146
																							aspartate-tRNA ligase	B9J08_001999	B9J08_001999	protein_coding	0	8	6	103
																							aspartate-tRNA ligase%2C cytoplasmic	B9J08_004993	B9J08_004993	protein_coding	0	21	4	460
																							aspartyl/glutamyl-tRNA(Asn/Gln) amidotransferase%2C A subunit	B9J08_004298	B9J08_004298	protein_coding	0	18	4	178
																							aspartyl/glutamyl-tRNA(Asn/Gln) amidotransferase%2C B subunit	B9J08_005082	B9J08_005082	protein_coding	0	20	5	248
																							beta-ketoacyl-acyl-carrier-protein synthase II	B9J08_002264	B9J08_002264	protein_coding	0	9	2	227
																							bifunctional purine biosynthesis protein ADE17	B9J08_001850	B9J08_001850	protein_coding	0	25	0	177
																							biotin synthase%2C mitochondrial	B9J08_001884	B9J08_001884	protein_coding	0	4	5	107
																							branched-chain-amino-acid aminotransferase%2C cytosolic	B9J08_002453	B9J08_002453	protein_coding	0	18	1	257
																							cAMP-dependent protein kinase type 2	B9J08_002788	B9J08_002788	protein_coding	0	3	0	112
																							cAMP-dependent protein kinase type 3	B9J08_004030	B9J08_004030	protein_coding	1	6	0	205
																							calcineurin subunit B	B9J08_001732	B9J08_001732	protein_coding	0	2	0	70
																							calcium-translocating P-type ATPase%2C PMCA-type	B9J08_000175	B9J08_000175	protein_coding	2	76	18	246
																							calcium-transporting P-type ATPase%2C PMR1-type	B9J08_000837	B9J08_000837	protein_coding	0	43	3	295
																							calcium/proton exchanger	B9J08_000262	B9J08_000262	protein_coding	0	18	1	193
																							calcium/proton exchanger	B9J08_001254	B9J08_001254	protein_coding	0	10	9	124
																							calmodulin	B9J08_002876	B9J08_002876	protein_coding	0	0	0	68
																							carbamoyl-phosphate synthase arginine-specific large chain	B9J08_002469	B9J08_002469	protein_coding	0	41	13	325
																							carbamoyl-phosphate synthase arginine-specific small chain	B9J08_005231	B9J08_005231	protein_coding	0	3	1	89
																							carbon catabolite-derepressing protein kinase	B9J08_002060	B9J08_002060	protein_coding	0	17	2	110
																							casein kinase II subunit alpha'	B9J08_005003	B9J08_005003	protein_coding	0	5	1	292
																							catabolic 3-dehydroquinase	B9J08_002783	B9J08_002783	protein_coding	0	0	0	86
																							cell division control protein 10	B9J08_004834	B9J08_004834	protein_coding	0	10	1	313
																							cell division control protein 3	B9J08_003359	B9J08_003359	protein_coding	0	12	3	214
																							cell division control protein 31	B9J08_001843	B9J08_001843	protein_coding	0	20	3	228
																							cell division control protein 42	B9J08_000269	B9J08_000269	protein_coding	0	11	0	203
																							cell division control protein 48	B9J08_000480	B9J08_000480	protein_coding	0	37	4	229
																							centromere/microtubule-binding protein CBF5	B9J08_001358	B9J08_001358	protein_coding	2	6	1	219
																							chaperone DnaJ	B9J08_004701	B9J08_004701	protein_coding	0	2	2	110
																							chaperone DnaJ	B9J08_005368	B9J08_005368	protein_coding	0	12	0	195
																							chaperone DnaK	B9J08_000276	B9J08_000276	protein_coding	0	12	3	259
																							chaperone DnaK	B9J08_002819	B9J08_002819	protein_coding	0	12	0	89
																							chitin synthase 1	B9J08_003879	B9J08_003879	protein_coding	0	17	3	267
																							chorismate mutase	B9J08_003840	B9J08_003840	protein_coding	1	6	1	149
																							chorismate synthase	B9J08_000465	B9J08_000465	protein_coding	0	9	1	281
																							citrate synthase%2C mitochondrial	B9J08_002652	B9J08_002652	protein_coding	0	6	1	194
																							clathrin-associated protein AP-3 complex component APS3	B9J08_000272	B9J08_000272	protein_coding	0	5	0	185
																							coatomer subunit beta	B9J08_005544	B9J08_005544	protein_coding	0	0	0	3
																							cofilin	B9J08_001311	B9J08_001311	protein_coding	0	1	0	188
																							cyclin-dependent kinase 1	B9J08_002497	B9J08_002497	protein_coding	0	8	0	315
																							cyclin-dependent kinase regulatory subunit	B9J08_003115	B9J08_003115	protein_coding	0	1	0	104
																							cystathionine beta-lyase	B9J08_001645	B9J08_001645	protein_coding	0	9	2	111
																							cystathionine beta-synthase	B9J08_004618	B9J08_004618	protein_coding	0	25	2	330
																							cysteine desulfurase%2C mitochondrial	B9J08_000230	B9J08_000230	protein_coding	0	6	1	197
																							cysteine synthase	B9J08_005428	B9J08_005428	protein_coding	0	8	3	305
																							cysteine-tRNA ligase	B9J08_004145	B9J08_004145	protein_coding	0	44	13	288
																							cytidine deaminase	B9J08_003767	B9J08_003767	protein_coding	0	8	1	463
																							cytochrome b-c1 complex subunit 7	B9J08_001429	B9J08_001429	protein_coding	0	7	11	245
																							cytochrome c	B9J08_003804	B9J08_003804	protein_coding	0	3	0	210
																							cytochrome c heme lyase	B9J08_000424	B9J08_000424	protein_coding	0	10	1	407
																							cytochrome c oxidase assembly factor 3%2C mitochondrial	B9J08_005425	B9J08_005425	protein_coding	0	3	0	186
																							cytochrome c oxidase assembly protein COX16%2C mitochondrial	B9J08_001264	B9J08_001264	protein_coding	0	10	1	193
																							cytochrome c oxidase assembly protein COX19	B9J08_004635	B9J08_004635	protein_coding	0	0	0	301
																							cytochrome c oxidase subunit 6%2C mitochondrial	B9J08_004273	B9J08_004273	protein_coding	0	2	0	196
																							cytochrome c oxidase-assembly factor COX23%2C mitochondrial	B9J08_002642	B9J08_002642	protein_coding	0	1	2	225
																							cytochrome c1%2C heme protein%2C mitochondrial	B9J08_000173	B9J08_000173	protein_coding	0	4	1	242
																							cytoplasmic tRNA 2-thiolation protein 1	B9J08_003293	B9J08_003293	protein_coding	0	2	2	87
																							cytosolic Fe-S cluster assembly factor CFD1	B9J08_002395	B9J08_002395	protein_coding	0	12	3	265
																							cytosolic Fe-S cluster assembly factor NBP35	B9J08_004610	B9J08_004610	protein_coding	0	18	2	145
																							delta-aminolevulinic acid dehydratase	B9J08_004372	B9J08_004372	protein_coding	0	14	0	379
																							deoxyhypusine hydroxylase	B9J08_001135	B9J08_001135	protein_coding	0	2	0	176
																							deoxyhypusine synthase	B9J08_002638	B9J08_002638	protein_coding	0	3	2	226
																							deoxyuridine 5'-triphosphate nucleotidohydrolase	B9J08_002020	B9J08_002020	protein_coding	0	1	0	81
																							dephospho-CoA kinase	B9J08_003764	B9J08_003764	protein_coding	0	13	6	209
																							di-trans%2Cpoly-cis-decaprenylcistransferase	B9J08_003932	B9J08_003932	protein_coding	0	12	8	189
																							di-trans%2Cpoly-cis-decaprenylcistransferase	B9J08_005248	B9J08_005248	protein_coding	0	5	2	142
																							dihydrodipicolinate synthase	B9J08_001540	B9J08_001540	protein_coding	0	16	2	251
																							dihydrolipoyl dehydrogenase	B9J08_000976	B9J08_000976	protein_coding	0	10	3	272
																							dihydroorotase%2C homodimeric type	B9J08_002885	B9J08_002885	protein_coding	0	2	3	120
																							dihydroorotate dehydrogenase (quinone)%2C mitochondrial	B9J08_002742	B9J08_002742	protein_coding	0	8	0	169
																							dihydropteroate synthase	B9J08_001330	B9J08_001330	protein_coding	0	29	8	351
																							dihydroxy-acid dehydratase%2C mitochondrial	B9J08_000013	B9J08_000013	protein_coding	0	6	2	127
																							dihydroxyacetone kinase	B9J08_001368	B9J08_001368	protein_coding	0	20	10	385
																							dimethyladenosine transferase	B9J08_002508	B9J08_002508	protein_coding	0	6	0	273
																							diphosphomevalonate decarboxylase	B9J08_001266	B9J08_001266	protein_coding	0	14	4	256
																							diphthamide biosynthesis protein 1	B9J08_003177	B9J08_003177	protein_coding	0	7	1	99
																							diphthamide biosynthesis protein 2	B9J08_003525	B9J08_003525	protein_coding	0	23	17	239
																							diphthamide biosynthesis protein 3	B9J08_002960	B9J08_002960	protein_coding	2	2	3	208
																							diphthine synthase	B9J08_001543	B9J08_001543	protein_coding	0	22	1	287
																							dynein light chain 1%2C cytoplasmic	B9J08_003859	B9J08_003859	protein_coding	0	3	1	65
																							elongation factor 1-alpha 2	B9J08_003610	B9J08_003610	protein_coding	4	40	7	288
																							elongation factor 1-alpha 2	B9J08_004579	B9J08_004579	protein_coding	7	20	11	319
																							elongation factor 1-beta	B9J08_000914	B9J08_000914	protein_coding	0	6	1	172
																							elongation factor 2	B9J08_002772	B9J08_002772	protein_coding	0	20	4	141
																							elongation factor 3	B9J08_002813	B9J08_002813	protein_coding	0	10	5	110
																							elongation factor G%2C mitochondrial	B9J08_004147	B9J08_004147	protein_coding	0	21	1	433
																							elongation factor Tu%2C mitochondrial	B9J08_003238	B9J08_003238	protein_coding	0	10	0	92
																							elongator complex protein 3	B9J08_001912	B9J08_001912	protein_coding	0	8	1	75
																							enolase 2	B9J08_000274	B9J08_000274	protein_coding	4	15	10	140
																							eukaryotic peptide chain release factor subunit 1	B9J08_002484	B9J08_002484	protein_coding	2	22	4	337
																							eukaryotic translation initiation factor 1A	B9J08_001871	B9J08_001871	protein_coding	0	0	1	73
																							eukaryotic translation initiation factor 2 subunit gamma	B9J08_003894	B9J08_003894	protein_coding	0	23	1	418
																							eukaryotic translation initiation factor 3 subunit B	B9J08_003432	B9J08_003432	protein_coding	0	6	1	121
																							eukaryotic translation initiation factor 3 subunit G	B9J08_003055	B9J08_003055	protein_coding	0	8	1	145
																							eukaryotic translation initiation factor 3 subunit I	B9J08_002327	B9J08_002327	protein_coding	0	7	2	149
																							eukaryotic translation initiation factor 4E	B9J08_001243	B9J08_001243	protein_coding	0	1	0	230
																							eukaryotic translation initiation factor 5A	B9J08_005387	B9J08_005387	protein_coding	0	11	2	273
																							eukaryotic translation initiation factor 6	B9J08_000475	B9J08_000475	protein_coding	0	8	0	158
																							eukaryotic translation initiation factor eIF-1	B9J08_003118	B9J08_003118	protein_coding	0	1	0	128
																							extracellular signal-regulated kinase 1	B9J08_000458	B9J08_000458	protein_coding	0	10	4	373
																							farnesyl pyrophosphate synthase	B9J08_003125	B9J08_003125	protein_coding	0	3	4	143
																							farnesyl-diphosphate farnesyltransferase	B9J08_004587	B9J08_004587	protein_coding	0	9	2	176
																							fatty acid synthase subunit alpha	B9J08_002420	B9J08_002420	protein_coding	0	77	12	247
																							fatty acid synthase subunit beta	B9J08_001296	B9J08_001296	protein_coding	0	71	17	233
																							ferrochelatase	B9J08_001143	B9J08_001143	protein_coding	0	9	2	120
																							fimbrin	B9J08_001432	B9J08_001432	protein_coding	0	9	3	230
																							flap endonuclease 1	B9J08_002569	B9J08_002569	protein_coding	0	21	0	230
																							fructose-bisphosphate aldolase	B9J08_005239	B9J08_005239	protein_coding	0	4	0	73
																							fumarate hydratase%2C mitochondrial	B9J08_001207	B9J08_001207	protein_coding	0	5	0	97
																							gamma-glutamyltransferase	B9J08_003232	B9J08_003232	protein_coding	0	12	7	101
																							gamma-glutamyltransferase	B9J08_004466	B9J08_004466	protein_coding	0	15	14	432
																							glucosamine-6-phosphate isomerase	B9J08_003837	B9J08_003837	protein_coding	0	6	3	136
																							glucose-6-phosphate 1-dehydrogenase	B9J08_004550	B9J08_004550	protein_coding	0	9	3	245
																							glucose-6-phosphate isomerase	B9J08_000808	B9J08_000808	protein_coding	0	23	1	316
																							glutamate 5-kinase	B9J08_004124	B9J08_004124	protein_coding	0	10	1	285
																							glutamate decarboxylase	B9J08_001591	B9J08_001591	protein_coding	1	21	4	116
																							glutamate-5-semialdehyde dehydrogenase	B9J08_004764	B9J08_004764	protein_coding	0	11	3	235
																							glutamate-tRNA ligase	B9J08_000356	B9J08_000356	protein_coding	0	31	20	382
																							glutamate-tRNA ligase	B9J08_001156	B9J08_001156	protein_coding	0	20	8	140
																							glutamine synthetase	B9J08_004561	B9J08_004561	protein_coding	0	22	1	367
																							glutamine-fructose-6-phosphate aminotransferase [isomerizing]	B9J08_002632	B9J08_002632	protein_coding	0	10	2	258
																							glutamine-tRNA ligase	B9J08_003290	B9J08_003290	protein_coding	0	12	8	206
																							glutaredoxin	B9J08_002920	B9J08_002920	protein_coding	0	6	1	184
																							glutathione reductase	B9J08_003819	B9J08_003819	protein_coding	0	22	2	150
																							glutathione synthetase	B9J08_004998	B9J08_004998	protein_coding	0	28	9	590
																							glyceraldehyde-3-phosphate dehydrogenase	B9J08_001227	B9J08_001227	protein_coding	0	7	0	144
																							glyceraldehyde-3-phosphate dehydrogenase	B9J08_003306	B9J08_003306	protein_coding	0	1	0	133
																							glycerol kinase	B9J08_004380	B9J08_004380	protein_coding	0	24	2	600
																							glycerol-3-phosphate dehydrogenase (NAD(+))	B9J08_003684	B9J08_003684	protein_coding	0	12	2	149
																							glycerol-3-phosphate dehydrogenase [NAD(+)]	B9J08_003449	B9J08_003449	protein_coding	0	7	0	150
																							glycine cleavage system H protein	B9J08_000484	B9J08_000484	protein_coding	0	1	0	150
																							glycine cleavage system T protein	B9J08_001073	B9J08_001073	protein_coding	0	6	2	107
																							glycine dehydrogenase	B9J08_003609	B9J08_003609	protein_coding	0	33	12	259
																							glycine-tRNA ligase 1%2C mitochondrial	B9J08_003708	B9J08_003708	protein_coding	0	36	2	345
																							glycogen debranching enzyme	B9J08_005581	B9J08_005581	protein_coding	0	21	21	67
																							glycolate oxidase%2C subunit GlcD	B9J08_001883	B9J08_001883	protein_coding	0	7	3	137
																							glycolipid 2-alpha-mannosyltransferase 2	B9J08_001908	B9J08_001908	protein_coding	0	7	8	123
																							glycylpeptide N-tetradecanoyltransferase	B9J08_003296	B9J08_003296	protein_coding	0	3	1	72
																							golgi apparatus membrane protein TVP18	B9J08_004050	B9J08_004050	protein_coding	0	1	1	80
																							guanine deaminase	B9J08_004884	B9J08_004884	protein_coding	1	9	9	229
																							guanine deaminase	B9J08_005264	B9J08_005264	protein_coding	0	26	12	315
																							guanine nucleotide-binding protein subunit beta-like protein	B9J08_005458	B9J08_005458	protein_coding	0	12	1	158
																							guanylate kinase	B9J08_002495	B9J08_002495	protein_coding	0	3	2	256
																							heat shock protein 60%2C mitochondrial	B9J08_003991	B9J08_003991	protein_coding	0	15	1	182
																							heat shock protein 78%2C mitochondrial	B9J08_004285	B9J08_004285	protein_coding	0	18	7	144
																							heat shock protein SSA1	B9J08_000483	B9J08_000483	protein_coding	0	7	2	235
																							heat shock protein SSA2	B9J08_003364	B9J08_003364	protein_coding	2	27	2	240
																							heat shock protein SSB1	B9J08_000102	B9J08_000102	protein_coding	0	24	4	134
																							hexokinase	B9J08_002566	B9J08_002566	protein_coding	0	16	2	300
																							high osmolarity signaling protein SHO1	B9J08_001931	B9J08_001931	protein_coding	0	9	0	179
																							histidine protein kinase NIK1	B9J08_001959	B9J08_001959	protein_coding	0	12	0	139
																							histidine-tRNA ligase	B9J08_000788	B9J08_000788	protein_coding	0	27	9	194
																							histidinol dehydrogenase	B9J08_003463	B9J08_003463	protein_coding	0	18	9	207
																							histidinol-phosphate transaminase	B9J08_003531	B9J08_003531	protein_coding	0	6	5	194
																							histone	B9J08_002072	B9J08_002072	protein_coding	0	1	0	170
																							histone	B9J08_003368	B9J08_003368	protein_coding	0	8	0	173
																							histone	B9J08_004754	B9J08_004754	protein_coding	0	5	0	157
																							histone H2A.2	B9J08_005144	B9J08_005144	protein_coding	0	1	1	141
																							histone H2A.Z	B9J08_003996	B9J08_003996	protein_coding	0	3	0	319
																							histone H2B.2	B9J08_005145	B9J08_005145	protein_coding	0	0	0	172
																							histone H4	B9J08_002073	B9J08_002073	protein_coding	0	0	0	161
																							histone H4	B9J08_003369	B9J08_003369	protein_coding	0	3	0	188
																							histone acetyltransferase ESA1	B9J08_003814	B9J08_003814	protein_coding	0	3	0	163
																							histone acetyltransferase GCN5	B9J08_005133	B9J08_005133	protein_coding	0	14	3	91
																							histone chaperone ASF1	B9J08_002085	B9J08_002085	protein_coding	0	2	3	113
																							histone deacetylase RPD3	B9J08_004747	B9J08_004747	protein_coding	0	1	1	143
																							holo-[acyl-carrier-protein] synthase	B9J08_005527	B9J08_005527	protein_coding	0	1	1	210
																							homoaconitase%2C mitochondrial	B9J08_001756	B9J08_001756	protein_coding	0	18	7	221
																							homocitrate dehydratase%2C mitochondrial	B9J08_001702	B9J08_001702	protein_coding	0	19	5	92
																							homocitrate synthase%2C mitochondrial	B9J08_000015	B9J08_000015	protein_coding	2	54	5	113
																							homocitrate synthase%2C mitochondrial	B9J08_003722	B9J08_003722	protein_coding	0	20	7	310
																							homoserine O-acetyltransferase	B9J08_001578	B9J08_001578	protein_coding	0	16	11	198
																							homoserine O-acetyltransferase	B9J08_002708	B9J08_002708	protein_coding	0	4	2	98
																							homoserine kinase	B9J08_001447	B9J08_001447	protein_coding	0	10	2	179
																							hsp82-like protein	B9J08_004918	B9J08_004918	protein_coding	0	28	0	233
																							hydroxyacylglutathione hydrolase	B9J08_000682	B9J08_000682	protein_coding	0	2	2	239
																							hydroxyethylthiazole kinase	B9J08_001205	B9J08_001205	protein_coding	0	13	15	83
																							hydroxyisourate hydrolase	B9J08_005067	B9J08_005067	protein_coding	0	12	4	196
																							hydroxymethylglutaryl-CoA reductase (NADPH)	B9J08_003224	B9J08_003224	protein_coding	0	25	6	178
																							hydroxymethylglutaryl-CoA synthase	B9J08_004500	B9J08_004500	protein_coding	0	13	2	175
																							hypothetical protein	B9J08_000001	B9J08_000001	protein_coding	0	15	14	378
																							hypothetical protein	B9J08_000002	B9J08_000002	protein_coding	1	28	20	309
																							hypothetical protein	B9J08_000003	B9J08_000003	protein_coding	0	9	1	252
																							hypothetical protein	B9J08_000004	B9J08_000004	protein_coding	0	7	4	176
																							hypothetical protein	B9J08_000005	B9J08_000005	protein_coding	0	2	2	200
																							hypothetical protein	B9J08_000006	B9J08_000006	protein_coding	0	5	2	187
																							hypothetical protein	B9J08_000007	B9J08_000007	protein_coding	0	15	0	210
																							hypothetical protein	B9J08_000008	B9J08_000008	protein_coding	0	36	13	226
																							hypothetical protein	B9J08_000009	B9J08_000009	protein_coding	0	19	5	242
																							hypothetical protein	B9J08_000010	B9J08_000010	protein_coding	0	6	0	190
																							hypothetical protein	B9J08_000011	B9J08_000011	protein_coding	0	12	9	183
																							hypothetical protein	B9J08_000014	B9J08_000014	protein_coding	0	12	8	147
																							hypothetical protein	B9J08_000016	B9J08_000016	protein_coding	0	10	4	227
																							hypothetical protein	B9J08_000017	B9J08_000017	protein_coding	0	24	11	185
																							hypothetical protein	B9J08_000018	B9J08_000018	protein_coding	0	31	3	336
																							hypothetical protein	B9J08_000019	B9J08_000019	protein_coding	0	30	13	278
																							hypothetical protein	B9J08_000021	B9J08_000021	protein_coding	0	16	14	320
																							hypothetical protein	B9J08_000022	B9J08_000022	protein_coding	0	13	9	234
																							hypothetical protein	B9J08_000024	B9J08_000024	protein_coding	0	0	1	202
																							hypothetical protein	B9J08_000025	B9J08_000025	protein_coding	1	4	2	177
																							hypothetical protein	B9J08_000026	B9J08_000026	protein_coding	0	6	3	175
																							hypothetical protein	B9J08_000027	B9J08_000027	protein_coding	0	3	1	159
																							hypothetical protein	B9J08_000028	B9J08_000028	protein_coding	0	9	4	165
																							hypothetical protein	B9J08_000029	B9J08_000029	protein_coding	0	4	0	164
																							hypothetical protein	B9J08_000030	B9J08_000030	protein_coding	1	7	0	151
																							hypothetical protein	B9J08_000031	B9J08_000031	protein_coding	0	15	4	172
																							hypothetical protein	B9J08_000032	B9J08_000032	protein_coding	0	18	0	207
																							hypothetical protein	B9J08_000033	B9J08_000033	protein_coding	1	12	1	206
																							hypothetical protein	B9J08_000034	B9J08_000034	protein_coding	0	10	2	207
																							hypothetical protein	B9J08_000035	B9J08_000035	protein_coding	0	5	4	190
																							hypothetical protein	B9J08_000036	B9J08_000036	protein_coding	0	5	5	163
																							hypothetical protein	B9J08_000037	B9J08_000037	protein_coding	1	12	10	165
																							hypothetical protein	B9J08_000039	B9J08_000039	protein_coding	0	3	0	123
																							hypothetical protein	B9J08_000040	B9J08_000040	protein_coding	0	7	6	101
																							hypothetical protein	B9J08_000041	B9J08_000041	protein_coding	0	2	5	97
																							hypothetical protein	B9J08_000042	B9J08_000042	protein_coding	0	9	6	107
																							hypothetical protein	B9J08_000043	B9J08_000043	protein_coding	0	16	7	143
																							hypothetical protein	B9J08_000044	B9J08_000044	protein_coding	0	37	34	161
																							hypothetical protein	B9J08_000047	B9J08_000047	protein_coding	0	3	1	227
																							hypothetical protein	B9J08_000048	B9J08_000048	protein_coding	0	16	3	234
																							hypothetical protein	B9J08_000049	B9J08_000049	protein_coding	0	4	2	260
																							hypothetical protein	B9J08_000050	B9J08_000050	protein_coding	0	5	4	213
																							hypothetical protein	B9J08_000052	B9J08_000052	protein_coding	0	5	1	204
																							hypothetical protein	B9J08_000053	B9J08_000053	protein_coding	0	1	0	201
																							hypothetical protein	B9J08_000054	B9J08_000054	protein_coding	0	9	4	189
																							hypothetical protein	B9J08_000055	B9J08_000055	protein_coding	0	8	2	175
																							hypothetical protein	B9J08_000056	B9J08_000056	protein_coding	0	65	17	190
																							hypothetical protein	B9J08_000059	B9J08_000059	protein_coding	0	6	3	195
																							hypothetical protein	B9J08_000060	B9J08_000060	protein_coding	0	46	16	239
																							hypothetical protein	B9J08_000061	B9J08_000061	protein_coding	0	5	2	198
																							hypothetical protein	B9J08_000062	B9J08_000062	protein_coding	0	16	16	243
																							hypothetical protein	B9J08_000065	B9J08_000065	protein_coding	0	6	2	211
																							hypothetical protein	B9J08_000066	B9J08_000066	protein_coding	0	27	8	207
																							hypothetical protein	B9J08_000067	B9J08_000067	protein_coding	0	6	5	226
																							hypothetical protein	B9J08_000068	B9J08_000068	protein_coding	0	17	6	239
																							hypothetical protein	B9J08_000069	B9J08_000069	protein_coding	0	5	1	221
																							hypothetical protein	B9J08_000070	B9J08_000070	protein_coding	0	13	6	246
																							hypothetical protein	B9J08_000072	B9J08_000072	protein_coding	0	2	1	269
																							hypothetical protein	B9J08_000073	B9J08_000073	protein_coding	0	8	5	232
																							hypothetical protein	B9J08_000074	B9J08_000074	protein_coding	0	28	3	251
																							hypothetical protein	B9J08_000076	B9J08_000076	protein_coding	0	4	3	203
																							hypothetical protein	B9J08_000077	B9J08_000077	protein_coding	0	17	3	241
																							hypothetical protein	B9J08_000078	B9J08_000078	protein_coding	0	13	2	226
																							hypothetical protein	B9J08_000079	B9J08_000079	protein_coding	1	12	1	200
																							hypothetical protein	B9J08_000080	B9J08_000080	protein_coding	0	15	2	241
																							hypothetical protein	B9J08_000081	B9J08_000081	protein_coding	0	31	18	293
																							hypothetical protein	B9J08_000083	B9J08_000083	protein_coding	0	2	2	268
																							hypothetical protein	B9J08_000084	B9J08_000084	protein_coding	0	2	0	255
																							hypothetical protein	B9J08_000085	B9J08_000085	protein_coding	0	8	2	238
																							hypothetical protein	B9J08_000086	B9J08_000086	protein_coding	0	3	4	184
																							hypothetical protein	B9J08_000087	B9J08_000087	protein_coding	0	6	0	179
																							hypothetical protein	B9J08_000088	B9J08_000088	protein_coding	0	2	1	124
																							hypothetical protein	B9J08_000089	B9J08_000089	protein_coding	0	6	4	137
																							hypothetical protein	B9J08_000092	B9J08_000092	protein_coding	0	86	65	142
																							hypothetical protein	B9J08_000093	B9J08_000093	protein_coding	0	13	1	129
																							hypothetical protein	B9J08_000094	B9J08_000094	protein_coding	0	16	16	137
																							hypothetical protein	B9J08_000095	B9J08_000095	protein_coding	0	10	6	142
																							hypothetical protein	B9J08_000096	B9J08_000096	protein_coding	1	11	4	195
																							hypothetical protein	B9J08_000097	B9J08_000097	protein_coding	0	14	13	199
																							hypothetical protein	B9J08_000098	B9J08_000098	protein_coding	0	5	0	218
																							hypothetical protein	B9J08_000099	B9J08_000099	protein_coding	0	11	2	222
																							hypothetical protein	B9J08_000100	B9J08_000100	protein_coding	1	7	4	223
																							hypothetical protein	B9J08_000101	B9J08_000101	protein_coding	1	7	12	206
																							hypothetical protein	B9J08_000103	B9J08_000103	protein_coding	0	7	3	144
																							hypothetical protein	B9J08_000104	B9J08_000104	protein_coding	0	7	6	163
																							hypothetical protein	B9J08_000105	B9J08_000105	protein_coding	0	6	10	158
																							hypothetical protein	B9J08_000106	B9J08_000106	protein_coding	0	9	7	138
																							hypothetical protein	B9J08_000108	B9J08_000108	protein_coding	0	5	0	152
																							hypothetical protein	B9J08_000109	B9J08_000109	protein_coding	0	22	8	199
																							hypothetical protein	B9J08_000110	B9J08_000110	protein_coding	0	2	3	158
																							hypothetical protein	B9J08_000111	B9J08_000111	protein_coding	0	26	7	166
																							hypothetical protein	B9J08_000112	B9J08_000112	protein_coding	0	12	5	165
																							hypothetical protein	B9J08_000114	B9J08_000114	protein_coding	0	14	0	184
																							hypothetical protein	B9J08_000115	B9J08_000115	protein_coding	0	11	2	210
																							hypothetical protein	B9J08_000116	B9J08_000116	protein_coding	0	5	4	147
																							hypothetical protein	B9J08_000117	B9J08_000117	protein_coding	0	7	4	206
																							hypothetical protein	B9J08_000118	B9J08_000118	protein_coding	0	24	8	212
																							hypothetical protein	B9J08_000119	B9J08_000119	protein_coding	0	3	2	232
																							hypothetical protein	B9J08_000120	B9J08_000120	protein_coding	0	19	10	235
																							hypothetical protein	B9J08_000121	B9J08_000121	protein_coding	0	12	5	225
																							hypothetical protein	B9J08_000122	B9J08_000122	protein_coding	0	15	11	186
																							hypothetical protein	B9J08_000123	B9J08_000123	protein_coding	0	30	8	195
																							hypothetical protein	B9J08_000124	B9J08_000124	protein_coding	0	16	20	177
																							hypothetical protein	B9J08_000127	B9J08_000127	protein_coding	0	13	9	202
																							hypothetical protein	B9J08_000128	B9J08_000128	protein_coding	0	11	1	198
																							hypothetical protein	B9J08_000129	B9J08_000129	protein_coding	0	1	4	170
																							hypothetical protein	B9J08_000130	B9J08_000130	protein_coding	0	9	3	161
																							hypothetical protein	B9J08_000131	B9J08_000131	protein_coding	1	10	6	153
																							hypothetical protein	B9J08_000133	B9J08_000133	protein_coding	0	16	13	104
																							hypothetical protein	B9J08_000134	B9J08_000134	protein_coding	0	6	2	139
																							hypothetical protein	B9J08_000135	B9J08_000135	protein_coding	0	2	0	131
																							hypothetical protein	B9J08_000136	B9J08_000136	protein_coding	0	0	0	131
																							hypothetical protein	B9J08_000137	B9J08_000137	protein_coding	0	6	0	124
																							hypothetical protein	B9J08_000138	B9J08_000138	protein_coding	0	15	14	119
																							hypothetical protein	B9J08_000139	B9J08_000139	protein_coding	0	12	4	171
																							hypothetical protein	B9J08_000140	B9J08_000140	protein_coding	0	3	0	167
																							hypothetical protein	B9J08_000143	B9J08_000143	protein_coding	0	2	2	189
																							hypothetical protein	B9J08_000144	B9J08_000144	protein_coding	0	3	1	179
																							hypothetical protein	B9J08_000145	B9J08_000145	protein_coding	0	33	8	176
																							hypothetical protein	B9J08_000146	B9J08_000146	protein_coding	2	18	9	134
																							hypothetical protein	B9J08_000147	B9J08_000147	protein_coding	0	3	2	146
																							hypothetical protein	B9J08_000148	B9J08_000148	protein_coding	0	31	3	140
																							hypothetical protein	B9J08_000149	B9J08_000149	protein_coding	0	18	15	175
																							hypothetical protein	B9J08_000151	B9J08_000151	protein_coding	0	22	20	191
																							hypothetical protein	B9J08_000152	B9J08_000152	protein_coding	0	20	11	200
																							hypothetical protein	B9J08_000153	B9J08_000153	protein_coding	0	0	0	216
																							hypothetical protein	B9J08_000154	B9J08_000154	protein_coding	0	3	1	214
																							hypothetical protein	B9J08_000155	B9J08_000155	protein_coding	0	5	2	218
																							hypothetical protein	B9J08_000156	B9J08_000156	protein_coding	0	1	0	228
																							hypothetical protein	B9J08_000157	B9J08_000157	protein_coding	0	5	0	211
																							hypothetical protein	B9J08_000158	B9J08_000158	protein_coding	0	3	1	167
																							hypothetical protein	B9J08_000159	B9J08_000159	protein_coding	0	7	14	131
																							hypothetical protein	B9J08_000160	B9J08_000160	protein_coding	0	5	3	111
																							hypothetical protein	B9J08_000161	B9J08_000161	protein_coding	0	7	9	110
																							hypothetical protein	B9J08_000162	B9J08_000162	protein_coding	0	14	8	101
																							hypothetical protein	B9J08_000165	B9J08_000165	protein_coding	0	2	0	232
																							hypothetical protein	B9J08_000166	B9J08_000166	protein_coding	0	27	28	273
																							hypothetical protein	B9J08_000168	B9J08_000168	protein_coding	0	15	7	351
																							hypothetical protein	B9J08_000169	B9J08_000169	protein_coding	0	3	0	250
																							hypothetical protein	B9J08_000170	B9J08_000170	protein_coding	0	17	2	260
																							hypothetical protein	B9J08_000172	B9J08_000172	protein_coding	0	12	1	261
																							hypothetical protein	B9J08_000174	B9J08_000174	protein_coding	0	13	3	230
																							hypothetical protein	B9J08_000176	B9J08_000176	protein_coding	0	10	9	219
																							hypothetical protein	B9J08_000177	B9J08_000177	protein_coding	0	10	12	195
																							hypothetical protein	B9J08_000179	B9J08_000179	protein_coding	0	2	1	203
																							hypothetical protein	B9J08_000180	B9J08_000180	protein_coding	0	16	5	190
																							hypothetical protein	B9J08_000181	B9J08_000181	protein_coding	0	34	21	158
																							hypothetical protein	B9J08_000182	B9J08_000182	protein_coding	0	1	2	143
																							hypothetical protein	B9J08_000183	B9J08_000183	protein_coding	0	17	16	201
																							hypothetical protein	B9J08_000184	B9J08_000184	protein_coding	0	25	7	259
																							hypothetical protein	B9J08_000187	B9J08_000187	protein_coding	0	5	0	327
																							hypothetical protein	B9J08_000189	B9J08_000189	protein_coding	0	21	3	251
																							hypothetical protein	B9J08_000190	B9J08_000190	protein_coding	0	17	8	281
																							hypothetical protein	B9J08_000193	B9J08_000193	protein_coding	0	11	2	141
																							hypothetical protein	B9J08_000194	B9J08_000194	protein_coding	0	7	8	193
																							hypothetical protein	B9J08_000195	B9J08_000195	protein_coding	0	1	2	237
																							hypothetical protein	B9J08_000196	B9J08_000196	protein_coding	0	6	13	241
																							hypothetical protein	B9J08_000197	B9J08_000197	protein_coding	2	27	25	120
																							hypothetical protein	B9J08_000198	B9J08_000198	protein_coding	0	10	2	166
																							hypothetical protein	B9J08_000199	B9J08_000199	protein_coding	0	11	17	157
																							hypothetical protein	B9J08_000201	B9J08_000201	protein_coding	0	11	16	116
																							hypothetical protein	B9J08_000202	B9J08_000202	protein_coding	0	8	5	157
																							hypothetical protein	B9J08_000204	B9J08_000204	protein_coding	0	31	11	147
																							hypothetical protein	B9J08_000205	B9J08_000205	protein_coding	0	14	4	156
																							hypothetical protein	B9J08_000206	B9J08_000206	protein_coding	0	20	8	209
																							hypothetical protein	B9J08_000207	B9J08_000207	protein_coding	2	3	1	200
																							hypothetical protein	B9J08_000208	B9J08_000208	protein_coding	0	3	1	200
																							hypothetical protein	B9J08_000210	B9J08_000210	protein_coding	0	2	6	223
																							hypothetical protein	B9J08_000211	B9J08_000211	protein_coding	0	6	2	225
																							hypothetical protein	B9J08_000213	B9J08_000213	protein_coding	0	32	2	187
																							hypothetical protein	B9J08_000214	B9J08_000214	protein_coding	0	32	14	163
																							hypothetical protein	B9J08_000216	B9J08_000216	protein_coding	0	6	8	160
																							hypothetical protein	B9J08_000220	B9J08_000220	protein_coding	1	7	7	265
																							hypothetical protein	B9J08_000221	B9J08_000221	protein_coding	0	6	14	275
																							hypothetical protein	B9J08_000222	B9J08_000222	protein_coding	0	26	3	309
																							hypothetical protein	B9J08_000224	B9J08_000224	protein_coding	0	11	9	256
																							hypothetical protein	B9J08_000225	B9J08_000225	protein_coding	0	3	0	268
																							hypothetical protein	B9J08_000226	B9J08_000226	protein_coding	0	11	2	265
																							hypothetical protein	B9J08_000227	B9J08_000227	protein_coding	0	3	2	230
																							hypothetical protein	B9J08_000228	B9J08_000228	protein_coding	0	47	24	201
																							hypothetical protein	B9J08_000231	B9J08_000231	protein_coding	0	4	1	184
																							hypothetical protein	B9J08_000232	B9J08_000232	protein_coding	1	15	7	156
																							hypothetical protein	B9J08_000233	B9J08_000233	protein_coding	0	13	4	159
																							hypothetical protein	B9J08_000234	B9J08_000234	protein_coding	0	9	7	187
																							hypothetical protein	B9J08_000235	B9J08_000235	protein_coding	0	16	0	198
																							hypothetical protein	B9J08_000236	B9J08_000236	protein_coding	0	3	1	195
																							hypothetical protein	B9J08_000237	B9J08_000237	protein_coding	0	33	3	201
																							hypothetical protein	B9J08_000238	B9J08_000238	protein_coding	1	3	0	212
																							hypothetical protein	B9J08_000239	B9J08_000239	protein_coding	0	9	2	192
																							hypothetical protein	B9J08_000240	B9J08_000240	protein_coding	2	20	13	231
																							hypothetical protein	B9J08_000241	B9J08_000241	protein_coding	0	6	6	278
																							hypothetical protein	B9J08_000242	B9J08_000242	protein_coding	1	6	6	219
																							hypothetical protein	B9J08_000243	B9J08_000243	protein_coding	0	4	0	201
																							hypothetical protein	B9J08_000244	B9J08_000244	protein_coding	0	5	5	181
																							hypothetical protein	B9J08_000245	B9J08_000245	protein_coding	0	5	9	199
																							hypothetical protein	B9J08_000246	B9J08_000246	protein_coding	0	9	7	216
																							hypothetical protein	B9J08_000247	B9J08_000247	protein_coding	0	5	0	167
																							hypothetical protein	B9J08_000248	B9J08_000248	protein_coding	0	17	8	143
																							hypothetical protein	B9J08_000249	B9J08_000249	protein_coding	2	25	24	118
																							hypothetical protein	B9J08_000250	B9J08_000250	protein_coding	0	4	1	156
																							hypothetical protein	B9J08_000251	B9J08_000251	protein_coding	0	5	1	180
																							hypothetical protein	B9J08_000252	B9J08_000252	protein_coding	0	2	5	159
																							hypothetical protein	B9J08_000253	B9J08_000253	protein_coding	0	1	3	142
																							hypothetical protein	B9J08_000256	B9J08_000256	protein_coding	0	9	5	248
																							hypothetical protein	B9J08_000257	B9J08_000257	protein_coding	0	12	5	264
																							hypothetical protein	B9J08_000258	B9J08_000258	protein_coding	0	5	2	249
																							hypothetical protein	B9J08_000259	B9J08_000259	protein_coding	2	6	5	261
																							hypothetical protein	B9J08_000260	B9J08_000260	protein_coding	0	28	15	258
																							hypothetical protein	B9J08_000261	B9J08_000261	protein_coding	0	17	7	219
																							hypothetical protein	B9J08_000263	B9J08_000263	protein_coding	0	11	3	187
																							hypothetical protein	B9J08_000266	B9J08_000266	protein_coding	1	7	4	239
																							hypothetical protein	B9J08_000267	B9J08_000267	protein_coding	0	3	6	236
																							hypothetical protein	B9J08_000268	B9J08_000268	protein_coding	0	14	4	226
																							hypothetical protein	B9J08_000270	B9J08_000270	protein_coding	0	10	1	230
																							hypothetical protein	B9J08_000271	B9J08_000271	protein_coding	0	1	1	178
																							hypothetical protein	B9J08_000275	B9J08_000275	protein_coding	0	5	1	202
																							hypothetical protein	B9J08_000277	B9J08_000277	protein_coding	0	25	19	216
																							hypothetical protein	B9J08_000278	B9J08_000278	protein_coding	0	11	5	220
																							hypothetical protein	B9J08_000279	B9J08_000279	protein_coding	0	7	6	226
																							hypothetical protein	B9J08_000280	B9J08_000280	protein_coding	0	3	2	249
																							hypothetical protein	B9J08_000281	B9J08_000281	protein_coding	0	7	9	263
																							hypothetical protein	B9J08_000282	B9J08_000282	protein_coding	0	19	12	252
																							hypothetical protein	B9J08_000284	B9J08_000284	protein_coding	0	15	12	256
																							hypothetical protein	B9J08_000285	B9J08_000285	protein_coding	0	7	7	253
																							hypothetical protein	B9J08_000286	B9J08_000286	protein_coding	0	44	20	187
																							hypothetical protein	B9J08_000287	B9J08_000287	protein_coding	0	2	2	196
																							hypothetical protein	B9J08_000288	B9J08_000288	protein_coding	0	24	4	176
																							hypothetical protein	B9J08_000289	B9J08_000289	protein_coding	0	21	9	151
																							hypothetical protein	B9J08_000290	B9J08_000290	protein_coding	2	41	22	137
																							hypothetical protein	B9J08_000291	B9J08_000291	protein_coding	0	9	1	147
																							hypothetical protein	B9J08_000292	B9J08_000292	protein_coding	0	2	3	121
																							hypothetical protein	B9J08_000293	B9J08_000293	protein_coding	0	0	0	130
																							hypothetical protein	B9J08_000294	B9J08_000294	protein_coding	0	1	0	93
																							hypothetical protein	B9J08_000295	B9J08_000295	protein_coding	0	1	1	91
																							hypothetical protein	B9J08_000296	B9J08_000296	protein_coding	0	9	5	124
																							hypothetical protein	B9J08_000297	B9J08_000297	protein_coding	0	8	6	126
																							hypothetical protein	B9J08_000298	B9J08_000298	protein_coding	0	1	0	156
																							hypothetical protein	B9J08_000299	B9J08_000299	protein_coding	1	15	4	178
																							hypothetical protein	B9J08_000300	B9J08_000300	protein_coding	0	19	6	190
																							hypothetical protein	B9J08_000301	B9J08_000301	protein_coding	0	26	17	208
																							hypothetical protein	B9J08_000302	B9J08_000302	protein_coding	0	1	3	218
																							hypothetical protein	B9J08_000303	B9J08_000303	protein_coding	0	3	1	230
																							hypothetical protein	B9J08_000306	B9J08_000306	protein_coding	0	15	11	194
																							hypothetical protein	B9J08_000307	B9J08_000307	protein_coding	0	10	4	189
																							hypothetical protein	B9J08_000308	B9J08_000308	protein_coding	0	7	7	167
																							hypothetical protein	B9J08_000309	B9J08_000309	protein_coding	0	10	7	147
																							hypothetical protein	B9J08_000310	B9J08_000310	protein_coding	0	6	1	138
																							hypothetical protein	B9J08_000311	B9J08_000311	protein_coding	0	15	3	137
																							hypothetical protein	B9J08_000312	B9J08_000312	protein_coding	1	21	20	197
																							hypothetical protein	B9J08_000313	B9J08_000313	protein_coding	0	9	1	157
																							hypothetical protein	B9J08_000314	B9J08_000314	protein_coding	0	13	7	150
																							hypothetical protein	B9J08_000315	B9J08_000315	protein_coding	0	8	2	162
																							hypothetical protein	B9J08_000316	B9J08_000316	protein_coding	0	7	0	182
																							hypothetical protein	B9J08_000317	B9J08_000317	protein_coding	0	8	9	238
																							hypothetical protein	B9J08_000321	B9J08_000321	protein_coding	1	11	2	240
																							hypothetical protein	B9J08_000322	B9J08_000322	protein_coding	0	4	4	184
																							hypothetical protein	B9J08_000323	B9J08_000323	protein_coding	0	23	5	210
																							hypothetical protein	B9J08_000324	B9J08_000324	protein_coding	0	15	0	209
																							hypothetical protein	B9J08_000325	B9J08_000325	protein_coding	0	37	12	153
																							hypothetical protein	B9J08_000327	B9J08_000327	protein_coding	0	1	1	153
																							hypothetical protein	B9J08_000329	B9J08_000329	protein_coding	1	4	0	130
																							hypothetical protein	B9J08_000330	B9J08_000330	protein_coding	0	7	8	157
																							hypothetical protein	B9J08_000331	B9J08_000331	protein_coding	0	7	6	163
																							hypothetical protein	B9J08_000332	B9J08_000332	protein_coding	0	14	8	193
																							hypothetical protein	B9J08_000333	B9J08_000333	protein_coding	0	9	8	181
																							hypothetical protein	B9J08_000334	B9J08_000334	protein_coding	0	14	4	184
																							hypothetical protein	B9J08_000335	B9J08_000335	protein_coding	0	7	1	201
																							hypothetical protein	B9J08_000336	B9J08_000336	protein_coding	0	44	42	225
																							hypothetical protein	B9J08_000337	B9J08_000337	protein_coding	0	8	1	190
																							hypothetical protein	B9J08_000338	B9J08_000338	protein_coding	0	18	14	267
																							hypothetical protein	B9J08_000339	B9J08_000339	protein_coding	0	0	0	188
																							hypothetical protein	B9J08_000340	B9J08_000340	protein_coding	0	27	10	215
																							hypothetical protein	B9J08_000341	B9J08_000341	protein_coding	0	13	14	320
																							hypothetical protein	B9J08_000342	B9J08_000342	protein_coding	0	13	2	329
																							hypothetical protein	B9J08_000343	B9J08_000343	protein_coding	0	1	1	273
																							hypothetical protein	B9J08_000344	B9J08_000344	protein_coding	0	3	5	251
																							hypothetical protein	B9J08_000345	B9J08_000345	protein_coding	0	10	5	222
																							hypothetical protein	B9J08_000347	B9J08_000347	protein_coding	0	9	3	281
																							hypothetical protein	B9J08_000348	B9J08_000348	protein_coding	0	15	0	273
																							hypothetical protein	B9J08_000349	B9J08_000349	protein_coding	0	15	2	191
																							hypothetical protein	B9J08_000350	B9J08_000350	protein_coding	0	10	5	204
																							hypothetical protein	B9J08_000352	B9J08_000352	protein_coding	0	8	3	272
																							hypothetical protein	B9J08_000354	B9J08_000354	protein_coding	0	8	1	257
																							hypothetical protein	B9J08_000355	B9J08_000355	protein_coding	0	60	17	361
																							hypothetical protein	B9J08_000357	B9J08_000357	protein_coding	0	7	1	372
																							hypothetical protein	B9J08_000358	B9J08_000358	protein_coding	0	11	3	451
																							hypothetical protein	B9J08_000359	B9J08_000359	protein_coding	0	5	1	429
																							hypothetical protein	B9J08_000360	B9J08_000360	protein_coding	0	8	1	438
																							hypothetical protein	B9J08_000361	B9J08_000361	protein_coding	0	4	3	414
																							hypothetical protein	B9J08_000363	B9J08_000363	protein_coding	0	8	0	376
																							hypothetical protein	B9J08_000364	B9J08_000364	protein_coding	0	39	19	328
																							hypothetical protein	B9J08_000365	B9J08_000365	protein_coding	0	20	9	283
																							hypothetical protein	B9J08_000366	B9J08_000366	protein_coding	0	3	4	247
																							hypothetical protein	B9J08_000368	B9J08_000368	protein_coding	0	21	8	264
																							hypothetical protein	B9J08_000369	B9J08_000369	protein_coding	1	2	0	273
																							hypothetical protein	B9J08_000372	B9J08_000372	protein_coding	0	13	15	264
																							hypothetical protein	B9J08_000373	B9J08_000373	protein_coding	0	13	14	263
																							hypothetical protein	B9J08_000374	B9J08_000374	protein_coding	0	6	2	266
																							hypothetical protein	B9J08_000375	B9J08_000375	protein_coding	0	3	4	232
																							hypothetical protein	B9J08_000376	B9J08_000376	protein_coding	1	31	23	206
																							hypothetical protein	B9J08_000378	B9J08_000378	protein_coding	1	16	5	195
																							hypothetical protein	B9J08_000380	B9J08_000380	protein_coding	0	29	24	150
																							hypothetical protein	B9J08_000381	B9J08_000381	protein_coding	0	18	3	137
																							hypothetical protein	B9J08_000383	B9J08_000383	protein_coding	0	1	2	187
																							hypothetical protein	B9J08_000384	B9J08_000384	protein_coding	0	11	7	257
																							hypothetical protein	B9J08_000385	B9J08_000385	protein_coding	0	11	3	273
																							hypothetical protein	B9J08_000388	B9J08_000388	protein_coding	0	15	6	252
																							hypothetical protein	B9J08_000389	B9J08_000389	protein_coding	0	8	3	194
																							hypothetical protein	B9J08_000390	B9J08_000390	protein_coding	0	6	0	241
																							hypothetical protein	B9J08_000391	B9J08_000391	protein_coding	0	8	4	220
																							hypothetical protein	B9J08_000392	B9J08_000392	protein_coding	0	11	4	222
																							hypothetical protein	B9J08_000393	B9J08_000393	protein_coding	0	7	1	199
																							hypothetical protein	B9J08_000394	B9J08_000394	protein_coding	0	4	0	174
																							hypothetical protein	B9J08_000395	B9J08_000395	protein_coding	0	18	10	268
																							hypothetical protein	B9J08_000396	B9J08_000396	protein_coding	0	27	37	247
																							hypothetical protein	B9J08_000397	B9J08_000397	protein_coding	0	2	0	256
																							hypothetical protein	B9J08_000398	B9J08_000398	protein_coding	0	32	8	234
																							hypothetical protein	B9J08_000399	B9J08_000399	protein_coding	0	6	12	230
																							hypothetical protein	B9J08_000400	B9J08_000400	protein_coding	1	20	7	154
																							hypothetical protein	B9J08_000401	B9J08_000401	protein_coding	3	5	5	168
																							hypothetical protein	B9J08_000402	B9J08_000402	protein_coding	2	1	3	125
																							hypothetical protein	B9J08_000403	B9J08_000403	protein_coding	0	3	1	108
																							hypothetical protein	B9J08_000404	B9J08_000404	protein_coding	0	9	1	120
																							hypothetical protein	B9J08_000405	B9J08_000405	protein_coding	0	14	4	169
																							hypothetical protein	B9J08_000406	B9J08_000406	protein_coding	0	13	11	165
																							hypothetical protein	B9J08_000407	B9J08_000407	protein_coding	0	6	3	178
																							hypothetical protein	B9J08_000408	B9J08_000408	protein_coding	2	58	40	159
																							hypothetical protein	B9J08_000410	B9J08_000410	protein_coding	0	3	2	198
																							hypothetical protein	B9J08_000411	B9J08_000411	protein_coding	2	12	6	160
																							hypothetical protein	B9J08_000412	B9J08_000412	protein_coding	0	13	9	148
																							hypothetical protein	B9J08_000413	B9J08_000413	protein_coding	0	4	0	152
																							hypothetical protein	B9J08_000414	B9J08_000414	protein_coding	0	18	5	290
																							hypothetical protein	B9J08_000415	B9J08_000415	protein_coding	0	16	12	225
																							hypothetical protein	B9J08_000417	B9J08_000417	protein_coding	0	13	7	360
																							hypothetical protein	B9J08_000418	B9J08_000418	protein_coding	0	33	10	277
																							hypothetical protein	B9J08_000419	B9J08_000419	protein_coding	0	24	9	223
																							hypothetical protein	B9J08_000420	B9J08_000420	protein_coding	0	7	5	202
																							hypothetical protein	B9J08_000421	B9J08_000421	protein_coding	1	7	10	156
																							hypothetical protein	B9J08_000422	B9J08_000422	protein_coding	0	6	3	171
																							hypothetical protein	B9J08_000423	B9J08_000423	protein_coding	0	11	6	253
																							hypothetical protein	B9J08_000425	B9J08_000425	protein_coding	0	21	8	429
																							hypothetical protein	B9J08_000427	B9J08_000427	protein_coding	1	13	10	406
																							hypothetical protein	B9J08_000429	B9J08_000429	protein_coding	0	7	3	432
																							hypothetical protein	B9J08_000430	B9J08_000430	protein_coding	0	4	1	360
																							hypothetical protein	B9J08_000432	B9J08_000432	protein_coding	0	25	8	333
																							hypothetical protein	B9J08_000435	B9J08_000435	protein_coding	0	63	10	344
																							hypothetical protein	B9J08_000436	B9J08_000436	protein_coding	0	22	5	436
																							hypothetical protein	B9J08_000438	B9J08_000438	protein_coding	2	20	11	606
																							hypothetical protein	B9J08_000439	B9J08_000439	protein_coding	0	2	1	503
																							hypothetical protein	B9J08_000440	B9J08_000440	protein_coding	1	12	6	524
																							hypothetical protein	B9J08_000441	B9J08_000441	protein_coding	0	8	7	472
																							hypothetical protein	B9J08_000442	B9J08_000442	protein_coding	0	34	2	455
																							hypothetical protein	B9J08_000443	B9J08_000443	protein_coding	0	47	8	319
																							hypothetical protein	B9J08_000445	B9J08_000445	protein_coding	0	15	9	250
																							hypothetical protein	B9J08_000446	B9J08_000446	protein_coding	0	27	2	306
																							hypothetical protein	B9J08_000447	B9J08_000447	protein_coding	0	10	0	378
																							hypothetical protein	B9J08_000448	B9J08_000448	protein_coding	0	20	4	421
																							hypothetical protein	B9J08_000449	B9J08_000449	protein_coding	0	22	4	407
																							hypothetical protein	B9J08_000450	B9J08_000450	protein_coding	0	16	3	425
																							hypothetical protein	B9J08_000451	B9J08_000451	protein_coding	0	41	3	357
																							hypothetical protein	B9J08_000452	B9J08_000452	protein_coding	0	3	0	335
																							hypothetical protein	B9J08_000454	B9J08_000454	protein_coding	0	19	10	360
																							hypothetical protein	B9J08_000456	B9J08_000456	protein_coding	0	15	12	326
																							hypothetical protein	B9J08_000457	B9J08_000457	protein_coding	0	12	0	350
																							hypothetical protein	B9J08_000459	B9J08_000459	protein_coding	0	6	0	305
																							hypothetical protein	B9J08_000460	B9J08_000460	protein_coding	0	13	0	339
																							hypothetical protein	B9J08_000463	B9J08_000463	protein_coding	0	10	2	290
																							hypothetical protein	B9J08_000464	B9J08_000464	protein_coding	0	9	6	309
																							hypothetical protein	B9J08_000466	B9J08_000466	protein_coding	0	9	6	284
																							hypothetical protein	B9J08_000467	B9J08_000467	protein_coding	0	34	9	251
																							hypothetical protein	B9J08_000468	B9J08_000468	protein_coding	0	19	5	206
																							hypothetical protein	B9J08_000469	B9J08_000469	protein_coding	0	11	5	179
																							hypothetical protein	B9J08_000471	B9J08_000471	protein_coding	0	5	2	197
																							hypothetical protein	B9J08_000472	B9J08_000472	protein_coding	0	5	3	187
																							hypothetical protein	B9J08_000473	B9J08_000473	protein_coding	0	30	3	175
																							hypothetical protein	B9J08_000474	B9J08_000474	protein_coding	0	48	4	147
																							hypothetical protein	B9J08_000476	B9J08_000476	protein_coding	0	27	2	206
																							hypothetical protein	B9J08_000478	B9J08_000478	protein_coding	0	8	1	205
																							hypothetical protein	B9J08_000479	B9J08_000479	protein_coding	1	38	21	295
																							hypothetical protein	B9J08_000481	B9J08_000481	protein_coding	0	4	2	227
																							hypothetical protein	B9J08_000482	B9J08_000482	protein_coding	0	18	8	242
																							hypothetical protein	B9J08_000485	B9J08_000485	protein_coding	0	2	0	141
																							hypothetical protein	B9J08_000487	B9J08_000487	protein_coding	0	12	7	130
																							hypothetical protein	B9J08_000488	B9J08_000488	protein_coding	0	7	5	93
																							hypothetical protein	B9J08_000489	B9J08_000489	protein_coding	0	5	6	68
																							hypothetical protein	B9J08_000490	B9J08_000490	protein_coding	0	4	4	54
																							hypothetical protein	B9J08_000491	B9J08_000491	protein_coding	0	6	2	60
																							hypothetical protein	B9J08_000492	B9J08_000492	protein_coding	0	16	10	61
																							hypothetical protein	B9J08_000493	B9J08_000493	protein_coding	0	0	0	68
																							hypothetical protein	B9J08_000494	B9J08_000494	protein_coding	0	3	3	77
																							hypothetical protein	B9J08_000495	B9J08_000495	protein_coding	0	3	8	181
																							hypothetical protein	B9J08_000497	B9J08_000497	protein_coding	0	3	0	236
																							hypothetical protein	B9J08_000499	B9J08_000499	protein_coding	0	3	4	129
																							hypothetical protein	B9J08_000500	B9J08_000500	protein_coding	0	1	0	86
																							hypothetical protein	B9J08_000501	B9J08_000501	protein_coding	0	14	2	83
																							hypothetical protein	B9J08_000502	B9J08_000502	protein_coding	0	2	0	75
																							hypothetical protein	B9J08_000503	B9J08_000503	protein_coding	0	8	3	78
																							hypothetical protein	B9J08_000504	B9J08_000504	protein_coding	0	10	5	64
																							hypothetical protein	B9J08_000505	B9J08_000505	protein_coding	0	1	6	46
																							hypothetical protein	B9J08_000508	B9J08_000508	protein_coding	2	8	7	91
																							hypothetical protein	B9J08_000509	B9J08_000509	protein_coding	0	7	1	131
																							hypothetical protein	B9J08_000510	B9J08_000510	protein_coding	0	27	13	166
																							hypothetical protein	B9J08_000511	B9J08_000511	protein_coding	0	6	2	158
																							hypothetical protein	B9J08_000512	B9J08_000512	protein_coding	0	5	2	160
																							hypothetical protein	B9J08_000513	B9J08_000513	protein_coding	0	79	39	202
																							hypothetical protein	B9J08_000514	B9J08_000514	protein_coding	0	7	6	159
																							hypothetical protein	B9J08_000515	B9J08_000515	protein_coding	0	8	4	144
																							hypothetical protein	B9J08_000516	B9J08_000516	protein_coding	0	6	1	145
																							hypothetical protein	B9J08_000517	B9J08_000517	protein_coding	0	9	1	88
																							hypothetical protein	B9J08_000518	B9J08_000518	protein_coding	0	7	8	79
																							hypothetical protein	B9J08_000519	B9J08_000519	protein_coding	0	0	0	82
																							hypothetical protein	B9J08_000520	B9J08_000520	protein_coding	0	10	3	84
																							hypothetical protein	B9J08_000521	B9J08_000521	protein_coding	0	8	3	71
																							hypothetical protein	B9J08_000523	B9J08_000523	protein_coding	0	6	3	77
																							hypothetical protein	B9J08_000524	B9J08_000524	protein_coding	0	7	7	85
																							hypothetical protein	B9J08_000525	B9J08_000525	protein_coding	0	2	0	76
																							hypothetical protein	B9J08_000526	B9J08_000526	protein_coding	0	5	11	80
																							hypothetical protein	B9J08_000527	B9J08_000527	protein_coding	0	1	0	82
																							hypothetical protein	B9J08_000529	B9J08_000529	protein_coding	0	8	2	138
																							hypothetical protein	B9J08_000530	B9J08_000530	protein_coding	0	13	4	127
																							hypothetical protein	B9J08_000531	B9J08_000531	protein_coding	0	3	2	122
																							hypothetical protein	B9J08_000532	B9J08_000532	protein_coding	0	2	1	133
																							hypothetical protein	B9J08_000533	B9J08_000533	protein_coding	0	11	1	120
																							hypothetical protein	B9J08_000534	B9J08_000534	protein_coding	0	5	13	129
																							hypothetical protein	B9J08_000535	B9J08_000535	protein_coding	0	3	1	112
																							hypothetical protein	B9J08_000536	B9J08_000536	protein_coding	0	4	3	133
																							hypothetical protein	B9J08_000538	B9J08_000538	protein_coding	0	2	1	154
																							hypothetical protein	B9J08_000539	B9J08_000539	protein_coding	0	13	2	151
																							hypothetical protein	B9J08_000540	B9J08_000540	protein_coding	3	14	19	137
																							hypothetical protein	B9J08_000541	B9J08_000541	protein_coding	0	5	3	186
																							hypothetical protein	B9J08_000542	B9J08_000542	protein_coding	0	33	9	214
																							hypothetical protein	B9J08_000544	B9J08_000544	protein_coding	0	17	8	210
																							hypothetical protein	B9J08_000545	B9J08_000545	protein_coding	0	6	0	188
																							hypothetical protein	B9J08_000546	B9J08_000546	protein_coding	0	21	11	156
																							hypothetical protein	B9J08_000547	B9J08_000547	protein_coding	0	13	17	168
																							hypothetical protein	B9J08_000548	B9J08_000548	protein_coding	0	5	2	137
																							hypothetical protein	B9J08_000549	B9J08_000549	protein_coding	0	5	5	153
																							hypothetical protein	B9J08_000550	B9J08_000550	protein_coding	0	7	1	141
																							hypothetical protein	B9J08_000551	B9J08_000551	protein_coding	0	8	0	165
																							hypothetical protein	B9J08_000552	B9J08_000552	protein_coding	0	18	3	185
																							hypothetical protein	B9J08_000553	B9J08_000553	protein_coding	0	3	0	198
																							hypothetical protein	B9J08_000555	B9J08_000555	protein_coding	0	13	3	237
																							hypothetical protein	B9J08_000556	B9J08_000556	protein_coding	0	7	1	216
																							hypothetical protein	B9J08_000557	B9J08_000557	protein_coding	0	3	3	155
																							hypothetical protein	B9J08_000558	B9J08_000558	protein_coding	1	12	2	144
																							hypothetical protein	B9J08_000560	B9J08_000560	protein_coding	0	8	7	174
																							hypothetical protein	B9J08_000561	B9J08_000561	protein_coding	0	5	5	207
																							hypothetical protein	B9J08_000562	B9J08_000562	protein_coding	1	6	11	242
																							hypothetical protein	B9J08_000563	B9J08_000563	protein_coding	0	33	8	240
																							hypothetical protein	B9J08_000566	B9J08_000566	protein_coding	0	4	1	292
																							hypothetical protein	B9J08_000567	B9J08_000567	protein_coding	0	5	1	254
																							hypothetical protein	B9J08_000568	B9J08_000568	protein_coding	0	10	7	290
																							hypothetical protein	B9J08_000569	B9J08_000569	protein_coding	0	17	5	260
																							hypothetical protein	B9J08_000570	B9J08_000570	protein_coding	0	5	1	236
																							hypothetical protein	B9J08_000571	B9J08_000571	protein_coding	0	8	2	242
																							hypothetical protein	B9J08_000572	B9J08_000572	protein_coding	3	40	28	194
																							hypothetical protein	B9J08_000573	B9J08_000573	protein_coding	1	10	4	237
																							hypothetical protein	B9J08_000574	B9J08_000574	protein_coding	0	17	6	195
																							hypothetical protein	B9J08_000575	B9J08_000575	protein_coding	0	26	6	187
																							hypothetical protein	B9J08_000576	B9J08_000576	protein_coding	0	46	8	193
																							hypothetical protein	B9J08_000577	B9J08_000577	protein_coding	0	12	1	165
																							hypothetical protein	B9J08_000578	B9J08_000578	protein_coding	0	17	4	195
																							hypothetical protein	B9J08_000579	B9J08_000579	protein_coding	0	3	1	227
																							hypothetical protein	B9J08_000580	B9J08_000580	protein_coding	0	9	7	176
																							hypothetical protein	B9J08_000581	B9J08_000581	protein_coding	0	31	2	232
																							hypothetical protein	B9J08_000582	B9J08_000582	protein_coding	0	12	4	278
																							hypothetical protein	B9J08_000583	B9J08_000583	protein_coding	0	17	8	244
																							hypothetical protein	B9J08_000584	B9J08_000584	protein_coding	0	4	5	271
																							hypothetical protein	B9J08_000586	B9J08_000586	protein_coding	0	3	2	230
																							hypothetical protein	B9J08_000587	B9J08_000587	protein_coding	0	3	0	185
																							hypothetical protein	B9J08_000588	B9J08_000588	protein_coding	0	27	5	180
																							hypothetical protein	B9J08_000589	B9J08_000589	protein_coding	0	3	1	180
																							hypothetical protein	B9J08_000590	B9J08_000590	protein_coding	1	8	6	178
																							hypothetical protein	B9J08_000591	B9J08_000591	protein_coding	0	25	6	160
																							hypothetical protein	B9J08_000592	B9J08_000592	protein_coding	1	1	4	152
																							hypothetical protein	B9J08_000593	B9J08_000593	protein_coding	0	5	4	177
																							hypothetical protein	B9J08_000594	B9J08_000594	protein_coding	0	30	19	160
																							hypothetical protein	B9J08_000595	B9J08_000595	protein_coding	0	4	6	182
																							hypothetical protein	B9J08_000596	B9J08_000596	protein_coding	0	28	9	154
																							hypothetical protein	B9J08_000597	B9J08_000597	protein_coding	0	5	7	145
																							hypothetical protein	B9J08_000598	B9J08_000598	protein_coding	0	0	1	143
																							hypothetical protein	B9J08_000599	B9J08_000599	protein_coding	0	9	17	137
																							hypothetical protein	B9J08_000600	B9J08_000600	protein_coding	0	3	5	90
																							hypothetical protein	B9J08_000601	B9J08_000601	protein_coding	0	5	4	104
																							hypothetical protein	B9J08_000603	B9J08_000603	protein_coding	0	2	0	153
																							hypothetical protein	B9J08_000606	B9J08_000606	protein_coding	0	14	3	229
																							hypothetical protein	B9J08_000607	B9J08_000607	protein_coding	0	9	2	242
																							hypothetical protein	B9J08_000608	B9J08_000608	protein_coding	0	16	6	207
																							hypothetical protein	B9J08_000609	B9J08_000609	protein_coding	0	13	5	191
																							hypothetical protein	B9J08_000610	B9J08_000610	protein_coding	0	45	22	259
																							hypothetical protein	B9J08_000611	B9J08_000611	protein_coding	0	39	15	342
																							hypothetical protein	B9J08_000612	B9J08_000612	protein_coding	0	17	6	340
																							hypothetical protein	B9J08_000613	B9J08_000613	protein_coding	0	78	6	430
																							hypothetical protein	B9J08_000614	B9J08_000614	protein_coding	6	34	30	315
																							hypothetical protein	B9J08_000615	B9J08_000615	protein_coding	1	12	6	361
																							hypothetical protein	B9J08_000616	B9J08_000616	protein_coding	0	14	0	361
																							hypothetical protein	B9J08_000617	B9J08_000617	protein_coding	0	3	2	279
																							hypothetical protein	B9J08_000618	B9J08_000618	protein_coding	0	3	1	257
																							hypothetical protein	B9J08_000620	B9J08_000620	protein_coding	1	12	9	239
																							hypothetical protein	B9J08_000621	B9J08_000621	protein_coding	0	4	2	214
																							hypothetical protein	B9J08_000623	B9J08_000623	protein_coding	0	17	14	225
																							hypothetical protein	B9J08_000624	B9J08_000624	protein_coding	0	9	9	241
																							hypothetical protein	B9J08_000625	B9J08_000625	protein_coding	0	5	0	261
																							hypothetical protein	B9J08_000626	B9J08_000626	protein_coding	0	21	6	244
																							hypothetical protein	B9J08_000627	B9J08_000627	protein_coding	0	9	3	247
																							hypothetical protein	B9J08_000628	B9J08_000628	protein_coding	0	34	52	195
																							hypothetical protein	B9J08_000629	B9J08_000629	protein_coding	0	3	5	207
																							hypothetical protein	B9J08_000630	B9J08_000630	protein_coding	0	7	1	181
																							hypothetical protein	B9J08_000631	B9J08_000631	protein_coding	0	35	3	188
																							hypothetical protein	B9J08_000633	B9J08_000633	protein_coding	0	11	9	276
																							hypothetical protein	B9J08_000634	B9J08_000634	protein_coding	2	11	11	275
																							hypothetical protein	B9J08_000635	B9J08_000635	protein_coding	0	6	5	303
																							hypothetical protein	B9J08_000636	B9J08_000636	protein_coding	0	25	1	289
																							hypothetical protein	B9J08_000637	B9J08_000637	protein_coding	2	22	7	280
																							hypothetical protein	B9J08_000638	B9J08_000638	protein_coding	0	8	0	270
																							hypothetical protein	B9J08_000639	B9J08_000639	protein_coding	1	18	13	162
																							hypothetical protein	B9J08_000640	B9J08_000640	protein_coding	0	6	7	175
																							hypothetical protein	B9J08_000642	B9J08_000642	protein_coding	0	10	9	208
																							hypothetical protein	B9J08_000643	B9J08_000643	protein_coding	0	26	3	242
																							hypothetical protein	B9J08_000644	B9J08_000644	protein_coding	1	6	11	244
																							hypothetical protein	B9J08_000646	B9J08_000646	protein_coding	0	9	4	245
																							hypothetical protein	B9J08_000647	B9J08_000647	protein_coding	0	2	0	279
																							hypothetical protein	B9J08_000648	B9J08_000648	protein_coding	0	6	0	241
																							hypothetical protein	B9J08_000650	B9J08_000650	protein_coding	0	11	1	220
																							hypothetical protein	B9J08_000651	B9J08_000651	protein_coding	0	27	6	262
																							hypothetical protein	B9J08_000652	B9J08_000652	protein_coding	0	7	4	255
																							hypothetical protein	B9J08_000653	B9J08_000653	protein_coding	1	16	15	254
																							hypothetical protein	B9J08_000654	B9J08_000654	protein_coding	0	5	3	231
																							hypothetical protein	B9J08_000656	B9J08_000656	protein_coding	0	6	4	214
																							hypothetical protein	B9J08_000657	B9J08_000657	protein_coding	0	25	6	233
																							hypothetical protein	B9J08_000658	B9J08_000658	protein_coding	0	16	8	245
																							hypothetical protein	B9J08_000660	B9J08_000660	protein_coding	0	3	0	254
																							hypothetical protein	B9J08_000661	B9J08_000661	protein_coding	2	9	5	290
																							hypothetical protein	B9J08_000662	B9J08_000662	protein_coding	0	29	16	201
																							hypothetical protein	B9J08_000663	B9J08_000663	protein_coding	0	2	2	208
																							hypothetical protein	B9J08_000664	B9J08_000664	protein_coding	2	10	13	198
																							hypothetical protein	B9J08_000666	B9J08_000666	protein_coding	0	15	4	206
																							hypothetical protein	B9J08_000667	B9J08_000667	protein_coding	0	2	0	216
																							hypothetical protein	B9J08_000669	B9J08_000669	protein_coding	0	2	6	227
																							hypothetical protein	B9J08_000671	B9J08_000671	protein_coding	0	6	2	293
																							hypothetical protein	B9J08_000672	B9J08_000672	protein_coding	1	14	20	254
																							hypothetical protein	B9J08_000674	B9J08_000674	protein_coding	0	13	4	298
																							hypothetical protein	B9J08_000675	B9J08_000675	protein_coding	0	95	35	310
																							hypothetical protein	B9J08_000676	B9J08_000676	protein_coding	0	5	5	245
																							hypothetical protein	B9J08_000678	B9J08_000678	protein_coding	0	4	0	229
																							hypothetical protein	B9J08_000679	B9J08_000679	protein_coding	0	7	1	185
																							hypothetical protein	B9J08_000680	B9J08_000680	protein_coding	0	26	10	227
																							hypothetical protein	B9J08_000681	B9J08_000681	protein_coding	0	11	4	216
																							hypothetical protein	B9J08_000683	B9J08_000683	protein_coding	0	16	4	261
																							hypothetical protein	B9J08_000684	B9J08_000684	protein_coding	0	26	8	293
																							hypothetical protein	B9J08_000685	B9J08_000685	protein_coding	0	32	19	214
																							hypothetical protein	B9J08_000687	B9J08_000687	protein_coding	0	19	15	255
																							hypothetical protein	B9J08_000688	B9J08_000688	protein_coding	0	16	6	159
																							hypothetical protein	B9J08_000689	B9J08_000689	protein_coding	0	17	6	124
																							hypothetical protein	B9J08_000690	B9J08_000690	protein_coding	0	9	6	174
																							hypothetical protein	B9J08_000691	B9J08_000691	protein_coding	0	15	6	159
																							hypothetical protein	B9J08_000692	B9J08_000692	protein_coding	0	3	0	103
																							hypothetical protein	B9J08_000693	B9J08_000693	protein_coding	0	20	1	267
																							hypothetical protein	B9J08_000695	B9J08_000695	protein_coding	0	41	2	302
																							hypothetical protein	B9J08_000696	B9J08_000696	protein_coding	0	12	2	310
																							hypothetical protein	B9J08_000698	B9J08_000698	protein_coding	0	4	0	193
																							hypothetical protein	B9J08_000700	B9J08_000700	protein_coding	0	18	11	214
																							hypothetical protein	B9J08_000701	B9J08_000701	protein_coding	0	23	5	219
																							hypothetical protein	B9J08_000702	B9J08_000702	protein_coding	0	6	6	183
																							hypothetical protein	B9J08_000703	B9J08_000703	protein_coding	0	6	2	184
																							hypothetical protein	B9J08_000704	B9J08_000704	protein_coding	0	49	8	245
																							hypothetical protein	B9J08_000706	B9J08_000706	protein_coding	0	24	14	243
																							hypothetical protein	B9J08_000707	B9J08_000707	protein_coding	0	24	5	178
																							hypothetical protein	B9J08_000708	B9J08_000708	protein_coding	0	5	5	194
																							hypothetical protein	B9J08_000709	B9J08_000709	protein_coding	0	9	2	201
																							hypothetical protein	B9J08_000710	B9J08_000710	protein_coding	0	17	4	230
																							hypothetical protein	B9J08_000712	B9J08_000712	protein_coding	0	14	12	228
																							hypothetical protein	B9J08_000714	B9J08_000714	protein_coding	0	65	22	264
																							hypothetical protein	B9J08_000715	B9J08_000715	protein_coding	0	4	0	300
																							hypothetical protein	B9J08_000716	B9J08_000716	protein_coding	0	12	6	295
																							hypothetical protein	B9J08_000717	B9J08_000717	protein_coding	0	27	30	269
																							hypothetical protein	B9J08_000718	B9J08_000718	protein_coding	0	21	6	265
																							hypothetical protein	B9J08_000719	B9J08_000719	protein_coding	0	7	8	212
																							hypothetical protein	B9J08_000720	B9J08_000720	protein_coding	0	20	15	274
																							hypothetical protein	B9J08_000721	B9J08_000721	protein_coding	0	5	2	287
																							hypothetical protein	B9J08_000722	B9J08_000722	protein_coding	0	12	1	285
																							hypothetical protein	B9J08_000724	B9J08_000724	protein_coding	0	0	0	271
																							hypothetical protein	B9J08_000725	B9J08_000725	protein_coding	0	44	11	286
																							hypothetical protein	B9J08_000726	B9J08_000726	protein_coding	0	20	11	200
																							hypothetical protein	B9J08_000728	B9J08_000728	protein_coding	0	3	2	200
																							hypothetical protein	B9J08_000729	B9J08_000729	protein_coding	0	21	4	236
																							hypothetical protein	B9J08_000730	B9J08_000730	protein_coding	0	14	11	189
																							hypothetical protein	B9J08_000731	B9J08_000731	protein_coding	0	65	6	175
																							hypothetical protein	B9J08_000732	B9J08_000732	protein_coding	0	21	0	218
																							hypothetical protein	B9J08_000733	B9J08_000733	protein_coding	0	17	5	206
																							hypothetical protein	B9J08_000734	B9J08_000734	protein_coding	0	7	2	159
																							hypothetical protein	B9J08_000735	B9J08_000735	protein_coding	0	29	14	163
																							hypothetical protein	B9J08_000736	B9J08_000736	protein_coding	1	12	20	178
																							hypothetical protein	B9J08_000737	B9J08_000737	protein_coding	0	12	5	261
																							hypothetical protein	B9J08_000738	B9J08_000738	protein_coding	0	20	5	248
																							hypothetical protein	B9J08_000739	B9J08_000739	protein_coding	0	34	11	250
																							hypothetical protein	B9J08_000741	B9J08_000741	protein_coding	0	1	4	276
																							hypothetical protein	B9J08_000742	B9J08_000742	protein_coding	0	21	16	239
																							hypothetical protein	B9J08_000746	B9J08_000746	protein_coding	0	10	3	172
																							hypothetical protein	B9J08_000747	B9J08_000747	protein_coding	0	2	1	165
																							hypothetical protein	B9J08_000748	B9J08_000748	protein_coding	0	19	4	245
																							hypothetical protein	B9J08_000749	B9J08_000749	protein_coding	0	4	3	192
																							hypothetical protein	B9J08_000750	B9J08_000750	protein_coding	0	2	2	216
																							hypothetical protein	B9J08_000751	B9J08_000751	protein_coding	0	8	5	151
																							hypothetical protein	B9J08_000752	B9J08_000752	protein_coding	0	26	6	246
																							hypothetical protein	B9J08_000753	B9J08_000753	protein_coding	0	18	12	297
																							hypothetical protein	B9J08_000754	B9J08_000754	protein_coding	2	28	10	289
																							hypothetical protein	B9J08_000755	B9J08_000755	protein_coding	0	16	1	326
																							hypothetical protein	B9J08_000756	B9J08_000756	protein_coding	0	23	3	316
																							hypothetical protein	B9J08_000757	B9J08_000757	protein_coding	0	14	0	201
																							hypothetical protein	B9J08_000758	B9J08_000758	protein_coding	0	18	2	221
																							hypothetical protein	B9J08_000759	B9J08_000759	protein_coding	0	21	3	234
																							hypothetical protein	B9J08_000760	B9J08_000760	protein_coding	0	7	1	201
																							hypothetical protein	B9J08_000761	B9J08_000761	protein_coding	0	2	0	227
																							hypothetical protein	B9J08_000762	B9J08_000762	protein_coding	0	25	7	240
																							hypothetical protein	B9J08_000765	B9J08_000765	protein_coding	0	9	4	236
																							hypothetical protein	B9J08_000766	B9J08_000766	protein_coding	1	11	3	187
																							hypothetical protein	B9J08_000767	B9J08_000767	protein_coding	0	5	13	174
																							hypothetical protein	B9J08_000768	B9J08_000768	protein_coding	0	8	2	195
																							hypothetical protein	B9J08_000769	B9J08_000769	protein_coding	0	5	7	234
																							hypothetical protein	B9J08_000770	B9J08_000770	protein_coding	0	20	19	280
																							hypothetical protein	B9J08_000772	B9J08_000772	protein_coding	0	13	3	310
																							hypothetical protein	B9J08_000773	B9J08_000773	protein_coding	0	25	31	239
																							hypothetical protein	B9J08_000776	B9J08_000776	protein_coding	0	6	0	146
																							hypothetical protein	B9J08_000777	B9J08_000777	protein_coding	0	20	3	152
																							hypothetical protein	B9J08_000778	B9J08_000778	protein_coding	0	2	0	151
																							hypothetical protein	B9J08_000779	B9J08_000779	protein_coding	0	6	1	188
																							hypothetical protein	B9J08_000780	B9J08_000780	protein_coding	0	8	2	153
																							hypothetical protein	B9J08_000781	B9J08_000781	protein_coding	0	17	2	183
																							hypothetical protein	B9J08_000782	B9J08_000782	protein_coding	0	21	13	206
																							hypothetical protein	B9J08_000783	B9J08_000783	protein_coding	1	17	42	183
																							hypothetical protein	B9J08_000784	B9J08_000784	protein_coding	0	11	4	233
																							hypothetical protein	B9J08_000785	B9J08_000785	protein_coding	0	6	1	220
																							hypothetical protein	B9J08_000786	B9J08_000786	protein_coding	0	52	14	205
																							hypothetical protein	B9J08_000787	B9J08_000787	protein_coding	0	13	3	227
																							hypothetical protein	B9J08_000789	B9J08_000789	protein_coding	0	9	4	209
																							hypothetical protein	B9J08_000790	B9J08_000790	protein_coding	0	8	2	203
																							hypothetical protein	B9J08_000791	B9J08_000791	protein_coding	0	6	1	219
																							hypothetical protein	B9J08_000792	B9J08_000792	protein_coding	0	6	1	267
																							hypothetical protein	B9J08_000793	B9J08_000793	protein_coding	0	11	5	259
																							hypothetical protein	B9J08_000794	B9J08_000794	protein_coding	0	12	6	249
																							hypothetical protein	B9J08_000795	B9J08_000795	protein_coding	2	3	2	224
																							hypothetical protein	B9J08_000796	B9J08_000796	protein_coding	0	20	2	202
																							hypothetical protein	B9J08_000797	B9J08_000797	protein_coding	0	14	2	231
																							hypothetical protein	B9J08_000798	B9J08_000798	protein_coding	2	7	4	208
																							hypothetical protein	B9J08_000799	B9J08_000799	protein_coding	0	8	9	239
																							hypothetical protein	B9J08_000801	B9J08_000801	protein_coding	0	0	0	306
																							hypothetical protein	B9J08_000802	B9J08_000802	protein_coding	0	6	0	303
																							hypothetical protein	B9J08_000803	B9J08_000803	protein_coding	0	11	2	303
																							hypothetical protein	B9J08_000804	B9J08_000804	protein_coding	0	10	3	321
																							hypothetical protein	B9J08_000805	B9J08_000805	protein_coding	0	23	13	240
																							hypothetical protein	B9J08_000806	B9J08_000806	protein_coding	0	12	3	238
																							hypothetical protein	B9J08_000807	B9J08_000807	protein_coding	0	3	13	274
																							hypothetical protein	B9J08_000809	B9J08_000809	protein_coding	0	7	1	321
																							hypothetical protein	B9J08_000810	B9J08_000810	protein_coding	0	11	0	300
																							hypothetical protein	B9J08_000811	B9J08_000811	protein_coding	0	23	24	332
																							hypothetical protein	B9J08_000814	B9J08_000814	protein_coding	0	21	8	272
																							hypothetical protein	B9J08_000815	B9J08_000815	protein_coding	0	7	6	237
																							hypothetical protein	B9J08_000817	B9J08_000817	protein_coding	0	5	2	171
																							hypothetical protein	B9J08_000818	B9J08_000818	protein_coding	0	15	3	172
																							hypothetical protein	B9J08_000819	B9J08_000819	protein_coding	0	32	8	163
																							hypothetical protein	B9J08_000820	B9J08_000820	protein_coding	0	5	6	144
																							hypothetical protein	B9J08_000821	B9J08_000821	protein_coding	0	15	3	203
																							hypothetical protein	B9J08_000822	B9J08_000822	protein_coding	0	23	8	306
																							hypothetical protein	B9J08_000824	B9J08_000824	protein_coding	1	8	5	338
																							hypothetical protein	B9J08_000825	B9J08_000825	protein_coding	0	11	4	363
																							hypothetical protein	B9J08_000826	B9J08_000826	protein_coding	1	4	2	325
																							hypothetical protein	B9J08_000827	B9J08_000827	protein_coding	0	20	6	263
																							hypothetical protein	B9J08_000828	B9J08_000828	protein_coding	0	18	6	268
																							hypothetical protein	B9J08_000829	B9J08_000829	protein_coding	0	35	9	288
																							hypothetical protein	B9J08_000830	B9J08_000830	protein_coding	0	10	2	268
																							hypothetical protein	B9J08_000831	B9J08_000831	protein_coding	0	15	1	301
																							hypothetical protein	B9J08_000834	B9J08_000834	protein_coding	0	28	10	203
																							hypothetical protein	B9J08_000835	B9J08_000835	protein_coding	0	5	7	236
																							hypothetical protein	B9J08_000836	B9J08_000836	protein_coding	0	6	1	270
																							hypothetical protein	B9J08_000839	B9J08_000839	protein_coding	2	55	14	243
																							hypothetical protein	B9J08_000840	B9J08_000840	protein_coding	0	5	0	192
																							hypothetical protein	B9J08_000841	B9J08_000841	protein_coding	0	18	10	236
																							hypothetical protein	B9J08_000842	B9J08_000842	protein_coding	0	9	10	183
																							hypothetical protein	B9J08_000843	B9J08_000843	protein_coding	0	15	5	309
																							hypothetical protein	B9J08_000844	B9J08_000844	protein_coding	0	1	2	368
																							hypothetical protein	B9J08_000845	B9J08_000845	protein_coding	0	12	7	430
																							hypothetical protein	B9J08_000846	B9J08_000846	protein_coding	0	7	0	421
																							hypothetical protein	B9J08_000847	B9J08_000847	protein_coding	0	16	0	412
																							hypothetical protein	B9J08_000848	B9J08_000848	protein_coding	0	24	1	284
																							hypothetical protein	B9J08_000849	B9J08_000849	protein_coding	0	3	1	271
																							hypothetical protein	B9J08_000850	B9J08_000850	protein_coding	0	9	7	226
																							hypothetical protein	B9J08_000852	B9J08_000852	protein_coding	0	12	5	255
																							hypothetical protein	B9J08_000853	B9J08_000853	protein_coding	0	29	2	270
																							hypothetical protein	B9J08_000854	B9J08_000854	protein_coding	0	4	1	266
																							hypothetical protein	B9J08_000855	B9J08_000855	protein_coding	0	10	4	294
																							hypothetical protein	B9J08_000856	B9J08_000856	protein_coding	0	7	5	332
																							hypothetical protein	B9J08_000857	B9J08_000857	protein_coding	0	26	13	400
																							hypothetical protein	B9J08_000858	B9J08_000858	protein_coding	0	6	1	368
																							hypothetical protein	B9J08_000859	B9J08_000859	protein_coding	3	24	63	297
																							hypothetical protein	B9J08_000860	B9J08_000860	protein_coding	0	11	2	391
																							hypothetical protein	B9J08_000861	B9J08_000861	protein_coding	0	19	11	374
																							hypothetical protein	B9J08_000862	B9J08_000862	protein_coding	0	10	9	358
																							hypothetical protein	B9J08_000864	B9J08_000864	protein_coding	0	7	3	302
																							hypothetical protein	B9J08_000865	B9J08_000865	protein_coding	0	2	1	306
																							hypothetical protein	B9J08_000866	B9J08_000866	protein_coding	0	12	4	285
																							hypothetical protein	B9J08_000868	B9J08_000868	protein_coding	0	17	23	281
																							hypothetical protein	B9J08_000869	B9J08_000869	protein_coding	0	25	10	272
																							hypothetical protein	B9J08_000870	B9J08_000870	protein_coding	0	9	15	239
																							hypothetical protein	B9J08_000871	B9J08_000871	protein_coding	0	25	4	270
																							hypothetical protein	B9J08_000872	B9J08_000872	protein_coding	0	37	7	293
																							hypothetical protein	B9J08_000874	B9J08_000874	protein_coding	0	21	9	251
																							hypothetical protein	B9J08_000875	B9J08_000875	protein_coding	0	7	7	274
																							hypothetical protein	B9J08_000876	B9J08_000876	protein_coding	0	19	6	353
																							hypothetical protein	B9J08_000877	B9J08_000877	protein_coding	0	10	3	362
																							hypothetical protein	B9J08_000879	B9J08_000879	protein_coding	0	21	13	309
																							hypothetical protein	B9J08_000880	B9J08_000880	protein_coding	0	39	21	426
																							hypothetical protein	B9J08_000881	B9J08_000881	protein_coding	0	22	5	421
																							hypothetical protein	B9J08_000882	B9J08_000882	protein_coding	0	7	0	373
																							hypothetical protein	B9J08_000883	B9J08_000883	protein_coding	0	20	13	370
																							hypothetical protein	B9J08_000884	B9J08_000884	protein_coding	0	5	1	373
																							hypothetical protein	B9J08_000885	B9J08_000885	protein_coding	2	26	16	333
																							hypothetical protein	B9J08_000886	B9J08_000886	protein_coding	0	10	1	383
																							hypothetical protein	B9J08_000887	B9J08_000887	protein_coding	0	50	11	326
																							hypothetical protein	B9J08_000888	B9J08_000888	protein_coding	1	24	17	348
																							hypothetical protein	B9J08_000889	B9J08_000889	protein_coding	0	6	0	389
																							hypothetical protein	B9J08_000890	B9J08_000890	protein_coding	0	5	3	414
																							hypothetical protein	B9J08_000891	B9J08_000891	protein_coding	0	5	5	387
																							hypothetical protein	B9J08_000892	B9J08_000892	protein_coding	2	11	3	368
																							hypothetical protein	B9J08_000894	B9J08_000894	protein_coding	0	10	2	472
																							hypothetical protein	B9J08_000896	B9J08_000896	protein_coding	0	29	4	484
																							hypothetical protein	B9J08_000897	B9J08_000897	protein_coding	0	10	3	461
																							hypothetical protein	B9J08_000898	B9J08_000898	protein_coding	1	24	19	427
																							hypothetical protein	B9J08_000899	B9J08_000899	protein_coding	0	11	0	327
																							hypothetical protein	B9J08_000900	B9J08_000900	protein_coding	0	18	5	299
																							hypothetical protein	B9J08_000901	B9J08_000901	protein_coding	0	16	2	298
																							hypothetical protein	B9J08_000902	B9J08_000902	protein_coding	0	25	13	248
																							hypothetical protein	B9J08_000903	B9J08_000903	protein_coding	0	56	4	212
																							hypothetical protein	B9J08_000904	B9J08_000904	protein_coding	0	42	10	308
																							hypothetical protein	B9J08_000905	B9J08_000905	protein_coding	2	5	6	322
																							hypothetical protein	B9J08_000906	B9J08_000906	protein_coding	1	1	2	286
																							hypothetical protein	B9J08_000907	B9J08_000907	protein_coding	0	31	10	288
																							hypothetical protein	B9J08_000908	B9J08_000908	protein_coding	0	5	1	203
																							hypothetical protein	B9J08_000909	B9J08_000909	protein_coding	0	26	27	154
																							hypothetical protein	B9J08_000910	B9J08_000910	protein_coding	0	17	7	162
																							hypothetical protein	B9J08_000911	B9J08_000911	protein_coding	0	1	3	162
																							hypothetical protein	B9J08_000912	B9J08_000912	protein_coding	0	11	5	213
																							hypothetical protein	B9J08_000913	B9J08_000913	protein_coding	0	3	6	176
																							hypothetical protein	B9J08_000915	B9J08_000915	protein_coding	0	3	1	212
																							hypothetical protein	B9J08_000916	B9J08_000916	protein_coding	0	46	20	240
																							hypothetical protein	B9J08_000917	B9J08_000917	protein_coding	2	12	12	199
																							hypothetical protein	B9J08_000918	B9J08_000918	protein_coding	0	19	5	251
																							hypothetical protein	B9J08_000919	B9J08_000919	protein_coding	0	4	4	304
																							hypothetical protein	B9J08_000920	B9J08_000920	protein_coding	0	9	3	309
																							hypothetical protein	B9J08_000921	B9J08_000921	protein_coding	2	54	77	205
																							hypothetical protein	B9J08_000922	B9J08_000922	protein_coding	0	18	37	235
																							hypothetical protein	B9J08_000923	B9J08_000923	protein_coding	0	9	8	123
																							hypothetical protein	B9J08_000924	B9J08_000924	protein_coding	0	16	3	148
																							hypothetical protein	B9J08_000925	B9J08_000925	protein_coding	0	12	4	195
																							hypothetical protein	B9J08_000926	B9J08_000926	protein_coding	0	66	34	152
																							hypothetical protein	B9J08_000927	B9J08_000927	protein_coding	0	5	6	225
																							hypothetical protein	B9J08_000928	B9J08_000928	protein_coding	0	3	0	177
																							hypothetical protein	B9J08_000929	B9J08_000929	protein_coding	0	28	57	205
																							hypothetical protein	B9J08_000930	B9J08_000930	protein_coding	0	16	3	182
																							hypothetical protein	B9J08_000931	B9J08_000931	protein_coding	0	7	20	186
																							hypothetical protein	B9J08_000932	B9J08_000932	protein_coding	0	13	1	252
																							hypothetical protein	B9J08_000933	B9J08_000933	protein_coding	0	2	2	279
																							hypothetical protein	B9J08_000935	B9J08_000935	protein_coding	0	55	8	233
																							hypothetical protein	B9J08_000936	B9J08_000936	protein_coding	0	31	4	279
																							hypothetical protein	B9J08_000937	B9J08_000937	protein_coding	0	30	5	232
																							hypothetical protein	B9J08_000938	B9J08_000938	protein_coding	0	18	4	260
																							hypothetical protein	B9J08_000939	B9J08_000939	protein_coding	0	52	6	273
																							hypothetical protein	B9J08_000940	B9J08_000940	protein_coding	0	6	2	290
																							hypothetical protein	B9J08_000941	B9J08_000941	protein_coding	0	11	1	285
																							hypothetical protein	B9J08_000942	B9J08_000942	protein_coding	0	10	1	319
																							hypothetical protein	B9J08_000943	B9J08_000943	protein_coding	0	10	13	288
																							hypothetical protein	B9J08_000945	B9J08_000945	protein_coding	0	23	1	184
																							hypothetical protein	B9J08_000946	B9J08_000946	protein_coding	0	8	4	171
																							hypothetical protein	B9J08_000947	B9J08_000947	protein_coding	0	4	3	106
																							hypothetical protein	B9J08_000948	B9J08_000948	protein_coding	0	7	7	116
																							hypothetical protein	B9J08_000949	B9J08_000949	protein_coding	0	4	2	105
																							hypothetical protein	B9J08_000950	B9J08_000950	protein_coding	0	11	4	144
																							hypothetical protein	B9J08_000951	B9J08_000951	protein_coding	0	9	5	182
																							hypothetical protein	B9J08_000952	B9J08_000952	protein_coding	0	1	1	196
																							hypothetical protein	B9J08_000953	B9J08_000953	protein_coding	0	1	3	215
																							hypothetical protein	B9J08_000954	B9J08_000954	protein_coding	0	27	1	255
																							hypothetical protein	B9J08_000957	B9J08_000957	protein_coding	0	6	2	339
																							hypothetical protein	B9J08_000958	B9J08_000958	protein_coding	0	24	37	335
																							hypothetical protein	B9J08_000959	B9J08_000959	protein_coding	0	40	20	299
																							hypothetical protein	B9J08_000960	B9J08_000960	protein_coding	0	9	4	238
																							hypothetical protein	B9J08_000961	B9J08_000961	protein_coding	0	11	4	217
																							hypothetical protein	B9J08_000962	B9J08_000962	protein_coding	0	16	3	157
																							hypothetical protein	B9J08_000963	B9J08_000963	protein_coding	0	10	3	135
																							hypothetical protein	B9J08_000965	B9J08_000965	protein_coding	0	20	1	239
																							hypothetical protein	B9J08_000966	B9J08_000966	protein_coding	0	27	13	315
																							hypothetical protein	B9J08_000967	B9J08_000967	protein_coding	0	17	6	290
																							hypothetical protein	B9J08_000968	B9J08_000968	protein_coding	0	4	4	304
																							hypothetical protein	B9J08_000970	B9J08_000970	protein_coding	2	33	18	243
																							hypothetical protein	B9J08_000971	B9J08_000971	protein_coding	0	19	39	210
																							hypothetical protein	B9J08_000972	B9J08_000972	protein_coding	0	8	2	226
																							hypothetical protein	B9J08_000973	B9J08_000973	protein_coding	0	3	0	247
																							hypothetical protein	B9J08_000974	B9J08_000974	protein_coding	0	15	4	226
																							hypothetical protein	B9J08_000977	B9J08_000977	protein_coding	0	41	16	209
																							hypothetical protein	B9J08_000978	B9J08_000978	protein_coding	0	6	3	159
																							hypothetical protein	B9J08_000979	B9J08_000979	protein_coding	0	8	3	159
																							hypothetical protein	B9J08_000981	B9J08_000981	protein_coding	0	2	1	109
																							hypothetical protein	B9J08_000982	B9J08_000982	protein_coding	0	9	8	187
																							hypothetical protein	B9J08_000983	B9J08_000983	protein_coding	0	1	0	174
																							hypothetical protein	B9J08_000984	B9J08_000984	protein_coding	0	20	10	222
																							hypothetical protein	B9J08_000985	B9J08_000985	protein_coding	0	15	4	151
																							hypothetical protein	B9J08_000986	B9J08_000986	protein_coding	0	4	7	146
																							hypothetical protein	B9J08_000987	B9J08_000987	protein_coding	0	4	0	165
																							hypothetical protein	B9J08_000988	B9J08_000988	protein_coding	0	8	5	179
																							hypothetical protein	B9J08_000989	B9J08_000989	protein_coding	1	19	13	132
																							hypothetical protein	B9J08_000990	B9J08_000990	protein_coding	0	4	4	127
																							hypothetical protein	B9J08_000993	B9J08_000993	protein_coding	0	0	0	111
																							hypothetical protein	B9J08_000994	B9J08_000994	protein_coding	0	12	1	132
																							hypothetical protein	B9J08_000995	B9J08_000995	protein_coding	0	22	1	166
																							hypothetical protein	B9J08_000997	B9J08_000997	protein_coding	0	28	13	146
																							hypothetical protein	B9J08_000999	B9J08_000999	protein_coding	0	11	6	290
																							hypothetical protein	B9J08_001000	B9J08_001000	protein_coding	0	9	3	320
																							hypothetical protein	B9J08_001001	B9J08_001001	protein_coding	0	15	1	299
																							hypothetical protein	B9J08_001002	B9J08_001002	protein_coding	0	12	3	416
																							hypothetical protein	B9J08_001003	B9J08_001003	protein_coding	2	24	29	411
																							hypothetical protein	B9J08_001004	B9J08_001004	protein_coding	0	21	8	296
																							hypothetical protein	B9J08_001006	B9J08_001006	protein_coding	0	21	1	308
																							hypothetical protein	B9J08_001007	B9J08_001007	protein_coding	0	10	2	281
																							hypothetical protein	B9J08_001008	B9J08_001008	protein_coding	0	28	13	302
																							hypothetical protein	B9J08_001009	B9J08_001009	protein_coding	0	9	1	263
																							hypothetical protein	B9J08_001010	B9J08_001010	protein_coding	0	0	0	287
																							hypothetical protein	B9J08_001011	B9J08_001011	protein_coding	0	12	6	366
																							hypothetical protein	B9J08_001012	B9J08_001012	protein_coding	0	26	2	373
																							hypothetical protein	B9J08_001013	B9J08_001013	protein_coding	0	25	10	394
																							hypothetical protein	B9J08_001014	B9J08_001014	protein_coding	0	2	1	397
																							hypothetical protein	B9J08_001015	B9J08_001015	protein_coding	0	22	3	354
																							hypothetical protein	B9J08_001016	B9J08_001016	protein_coding	0	8	7	361
																							hypothetical protein	B9J08_001017	B9J08_001017	protein_coding	2	14	9	356
																							hypothetical protein	B9J08_001018	B9J08_001018	protein_coding	9	117	15	352
																							hypothetical protein	B9J08_001019	B9J08_001019	protein_coding	1	14	12	193
																							hypothetical protein	B9J08_001020	B9J08_001020	protein_coding	0	57	30	254
																							hypothetical protein	B9J08_001021	B9J08_001021	protein_coding	0	8	10	245
																							hypothetical protein	B9J08_001022	B9J08_001022	protein_coding	0	11	9	270
																							hypothetical protein	B9J08_001023	B9J08_001023	protein_coding	0	6	2	285
																							hypothetical protein	B9J08_001024	B9J08_001024	protein_coding	0	57	12	235
																							hypothetical protein	B9J08_001025	B9J08_001025	protein_coding	0	8	1	257
																							hypothetical protein	B9J08_001026	B9J08_001026	protein_coding	0	1	1	192
																							hypothetical protein	B9J08_001027	B9J08_001027	protein_coding	0	8	4	148
																							hypothetical protein	B9J08_001028	B9J08_001028	protein_coding	0	5	3	119
																							hypothetical protein	B9J08_001029	B9J08_001029	protein_coding	0	2	1	125
																							hypothetical protein	B9J08_001030	B9J08_001030	protein_coding	0	19	19	101
																							hypothetical protein	B9J08_001032	B9J08_001032	protein_coding	0	10	1	128
																							hypothetical protein	B9J08_001033	B9J08_001033	protein_coding	0	7	2	135
																							hypothetical protein	B9J08_001034	B9J08_001034	protein_coding	0	15	7	127
																							hypothetical protein	B9J08_001035	B9J08_001035	protein_coding	0	1	1	160
																							hypothetical protein	B9J08_001036	B9J08_001036	protein_coding	0	14	2	209
																							hypothetical protein	B9J08_001037	B9J08_001037	protein_coding	0	3	0	219
																							hypothetical protein	B9J08_001038	B9J08_001038	protein_coding	0	27	14	194
																							hypothetical protein	B9J08_001040	B9J08_001040	protein_coding	0	7	1	185
																							hypothetical protein	B9J08_001041	B9J08_001041	protein_coding	0	8	2	191
																							hypothetical protein	B9J08_001042	B9J08_001042	protein_coding	0	9	14	147
																							hypothetical protein	B9J08_001043	B9J08_001043	protein_coding	0	13	5	139
																							hypothetical protein	B9J08_001044	B9J08_001044	protein_coding	0	5	0	155
																							hypothetical protein	B9J08_001048	B9J08_001048	protein_coding	0	54	51	246
																							hypothetical protein	B9J08_001050	B9J08_001050	protein_coding	0	7	13	333
																							hypothetical protein	B9J08_001051	B9J08_001051	protein_coding	3	28	22	386
																							hypothetical protein	B9J08_001052	B9J08_001052	protein_coding	1	22	35	462
																							hypothetical protein	B9J08_001053	B9J08_001053	protein_coding	1	8	28	455
																							hypothetical protein	B9J08_001054	B9J08_001054	protein_coding	0	1	8	632
																							hypothetical protein	B9J08_001062	B9J08_001062	protein_coding	0	13	8	146
																							hypothetical protein	B9J08_001063	B9J08_001063	protein_coding	0	21	5	161
																							hypothetical protein	B9J08_001064	B9J08_001064	protein_coding	0	19	5	168
																							hypothetical protein	B9J08_001065	B9J08_001065	protein_coding	0	19	14	172
																							hypothetical protein	B9J08_001066	B9J08_001066	protein_coding	0	12	9	234
																							hypothetical protein	B9J08_001067	B9J08_001067	protein_coding	0	12	1	132
																							hypothetical protein	B9J08_001068	B9J08_001068	protein_coding	0	10	0	137
																							hypothetical protein	B9J08_001069	B9J08_001069	protein_coding	0	3	2	144
																							hypothetical protein	B9J08_001070	B9J08_001070	protein_coding	0	2	4	117
																							hypothetical protein	B9J08_001071	B9J08_001071	protein_coding	0	13	5	94
																							hypothetical protein	B9J08_001072	B9J08_001072	protein_coding	0	0	0	99
																							hypothetical protein	B9J08_001074	B9J08_001074	protein_coding	0	2	1	114
																							hypothetical protein	B9J08_001075	B9J08_001075	protein_coding	0	54	38	74
																							hypothetical protein	B9J08_001076	B9J08_001076	protein_coding	0	4	7	71
																							hypothetical protein	B9J08_001077	B9J08_001077	protein_coding	0	5	1	94
																							hypothetical protein	B9J08_001078	B9J08_001078	protein_coding	0	2	1	115
																							hypothetical protein	B9J08_001079	B9J08_001079	protein_coding	0	11	4	123
																							hypothetical protein	B9J08_001080	B9J08_001080	protein_coding	0	4	1	142
																							hypothetical protein	B9J08_001082	B9J08_001082	protein_coding	1	10	2	166
																							hypothetical protein	B9J08_001083	B9J08_001083	protein_coding	0	0	3	132
																							hypothetical protein	B9J08_001084	B9J08_001084	protein_coding	0	10	1	132
																							hypothetical protein	B9J08_001087	B9J08_001087	protein_coding	0	14	7	121
																							hypothetical protein	B9J08_001088	B9J08_001088	protein_coding	0	1	2	120
																							hypothetical protein	B9J08_001089	B9J08_001089	protein_coding	0	1	2	117
																							hypothetical protein	B9J08_001091	B9J08_001091	protein_coding	0	3	1	99
																							hypothetical protein	B9J08_001092	B9J08_001092	protein_coding	0	5	8	89
																							hypothetical protein	B9J08_001093	B9J08_001093	protein_coding	0	9	8	105
																							hypothetical protein	B9J08_001094	B9J08_001094	protein_coding	0	3	2	126
																							hypothetical protein	B9J08_001096	B9J08_001096	protein_coding	0	22	7	145
																							hypothetical protein	B9J08_001100	B9J08_001100	protein_coding	0	8	8	153
																							hypothetical protein	B9J08_001101	B9J08_001101	protein_coding	0	25	8	203
																							hypothetical protein	B9J08_001102	B9J08_001102	protein_coding	0	2	0	185
																							hypothetical protein	B9J08_001103	B9J08_001103	protein_coding	0	16	2	147
																							hypothetical protein	B9J08_001104	B9J08_001104	protein_coding	0	2	2	149
																							hypothetical protein	B9J08_001105	B9J08_001105	protein_coding	0	13	2	145
																							hypothetical protein	B9J08_001106	B9J08_001106	protein_coding	0	4	3	96
																							hypothetical protein	B9J08_001107	B9J08_001107	protein_coding	0	11	6	111
																							hypothetical protein	B9J08_001109	B9J08_001109	protein_coding	1	9	12	120
																							hypothetical protein	B9J08_001110	B9J08_001110	protein_coding	0	11	0	96
																							hypothetical protein	B9J08_001111	B9J08_001111	protein_coding	0	8	1	123
																							hypothetical protein	B9J08_001112	B9J08_001112	protein_coding	0	7	0	147
																							hypothetical protein	B9J08_001113	B9J08_001113	protein_coding	0	7	2	187
																							hypothetical protein	B9J08_001114	B9J08_001114	protein_coding	0	6	6	186
																							hypothetical protein	B9J08_001115	B9J08_001115	protein_coding	0	22	18	200
																							hypothetical protein	B9J08_001116	B9J08_001116	protein_coding	0	17	12	211
																							hypothetical protein	B9J08_001117	B9J08_001117	protein_coding	0	12	6	220
																							hypothetical protein	B9J08_001118	B9J08_001118	protein_coding	0	5	9	231
																							hypothetical protein	B9J08_001119	B9J08_001119	protein_coding	2	28	28	213
																							hypothetical protein	B9J08_001120	B9J08_001120	protein_coding	0	14	2	217
																							hypothetical protein	B9J08_001121	B9J08_001121	protein_coding	0	11	8	159
																							hypothetical protein	B9J08_001123	B9J08_001123	protein_coding	0	5	3	157
																							hypothetical protein	B9J08_001124	B9J08_001124	protein_coding	0	12	7	116
																							hypothetical protein	B9J08_001125	B9J08_001125	protein_coding	0	25	7	186
																							hypothetical protein	B9J08_001126	B9J08_001126	protein_coding	0	8	8	122
																							hypothetical protein	B9J08_001127	B9J08_001127	protein_coding	0	4	4	131
																							hypothetical protein	B9J08_001128	B9J08_001128	protein_coding	0	0	1	138
																							hypothetical protein	B9J08_001129	B9J08_001129	protein_coding	0	4	6	130
																							hypothetical protein	B9J08_001130	B9J08_001130	protein_coding	0	12	12	138
																							hypothetical protein	B9J08_001131	B9J08_001131	protein_coding	0	15	11	147
																							hypothetical protein	B9J08_001132	B9J08_001132	protein_coding	0	25	16	152
																							hypothetical protein	B9J08_001133	B9J08_001133	protein_coding	0	2	5	177
																							hypothetical protein	B9J08_001134	B9J08_001134	protein_coding	0	2	0	175
																							hypothetical protein	B9J08_001137	B9J08_001137	protein_coding	0	7	0	133
																							hypothetical protein	B9J08_001138	B9J08_001138	protein_coding	0	63	9	124
																							hypothetical protein	B9J08_001140	B9J08_001140	protein_coding	0	7	6	92
																							hypothetical protein	B9J08_001141	B9J08_001141	protein_coding	0	18	7	102
																							hypothetical protein	B9J08_001142	B9J08_001142	protein_coding	0	20	1	94
																							hypothetical protein	B9J08_001144	B9J08_001144	protein_coding	0	1	4	141
																							hypothetical protein	B9J08_001145	B9J08_001145	protein_coding	0	1	2	140
																							hypothetical protein	B9J08_001146	B9J08_001146	protein_coding	0	10	5	121
																							hypothetical protein	B9J08_001147	B9J08_001147	protein_coding	0	2	2	110
																							hypothetical protein	B9J08_001148	B9J08_001148	protein_coding	0	6	0	104
																							hypothetical protein	B9J08_001149	B9J08_001149	protein_coding	0	14	13	146
																							hypothetical protein	B9J08_001151	B9J08_001151	protein_coding	0	13	6	134
																							hypothetical protein	B9J08_001152	B9J08_001152	protein_coding	0	14	11	157
																							hypothetical protein	B9J08_001153	B9J08_001153	protein_coding	0	5	0	167
																							hypothetical protein	B9J08_001155	B9J08_001155	protein_coding	1	18	32	166
																							hypothetical protein	B9J08_001157	B9J08_001157	protein_coding	0	7	3	177
																							hypothetical protein	B9J08_001158	B9J08_001158	protein_coding	0	6	1	177
																							hypothetical protein	B9J08_001159	B9J08_001159	protein_coding	1	2	8	172
																							hypothetical protein	B9J08_001160	B9J08_001160	protein_coding	0	12	10	140
																							hypothetical protein	B9J08_001161	B9J08_001161	protein_coding	0	20	4	153
																							hypothetical protein	B9J08_001162	B9J08_001162	protein_coding	0	12	5	185
																							hypothetical protein	B9J08_001163	B9J08_001163	protein_coding	0	14	13	160
																							hypothetical protein	B9J08_001164	B9J08_001164	protein_coding	0	8	7	172
																							hypothetical protein	B9J08_001165	B9J08_001165	protein_coding	0	11	10	189
																							hypothetical protein	B9J08_001166	B9J08_001166	protein_coding	0	8	9	169
																							hypothetical protein	B9J08_001167	B9J08_001167	protein_coding	0	4	2	168
																							hypothetical protein	B9J08_001168	B9J08_001168	protein_coding	0	16	12	185
																							hypothetical protein	B9J08_001169	B9J08_001169	protein_coding	0	2	3	150
																							hypothetical protein	B9J08_001171	B9J08_001171	protein_coding	0	3	3	125
																							hypothetical protein	B9J08_001172	B9J08_001172	protein_coding	0	19	15	121
																							hypothetical protein	B9J08_001173	B9J08_001173	protein_coding	0	3	4	100
																							hypothetical protein	B9J08_001174	B9J08_001174	protein_coding	0	2	2	89
																							hypothetical protein	B9J08_001175	B9J08_001175	protein_coding	0	14	4	116
																							hypothetical protein	B9J08_001177	B9J08_001177	protein_coding	0	5	0	131
																							hypothetical protein	B9J08_001178	B9J08_001178	protein_coding	0	0	0	133
																							hypothetical protein	B9J08_001179	B9J08_001179	protein_coding	0	7	3	128
																							hypothetical protein	B9J08_001180	B9J08_001180	protein_coding	0	16	12	126
																							hypothetical protein	B9J08_001181	B9J08_001181	protein_coding	0	6	2	153
																							hypothetical protein	B9J08_001182	B9J08_001182	protein_coding	0	18	10	120
																							hypothetical protein	B9J08_001183	B9J08_001183	protein_coding	0	9	1	106
																							hypothetical protein	B9J08_001184	B9J08_001184	protein_coding	0	1	2	123
																							hypothetical protein	B9J08_001185	B9J08_001185	protein_coding	0	4	8	115
																							hypothetical protein	B9J08_001186	B9J08_001186	protein_coding	0	16	3	94
																							hypothetical protein	B9J08_001187	B9J08_001187	protein_coding	0	5	1	96
																							hypothetical protein	B9J08_001188	B9J08_001188	protein_coding	0	6	5	116
																							hypothetical protein	B9J08_001189	B9J08_001189	protein_coding	0	9	7	101
																							hypothetical protein	B9J08_001190	B9J08_001190	protein_coding	0	6	1	84
																							hypothetical protein	B9J08_001191	B9J08_001191	protein_coding	0	6	2	83
																							hypothetical protein	B9J08_001192	B9J08_001192	protein_coding	0	34	5	199
																							hypothetical protein	B9J08_001193	B9J08_001193	protein_coding	0	9	5	205
																							hypothetical protein	B9J08_001194	B9J08_001194	protein_coding	0	15	10	194
																							hypothetical protein	B9J08_001195	B9J08_001195	protein_coding	0	15	11	219
																							hypothetical protein	B9J08_001196	B9J08_001196	protein_coding	2	4	1	163
																							hypothetical protein	B9J08_001197	B9J08_001197	protein_coding	0	10	19	143
																							hypothetical protein	B9J08_001198	B9J08_001198	protein_coding	1	4	5	147
																							hypothetical protein	B9J08_001199	B9J08_001199	protein_coding	0	1	4	132
																							hypothetical protein	B9J08_001200	B9J08_001200	protein_coding	0	0	1	124
																							hypothetical protein	B9J08_001201	B9J08_001201	protein_coding	0	4	5	125
																							hypothetical protein	B9J08_001202	B9J08_001202	protein_coding	0	0	1	144
																							hypothetical protein	B9J08_001203	B9J08_001203	protein_coding	0	5	1	131
																							hypothetical protein	B9J08_001204	B9J08_001204	protein_coding	0	6	3	126
																							hypothetical protein	B9J08_001206	B9J08_001206	protein_coding	1	3	4	92
																							hypothetical protein	B9J08_001208	B9J08_001208	protein_coding	0	8	4	96
																							hypothetical protein	B9J08_001209	B9J08_001209	protein_coding	0	15	10	69
																							hypothetical protein	B9J08_001210	B9J08_001210	protein_coding	0	5	0	74
																							hypothetical protein	B9J08_001211	B9J08_001211	protein_coding	0	21	17	101
																							hypothetical protein	B9J08_001213	B9J08_001213	protein_coding	0	8	6	83
																							hypothetical protein	B9J08_001214	B9J08_001214	protein_coding	0	8	8	83
																							hypothetical protein	B9J08_001215	B9J08_001215	protein_coding	0	7	10	101
																							hypothetical protein	B9J08_001216	B9J08_001216	protein_coding	0	5	5	130
																							hypothetical protein	B9J08_001217	B9J08_001217	protein_coding	0	7	2	135
																							hypothetical protein	B9J08_001218	B9J08_001218	protein_coding	0	3	3	136
																							hypothetical protein	B9J08_001219	B9J08_001219	protein_coding	0	6	3	142
																							hypothetical protein	B9J08_001220	B9J08_001220	protein_coding	0	4	5	154
																							hypothetical protein	B9J08_001221	B9J08_001221	protein_coding	0	4	6	158
																							hypothetical protein	B9J08_001222	B9J08_001222	protein_coding	0	10	1	152
																							hypothetical protein	B9J08_001223	B9J08_001223	protein_coding	0	4	0	131
																							hypothetical protein	B9J08_001224	B9J08_001224	protein_coding	0	32	9	119
																							hypothetical protein	B9J08_001225	B9J08_001225	protein_coding	0	7	4	175
																							hypothetical protein	B9J08_001226	B9J08_001226	protein_coding	0	1	3	161
																							hypothetical protein	B9J08_001228	B9J08_001228	protein_coding	0	16	2	168
																							hypothetical protein	B9J08_001229	B9J08_001229	protein_coding	0	2	2	177
																							hypothetical protein	B9J08_001230	B9J08_001230	protein_coding	0	10	3	201
																							hypothetical protein	B9J08_001231	B9J08_001231	protein_coding	0	3	1	179
																							hypothetical protein	B9J08_001232	B9J08_001232	protein_coding	0	6	5	195
																							hypothetical protein	B9J08_001234	B9J08_001234	protein_coding	0	1	1	234
																							hypothetical protein	B9J08_001235	B9J08_001235	protein_coding	0	10	4	269
																							hypothetical protein	B9J08_001236	B9J08_001236	protein_coding	0	31	14	227
																							hypothetical protein	B9J08_001237	B9J08_001237	protein_coding	0	2	1	205
																							hypothetical protein	B9J08_001239	B9J08_001239	protein_coding	0	11	5	254
																							hypothetical protein	B9J08_001240	B9J08_001240	protein_coding	0	1	0	191
																							hypothetical protein	B9J08_001241	B9J08_001241	protein_coding	0	23	5	189
																							hypothetical protein	B9J08_001242	B9J08_001242	protein_coding	0	0	1	231
																							hypothetical protein	B9J08_001244	B9J08_001244	protein_coding	0	5	1	224
																							hypothetical protein	B9J08_001245	B9J08_001245	protein_coding	0	22	12	303
																							hypothetical protein	B9J08_001246	B9J08_001246	protein_coding	0	4	1	256
																							hypothetical protein	B9J08_001247	B9J08_001247	protein_coding	0	23	11	265
																							hypothetical protein	B9J08_001248	B9J08_001248	protein_coding	0	21	8	211
																							hypothetical protein	B9J08_001249	B9J08_001249	protein_coding	0	5	2	233
																							hypothetical protein	B9J08_001251	B9J08_001251	protein_coding	0	2	3	200
																							hypothetical protein	B9J08_001252	B9J08_001252	protein_coding	0	2	0	193
																							hypothetical protein	B9J08_001253	B9J08_001253	protein_coding	0	8	0	177
																							hypothetical protein	B9J08_001257	B9J08_001257	protein_coding	0	3	5	100
																							hypothetical protein	B9J08_001259	B9J08_001259	protein_coding	0	22	11	108
																							hypothetical protein	B9J08_001260	B9J08_001260	protein_coding	0	12	12	169
																							hypothetical protein	B9J08_001261	B9J08_001261	protein_coding	0	14	5	185
																							hypothetical protein	B9J08_001262	B9J08_001262	protein_coding	0	9	1	191
																							hypothetical protein	B9J08_001263	B9J08_001263	protein_coding	0	11	4	186
																							hypothetical protein	B9J08_001265	B9J08_001265	protein_coding	0	29	5	228
																							hypothetical protein	B9J08_001267	B9J08_001267	protein_coding	0	1	4	279
																							hypothetical protein	B9J08_001268	B9J08_001268	protein_coding	0	8	7	260
																							hypothetical protein	B9J08_001269	B9J08_001269	protein_coding	0	7	7	232
																							hypothetical protein	B9J08_001270	B9J08_001270	protein_coding	0	14	13	207
																							hypothetical protein	B9J08_001272	B9J08_001272	protein_coding	0	2	1	238
																							hypothetical protein	B9J08_001273	B9J08_001273	protein_coding	0	20	7	205
																							hypothetical protein	B9J08_001274	B9J08_001274	protein_coding	0	23	7	203
																							hypothetical protein	B9J08_001275	B9J08_001275	protein_coding	0	24	9	258
																							hypothetical protein	B9J08_001276	B9J08_001276	protein_coding	0	7	7	345
																							hypothetical protein	B9J08_001279	B9J08_001279	protein_coding	0	15	9	242
																							hypothetical protein	B9J08_001280	B9J08_001280	protein_coding	0	14	2	235
																							hypothetical protein	B9J08_001282	B9J08_001282	protein_coding	0	2	3	132
																							hypothetical protein	B9J08_001283	B9J08_001283	protein_coding	0	2	3	177
																							hypothetical protein	B9J08_001284	B9J08_001284	protein_coding	0	10	2	192
																							hypothetical protein	B9J08_001285	B9J08_001285	protein_coding	0	19	5	250
																							hypothetical protein	B9J08_001286	B9J08_001286	protein_coding	0	31	7	300
																							hypothetical protein	B9J08_001287	B9J08_001287	protein_coding	5	3	15	256
																							hypothetical protein	B9J08_001288	B9J08_001288	protein_coding	0	15	1	286
																							hypothetical protein	B9J08_001289	B9J08_001289	protein_coding	0	12	7	303
																							hypothetical protein	B9J08_001290	B9J08_001290	protein_coding	0	29	11	276
																							hypothetical protein	B9J08_001291	B9J08_001291	protein_coding	2	20	4	228
																							hypothetical protein	B9J08_001292	B9J08_001292	protein_coding	0	4	1	210
																							hypothetical protein	B9J08_001294	B9J08_001294	protein_coding	0	16	2	202
																							hypothetical protein	B9J08_001295	B9J08_001295	protein_coding	0	7	0	204
																							hypothetical protein	B9J08_001297	B9J08_001297	protein_coding	0	59	2	212
																							hypothetical protein	B9J08_001298	B9J08_001298	protein_coding	0	19	2	271
																							hypothetical protein	B9J08_001299	B9J08_001299	protein_coding	0	7	3	266
																							hypothetical protein	B9J08_001300	B9J08_001300	protein_coding	0	26	3	246
																							hypothetical protein	B9J08_001301	B9J08_001301	protein_coding	0	17	14	228
																							hypothetical protein	B9J08_001302	B9J08_001302	protein_coding	0	5	12	153
																							hypothetical protein	B9J08_001303	B9J08_001303	protein_coding	0	11	3	116
																							hypothetical protein	B9J08_001304	B9J08_001304	protein_coding	0	7	2	112
																							hypothetical protein	B9J08_001305	B9J08_001305	protein_coding	0	18	17	100
																							hypothetical protein	B9J08_001306	B9J08_001306	protein_coding	0	3	5	90
																							hypothetical protein	B9J08_001307	B9J08_001307	protein_coding	0	40	27	126
																							hypothetical protein	B9J08_001308	B9J08_001308	protein_coding	0	5	3	137
																							hypothetical protein	B9J08_001309	B9J08_001309	protein_coding	0	8	2	150
																							hypothetical protein	B9J08_001312	B9J08_001312	protein_coding	0	8	1	175
																							hypothetical protein	B9J08_001313	B9J08_001313	protein_coding	1	3	1	174
																							hypothetical protein	B9J08_001314	B9J08_001314	protein_coding	0	12	2	219
																							hypothetical protein	B9J08_001316	B9J08_001316	protein_coding	0	16	20	231
																							hypothetical protein	B9J08_001317	B9J08_001317	protein_coding	0	2	0	306
																							hypothetical protein	B9J08_001318	B9J08_001318	protein_coding	0	10	2	292
																							hypothetical protein	B9J08_001319	B9J08_001319	protein_coding	0	21	3	359
																							hypothetical protein	B9J08_001320	B9J08_001320	protein_coding	0	13	5	356
																							hypothetical protein	B9J08_001321	B9J08_001321	protein_coding	0	21	17	285
																							hypothetical protein	B9J08_001322	B9J08_001322	protein_coding	0	5	1	223
																							hypothetical protein	B9J08_001323	B9J08_001323	protein_coding	0	4	2	276
																							hypothetical protein	B9J08_001324	B9J08_001324	protein_coding	0	15	1	371
																							hypothetical protein	B9J08_001325	B9J08_001325	protein_coding	0	11	1	281
																							hypothetical protein	B9J08_001328	B9J08_001328	protein_coding	0	6	6	358
																							hypothetical protein	B9J08_001329	B9J08_001329	protein_coding	1	6	0	360
																							hypothetical protein	B9J08_001331	B9J08_001331	protein_coding	0	22	14	334
																							hypothetical protein	B9J08_001332	B9J08_001332	protein_coding	0	11	7	532
																							hypothetical protein	B9J08_001335	B9J08_001335	protein_coding	0	16	7	482
																							hypothetical protein	B9J08_001336	B9J08_001336	protein_coding	0	6	4	456
																							hypothetical protein	B9J08_001339	B9J08_001339	protein_coding	0	10	7	332
																							hypothetical protein	B9J08_001341	B9J08_001341	protein_coding	0	20	21	316
																							hypothetical protein	B9J08_001342	B9J08_001342	protein_coding	0	24	22	355
																							hypothetical protein	B9J08_001344	B9J08_001344	protein_coding	0	8	0	343
																							hypothetical protein	B9J08_001345	B9J08_001345	protein_coding	0	9	1	299
																							hypothetical protein	B9J08_001346	B9J08_001346	protein_coding	0	11	4	365
																							hypothetical protein	B9J08_001347	B9J08_001347	protein_coding	0	22	10	340
																							hypothetical protein	B9J08_001348	B9J08_001348	protein_coding	0	8	0	330
																							hypothetical protein	B9J08_001349	B9J08_001349	protein_coding	0	15	4	300
																							hypothetical protein	B9J08_001350	B9J08_001350	protein_coding	0	27	14	276
																							hypothetical protein	B9J08_001351	B9J08_001351	protein_coding	0	7	1	221
																							hypothetical protein	B9J08_001352	B9J08_001352	protein_coding	0	13	0	235
																							hypothetical protein	B9J08_001353	B9J08_001353	protein_coding	0	4	0	239
																							hypothetical protein	B9J08_001355	B9J08_001355	protein_coding	0	18	8	216
																							hypothetical protein	B9J08_001356	B9J08_001356	protein_coding	1	8	3	193
																							hypothetical protein	B9J08_001357	B9J08_001357	protein_coding	0	14	14	214
																							hypothetical protein	B9J08_001359	B9J08_001359	protein_coding	0	27	17	256
																							hypothetical protein	B9J08_001360	B9J08_001360	protein_coding	0	1	2	283
																							hypothetical protein	B9J08_001361	B9J08_001361	protein_coding	2	9	16	302
																							hypothetical protein	B9J08_001362	B9J08_001362	protein_coding	0	22	4	317
																							hypothetical protein	B9J08_001364	B9J08_001364	protein_coding	0	31	15	291
																							hypothetical protein	B9J08_001365	B9J08_001365	protein_coding	0	15	1	292
																							hypothetical protein	B9J08_001366	B9J08_001366	protein_coding	0	13	0	308
																							hypothetical protein	B9J08_001367	B9J08_001367	protein_coding	0	27	9	338
																							hypothetical protein	B9J08_001369	B9J08_001369	protein_coding	0	49	54	342
																							hypothetical protein	B9J08_001370	B9J08_001370	protein_coding	4	30	58	290
																							hypothetical protein	B9J08_001371	B9J08_001371	protein_coding	1	24	8	413
																							hypothetical protein	B9J08_001372	B9J08_001372	protein_coding	2	14	13	199
																							hypothetical protein	B9J08_001373	B9J08_001373	protein_coding	0	12	6	240
																							hypothetical protein	B9J08_001374	B9J08_001374	protein_coding	0	20	2	199
																							hypothetical protein	B9J08_001375	B9J08_001375	protein_coding	0	7	1	205
																							hypothetical protein	B9J08_001376	B9J08_001376	protein_coding	0	55	13	192
																							hypothetical protein	B9J08_001377	B9J08_001377	protein_coding	0	6	0	163
																							hypothetical protein	B9J08_001378	B9J08_001378	protein_coding	0	14	5	165
																							hypothetical protein	B9J08_001379	B9J08_001379	protein_coding	0	0	5	162
																							hypothetical protein	B9J08_001380	B9J08_001380	protein_coding	1	4	2	181
																							hypothetical protein	B9J08_001382	B9J08_001382	protein_coding	0	2	0	138
																							hypothetical protein	B9J08_001383	B9J08_001383	protein_coding	0	9	7	158
																							hypothetical protein	B9J08_001385	B9J08_001385	protein_coding	0	7	4	80
																							hypothetical protein	B9J08_001386	B9J08_001386	protein_coding	0	4	0	81
																							hypothetical protein	B9J08_001388	B9J08_001388	protein_coding	0	7	1	111
																							hypothetical protein	B9J08_001390	B9J08_001390	protein_coding	0	4	2	88
																							hypothetical protein	B9J08_001391	B9J08_001391	protein_coding	0	11	3	104
																							hypothetical protein	B9J08_001393	B9J08_001393	protein_coding	0	2	2	87
																							hypothetical protein	B9J08_001394	B9J08_001394	protein_coding	0	1	2	101
																							hypothetical protein	B9J08_001396	B9J08_001396	protein_coding	0	2	2	134
																							hypothetical protein	B9J08_001397	B9J08_001397	protein_coding	0	4	6	157
																							hypothetical protein	B9J08_001398	B9J08_001398	protein_coding	0	2	0	171
																							hypothetical protein	B9J08_001399	B9J08_001399	protein_coding	0	9	3	192
																							hypothetical protein	B9J08_001400	B9J08_001400	protein_coding	0	23	9	198
																							hypothetical protein	B9J08_001401	B9J08_001401	protein_coding	0	13	7	209
																							hypothetical protein	B9J08_001402	B9J08_001402	protein_coding	0	24	15	206
																							hypothetical protein	B9J08_001403	B9J08_001403	protein_coding	0	4	2	193
																							hypothetical protein	B9J08_001404	B9J08_001404	protein_coding	0	23	8	208
																							hypothetical protein	B9J08_001405	B9J08_001405	protein_coding	0	12	2	205
																							hypothetical protein	B9J08_001407	B9J08_001407	protein_coding	0	3	1	198
																							hypothetical protein	B9J08_001408	B9J08_001408	protein_coding	0	3	6	188
																							hypothetical protein	B9J08_001409	B9J08_001409	protein_coding	0	12	7	196
																							hypothetical protein	B9J08_001410	B9J08_001410	protein_coding	0	34	15	241
																							hypothetical protein	B9J08_001411	B9J08_001411	protein_coding	0	4	2	218
																							hypothetical protein	B9J08_001412	B9J08_001412	protein_coding	0	18	26	190
																							hypothetical protein	B9J08_001414	B9J08_001414	protein_coding	0	42	30	176
																							hypothetical protein	B9J08_001415	B9J08_001415	protein_coding	0	33	24	209
																							hypothetical protein	B9J08_001416	B9J08_001416	protein_coding	0	18	17	194
																							hypothetical protein	B9J08_001417	B9J08_001417	protein_coding	0	11	4	250
																							hypothetical protein	B9J08_001418	B9J08_001418	protein_coding	0	7	2	241
																							hypothetical protein	B9J08_001419	B9J08_001419	protein_coding	0	4	10	226
																							hypothetical protein	B9J08_001420	B9J08_001420	protein_coding	0	22	8	201
																							hypothetical protein	B9J08_001423	B9J08_001423	protein_coding	1	15	11	211
																							hypothetical protein	B9J08_001424	B9J08_001424	protein_coding	0	16	22	312
																							hypothetical protein	B9J08_001425	B9J08_001425	protein_coding	0	10	2	340
																							hypothetical protein	B9J08_001426	B9J08_001426	protein_coding	0	4	3	339
																							hypothetical protein	B9J08_001427	B9J08_001427	protein_coding	0	31	7	381
																							hypothetical protein	B9J08_001428	B9J08_001428	protein_coding	0	9	0	320
																							hypothetical protein	B9J08_001431	B9J08_001431	protein_coding	0	18	27	239
																							hypothetical protein	B9J08_001433	B9J08_001433	protein_coding	0	3	1	173
																							hypothetical protein	B9J08_001434	B9J08_001434	protein_coding	0	4	4	163
																							hypothetical protein	B9J08_001435	B9J08_001435	protein_coding	0	9	19	144
																							hypothetical protein	B9J08_001436	B9J08_001436	protein_coding	0	8	15	157
																							hypothetical protein	B9J08_001437	B9J08_001437	protein_coding	1	2	5	153
																							hypothetical protein	B9J08_001438	B9J08_001438	protein_coding	0	2	1	171
																							hypothetical protein	B9J08_001439	B9J08_001439	protein_coding	1	3	0	181
																							hypothetical protein	B9J08_001440	B9J08_001440	protein_coding	0	8	9	202
																							hypothetical protein	B9J08_001441	B9J08_001441	protein_coding	1	3	2	238
																							hypothetical protein	B9J08_001442	B9J08_001442	protein_coding	0	31	6	250
																							hypothetical protein	B9J08_001443	B9J08_001443	protein_coding	0	57	11	215
																							hypothetical protein	B9J08_001444	B9J08_001444	protein_coding	0	5	0	166
																							hypothetical protein	B9J08_001445	B9J08_001445	protein_coding	0	13	5	179
																							hypothetical protein	B9J08_001446	B9J08_001446	protein_coding	0	8	1	170
																							hypothetical protein	B9J08_001449	B9J08_001449	protein_coding	0	3	0	184
																							hypothetical protein	B9J08_001450	B9J08_001450	protein_coding	0	15	12	235
																							hypothetical protein	B9J08_001451	B9J08_001451	protein_coding	2	17	11	198
																							hypothetical protein	B9J08_001452	B9J08_001452	protein_coding	0	25	4	161
																							hypothetical protein	B9J08_001454	B9J08_001454	protein_coding	0	0	0	167
																							hypothetical protein	B9J08_001455	B9J08_001455	protein_coding	2	19	11	139
																							hypothetical protein	B9J08_001456	B9J08_001456	protein_coding	0	13	18	288
																							hypothetical protein	B9J08_001457	B9J08_001457	protein_coding	0	36	9	404
																							hypothetical protein	B9J08_001458	B9J08_001458	protein_coding	3	40	17	443
																							hypothetical protein	B9J08_001459	B9J08_001459	protein_coding	0	12	12	298
																							hypothetical protein	B9J08_001460	B9J08_001460	protein_coding	0	6	0	266
																							hypothetical protein	B9J08_001462	B9J08_001462	protein_coding	0	4	1	308
																							hypothetical protein	B9J08_001463	B9J08_001463	protein_coding	0	58	19	286
																							hypothetical protein	B9J08_001465	B9J08_001465	protein_coding	0	19	2	410
																							hypothetical protein	B9J08_001466	B9J08_001466	protein_coding	1	16	41	427
																							hypothetical protein	B9J08_001468	B9J08_001468	protein_coding	5	43	54	485
																							hypothetical protein	B9J08_001469	B9J08_001469	protein_coding	0	22	21	585
																							hypothetical protein	B9J08_001470	B9J08_001470	protein_coding	0	30	13	396
																							hypothetical protein	B9J08_001472	B9J08_001472	protein_coding	0	4	1	366
																							hypothetical protein	B9J08_001473	B9J08_001473	protein_coding	0	21	3	379
																							hypothetical protein	B9J08_001474	B9J08_001474	protein_coding	1	30	9	325
																							hypothetical protein	B9J08_001475	B9J08_001475	protein_coding	0	55	6	309
																							hypothetical protein	B9J08_001476	B9J08_001476	protein_coding	0	51	16	321
																							hypothetical protein	B9J08_001477	B9J08_001477	protein_coding	0	9	0	286
																							hypothetical protein	B9J08_001479	B9J08_001479	protein_coding	5	17	40	244
																							hypothetical protein	B9J08_001480	B9J08_001480	protein_coding	1	6	20	352
																							hypothetical protein	B9J08_001481	B9J08_001481	protein_coding	1	0	6	377
																							hypothetical protein	B9J08_001482	B9J08_001482	protein_coding	0	0	2	412
																							hypothetical protein	B9J08_001483	B9J08_001483	protein_coding	0	30	7	477
																							hypothetical protein	B9J08_001485	B9J08_001485	protein_coding	0	7	1	309
																							hypothetical protein	B9J08_001486	B9J08_001486	protein_coding	0	22	12	328
																							hypothetical protein	B9J08_001487	B9J08_001487	protein_coding	0	21	9	379
																							hypothetical protein	B9J08_001489	B9J08_001489	protein_coding	0	17	2	370
																							hypothetical protein	B9J08_001490	B9J08_001490	protein_coding	0	19	42	317
																							hypothetical protein	B9J08_001491	B9J08_001491	protein_coding	0	20	11	267
																							hypothetical protein	B9J08_001492	B9J08_001492	protein_coding	2	51	17	253
																							hypothetical protein	B9J08_001493	B9J08_001493	protein_coding	0	39	4	286
																							hypothetical protein	B9J08_001494	B9J08_001494	protein_coding	3	14	8	322
																							hypothetical protein	B9J08_001495	B9J08_001495	protein_coding	0	9	0	305
																							hypothetical protein	B9J08_001496	B9J08_001496	protein_coding	1	48	21	279
																							hypothetical protein	B9J08_001497	B9J08_001497	protein_coding	0	17	5	358
																							hypothetical protein	B9J08_001498	B9J08_001498	protein_coding	1	62	69	416
																							hypothetical protein	B9J08_001499	B9J08_001499	protein_coding	0	38	7	435
																							hypothetical protein	B9J08_001500	B9J08_001500	protein_coding	0	6	0	399
																							hypothetical protein	B9J08_001501	B9J08_001501	protein_coding	2	66	43	463
																							hypothetical protein	B9J08_001502	B9J08_001502	protein_coding	0	33	24	452
																							hypothetical protein	B9J08_001506	B9J08_001506	protein_coding	0	48	26	533
																							hypothetical protein	B9J08_001507	B9J08_001507	protein_coding	0	41	18	468
																							hypothetical protein	B9J08_001508	B9J08_001508	protein_coding	0	31	5	465
																							hypothetical protein	B9J08_001509	B9J08_001509	protein_coding	0	18	0	507
																							hypothetical protein	B9J08_001510	B9J08_001510	protein_coding	0	13	0	509
																							hypothetical protein	B9J08_001511	B9J08_001511	protein_coding	0	36	3	455
																							hypothetical protein	B9J08_001512	B9J08_001512	protein_coding	1	48	19	402
																							hypothetical protein	B9J08_001513	B9J08_001513	protein_coding	0	10	1	344
																							hypothetical protein	B9J08_001514	B9J08_001514	protein_coding	0	6	0	373
																							hypothetical protein	B9J08_001515	B9J08_001515	protein_coding	0	20	2	296
																							hypothetical protein	B9J08_001516	B9J08_001516	protein_coding	1	20	7	355
																							hypothetical protein	B9J08_001517	B9J08_001517	protein_coding	4	31	85	216
																							hypothetical protein	B9J08_001518	B9J08_001518	protein_coding	0	6	1	225
																							hypothetical protein	B9J08_001519	B9J08_001519	protein_coding	1	22	3	188
																							hypothetical protein	B9J08_001520	B9J08_001520	protein_coding	0	1	0	68
																							hypothetical protein	B9J08_001521	B9J08_001521	protein_coding	0	0	2	41
																							hypothetical protein	B9J08_001522	B9J08_001522	protein_coding	0	0	0	29
																							hypothetical protein	B9J08_001523	B9J08_001523	protein_coding	0	0	2	97
																							hypothetical protein	B9J08_001524	B9J08_001524	protein_coding	0	0	3	91
																							hypothetical protein	B9J08_001525	B9J08_001525	protein_coding	0	18	4	66
																							hypothetical protein	B9J08_001526	B9J08_001526	protein_coding	1	5	3	84
																							hypothetical protein	B9J08_001527	B9J08_001527	protein_coding	0	0	1	96
																							hypothetical protein	B9J08_001528	B9J08_001528	protein_coding	0	1	2	72
																							hypothetical protein	B9J08_001529	B9J08_001529	protein_coding	2	3	0	149
																							hypothetical protein	B9J08_001530	B9J08_001530	protein_coding	0	19	3	277
																							hypothetical protein	B9J08_001531	B9J08_001531	protein_coding	0	33	27	422
																							hypothetical protein	B9J08_001532	B9J08_001532	protein_coding	3	55	35	248
																							hypothetical protein	B9J08_001533	B9J08_001533	protein_coding	0	41	5	275
																							hypothetical protein	B9J08_001534	B9J08_001534	protein_coding	0	14	1	304
																							hypothetical protein	B9J08_001535	B9J08_001535	protein_coding	0	2	3	264
																							hypothetical protein	B9J08_001536	B9J08_001536	protein_coding	1	22	3	247
																							hypothetical protein	B9J08_001537	B9J08_001537	protein_coding	0	12	5	244
																							hypothetical protein	B9J08_001538	B9J08_001538	protein_coding	0	7	6	284
																							hypothetical protein	B9J08_001539	B9J08_001539	protein_coding	0	56	14	242
																							hypothetical protein	B9J08_001541	B9J08_001541	protein_coding	1	11	0	308
																							hypothetical protein	B9J08_001542	B9J08_001542	protein_coding	1	34	8	307
																							hypothetical protein	B9J08_001544	B9J08_001544	protein_coding	0	17	7	300
																							hypothetical protein	B9J08_001545	B9J08_001545	protein_coding	0	17	0	278
																							hypothetical protein	B9J08_001546	B9J08_001546	protein_coding	1	19	4	276
																							hypothetical protein	B9J08_001547	B9J08_001547	protein_coding	0	14	0	293
																							hypothetical protein	B9J08_001548	B9J08_001548	protein_coding	1	4	0	247
																							hypothetical protein	B9J08_001549	B9J08_001549	protein_coding	0	6	5	233
																							hypothetical protein	B9J08_001550	B9J08_001550	protein_coding	0	23	29	215
																							hypothetical protein	B9J08_001551	B9J08_001551	protein_coding	0	3	4	247
																							hypothetical protein	B9J08_001552	B9J08_001552	protein_coding	0	16	4	228
																							hypothetical protein	B9J08_001553	B9J08_001553	protein_coding	0	8	5	186
																							hypothetical protein	B9J08_001554	B9J08_001554	protein_coding	0	11	5	152
																							hypothetical protein	B9J08_001555	B9J08_001555	protein_coding	0	5	3	144
																							hypothetical protein	B9J08_001556	B9J08_001556	protein_coding	0	2	2	116
																							hypothetical protein	B9J08_001558	B9J08_001558	protein_coding	0	19	7	121
																							hypothetical protein	B9J08_001559	B9J08_001559	protein_coding	0	22	5	147
																							hypothetical protein	B9J08_001560	B9J08_001560	protein_coding	0	14	4	133
																							hypothetical protein	B9J08_001562	B9J08_001562	protein_coding	0	9	1	181
																							hypothetical protein	B9J08_001563	B9J08_001563	protein_coding	0	0	1	167
																							hypothetical protein	B9J08_001564	B9J08_001564	protein_coding	0	4	0	191
																							hypothetical protein	B9J08_001565	B9J08_001565	protein_coding	2	33	37	205
																							hypothetical protein	B9J08_001566	B9J08_001566	protein_coding	0	32	13	332
																							hypothetical protein	B9J08_001567	B9J08_001567	protein_coding	0	14	8	302
																							hypothetical protein	B9J08_001568	B9J08_001568	protein_coding	0	3	0	308
																							hypothetical protein	B9J08_001569	B9J08_001569	protein_coding	0	1	1	301
																							hypothetical protein	B9J08_001570	B9J08_001570	protein_coding	0	11	2	272
																							hypothetical protein	B9J08_001571	B9J08_001571	protein_coding	0	6	1	290
																							hypothetical protein	B9J08_001572	B9J08_001572	protein_coding	0	28	21	211
																							hypothetical protein	B9J08_001574	B9J08_001574	protein_coding	0	9	3	166
																							hypothetical protein	B9J08_001575	B9J08_001575	protein_coding	0	3	4	165
																							hypothetical protein	B9J08_001576	B9J08_001576	protein_coding	0	25	8	244
																							hypothetical protein	B9J08_001577	B9J08_001577	protein_coding	0	3	0	189
																							hypothetical protein	B9J08_001579	B9J08_001579	protein_coding	0	12	9	241
																							hypothetical protein	B9J08_001580	B9J08_001580	protein_coding	0	19	5	272
																							hypothetical protein	B9J08_001581	B9J08_001581	protein_coding	0	64	10	260
																							hypothetical protein	B9J08_001582	B9J08_001582	protein_coding	0	3	0	202
																							hypothetical protein	B9J08_001584	B9J08_001584	protein_coding	0	2	0	116
																							hypothetical protein	B9J08_001585	B9J08_001585	protein_coding	0	5	14	81
																							hypothetical protein	B9J08_001586	B9J08_001586	protein_coding	0	4	7	79
																							hypothetical protein	B9J08_001587	B9J08_001587	protein_coding	0	6	5	66
																							hypothetical protein	B9J08_001588	B9J08_001588	protein_coding	0	6	3	88
																							hypothetical protein	B9J08_001589	B9J08_001589	protein_coding	0	2	1	143
																							hypothetical protein	B9J08_001590	B9J08_001590	protein_coding	0	1	1	144
																							hypothetical protein	B9J08_001593	B9J08_001593	protein_coding	0	3	4	159
																							hypothetical protein	B9J08_001595	B9J08_001595	protein_coding	0	1	5	79
																							hypothetical protein	B9J08_001596	B9J08_001596	protein_coding	0	10	10	74
																							hypothetical protein	B9J08_001597	B9J08_001597	protein_coding	0	5	2	80
																							hypothetical protein	B9J08_001599	B9J08_001599	protein_coding	0	4	5	67
																							hypothetical protein	B9J08_001600	B9J08_001600	protein_coding	0	1	1	60
																							hypothetical protein	B9J08_001601	B9J08_001601	protein_coding	0	2	3	63
																							hypothetical protein	B9J08_001603	B9J08_001603	protein_coding	0	2	2	67
																							hypothetical protein	B9J08_001604	B9J08_001604	protein_coding	0	5	1	73
																							hypothetical protein	B9J08_001605	B9J08_001605	protein_coding	0	13	4	75
																							hypothetical protein	B9J08_001607	B9J08_001607	protein_coding	0	4	6	125
																							hypothetical protein	B9J08_001608	B9J08_001608	protein_coding	1	8	8	117
																							hypothetical protein	B9J08_001609	B9J08_001609	protein_coding	0	9	4	120
																							hypothetical protein	B9J08_001610	B9J08_001610	protein_coding	0	3	1	120
																							hypothetical protein	B9J08_001611	B9J08_001611	protein_coding	0	14	5	149
																							hypothetical protein	B9J08_001612	B9J08_001612	protein_coding	0	27	3	108
																							hypothetical protein	B9J08_001615	B9J08_001615	protein_coding	0	10	1	167
																							hypothetical protein	B9J08_001616	B9J08_001616	protein_coding	0	3	0	165
																							hypothetical protein	B9J08_001617	B9J08_001617	protein_coding	0	14	6	144
																							hypothetical protein	B9J08_001618	B9J08_001618	protein_coding	0	13	9	144
																							hypothetical protein	B9J08_001619	B9J08_001619	protein_coding	0	6	8	127
																							hypothetical protein	B9J08_001620	B9J08_001620	protein_coding	0	7	4	111
																							hypothetical protein	B9J08_001621	B9J08_001621	protein_coding	0	4	7	93
																							hypothetical protein	B9J08_001622	B9J08_001622	protein_coding	0	5	0	93
																							hypothetical protein	B9J08_001623	B9J08_001623	protein_coding	0	12	17	85
																							hypothetical protein	B9J08_001626	B9J08_001626	protein_coding	0	29	18	197
																							hypothetical protein	B9J08_001627	B9J08_001627	protein_coding	0	27	21	186
																							hypothetical protein	B9J08_001630	B9J08_001630	protein_coding	0	2	1	250
																							hypothetical protein	B9J08_001631	B9J08_001631	protein_coding	0	21	8	264
																							hypothetical protein	B9J08_001632	B9J08_001632	protein_coding	0	17	12	276
																							hypothetical protein	B9J08_001633	B9J08_001633	protein_coding	0	19	5	208
																							hypothetical protein	B9J08_001634	B9J08_001634	protein_coding	0	10	29	176
																							hypothetical protein	B9J08_001635	B9J08_001635	protein_coding	0	7	15	168
																							hypothetical protein	B9J08_001636	B9J08_001636	protein_coding	0	13	2	186
																							hypothetical protein	B9J08_001637	B9J08_001637	protein_coding	0	3	4	177
																							hypothetical protein	B9J08_001638	B9J08_001638	protein_coding	0	6	5	145
																							hypothetical protein	B9J08_001639	B9J08_001639	protein_coding	0	0	0	155
																							hypothetical protein	B9J08_001640	B9J08_001640	protein_coding	0	2	2	161
																							hypothetical protein	B9J08_001641	B9J08_001641	protein_coding	0	5	5	145
																							hypothetical protein	B9J08_001642	B9J08_001642	protein_coding	0	18	4	122
																							hypothetical protein	B9J08_001643	B9J08_001643	protein_coding	0	14	2	133
																							hypothetical protein	B9J08_001644	B9J08_001644	protein_coding	0	10	1	141
																							hypothetical protein	B9J08_001646	B9J08_001646	protein_coding	0	5	0	117
																							hypothetical protein	B9J08_001647	B9J08_001647	protein_coding	0	5	1	131
																							hypothetical protein	B9J08_001648	B9J08_001648	protein_coding	0	5	5	122
																							hypothetical protein	B9J08_001649	B9J08_001649	protein_coding	0	9	13	152
																							hypothetical protein	B9J08_001650	B9J08_001650	protein_coding	0	3	2	118
																							hypothetical protein	B9J08_001651	B9J08_001651	protein_coding	0	2	0	119
																							hypothetical protein	B9J08_001654	B9J08_001654	protein_coding	0	4	6	154
																							hypothetical protein	B9J08_001655	B9J08_001655	protein_coding	0	18	9	155
																							hypothetical protein	B9J08_001656	B9J08_001656	protein_coding	0	17	6	123
																							hypothetical protein	B9J08_001657	B9J08_001657	protein_coding	0	9	1	155
																							hypothetical protein	B9J08_001658	B9J08_001658	protein_coding	1	24	16	138
																							hypothetical protein	B9J08_001659	B9J08_001659	protein_coding	0	3	1	122
																							hypothetical protein	B9J08_001660	B9J08_001660	protein_coding	0	9	0	149
																							hypothetical protein	B9J08_001663	B9J08_001663	protein_coding	0	4	2	136
																							hypothetical protein	B9J08_001664	B9J08_001664	protein_coding	0	23	6	137
																							hypothetical protein	B9J08_001665	B9J08_001665	protein_coding	1	33	6	142
																							hypothetical protein	B9J08_001666	B9J08_001666	protein_coding	0	17	11	136
																							hypothetical protein	B9J08_001667	B9J08_001667	protein_coding	0	15	5	165
																							hypothetical protein	B9J08_001668	B9J08_001668	protein_coding	0	2	6	147
																							hypothetical protein	B9J08_001669	B9J08_001669	protein_coding	0	19	2	158
																							hypothetical protein	B9J08_001671	B9J08_001671	protein_coding	0	1	2	164
																							hypothetical protein	B9J08_001672	B9J08_001672	protein_coding	0	24	5	166
																							hypothetical protein	B9J08_001673	B9J08_001673	protein_coding	0	33	1	191
																							hypothetical protein	B9J08_001675	B9J08_001675	protein_coding	0	22	11	161
																							hypothetical protein	B9J08_001676	B9J08_001676	protein_coding	0	13	3	105
																							hypothetical protein	B9J08_001677	B9J08_001677	protein_coding	0	6	6	142
																							hypothetical protein	B9J08_001678	B9J08_001678	protein_coding	0	6	5	153
																							hypothetical protein	B9J08_001679	B9J08_001679	protein_coding	0	24	11	247
																							hypothetical protein	B9J08_001680	B9J08_001680	protein_coding	0	7	4	201
																							hypothetical protein	B9J08_001681	B9J08_001681	protein_coding	2	34	22	168
																							hypothetical protein	B9J08_001682	B9J08_001682	protein_coding	0	5	4	220
																							hypothetical protein	B9J08_001683	B9J08_001683	protein_coding	0	3	0	178
																							hypothetical protein	B9J08_001685	B9J08_001685	protein_coding	0	6	1	142
																							hypothetical protein	B9J08_001687	B9J08_001687	protein_coding	0	17	1	122
																							hypothetical protein	B9J08_001688	B9J08_001688	protein_coding	0	4	4	133
																							hypothetical protein	B9J08_001689	B9J08_001689	protein_coding	0	6	2	106
																							hypothetical protein	B9J08_001690	B9J08_001690	protein_coding	0	0	0	98
																							hypothetical protein	B9J08_001691	B9J08_001691	protein_coding	0	3	6	71
																							hypothetical protein	B9J08_001692	B9J08_001692	protein_coding	0	8	4	65
																							hypothetical protein	B9J08_001694	B9J08_001694	protein_coding	0	9	4	129
																							hypothetical protein	B9J08_001696	B9J08_001696	protein_coding	0	4	4	168
																							hypothetical protein	B9J08_001697	B9J08_001697	protein_coding	0	4	1	144
																							hypothetical protein	B9J08_001698	B9J08_001698	protein_coding	0	13	1	101
																							hypothetical protein	B9J08_001699	B9J08_001699	protein_coding	0	13	5	98
																							hypothetical protein	B9J08_001700	B9J08_001700	protein_coding	0	10	4	116
																							hypothetical protein	B9J08_001703	B9J08_001703	protein_coding	0	19	14	152
																							hypothetical protein	B9J08_001704	B9J08_001704	protein_coding	0	34	19	165
																							hypothetical protein	B9J08_001705	B9J08_001705	protein_coding	0	10	11	195
																							hypothetical protein	B9J08_001706	B9J08_001706	protein_coding	0	20	17	188
																							hypothetical protein	B9J08_001707	B9J08_001707	protein_coding	1	22	11	209
																							hypothetical protein	B9J08_001708	B9J08_001708	protein_coding	0	5	3	183
																							hypothetical protein	B9J08_001709	B9J08_001709	protein_coding	0	8	7	171
																							hypothetical protein	B9J08_001710	B9J08_001710	protein_coding	0	12	4	149
																							hypothetical protein	B9J08_001711	B9J08_001711	protein_coding	0	5	7	101
																							hypothetical protein	B9J08_001712	B9J08_001712	protein_coding	0	7	9	86
																							hypothetical protein	B9J08_001713	B9J08_001713	protein_coding	0	7	2	95
																							hypothetical protein	B9J08_001714	B9J08_001714	protein_coding	0	1	0	75
																							hypothetical protein	B9J08_001716	B9J08_001716	protein_coding	0	16	8	77
																							hypothetical protein	B9J08_001717	B9J08_001717	protein_coding	0	4	3	81
																							hypothetical protein	B9J08_001718	B9J08_001718	protein_coding	0	6	1	97
																							hypothetical protein	B9J08_001719	B9J08_001719	protein_coding	0	3	6	81
																							hypothetical protein	B9J08_001720	B9J08_001720	protein_coding	0	3	3	94
																							hypothetical protein	B9J08_001721	B9J08_001721	protein_coding	0	2	0	99
																							hypothetical protein	B9J08_001722	B9J08_001722	protein_coding	0	2	2	98
																							hypothetical protein	B9J08_001724	B9J08_001724	protein_coding	0	6	2	87
																							hypothetical protein	B9J08_001725	B9J08_001725	protein_coding	0	1	2	70
																							hypothetical protein	B9J08_001726	B9J08_001726	protein_coding	0	5	2	97
																							hypothetical protein	B9J08_001727	B9J08_001727	protein_coding	0	2	2	102
																							hypothetical protein	B9J08_001728	B9J08_001728	protein_coding	0	5	2	75
																							hypothetical protein	B9J08_001729	B9J08_001729	protein_coding	1	6	8	80
																							hypothetical protein	B9J08_001730	B9J08_001730	protein_coding	0	30	15	91
																							hypothetical protein	B9J08_001731	B9J08_001731	protein_coding	0	11	4	71
																							hypothetical protein	B9J08_001733	B9J08_001733	protein_coding	0	2	0	81
																							hypothetical protein	B9J08_001734	B9J08_001734	protein_coding	0	11	8	103
																							hypothetical protein	B9J08_001735	B9J08_001735	protein_coding	0	0	0	97
																							hypothetical protein	B9J08_001736	B9J08_001736	protein_coding	0	0	2	95
																							hypothetical protein	B9J08_001737	B9J08_001737	protein_coding	0	15	4	90
																							hypothetical protein	B9J08_001738	B9J08_001738	protein_coding	1	16	5	94
																							hypothetical protein	B9J08_001739	B9J08_001739	protein_coding	0	5	3	110
																							hypothetical protein	B9J08_001740	B9J08_001740	protein_coding	0	10	2	100
																							hypothetical protein	B9J08_001741	B9J08_001741	protein_coding	0	9	4	113
																							hypothetical protein	B9J08_001742	B9J08_001742	protein_coding	0	9	4	104
																							hypothetical protein	B9J08_001743	B9J08_001743	protein_coding	0	2	6	147
																							hypothetical protein	B9J08_001744	B9J08_001744	protein_coding	0	4	3	134
																							hypothetical protein	B9J08_001745	B9J08_001745	protein_coding	0	6	7	177
																							hypothetical protein	B9J08_001746	B9J08_001746	protein_coding	0	9	1	178
																							hypothetical protein	B9J08_001747	B9J08_001747	protein_coding	0	14	12	188
																							hypothetical protein	B9J08_001748	B9J08_001748	protein_coding	0	7	7	144
																							hypothetical protein	B9J08_001749	B9J08_001749	protein_coding	0	1	4	112
																							hypothetical protein	B9J08_001750	B9J08_001750	protein_coding	0	1	2	112
																							hypothetical protein	B9J08_001751	B9J08_001751	protein_coding	0	0	1	115
																							hypothetical protein	B9J08_001752	B9J08_001752	protein_coding	0	9	1	128
																							hypothetical protein	B9J08_001753	B9J08_001753	protein_coding	0	4	9	137
																							hypothetical protein	B9J08_001754	B9J08_001754	protein_coding	0	50	17	162
																							hypothetical protein	B9J08_001755	B9J08_001755	protein_coding	0	1	0	200
																							hypothetical protein	B9J08_001757	B9J08_001757	protein_coding	0	6	5	227
																							hypothetical protein	B9J08_001758	B9J08_001758	protein_coding	1	41	30	180
																							hypothetical protein	B9J08_001759	B9J08_001759	protein_coding	0	13	1	203
																							hypothetical protein	B9J08_001760	B9J08_001760	protein_coding	0	9	9	167
																							hypothetical protein	B9J08_001762	B9J08_001762	protein_coding	0	8	2	140
																							hypothetical protein	B9J08_001763	B9J08_001763	protein_coding	2	13	12	105
																							hypothetical protein	B9J08_001764	B9J08_001764	protein_coding	0	5	1	130
																							hypothetical protein	B9J08_001766	B9J08_001766	protein_coding	2	22	25	117
																							hypothetical protein	B9J08_001767	B9J08_001767	protein_coding	1	3	7	140
																							hypothetical protein	B9J08_001768	B9J08_001768	protein_coding	0	26	23	123
																							hypothetical protein	B9J08_001769	B9J08_001769	protein_coding	0	25	20	146
																							hypothetical protein	B9J08_001770	B9J08_001770	protein_coding	0	6	3	123
																							hypothetical protein	B9J08_001771	B9J08_001771	protein_coding	0	2	0	117
																							hypothetical protein	B9J08_001773	B9J08_001773	protein_coding	0	15	3	105
																							hypothetical protein	B9J08_001774	B9J08_001774	protein_coding	0	17	7	134
																							hypothetical protein	B9J08_001775	B9J08_001775	protein_coding	0	4	1	110
																							hypothetical protein	B9J08_001777	B9J08_001777	protein_coding	0	0	0	130
																							hypothetical protein	B9J08_001778	B9J08_001778	protein_coding	0	7	7	147
																							hypothetical protein	B9J08_001779	B9J08_001779	protein_coding	2	26	20	130
																							hypothetical protein	B9J08_001780	B9J08_001780	protein_coding	0	17	8	133
																							hypothetical protein	B9J08_001781	B9J08_001781	protein_coding	0	0	2	132
																							hypothetical protein	B9J08_001782	B9J08_001782	protein_coding	0	2	1	142
																							hypothetical protein	B9J08_001783	B9J08_001783	protein_coding	1	13	6	130
																							hypothetical protein	B9J08_001785	B9J08_001785	protein_coding	0	17	5	118
																							hypothetical protein	B9J08_001786	B9J08_001786	protein_coding	0	10	4	117
																							hypothetical protein	B9J08_001787	B9J08_001787	protein_coding	0	12	7	133
																							hypothetical protein	B9J08_001788	B9J08_001788	protein_coding	0	13	2	152
																							hypothetical protein	B9J08_001789	B9J08_001789	protein_coding	0	10	14	141
																							hypothetical protein	B9J08_001790	B9J08_001790	protein_coding	0	24	9	141
																							hypothetical protein	B9J08_001791	B9J08_001791	protein_coding	0	14	12	176
																							hypothetical protein	B9J08_001792	B9J08_001792	protein_coding	0	1	0	211
																							hypothetical protein	B9J08_001793	B9J08_001793	protein_coding	0	8	9	210
																							hypothetical protein	B9J08_001795	B9J08_001795	protein_coding	0	9	15	166
																							hypothetical protein	B9J08_001796	B9J08_001796	protein_coding	0	19	17	147
																							hypothetical protein	B9J08_001799	B9J08_001799	protein_coding	0	15	0	168
																							hypothetical protein	B9J08_001800	B9J08_001800	protein_coding	0	8	7	223
																							hypothetical protein	B9J08_001801	B9J08_001801	protein_coding	0	17	0	225
																							hypothetical protein	B9J08_001802	B9J08_001802	protein_coding	0	15	9	205
																							hypothetical protein	B9J08_001804	B9J08_001804	protein_coding	0	4	1	156
																							hypothetical protein	B9J08_001805	B9J08_001805	protein_coding	0	1	0	151
																							hypothetical protein	B9J08_001806	B9J08_001806	protein_coding	0	14	8	133
																							hypothetical protein	B9J08_001807	B9J08_001807	protein_coding	0	2	0	86
																							hypothetical protein	B9J08_001808	B9J08_001808	protein_coding	3	3	10	86
																							hypothetical protein	B9J08_001809	B9J08_001809	protein_coding	0	7	0	83
																							hypothetical protein	B9J08_001810	B9J08_001810	protein_coding	0	14	16	84
																							hypothetical protein	B9J08_001811	B9J08_001811	protein_coding	0	8	3	79
																							hypothetical protein	B9J08_001812	B9J08_001812	protein_coding	0	4	3	69
																							hypothetical protein	B9J08_001813	B9J08_001813	protein_coding	0	8	3	91
																							hypothetical protein	B9J08_001814	B9J08_001814	protein_coding	0	1	2	79
																							hypothetical protein	B9J08_001815	B9J08_001815	protein_coding	0	10	9	64
																							hypothetical protein	B9J08_001816	B9J08_001816	protein_coding	0	3	0	74
																							hypothetical protein	B9J08_001817	B9J08_001817	protein_coding	0	5	3	83
																							hypothetical protein	B9J08_001818	B9J08_001818	protein_coding	0	1	0	73
																							hypothetical protein	B9J08_001819	B9J08_001819	protein_coding	0	7	6	67
																							hypothetical protein	B9J08_001820	B9J08_001820	protein_coding	0	0	0	56
[truncated: 3,577 more rows]
