# Supplementary material for: Genomic insights into multidrug-resistance, mating and virulence in Candida auris and related emerging species
Source: Nat Commun. 2018 Dec 17;9:5346. doi: 10.1038/s41467-018-07779-6 (PMC6297351; doi:10.1038/s41467-018-07779-6)
Supplement: Supplementary file 6 — Supplementary Data 4 [file 41467_2018_7779_MOESM6_ESM.xlsx]

## Sheet: Data4. Duplication regions
Table S6. Duplicated regions in Candida auris isolates
Isolate	Clade	CNV event	Position in B11221	Length	normalized rd	p-val1	p-val2	p-val3	p-val4	q0
B11213_India	Clade1	duplication	sc.02:1127001-1153000	26000	1.21127	0.00208369	1466350000	0.0141874	1544130000	1
B11227_South_Africa	Clade3	duplication	sc.03:97001-250000	153000	2.17569	0	0	0	0	1
B11229_South_Africa	Clade3	duplication	sc.03:97001-250000	153000	2.04476	0	0	0	0	1
B11119_Pakistan	Clade1	duplication	sc.05:1-12000	12000	2.09879	0.0050314	7.57377e-40	0.159547	9.45727e-32	1
B11209_India	Clade1	duplication	sc.05:1-12000	12000	2.09247	0.00686485	3.03722e-55	0.117538	1.39659e-44	1
B11210_India	Clade1	duplication	sc.05:1-12000	12000	2.09603	0.00437852	1.24363e-38	0.108625	9.74053e-31	1
B11213_India	Clade1	duplication	sc.05:1-12000	12000	2.14163	0.00798578	8.50152e-59	0.128722	1.52846e-47	1
B11117_Pakistan	Clade1	duplication	sc.05:1-13000	13000	1.98798	0.00203181	1.14786e-35	0.0126662	7.76914e-29	1
B11220_Type_Strain_Japan	Clade2	duplication	sc.07:157001-289000	132000	2.04022	0	2.87933	0	3.94127	1
B11096_Pakistan	Clade1	duplication	sc.07:240001-312000	72000	1.26157	0	0.0587643	0	0.11642	1
B11227_South_Africa	Clade3	duplication	sc.14:2001-20000	18000	1.62736	0.00142756	16738.2	0.0216353	63870.5	1
B11221_South_Africa	Clade3	duplication	sc.14:4001-20000	16000	1.50122	0.00809365	7.2134e-12	0.0356161	2.71098e-09	1

## Sheet: Data4. Duplication genes
Supplementary data4. Genes found in duplicated regions in Candida auris isolates
Isolate	Clade	Scaffold	Duplication_start	Duplication_end	Gene_start	Gene_end	Locus ID	Name	Pfam	EC	KO	TMHMM	C. albicans homolog
B11096_Pakistan	Clade1	sc.07	240001	312000	253806	254336	CJI97_001888	nascent polypeptide-associated complex subunit alpha	PF01849.13|NAC[NAC domain]	.	.	.	C3_04140C_A	EGD2	64.84
B11096_Pakistan	Clade1	sc.07	240001	312000	254930	259435	CJI97_001889	hypothetical protein	PF13246.1|Hydrolase_like2[Putative hydrolase of sodium-potassium ATPase alpha subunit];PF00702.21|Hydrolase[haloacid dehalogenase-like hydrolase];PF12710.2|HAD[haloacid dehalogenase-like hydrolase];PF00122.15|E1-E2_ATPase[E1-E2 ATPase]	.	.	TMH:10	C3_03250W_A	.	62.95
B11096_Pakistan	Clade1	sc.07	240001	312000	262491	262766	CJI97_001891	hypothetical protein	PF10200.4|Ndufs5[NADH:ubiquinone oxidoreductase, NDUFS5-15kDa]	EC:1.6.99.3[NADH dehydrogenase.];EC:1.6.5.3[NADH:ubiquinone reductase (H(+)-translocating).]	ko05016[Huntington's disease];ko05010[Alzheimer's disease];ko05012[Parkinson's disease]	.	C3_03340C_A	.	54.95
B11096_Pakistan	Clade1	sc.07	240001	312000	262860	264848	CJI97_001892	hypothetical protein	PF07540.6|NOC3p[Nucleolar complex-associated protein];PF03914.12|CBF[CBF/Mak21 family]	.	.	.	C7_03850W_A	.	45.29
B11096_Pakistan	Clade1	sc.07	240001	312000	265429	266997	CJI97_001893	hypothetical protein	PF00067.17|p450[Cytochrome P450]	EC:1.14.14.-[With reduced flavin or flavoprotein as one donor, and incorporation of one atom of oxygen.]	.	.	C7_02840C_A	ERG5	81.7
B11096_Pakistan	Clade1	sc.07	240001	312000	267091	268859	CJI97_001894	6-phosphogluconate dehydrogenase%2C decarboxylating	PF00393.14|6PGD[6-phosphogluconate dehydrogenase, C-terminal domain];TIGR00873[gnd: 6-phosphogluconate dehydrogenase (decarboxylating)];PF03446.10|NAD_binding_2[NAD binding domain of 6-phosphogluconate dehydrogenase]	EC:1.1.1.44[Phosphogluconate dehydrogenase (decarboxylating).]	ko00480[Glutathione metabolism]	.	C1_13860C_A	GND1	81.63
B11096_Pakistan	Clade1	sc.07	240001	312000	269896	271500	CJI97_001895	sulfate adenylyltransferase	PF01747.12|ATP-sulfurylase[ATP-sulfurylase];PF14306.1|PUA_2[PUA-like domain];TIGR00339[sopT: sulfate adenylyltransferase]	EC:2.7.7.4[Sulfate adenylyltransferase.]	ko00450[Selenocompound metabolism];ko00920[Sulfur metabolism]	.	C1_13870W_A	MET3	67.68
B11096_Pakistan	Clade1	sc.07	240001	312000	273539	274060	CJI97_001896	magnesium-dependent phosphatase-1	TIGR01685[MDP-1: magnesium-dependent phosphatase-1];PF12689.2|Acid_PPase[Acid Phosphatase]	.	.	.	C3_03860W_A	.	49.7
B11096_Pakistan	Clade1	sc.07	240001	312000	275581	275943	CJI97_001897	hypothetical protein	.	.	.	.	.	.	.
B11096_Pakistan	Clade1	sc.07	240001	312000	276449	277105	CJI97_001898	hypothetical protein	.	.	.	.	.	.	.
B11096_Pakistan	Clade1	sc.07	240001	312000	284836	286894	CJI97_001900	sporulation protein RMD1	PF02582.9|DUF155[Uncharacterised ACR, YagE family COG1723]	.	.	TMH:1	C3_01190C_A	.	75.98
B11096_Pakistan	Clade1	sc.07	240001	312000	287362	289024	CJI97_001901	hypothetical protein	.	.	.	.	C3_01180C_B	MSS4	47.17
B11096_Pakistan	Clade1	sc.07	240001	312000	289077	290252	CJI97_001902	hypothetical protein	PF01987.12|AIM24[Mitochondrial biogenesis AIM24]	.	.	.	C3_01170W_A	.	31.91
B11096_Pakistan	Clade1	sc.07	240001	312000	290371	292281	CJI97_001903	hypothetical protein	PF01504.13|PIP5K[Phosphatidylinositol-4-phosphate 5-Kinase]	EC:2.7.1.68[1-phosphatidylinositol-4-phosphate 5-kinase.]	ko04070[Phosphatidylinositol signaling system];ko04144[Endocytosis];ko04810[Regulation of actin cytoskeleton];ko04666[Fc gamma R-mediated phagocytosis]	.	C3_01160W_A	AYR1	65.46
B11096_Pakistan	Clade1	sc.07	240001	312000	293895	294806	CJI97_001904	hypothetical protein	PF06999.7|Suc_Fer-like[Sucrase/ferredoxin-like]	.	.	.	C3_01150C_A	.	49.84
B11096_Pakistan	Clade1	sc.07	240001	312000	296988	297860	CJI97_001906	hypothetical protein	PF13460.1|NAD_binding_10[NADH(P)-binding];PF08643.5|DUF1776[Fungal family of unknown function (DUF1776)];PF08659.5|KR[KR domain];PF13561.1|adh_short_C2[Enoyl-(Acyl carrier protein) reductase];PF00106.20|adh_short[short chain dehydrogenase]	.	.	.	C3_00900C_A	KGD1	65.4
B11096_Pakistan	Clade1	sc.07	240001	312000	297893	299929	CJI97_001907	hypothetical protein	PF05057.9|DUF676[Putative serine esterase (DUF676)]	.	.	.	C3_00890C_A	PAM17	47.95
B11096_Pakistan	Clade1	sc.07	240001	312000	300054	303101	CJI97_001908	2-oxoglutarate dehydrogenase%2C mitochondrial	TIGR00239[2oxo_dh_E1: oxoglutarate dehydrogenase (succinyl-transferring), E1 component];PF00676.15|E1_dh[Dehydrogenase E1 component];PF02779.19|Transket_pyr[Transketolase, pyrimidine binding domain]	EC:1.2.4.2[Oxoglutarate dehydrogenase (succinyl-transferring).]	ko00380[Tryptophan metabolism];ko00310[Lysine degradation]	.	C3_00880W_A	.	79.04
B11096_Pakistan	Clade1	sc.07	240001	312000	304115	304729	CJI97_001909	hypothetical protein	PF08566.5|Pam17[Mitochondrial import protein Pam17]	.	.	TMH:2	C3_02500W_A	CCP1	56.49
B11096_Pakistan	Clade1	sc.07	240001	312000	305573	309388	CJI97_001910	hypothetical protein	PF00271.26|Helicase_C[Helicase conserved C-terminal domain];PF00270.24|DEAD[DEAD/DEAH box helicase];PF14619.1|SnAC[Snf2-ATP coupling, chromatin remodelling complex];PF00439.20|Bromodomain[Bromodomain];PF00176.18|SNF2_N[SNF2 family N-terminal domain]	EC:3.6.4.-[Acting on acid anhydrides; involved in cellular and subcellular movement.]	.	.	C3_02490C_B	RPL9B	60.39
B11096_Pakistan	Clade1	sc.07	240001	312000	309969	311039	CJI97_001911	hypothetical protein	PF00141.18|peroxidase[Peroxidase]	EC:1.11.1.5[Cytochrome-c peroxidase.]	.	TMH:1	C3_02480C_A	NDE1	60.06
B11096_Pakistan	Clade1	sc.07	240001	312000	311917	312492	CJI97_001912	60S ribosomal protein L9-B	PF00347.18|Ribosomal_L6[Ribosomal protein L6]	.	.	.	C3_02470C_A	UTP20	83.42
B11096_Pakistan	Clade1	sc.07	240001	312000	245265	246929	CJI97_001885	hypothetical protein	PF00070.22|Pyr_redox[Pyridine nucleotide-disulphide oxidoreductase];PF07992.9|Pyr_redox_2[Pyridine nucleotide-disulphide oxidoreductase]	EC:1.6.99.3[NADH dehydrogenase.]	.	.	C3_03420C_A	.	68.56
B11096_Pakistan	Clade1	sc.07	240001	312000	277209	284600	CJI97_001899	hypothetical protein	PF07539.7|DRIM[Down-regulated in metastasis]	.	.	.	C3_01200W_B	.	31.74
B11096_Pakistan	Clade1	sc.07	240001	312000	294835	295899	CJI97_001905	protein disulfide-isomerase domain	PF13905.1|Thioredoxin_8[Thioredoxin-like];PF13098.1|Thioredoxin_2[Thioredoxin-like domain];PF00578.16|AhpC-TSA[AhpC/TSA family];PF00085.15|Thioredoxin[Thioredoxin]	EC:5.3.4.1[Protein disulfide-isomerase.]	.	.	C3_01140W_A	.	47.69
B11096_Pakistan	Clade1	sc.07	240001	312000	259484	262393	CJI97_001890	hypothetical protein	PF07521.7|RMMBL[RNA-metabolising metallo-beta-lactamase];PF13299.1|CPSF100_C[Cleavage and polyadenylation factor 2 C-terminal];PF10996.3|Beta-Casp[Beta-Casp domain]	.	.	.	C3_03260W_A	.	39.92
B11117_Pakistan	Clade1	sc.05	1	13000	1324	3861	CJI97_004557	hypothetical protein	.	.	.	.	.	.	.
B11117_Pakistan	Clade1	sc.05	1	13000	12394	12765	CJI97_004558	hypothetical protein	.	.	.	.	.	.	.
B11119_Pakistan	Clade1	sc.05	1	12000	1324	3861	CJI97_004557	hypothetical protein	.	.	.	.	.	.	.
B11209_India	Clade1	sc.05	1	12000	1324	3861	CJI97_004557	hypothetical protein	.	.	.	.	.	.	.
B11210_India	Clade1	sc.05	1	12000	1324	3861	CJI97_004557	hypothetical protein	.	.	.	.	.	.	.
B11213_India	Clade1	sc.02	1127001	1153000	1127990	1130134	CJI97_000510	hypothetical protein	PF00149.23|Metallophos[Calcineurin-like phosphoesterase]	.	.	TMH:1	C1_00680W_A	ASM3	47.8
B11213_India	Clade1	sc.02	1127001	1153000	1132660	1136700	CJI97_000511	hypothetical protein	PF15405.1|PH_5[Pleckstrin homology domain];PF00621.15|RhoGEF[RhoGEF domain];PF00610.16|DEP[Domain found in Dishevelled, Egl-10, and Pleckstrin (DEP)];PF00780.17|CNH[CNH domain]	.	.	.	C2_03240C_A	ROM2	68.29
B11213_India	Clade1	sc.02	1127001	1153000	1137271	1138221	CJI97_000512	hypothetical protein	PF01151.13|ELO[GNS1/SUR4 family]	EC:2.3.1.-[Transferring groups other than amino-acyl groups.]	.	TMH:6	C1_12790C_A	FEN1	53.21
B11213_India	Clade1	sc.02	1127001	1153000	1142244	1142996	CJI97_000513	hypothetical protein	PF13279.1|4HBT_2[Thioesterase-like superfamily]	.	.	TMH:1	C2_03170W_A	.	48.73
B11213_India	Clade1	sc.02	1127001	1153000	1143059	1143964	CJI97_000514	E3 ubiquitin-protein ligase TOM1	PF00632.20|HECT[HECT-domain (ubiquitin-transferase)]	EC:6.3.2.19[Ubiquitin--protein ligase.]	.	.	C2_03180C_A	TOM1	88.37
B11213_India	Clade1	sc.02	1127001	1153000	1144099	1152834	CJI97_000515	hypothetical protein	PF06012.7|DUF908[Domain of Unknown Function (DUF908)];PF14377.1|DUF4414[Domain of unknown function (DUF4414)];PF06025.7|DUF913[Domain of Unknown Function (DUF913)]	EC:6.3.2.19[Ubiquitin--protein ligase.]	.	.	C2_03180C_A	TOM1	42.16
B11213_India	Clade1	sc.05	1	12000	1324	3861	CJI97_004557	hypothetical protein	.	.	.	.	.	.	.
B11096_Pakistan	Clade1	sc.07	240001	312000	239382	241199	CJI97_001882	hypothetical protein	PF00271.26|Helicase_C[Helicase conserved C-terminal domain];PF13959.1|DUF4217[Domain of unknown function (DUF4217)];PF00270.24|DEAD[DEAD/DEAH box helicase]	EC:3.6.4.13[RNA helicase.]	.	.	C5_01600C_A	SPB4	56.87
B11096_Pakistan	Clade1	sc.07	240001	312000	241210	242754	CJI97_001883	hypothetical protein	PF00899.16|ThiF[ThiF family]	.	.	.	C5_01590W_A	.	46.83
B11096_Pakistan	Clade1	sc.07	240001	312000	243085	244464	CJI97_001884	hypothetical protein	PF13923.1|zf-C3HC4_2[Zinc finger, C3HC4 type (RING finger)];PF00097.20|zf-C3HC4[Zinc finger, C3HC4 type (RING finger)];PF03105.14|SPX[SPX domain];PF15227.1|zf-C3HC4_4[zinc finger of C3HC4-type, RING];PF13639.1|zf-RING_2[Ring finger domain]	.	.	.	C5_00980W_A	TRY3	51.13
B11096_Pakistan	Clade1	sc.07	240001	312000	247360	247875	CJI97_001886	hypothetical protein	.	.	.	.	.	.	.
B11096_Pakistan	Clade1	sc.07	240001	312000	248339	250969	CJI97_001887	hypothetical protein	PF04383.8|KilA-N[KilA-N domain]	.	.	.	C3_04110C_A	MBP1	43.62
B11220_Type_Strain_Japan	Clade2	sc.07	157001	289000	156616	157809	CJI97_001842	hypothetical protein	PF08652.6|RAI1[RAI1 like PD-(D/E)XK nuclease]	.	.	.	C1_06800W_A	.	52.01
B11220_Type_Strain_Japan	Clade2	sc.07	157001	289000	158012	159619	CJI97_001843	hypothetical protein	PF07738.8|Sad1_UNC[Sad1 / UNC-like C-terminal]	.	.	TMH:1	C1_08800W_A	.	48.7
B11220_Type_Strain_Japan	Clade2	sc.07	157001	289000	159653	161500	CJI97_001844	hypothetical protein	PF04851.10|ResIII[Type III restriction enzyme, res subunit];PF00271.26|Helicase_C[Helicase conserved C-terminal domain];PF00270.24|DEAD[DEAD/DEAH box helicase.	.	.	.	C1_08810C_A	MSS116	37.21
B11220_Type_Strain_Japan	Clade2	sc.07	157001	289000	162509	163099	CJI97_001845	hypothetical protein	PF14475.1|Mso1_Sec1_bdg[Sec1-binding region of Mso1]	.	.	.	.	.	.
B11220_Type_Strain_Japan	Clade2	sc.07	157001	289000	168082	169596	CJI97_001847	hypothetical protein	.	.	.	.	C1_09320C_A	.	30.91
B11220_Type_Strain_Japan	Clade2	sc.07	157001	289000	170936	174979	CJI97_001848	hypothetical protein	.	.	.	.	.	.	.
B11220_Type_Strain_Japan	Clade2	sc.07	157001	289000	175024	175554	CJI97_001849	hypothetical protein	PF11176.3|DUF2962[Protein of unknown function (DUF2962)]	.	.	.	C1_09330W_A	.	36.22
B11220_Type_Strain_Japan	Clade2	sc.07	157001	289000	176550	177044	CJI97_001850	hypothetical protein	.	.	.	.	C1_09350W_A	.	59.64
B11220_Type_Strain_Japan	Clade2	sc.07	157001	289000	177187	179808	CJI97_001851	hypothetical protein	.	.	.	.	C1_09360C_A	.	36.67
B11220_Type_Strain_Japan	Clade2	sc.07	157001	289000	181811	182155	CJI97_001852	hypothetical protein	.	.	.	.	.	.	.
B11220_Type_Strain_Japan	Clade2	sc.07	157001	289000	184159	184788	CJI97_001853	hypothetical protein	PF01885.11|PTS_2-RNA[RNA 2'-phosphotransferase, Tpt1 / KptA family]	EC:2.7.1.160[2'-phosphotransferase.]	.	.	C3_00350W_A	TPT1	51.37
B11220_Type_Strain_Japan	Clade2	sc.07	157001	289000	185294	185650	CJI97_001854	hypothetical protein	PF13232.1|Complex1_LYR_1[Complex1_LYR-like];PF05347.10|Complex1_LYR[Complex 1 protein (LYR family)]	.	.	.	C3_00340W_A	.	53.45
B11220_Type_Strain_Japan	Clade2	sc.07	157001	289000	185855	188062	CJI97_001855	hypothetical protein	PF10395.4|Utp8[Utp8 family]	.	.	.	C3_00330W_A	UTP8	30.04
B11220_Type_Strain_Japan	Clade2	sc.07	157001	289000	189064	192066	CJI97_001856	hypothetical protein	PF12451.3|VPS11_C[Vacuolar protein sorting protein 11 C terminal]	.	.	.	C4_05910C_A	VPS11	45
B11220_Type_Strain_Japan	Clade2	sc.07	157001	289000	192224	193339	CJI97_001857	hypothetical protein	.	.	.	.	.	.	.
B11220_Type_Strain_Japan	Clade2	sc.07	157001	289000	194325	195260	CJI97_001858	hypothetical protein	PF02453.12|Reticulon[Reticulon]	.	.	TMH:3	C4_04800W_A	.	48.3
B11220_Type_Strain_Japan	Clade2	sc.07	157001	289000	195444	196349	CJI97_001859	tRNA (guanine-N(7)-)-methyltransferase	TIGR00091[TIGR00091: tRNA (guanine-N(7)-)-methyltransferase];PF02390.12|Methyltransf_4[Putative methyltransferase]	EC:2.1.1.33[tRNA (guanine(46)-N(7))-methyltransferase.]	.	.	C4_04810C_A	.	62.74
B11220_Type_Strain_Japan	Clade2	sc.07	157001	289000	196743	197525	CJI97_001860	hypothetical protein	PF00466.15|Ribosomal_L10[Ribosomal protein L10]	.	.	.	C4_04820C_A	.	50.63
B11220_Type_Strain_Japan	Clade2	sc.07	157001	289000	198208	199716	CJI97_001861	hypothetical protein	PF00636.21|Ribonuclease_3[Ribonuclease III domain];PF14622.1|Ribonucleas_3_3[Ribonuclease-III-like];PF00035.20|dsrm[Double-stranded RNA binding motif]	EC:3.1.26.3[Ribonuclease III.]	.	.	C4_04830W_A	DCR1	33.33
B11220_Type_Strain_Japan	Clade2	sc.07	157001	289000	200206	201675	CJI97_001862	hypothetical protein	.	.	.	.	.	.	.
B11220_Type_Strain_Japan	Clade2	sc.07	157001	289000	202218	202299	CJI97_001863	tRNA-Ser	.	.	.	.	.	.	.
B11220_Type_Strain_Japan	Clade2	sc.07	157001	289000	204075	205775	CJI97_001864	hypothetical protein	PF00557.19|Peptidase_M24[Metallopeptidase family M24]	EC:3.-.-.-[Hydrolases.]	.	.	C1_03230C_A	ARX1	53.12
B11220_Type_Strain_Japan	Clade2	sc.07	157001	289000	208035	208802	CJI97_001865	hypothetical protein	PF00244.15|14-3-3[14-3-3 protein]	.	ko04722[Neurotrophin signaling pathway];ko04114[Oocyte meiosis]	.	C1_03220C_A	BMH1	90.53
B11220_Type_Strain_Japan	Clade2	sc.07	157001	289000	210323	211483	CJI97_001866	hypothetical protein	PF01926.18|MMR_HSR1[50S ribosome-binding GTPase];PF00735.13|Septin[Septin]	.	.	.	C1_03210C_A	CDC12	78.64
B11220_Type_Strain_Japan	Clade2	sc.07	157001	289000	215401	217341	CJI97_001868	hypothetical protein	PF00149.23|Metallophos[Calcineurin-like phosphoesterase]	EC:3.6.1.10[Endopolyphosphatase.]	.	TMH:1	C7_00980W_A	PHM5	52.56
B11220_Type_Strain_Japan	Clade2	sc.07	157001	289000	219000	220259	CJI97_001869	hypothetical protein	PF00046.24|Homeobox[Homeobox domain]	.	.	.	C7_00970C_A	YOX1	76.29
B11220_Type_Strain_Japan	Clade2	sc.07	157001	289000	220411	221472	CJI97_001870	eukaryotic translation initiation factor 3 subunit I	PF00400.27|WD40[WD domain, G-beta repeat]	.	.	.	C1_02790W_A	TIF34	77.74
B11220_Type_Strain_Japan	Clade2	sc.07	157001	289000	221838	222647	CJI97_001871	hypothetical protein	PF01738.13|DLH[Dienelactone hydrolase family];PF12695.2|Abhydrolase_5[Alpha/beta hydrolase family]	EC:3.1.1.45[Carboxymethylenebutenolidase.]	ko00623[Toluene degradation];ko00364[Fluorobenzoate degradation]	.	C1_02780W_A	.	75.4
B11220_Type_Strain_Japan	Clade2	sc.07	157001	289000	224347	225396	CJI97_001872	ATPase GET3	PF01656.18|CbiA[CobQ/CobB/MinD/ParA nucleotide binding domain];PF02374.10|ArsA_ATPase[Anion-transporting ATPase]	EC:3.6.3.16[Arsenite-transporting ATPase.]	.	.	C1_02760W_A	.	85.1
B11220_Type_Strain_Japan	Clade2	sc.07	157001	289000	225726	226643	CJI97_001873	hypothetical protein	.	.	.	.	.	.	.
B11220_Type_Strain_Japan	Clade2	sc.07	157001	289000	227620	227695	CJI97_001874	tRNA-Arg	.	.	.	.	.	.	.
B11220_Type_Strain_Japan	Clade2	sc.07	157001	289000	227778	228644	CJI97_001875	hypothetical protein	PF11309.3|DUF3112[Protein of unknown function (DUF3112)]	.	.	TMH:3	C2_06980W_A	.	54.46
B11220_Type_Strain_Japan	Clade2	sc.07	157001	289000	229802	231271	CJI97_001876	hypothetical protein	PF11309.3|DUF3112[Protein of unknown function (DUF3112)]	.	.	TMH:7	C2_06980W_A	.	54.33
B11220_Type_Strain_Japan	Clade2	sc.07	157001	289000	231841	233223	CJI97_001877	hypothetical protein	PF11309.3|DUF3112[Protein of unknown function (DUF3112)]	.	.	TMH:7	C5_01070C_A	.	52.99
B11220_Type_Strain_Japan	Clade2	sc.07	157001	289000	233900	234337	CJI97_001878	hypothetical protein	PF09696.5|Ctf8[Ctf8]	.	.	.	C5_00740W_A	CTF8	39.76
B11220_Type_Strain_Japan	Clade2	sc.07	157001	289000	234361	236280	CJI97_001879	hypothetical protein	PF00326.16|Peptidase_S9[Prolyl oligopeptidase family];PF13348.1|Y_phosphatase3C[Tyrosine phosphatase family C-terminal region];PF12697.2|Abhydrolase_6[Alpha/beta hydrolase family];PF13350.1|Y_phosphatase3[Tyrosine phosphatase family];PF12695.2|Abhydrolase_5[Alpha/beta hydrolase family]	.	.	.	C5_00750C_A	.	49.84
B11220_Type_Strain_Japan	Clade2	sc.07	157001	289000	237265	237975	CJI97_001880	hypothetical protein	PF04157.11|EAP30[EAP30/Vps36 family]	.	.	.	C5_01620C_A	VPS22	50.58
B11220_Type_Strain_Japan	Clade2	sc.07	157001	289000	237979	239247	CJI97_001881	tRNA pseudouridine(38-40) synthase	TIGR00071[hisT_truA: tRNA pseudouridine(38-40) synthase];PF01416.15|PseudoU_synth_1[tRNA pseudouridine synthase]	EC:5.4.99.45[tRNA pseudouridine(38/39) synthase.]	.	.	C5_01610W_A	.	50.96
B11220_Type_Strain_Japan	Clade2	sc.07	157001	289000	239382	241199	CJI97_001882	hypothetical protein	PF00271.26|Helicase_C[Helicase conserved C-terminal domain];PF13959.1|DUF4217[Domain of unknown function (DUF4217)];PF00270.24|DEAD[DEAD/DEAH box helicase]	EC:3.6.4.13[RNA helicase.]	.	.	C5_01600C_A	SPB4	56.87
B11220_Type_Strain_Japan	Clade2	sc.07	157001	289000	241210	242754	CJI97_001883	hypothetical protein	PF00899.16|ThiF[ThiF family]	.	.	.	C5_01590W_A	.	46.83
B11220_Type_Strain_Japan	Clade2	sc.07	157001	289000	243085	244464	CJI97_001884	hypothetical protein	PF13923.1|zf-C3HC4_2[Zinc finger, C3HC4 type (RING finger)];PF00097.20|zf-C3HC4[Zinc finger, C3HC4 type (RING finger)];PF03105.14|SPX[SPX domain];PF15227.1|zf-C3HC4_4[zinc finger of C3HC4-type, RING];PF13639.1|zf-RING_2[Ring finger domain]	.	.	.	C5_00980W_A	TRY3	51.13
B11220_Type_Strain_Japan	Clade2	sc.07	157001	289000	247360	247875	CJI97_001886	hypothetical protein	.	.	.	.	.	.	.
B11220_Type_Strain_Japan	Clade2	sc.07	157001	289000	248339	250969	CJI97_001887	hypothetical protein	PF04383.8|KilA-N[KilA-N domain]	.	.	.	C3_04110C_A	MBP1	43.62
B11220_Type_Strain_Japan	Clade2	sc.07	157001	289000	253806	254336	CJI97_001888	nascent polypeptide-associated complex subunit alpha	PF01849.13|NAC[NAC domain]	.	.	.	C3_04140C_A	EGD2	64.84
B11220_Type_Strain_Japan	Clade2	sc.07	157001	289000	254930	259435	CJI97_001889	hypothetical protein	PF13246.1|Hydrolase_like2[Putative hydrolase of sodium-potassium ATPase alpha subunit];PF00702.21|Hydrolase[haloacid dehalogenase-like hydrolase];PF12710.2|HAD[haloacid dehalogenase-like hydrolase];PF00122.15|E1-E2_ATPase[E1-E2 ATPase]	.	.	TMH:10	C3_03250W_A	.	62.95
B11220_Type_Strain_Japan	Clade2	sc.07	157001	289000	262491	262766	CJI97_001891	hypothetical protein	PF10200.4|Ndufs5[NADH:ubiquinone oxidoreductase, NDUFS5-15kDa]	EC:1.6.99.3[NADH dehydrogenase.];EC:1.6.5.3[NADH:ubiquinone reductase (H(+)-translocating).]	ko05016[Huntington's disease];ko05010[Alzheimer's disease];ko05012[Parkinson's disease]	.	C3_03340C_A	.	54.95
B11220_Type_Strain_Japan	Clade2	sc.07	157001	289000	262860	264848	CJI97_001892	hypothetical protein	PF07540.6|NOC3p[Nucleolar complex-associated protein];PF03914.12|CBF[CBF/Mak21 family]	.	.	.	C7_03850W_A	.	45.29
B11220_Type_Strain_Japan	Clade2	sc.07	157001	289000	265429	266997	CJI97_001893	hypothetical protein	PF00067.17|p450[Cytochrome P450]	EC:1.14.14.-[With reduced flavin or flavoprotein as one donor, and incorporation of one atom of oxygen.]	.	.	C7_02840C_A	ERG5	81.7
B11220_Type_Strain_Japan	Clade2	sc.07	157001	289000	267091	268859	CJI97_001894	6-phosphogluconate dehydrogenase%2C decarboxylating	PF00393.14|6PGD[6-phosphogluconate dehydrogenase, C-terminal domain];TIGR00873[gnd: 6-phosphogluconate dehydrogenase (decarboxylating)];PF03446.10|NAD_binding_2[NAD binding domain of 6-phosphogluconate dehydrogenase]	EC:1.1.1.44[Phosphogluconate dehydrogenase (decarboxylating).]	ko00480[Glutathione metabolism]	.	C1_13860C_A	GND1	81.63
B11220_Type_Strain_Japan	Clade2	sc.07	157001	289000	269896	271500	CJI97_001895	sulfate adenylyltransferase	PF01747.12|ATP-sulfurylase[ATP-sulfurylase];PF14306.1|PUA_2[PUA-like domain];TIGR00339[sopT: sulfate adenylyltransferase]	EC:2.7.7.4[Sulfate adenylyltransferase.]	ko00450[Selenocompound metabolism];ko00920[Sulfur metabolism]	.	C1_13870W_A	MET3	67.68
B11220_Type_Strain_Japan	Clade2	sc.07	157001	289000	273539	274060	CJI97_001896	magnesium-dependent phosphatase-1	TIGR01685[MDP-1: magnesium-dependent phosphatase-1];PF12689.2|Acid_PPase[Acid Phosphatase]	.	.	.	C3_03860W_A	.	49.7
B11220_Type_Strain_Japan	Clade2	sc.07	157001	289000	275581	275943	CJI97_001897	hypothetical protein	.	.	.	.	.	.	.
B11220_Type_Strain_Japan	Clade2	sc.07	157001	289000	276449	277105	CJI97_001898	hypothetical protein	.	.	.	.	.	.	.
B11220_Type_Strain_Japan	Clade2	sc.07	157001	289000	284836	286894	CJI97_001900	sporulation protein RMD1	PF02582.9|DUF155[Uncharacterised ACR, YagE family COG1723]	.	.	TMH:1	C3_01190C_A	.	75.98
B11220_Type_Strain_Japan	Clade2	sc.07	157001	289000	287362	289024	CJI97_001901	hypothetical protein	.	.	.	.	C3_01180C_B	.	47.17
B11220_Type_Strain_Japan	Clade2	sc.07	157001	289000	163386	165971	CJI97_001846	protein ARG5%2C6%2C mitochondrial	PF02774.13|Semialdhyde_dhC[Semialdehyde dehydrogenase, dimerisation domain];PF04768.8|DUF619[Protein of unknown function (DUF619)];TIGR00761[argB: acetylglutamate kinase];TIGR01850[argC: N-acetyl-gamma-glutamyl-phosphate reductase];PF00696.23|AA_kinase[Amino acid kinase family];PF01118.19|Semialdhyde_dh[Semialdehyde dehydrogenase, NAD binding domain]	EC:1.2.1.38[N-acetyl-gamma-glutamyl-phosphate reductase.];EC:2.7.2.8[Acetylglutamate kinase.]	.	.	C1_09290C_A	ARG5,6	75.36
B11220_Type_Strain_Japan	Clade2	sc.07	157001	289000	212616	215363	CJI97_001867	hypothetical protein	PF00172.13|Zn_clus[Fungal Zn(2)-Cys(6) binuclear cluster domain]	.	.	.	C1_03200C_A	ARO80	48.38
B11220_Type_Strain_Japan	Clade2	sc.07	157001	289000	245265	246929	CJI97_001885	hypothetical protein	PF00070.22|Pyr_redox[Pyridine nucleotide-disulphide oxidoreductase];PF07992.9|Pyr_redox_2[Pyridine nucleotide-disulphide oxidoreductase]	EC:1.6.99.3[NADH dehydrogenase.]	.	.	C3_03420C_A	NDE1	68.56
B11220_Type_Strain_Japan	Clade2	sc.07	157001	289000	277209	284600	CJI97_001899	hypothetical protein	PF07539.7|DRIM[Down-regulated in metastasis]	.	.	.	C3_01200W_B	UTP20	31.74
B11220_Type_Strain_Japan	Clade2	sc.07	157001	289000	259484	262393	CJI97_001890	hypothetical protein	PF07521.7|RMMBL[RNA-metabolising metallo-beta-lactamase];PF13299.1|CPSF100_C[Cleavage and polyadenylation factor 2 C-terminal];PF10996.3|Beta-Casp[Beta-Casp domain]	.	.	.	C3_03260W_A	.	39.92
B11221_South_Africa	Clade3	sc.14	4001	20000	3923	4040	CJI97_005643	5s_rRNA	.	.	.	.	.	.	.
B11221_South_Africa	Clade3	sc.14	4001	20000	9870	10220	CJI97_005644	hypothetical protein	.	.	.	.	.	.	.
B11221_South_Africa	Clade3	sc.14	4001	20000	12407	12524	CJI97_005645	5s_rRNA	.	.	.	.	.	.	.
B11221_South_Africa	Clade3	sc.14	4001	20000	18354	18704	CJI97_005646	hypothetical protein	.	.	.	.	.	.	.
B11227_South_Africa	Clade3	sc.03	97001	250000	96904	98289	CJI97_001115	hypothetical protein	PF00328.17|His_Phos_2[Histidine phosphatase superfamily (branch 2)]	.	.	.	CR_02400W_A	PHO112	56.09
B11227_South_Africa	Clade3	sc.03	97001	250000	98601	98672	CJI97_001116	tRNA-Met	.	.	.	.	.	.	.
B11227_South_Africa	Clade3	sc.03	97001	250000	102038	104059	CJI97_001117	hypothetical protein	PF07690.11|MFS_1[Major Facilitator Superfamily]	.	.	TMH:12	C2_08050C_A	SIT1	36.44
B11227_South_Africa	Clade3	sc.03	97001	250000	104627	105910	CJI97_001118	hypothetical protein	.	.	.	.	C4_06940C_A	.	34.13
B11227_South_Africa	Clade3	sc.03	97001	250000	106285	106710	CJI97_001119	hypothetical protein	.	.	.	.	CR_00160C_A	.	63.7
B11227_South_Africa	Clade3	sc.03	97001	250000	108365	109615	CJI97_001120	3-ketoacyl-CoA thiolase B%2C peroxisomal	PF02803.13|Thiolase_C[Thiolase, C-terminal domain];PF00108.18|Thiolase_N[Thiolase, N-terminal domain]	EC:2.3.1.16[Acetyl-CoA C-acyltransferase.]	ko00362[Benzoate degradation];ko00642[Ethylbenzene degradation];ko00280[Valine, leucine and isoleucine degradation];ko00281[Geraniol degradation];ko00592[alpha-Linolenic acid metabolism]	.	CR_00150C_A	POT1	73.14
B11227_South_Africa	Clade3	sc.03	97001	250000	111035	113371	CJI97_001121	hypothetical protein	PF04991.8|LicD[LicD family]	.	.	TMH:1	C2_03710W_A	MNN41	40.39
B11227_South_Africa	Clade3	sc.03	97001	250000	115404	115878	CJI97_001122	hypothetical protein	.	.	.	TMH:2	.	.	.
B11227_South_Africa	Clade3	sc.03	97001	250000	118326	119162	CJI97_001123	hypothetical protein	.	.	.	TMH:4	.	.	.
B11227_South_Africa	Clade3	sc.03	97001	250000	121940	123949	CJI97_001124	hypothetical protein	.	.	.	.	.	.	.
B11227_South_Africa	Clade3	sc.03	97001	250000	124760	126190	CJI97_001125	hypothetical protein	.	.	.	.	.	.	.
B11227_South_Africa	Clade3	sc.03	97001	250000	126513	127217	CJI97_001126	riboflavin synthase%2C alpha subunit	PF00677.12|Lum_binding[Lumazine binding domain];TIGR00187[ribE: riboflavin synthase, alpha subunit]	EC:2.5.1.9[Riboflavin synthase.]	.	.	C5_05300W_A	RIB5	72.84
B11227_South_Africa	Clade3	sc.03	97001	250000	127691	128278	CJI97_001127	hypothetical protein	PF00227.21|Proteasome[Proteasome subunit]	EC:3.4.25.1[Proteasome endopeptidase complex.]	.	.	C5_05310W_A	PRE1	76.29
B11227_South_Africa	Clade3	sc.03	97001	250000	132564	135290	CJI97_001129	hypothetical protein	PF00150.13|Cellulase[Cellulase (glycosyl hydrolase family 5)]	.	.	.	C5_05360C_A	.	55.16
B11227_South_Africa	Clade3	sc.03	97001	250000	135352	136743	CJI97_001130	hypothetical protein	PF01896.14|DNA_primase_S[Eukaryotic and archaeal DNA primase small subunit];TIGR00335[primase_sml: putative DNA primase, eukaryotic-type, small subunit]	EC:2.7.7.-[Nucleotidyltransferases.]	ko03030[DNA replication];ko00240[Pyrimidine metabolism]	.	C5_05350W_A	.	66.06
B11227_South_Africa	Clade3	sc.03	97001	250000	137515	138771	CJI97_001131	hypothetical protein	PF00400.27|WD40[WD domain, G-beta repeat]	.	.	.	C5_05340W_A	.	69.21
B11227_South_Africa	Clade3	sc.03	97001	250000	139459	139758	CJI97_001132	hypothetical protein	.	.	.	.	.	.	.
B11227_South_Africa	Clade3	sc.03	97001	250000	139897	141069	CJI97_001133	KRR1 small subunit processome component	.	.	.	.	C1_11420W_A	KRR1	83.23
B11227_South_Africa	Clade3	sc.03	97001	250000	142142	143716	CJI97_001134	hypothetical protein	.	.	.	.	.	.	.
B11227_South_Africa	Clade3	sc.03	97001	250000	143737	146952	CJI97_001135	hypothetical protein	PF09444.5|MRC1[MRC1-like domain]	.	.	.	C1_11440C_A	GIN1	35.36
B11227_South_Africa	Clade3	sc.03	97001	250000	149756	151411	CJI97_001136	hypothetical protein	.	.	.	.	.	.	.
B11227_South_Africa	Clade3	sc.03	97001	250000	152878	154026	CJI97_001137	S-adenosylmethionine synthase	TIGR01034[metK: methionine adenosyltransferase];PF00438.15|S-AdoMet_synt_N[S-adenosylmethionine synthetase, N-terminal domain];PF02773.11|S-AdoMet_synt_C[S-adenosylmethionine synthetase, C-terminal domain];PF02772.11|S-AdoMet_synt_M[S-adenosylmethionine synthetase, central domain]	EC:2.5.1.6[Methionine adenosyltransferase.]	.	.	C1_11450C_A	SAM2	89.74
B11227_South_Africa	Clade3	sc.03	97001	250000	154729	155355	CJI97_001138	hypothetical protein	.	.	.	.	.	.	.
B11227_South_Africa	Clade3	sc.03	97001	250000	155581	156291	CJI97_001139	hypothetical protein	PF01569.16|PAP2[PAP2 superfamily]	.	.	TMH:5	C1_11470C_A	DPP1	49.36
B11227_South_Africa	Clade3	sc.03	97001	250000	157822	159483	CJI97_001140	phosphate:H+ symporter	TIGR00887[2A0109: phosphate:H+ symporter];PF07690.11|MFS_1[Major Facilitator Superfamily];PF00083.19|Sugar_tr[Sugar (and other) transporter]	.	.	TMH:7	C1_11480W_A	PHO84	74.72
B11227_South_Africa	Clade3	sc.03	97001	250000	167846	169222	CJI97_001142	hypothetical protein	PF00134.18|Cyclin_N[Cyclin, N-terminal domain];PF02984.14|Cyclin_C[Cyclin, C-terminal domain]	.	.	.	C5_01680C_A	CCN1	63.36
B11227_South_Africa	Clade3	sc.03	97001	250000	170707	172332	CJI97_001143	T-complex protein 1 subunit eta	PF00118.19|Cpn60_TCP1[TCP-1/cpn60 chaperonin family];TIGR02345[chap_CCT_eta: T-complex protein 1, eta subunit]	.	.	.	C5_01690C_A	CCT7	76.32
B11227_South_Africa	Clade3	sc.03	97001	250000	172997	173485	CJI97_001144	hypothetical protein	.	.	.	.	C5_01700W_A	.	47.31
B11227_South_Africa	Clade3	sc.03	97001	250000	173589	175130	CJI97_001145	hypothetical protein	.	.	.	.	.	.	.
B11227_South_Africa	Clade3	sc.03	97001	250000	175807	178035	CJI97_001146	hypothetical protein	PF01391.13|Collagen[Collagen triple helix repeat (20 copies)];PF10182.4|Flo11[Flo11 domain]	.	.	.	.	.	.
B11227_South_Africa	Clade3	sc.03	97001	250000	183683	186118	CJI97_001147	hypothetical protein	PF07393.6|Sec10[Exocyst complex component Sec10]	.	.	.	C5_01720C_A	RCY1	49.3
B11227_South_Africa	Clade3	sc.03	97001	250000	186929	189259	CJI97_001148	hypothetical protein	.	.	.	.	.	.	.
B11227_South_Africa	Clade3	sc.03	97001	250000	189357	191045	CJI97_001149	Poly(A) polymerase PAPalpha	PF04928.12|PAP_central[Poly(A) polymerase central domain];PF01909.18|NTP_transf_2[Nucleotidyltransferase domain];PF04926.10|PAP_RNA-bind[Poly(A) polymerase predicted RNA binding domain]	EC:2.7.7.19[Polynucleotide adenylyltransferase.]	.	.	C5_01745W_B	PAPALPHA	70.64
B11227_South_Africa	Clade3	sc.03	97001	250000	191653	194448	CJI97_001150	hypothetical protein	PF00454.22|PI3_PI4_kinase[Phosphatidylinositol 3- and 4-kinase];PF11522.3|Pik1[Yeast phosphatidylinositol-4-OH kinase Pik1]	EC:2.7.1.67[1-phosphatidylinositol 4-kinase.]	ko04070[Phosphatidylinositol signaling system]	.	C5_01765C_B	PIKALPHA	56.37
B11227_South_Africa	Clade3	sc.03	97001	250000	194620	195813	CJI97_001151	hypothetical protein	PF01237.13|Oxysterol_BP[Oxysterol-binding protein]	.	.	.	C5_01770C_A	OBPA	64.52
B11227_South_Africa	Clade3	sc.03	97001	250000	199142	200443	CJI97_001153	hypothetical protein	.	EC:2.1.1.-[Methyltransferases.]	ko00350[Tyrosine metabolism];ko00624[Polycyclic aromatic hydrocarbon degradation]	.	C5_00680W_A	RMT2	52.56
B11227_South_Africa	Clade3	sc.03	97001	250000	202454	204736	CJI97_001154	hypothetical protein	PF08022.7|FAD_binding_8[FAD-binding domain];PF08030.7|NAD_binding_6[Ferric reductase NAD binding domain];PF01794.14|Ferric_reduct[Ferric reductase like transmembrane component]	.	.	TMH:8	C5_01360W_A	CFL4	42.84
B11227_South_Africa	Clade3	sc.03	97001	250000	206293	207363	CJI97_001155	hypothetical protein	PF00010.21|HLH[Helix-loop-helix DNA-binding domain]	.	.	.	C5_00670C_A	HMS1	63.75
B11227_South_Africa	Clade3	sc.03	97001	250000	208069	209643	CJI97_001156	lanosterol 14-alpha demethylase	PF00067.17|p450[Cytochrome P450]	EC:1.14.13.70[Sterol 14-demethylase.]	.	TMH:2	C5_00660C_A	ERG11	70
B11227_South_Africa	Clade3	sc.03	97001	250000	209796	210851	CJI97_001157	homoserine kinase	PF00288.21|GHMP_kinases_N[GHMP kinases N terminal domain];PF08544.8|GHMP_kinases_C[GHMP kinases C terminal];TIGR00191[thrB: homoserine kinase]	EC:2.7.1.39[Homoserine kinase.]	.	.	C5_00650C_A	THR1	67.81
B11227_South_Africa	Clade3	sc.03	97001	250000	211163	212590	CJI97_001158	hypothetical protein	PF01103.18|Bac_surface_Ag[Surface antigen]	.	.	.	C5_00640C_A	SAM51	40.84
B11227_South_Africa	Clade3	sc.03	97001	250000	214303	214662	CJI97_001160	hypothetical protein	PF05129.8|Elf1[Transcription elongation factor Elf1 like]	.	.	.	CR_05910W_A	.	71.68
B11227_South_Africa	Clade3	sc.03	97001	250000	214772	218461	CJI97_001161	hypothetical protein	PF13516.1|LRR_6[Leucine Rich repeat]	.	.	.	CR_05920C_A	MHP1	45.44
B11227_South_Africa	Clade3	sc.03	97001	250000	219213	220889	CJI97_001162	hypothetical protein	PF02881.14|SRP54_N[SRP54-type protein, helical bundle domain];PF00448.17|SRP54[SRP54-type protein, GTPase domain];TIGR01425[SRP54_euk: signal recognition particle protein SRP54];PF02978.14|SRP_SPB[Signal peptide binding domain];PF02492.14|cobW[CobW/HypB/UreG, nucleotide-binding domain]	.	ko03070[Bacterial secretion system]	.	CR_01110W_A	SRP54	77.5
B11227_South_Africa	Clade3	sc.03	97001	250000	222389	222931	CJI97_001163	hypothetical protein	.	.	.	.	.	.	.
B11227_South_Africa	Clade3	sc.03	97001	250000	225375	226106	CJI97_001164	hypothetical protein	.	.	.	.	.	.	.
B11227_South_Africa	Clade3	sc.03	97001	250000	227085	227645	CJI97_001165	hypothetical protein	PF00013.24|KH_1[KH domain];PF13014.1|KH_3[KH domain]	.	.	.	C6_03380W_A	.	75.47
B11227_South_Africa	Clade3	sc.03	97001	250000	229736	231958	CJI97_001167	hypothetical protein	PF08728.5|CRT10[CRT10]	.	.	.	C6_02790C_A	.	29.45
B11227_South_Africa	Clade3	sc.03	97001	250000	232098	233549	CJI97_001168	hypothetical protein	PF11699.3|CENP-C_C[Mif2/CENP-C like];PF15624.1|Mif2_N[Kinetochore CENP-C fungal homologue, Mif2, N-terminal]	.	.	.	C6_02780C_A	MIF2	33.47
B11227_South_Africa	Clade3	sc.03	97001	250000	233600	234304	CJI97_001169	hypothetical protein	PF00466.15|Ribosomal_L10[Ribosomal protein L10]	.	.	.	C6_02770W_A	MRT4	64.44
B11227_South_Africa	Clade3	sc.03	97001	250000	235277	235600	CJI97_001170	hypothetical protein	PF13232.1|Complex1_LYR_1[Complex1_LYR-like];PF05347.10|Complex1_LYR[Complex 1 protein (LYR family)]	EC:1.6.99.3[NADH dehydrogenase.];EC:1.6.5.3[NADH:ubiquinone reductase (H(+)-translocating).]	ko05016[Huntington's disease];ko05010[Alzheimer's disease];ko05012[Parkinson's disease]	.	C6_02740W_A	.	71.03
B11227_South_Africa	Clade3	sc.03	97001	250000	235742	237667	CJI97_001171	fimbrin	PF00307.26|CH[Calponin homology (CH) domain]	.	.	.	C6_02730W_A	SAC6	79.45
B11227_South_Africa	Clade3	sc.03	97001	250000	238407	241412	CJI97_001172	hypothetical protein	PF10367.4|Vps39_2[Vacuolar sorting protein 39 domain 2];PF05131.9|Pep3_Vps18[Pep3/Vps18/deep orange family]	.	.	.	C6_02720C_A	.	29.76
B11227_South_Africa	Clade3	sc.03	97001	250000	242028	244421	CJI97_001173	ribosomal RNA large subunit methyltransferase J	PF11861.3|DUF3381[Domain of unknown function (DUF3381)];PF07780.7|Spb1_C[Spb1 C-terminal domain];PF01728.14|FtsJ[FtsJ-like methyltransferase]	EC:2.1.1.-[Methyltransferases.]	.	.	C6_04160C_A	SPB1	60.45
B11227_South_Africa	Clade3	sc.03	97001	250000	246447	246867	CJI97_001175	cytochrome b-c1 complex subunit 7	PF02271.11|UCR_14kD[Ubiquinol-cytochrome C reductase complex 14kD subunit]	EC:1.10.2.2[Ubiquinol--cytochrome-c reductase.]	ko05016[Huntington's disease];ko04260[Cardiac muscle contraction];ko05010[Alzheimer's disease];ko05012[Parkinson's disease]	.	C6_03400C_A	QCR7	71.31
B11227_South_Africa	Clade3	sc.03	97001	250000	246939	247889	CJI97_001176	hypothetical protein	PF00153.22|Mito_carr[Mitochondrial carrier protein]	.	.	.	C6_03390W_A	.	71.84
B11227_South_Africa	Clade3	sc.03	97001	250000	248387	251485	CJI97_001177	hypothetical protein	PF01608.12|I_LWEQ[I/LWEQ domain];PF07651.11|ANTH[ANTH domain]	.	.	.	C7_03810W_A	SLA2	57.94
B11227_South_Africa	Clade3	sc.03	97001	250000	160562	166231	CJI97_001141	hypothetical protein	PF00063.16|Myosin_head[Myosin head (motor domain)]	.	ko05416[Viral myocarditis]	.	C5_01650C_A	MYO1	47.03
B11227_South_Africa	Clade3	sc.03	97001	250000	196485	197966	CJI97_001152	hypothetical protein	PF00675.15|Peptidase_M16[Insulinase (Peptidase family M16)];PF05193.16|Peptidase_M16_C[Peptidase M16 inactive domain]	EC:3.4.24.64[Mitochondrial processing peptidase.]	.	.	C5_01640W_A	MAS2	53.97
B11227_South_Africa	Clade3	sc.03	97001	250000	212735	214189	CJI97_001159	hypothetical protein	PF00566.13|RabGAP-TBC[Rab-GTPase-TBC domain]	.	.	.	CR_05900W_A	.	45.83
B11227_South_Africa	Clade3	sc.03	97001	250000	228782	229555	CJI97_001166	hypothetical protein	.	.	.	.	.	.	.
B11227_South_Africa	Clade3	sc.03	97001	250000	245279	246193	CJI97_001174	hypothetical protein	PF09830.4|ATP_transf[ATP adenylyltransferase]	EC:2.7.7.53[ATP adenylyltransferase.]	.	.	C6_03410C_A	APA2	39.54
B11227_South_Africa	Clade3	sc.03	97001	250000	128827	132147	CJI97_001128	hypothetical protein	PF00271.26|Helicase_C[Helicase conserved C-terminal domain];PF00575.18|S1[S1 RNA binding domain];PF04408.18|HA2[Helicase associated domain (HA2)];PF00270.24|DEAD[DEAD/DEAH box helicase];PF07717.11|OB_NTP_bind[Oligonucleotide/oligosaccharide-binding (OB)-fold]	EC:3.6.4.13[RNA helicase.]	.	.	C5_05370C_A	PRP22	61.01
B11227_South_Africa	Clade3	sc.14	2001	20000	3923	4040	CJI97_005643	5s_rRNA	.	.	.	.	.	.	.
B11227_South_Africa	Clade3	sc.14	2001	20000	9870	10220	CJI97_005644	hypothetical protein	.	.	.	.	.	.	.
B11227_South_Africa	Clade3	sc.14	2001	20000	12407	12524	CJI97_005645	5s_rRNA	.	.	.	.	.	.	.
B11227_South_Africa	Clade3	sc.14	2001	20000	18354	18704	CJI97_005646	hypothetical protein	.	.	.	.	.	.	.
B11229_South_Africa	Clade3	sc.03	97001	250000	96904	98289	CJI97_001115	hypothetical protein	PF00328.17|His_Phos_2[Histidine phosphatase superfamily (branch 2)]	.	.	.	CR_02400W_A	PHO112	56.09
B11229_South_Africa	Clade3	sc.03	97001	250000	98601	98672	CJI97_001116	tRNA-Met	.	.	.	.	.	.	.
B11229_South_Africa	Clade3	sc.03	97001	250000	102038	104059	CJI97_001117	hypothetical protein	PF07690.11|MFS_1[Major Facilitator Superfamily]	.	.	TMH:12	C2_08050C_A	SIT1	36.44
B11229_South_Africa	Clade3	sc.03	97001	250000	104627	105910	CJI97_001118	hypothetical protein	.	.	.	.	C4_06940C_A	.	34.13
B11229_South_Africa	Clade3	sc.03	97001	250000	106285	106710	CJI97_001119	hypothetical protein	.	.	.	.	CR_00160C_A	.	63.7
B11229_South_Africa	Clade3	sc.03	97001	250000	108365	109615	CJI97_001120	3-ketoacyl-CoA thiolase B%2C peroxisomal	PF02803.13|Thiolase_C[Thiolase, C-terminal domain];PF00108.18|Thiolase_N[Thiolase, N-terminal domain]	EC:2.3.1.16[Acetyl-CoA C-acyltransferase.]	ko00362[Benzoate degradation];ko00642[Ethylbenzene degradation];ko00280[Valine, leucine and isoleucine degradation];ko00281[Geraniol degradation];ko00592[alpha-Linolenic acid metabolism]	.	CR_00150C_A	POT1	73.14
B11229_South_Africa	Clade3	sc.03	97001	250000	111035	113371	CJI97_001121	hypothetical protein	PF04991.8|LicD[LicD family]	.	.	TMH:1	C2_03710W_A	MNN41	40.39
B11229_South_Africa	Clade3	sc.03	97001	250000	115404	115878	CJI97_001122	hypothetical protein	.	.	.	TMH:2	.	.	.
B11229_South_Africa	Clade3	sc.03	97001	250000	118326	119162	CJI97_001123	hypothetical protein	.	.	.	TMH:4	.	.	.
B11229_South_Africa	Clade3	sc.03	97001	250000	121940	123949	CJI97_001124	hypothetical protein	.	.	.	.	.	.	.
B11229_South_Africa	Clade3	sc.03	97001	250000	124760	126190	CJI97_001125	hypothetical protein	.	.	.	.	.	.	.
B11229_South_Africa	Clade3	sc.03	97001	250000	126513	127217	CJI97_001126	riboflavin synthase%2C alpha subunit	PF00677.12|Lum_binding[Lumazine binding domain];TIGR00187[ribE: riboflavin synthase, alpha subunit]	EC:2.5.1.9[Riboflavin synthase.]	.	.	C5_05300W_A	RIB5	72.84
B11229_South_Africa	Clade3	sc.03	97001	250000	127691	128278	CJI97_001127	hypothetical protein	PF00227.21|Proteasome[Proteasome subunit]	EC:3.4.25.1[Proteasome endopeptidase complex.]	.	.	C5_05310W_A	PRE1	76.29
B11229_South_Africa	Clade3	sc.03	97001	250000	132564	135290	CJI97_001129	hypothetical protein	PF00150.13|Cellulase[Cellulase (glycosyl hydrolase family 5)]	.	.	.	C5_05360C_A	.	55.16
B11229_South_Africa	Clade3	sc.03	97001	250000	135352	136743	CJI97_001130	hypothetical protein	PF01896.14|DNA_primase_S[Eukaryotic and archaeal DNA primase small subunit];TIGR00335[primase_sml: putative DNA primase, eukaryotic-type, small subunit]	EC:2.7.7.-[Nucleotidyltransferases.]	ko03030[DNA replication];ko00240[Pyrimidine metabolism]	.	C5_05350W_A	.	66.06
B11229_South_Africa	Clade3	sc.03	97001	250000	137515	138771	CJI97_001131	hypothetical protein	PF00400.27|WD40[WD domain, G-beta repeat]	.	.	.	C5_05340W_A	.	69.21
B11229_South_Africa	Clade3	sc.03	97001	250000	139459	139758	CJI97_001132	hypothetical protein	.	.	.	.	.	.	.
B11229_South_Africa	Clade3	sc.03	97001	250000	139897	141069	CJI97_001133	KRR1 small subunit processome component	.	.	.	.	C1_11420W_A	KRR1	83.23
B11229_South_Africa	Clade3	sc.03	97001	250000	142142	143716	CJI97_001134	hypothetical protein	.	.	.	.	.	.	.
B11229_South_Africa	Clade3	sc.03	97001	250000	143737	146952	CJI97_001135	hypothetical protein	PF09444.5|MRC1[MRC1-like domain]	.	.	.	C1_11440C_A	GIN1	35.36
B11229_South_Africa	Clade3	sc.03	97001	250000	149756	151411	CJI97_001136	hypothetical protein	.	.	.	.	.	.	.
B11229_South_Africa	Clade3	sc.03	97001	250000	152878	154026	CJI97_001137	S-adenosylmethionine synthase	TIGR01034[metK: methionine adenosyltransferase];PF00438.15|S-AdoMet_synt_N[S-adenosylmethionine synthetase, N-terminal domain];PF02773.11|S-AdoMet_synt_C[S-adenosylmethionine synthetase, C-terminal domain];PF02772.11|S-AdoMet_synt_M[S-adenosylmethionine synthetase, central domain]	EC:2.5.1.6[Methionine adenosyltransferase.]	.	.	C1_11450C_A	SAM2	89.74
B11229_South_Africa	Clade3	sc.03	97001	250000	154729	155355	CJI97_001138	hypothetical protein	.	.	.	.	.	.	.
B11229_South_Africa	Clade3	sc.03	97001	250000	155581	156291	CJI97_001139	hypothetical protein	PF01569.16|PAP2[PAP2 superfamily]	.	.	TMH:5	C1_11470C_A	DPP1	49.36
B11229_South_Africa	Clade3	sc.03	97001	250000	157822	159483	CJI97_001140	phosphate:H+ symporter	TIGR00887[2A0109: phosphate:H+ symporter];PF07690.11|MFS_1[Major Facilitator Superfamily];PF00083.19|Sugar_tr[Sugar (and other) transporter]	.	.	TMH:7	C1_11480W_A	PHO84	74.72
B11229_South_Africa	Clade3	sc.03	97001	250000	167846	169222	CJI97_001142	hypothetical protein	PF00134.18|Cyclin_N[Cyclin, N-terminal domain];PF02984.14|Cyclin_C[Cyclin, C-terminal domain]	.	.	.	C5_01680C_A	CCN1	63.36
B11229_South_Africa	Clade3	sc.03	97001	250000	170707	172332	CJI97_001143	T-complex protein 1 subunit eta	PF00118.19|Cpn60_TCP1[TCP-1/cpn60 chaperonin family];TIGR02345[chap_CCT_eta: T-complex protein 1, eta subunit]	.	.	.	C5_01690C_A	CCT7	76.32
B11229_South_Africa	Clade3	sc.03	97001	250000	172997	173485	CJI97_001144	hypothetical protein	.	.	.	.	C5_01700W_A	.	47.31
B11229_South_Africa	Clade3	sc.03	97001	250000	173589	175130	CJI97_001145	hypothetical protein	.	.	.	.	.	.	.
B11229_South_Africa	Clade3	sc.03	97001	250000	175807	178035	CJI97_001146	hypothetical protein	PF01391.13|Collagen[Collagen triple helix repeat (20 copies)];PF10182.4|Flo11[Flo11 domain]	.	.	.	.	.	.
B11229_South_Africa	Clade3	sc.03	97001	250000	183683	186118	CJI97_001147	hypothetical protein	PF07393.6|Sec10[Exocyst complex component Sec10]	.	.	.	C5_01720C_A	RCY1	49.3
B11229_South_Africa	Clade3	sc.03	97001	250000	186929	189259	CJI97_001148	hypothetical protein	.	.	.	.	.	.	.
B11229_South_Africa	Clade3	sc.03	97001	250000	189357	191045	CJI97_001149	Poly(A) polymerase PAPalpha	PF04928.12|PAP_central[Poly(A) polymerase central domain];PF01909.18|NTP_transf_2[Nucleotidyltransferase domain];PF04926.10|PAP_RNA-bind[Poly(A) polymerase predicted RNA binding domain]	EC:2.7.7.19[Polynucleotide adenylyltransferase.]	.	.	C5_01745W_B	PAPALPHA	70.64
B11229_South_Africa	Clade3	sc.03	97001	250000	191653	194448	CJI97_001150	hypothetical protein	PF00454.22|PI3_PI4_kinase[Phosphatidylinositol 3- and 4-kinase];PF11522.3|Pik1[Yeast phosphatidylinositol-4-OH kinase Pik1]	EC:2.7.1.67[1-phosphatidylinositol 4-kinase.]	ko04070[Phosphatidylinositol signaling system]	.	C5_01765C_B	PIKALPHA	56.37
B11229_South_Africa	Clade3	sc.03	97001	250000	194620	195813	CJI97_001151	hypothetical protein	PF01237.13|Oxysterol_BP[Oxysterol-binding protein]	.	.	.	C5_01770C_A	OBPA	64.52
B11229_South_Africa	Clade3	sc.03	97001	250000	199142	200443	CJI97_001153	hypothetical protein	.	EC:2.1.1.-[Methyltransferases.]	ko00350[Tyrosine metabolism];ko00624[Polycyclic aromatic hydrocarbon degradation]	.	C5_00680W_A	RMT2	52.56
B11229_South_Africa	Clade3	sc.03	97001	250000	202454	204736	CJI97_001154	hypothetical protein	PF08022.7|FAD_binding_8[FAD-binding domain];PF08030.7|NAD_binding_6[Ferric reductase NAD binding domain];PF01794.14|Ferric_reduct[Ferric reductase like transmembrane component]	.	.	TMH:8	C5_01360W_A	CFL4	42.84
B11229_South_Africa	Clade3	sc.03	97001	250000	206293	207363	CJI97_001155	hypothetical protein	PF00010.21|HLH[Helix-loop-helix DNA-binding domain]	.	.	.	C5_00670C_A	HMS1	63.75
B11229_South_Africa	Clade3	sc.03	97001	250000	208069	209643	CJI97_001156	lanosterol 14-alpha demethylase	PF00067.17|p450[Cytochrome P450]	EC:1.14.13.70[Sterol 14-demethylase.]	.	TMH:2	C5_00660C_A	ERG11	70
B11229_South_Africa	Clade3	sc.03	97001	250000	209796	210851	CJI97_001157	homoserine kinase	PF00288.21|GHMP_kinases_N[GHMP kinases N terminal domain];PF08544.8|GHMP_kinases_C[GHMP kinases C terminal];TIGR00191[thrB: homoserine kinase]	EC:2.7.1.39[Homoserine kinase.]	.	.	C5_00650C_A	THR1	67.81
B11229_South_Africa	Clade3	sc.03	97001	250000	211163	212590	CJI97_001158	hypothetical protein	PF01103.18|Bac_surface_Ag[Surface antigen]	.	.	.	C5_00640C_A	SAM51	40.84
B11229_South_Africa	Clade3	sc.03	97001	250000	214303	214662	CJI97_001160	hypothetical protein	PF05129.8|Elf1[Transcription elongation factor Elf1 like]	.	.	.	CR_05910W_A	.	71.68
B11229_South_Africa	Clade3	sc.03	97001	250000	214772	218461	CJI97_001161	hypothetical protein	PF13516.1|LRR_6[Leucine Rich repeat]	.	.	.	CR_05920C_A	MHP1	45.44
B11229_South_Africa	Clade3	sc.03	97001	250000	219213	220889	CJI97_001162	hypothetical protein	PF02881.14|SRP54_N[SRP54-type protein, helical bundle domain];PF00448.17|SRP54[SRP54-type protein, GTPase domain];TIGR01425[SRP54_euk: signal recognition particle protein SRP54];PF02978.14|SRP_SPB[Signal peptide binding domain];PF02492.14|cobW[CobW/HypB/UreG, nucleotide-binding domain]	.	ko03070[Bacterial secretion system]	.	CR_01110W_A	SRP54	77.5
B11229_South_Africa	Clade3	sc.03	97001	250000	222389	222931	CJI97_001163	hypothetical protein	.	.	.	.	.	.	.
B11229_South_Africa	Clade3	sc.03	97001	250000	225375	226106	CJI97_001164	hypothetical protein	.	.	.	.	.	.	.
B11229_South_Africa	Clade3	sc.03	97001	250000	227085	227645	CJI97_001165	hypothetical protein	PF00013.24|KH_1[KH domain];PF13014.1|KH_3[KH domain]	.	.	.	C6_03380W_A	.	75.47
B11229_South_Africa	Clade3	sc.03	97001	250000	229736	231958	CJI97_001167	hypothetical protein	PF08728.5|CRT10[CRT10]	.	.	.	C6_02790C_A	.	29.45
B11229_South_Africa	Clade3	sc.03	97001	250000	232098	233549	CJI97_001168	hypothetical protein	PF11699.3|CENP-C_C[Mif2/CENP-C like];PF15624.1|Mif2_N[Kinetochore CENP-C fungal homologue, Mif2, N-terminal]	.	.	.	C6_02780C_A	MIF2	33.47
B11229_South_Africa	Clade3	sc.03	97001	250000	233600	234304	CJI97_001169	hypothetical protein	PF00466.15|Ribosomal_L10[Ribosomal protein L10]	.	.	.	C6_02770W_A	MRT4	64.44
B11229_South_Africa	Clade3	sc.03	97001	250000	235277	235600	CJI97_001170	hypothetical protein	PF13232.1|Complex1_LYR_1[Complex1_LYR-like];PF05347.10|Complex1_LYR[Complex 1 protein (LYR family)]	EC:1.6.99.3[NADH dehydrogenase.];EC:1.6.5.3[NADH:ubiquinone reductase (H(+)-translocating).]	ko05016[Huntington's disease];ko05010[Alzheimer's disease];ko05012[Parkinson's disease]	.	C6_02740W_A	.	71.03
B11229_South_Africa	Clade3	sc.03	97001	250000	235742	237667	CJI97_001171	fimbrin	PF00307.26|CH[Calponin homology (CH) domain]	.	.	.	C6_02730W_A	SAC6	79.45
B11229_South_Africa	Clade3	sc.03	97001	250000	238407	241412	CJI97_001172	hypothetical protein	PF10367.4|Vps39_2[Vacuolar sorting protein 39 domain 2];PF05131.9|Pep3_Vps18[Pep3/Vps18/deep orange family]	.	.	.	C6_02720C_A	.	29.76
B11229_South_Africa	Clade3	sc.03	97001	250000	242028	244421	CJI97_001173	ribosomal RNA large subunit methyltransferase J	PF11861.3|DUF3381[Domain of unknown function (DUF3381)];PF07780.7|Spb1_C[Spb1 C-terminal domain];PF01728.14|FtsJ[FtsJ-like methyltransferase]	EC:2.1.1.-[Methyltransferases.]	.	.	C6_04160C_A	SPB1	60.45
B11229_South_Africa	Clade3	sc.03	97001	250000	246447	246867	CJI97_001175	cytochrome b-c1 complex subunit 7	PF02271.11|UCR_14kD[Ubiquinol-cytochrome C reductase complex 14kD subunit]	EC:1.10.2.2[Ubiquinol--cytochrome-c reductase.]	ko05016[Huntington's disease];ko04260[Cardiac muscle contraction];ko05010[Alzheimer's disease];ko05012[Parkinson's disease]	.	C6_03400C_A	QCR7	71.31
B11229_South_Africa	Clade3	sc.03	97001	250000	246939	247889	CJI97_001176	hypothetical protein	PF00153.22|Mito_carr[Mitochondrial carrier protein]	.	.	.	C6_03390W_A	.	71.84
B11229_South_Africa	Clade3	sc.03	97001	250000	248387	251485	CJI97_001177	hypothetical protein	PF01608.12|I_LWEQ[I/LWEQ domain];PF07651.11|ANTH[ANTH domain]	.	.	.	C7_03810W_A	SLA2	57.94
B11229_South_Africa	Clade3	sc.03	97001	250000	160562	166231	CJI97_001141	hypothetical protein	PF00063.16|Myosin_head[Myosin head (motor domain)]	.	ko05416[Viral myocarditis]	.	C5_01650C_A	MYO1	47.03
B11229_South_Africa	Clade3	sc.03	97001	250000	196485	197966	CJI97_001152	hypothetical protein	PF00675.15|Peptidase_M16[Insulinase (Peptidase family M16)];PF05193.16|Peptidase_M16_C[Peptidase M16 inactive domain]	EC:3.4.24.64[Mitochondrial processing peptidase.]	.	.	C5_01640W_A	MAS2	53.97
B11229_South_Africa	Clade3	sc.03	97001	250000	212735	214189	CJI97_001159	hypothetical protein	PF00566.13|RabGAP-TBC[Rab-GTPase-TBC domain]	.	.	.	CR_05900W_A	.	45.83
B11229_South_Africa	Clade3	sc.03	97001	250000	228782	229555	CJI97_001166	hypothetical protein	.	.	.	.	.	.	.
B11229_South_Africa	Clade3	sc.03	97001	250000	245279	246193	CJI97_001174	hypothetical protein	PF09830.4|ATP_transf[ATP adenylyltransferase]	EC:2.7.7.53[ATP adenylyltransferase.]	.	.	C6_03410C_A	APA2	39.54
B11229_South_Africa	Clade3	sc.03	97001	250000	128827	132147	CJI97_001128	hypothetical protein	PF00271.26|Helicase_C[Helicase conserved C-terminal domain];PF00575.18|S1[S1 RNA binding domain];PF04408.18|HA2[Helicase associated domain (HA2)];PF00270.24|DEAD[DEAD/DEAH box helicase];PF07717.11|OB_NTP_bind[Oligonucleotide/oligosaccharide-binding (OB)-fold]	EC:3.6.4.13[RNA helicase.]	.	.	C5_05370C_A	PRP22	61.01
													.	.	.
