# Supplementary material for: Genomic insights into multidrug-resistance, mating and virulence in Candida auris and related emerging species
Source: Nat Commun. 2018 Dec 17;9:5346. doi: 10.1038/s41467-018-07779-6 (PMC6297351; doi:10.1038/s41467-018-07779-6)
Supplement: Supplementary file 7 — Supplementary Data 5 [file 41467_2018_7779_MOESM7_ESM.xlsx]

## Sheet: Data5. Conservation drug R
Supplementary data5. Gene copy number variation and conservation in ERG11 and genes associated with drug resistance
		Gene	ERG11	TAC1	TAC1	UPC2	MDR1	CDR1	CDR4	SNQ2	CDR4	SNQ2
Isolate	Clade	Locus ID	CJI97_001156	CJI97_004633	CJI97_004632	CJI97_000271	CJI97_004042	CJI97_000167	CJI97_000479	CJI97_001481	CJI97_001995	CJI97_004516
B11101_Pakistan	Clade1		0.963442	0.869244	1.03328	1.0376	0.982942	1.05055	1.13497	0.922909	1.02439	1.00699
B11102_Pakistan	Clade1		0.981115	0.86104	1.02836	1.00346	0.988181	1.07502	1.1758	0.935794	1.08773	0.993665
B11103_Pakistan	Clade1		1.06592	0.84612	0.951206	1.04425	0.930149	1.0537	1.15266	0.905488	1.03689	0.976439
B11104_Pakistan	Clade1		0.970246	0.967068	0.968899	0.9201	0.96665	1.04132	1.16684	0.911983	1.06326	1.03312
B11105_Pakistan	Clade1		0.995823	0.914042	0.989786	1.09019	1.0467	1.13493	1.13494	0.912998	1.01591	0.992587
B11112_Pakistan	Clade1		0.928137	0.982952	0.963591	0.963465	1.01156	1.09303	1.14894	0.933874	1.02655	0.971084
B11113_Pakistan	Clade1		1.042	0.893079	0.95718	1.00642	0.996674	1.08688	1.21935	0.904584	0.995302	0.927706
B11114_Pakistan	Clade1		1.04048	0.962248	0.963392	0.931474	1.0347	1.02023	1.17029	0.895192	1.02364	0.93991
B11115_Pakistan	Clade1		1.00739	0.908124	0.946711	0.974759	1.02053	1.04299	1.15726	0.894135	1.01482	1.01542
B11116_Pakistan	Clade1		0.953654	0.869655	0.962135	0.97639	1.00968	1.10045	1.18442	0.954214	0.986463	0.924029
B11117_Pakistan	Clade1		1.01462	0.894045	0.994462	0.988295	0.97947	1.06824	1.09842	0.903033	1.04828	1.01745
B11118_Pakistan	Clade1		1.03837	1.01782	1.01971	0.965883	1.00956	1.04231	1.06192	0.897548	1.0473	1.01084
B11119_Pakistan	Clade1		0.935165	0.970124	0.982805	0.993104	1.07458	1.07778	1.08386	0.87803	1.04893	0.987928
B11200_India	Clade1		0.977734	0.905123	0.98755	0.967433	1.03021	1.13144	1.09442	0.905752	1.01626	0.981033
B11201_India	Clade1		1.00532	0.934498	1.00871	1.00301	1.01669	1.09965	1.10758	0.90788	1.06444	1.02008
B11205_India	Clade1		0.920398	0.946557	0.972115	1.05328	0.992703	1.07495	1.05586	0.906855	1.00277	0.987246
B11206_India	Clade1		1.80521	0.891921	0.964909	1.00395	0.982231	1.05583	1.15677	0.968078	1.02497	0.922788
B11207_India	Clade1		0.981526	0.969034	1.01326	1.04618	1.00558	1.04422	1.12701	0.952779	1.04382	1.01972
B11208_India	Clade1		0.925121	0.956155	0.994585	1.0712	1.00025	1.07855	1.1	0.881578	1.07134	1.02779
B11209_India	Clade1		0.990426	0.919833	0.999584	1.03055	1.00353	1.08408	1.09557	0.883214	1.0454	0.992308
B11210_India	Clade1		1.03612	0.950769	0.995923	1.04753	0.989289	1.05415	1.13928	0.965793	1.08857	1.10094
B11212_India	Clade1		0.971556	0.94085	1.04265	0.996571	0.933452	1.07347	1.17121	0.874556	1.06093	0.999377
B11213_India	Clade1		0.996628	0.921061	1.03366	1.03778	1.06091	1.0859	1.15062	0.880505	1.04464	0.989342
B11214_India	Clade1		0.99406	0.890265	0.96988	1.04598	0.97119	1.07766	1.14316	0.928067	1.06237	0.970356
B11215_India	Clade1		1.01981	0.89402	0.952682	1.03866	0.9225	1.05897	1.16794	0.929518	1.05026	0.937926
B11216_India	Clade1		0.986276	0.898477	0.951638	1.01546	1.01582	1.02309	1.22168	0.902582	1.03835	0.965128
B11217_India	Clade1		0.814357	0.864089	0.997491	1.01779	0.914911	1.03189	1.11605	0.8625	0.987027	0.976455
B11218_India	Clade1		0.968942	0.938526	1.00956	0.993325	0.963707	1.06452	1.13757	0.87922	1.03948	1.00272
B11219_India	Clade1		0.946053	0.95857	1.00122	0.989864	0.97287	1.06768	1.09087	0.902112	1.01836	0.990325
B11096_Pakistan	Clade1		1.03099	0.896544	1.00882	0.967854	0.968711	1.14317	1.16256	0.902326	1.02374	0.958024
B11097_Pakistan	Clade1		0.943338	0.88329	0.976355	1.0094	0.950731	1.03974	1.17397	0.887663	1.03544	1.00129
B11098_Pakistan	Clade1		1.11217	0.886698	1.077	0.955306	0.897926	1.06506	1.19527	0.94034	1.02764	0.948042
B11099_Pakistan	Clade1		1.02392	0.923738	1.06338	0.98462	0.947347	1.00418	1.08075	0.962524	1.01622	0.974894
B11220_Type_Strain_Japan	Clade2		0.969755	0.988356	1.0145	0.993494	0.987171	1.05651	1.17764	0.899144	1.09979	1.00243
B11221_South_Africa	Clade3		1.02638	0.905108	0.959191	0.97141	0.982528	1.04274	1.0983	0.866283	1.03127	1.02287
B11222_South_Africa	Clade3		1.01213	0.890181	1.04365	0.977102	0.94147	1.07422	1.08139	0.877953	1.01017	1.04533
B11223_South_Africa	Clade3		0.967114	0.943922	1.04935	1.02295	1.0357	1.05355	1.0641	0.910559	1.02512	1.0223
B11224_South_Africa	Clade3		0.950565	0.969169	1.03799	0.978194	1.02004	1.03858	1.09456	0.930736	1.06226	0.985329
B11225_South_Africa	Clade3		0.966424	0.964604	1.02612	1.07054	1.00503	1.05761	1.05728	0.865111	1.04229	1.0389
B11226_South_Africa	Clade3		1.00115	0.940389	1.09861	1.08039	0.966144	1.01724	1.12095	0.948364	1.01792	1.03441
B11227_South_Africa	Clade3		2.1696	0.851553	1.03083	0.985959	0.935425	1.09622	1.10467	0.890764	1.01858	1.02144
B11228_South_Africa	Clade3		1.09453	0.916746	1.03587	1.09837	1.01096	1.09757	1.10817	0.892414	1.01075	0.966806
B11229_South_Africa	Clade3		1.95304	0.823132	1.02258	0.980602	0.990814	1.12363	1.11554	0.865654	1.0119	1.01162
B11230_South_Africa	Clade3		1.04955	0.910394	1.08501	1.0977	0.903866	1.03194	1.09658	0.902797	0.993805	1.0757
B11244_Brazil	Clade4		0.98705	0.889325	1.07637	1.04147	0.986804	1.04233	1.12057	0.896716	1.03302	1.03069
B11245_Brazil	Clade4		1.06444	0.970701	1.05315	1.15211	0.972158	1.1034	1.09598	0.901788	1.03422	1.03486
B11246_Brazil	Clade4		1.06186	0.892968	1.0893	1.02498	1.06807	1.08219	1.11164	0.918926	1.04271	1.06836
B11247_Brazil	Clade4		1.02559	0.93195	1.02624	1.01326	1.00317	1.05301	1.08273	0.904688	1.07056	1.02193
