# Supplementary material for: Genomic insights into multidrug-resistance, mating and virulence in Candida auris and related emerging species
Source: Nat Commun. 2018 Dec 17;9:5346. doi: 10.1038/s41467-018-07779-6 (PMC6297351; doi:10.1038/s41467-018-07779-6)
Supplement: Supplementary file 8 — Supplementary Data 6 [file 41467_2018_7779_MOESM8_ESM.xlsx]

## Sheet: Data6. DEGs B8441
Supplementary data 6. Genes differentially expressed (Fold change [FC] >2; False discovery rate [FDR] < 0.05) during drug treatment with amphotericin B or voriconazole in C. auris B8441
			AMB 2hr		AMB 4hr		VCZ 2hr		VCZ 4hr
Gene ID	Gene	Condition	FC	FDR	FC	FDR	FC	FDR	FC	FDR	Name	Protein family domians	KEGG Enzymes	Gene Ontologies	KEGG Pathway	# Transmemb. domains	C. albicans homolog
induced
B9J08_004014	SIT1	Amb	2.89254	0.00319742	-0.551348	1	0.201408	0.872799	-0.744149	0.955418	hypothetical protein	PF08297.6|U3_snoRNA_assoc[U3 snoRNA associated]	.	.	.	.	.	.
B9J08_001542	ERG24	Amb	1.2358	0.696025	4.09769	0.00148843	1.83892	0.560416	3.14185	0.148119	hypothetical protein	PF07690.11|MFS_1[Major Facilitator Superfamily]	.	GO:0055085;GO:0016021	.	TMH:12	C2_08050C_A	SIT1
B9J08_003026	RBT5	Amb	1.07962	0.790746	1.9229	0.0159549	0.422215	1	1.93013	0.360971	hypothetical protein	PF01222.12|ERG4_ERG24[Ergosterol biosynthesis ERG4/ERG24 family];PF06966.7|DUF1295[Protein of unknown function (DUF1295)]	EC:1.3.1.70[Delta(14)-sterol reductase.]	EC:1.3.1.70;GO:0005783;GO:0016021;GO:0006696;GO:0050613;GO:0055114	.	TMH:8	C2_09400C_A	ERG24
B9J08_005545	CTA7	Amb	1.03387	0.537473	3.89868	2.52222e-05	1.73694	0.7173	2.24421	0.185474	hypothetical protein	PF05730.6|CFEM[CFEM domain]	.	GO:0006879;GO:0020037;GO:0030445;GO:0044011;GO:0005576;GO:0043709;GO:0020028;GO:0005886	.	.	C4_00130W_A	RBT5
B9J08_002217	PGA7	Amb	0.934183	0.862101	2.20981	0.00148843	1.74167	0.598073	1.45537	0.387399	hypothetical protein	PF04082.13|Fungal_trans[Fungal specific transcription factor domain];PF00172.13|Zn_clus[Fungal Zn(2)-Cys(6) binuclear cluster domain]	.	GO:0006357;GO:0003677;GO:0000981;GO:0005634;GO:0008270;GO:0016021;GO:0006351	.	.	C5_02700W_A	CTA7
B9J08_004469	AYR2	Amb	0.790971	0.509555	2.94142	0.000403874	0.402307	0.75302	2.2271	0.0511656	hypothetical protein	PF05730.6|CFEM[CFEM domain]	.	GO:0016020;GO:0020037;GO:0009986;GO:0044011;GO:0033212;GO:0009405	.	TMH:1	C4_00120W_A	PGA7
B9J08_002830	FRE9	Amb	0.78557	0.791111	1.96332	0.00129282	0.497604	0.860858	1.42664	0.266551	hypothetical protein	PF08659.5|KR[KR domain];PF13561.1|adh_short_C2[Enoyl-(Acyl carrier protein) reductase];PF00106.20|adh_short[short chain dehydrogenase]	.	GO:0016616;GO:0055114	.	.	C6_03270C_A	AYR2
B9J08_000168	SIT1	Amb	0.70082	0.857676	2.49982	0.00128381	0.920451	0.849211	1.5555	0.689026	hypothetical protein	PF08022.7|FAD_binding_8[FAD-binding domain];PF08030.7|NAD_binding_6[Ferric reductase NAD binding domain];PF01794.14|Ferric_reduct[Ferric reductase like transmembrane component]	.	GO:0016021;GO:0055114;GO:0016491	.	TMH:7	C2_05070W_A	FRE9
B9J08_002110	SIT1	Amb	0.629921	0.734642	1.99469	0.0215497	1.0577	0.812809	0.894767	0.910303	hypothetical protein	.	.	GO:0055085;GO:0016021;GO:0015891	.	TMH:13	C2_08050C_A	SIT1
B9J08_004475	ARG3	Amb	0.615053	0.854314	2.7314	0.0230841	2.84365	0.0688588	1.26692	0.817907	hypothetical protein	PF07690.11|MFS_1[Major Facilitator Superfamily]	.	GO:0055085;GO:0016021;GO:0033214;GO:0005737	.	TMH:12	C2_08050C_A	SIT1
B9J08_004798	.	Amb	0.593473	0.997602	2.65695	0.040376	0.632798	1	2.04433	0.598405	ornithine carbamoyltransferase	TIGR00658[orni_carb_tr: ornithine carbamoyltransferase];PF00185.19|OTCace[Aspartate/ornithine carbamoyltransferase, Asp/Orn binding domain];PF02729.16|OTCace_N[Aspartate/ornithine carbamoyltransferase, carbamoyl-P binding domain]	EC:2.1.3.3[Ornithine carbamoyltransferase.]	EC:2.1.3.3;GO:0016597;GO:0042450;GO:0005829;GO:0004585;GO:0005739	.	.	C6_03230W_A	ARG3
B9J08_003644	.	Amb	0.548738	0.679649	4.19861	0.00504622	-0.0191705	0.75302	3.7722	0.185474	hypothetical protein	.	.	.	.	.	.	.
B9J08_001070	.	Amb	0.468902	0.704042	1.58945	0.0324724	0.867785	0.846694	0.816848	0.908768	hypothetical protein	PF07690.11|MFS_1[Major Facilitator Superfamily]	.	GO:0055085;GO:0016021	.	TMH:10	CR_06790C_A	.
B9J08_001750	.	Amb	0.450372	0.857676	1.93564	0.0400589	0.594825	0.691843	1.96536	0.191983	hypothetical protein	.	.	.	.	.	.	.
B9J08_003179	FAS2	Amb	0.429364	0.453197	1.79652	0.0242479	0.520128	0.665174	1.58195	0.3384	hypothetical protein	.	.	GO:0003677;GO:0006950	.	.	C2_05860C_A	.
B9J08_002420	.	Amb	0.392736	0.970084	2.40367	0.00743058	0.835104	0.91314	1.42691	0.634971	fatty acid synthase subunit alpha	PF00109.21|ketoacyl-synt[Beta-ketoacyl synthase, N-terminal domain];PF01648.15|ACPS[4'-phosphopantetheinyl transferase superfamily];PF13561.1|adh_short_C2[Enoyl-(Acyl carrier protein) reductase];PF00106.20|adh_short[short chain dehydrogenase];PF02801.17|Ketoacyl-synt_C[Beta-ketoacyl synthase, C-terminal domain]	EC:2.3.1.86[Fatty-acyl-CoA synthase.]	GO:0000287;GO:0055114;GO:0004316;EC:1.1.1.100;EC:2.7.8.7;GO:0004315;EC:2.3.1.41;GO:0004321;GO:0006633;EC:2.3.1.86;GO:0008897	.	.	C3_04830C_A	FAS2
B9J08_003110	MET15	Amb	0.392547	0.633018	1.71044	0.0242479	1.12195	0.323634	-0.0923742	1	hypothetical protein	.	.	.	.	TMH:1	.	.
B9J08_003514	.	Amb	0.347541	1	2.10074	0.00434199	0.439591	1	2.31777	0.217113	protein MET17	PF00155.16|Aminotran_1_2[Aminotransferase class I and II];PF01041.12|DegT_DnrJ_EryC1[DegT/DnrJ/EryC1/StrS aminotransferase family];PF00266.14|Aminotran_5[Aminotransferase class-V];PF01053.15|Cys_Met_Meta_PP[Cys/Met metabolism PLP-dependent enzyme];PF02347.11|GDC-P[Glycine cleavage system P-protein]	.	GO:0003961;GO:0004124;GO:0071266;GO:0005737;GO:0030446;EC:2.5.1.49;EC:2.5.1.47;GO:0019344;GO:0030170	.	.	C4_00200C_A	MET15
B9J08_003601	OPT1	Amb	0.329769	0.78845	3.13104	0.040376	-1.34193	0.75302	2.34419	0.574586	hypothetical protein	.	.	.	.	.	.	.
B9J08_004066	GCN20	Amb	0.282365	1	1.93189	0.00721453	1.67376	0.75302	0.783166	0.889832	OPT family small oligopeptide transporter	PF03169.10|OPT[OPT oligopeptide transporter protein];TIGR00727[ISP4_OPT: small oligopeptide transporter, OPT family]	.	GO:0005427;GO:0031520;GO:0005887;GO:0034775;GO:0005789	.	TMH:14	CR_02020C_A	OPT1
B9J08_004446	ARG1	Amb	0.240448	0.897212	3.72869	0.0175999	3.52578	0.155996	1.85216	0.744449	hypothetical protein	PF00005.22|ABC_tran[ABC transporter];PF13304.1|AAA_21[AAA domain];PF12848.2|ABC_tran_2[ABC transporter]	.	.	.	.	C1_00480C_A	GCN20
B9J08_000686	SIT1	Amb	-0.0152024	0.943284	1.92222	0.00743058	0.276813	1	1.32195	0.744449	argininosuccinate synthase	PF00764.14|Arginosuc_synth[Arginosuccinate synthase];PF06508.8|QueC[Queuosine biosynthesis protein QueC];TIGR00032[argG: argininosuccinate synthase];PF00733.16|Asn_synthase[Asparagine synthase]	EC:6.3.4.5[Argininosuccinate synthase.]	GO:0005524;EC:6.3.4.5;GO:0004055;GO:0005829;GO:0006526	ko00330[Arginine and proline metabolism]	.	CR_00620C_A	ARG1
B9J08_001487	FAS1	Amb	-0.0211004	0.91627	2.40024	0.00600638	2.4448	0.190222	0.428979	1	hypothetical protein	PF07690.11|MFS_1[Major Facilitator Superfamily]	.	GO:0055085;GO:0016021	.	TMH:12	C2_08050C_A	SIT1
B9J08_001296	CSA1	Amb	-0.0581555	0.922297	2.07029	0.0300686	0.760568	0.944774	1.175	0.822428	fatty acid synthase subunit beta	PF13452.1|MaoC_dehydrat_N[N-terminal half of MaoC dehydratase];PF00698.16|Acyl_transf_1[Acyl transferase domain];PF01575.14|MaoC_dehydratas[MaoC like domain];PF08354.5|DUF1729[Domain of unknown function (DUF1729)]	EC:2.3.1.86[Fatty-acyl-CoA synthase.]	EC:1.3.1.9;GO:0005835;GO:0004318;GO:0006633;GO:0055114	.	.	C5_00190C_A	FAS1
B9J08_001951	SEC26	Amb	-0.460355	0.731173	3.06002	0.0230841	2.91311	0.271538	-0.224571	0.985543	hypothetical protein	PF05730.6|CFEM[CFEM domain]	.	GO:0006879;GO:0030446;GO:0009986;GO:0044011;GO:0046658;GO:0005933	.	.	C7_00090C_A	CSA1
B9J08_005544	.	Both	8.26824	2.73247e-08	7.49181	0.0110577	3.63803	0.00893687	.	.	coatomer subunit beta	PF01602.15|Adaptin_N[Adaptin N terminal region]	.	GO:0006886;GO:0030126;GO:0005829;GO:0005198;GO:0005886;GO:0016192;GO:0000139	.	.	CR_04380C_A	SEC26
B9J08_001520	.	Both	5.10479	1.95908e-06	3.39183	0.681123	5.12283	2.53514e-05	2.3776	0.994035	hypothetical protein	.	.	.	.	.	.	.
B9J08_000675	PCK1	Both	3.19536	4.50554e-05	4.04275	0.00336559	5.28751	3.16725e-11	0.840573	1	hypothetical protein	PF07691.7|PA14[PA14 domain]	.	.	.	.	.	.
B9J08_002669	.	Both	2.77956	0.00319742	2.42127	0.570358	3.4753	0.00323299	2.47785	0.896718	phosphoenolpyruvate carboxykinase [ATP]	TIGR00224[pckA: phosphoenolpyruvate carboxykinase (ATP)];PF01293.15|PEPCK_ATP[Phosphoenolpyruvate carboxykinase]	EC:4.1.1.49[Phosphoenolpyruvate carboxykinase (ATP).]	GO:0016310;GO:0005524;GO:0006094;GO:0016301;GO:0005829;EC:4.1.1.49;GO:0004612	ko00020[Citrate cycle (TCA cycle)];ko00620[Pyruvate metabolism];ko00710[Carbon fixation in photosynthetic organisms]	.	CR_00200W_A	PCK1
B9J08_002244	AIF1	Both	2.44165	0.00319742	2.54675	0.352469	3.07307	0.00413079	0.458567	1	hypothetical protein	.	.	.	.	.	.	.
B9J08_002499	.	Both	2.3049	0.00013756	3.1539	0.0206463	3.86055	1.92179e-05	2.06716	0.817907	hypothetical protein	PF00070.22|Pyr_redox[Pyridine nucleotide-disulphide oxidoreductase];PF13434.1|K_oxygenase[L-lysine 6-monooxygenase (NADPH-requiring)];PF07992.9|Pyr_redox_2[Pyridine nucleotide-disulphide oxidoreductase]	.	GO:0055114;GO:0016491	.	TMH:1	C4_03350C_A	AIF1
B9J08_002119	.	Both	2.25686	0.0183695	3.13135	0.015068	2.1099	0.0258033	2.37646	0.593999	hypothetical protein	.	.	.	.	.	.	.
B9J08_000169	NGT1	Both	2.05705	0.0233052	1.64502	0.272465	2.09834	0.0165854	2.23548	0.337632	hypothetical protein	PF02195.13|ParBc[ParB-like nuclease domain]	EC:1.8.98.2[Sulfiredoxin.]	GO:0005634;GO:0005524;GO:0055114;GO:0032542;EC:1.8.98.2;GO:0005829;GO:0034599;GO:0098869;GO:0034613	.	.	C2_05060C_A	.
B9J08_002864	HGT7	Both	1.79645	0.0891129	4.28757	9.73151e-05	1.88823	0.0181854	3.63265	0.190126	hypothetical protein	PF05978.11|UNC-93[Ion channel regulatory protein UNC-93]	.	GO:0015572;GO:0015764;GO:0016021;GO:0005886;GO:0005737	.	TMH:12	C3_00650W_A	NGT1
B9J08_002480	ARO10	Both	1.73833	0.0268929	1.50239	1	2.83962	0.00712416	1.32617	1	hypothetical protein	PF07690.11|MFS_1[Major Facilitator Superfamily];PF00083.19|Sugar_tr[Sugar (and other) transporter]	.	GO:0055085;GO:0016021;GO:0022857	.	TMH:12	C2_01000W_A	HGT7
B9J08_004930	FTH1	Both	1.70829	0.0302267	2.30252	0.769572	2.11449	0.0230928	0.59353	1	hypothetical protein	PF02776.13|TPP_enzyme_N[Thiamine pyrophosphate enzyme, N-terminal TPP binding domain];PF02775.16|TPP_enzyme_C[Thiamine pyrophosphate enzyme, C-terminal TPP binding domain];PF00205.17|TPP_enzyme_M[Thiamine pyrophosphate enzyme, central domain]	EC:4.1.1.-[Carboxy-lyases.]	GO:0050177;GO:0000287;GO:0000950;GO:0006569;GO:0000951;EC:4.1.1.43;GO:0006552;GO:0000949;GO:0030976;GO:0006559	.	.	CR_06860C_A	ARO10
B9J08_000170	FRP1	Both	1.69877	0.0183695	2.58911	0.0188623	1.82703	0.00859936	2.04816	0.555075	hypothetical protein	PF03239.9|FTR1[Iron permease FTR1 family]	.	GO:0033573;GO:0000329;GO:0006897;GO:0005381	.	TMH:6	C1_09400C_A	FTH1
B9J08_004468	OPT1	Both	1.30458	0.160381	3.34229	0.00148843	2.00453	0.0112273	1.7326	0.866768	hypothetical protein	PF08030.7|NAD_binding_6[Ferric reductase NAD binding domain];PF08022.7|FAD_binding_8[FAD-binding domain];PF01794.14|Ferric_reduct[Ferric reductase like transmembrane component]	.	GO:0016021;GO:0055114;GO:0016491	.	TMH:5	C4_00110C_A	FRP1
B9J08_001998	.	Both	0.604086	0.917113	5.48331	6.63602e-13	0.981698	0.870315	4.65149	6.39519e-08	OPT family small oligopeptide transporter	PF03169.10|OPT[OPT oligopeptide transporter protein];TIGR00727[ISP4_OPT: small oligopeptide transporter, OPT family]	.	GO:0055085;GO:0016021	.	TMH:14	CR_02020C_A	OPT1
B9J08_005542	.	Vcz	.	.	.	.	6.35414	0.00631918	.	.	DNA-binding protein%2C 42 kDa	PF00557.19|Peptidase_M24[Metallopeptidase family M24]	.	GO:0003677;GO:0005634;GO:0016787;GO:0005829	.	.	C7_02100W_A	.
B9J08_004296	PTR22	Vcz	2.31814	0.0742032	3.49456	0.191199	3.26728	0.000783832	2.73783	0.955418	hypothetical protein	.	.	.	.	TMH:1	.	.
B9J08_004188	.	Vcz	1.64696	0.406411	2.18176	0.389204	2.40736	0.00413079	1.37953	0.998874	hypothetical protein	PF00854.16|PTR2[POT family]	.	GO:0042937;GO:0042939;GO:0031520;GO:0000324;GO:0035442;GO:0016021;GO:0032153;GO:0071916	.	TMH:11	C3_03800W_A	PTR22
B9J08_004033	SOU2	Vcz	1.59285	0.314121	2.05789	0.199077	2.75123	0.0258033	1.5005	0.817907	hypothetical protein	.	.	.	.	.	.	.
B9J08_003268	.	Vcz	1.1748	0.0951035	2.15065	0.554771	2.05527	0.00631918	1.24296	1	hypothetical protein	PF08659.5|KR[KR domain];PF13561.1|adh_short_C2[Enoyl-(Acyl carrier protein) reductase];PF00106.20|adh_short[short chain dehydrogenase]	.	GO:0055114;GO:0016491	.	.	C4_06380W_A	SOU2
B9J08_004890	.	Vcz	0.927954	0.500991	2.55378	0.0729295	1.84345	0.0108122	1.92105	0.854059	hypothetical protein	PF01425.16|Amidase[Amidase]	EC:3.5.1.4[Amidase.]	GO:0005829;GO:0016884	ko00643[Styrene degradation];ko00380[Tryptophan metabolism];ko00360[Phenylalanine metabolism];ko00627[Aminobenzoate degradation];ko00460[Cyanoamino acid metabolism]	.	C6_02660C_A	.
B9J08_002790	.	Vcz	-0.203965	0.744819	1.75905	0.987389	2.81488	0.0140767	-0.593671	0.910303	hypothetical protein	.	.	GO:0046872;GO:0003676	.	.	.	.
Repressed
B9J08_000290	GIN4	Amb	-0.789502	0.539437	-1.97176	0.0380477	-1.38335	0.445073	-1.06799	0.892	hypothetical protein	PF00069.20|Pkinase[Protein kinase domain];PF07714.12|Pkinase_Tyr[Protein tyrosine kinase]	.	GO:0005524;GO:0044257;GO:0005935;GO:0046777;GO:0004672;GO:0005940;GO:0000086;GO:0051726	.	.	C1_11400C_A	GIN4
B9J08_000340	SWE1	Amb	-0.459125	0.539437	-1.87966	0.00743058	-1.1396	0.40242	-0.957339	0.808526	hypothetical protein	PF00069.20|Pkinase[Protein kinase domain];PF07714.12|Pkinase_Tyr[Protein tyrosine kinase]	EC:2.7.11.1[Non-specific serine/threonine protein kinase.]	GO:0036289;GO:0038083;GO:0010697;GO:0005524;GO:0000320;GO:0072453;GO:0045835;GO:0004713;EC:2.7.12.1;GO:0005634;GO:0004712;GO:0044878;GO:0044732;GO:1902402;GO:0005935;GO:0004674;EC:2.7.11;GO:0071341;EC:2.7.10;GO:0000086;GO:0044387;GO:0000079	ko04113[Meiosis - yeast]	.	C1_10010C_A	SWE1
B9J08_001096	.	Amb	-0.909785	0.47816	-2.6436	9.73151e-05	-1.29257	0.155996	-1.4622	0.528738	hypothetical protein	.	.	GO:0006355;GO:0043565;GO:0008270;GO:0003700	.	.	C5_02780W_A	.
B9J08_001130	PDS5	Amb	-0.466446	0.509555	-2.11016	0.00148843	-1.73978	0.094598	-1.44193	0.660295	hypothetical protein	.	.	GO:0007129;GO:0071168;GO:0051455;GO:0007076;GO:0006302;GO:2000817;GO:0000794;GO:0005829;GO:0007064	.	.	C2_07660W_A	PDS5
B9J08_001366	.	Amb	-0.674929	0.537473	-2.74058	0.000660587	-2.40739	0.205842	-0.650835	0.970292	hypothetical protein	PF13928.1|Flocculin_t3[Flocculin type 3 repeat]	.	.	.	.	.	.
B9J08_001426	.	Amb	-0.513559	0.783359	-2.07536	0.0227799	-0.690187	0.851498	-0.820618	0.955418	hypothetical protein	.	.	.	.	.	.	.
B9J08_001644	RFA1	Amb	0.0610765	0.78845	-2.1245	0.00151861	-1.3074	0.312853	-1.0108	0.891217	hypothetical protein	PF04057.7|Rep-A_N[Replication factor-A protein 1, N-terminal domain];PF08646.5|Rep_fac-A_C[Replication factor-A C terminal domain];PF01336.20|tRNA_anti-codon[OB-fold nucleic acid binding domain]	.	GO:0000781;GO:0016567;GO:0006268;GO:0003690;GO:0006289;GO:0003697;GO:0007131;GO:0005829;GO:0007004;GO:0043565;GO:0006265;GO:0045184;GO:0000722;GO:0000794;GO:0030491;GO:0000724;GO:0005662	ko03430[Mismatch repair];ko03440[Homologous recombination];ko03420[Nucleotide excision repair]	.	C2_00380C_A	RFA1
B9J08_001667	DPB2	Amb	-0.525278	0.60363	-2.28834	0.01641	-1.88013	0.0914909	-1.06515	0.896718	hypothetical protein	PF04042.11|DNA_pol_E_B[DNA polymerase alpha/epsilon subunit B]	EC:2.7.7.7[DNA-directed DNA polymerase.]	GO:0008622;GO:0003690;GO:0000790;GO:0003887;GO:0042276;GO:0045005;GO:0005829;GO:1902975;EC:2.7.7.7	ko03030[DNA replication];ko03410[Base excision repair];ko00240[Pyrimidine metabolism];ko03420[Nucleotide excision repair]	.	CR_09900C_A	DPB2
B9J08_002030	MSH6	Amb	-0.325041	0.675439	-1.97584	0.0030173	-1.63489	0.218405	-0.940259	0.887015	hypothetical protein	PF05188.12|MutS_II[MutS domain II];PF05192.13|MutS_III[MutS domain III];PF00488.16|MutS_V[MutS domain V];PF01624.15|MutS_I[MutS domain I];PF05190.13|MutS_IV[MutS family domain IV]	.	GO:0005524;EC:3.6.1.3;GO:0032137;GO:0000710;GO:0005829;GO:0032138;GO:0036297;GO:0043570;GO:0032301;GO:0000400;GO:0016887	ko05200[Pathways in cancer];ko05210[Colorectal cancer]	.	C1_13170C_A	MSH6
B9J08_002051	EXO1	Amb	-0.417733	0.591029	-2.16345	0.00336559	-0.631402	0.729636	-0.718785	0.931361	hypothetical protein	PF00867.13|XPG_I[XPG I-region];PF00752.12|XPG_N[XPG N-terminal domain]	EC:3.1.-.-[Acting on ester bonds.]	GO:0003677;GO:0006281;GO:0090305;GO:0035312	.	.	C5_00630C_A	EXO1
B9J08_002600	PMM1	Amb	-1.1352	0.321462	-1.83524	0.0102402	-1.53753	0.13304	-1.59609	0.528738	phosphomannomutase	PF03332.8|PMM[Eukaryotic phosphomannomutase];PF08282.7|Hydrolase_3[haloacid dehalogenase-like hydrolase]	EC:5.4.2.8[Phosphomannomutase.]	GO:0045047;EC:5.4.2.8;GO:0004615;GO:0005829;GO:0009298	ko00520[Amino sugar and nucleotide sugar metabolism]	.	C1_02480W_A	PMM1
B9J08_002743	DAM1	Amb	-1.33979	0.675439	-1.91146	0.040376	-0.850504	0.773625	-1.51325	0.50214	hypothetical protein	PF08653.5|DASH_Dam1[DASH complex subunit Dam1]	.	GO:0072686;GO:0042729;GO:0008608	.	.	C1_09730W_A	DAM1
B9J08_002929	YBL053	Amb	-0.293128	0.579083	-1.84234	0.0109663	-1.48695	0.60654	-0.945228	0.896718	hypothetical protein	PF04821.9|TIMELESS[Timeless protein]	.	GO:0003677;GO:0006281;GO:0044732;GO:0048478;GO:0000790;GO:0033314;GO:0045950;GO:0031298;GO:0005829;GO:0043111;GO:0031297;GO:0043570;GO:0007064;GO:0007534	.	.	C5_01460W_A	YBL053
B9J08_003057	IRR1	Amb	-0.967439	0.380004	-2.21894	0.00148843	-1.08229	0.295541	-1.37495	0.51493	hypothetical protein	PF08514.6|STAG[STAG domain]	.	GO:0031934;GO:0031505;GO:0006473;GO:1990707;GO:0034990;GO:0005829;GO:0003682;GO:0007064;GO:0031618;GO:0009847;GO:0000755	ko04113[Meiosis - yeast];ko04111[Cell cycle - yeast]	.	C1_14230C_A	IRR1
B9J08_003116	.	Amb	0.379548	0.923208	-3.08822	0.0159549	-1.0945	0.75302	-1.10087	0.908768	hypothetical protein	PF13659.1|Methyltransf_26[Methyltransferase domain];PF05185.11|PRMT5[PRMT5 arginine-N-methyltransferase]	EC:2.1.1.125[Histone-arginine N-methyltransferase.]	GO:0016571;GO:0000902;GO:0044257;GO:0042054;GO:0032174;GO:0035241;GO:0000086;GO:0045840;GO:0035243;GO:0019918	ko04111[Cell cycle - yeast]	.	.	.
B9J08_003286	.	Amb	-1.0256	0.499117	-1.74607	0.0102402	-1.85693	0.36145	-0.431076	0.908768	hypothetical protein	.	.	.	.	.	.	.
B9J08_003782	.	Amb	-0.353419	0.738149	-1.89784	0.0242479	-0.791554	0.900565	-1.09029	0.866768	hypothetical protein	.	.	GO:0005815	.	.	C4_07080C_A	.
B9J08_003942	FEN1	Amb	-0.849634	0.436637	-1.6689	0.0325185	-0.915505	0.569211	-1.41833	0.451433	hypothetical protein	PF01151.13|ELO[GNS1/SUR4 family]	EC:2.3.1.-[Transferring groups other than amino-acyl groups.]	GO:0016021;GO:0006633;GO:0016740	.	TMH:7	C1_12790C_A	FEN1
B9J08_004109	RBR3	Amb	-2.4152	0.251797	-3.09004	0.0110577	-3.43019	0.15681	-2.58899	0.0781831	hypothetical protein	PF11765.3|Hyphal_reg_CWP[Hyphally regulated cell wall protein N-terminal]	.	.	.	.	C7_03290C_A	RBR3
B9J08_004382	ECM331	Amb	-0.829031	0.47816	-2.41154	0.010761	-2.22457	0.0615571	-1.04736	0.908768	hypothetical protein	.	.	GO:0031224;GO:0009277;GO:0009986;GO:0005829;GO:0035556;GO:0005886	.	.	C5_02460C_A	ECM331
B9J08_004628	.	Amb	-0.471753	0.891108	-4.5596	0.000255458	-2.71957	0.0778027	-1.46268	0.813066	hypothetical protein	.	.	.	.	.	.	.
B9J08_004757	.	Amb	-0.848671	0.533158	-1.73681	0.0349102	-0.528559	0.717108	-1.21217	0.593999	hypothetical protein	PF12799.2|LRR_4[Leucine Rich repeats (2 copies)];PF13855.1|LRR_8[Leucine rich repeat]	.	GO:0010458;GO:0005816;GO:0005200;GO:0000073;GO:0051293;GO:0045132	.	.	C3_07110W_A	.
B9J08_004853	SMC1	Amb	-0.334858	0.821863	-1.8175	0.0200438	-1.43092	0.472738	-0.970853	0.902426	hypothetical protein	PF02463.14|SMC_N[RecF/RecN/SMC N terminal domain];PF13555.1|AAA_29[P-loop containing region of AAA domain];PF06470.8|SMC_hinge[SMC proteins Flexible Hinge Domain]	.	GO:0006302;GO:0005524;GO:0034990;GO:0042802;GO:0003682;GO:0046982;GO:0003680;GO:0000217;GO:0007064	ko04113[Meiosis - yeast];ko04111[Cell cycle - yeast];ko04114[Oocyte meiosis]	.	CR_03680C_A	SMC1
B9J08_004892	HYR3	Amb	-0.25189	0.885485	-2.53584	0.040376	-0.979438	0.841543	-1.51203	0.828105	hypothetical protein	PF11765.3|Hyphal_reg_CWP[Hyphally regulated cell wall protein N-terminal]	.	.	.	.	C5_00730W_A	HYR3
B9J08_004970	KIP3	Amb	-1.58758	0.314121	-2.21614	0.00148843	-1.05342	0.403251	-1.66909	0.288351	hypothetical protein	PF00225.18|Kinesin[Kinesin motor domain]	.	GO:0000132;GO:0005524;GO:0005881;GO:0030473;EC:3.6.4.4;GO:0070463;GO:0005880;GO:0070462;GO:0032888;GO:0031115;GO:0008574;GO:0030472;GO:0008152;GO:0051228;GO:0008017;GO:0090307	.	.	C3_05720C_A	KIP3
B9J08_005053	SMC3	Amb	-0.522573	0.581325	-1.53085	0.0405208	-1.13207	0.43502	-1.02621	0.801724	hypothetical protein	PF02463.14|SMC_N[RecF/RecN/SMC N terminal domain];PF13476.1|AAA_23[AAA domain];PF13304.1|AAA_21[AAA domain];PF06470.8|SMC_hinge[SMC proteins Flexible Hinge Domain]	.	GO:1990414;GO:0030437;GO:0005524;GO:0042802;GO:0051177;GO:0007130;GO:0034990;GO:0007131;GO:0003682;GO:0007064	ko04113[Meiosis - yeast];ko04111[Cell cycle - yeast];ko04114[Oocyte meiosis]	.	C3_02700W_A	SMC3
B9J08_005241	POL30	Amb	-1.17779	0.312102	-1.96757	0.0175999	-1.25807	0.198507	-1.18101	0.828105	proliferating cell nuclear antigen (pcna)	PF04139.8|Rad9[Rad9];PF02747.10|PCNA_C[Proliferating cell nuclear antigen, C-terminal domain];TIGR00590[pcna: proliferating cell nuclear antigen (pcna)];PF00705.13|PCNA_N[Proliferating cell nuclear antigen, N-terminal domain]	.	GO:0003677;GO:0000781;GO:0006275;GO:1903022;GO:0006289;GO:0030337;GO:0000710;GO:0035753;GO:0006272;GO:0005634;GO:0030466;GO:0043626;GO:0042802;GO:0006348;GO:0070987;GO:0006273;GO:1902394;GO:0034087;GO:0005657	ko03410[Base excision repair];ko03430[Mismatch repair];ko03420[Nucleotide excision repair];ko04110[Cell cycle]	.	C4_01770W_A	POL30
B9J08_005255	TOS4	Amb	-1.32562	0.499117	-2.06604	0.00540452	-1.20983	0.75302	-1.66762	0.331576	hypothetical protein	.	.	GO:0005634	.	.	C1_11350C_A	TOS4
B9J08_005515	POL1	Amb	-0.514153	0.586771	-2.31353	0.00425068	-2.34182	0.060552	-0.98827	0.910303	hypothetical protein	PF08996.5|zf-DNA_Pol[DNA Polymerase alpha zinc finger];PF00136.16|DNA_pol_B[DNA polymerase family B];PF12254.3|DNA_pol_alpha_N[DNA polymerase alpha subunit p180 N terminal];PF03104.14|DNA_pol_B_exo1[DNA polymerase family B, exonuclease domain]	EC:2.7.7.7[DNA-directed DNA polymerase.]	GO:0003677;GO:0006270;GO:0001882;GO:0006302;GO:0006279;GO:0003887;GO:0008408;GO:0000731;GO:0000166;GO:0090305;GO:0005658;EC:2.7.7.7;GO:0006278	ko03030[DNA replication];ko00240[Pyrimidine metabolism]	.	C3_04300C_A	POL1
B9J08_000555	.	Both	-0.818391	0.448169	-2.2281	0.000660587	-1.8705	0.021331	-1.26283	0.689026	hypothetical protein	PF00412.17|LIM[LIM domain]	.	GO:0005094;GO:0043332;GO:0005934;GO:0050790;GO:0005935;GO:0005737;GO:0000131;GO:0008270;GO:0035023;GO:0030011	.	.	C6_02090C_B	.
B9J08_001458	.	Both	-1.15161	0.419676	-3.31401	0.0102402	-4.23662	0.00155695	-2.00545	0.478678	hypothetical protein	PF01391.13|Collagen[Collagen triple helix repeat (20 copies)];PF10182.4|Flo11[Flo11 domain]	.	.	.	.	.	.
B9J08_001469	GIN1	Both	-0.360012	0.62042	-2.2384	0.00148843	-2.2336	0.012892	-1.10772	0.889832	hypothetical protein	PF09444.5|MRC1[MRC1-like domain]	.	GO:0030466;GO:0000781;GO:0006281;GO:0033262;GO:0048478;GO:0006348;GO:0000076;GO:0031573;GO:0031298;GO:0043570;GO:0007064;GO:0000723	.	.	C1_11440C_A	GIN1
B9J08_002225	PRI2	Both	-0.48784	0.696773	-2.7627	2.52222e-05	-1.80775	0.0432976	-1.18595	0.808526	hypothetical protein	PF04104.9|DNA_primase_lrg[Eukaryotic and archaeal DNA primase, large subunit]	EC:2.7.7.-[Nucleotidyltransferases.]	GO:0003677;GO:0006269;GO:0003896;GO:0005635;GO:0006302;GO:0003887;GO:0046872;GO:0071897;GO:0005829;GO:0051539;GO:0005658;EC:2.7.7.7;GO:1990077	ko03030[DNA replication];ko00240[Pyrimidine metabolism]	.	C4_06490C_A	PRI2
B9J08_003571	.	Both	-1.32025	0.269851	-2.25686	0.00600638	-2.2205	0.00413079	-1.9281	0.386159	hypothetical protein	PF00026.18|Asp[Eukaryotic aspartyl protease]	.	EC:3.4.23;GO:0006508;GO:0004190	.	.	.	.
B9J08_004887	.	Both	-5.97921	0.321462	-5.39889	9.73151e-05	-5.98171	0.190097	-6.25592	0.000131055	hypothetical protein	.	.	GO:0016021	.	TMH:7	.	.
B9J08_004888	SAP8	Both	-3.25025	0.00013756	-1.79715	0.13294	-4.53943	0.00413079	-2.94715	0.0652089	hypothetical protein	PF00026.18|Asp[Eukaryotic aspartyl protease]	.	EC:3.4.23;GO:0006508;GO:0004190	.	.	C3_02510C_A	SAP8
B9J08_005205	AXL2	Both	-0.794438	0.436637	-2.00557	0.0159549	-2.51005	0.00323299	-0.93426	0.906489	hypothetical protein	PF05345.7|He_PIG[Putative Ig domain]	.	GO:0005887;GO:0005509;GO:0005940;GO:0005935;GO:0007120	.	TMH:1	C4_04170C_A	AXL2
B9J08_005574	.	Both	-0.490416	0.537473	-2.85017	3.96645e-05	-2.84511	0.000239201	-0.702387	0.981257	hypothetical protein	.	.	.	.	.	.	.
B9J08_000087	CDC46	Vcz	-0.286595	0.886687	-1.63489	0.106067	-1.92351	0.0432976	-0.988004	0.908768	hypothetical protein	PF00493.18|MCM[MCM2/3/5 family];PF07728.9|AAA_5[AAA domain (dynein-related subfamily)];PF14551.1|MCM_N[MCM N-terminal domain]	.	GO:0006343;GO:0003688;GO:0030174;GO:0000784;GO:0005524;GO:0032508;GO:0003697;GO:0031298;GO:0005656;GO:0005829;GO:0042555;GO:0003682;GO:0031939;GO:0000727;GO:0051097;GO:0006270;GO:0006348;GO:0031261;GO:0006267;GO:0051301;GO:0003678	ko04113[Meiosis - yeast];ko04111[Cell cycle - yeast];ko04110[Cell cycle]	.	C2_06250C_A	CDC46
B9J08_000685	.	Vcz	-0.82183	0.550509	-2.23124	0.358129	-2.57831	0.0193833	-1.17277	0.889832	hypothetical protein	PF14033.1|DUF4246[Protein of unknown function (DUF4246)]	.	.	.	.	C1_03720C_A	.
B9J08_001105	MCM6	Vcz	-0.305016	0.763549	-1.36859	0.118828	-2.2667	0.00445734	-0.774404	0.957324	hypothetical protein	PF01078.16|Mg_chelatase[Magnesium chelatase, subunit ChlI];PF00493.18|MCM[MCM2/3/5 family];PF14551.1|MCM_N[MCM N-terminal domain]	.	GO:0003688;GO:0005524;GO:0006268;GO:0005737;GO:0031298;GO:0009378;GO:0005656;GO:0042555;GO:0000727;GO:0006270;GO:0043142;GO:0006271;GO:0031261;GO:0006267;GO:0097373;GO:0043140	ko04113[Meiosis - yeast];ko04111[Cell cycle - yeast];ko04110[Cell cycle]	.	CR_02110W_A	MCM6
B9J08_003109	.	Vcz	-0.0937268	1	0.052137	1	-2.99291	0.00700408	0.0418761	1	hypothetical protein	.	.	.	.	.	.	.
B9J08_003467	CDC54	Vcz	-0.165195	0.674276	-1.10865	0.475243	-1.95205	0.0432976	-0.655752	0.998874	hypothetical protein	PF01078.16|Mg_chelatase[Magnesium chelatase, subunit ChlI];PF00493.18|MCM[MCM2/3/5 family];PF07728.9|AAA_5[AAA domain (dynein-related subfamily)];PF14551.1|MCM_N[MCM N-terminal domain]	.	GO:0003677;GO:0005634;GO:0005524;GO:0006270;GO:0032508;GO:0042555;GO:0051301;GO:0003678	ko04113[Meiosis - yeast];ko04111[Cell cycle - yeast];ko04110[Cell cycle]	.	C1_12550C_A	CDC54
B9J08_003891	.	Vcz	-0.0451881	0.855533	-1.74579	0.898187	-5.50195	0.0124848	-0.571283	1	hypothetical protein	.	.	GO:0006357;GO:0003677;GO:0000981;GO:0005634;GO:0008270;GO:0006351	.	.	.	.
B9J08_004547	.	Vcz	0.180556	0.865635	-0.354715	1	-3.15687	0.00323299	0.797617	0.941621	hypothetical protein	PF10355.4|Ytp1[Protein of unknown function (Ytp1)]	.	GO:0016021	.	TMH:7	C1_09000W_A	.
B9J08_005249	GIN4	Vcz	-0.540468	0.550509	-1.32154	0.266402	-1.92855	0.0432976	-0.771837	0.955418	hypothetical protein	PF00069.20|Pkinase[Protein kinase domain];PF07714.12|Pkinase_Tyr[Protein tyrosine kinase]	.	GO:0001558;GO:0035690;GO:0005524;GO:0006468;GO:0005935;GO:0004672;GO:0044182;GO:0000131;GO:0005940;GO:0000921	.	.	C1_11400C_A	GIN4
B9J08_005476	MCM2	Vcz	-0.578481	0.515877	-1.39039	0.165084	-2.47335	0.0021983	-0.582635	0.998874	hypothetical protein	PF01078.16|Mg_chelatase[Magnesium chelatase, subunit ChlI];PF00493.18|MCM[MCM2/3/5 family];PF07728.9|AAA_5[AAA domain (dynein-related subfamily)];PF12619.3|MCM2_N[Mini-chromosome maintenance protein 2];PF14551.1|MCM_N[MCM N-terminal domain]	.	GO:0003688;GO:0000784;GO:0005524;GO:1902450;GO:0032508;GO:0005737;GO:0003697;GO:0031298;GO:0003682;GO:0005656;GO:0042555;GO:0000727;GO:0006270;GO:0000790;GO:0006271;GO:0031261;GO:0006267;GO:0003678	ko04113[Meiosis - yeast];ko04111[Cell cycle - yeast];ko04110[Cell cycle]	.	CR_03830C_A	MCM2

## Sheet: Data6. DEGS B11210
Supplementary data 6. Genes differentially expressed (Fold change [FC] >4; False discovery rate [FDR] < 0.001) during drug treatment with amphotericin B or voriconazole in C. auris B11210
			AMB 2hr		AMB 4hr		VCZ 2hr		VCZ 4hr
Gene ID	Gene	Condition	FC	FDR	FC	FDR	FC	FDR	FC	FDR	Name	Protein family domians	KEGG Enzymes	Gene Ontologies	KEGG Pathway	# Transmemb. domains	C. albicans homolog
Induced
B9J08_000254	RPS17B	Amb	3.3902	0.000175164	0.575425	1	2.51963	0.00416391	0.178024	1	40S ribosomal protein S17-B	PF00833.13|Ribosomal_S17e[Ribosomal S17]	.	GO:0005840;GO:0006412;GO:0003735	.	.	C1_10870W_A	RPS17B
B9J08_001128	.	Amb	2.85939	0.000175164	0.45321	1	2.49026	0.00205466	0.54944	1	hypothetical protein	PF00673.16|Ribosomal_L5_C[ribosomal L5P family C-terminus]	.	GO:0005762;GO:0003735	.	.	C2_07680W_A	.
B9J08_003107	RPS10	Amb	3.43404	0.000181263	0.413837	1	2.97154	0.00169998	0.263731	1	40S ribosomal protein S10-A	PF03501.10|S10_plectin[Plectin/S10 domain]	.	GO:0030446;GO:0009986;GO:0006412;GO:0003735;GO:0022627	.	.	C2_08040C_A	RPS10
B9J08_002484	ERF1	Amb	3.18239	0.000184595	0.541881	1	2.93693	0.00116373	0.327011	1	eukaryotic peptide chain release factor subunit 1	PF03464.10|eRF1_2[eRF1 domain 2];PF03463.10|eRF1_1[eRF1 domain 1];PF03465.10|eRF1_3[eRF1 domain 3];TIGR03676[aRF1/eRF1: peptide chain release factor 1, archaeal and eukaryotic forms]	.	GO:0005634;GO:0018444;GO:0005829;GO:0016149;GO:0002184	.	.	C2_05100C_A	ERF1
B9J08_000320	SER33	Amb	2.5562	0.000184595	-0.176873	1	2.00929	0.00294304	-0.64612	1	D-3-phosphoglycerate dehydrogenase 1	PF00389.25|2-Hacid_dh[D-isomer specific 2-hydroxyacid dehydrogenase, catalytic domain];PF00670.16|AdoHcyase_NAD[S-adenosyl-L-homocysteine hydrolase, NAD binding domain];PF02826.14|2-Hacid_dh_C[D-isomer specific 2-hydroxyacid dehydrogenase, NAD binding domain];PF03446.10|NAD_binding_2[NAD binding domain of 6-phosphogluconate dehydrogenase]	EC:1.1.1.95[Phosphoglycerate dehydrogenase.]	EC:1.1.1.95;GO:0016597;GO:0005829;GO:0006564;GO:0051287;GO:0055114;GO:0004617	ko00680[Methane metabolism]	.	C1_12030W_A	SER33
B9J08_003514	MET15	Amb	3.58319	0.000184595	-0.0902155	1	2.51519	0.0107794	-0.806537	1	protein MET17	PF00155.16|Aminotran_1_2[Aminotransferase class I and II];PF01041.12|DegT_DnrJ_EryC1[DegT/DnrJ/EryC1/StrS aminotransferase family];PF00266.14|Aminotran_5[Aminotransferase class-V];PF01053.15|Cys_Met_Meta_PP[Cys/Met metabolism PLP-dependent enzyme];PF02347.11|GDC-P[Glycine cleavage system P-protein]	.	GO:0003961;GO:0004124;GO:0071266;GO:0005737;GO:0030446;EC:2.5.1.49;EC:2.5.1.47;GO:0019344;GO:0030170	.	.	C4_00200C_A	MET15
B9J08_000136	RPL38	Amb	3.22147	0.000194252	0.119407	1	2.67885	0.00235562	-0.00958777	1	hypothetical protein	PF01781.13|Ribosomal_L38e[Ribosomal L38e protein family]	.	GO:0006412;GO:0022625;GO:0003735	.	.	C2_00210W_A	RPL38
B9J08_000351	ARC1	Amb	2.6857	0.000202724	0.378766	1	2.22663	0.00294304	0.221074	1	methionine-tRNA ligase%2C beta subunit	PF01588.15|tRNA_bind[Putative tRNA binding domain]	.	GO:0051351;GO:0004825;GO:0032266;GO:0000049;GO:0017102;GO:0080025;GO:0006418;GO:0008047;EC:6.1.1.10	.	.	CR_03060W_A	ARC1
B9J08_002126	GDA1	Amb	2.48449	0.000202724	0.394543	1	2.16274	0.00181585	0.259109	1	hypothetical protein	PF01150.12|GDA1_CD39[GDA1/CD39 (nucleoside phosphatase) family]	EC:3.6.1.42[Guanosine-diphosphatase.]	EC:3.6.1.6;GO:0045134;GO:0036244;GO:0004382;GO:0036178;GO:0000139;EC:3.6.1.42;GO:0006493;GO:0016021;GO:0009272;GO:0036187	.	TMH:1	C3_06120C_A	GDA1
B9J08_003055	TIF35	Amb	2.78306	0.000221275	0.840624	1	2.48896	0.0014329	0.521951	1	eukaryotic translation initiation factor 3 subunit G	PF14259.1|RRM_6[RNA recognition motif (a.k.a. RRM, RBD, or RNP domain)];PF13893.1|RRM_5[RNA recognition motif. (a.k.a. RRM, RBD, or RNP domain)];PF00076.17|RRM_1[RNA recognition motif. (a.k.a. RRM, RBD, or RNP domain)];PF12353.3|eIF3g[Eukaryotic translation initiation factor 3 subunit G]	.	GO:0005634;GO:0001731;GO:0016282;GO:0043614;GO:0071541;GO:0006446;GO:0003743;GO:0002188;GO:0071540;GO:0005829;GO:0000166;GO:0033290	.	.	C1_14260C_A	TIF35
B9J08_001467	SAM2	Amb	2.68845	0.000227808	0.057091	1	2.35489	0.00250622	-0.304796	1	S-adenosylmethionine synthase	TIGR01034[metK: methionine adenosyltransferase];PF00438.15|S-AdoMet_synt_N[S-adenosylmethionine synthetase, N-terminal domain];PF02773.11|S-AdoMet_synt_C[S-adenosylmethionine synthetase, C-terminal domain];PF02772.11|S-AdoMet_synt_M[S-adenosylmethionine synthetase, central domain]	EC:2.5.1.6[Methionine adenosyltransferase.]	GO:0005634;GO:0005524;GO:0006730;EC:2.5.1.6;GO:0046872;GO:0006555;GO:0005829;GO:0004478;GO:0006556	.	.	C1_11450C_A	SAM2
B9J08_002469	CPA2	Amb	3.09103	0.000231463	-0.305456	1	2.0885	0.0185006	-0.811633	1	carbamoyl-phosphate synthase arginine-specific large chain	TIGR01369[CPSaseII_lrg: carbamoyl-phosphate synthase, large subunit];PF07478.8|Dala_Dala_lig_C[D-ala D-ala ligase C-terminus];PF00289.17|CPSase_L_chain[Carbamoyl-phosphate synthase L chain, N-terminal domain];PF02787.14|CPSase_L_D3[Carbamoyl-phosphate synthetase large chain, oligomerisation domain];PF13535.1|ATP-grasp_4[ATP-grasp domain];PF02786.12|CPSase_L_D2[Carbamoyl-phosphate synthase L chain…	EC:6.3.5.5[Carbamoyl-phosphate synthase (glutamine-hydrolyzing).]	GO:0006541;GO:0046872;GO:0005524;GO:0016740;GO:0005739;GO:0004088;EC:6.3.5.5	ko00250[Alanine, aspartate and glutamate metabolism]	.	CR_01330W_A	CPA2
B9J08_003582	RPS42	Amb	3.3421	0.000235487	0.538397	1	2.55176	0.00601774	0.122317	1	40S ribosomal protein S4	PF01479.20|S4[S4 domain];PF00900.15|Ribosomal_S4e[Ribosomal family S4e];PF08071.7|RS4NT[RS4NT (NUC023) domain];PF00467.24|KOW[KOW motif]	GO:0005840;GO:0006412;GO:0003735;GO:0019843	.	.	.	C1_01640W_A	RPS42
B9J08_005247	HIS1	Amb	3.06554	0.000250971	-0.216497	1	2.31935	0.00941905	-1.53649	1	ATP phosphoribosyltransferase	PF01634.13|HisG[ATP phosphoribosyltransferase];PF08029.6|HisG_C[HisG, C-terminal domain];TIGR03455[HisG_C-term: ATP phosphoribosyltransferase, C-terminal domain];TIGR00070[hisG: ATP phosphoribosyltransferase];PF09084.6|NMT1[NMT1/THI5 like]	EC:2.4.2.17[ATP phosphoribosyltransferase.]	GO:0000287;GO:0005524;EC:2.4.2.17;GO:0000105;GO:0003879;GO:0005829	.	.	C5_05320C_A	HIS1
B9J08_005458	ASC1	Amb	3.49887	0.000253741	0.251013	1	2.74	0.00505362	-0.0392327	1	guanine nucleotide-binding protein subunit beta-like protein	PF00400.27|WD40[WD domain, G-beta repeat]	.	GO:0060733;GO:0010255;GO:0000747;GO:0036244;GO:0036170;GO:0031139;GO:0035556;GO:0031954;GO:0005092;GO:0036178;GO:0001403;GO:0017148;GO:0004871;GO:0043022;GO:0007186;GO:0036180;GO:0032995;GO:0050790;GO:0005080;GO:0007155;GO:0001965;GO:0034613;GO:0022627;GO:0009405	.	.	C7_01250W_A	ASC1
B9J08_002367	RPL9B	Amb	3.76781	0.00026318	0.445044	1	3.06666	0.00384245	-0.0803023	1	60S ribosomal protein L9-B	PF00347.18|Ribosomal_L6[Ribosomal protein L6]	.	GO:0005840;GO:0006412;GO:0003735;GO:0019843	.	.	C3_02470C_A	RPL9B
B9J08_001589	.	Amb	2.88898	0.000267171	0.482507	1	2.4253	0.00527094	0.305098	1	hypothetical protein	PF03690.8|UPF0160[Uncharacterised protein family (UPF0160)]	.	GO:0005634;GO:0005737	.	.	C1_01910W_A	.
B9J08_002991	.	Amb	2.89891	0.000274486	0.637807	1	2.7433	0.0032199	0.225078	1	hypothetical protein	PF06172.6|Cupin_5[Cupin superfamily (DUF985)]	.	.	.	.	.	.
B9J08_002152	TMA19	Amb	3.11296	0.00027731	0.533041	1	2.70137	0.0024599	0.0921664	1	hypothetical protein	PF00838.12|TCTP[Translationally controlled tumour protein]	.	GO:0005874;GO:0034599;GO:0005829;GO:0002181;GO:0097311;GO:0005739;GO:0055114;GO:0016491	.	.	CR_00860C_A	TMA19
B9J08_000102	SSB1	Amb	3.32584	0.000280907	0.636877	1	2.43911	0.00995555	0.0828325	1	heat shock protein SSB1	PF00012.15|HSP70[Hsp70 protein];PF06723.8|MreB_Mbl[MreB/Mbl protein]	.	GO:0044416;GO:0009986;GO:0005524;GO:0030445;GO:0005829;GO:0044182;GO:0006412;GO:0005886	ko04144[Endocytosis];ko04010[MAPK signaling pathway];ko05162[Measles];ko04141[Protein processing in endoplasmic reticulum];ko04612[Antigen processing and presentation];ko05145[Toxoplasmosis]	.	CR_08090W_A	SSB1
B9J08_004958	RPL6	Amb	3.24682	0.000296617	0.675053	1	2.57183	0.00294304	0.14843	1	60S ribosomal protein L6-B	PF01159.14|Ribosomal_L6e[Ribosomal protein L6e]	.	GO:0005730;GO:0002181;GO:0000027;GO:0022625;GO:0003735	.	.	C1_03110W_A	RPL6
B9J08_003432	PRT1	Amb	2.95826	0.000311985	0.257489	1	2.55385	0.00258282	-0.0811071	1	eukaryotic translation initiation factor 3 subunit B	PF08662.6|eIF2A[Eukaryotic translation initiation factor eIF2A]	.	GO:0010494;GO:0035690;GO:0031369;GO:0001731;GO:0009277;GO:0016282;GO:0043614;GO:0071541;GO:0006446;GO:0003743;GO:0071540;GO:0000166;GO:0005829;GO:0033290	.	.	C7_01450C_A	PRT1
B9J08_001974	RPS3	Amb	3.60217	0.000312791	0.869241	1	2.64709	0.00923634	0.138547	1	40S ribosomal protein S3	TIGR01008[rpsC_E_A: ribosomal protein S3];PF07650.12|KH_2[KH domain];PF00189.15|Ribosomal_S3_C[Ribosomal protein S3, C-terminal domain]	.	GO:0003906;GO:0003723;GO:0006407;GO:0000056;EC:4.2.99.18;GO:0006412;GO:0030688;GO:0022627;GO:0003735;GO:0000737	.	.	CR_04810W_A	RPS3
B9J08_000975	FRS2	Amb	2.39165	0.000312791	0.118411	1	1.9885	0.00253065	-0.596519	1	phenylalanine-tRNA ligase%2C alpha subunit	TIGR00468[pheS: phenylalanine--tRNA ligase, alpha subunit];PF00587.20|tRNA-synt_2b[tRNA synthetase class II core domain (G, H, P, S and T)];PF01409.15|tRNA-synt_2d[tRNA synthetases class II core domain (F)]	EC:6.1.1.20[Phenylalanine--tRNA ligase.]	GO:0006432;GO:0004826;GO:0005524;GO:0005829;GO:0000049;GO:0009328;EC:6.1.1.20	.	.	C1_02710W_A	FRS2
B9J08_001105	MCM6	Amb	2.72912	0.00033043	1.04724	1	2.08956	0.0083621	1.40857	1	hypothetical protein	PF01078.16|Mg_chelatase[Magnesium chelatase, subunit ChlI];PF00493.18|MCM[MCM2/3/5 family];PF14551.1|MCM_N[MCM N-terminal domain]	.	GO:0003688;GO:0005524;GO:0006268;GO:0005737;GO:0031298;GO:0009378;GO:0005656;GO:0042555;GO:0000727;GO:0006270;GO:0043142;GO:0006271;GO:0031261;GO:0006267;GO:0097373;GO:0043140	ko04113[Meiosis - yeast];ko04111[Cell cycle - yeast];ko04110[Cell cycle]	.	CR_02110W_A	MCM6
B9J08_002345	EGD2	Amb	2.86422	0.000348993	0.481951	1	2.0816	0.0107794	0.00136145	1	nascent polypeptide-associated complex subunit alpha	PF01849.13|NAC[NAC domain]	.	GO:0005634;GO:0070300;GO:0032266;GO:0051083;GO:0009986;GO:0080025;GO:0005854;GO:0051082;GO:0070273;GO:0006620	.	.	C3_04140C_A	EGD2
B9J08_001803	NOP1	Amb	3.2719	0.000363851	0.510759	1	3.06491	0.00165971	0.280398	1	rRNA 2'-O-methyltransferase fibrillarin	PF01269.12|Fibrillarin[Fibrillarin];PF08704.5|GCD14[tRNA methyltransferase complex GCD14 subunit]	EC:2.1.1.-[Methyltransferases.]	GO:1990259;GO:0005840;GO:0003723;GO:0030686;GO:0031428;GO:0006356;GO:0008033;GO:0031167;GO:0000228;GO:0032040;GO:0000494;GO:0008649;GO:1990258	.	.	C4_06720W_A	NOP1
B9J08_000955	.	Amb	3.49101	0.000387907	0.581129	1	2.60544	0.00602738	0.139457	1	ribosomal protein L24	TIGR01080[rplX_A_E: ribosomal protein L24]	.	GO:0015934;GO:0005730;GO:0005829;GO:0006412;GO:0003735	.	.	C1_02330C_A	.
B9J08_004956	RPS1	Amb	3.38152	0.000387907	0.562445	1	2.38999	0.0154858	0.146196	1	40S ribosomal protein S1-A	PF01015.13|Ribosomal_S3Ae[Ribosomal S3Ae family]	.	GO:0030446;GO:0006412;GO:0003735;GO:0022627	.	.	C1_03090W_A	RPS1
B9J08_000226	GBP2	Amb	2.91499	0.000389571	0.70084	1	2.32731	0.00523947	0.193502	1	hypothetical protein	PF14259.1|RRM_6[RNA recognition motif (a.k.a. RRM, RBD, or RNP domain)];PF13893.1|RRM_5[RNA recognition motif. (a.k.a. RRM, RBD, or RNP domain)];PF00076.17|RRM_1[RNA recognition motif. (a.k.a. RRM, RBD, or RNP domain)]	.	GO:0000166;GO:0003676	.	.	C7_00440C_A	GBP2
B9J08_001135	.	Amb	2.67818	0.000389905	0.592755	1	2.58298	0.00165971	0.750777	1	deoxyhypusine hydroxylase	PF03130.11|HEAT_PBS[PBS lyase HEAT-like repeat];PF13646.1|HEAT_2[HEAT repeats]	EC:1.14.99.29[Deoxyhypusine monooxygenase.]	GO:0000226;GO:0005634;GO:0019135;GO:0055114;GO:0008612;GO:0005737;GO:0036178;GO:0016829;GO:0046872;EC:1.14.99.29;GO:0044011	.	.	C2_07290W_A	.
B9J08_004574	.	Amb	3.56025	0.000414628	0.479044	1	2.7916	0.00713329	-0.0285963	1	60S ribosomal protein L7	PF00327.15|Ribosomal_L30[Ribosomal protein L30p/L7e];PF08079.7|Ribosomal_L30_N[Ribosomal L30 N-terminal domain]	.	GO:0005840;GO:0009986	.	.	C1_05720W_A	.
B9J08_002225	PRI2	Amb	2.82049	0.000429402	0.254293	1	2.27993	0.0100422	0.311691	1	hypothetical protein	PF04104.9|DNA_primase_lrg[Eukaryotic and archaeal DNA primase, large subunit]	EC:2.7.7.-[Nucleotidyltransferases.]	GO:0003677;GO:0006269;GO:0003896;GO:0005635;GO:0006302;GO:0003887;GO:0046872;GO:0071897;GO:0005829;GO:0051539;GO:0005658;EC:2.7.7.7;GO:1990077	ko03030[DNA replication];ko00240[Pyrimidine metabolism]	.	C4_06490C_A	PRI2
B9J08_002351	MET3	Amb	3.17442	0.000438516	-0.150477	1	1.70402	0.0312445	-1.65086	1	sulfate adenylyltransferase	PF01747.12|ATP-sulfurylase[ATP-sulfurylase];PF14306.1|PUA_2[PUA-like domain];TIGR00339[sopT: sulfate adenylyltransferase]	EC:2.7.7.4[Sulfate adenylyltransferase.]	EC:2.7.7.4;GO:0005524;GO:0070814;GO:0019344;GO:0019379;GO:0005739;GO:0004781;GO:0009086	ko00450[Selenocompound metabolism];ko00920[Sulfur metabolism]	.	C1_13870W_A	MET3
B9J08_001917	CAM1	Amb	2.83879	0.000438516	0.464204	1	2.15901	0.00928463	-0.112166	1	hypothetical protein	PF14497.1|GST_C_3[Glutathione S-transferase, C-terminal domain];PF13410.1|GST_C_2[Glutathione S-transferase, C-terminal domain];PF00043.20|GST_C[Glutathione S-transferase, C-terminal domain];PF00647.14|EF1G[Elongation factor 1 gamma, conserved domain]	.	GO:0004364;GO:0006749;GO:0005634;GO:0003746;GO:0006414;EC:2.5.1.18;GO:0005737	.	.	C3_06010W_A	CAM1
B9J08_005253	RPL37B	Amb	3.09226	0.000457482	0.347664	1	2.56918	0.00258282	-0.00523828	1	60S ribosomal protein L37-B	PF01907.14|Ribosomal_L37e[Ribosomal protein L37e]	.	GO:0005840;GO:0046872;GO:0006412;GO:0003735;GO:0019843	.	.	C1_11360W_A	RPL37B
B9J08_000686	ARG1	Amb	2.63472	0.0004776	-0.402878	1	1.9416	0.0450234	-0.462498	1	argininosuccinate synthase	PF00764.14|Arginosuc_synth[Arginosuccinate synthase];PF06508.8|QueC[Queuosine biosynthesis protein QueC];TIGR00032[argG: argininosuccinate synthase];PF00733.16|Asn_synthase[Asparagine synthase]	EC:6.3.4.5[Argininosuccinate synthase.]	GO:0005524;EC:6.3.4.5;GO:0004055;GO:0005829;GO:0006526	ko00330[Arginine and proline metabolism]	.	CR_00620C_A	ARG1
B9J08_001675	DNA2	Amb	2.5626	0.000495256	0.20215	1	2.43284	0.00146485	0.183268	1	hypothetical protein	PF13604.1|AAA_30[AAA domain];PF13086.1|AAA_11[AAA domain];PF13245.1|AAA_19[Part of AAA domain];PF13087.1|AAA_12[AAA domain];PF00580.16|UvrD-helicase[UvrD/REP helicase N-terminal domain];PF08696.6|Dna2[DNA replication factor Dna2]	EC:3.6.4.12[DNA helicase.]	GO:0000784;GO:0000733;GO:0000706;GO:0032508;GO:0005737;GO:0051539;GO:0000737;GO:0017108;GO:0000014;GO:0043142;GO:0004003;GO:0043139;GO:0035861;GO:0006273;GO:0001302;GO:0000723	.	.	C6_00320C_A	DNA2
B9J08_005205	AXL2	Amb	2.63779	0.000496473	0.53361	1	2.28845	0.00258282	1.0302	1	hypothetical protein	PF05345.7|He_PIG[Putative Ig domain]	.	GO:0005887;GO:0005509;GO:0005940;GO:0005935;GO:0007120	.	TMH:1	C4_04170C_A	AXL2
B9J08_004324	.	Amb	2.29975	0.000559815	-0.176123	1	1.85195	0.00653392	-0.142592	1	hypothetical protein	PF00324.16|AA_permease[Amino acid permease];PF13520.1|AA_permease_2[Amino acid permease]	.	GO:0003333;GO:0016021;GO:0015171	.	TMH:11	C1_06000W_A	.
B9J08_004262	CDC45	Amb	2.99599	0.000559815	0.231194	1	2.90438	0.00226405	0.35659	1	hypothetical protein	PF02724.9|CDC45[CDC45-like protein]	.	GO:0003688;GO:1902977;GO:0000727;GO:0006270;GO:0000790;GO:0031261;GO:0031938;GO:0006267;GO:0003697;GO:0031298;GO:0005656;GO:0005829;GO:0003682	ko04113[Meiosis - yeast];ko04111[Cell cycle - yeast]	.	CR_07720C_A	CDC45
B9J08_002231	PDC11	Amb	3.01052	0.000564599	0.284593	1	2.30821	0.0107434	-0.157782	1	pyruvate decarboxylase	PF02776.13|TPP_enzyme_N[Thiamine pyrophosphate enzyme, N-terminal TPP binding domain];PF02775.16|TPP_enzyme_C[Thiamine pyrophosphate enzyme, C-terminal TPP binding domain];PF00205.17|TPP_enzyme_M[Thiamine pyrophosphate enzyme, central domain]	EC:4.1.1.1[Pyruvate decarboxylase.]	GO:0004737;GO:0000287;GO:0009986;GO:0030976;EC:4.1.1.1	.	.	C4_06570C_A	PDC11
B9J08_004493	.	Amb	2.99107	0.000582276	0.530165	1	2.12637	0.0138239	0.137072	1	hypothetical protein	PF12807.2|eIF3_p135[Translation initiation factor eIF3 subunit 135];PF13236.1|CLU[Clustered mitochondria];PF15044.1|CLU_N[Mitochondrial function, CLU-N-term];PF13424.1|TPR_12[Tetratricopeptide repeat]	.	GO:0009987;GO:0005737	.	.	C1_04970W_A	.
B9J08_000554	RPL25	Amb	3.66327	0.000582276	0.404833	1	3.18127	0.00358922	-0.0367775	1	60S ribosomal protein L25	PF00276.15|Ribosomal_L23[Ribosomal protein L23];PF03939.8|Ribosomal_L23eN[Ribosomal protein L23, N-terminal domain]	.	GO:0000166;GO:0006412;GO:0000027;GO:0022625;GO:0003735;GO:0019843	.	.	C6_01970C_A	RPL25
B9J08_005340	ERG6	Amb	2.67573	0.000583338	0.323372	1	1.89093	0.00938366	0.412881	1	sterol 24-C-methyltransferase	PF12847.2|Methyltransf_18[Methyltransferase domain];PF13659.1|Methyltransf_26[Methyltransferase domain];PF08242.7|Methyltransf_12[Methyltransferase domain];PF13649.1|Methyltransf_25[Methyltransferase domain];PF08241.7|Methyltransf_11[Methyltransferase domain];PF01209.13|Ubie_methyltran[ubiE/COQ5 methyltransferase family];PF13489.1|Methyltransf_23[Methyltransferase domain];PF09445.5|Methyltransf_1…	EC:2.1.1.41[Sterol 24-C-methyltransferase.]	GO:0003838;GO:0035690;GO:0006696;GO:0032259;GO:0005886;EC:2.1.1.41	.	.	C3_02150C_A	ERG6
B9J08_000632	UBI3	Amb	3.02116	0.000587036	0.534152	1	2.32999	0.00991219	0.0870898	1	ubiquitin-40S ribosomal protein S27a	PF11976.3|Rad60-SLD[Ubiquitin-2 like Rad60 SUMO-like];PF01599.14|Ribosomal_S27[Ribosomal protein S27a];PF00240.18|ubiquitin[Ubiquitin family];PF14560.1|Ubiquitin_2[Ubiquitin-like domain]	.	GO:0031386;GO:0000028;GO:0046872;GO:0005634;GO:0002181;GO:0002109;GO:0003735;GO:0022627	.	.	C4_07180W_A	UBI3
B9J08_001735	.	Amb	2.33907	0.000596501	0.635362	1	1.80778	0.0128342	0.379003	1	hypothetical protein	PF10516.4|SHNi-TPR[SHNi-TPR]	.	GO:0043229;GO:0006325	.	.	C1_04490W_A	.
B9J08_001870	RPS13	Amb	2.62736	0.000596501	0.121479	1	2.78311	0.0010178	0.0767741	1	40S ribosomal protein S13	PF00312.17|Ribosomal_S15[Ribosomal protein S15];PF08069.7|Ribosomal_S13_N[Ribosomal S13/S15 N-terminal domain]	.	GO:0000462;GO:0030686;GO:0070181;GO:0005730;GO:0002181;GO:0003735;GO:0022627	.	.	C6_00650C_A	RPS13
B9J08_003755	RPS15	Amb	3.24973	0.000606266	0.40454	1	2.61043	0.00557565	0.155269	1	40S ribosomal protein S15	TIGR01025[rpsS_arch: ribosomal protein S19];PF00203.16|Ribosomal_S19[Ribosomal protein S19]	.	GO:0003723;GO:0006407;GO:0006412;GO:0003735;GO:0015935	.	.	C3_04670C_A	RPS15
B9J08_001883	DLD2	Amb	2.81205	0.000621687	-0.0104655	1	2.63749	0.00294304	-0.593702	1	glycolate oxidase%2C subunit GlcD	PF02913.14|FAD-oxidase_C[FAD linked oxidases, C-terminal domain];PF01565.18|FAD_binding_4[FAD binding domain]	EC:1.1.2.4[D-lactate dehydrogenase (cytochrome).]	EC:1.1.2.4;GO:0004458;GO:0050660;GO:0016021;GO:0055114	.	.	C3_07360W_A	DLD2
B9J08_001606	ADE5,7	Amb	2.33684	0.000621687	0.0341351	1	1.61675	0.0208878	-0.332025	1	phosphoribosylamine-glycine ligase	PF02769.17|AIRS_C[AIR synthase related protein, C-terminal domain];PF02844.10|GARS_N[Phosphoribosylglycinamide synthetase, N domain];PF13535.1|ATP-grasp_4[ATP-grasp domain];PF01071.14|GARS_A[Phosphoribosylglycinamide synthetase, ATP-grasp (A) domain];TIGR00878[purM: phosphoribosylformylglycinamidine cyclo-ligase];PF00586.19|AIRS[AIR synthase related protein, N-terminal domain];TIGR00877[purD: pho…	EC:6.3.4.13[Phosphoribosylamine--glycine ligase.];EC:6.3.3.1[Phosphoribosylformylglycinamidine cyclo-ligase.]	GO:0005524;GO:0009113;EC:6.3.4.13;GO:0006189;GO:0005737;GO:0046872;GO:0004641;GO:0004637;EC:6.3.3.1	.	.	C1_07890C_A	ADE5,7
B9J08_002629	ILV2	Amb	2.59067	0.000634794	-0.179767	1	1.88511	0.0138079	-1.39732	1	acetolactate synthase%2C large subunit%2C biosynthetic type	TIGR00118[acolac_lg: acetolactate synthase, large subunit, biosynthetic type];PF02776.13|TPP_enzyme_N[Thiamine pyrophosphate enzyme, N-terminal TPP binding domain];PF02775.16|TPP_enzyme_C[Thiamine pyrophosphate enzyme, C-terminal TPP binding domain];PF00205.17|TPP_enzyme_M[Thiamine pyrophosphate enzyme, central domain]	EC:2.2.1.6[Acetolactate synthase.]	GO:0009099;GO:0000287;GO:0005948;EC:2.2.1.6;GO:0050660;GO:0009097;GO:0030976;GO:0003984	ko00770[Pantothenate and CoA biosynthesis];ko00660[C5-Branched dibasic acid metabolism];ko00650[Butanoate metabolism]	.	C3_02320W_A	ILV2
B9J08_001266	MVD	Amb	2.17986	0.000679654	-0.0829782	1	1.8495	0.00745036	-0.322767	1	diphosphomevalonate decarboxylase	PF00288.21|GHMP_kinases_N[GHMP kinases N terminal domain];TIGR01240[mevDPdecarb: diphosphomevalonate decarboxylase]	EC:4.1.1.33[Diphosphomevalonate decarboxylase.]	GO:0016126;GO:0019287;GO:0005524;GO:0005829;EC:4.1.1.33;GO:0004163	.	.	C1_00070W_A	MVD
B9J08_004579	TEF2	Amb	2.92444	0.000700848	0.583988	1	2.32291	0.00862341	0.100228	1	elongation factor 1-alpha 2	TIGR00483[EF-1_alpha: translation elongation factor EF-1, subunit alpha];PF03143.12|GTP_EFTU_D3[Elongation factor Tu C-terminal domain];PF00009.22|GTP_EFTU[Elongation factor Tu GTP binding domain];PF03144.20|GTP_EFTU_D2[Elongation factor Tu domain 2]	.	GO:0003746;GO:0006414;GO:0005737;GO:0003924;GO:0030446;GO:0009986;GO:0030445;GO:0005515;GO:0051701;GO:0005525	.	.	C1_08380W_A	TEF2
B9J08_000816	YNK1	Amb	3.12499	0.000703632	0.300376	1	2.23237	0.0167315	-0.0130291	1	nucleoside diphosphate kinase	PF00334.14|NDK[Nucleoside diphosphate kinase]	EC:2.7.4.6[Nucleoside-diphosphate kinase.]	GO:0005634;GO:0005524;GO:0006241;GO:0042802;GO:0005758;GO:0004550;GO:0006228;EC:2.7.4.6;GO:0005829;GO:0061508;GO:0006974;GO:0006183	ko00240[Pyrimidine metabolism]	.	C5_02890W_A	YNK1
B9J08_003437	PRX1	Amb	3.35656	0.000709183	-0.363007	1	1.89935	0.0509951	-1.51691	1	hypothetical protein	PF08534.5|Redoxin[Redoxin];PF10417.4|1-cysPrx_C[C-terminal domain of 1-Cys peroxiredoxin];PF00578.16|AhpC-TSA[AhpC/TSA family]	.	EC:1.11.1.15;GO:0098869;GO:0004601;EC:1.11.1.7;GO:0055114;GO:0051920	.	.	C7_02810W_A	PRX1
B9J08_001878	KRS1	Amb	2.89801	0.000750296	0.389804	1	2.18145	0.0127284	-0.19412	1	lysine-tRNA ligase%2C cytoplasmic	TIGR00499[lysS_bact: lysine--tRNA ligase];PF00152.15|tRNA-synt_2[tRNA synthetases class II (D, K and N)];PF01336.20|tRNA_anti-codon[OB-fold nucleic acid binding domain]	EC:6.1.1.6[Lysine--tRNA ligase.]	GO:0006430;GO:0005524;EC:6.1.1.6;GO:0004824;GO:0005737;GO:0003676	.	.	C3_07410C_A	KRS1
B9J08_002638	.	Amb	2.49338	0.000787048	0.295652	1	2.15992	0.00846513	-0.0113554	1	deoxyhypusine synthase	TIGR00321[dhys: deoxyhypusine synthase];PF01916.12|DS[Deoxyhypusine synthase]	EC:2.5.1.46[Deoxyhypusine synthase.]	GO:0005634;GO:0005829;GO:0008612;GO:0034038;EC:2.5.1.46	.	.	C3_02180C_A	.
B9J08_003610	TEF2	Amb	3.0704	0.000801627	0.521066	1	2.1832	0.0201036	0.00841637	1	elongation factor 1-alpha 2	TIGR00483[EF-1_alpha: translation elongation factor EF-1, subunit alpha];PF03143.12|GTP_EFTU_D3[Elongation factor Tu C-terminal domain];PF00009.22|GTP_EFTU[Elongation factor Tu GTP binding domain];PF03144.20|GTP_EFTU_D2[Elongation factor Tu domain 2]	.	GO:0003746;GO:0006414;GO:0005737;GO:0003924;GO:0030446;GO:0009986;GO:0030445;GO:0005515;GO:0051701;GO:0005525	.	.	C1_08380W_A	TEF2
B9J08_003100	.	Amb	2.41566	0.000833533	0.16381	1	2.04417	0.00846513	-0.169507	1	hypothetical protein	PF13483.1|Lactamase_B_3[Beta-lactamase superfamily domain];PF07521.7|RMMBL[RNA-metabolising metallo-beta-lactamase];PF00753.22|Lactamase_B[Metallo-beta-lactamase superfamily];PF11718.3|CPSF73-100_C[Pre-mRNA 3'-end-processing endonuclease polyadenylation factor C-term];PF12706.2|Lactamase_B_2[Beta-lactamase superfamily domain];PF10996.3|Beta-Casp[Beta-Casp domain]	EC:3.1.27.-[Endoribonucleases producing other than 5'-phosphomonoesters.]	GO:0042493;GO:0034247;GO:0005847;GO:0006369;GO:0006378;GO:0004521;GO:0046872;GO:0005829;GO:0090502;GO:0031126;GO:0006379	.	.	C2_06230W_A	.
B9J08_002718	RPL24A	Amb	2.97684	0.000863089	0.6295	1	2.35989	0.0102188	0.032887	1	60S ribosomal protein L24	PF01246.15|Ribosomal_L24e[Ribosomal protein L24e]	.	GO:0005840	.	.	C4_04890C_A	RPL24A
B9J08_000384	PHR2	Amb	3.02725	0.000886389	0.477179	1	2.34001	0.0131086	-0.0670562	1	hypothetical protein	PF07983.8|X8[X8 domain];PF02836.12|Glyco_hydro_2_C[Glycosyl hydrolases family 2, TIM barrel domain];PF03198.9|Glyco_hydro_72[Glucanosyltransferase]	GO:0043231;GO:0042124;GO:0031505;GO:0030446;GO:0009986;GO:0030445;GO:0016021;GO:0005975;GO:0046658;GO:0009405;GO:0044444	.	.	.	C1_00220W_A	PHR2
B9J08_001703	BUD5	Amb	2.25159	0.000940288	0.256952	1	1.9407	0.00523947	0.331684	1	hypothetical protein	PF00618.15|RasGEF_N[RasGEF N-terminal motif];PF00617.14|RasGEF[RasGEF domain];PF00018.23|SH3_1[SH3 domain]	.	GO:0065007	.	.	CR_06910W_A	BUD5
B9J08_002813	CEF3	Amb	3.24339	0.000989809	0.489824	1	2.65029	0.00936481	0.113387	1	elongation factor 3	PF00005.22|ABC_tran[ABC transporter]	.	GO:0005524;GO:0003746;EC:3.6.1.3;GO:0006414;GO:0005737;GO:0016887	.	.	C5_01580C_A	CEF3
B9J08_000425	.	Amb	2.56254	0.000989809	0.255971	1	2.37339	0.00336578	0.249695	1	hypothetical protein	PF01535.15|PPR[PPR repeat];PF13812.1|PPR_3[Pentatricopeptide repeat domain]	.	.	.	.	C5_01140C_A	.
B9J08_000346	RPL28	Amb	2.67492	0.000989809	0.229716	1	1.80896	0.0294312	0.194765	1	60S ribosomal protein L28	PF00828.14|Ribosomal_L18e[Ribosomal protein L18e/L15]	.	GO:0003723;GO:0005634;GO:0015934;GO:0006412;GO:0003735	.	.	CR_03030C_A	RPL28
B9J08_003288	RPS28B	Amb	4.62064	2.88735e-08	0.715251	1	3.68302	6.77393e-05	-0.328986	1	40S ribosomal protein S28-A	PF01200.13|Ribosomal_S28e[Ribosomal protein S28e]	.	GO:0006407;GO:0006412;GO:0003735;GO:0022627;GO:1900153	.	.	C7_00710W_A	RPS28B
B9J08_002719	RPL30	Amb	4.24411	1.90352e-06	0.286803	1	3.33728	0.000186128	0.00713617	1	60S ribosomal protein L30	PF01248.21|Ribosomal_L7Ae[Ribosomal protein L7Ae/L30e/S12e/Gadd45 family]	.	GO:0005840;GO:0006412;GO:0030627;GO:0048025;GO:0003735;GO:0006364	.	.	C4_04900W_A	RPL30
B9J08_000998	RPS21B	Amb	3.7058	1.90352e-06	0.497801	1	3.28247	3.35001e-05	0.207904	1	40S ribosomal protein S21	PF01249.13|Ribosomal_S21e[Ribosomal protein S21e]	.	GO:0005840;GO:0005634;GO:0005829;GO:0006412;GO:0042274;GO:0003735;GO:0006364	.	.	C1_01370C_A	RPS21B
B9J08_004434	RPL82	Amb	4.76825	1.90352e-06	0.596338	1	3.52625	0.000228578	0.105328	1	60S ribosomal protein L8-B	PF01248.21|Ribosomal_L7Ae[Ribosomal protein L7Ae/L30e/S12e/Gadd45 family]	.	GO:0005840;GO:0042254	.	.	C1_11030W_A	RPL82
B9J08_002742	URA1	Amb	3.66333	1.90352e-06	0.304235	1	3.06245	0.000241283	-0.288673	1	dihydroorotate dehydrogenase (quinone)%2C mitochondrial	PF01180.16|DHO_dh[Dihydroorotate dehydrogenase];TIGR01036[pyrD_sub2: dihydroorotate dehydrogenase (fumarate)]	EC:1.3.98.1[Dihydroorotate oxidase (fumarate).]	GO:0004158;GO:0044205;GO:0031304;GO:0016021;GO:0006207;GO:0055114;EC:1.3.3.1	.	TMH:1	C1_09720W_A	URA1
B9J08_004146	RPL14	Amb	3.87686	1.90352e-06	0.336695	1	3.43703	6.69765e-05	0.201358	1	hypothetical protein	PF01929.12|Ribosomal_L14e[Ribosomal protein L14]	.	GO:0005840;GO:0005634;GO:0005829;GO:0006412;GO:0003735	.	.	C1_13050W_A	RPL14
B9J08_003248	RPS16A	Amb	3.74123	1.90813e-06	0.489565	1	3.14345	0.000116159	0.234502	1	40S ribosomal protein S16	PF00380.14|Ribosomal_S9[Ribosomal protein S9/S16]	.	GO:0005840;GO:0006412;GO:0003735	.	.	C1_03030W_A	RPS16A
B9J08_000209	RPP1B	Amb	3.39835	1.90813e-06	0.146212	1	2.47485	0.000627775	-0.309002	1	60S acidic ribosomal protein P1-B	PF00428.14|Ribosomal_60s[60s Acidic ribosomal protein]	.	GO:0002181;GO:0022625;GO:0006414;GO:0003735	.	.	C7_03920C_A	RPP1B
B9J08_003089	RPS24	Amb	3.9963	1.94957e-06	0.68553	1	3.14571	9.08878e-05	0.151091	1	40S ribosomal protein S24-A	PF01282.14|Ribosomal_S24e[Ribosomal protein S24e]	.	GO:0005840;GO:0000462;GO:0005730;GO:0000166;GO:0005829;GO:0006412;GO:0003735;GO:0005739	.	.	C3_00090W_A	RPS24
B9J08_002753	.	Amb	3.71447	2.28828e-06	0.484866	1	2.60594	0.000318134	-0.041811	1	hypothetical protein	.	.	.	.	.	.	.
B9J08_003634	.	Amb	3.36204	2.70642e-06	0.737315	1	2.58195	0.000312362	0.187452	1	60S ribosomal protein L31-A	PF01198.14|Ribosomal_L31e[Ribosomal protein L31e]	.	GO:0005840;GO:0006412;GO:0003735	.	.	C2_05410W_A	.
B9J08_003756	RPP2B	Amb	4.07886	5.0253e-06	0.142021	1	3.24698	0.000187716	0.134745	1	60S acidic ribosomal protein P2-B	PF00428.14|Ribosomal_60s[60s Acidic ribosomal protein]	.	GO:0032147;GO:0002181;GO:0030295;GO:0022625;GO:0006414;GO:0003735	.	.	C3_04680W_A	RPP2B
B9J08_000605	RPS14B	Amb	3.64915	5.33666e-06	0.940101	1	2.86403	0.000571923	0.0742111	1	40S ribosomal protein S14	PF00411.14|Ribosomal_S11[Ribosomal protein S11]	.	GO:0000462;GO:0030686;GO:0048027;GO:0002181;GO:0000028;GO:0005730;GO:0032040;GO:0070181;GO:0022627;GO:0003735	.	.	C1_06450C_A	RPS14B
B9J08_000727	RPL39	Amb	3.35204	7.37116e-06	0.18613	1	2.83199	0.000187716	-0.0131886	1	60S ribosomal protein L36	PF01158.13|Ribosomal_L36e[Ribosomal protein L36e]	.	GO:0005840;GO:0006412;GO:0003735	.	.	C2_03960W_A	RPL39
B9J08_004943	ERG2	Amb	3.41981	7.37116e-06	-0.0214365	1	3.29798	0.000168478	0.170852	1	hypothetical protein	PF04622.7|ERG2_Sigma1R[ERG2 and Sigma1 receptor like protein]	EC:5.-.-.-[Isomerases.]	GO:0005783;GO:0035690;GO:0000247;GO:0016021;GO:0006696	.	TMH:1	C1_00800C_A	ERG2
B9J08_002732	HET1	Amb	3.20617	9.43194e-06	0.152373	1	3.30545	3.35001e-05	0.0200682	1	hypothetical protein	PF08718.6|GLTP[Glycolipid transfer protein (GLTP)]	.	GO:0017089;GO:0051861;GO:0046836;GO:0009405;GO:0005737	.	.	C6_00100C_A	HET1
B9J08_000771	RPS6A	Amb	4.2183	9.43194e-06	0.867628	1	3.24077	0.000357188	0.0705873	1	40S ribosomal protein S6	PF01092.14|Ribosomal_S6e[Ribosomal protein S6e]	.	GO:0005840;GO:0009986;GO:0030445;GO:0006412;GO:0003735	ko04150[mTOR signaling pathway];ko04910[Insulin signaling pathway]	.	C4_01270W_A	RPS6A
B9J08_004993	DPS1-1	Amb	2.901	1.15953e-05	0.239687	1	2.23984	0.000627775	-0.317997	1	aspartate-tRNA ligase%2C cytoplasmic	TIGR00458[aspS_nondisc: aspartate--tRNA(Asn) ligase];PF00152.15|tRNA-synt_2[tRNA synthetases class II (D, K and N)];PF01336.20|tRNA_anti-codon[OB-fold nucleic acid binding domain]	EC:6.1.1.12[Aspartate--tRNA ligase.]	GO:0006422;GO:0003723;GO:0005634;GO:0005524;EC:6.1.1.12;GO:0005829;GO:0004815	.	.	CR_03170W_A	DPS1-1
B9J08_000965	.	Amb	2.88835	1.29016e-05	0.341478	1	2.66829	0.000187716	0.00862201	1	hypothetical protein	PF08662.6|eIF2A[Eukaryotic translation initiation factor eIF2A]	.	GO:0006413;GO:0003743;GO:0022627	.	.	C1_02430C_B	.
B9J08_005324	YST1	Amb	3.94511	1.4904e-05	0.672948	1	3.12804	0.000895559	0.207991	1	40S ribosomal protein S0	PF00318.15|Ribosomal_S2[Ribosomal protein S2];TIGR01012[Sa_S2_E_A: ribosomal protein S2]	.	GO:0016020;GO:0000028;GO:0006412;GO:0003735;GO:0022627	.	.	C3_05370C_A	YST1
B9J08_002921	.	Amb	3.93975	2.22685e-05	0.753395	1	3.43452	0.00046288	0.198632	1	40S ribosomal protein S11-A	PF00366.15|Ribosomal_S17[Ribosomal protein S17];TIGR03630[arch_S17P: archaeal ribosomal protein S17P]	.	GO:0005840;GO:0006412;GO:000373.	.	.	C5_01540W_A	.
B9J08_003882	ARO4	Amb	3.38833	2.51109e-05	-0.0224199	1	2.83639	0.000606259	-0.958285	1	phospho-2-dehydro-3-deoxyheptonate aldolase%2C tyrosine-inhibited	TIGR00034[aroFGH: 3-deoxy-7-phosphoheptulonate synthase];PF00793.15|DAHP_synth_1[DAHP synthetase I family]	EC:2.5.1.54[3-deoxy-7-phosphoheptulonate synthase.]	EC:2.5.1.54;GO:0009423;GO:0005634;GO:0003849;GO:0009073;GO:0005737	.	.	C1_05110C_A	ARO4
B9J08_000604	.	Amb	3.28918	2.55589e-05	0.421774	1	3.22048	0.000143109	0.126432	1	40S ribosomal protein S22	PF00410.14|Ribosomal_S8[Ribosomal protein S8]	.	GO:0005840;GO:0006412;GO:0003735	.	.	C1_03620C_A	.
B9J08_000142	RPS26A	Amb	3.68009	3.19401e-05	0.433581	1	3.13188	0.000698015	0.113489	1	40S ribosomal protein S26-B	PF01283.14|Ribosomal_S26e[Ribosomal protein S26e]	.	GO:0005840;GO:0006412;GO:0003735	.	.	C2_01610C_A	RPS26A
B9J08_002961	RPS8A	Amb	3.63658	3.50462e-05	0.645167	1	3.03322	0.000971796	0.252476	1	40S ribosomal protein S8-B	PF01201.17|Ribosomal_S8e[Ribosomal protein S8e];TIGR00307[S8e: ribosomal protein S8.e]	.	GO:0000462;GO:0030686;GO:0006412;GO:0003735;GO:0022627	.	.	C2_05610C_A	RPS8A
B9J08_000461	RPS27	Amb	3.05142	4.50548e-05	0.588514	1	2.82332	0.000465265	0.547442	1	40S ribosomal protein S27-B	PF01667.12|Ribosomal_S27e[Ribosomal protein S27]	.	GO:0005840;GO:0046872;GO:0006412;GO:0003735	.	.	CR_07630C_A	RPS27
B9J08_000090	RPL18	Amb	3.65007	4.50548e-05	0.525811	1	3.34624	0.000465265	0.20156	1	60S ribosomal protein L18-A	PF00828.14|Ribosomal_L18e[Ribosomal protein L18e/L15]	.	GO:0005840;GO:0006412;GO:0003735	.	.	C3_05100C_A	RPL18
B9J08_002918	MTS1	Amb	2.84446	5.93716e-05	0.236239	1	2.59869	0.000522948	-0.119735	1	hypothetical protein	PF12847.2|Methyltransf_18[Methyltransferase domain];PF08241.7|Methyltransf_11[Methyltransferase domain];PF02353.15|CMAS[Mycolic acid cyclopropane synthetase];PF13489.1|Methyltransf_23[Methyltransferase domain]	.	GO:0006679;GO:0008168;GO:0030447;GO:0016021;GO:0032259;GO:0009405;GO:0005886	.	TMH:2	C1_09680W_A	MTS1
B9J08_000087	CDC46	Amb	3.1902	6.07578e-05	0.554907	1	2.86864	0.000627775	0.890718	1	hypothetical protein	PF00493.18|MCM[MCM2/3/5 family];PF07728.9|AAA_5[AAA domain (dynein-related subfamily)];PF14551.1|MCM_N[MCM N-terminal domain]	.	GO:0006343;GO:0003688;GO:0030174;GO:0000784;GO:0005524;GO:0032508;GO:0003697;GO:0031298;GO:0005656;GO:0005829;GO:0042555;GO:0003682;GO:0031939;GO:0000727;GO:0051097;GO:0006270;GO:0006348;GO:0031261;GO:0006267;GO:0051301;GO:0003678	ko04113[Meiosis - yeast];ko04111[Cell cycle - yeast];ko04110[Cell cycle]	.	C2_06250C_A	CDC46
B9J08_003620	DIP2	Amb	3.40067	6.13546e-05	0.475185	1	3.79782	1.66379e-05	0.501322	1	hypothetical protein	PF04003.7|Utp12[Dip2/Utp12 Family];PF00400.27|WD40[WD domain, G-beta repeat]	.	GO:0036180;GO:0005634;GO:0036170;GO:0035690;GO:0009267;GO:0032040;GO:0005829	.	.	C1_08290C_A	DIP2
B9J08_003249	RPL13	Amb	3.68127	6.49622e-05	0.515453	1	3.22181	0.000897803	0.238785	1	60S ribosomal protein L13	PF01294.13|Ribosomal_L13e[Ribosomal protein L13e]	.	GO:0005840;GO:0005829;GO:0006412;GO:0003735	.	.	C1_03020C_A	RPL13
B9J08_003017	FCY2	Amb	4.32076	7.9539e-05	0.131538	1	5.09691	9.08878e-05	1.45928	1	hypothetical protein	PF02133.10|Transp_cyt_pur[Permease for cytosine/purines, uracil, thiamine, allantoin]	.	GO:0055085;GO:0016021;GO:0005215	.	TMH:12	C3_03360W_A	FCY2
B9J08_004500	ERG13	Amb	2.65318	8.99466e-05	0.107815	1	2.41383	0.0009167	-0.0118458	1	hydroxymethylglutaryl-CoA synthase	PF01154.12|HMG_CoA_synt_N[Hydroxymethylglutaryl-coenzyme A synthase N terminal];PF08540.5|HMG_CoA_synt_C[Hydroxymethylglutaryl-coenzyme A synthase C terminal];TIGR01833[HMG-CoA-S_euk: hydroxymethylglutaryl-CoA synthase]	EC:2.3.3.10[Hydroxymethylglutaryl-CoA synthase.]	GO:0036180;GO:0004421;GO:0005634;GO:0036170;GO:0035690;GO:0009267;GO:0006696;GO:0010142;EC:2.3.3.10;GO:0005829;GO:0006084;GO:0070317	ko00900[Terpenoid backbone biosynthesis];ko00280[Valine, leucine and isoleucine degradation];ko00650[Butanoate metabolism]	.	CR_09160C_A	ERG13
B9J08_002321	ARX1	Amb	4.06461	9.52576e-05	0.585641	1	5.01078	1.02779e-06	0.616026	1	hypothetical protein	PF00557.19|Peptidase_M24[Metallopeptidase family M24]	EC:3.-.-.-[Hydrolases.]	GO:0000055;GO:0005654;GO:0008233;GO:0005730;GO:0005635;GO:0022625;GO:0030687;GO:0042273	.	.	C1_03230C_A	ARX1
B9J08_002277	RPL35	Amb	3.28949	0.000113053	0.430126	1	3.06321	0.000698015	0.228474	1	hypothetical protein	PF00831.18|Ribosomal_L29[Ribosomal L29 protein];TIGR00012[L29: ribosomal protein L29]	.	GO:0005840;GO:0005730;GO:0005829;GO:0006412;GO:0003735	.	.	C3_04960W_A	RPL35
B9J08_002632	GFA1	Amb	2.52593	0.000181771	0.385916	1	2.45157	0.000627775	-0.426643	1	glutamine-fructose-6-phosphate aminotransferase [isomerizing]	PF13522.1|GATase_6[Glutamine amidotransferase domain];PF13537.1|GATase_7[Glutamine amidotransferase domain];PF00310.16|GATase_2[Glutamine amidotransferases class-II];PF01380.17|SIS[SIS domain];TIGR01135[glmS: glutamine-fructose-6-phosphate transaminase (isomerizing)];PF13230.1|GATase_4[Glutamine amidotransferases class-II]	EC:2.6.1.16[Glutamine--fructose-6-phosphate transaminase (isomerizing).]	EC:2.6.1.16;GO:0035690;GO:0006038;GO:0030448;GO:0006541;GO:0030246;GO:0006048;GO:0006487;GO:0006042;GO:0004360	ko00520[Amino sugar and nucleotide sugar metabolism]	.	C3_02280C_A	GFA1
B9J08_001385	ZUO1	Amb	2.76537	0.000287995	0.30373	1	2.7885	0.000918284	-0.0421424	1	hypothetical protein	PF00226.26|DnaJ[DnaJ domain]	.	GO:0005840;GO:0000054;GO:0006450;GO:0006364;GO:0005730;GO:0006452;GO:0005829;GO:0005739;GO:0005844	.	.	C4_02870C_A	ZUO1
B9J08_000261	ERG1	Amb	2.42526	0.000387907	0.231392	1	3.25691	0.000465265	0.373746	1	hypothetical protein	PF01266.19|DAO[FAD dependent oxidoreductase];PF08491.5|SE[Squalene epoxidase];PF01494.14|FAD_binding_3[FAD binding domain]	EC:1.14.13.132[Squalene monooxygenase.]	GO:0036171;GO:0036170;GO:0035690;GO:0009267;GO:0031090;GO:0050660;GO:0055114;GO:0008144;GO:0051668;GO:0016021;EC:1.14.13.132;GO:0005886;GO:0036187;GO:0036180;GO:0006696;GO:0005811;GO:0004506;GO:0005789	.	TMH:2	C1_08590C_A	ERG1
B9J08_001460	.	Amb	3.0021	0.000583338	1.02283	1	3.05538	0.000918284	0.987529	1	hypothetical protein	.	.	GO:0005739	.	.	C5_01700W_A	.
B9J08_001674	NOP5	Amb	2.81367	0.000709183	0.337849	1	3.25927	0.000522948	0.162655	1	nucleolar protein 58	PF01798.13|Nop[Putative snoRNA binding domain];PF08060.8|NOSIC[NOSIC (NUC001) domain];PF08156.8|NOP5NT[NOP5NT (NUC127) domain]	.	GO:0030686;GO:0000472;GO:0030447;GO:0031428;GO:0000447;GO:0000480;GO:0032040;GO:0017069	.	.	C6_00370C_A	NOP5
B9J08_004761	RPS12	Both	4.77459	2.02343e-06	0.718785	1	3.02913	0.00178084	0.0669757	1	hypothetical protein	PF01248.21|Ribosomal_L7Ae[Ribosomal protein L7Ae/L30e/S12e/Gadd45 family]	.	GO:0006412;GO:0003735;GO:0022627	.	.	C3_07150C_A	RPS12
B9J08_003217	HOM3	Both	3.73279	5.33666e-06	-0.229389	1	2.74243	0.00118486	-1.6756	1	hypothetical protein	PF01842.20|ACT[ACT domain];PF00696.23|AA_kinase[Amino acid kinase family]	EC:2.7.2.4[Aspartate kinase.]	GO:0016310;GO:0016597;GO:0009088;EC:2.7.2.4;GO:0004072;GO:0009089;GO:0005829;GO:0009090;GO:0009086	ko00270[Cysteine and methionine metabolism];ko00300[Lysine biosynthesis]	.	C4_05540W_A	HOM3
B9J08_005476	MCM2	Both	3.8022	7.06786e-06	0.625758	1	3.03921	0.0015296	0.987434	1	hypothetical protein	PF01078.16|Mg_chelatase[Magnesium chelatase, subunit ChlI];PF00493.18|MCM[MCM2/3/5 family];PF07728.9|AAA_5[AAA domain (dynein-related subfamily)];PF12619.3|MCM2_N[Mini-chromosome maintenance protein 2];PF14551.1|MCM_N[MCM N-terminal domain]	.	GO:0003688;GO:0000784;GO:0005524;GO:1902450;GO:0032508;GO:0005737;GO:0003697;GO:0031298;GO:0003682;GO:0005656;GO:0042555;GO:0000727;GO:0006270;GO:0000790;GO:0006271;GO:0031261;GO:0006267;GO:0003678	ko04113[Meiosis - yeast];ko04111[Cell cycle - yeast];ko04110[Cell cycle]	.	CR_03830C_A	MCM2
B9J08_005153	RPL82	Both	3.37898	1.4904e-05	0.629727	1	2.56885	0.00154947	-0.22446	1	60S ribosomal protein L8-B	PF01248.21|Ribosomal_L7Ae[Ribosomal protein L7Ae/L30e/S12e/Gadd45 family]	.	GO:0005840;GO:0042254	.	.	C1_11030W_A	RPL82
B9J08_001885	.	Both	3.34906	2.00452e-05	0.548395	1	2.41697	0.00488308	0.0422141	1	hypothetical protein	PF01776.12|Ribosomal_L22e[Ribosomal L22e protein family]	.	GO:0005840;GO:0006412;GO:0003735	.	.	C4_04390W_A	.
B9J08_003250	RPP1A	Both	3.42269	2.51109e-05	0.293842	1	2.56508	0.00165971	0.0479009	1	60S acidic ribosomal protein P1-A	PF00428.14|Ribosomal_60s[60s Acidic ribosomal protein]	.	GO:0032147;GO:0002181;GO:0030295;GO:0022625;GO:0006414;GO:0003735	.	.	C1_03010W_A	RPP1A
B9J08_001951	CSA1	Both	3.81091	3.15309e-05	0.303413	1	3.38928	0.00165971	-0.968715	1	hypothetical protein	PF05730.6|CFEM[CFEM domain]	.	GO:0006879;GO:0030446;GO:0009986;GO:0044011;GO:0046658;GO:0005933	.	.	C7_00090C_A	CSA1
B9J08_004391	RPL43A	Both	3.50852	4.197e-05	0.102651	1	2.85769	0.00125451	0.0225639	1	60S ribosomal protein L43	TIGR00280[L37a: ribosomal protein L37a];PF01780.14|Ribosomal_L37ae[Ribosomal L37ae protein family]	.	GO:0005840;GO:0006412;GO:000373.	.	.	C5_04590C_A	RPL43A
B9J08_002600	PMM1	Both	3.5083	4.197e-05	0.922313	1	2.85668	0.00125451	0.489564	1	phosphomannomutase	PF03332.8|PMM[Eukaryotic phosphomannomutase];PF08282.7|Hydrolase_3[haloacid dehalogenase-like hydrolase]	EC:5.4.2.8[Phosphomannomutase.]	GO:0045047;EC:5.4.2.8;GO:0004615;GO:0005829;GO:0009298	ko00520[Amino sugar and nucleotide sugar metabolism]	.	C1_02480W_A	PMM1
B9J08_002116	DED81	Both	3.035	4.19908e-05	0.067208	1	2.41413	0.00123049	-0.530567	1	asparagine-tRNA ligase%2C cytoplasmic	TIGR00457[asnS: asparagine--tRNA ligase];PF00152.15|tRNA-synt_2[tRNA synthetases class II (D, K and N)];PF01336.20|tRNA_anti-codon[OB-fold nucleic acid binding domain]	EC:6.1.1.22[Asparagine--tRNA ligase.]	GO:0006421;GO:0005524;GO:0005829;EC:6.1.1.22;GO:0004816;GO:0003676	.	.	C7_03670W_A	DED81
B9J08_000185	RPS7A	Both	3.34182	4.19908e-05	0.600785	1	2.53448	0.0020435	0.0864401	1	40S ribosomal protein S7-A	PF01251.13|Ribosomal_S7e[Ribosomal protein S7e]	.	GO:0005840;GO:0009986;GO:0006412;GO:0003735	.	.	C3_01490W_A	RPS7A
B9J08_001278	RPL16A	Both	3.70957	4.50548e-05	0.535522	1	2.66176	0.00352488	-0.223574	1	60S ribosomal protein L16-B	PF00572.13|Ribosomal_L13[Ribosomal protein L13];TIGR01077[L13_A_E: ribosomal protein L13]	.	GO:0015934;GO:0006412;GO:0003735	.	.	C1_00180W_A	RPL16A
B9J08_004990	RPS21	Both	3.75783	4.50548e-05	0.617117	1	2.96853	0.00188106	-0.0945466	1	40S ribosomal protein S2	TIGR01020[rpsE_arch: ribosomal protein S5];PF00333.15|Ribosomal_S5[Ribosomal protein S5, N-terminal domain];PF03719.10|Ribosomal_S5_C[Ribosomal protein S5, C-terminal domain]	.	GO:0070181;GO:0032040;GO:0006407;GO:0006412;GO:0003735;GO:0022627;GO:0045903	.	.	C1_01480C_A	RPS21
B9J08_000878	.	Both	3.28226	4.79328e-05	0.475441	1	2.65134	0.00137235	0.380795	1	60S ribosomal protein L33-A	PF01247.13|Ribosomal_L35Ae[Ribosomal protein L35Ae]	.	GO:0005840;GO:0006412;GO:0003735	.	.	C2_05710C_A	.
B9J08_001922	RPL10A	Both	3.94755	5.44156e-05	0.525295	1	3.17144	0.00167183	0.004453	1	60S ribosomal protein L10a	PF00687.16|Ribosomal_L1[Ribosomal protein L1p/L10e family]	.	GO:0003723;GO:0015934;GO:0006412;GO:0003735	.	.	C6_02240C_A	RPL10A
B9J08_003919	RPL27A	Both	3.40073	5.66241e-05	0.35878	1	2.79066	0.00137831	0.192939	1	60S ribosomal protein L27	PF01777.13|Ribosomal_L27e[Ribosomal L27e protein family]	.	GO:0005840;GO:0005634;GO:0005829;GO:0006412;GO:0003735;GO:0030687	.	.	C1_12390C_A	RPL27A
B9J08_005099	RPL5	Both	3.52468	5.66479e-05	0.922614	1	2.75453	0.0020431	0.00918053	1	60S ribosomal protein L5	PF14204.1|Ribosomal_L18_c[Ribosomal L18 C-terminal region];PF00861.17|Ribosomal_L18p[Ribosomal L18p/L5e family]	.	GO:0006412;GO:0000027;GO:0022625;GO:0016021;GO:0008097;GO:0003735	.	.	C7_01790C_A	RPL5
B9J08_004067	RPS5	Both	3.73284	5.73637e-05	0.849122	1	2.90341	0.00121862	0.28495	1	40S ribosomal protein S5	PF00177.16|Ribosomal_S7[Ribosomal protein S7p/S5e];TIGR01028[S7_S5_E_A: ribosomal protein S7]	.	GO:0016020;GO:0003723;GO:0006407;GO:0006412;GO:0003735;GO:0022627	.	.	C5_03070W_A	RPS5
B9J08_001851	RPL15A	Both	3.59813	6.07578e-05	0.701362	1	2.726	0.00296415	-0.0300479	1	60S ribosomal protein L15-A	PF00827.12|Ribosomal_L15e[Ribosomal L15]	.	GO:0005840;GO:0006412;GO:0003735	.	.	CR_04100C_A	RPL15A
B9J08_001469	GIN1	Both	2.74406	6.13546e-05	0.569189	1	1.78826	0.0111432	0.479581	1	hypothetical protein	PF09444.5|MRC1[MRC1-like domain]	.	GO:0030466;GO:0000781;GO:0006281;GO:0033262;GO:0048478;GO:0006348;GO:0000076;GO:0031573;GO:0031298;GO:0043570;GO:0007064;GO:0000723	.	.	C1_11440C_A	GIN1
B9J08_001421	IDI1	Both	3.53686	6.49622e-05	1.02711	1	3.09763	0.00188106	0.854239	1	isopentenyl-diphosphate delta-isomerase	TIGR02150[IPP_isom_1: isopentenyl-diphosphate delta-isomerase];PF00293.23|NUDIX[NUDIX domain]	EC:5.3.3.2[Isopentenyl-diphosphate Delta-isomerase.]	GO:0005634;GO:0045337;GO:0016787;GO:0004452;EC:5.3.3.2	.	.	C4_02280W_A	IDI1
B9J08_003393	.	Both	3.5784	7.65303e-05	0.780577	1	2.63292	0.00201639	0.144836	1	60S ribosomal protein L34-B	PF01199.13|Ribosomal_L34e[Ribosomal protein L34e]	.	GO:0042254;GO:0003723;GO:0006412;GO:0022625;GO:0003735	.	.	C1_06890C_A	.
B9J08_003677	RPS23A	Both	3.25869	7.69463e-05	0.311815	1	2.40078	0.00373761	0.0155125	1	40S ribosomal protein S23	TIGR00982[S23_S12_E_A: ribosomal protein S23 (S12)];PF00164.20|Ribosom_S12_S23[Ribosomal protein S12/S23]	.	GO:0006412;GO:0003735;GO:0022627	.	.	C1_06580W_A	RPS23A
B9J08_002375	LYS9	Both	2.87263	7.9539e-05	0.0412115	1	2.08501	0.00523947	-0.542105	1	hypothetical protein	PF01488.15|Shikimate_DH[Shikimate / quinate 5-dehydrogenase];PF13460.1|NAD_binding_10[NADH(P)-binding];PF03435.13|Saccharop_dh[Saccharopine dehydrogenase]	EC:1.5.1.10[Saccharopine dehydrogenase (NADP(+), L-glutamate-forming).]	GO:0004755;EC:1.5.1.10;GO:0055114;GO:0005737;GO:0019878	ko00310[Lysine degradation]	.	C3_06590W_A	LYS9
B9J08_001081	RPL23A	Both	3.76209	8.99466e-05	0.330912	1	2.89439	0.00296378	-0.13071	1	60S ribosomal protein L23-B	PF00238.14|Ribosomal_L14[Ribosomal protein L14p/L23e]	.	GO:0005840;GO:0006412;GO:0003735	.	.	C6_02070C_A	RPL23A
B9J08_003273	RPS18	Both	3.43594	9.52576e-05	0.651636	1	2.75869	0.0020435	0.259917	1	40S ribosomal protein S18-B	PF00416.17|Ribosomal_S13[Ribosomal protein S13/S18]	.	GO:0003723;GO:0005762;GO:0006412;GO:0003735	.	.	C7_00960W_A	RPS18
B9J08_004672	.	Both	3.08282	9.52576e-05	0.591897	1	2.27837	0.00715802	-0.0783499	1	40S ribosomal protein S22	PF00410.14|Ribosomal_S8[Ribosomal protein S8]	.	GO:0005840;GO:0006412;GO:0003735	.	.	C1_03620C_A	.
B9J08_005382	RPL32	Both	3.56411	9.52576e-05	0.794608	1	2.81246	0.00165971	0.21484	1	60S ribosomal protein L32	PF01655.13|Ribosomal_L32e[Ribosomal protein L32]	.	GO:0006412;GO:0022625;GO:0003735	.	.	C6_01700W_A	RPL32
B9J08_004147	.	Both	3.20921	0.000104152	0.613003	1	2.63307	0.00202942	0.223307	1	elongation factor G%2C mitochondrial	PF00679.19|EFG_C[Elongation factor G C-terminus];TIGR00484[EF-G: translation elongation factor G];PF14492.1|EFG_II[Elongation Factor G, domain II];PF00009.22|GTP_EFTU[Elongation factor Tu GTP binding domain];PF03144.20|GTP_EFTU_D2[Elongation factor Tu domain 2];PF03764.13|EFG_IV[Elongation factor G, domain IV]	.	GO:0003746;GO:0005525;GO:0005739;GO:0070125;GO:0003924	.	.	C1_13060C_A	.
B9J08_005150	RPL2	Both	3.79316	0.000108507	0.660095	1	2.70404	0.00650354	0.317698	1	60S ribosomal protein L2-A	PF00181.18|Ribosomal_L2[Ribosomal Proteins L2, RNA binding domain];PF03947.13|Ribosomal_L2_C[Ribosomal Proteins L2, C-terminal domain]	.	GO:0005840;GO:0006412;GO:0003735	.	.	C1_11060C_A	RPL2
B9J08_003313	RPL4B	Both	3.72083	0.000109154	0.609467	1	2.58447	0.00922903	-0.0396177	1	60S ribosomal protein L4-A	PF00573.17|Ribosomal_L4[Ribosomal protein L4/L1 family];PF14374.1|Ribos_L4_asso_C[60S ribosomal protein L4 C-terminal domain]	.	GO:0016020;GO:0005840;GO:0009986;GO:0006412;GO:0003735	.	.	C1_14110C_A	RPL4B
B9J08_000711	RPP0	Both	3.5876	0.000110107	0.610203	1	2.5372	0.0077941	0.344943	1	60S acidic ribosomal protein P0	PF00428.14|Ribosomal_60s[60s Acidic ribosomal protein];PF00466.15|Ribosomal_L10[Ribosomal protein L10]	.	GO:0002181;GO:0000027;GO:0022625;GO:0003735;GO:0070180	.	.	C7_00990W_A	RPP0
B9J08_002429	ASN1	Both	3.03381	0.000114195	0.16359	1	2.4435	0.00236184	-0.758126	1	asparagine synthetase [glutamine-hydrolyzing] 2	PF12481.3|DUF3700[Aluminium induced protein];PF13522.1|GATase_6[Glutamine amidotransferase domain];TIGR01536[asn_synth_AEB: asparagine synthase (glutamine-hydrolyzing)];PF13537.1|GATase_7[Glutamine amidotransferase domain];PF00733.16|Asn_synthase[Asparagine synthase]	EC:6.3.5.4[Asparagine synthase (glutamine-hydrolyzing).]	GO:0006529;EC:6.3.5.4;GO:0004066	ko00910[Nitrogen metabolism]	.	C2_09060C_A	ASN1
B9J08_000823	RPL42	Both	3.31131	0.000130431	0.494531	1	2.36278	0.00692137	-0.0516597	1	60S ribosomal protein L44	PF00935.14|Ribosomal_L44[Ribosomal protein L44]	.	GO:0046677;GO:0046898;GO:0006412;GO:0022625;GO:0003735	.	.	C1_10390C_A	RPL42
B9J08_003127	RPL17B	Both	3.16921	0.000135355	0.480986	1	2.73129	0.0017357	0.0859424	1	60S ribosomal protein L17-B	TIGR01038[L22_arch: ribosomal protein L22];PF00237.14|Ribosomal_L22[Ribosomal protein L22p/L17e]	.	GO:0009986;GO:0035690;GO:0015934;GO:0006412;GO:0003735	.	.	C2_04600C_A	RPL17B
B9J08_000091	RPS19A	Both	3.73752	0.000148023	0.677509	1	3.11438	0.00215612	0.257991	1	40S ribosomal protein S19-A	PF01090.14|Ribosomal_S19e[Ribosomal protein S19e]	.	GO:0000028;GO:0006412;GO:0003735;GO:0022627	.	.	C3_05200W_A	RPS19A
B9J08_003023	RPL3	Both	3.81332	0.000157328	0.649134	1	2.65137	0.0107058	0.0102997	1	60S ribosomal protein L3	PF00297.17|Ribosomal_L3[Ribosomal protein L3]	.	GO:0009986;GO:0032040;GO:0006412;GO:0000027;GO:0022625;GO:0003735	.	.	C2_09430W_A	RPL3
B9J08_004999	.	Both	3.40572	0.000158664	0.831656	1	2.49386	0.00718521	0.306762	1	60S acidic ribosomal protein P2-A	PF00428.14|Ribosomal_60s[60s Acidic ribosomal protein]	.	GO:0005840;GO:0006414;GO:0003735	.	.	.	.
B9J08_000996	TIF	Both	2.81939	0.000170824	0.560908	1	2.45796	0.00176734	0.245435	1	ATP-dependent RNA helicase eIF4A	PF00271.26|Helicase_C[Helicase conserved C-terminal domain];PF00270.24|DEAD[DEAD/DEAH box helicase]	.	GO:0006413;GO:0003743;GO:0005524;GO:0005829;GO:0008026	.	.	C1_01350C_A	TIF
B9J08_000064	RPL11	Both	3.36095	0.000175164	0.667428	1	2.78468	0.00255966	0.270641	1	60S ribosomal protein L11-A	PF00281.14|Ribosomal_L5[Ribosomal protein L5];PF00673.16|Ribosomal_L5_C[ribosomal L5P family C-terminus]	.	GO:0005840;GO:0006412;GO:0003735	.	.	C2_06810C_A	RPL11
B9J08_005373	.	Vcz	2.82861	0.027105	-0.0434865	1	4.5068	9.08878e-05	0.551482	1	ATP-dependent RNA helicase DBP9	PF04851.10|ResIII[Type III restriction enzyme, res subunit];PF00271.26|Helicase_C[Helicase conserved C-terminal domain];PF00270.24|DEAD[DEAD/DEAH box helicase]	EC:3.6.4.13[RNA helicase.]	GO:0003723;GO:0033680;GO:0005524;GO:0004004;GO:0005730;GO:0000027;GO:0000463;GO:0032508;GO:0004003	.	.	C6_01890C_A	.
B9J08_004502	.	Vcz	2.36761	0.00218434	0.387281	1	2.91644	0.000186128	0.502447	1	hypothetical protein	PF04615.8|Utp14[Utp14 protein]	.	GO:0000472;GO:0032040;GO:0005730;GO:0000447;GO:0000480	.	.	CR_09800C_A	.
B9J08_005488	.	Vcz	2.08159	0.00319119	0.21955	1	2.67272	0.000222824	0.264213	1	UPF0202 protein KRE33	PF13718.1|GNAT_acetyltr_2[GNAT acetyltransferase 2];PF05127.9|Helicase_RecD[Helicase];PF08351.6|DUF1726[Domain of unknown function (DUF1726)];PF13725.1|tRNA_bind_2[Possible tRNA binding domain]	EC:2.3.1.-[Transferring groups other than amino-acyl groups.]	GO:0030686;GO:0005730;GO:0070317;GO:0042274;GO:0008080	.	.	CR_04240C_A	.
B9J08_004381	UAP1	Vcz	2.02476	0.00319699	0.376714	1	2.92777	0.000229246	0.521321	1	hypothetical protein	PF01704.13|UDPGP[UTP--glucose-1-phosphate uridylyltransferase]	EC:2.7.7.23[UDP-N-acetylglucosamine diphosphorylase.]	GO:0005634;GO:0003977;GO:0006048;EC:2.7.7.23	.	.	C5_02530W_A	UAP1
B9J08_005015	RPF2	Vcz	2.95887	0.00730965	0.300088	1	3.76865	0.000241283	0.75865	1	hypothetical protein	PF04427.13|Brix[Brix domain]	.	GO:0005634;GO:0035690;GO:0005829;GO:0042273	.	.	C2_05230C_A	RPF2
B9J08_003031	PES1	Vcz	2.8924	0.00212665	1.06715	1	3.42965	0.000262061	0.968919	1	hypothetical protein	PF00533.21|BRCT[BRCA1 C Terminus (BRCT) domain];PF06732.6|Pescadillo_N[Pescadillo N-terminus]	.	GO:0044786;GO:0000462;GO:0005654;GO:0036170;GO:0035690;GO:0009267;GO:0000466;GO:0030687;GO:0070545;GO:0000463;GO:1900435;GO:0043021;GO:0009405	.	.	C2_09320C_A	PES1
B9J08_003242	RPO41	Vcz	2.15226	0.00200719	-0.0550291	1	2.80646	0.000308483	0.531948	1	hypothetical protein	PF14700.1|RPOL_N[DNA-directed RNA polymerase N-terminal];PF00940.14|RNA_pol[DNA-dependent RNA polymerase]	EC:2.7.7.6[DNA-directed RNA polymerase.GO:0006390;GO:0003899;GO:0003677;EC:2.7.7.6;GO:0042645;GO:0034245;GO:0000002	.	.	.	C1_00640C_A	RPO41
B9J08_000257	.	Vcz	3.13848	0.0205359	0.191274	1	4.44103	0.000312362	0.369901	1	hypothetical protein	PF08640.6|U3_assoc_6[U3 small nucleolar RNA-associated protein 6]	.	GO:0030515;GO:0034388;GO:0000472;GO:0044732;GO:0000447;GO:0032153;GO:0000480;GO:0032040;GO:0005829	.	.	C1_10880W_A	.
B9J08_000120	TSR1	Vcz	2.58646	0.0146015	0.151845	1	3.4888	0.000318134	0.306687	1	hypothetical protein	PF04950.7|DUF663[Protein of unknown function (DUF663)];PF08142.7|AARP2CN[AARP2CN (NUC121) domain]	.	GO:0005730;GO:0006364;GO:0043021;GO:0005737	.	.	CR_08490W_A	TSR1
B9J08_005338	UTP4	Vcz	2.55463	0.00339552	0.215943	1	3.05621	0.000318134	0.136838	1	hypothetical protein	PF00400.27|WD40[WD domain, G-beta repeat]	.	GO:0072686;GO:0000462;GO:0030686;GO:0032040;GO:0045943;GO:0034455	.	.	C3_02130W_A	UTP4
B9J08_002127	IFH1	Vcz	1.97318	0.00963688	0.506855	1	2.64491	0.000405412	0.623348	1	hypothetical protein	PF10380.4|CRF1[Transcription factor CRF1]	.	GO:0060962;GO:0003712	.	.	C5_02650C_A	IFH1
B9J08_005511	.	Vcz	3.34827	0.00216536	-0.0348353	1	3.85477	0.000522948	0.335821	1	hypothetical protein	PF10441.4|Urb2[Urb2/Npa2 family]	.	GO:0016072;GO:0042254;GO:0005730;GO:0005829	.	.	C3_04370C_A	.
B9J08_003154	LHP1	Vcz	2.2548	0.00339552	-0.0297771	1	2.78268	0.000566482	-0.579567	1	hypothetical protein	PF05383.12|La[La domain]	.	GO:0005654;GO:0005730;GO:0000166;GO:0030529;GO:0000049;GO:0008033	.	.	C1_07500C_A	LHP1
B9J08_003485	TRM1	Vcz	4.28403	0.00950423	0.14998	1	5.23125	0.000580089	0.340649	1	N2%2CN2-dimethylguanosine tRNA methyltransferase	PF02005.11|TRM[N2,N2-dimethylguanosine tRNA methyltransferase];TIGR00308[TRM1: N2,N2-dimethylguanosine tRNA methyltransferase]	EC:2.1.1.216[tRNA (guanine(26)-N(2))-dimethyltransferase.];EC:2.1.1.215[tRNA (guanine(26)-N(2)/guanine(27)-N(2))-dimethyltransferase.]	GO:0004809;GO:0003723;GO:0005634;GO:0002940	.	.	CR_00900W_A	TRM1
B9J08_002746	SIK1	Vcz	2.27846	0.00773922	0.192082	1	2.92268	0.000627775	0.0865992	1	nucleolar protein 56	PF01798.13|Nop[Putative snoRNA binding domain];PF08060.8|NOSIC[NOSIC (NUC001) domain];PF08156.8|NOP5NT[NOP5NT (NUC127) domain]	.	GO:0007165;GO:0004114;GO:0032040;GO:0016021;EC:3.1.4.17	.	.	CR_09950C_A	SIK1
B9J08_002211	SAS10	Vcz	1.91347	0.135311	0.633573	1	3.72335	0.000696006	0.806708	1	hypothetical protein	PF04000.10|Sas10_Utp3[Sas10/Utp3/C1D family];PF09368.5|Sas10[Sas10 C-terminal domain]	.	GO:0000472;GO:0032040;GO:0005730;GO:0000447;GO:0000480	.	.	C4_02790C_A	SAS10
B9J08_003841	BTA1	Vcz	1.12649	0.860179	-1.03618	1	5.2133	0.000833152	-0.0378811	1	hypothetical protein	PF11899.3|DUF3419[Protein of unknown function (DUF3419)]	.	GO:0016020;GO:0008168	.	TMH:1	C1_11490C_A	BTA1
B9J08_004689	NHP2	Vcz	1.53585	0.0324056	0.0913105	1	2.34388	0.000895559	0.479085	1	H/ACA ribonucleoprotein complex subunit 2	PF01248.21|Ribosomal_L7Ae[Ribosomal protein L7Ae/L30e/S12e/Gadd45 family]	.	GO:0031120;GO:0005840;GO:0000469;GO:0031118;GO:0034513;GO:0019013;GO:0031429	.	.	CR_04360C_A	NHP2
B9J08_005046	.	Vcz	2.74946	0.0035074	-0.290506	1	3.13604	0.000899724	0.0263223	1	hypothetical protein	PF11788.3|MRP-L46[39S mitochondrial ribosomal protein L46]	.	GO:0005762;GO:0003735	.	.	C5_00820W_A	.
B9J08_004739	.	Vcz	3.52407	0.00490998	0.460846	1	4.30473	0.000899724	0.229106	1	septum formation protein Maf	TIGR00172[maf: septum formation protein Maf];PF02545.9|Maf[Maf-like protein]	.	GO:0005737	.	.	C7_00680W_A	.
B9J08_002802	.	Vcz	2.29292	0.0116836	0.396984	1	2.86781	0.000971796	0.35909	1	hypothetical protein	PF01281.14|Ribosomal_L9_N[Ribosomal protein L9, N-terminal domain]	.	.	.	.	.	.
Repressed	.	.	.	.	.	.	.	.	.	.	.	.	.	.	.	.	.	.
B9J08_000642	.	Amb	-3.27075	0.000331678	-1.62859	1	-1.37761	0.169751	0.810695	1	hypothetical protein	.	.	.	.	.	.	.
B9J08_000829	TRY5	Amb	-2.82813	0.000235487	-0.950855	1	-2.38866	0.0194734	-2.23215	0.500474	hypothetical protein	PF00096.21|zf-C2H2[Zinc finger, C2H2 type];PF13465.1|zf-H2C2_2[Zinc-finger double domain]	.	GO:0050794	.	.	C6_01500C_A	TRY5
B9J08_000846	.	Amb	-2.39449	0.00052794	-0.986059	1	-1.42404	0.101937	-0.729475	1	hypothetical protein	.	.	.	.	.	.	.
B9J08_001741	PXP2	Amb	-2.56483	0.000989809	-1.02741	1	-2.52596	0.00586065	-1.6039	1	hypothetical protein	PF02770.14|Acyl-CoA_dh_M[Acyl-CoA dehydrogenase, middle domain];PF01756.14|ACOX[Acyl-CoA oxidase];PF14749.1|Acyl-CoA_ox_N[Acyl-coenzyme A oxidase N-terminal]	EC:1.3.3.6[Acyl-CoA oxidase.]	GO:0016627;GO:0016020;GO:0006635	ko04146[Peroxisome];ko01040[Biosynthesis of unsaturated fatty acids];ko03320[PPAR signaling pathway];ko00592[alpha-Linolenic acid metabolism]	.	C3_01930W_A	PXP2
B9J08_002244	.	Amb	-3.22131	0.000387907	-1.41454	1	0.128955	0.966263	2.38366	1	hypothetical protein	.	.	.	.	.	.	.
B9J08_004188	PTR22	Amb	-2.44132	0.000750296	-0.99701	1	-1.94651	0.00936481	1.21992	1	hypothetical protein	PF00854.16|PTR2[POT family]	.	GO:0042937;GO:0042939;GO:0031520;GO:0000324;GO:0035442;GO:0016021;GO:0032153;GO:0071916	.	TMH:11	C3_03800W_A	PTR22
B9J08_004890	.	Amb	-2.95777	9.52576e-05	-0.609443	1	-2.14619	0.00472061	-0.0768969	1	hypothetical protein	PF01425.16|Amidase[Amidase]	EC:3.5.1.4[Amidase.]	GO:0005829;GO:0016884	ko00643[Styrene degradation];ko00380[Tryptophan metabolism];ko00360[Phenylalanine metabolism];ko00627[Aminobenzoate degradation];ko00460[Cyanoamino acid metabolism]	.	C6_02660C_A	.
B9J08_005544	SEC26	Amb	-8.79039	0.000495256	6.85179	1	-1.42926	0.475917	.	.	coatomer subunit beta	PF01602.15|Adaptin_N[Adaptin N terminal region]	.	GO:0006886;GO:0030126;GO:0005829;GO:0005198;GO:0005886;GO:0016192;GO:0000139	.	.	CR_04380C_A	SEC26
B9J08_000940	.	Both	-2.44132	0.000527387	-1.09439	1	-2.777	0.000116159	-0.48739	1	hypothetical protein	.	.	.	.	.	.	.
B9J08_002669	PCK1	Both	-4.76125	1.90813e-06	-2.13298	1	-5.34549	1.04583e-06	-0.834633	1	phosphoenolpyruvate carboxykinase [ATP]	TIGR00224[pckA: phosphoenolpyruvate carboxykinase (ATP)];PF01293.15|PEPCK_ATP[Phosphoenolpyruvate carboxykinase]	EC:4.1.1.49[Phosphoenolpyruvate carboxykinase (ATP).]	GO:0016310;GO:0005524;GO:0006094;GO:0016301;GO:0005829;EC:4.1.1.49;GO:0004612	ko00020[Citrate cycle (TCA cycle)];ko00620[Pyruvate metabolism];ko00710[Carbon fixation in photosynthetic organisms]	.	CR_00200W_A	PCK1
B9J08_002864	NGT1	Both	-3.69428	1.90813e-06	-0.27759	1	-3.71867	1.02779e-06	0.607827	1	hypothetical protein	PF05978.11|UNC-93[Ion channel regulatory protein UNC-93]	.	GO:0015572;GO:0015764;GO:0016021;GO:0005886;GO:0005737	.	TMH:12	C3_00650W_A	NGT1
B9J08_003267	XYL2	Both	-2.47233	0.000501188	-0.633406	1	-3.53913	7.18596e-08	-0.517043	1	hypothetical protein	PF00107.21|ADH_zinc_N[Zinc-binding dehydrogenase];PF08240.7|ADH_N[Alcohol dehydrogenase GroES-like domain]	EC:1.1.1.14[L-iditol 2-dehydrogenase.]	GO:0003939;EC:1.1.1.14;GO:0046526;GO:0008270;GO:0044425;EC:1.1.1.9;GO:0055114	.	.	CR_10840C_A	XYL2
B9J08_003268	SOU2	Both	-3.53566	1.90813e-06	-0.623775	1	-4.59251	3.99237e-11	-0.475229	1	hypothetical protein	PF08659.5|KR[KR domain];PF13561.1|adh_short_C2[Enoyl-(Acyl carrier protein) reductase];PF00106.20|adh_short[short chain dehydrogenase]	.	GO:0055114;GO:0016491	.	.	C4_06380W_A	SOU2
B9J08_004296	.	Both	-5.35417	2.46931e-08	-1.80822	1	-6.22471	3.67793e-12	-2.00094	1	hypothetical protein	.	.	.	.	TMH:1	.	.
B9J08_004930	ARO10	Both	-4.33667	1.90813e-06	-1.10072	1	-3.84011	0.000181793	0.813134	1	hypothetical protein	PF02776.13|TPP_enzyme_N[Thiamine pyrophosphate enzyme, N-terminal TPP binding domain];PF02775.16|TPP_enzyme_C[Thiamine pyrophosphate enzyme, C-terminal TPP binding domain];PF00205.17|TPP_enzyme_M[Thiamine pyrophosphate enzyme, central domain]	EC:4.1.1.-[Carboxy-lyases.]	GO:0050177;GO:0000287;GO:0000950;GO:0006569;GO:0000951;EC:4.1.1.43;GO:0006552;GO:0000949;GO:0030976;GO:0006559	.	.	CR_06860C_A	ARO10
B9J08_004987	.	Both	-2.58405	0.000387907	-1.11407	1	-3.69379	4.56459e-07	-1.38422	1	hypothetical protein	.	.	.	.	.	C1_01510W_A	.
B9J08_000483	HSP70	Vcz	-2.21955	0.0120632	-0.575905	1	-3.49332	8.83468e-05	-0.243941	1	heat shock protein SSA1	PF00012.15|HSP70[Hsp70 protein]	.	GO:1900035;GO:0006457;GO:0005524;GO:0006616;GO:0031072;EC:3.6.1.3;GO:0007163;GO:0005829;GO:0051082;GO:0071014;GO:0006515;GO:0030150;GO:0016887	ko04144[Endocytosis];ko04010[MAPK signaling pathway];ko05162[Measles];ko04141[Protein processing in endoplasmic reticulum];ko04612[Antigen processing and presentation];ko05145[Toxoplasmosis]	.	C1_13480W_A	HSP70
B9J08_000909	.	Vcz	-1.12139	0.111437	-0.115437	1	-2.38392	0.000552399	-0.0937941	1	hypothetical protein	PF13504.1|LRR_7[Leucine rich repeat];PF01302.20|CAP_GLY[CAP-Gly domain]	.	GO:0006457;GO:0005634;GO:0043014;GO:0005829;GO:0007021	.	.	C4_06160W_A	.
B9J08_001015	HGT13	Vcz	-1.83049	0.0148909	-0.595615	1	-3.49497	0.000326119	-1.61501	1	hypothetical protein	PF07690.11|MFS_1[Major Facilitator Superfamily];PF00083.19|Sugar_tr[Sugar (and other) transporter]	.	GO:0055085;GO:0016021;GO:0022857	TMH:12	.	C7_00290C_A	HGT13
B9J08_001076	.	Vcz	-1.5896	0.0136631	0.398075	1	-2.15314	0.000918284	0.0445733	1	hypothetical protein	.	.	GO:0006302;GO:0003677;GO:0006310	.	.	.	.
B9J08_001545	.	Vcz	-1.92291	0.00322146	-0.337025	1	-2.66546	0.000186128	-0.127695	1	hypothetical protein	PF00596.16|Aldolase_II[Class II Aldolase and Adducin N-terminal domain]	.	EC:4.1.2.17;GO:0046872;GO:0008738	.	.	C5_03670C_A	.
B9J08_001713	ALT1	Vcz	-2.49698	0.00302454	-0.283462	1	-3.38689	0.000186128	-0.133055	1	hypothetical protein	PF00155.16|Aminotran_1_2[Aminotransferase class I and II]	.	GO:0009058;GO:0004021;EC:2.6.1.2;GO:0030170	.	.	C3_03480C_A	ALT1
B9J08_001714	.	Vcz	-2.00648	0.00730965	-0.49915	1	-3.13231	8.22522e-05	-0.181299	1	hypothetical protein	.	.	.	.	.	.	.
B9J08_001740	POX1-3	Vcz	-1.51816	0.103699	-0.876178	1	-3.13159	0.000971796	-1.23956	1	hypothetical protein	PF02770.14|Acyl-CoA_dh_M[Acyl-CoA dehydrogenase, middle domain];PF01756.14|ACOX[Acyl-CoA oxidase];PF14749.1|Acyl-CoA_ox_N[Acyl-coenzyme A oxidase N-terminal]	EC:1.3.3.6[Acyl-CoA oxidase.]	EC:1.3.3.6;GO:0006635;GO:0003997;EC:1.3.99.3;GO:0050660;GO:0003995;GO:0005777	ko04146[Peroxisome];ko01040[Biosynthesis of unsaturated fatty acids];ko03320[PPAR signaling pathway];ko00592[alpha-Linolenic acid metabolism]	.	C3_01960C_A	POX1-3
B9J08_002173	ENA2	Vcz	-1.77701	0.0280245	-0.40131	1	-2.87374	0.000627775	-0.00336419	1	potassium/sodium efflux P-type ATPase%2C fungal-type	PF13246.1|Hydrolase_like2[Putative hydrolase of sodium-potassium ATPase alpha subunit];PF00689.16|Cation_ATPase_C[Cation transporting ATPase, C-terminus];PF00690.21|Cation_ATPase_N[Cation transporter/ATPase, N-terminus];PF00702.21|Hydrolase[haloacid dehalogenase-like hydrolase];PF12710.2|HAD[haloacid dehalogenase-like hydrolase];PF00122.15|E1-E2_ATPase[E1-E2 ATPase];TIGR01523[ATPase-IID_K-Na: pot…	.	GO:0070588;GO:0046872;GO:0005524;GO:0005388;GO:0016021;EC:3.6.3.8	.	TMH:10	C1_00390W_A	ENA2
B9J08_002245	.	Vcz	-2.29901	0.0112027	-1.12049	1	-3.11875	0.000405412	0.0820117	1	hypothetical protein	PF00107.21|ADH_zinc_N[Zinc-binding dehydrogenase]	.	GO:0008270;GO:0055114;GO:0016491	.	.	C2_05130W_A	.
B9J08_002397	.	Vcz	-1.93479	0.0203027	-0.370441	1	-3.29604	0.000168306	-0.152893	1	hypothetical protein	.	.	.	.	.	C2_09690C_A	.
B9J08_003088	ALD5	Vcz	-2.21444	0.0120632	-0.920829	1	-3.10155	0.000522948	-1.27059	1	hypothetical protein	PF00171.17|Aldedh[Aldehyde dehydrogenase family]	EC:1.2.1.3[Aldehyde dehydrogenase (NAD(+)).]	EC:1.2.1.5;GO:0019413;GO:0006740;GO:0006090;GO:0042645;GO:0004030;GO:0006067;EC:1.2.1.3;GO:0005829;GO:0009651;GO:0004029	ko00330[Arginine and proline metabolism];ko00640[Propanoate metabolism];ko00040[Pentose and glucuronate interconversions];ko00380[Tryptophan metabolism];ko00903[Limonene and pinene degradation];ko00310[Lysine degradation];ko00280[Valine, leucine and isoleucine degradation];ko00410[beta-Alanine metabolism];ko00620[Pyruvate metabolism];ko00625[Chloroalkane and chloroalkene degradation];ko00071[Fatt…	.	C2_02970C_A	ALD5
B9J08_003474	.	Vcz	-1.67535	0.0333146	0.354846	1	-2.59981	0.000671939	0.467459	1	hypothetical protein	.	EC:3.1.26.5[Ribonuclease P.]	GO:0000172;GO:0005655;GO:0006379;GO:0008033	ko03013[RNA transport]	.	.	.
B9J08_003627	.	Vcz	-2.565	0.0316149	-1.26058	1	-3.91748	0.000187716	1.73228	1	hypothetical protein	PF00011.16|HSP20[Hsp20/alpha crystallin family]	.	GO:0070414;GO:0009986;GO:0070370;GO:0034599;GO:0044182;GO:0009405	.	.	.	.
B9J08_003685	PCD1	Vcz	-1.49253	0.0339127	-0.22735	1	-2.40661	0.000436913	-0.163561	1	hypothetical protein	PF00293.23|NUDIX[NUDIX domain]	.	GO:0016787	.	.	CR_09710W_A	PCD1
B9J08_003693	.	Vcz	-1.98167	0.00324264	-0.51202	1	-2.49491	0.000627775	0.0301841	1	hypothetical protein	.	.	GO:0005739;GO:0019005	.	.	C1_05330C_A	.
B9J08_003702	CDG1	Vcz	-3.38339	0.00191666	-2.20824	1	-3.26852	0.000241283	-0.83259	1	hypothetical protein	PF05995.7|CDO_I[Cysteine dioxygenase type I]	EC:1.13.11.20[Cysteine dioxygenase.]	GO:0016702;GO:0005506;GO:0019451;GO:0055114;EC:1.13.11	ko00430[Taurine and hypotaurine metabolism]	.	CR_09180W_A	CDG1
B9J08_003706	FGR14	Vcz	-0.859233	0.461315	0.272719	1	-3.2322	0.000312362	0.514138	1	hypothetical protein	PF00078.22|RVT_1[Reverse transcriptase (RNA-dependent DNA polymerase)]	.	.	.	.	CR_05240C_A	FGR14
B9J08_004052	.	Vcz	-1.59293	0.0401567	-0.0727787	1	-2.7034	0.000918284	-0.289308	1	hypothetical protein	PF01794.14|Ferric_reduct[Ferric reductase like transmembrane component]	.	GO:0016021	.	TMH:8	C1_09780C_A	.
B9J08_004559	.	Vcz	-1.52213	0.0385745	-0.730153	1	-2.44778	0.000720468	-1.22452	1	hypothetical protein	PF07955.6|DUF1687[Protein of unknown function (DUF1687)]	.	GO:0005739;GO:0055114;GO:0016491	.	.	C7_03030W_A	.
B9J08_004615	.	Vcz	-1.70886	0.0119758	-0.334658	1	-2.29059	0.000718014	-0.0543893	1	hypothetical protein	.	.	GO:0016021	.	TMH:3	.	.
B9J08_004656	.	Vcz	-1.93824	0.0187534	-1.0349	1	-2.77739	0.000798461	-0.8791	1	hypothetical protein	PF08028.6|Acyl-CoA_dh_2[Acyl-CoA dehydrogenase, C-terminal domain];PF02770.14|Acyl-CoA_dh_M[Acyl-CoA dehydrogenase, middle domain];PF02771.11|Acyl-CoA_dh_N[Acyl-CoA dehydrogenase, N-terminal domain];PF00441.19|Acyl-CoA_dh_1[Acyl-CoA dehydrogenase, C-terminal domain]	EC:1.3.99.3[Acyl-CoA dehydrogenase.];EC:1.3.99.2[Transferred entry: 1.3.8.1.]	GO:0004085;EC:1.3.99.3;EC:1.3.8.1;GO:0050660;GO:0003995;GO:0055114	ko00640[Propanoate metabolism];ko00280[Valine, leucine and isoleucine degradation];ko00410[beta-Alanine metabolism];ko03320[PPAR signaling pathway]	.	CR_08920W_A	.
B9J08_004887	.	Vcz	-1.24933	0.399192	1.01248	1	-5.04048	0.000698015	-6.13775	0.00330667	hypothetical protein	.	.	GO:0016021	.	TMH:7	.	.
B9J08_005063	.	Vcz	-2.41455	0.00157227	-1.28133	1	-4.1726	2.05505e-09	-0.213569	1	hypothetical protein	.	.	GO:0016021	.	TMH:1	.	.
B9J08_005163	FBP1	Vcz	-2.3892	0.00618089	-0.742023	1	-3.16817	0.000978233	-0.551758	1	hypothetical protein	PF00316.15|FBPase[Fructose-1-6-bisphosphatase]	EC:3.1.3.11[Fructose-bisphosphatase.]	EC:3.1.3.11;GO:0005634;GO:0019563;GO:0005829;GO:0016311;GO:0042149;GO:0042132	ko00030[Pentose phosphate pathway];ko04910[Insulin signaling pathway];ko00051[Fructose and mannose metabolism];ko00680[Methane metabolism];ko00710[Carbon fixation in photosynthetic organisms]	.	C3_07830W_A	FBP1
B9J08_005198	.	Vcz	-1.48032	0.0258989	-0.561802	1	-2.94167	6.77393e-05	-1.03332	1	hypothetical protein	PF00615.14|RGS[Regulator of G protein signaling domain]	.	.	.	.	.	.
B9J08_005317	.	Vcz	-1.8263	0.00423192	-0.625713	1	-2.28361	0.000552399	-0.605429	1	hypothetical protein	PF00172.13|Zn_clus[Fungal Zn(2)-Cys(6) binuclear cluster domain]	.	GO:0006357;GO:0000981;GO:0005634;GO:0008270	.	.	.	.
