# Supplementary material for: Genomic insights into multidrug-resistance, mating and virulence in Candida auris and related emerging species
Source: Nat Commun. 2018 Dec 17;9:5346. doi: 10.1038/s41467-018-07779-6 (PMC6297351; doi:10.1038/s41467-018-07779-6)
Supplement: Supplementary file 9 — Supplementary Data 7 [file 41467_2018_7779_MOESM9_ESM.xlsx]

## Sheet: Data7. B11210
Supplementary data 7. Genes upregulated in untreated B11210 relative to B8441											.
Condition	Gene ID	Name	Protein family domians	KEGG Enzymes	Gene Ontologies	KEGG Pathway	# Transmemb. domains	C. albicans homolog			.
4hr	B9J08_001998	OPT family small oligopeptide transporter	PF03169.10|OPT[OPT oligopeptide transporter protein];TIGR00727[ISP4_OPT: small oligopeptide transporter, OPT family]	.	GO:0055085;GO:0016021	.	TMH:14	CR_02020C_A	OPT1		.
4hr	B9J08_000005	hypothetical protein	.	.	.	.	.	.			.
4hr	B9J08_004446	hypothetical protein	PF00005.22|ABC_tran[ABC transporter];PF13304.1|AAA_21[AAA domain];PF12848.2|ABC_tran_2[ABC transporter]	.	.	.	.	C1_00480C_A	GCN20		.
2hr	B9J08_000675	hypothetical protein	PF07691.7|PA14[PA14 domain]	.	.	.	.	.	.		.
2hr	B9J08_004296	hypothetical protein	.	.	.	.	TMH:1	.	.		.
2hr	B9J08_001520	hypothetical protein	.	.	.	.	.	.	.		.
2hr	B9J08_002864	hypothetical protein	PF05978.11|UNC-93[Ion channel regulatory protein UNC-93]	.	GO:0015572;GO:0015764;GO:0016021;GO:0005886;GO:0005737	.	TMH:12	C3_00650W_A	NGT1		.
2hr	B9J08_003268	hypothetical protein	PF08659.5|KR[KR domain];PF13561.1|adh_short_C2[Enoyl-(Acyl carrier protein) reductase];PF00106.20|adh_short[short chain dehydrogenaseGO:0055114;GO:0016491	.	.	.	.	C4_06380W_A	SOU2		.
2hr	B9J08_002244	hypothetical protein	.	.	.	.	.	.	.		.
2hr	B9J08_002669	phosphoenolpyruvate carboxykinase [ATP]	TIGR00224[pckA: phosphoenolpyruvate carboxykinase (ATP)];PF01293.15|PEPCK_ATP[Phosphoenolpyruvate carboxykinase]	EC:4.1.1.49[Phosphoenolpyruvate carboxykinase (ATP).]	GO:0016310;GO:0005524;GO:0006094;GO:0016301;GO:0005829;EC:4.1.1.49;GO:0004612	ko00020[Citrate cycle (TCA cycle)];ko00620[Pyruvate metabolism];ko00710[Carbon fixation in photosynthetic organisms]	.	CR_00200W_A	PCK1		.
2hr	B9J08_002499	hypothetical protein	PF00070.22|Pyr_redox[Pyridine nucleotide-disulphide oxidoreductase];PF13434.1|K_oxygenase[L-lysine 6-monooxygenase (NADPH-requiring)];PF07992.9|Pyr_redox_2[Pyridine nucleotide-disulphide oxidoreductase]	.	GO:0055114;GO:0016491	.	TMH:1	C4_03350C_A	AIF1		.
2hr	B9J08_004930	hypothetical protein	PF02776.13|TPP_enzyme_N[Thiamine pyrophosphate enzyme, N-terminal TPP binding domain];PF02775.16|TPP_enzyme_C[Thiamine pyrophosphate enzyme, C-terminal TPP binding domain];PF00205.17|TPP_enzyme_M[Thiamine pyrophosphate enzyme, central domain]	EC:4.1.1.-[Carboxy-lyases.]	GO:0050177;GO:0000287;GO:0000950;GO:0006569;GO:0000951;EC:4.1.1.43;GO:0006552;GO:0000949;GO:0030976;GO:0006559	.	.	CR_06860C_A	ARO10		.
2hr	B9J08_004890	hypothetical protein	PF01425.16|Amidase[Amidase]	EC:3.5.1.4[Amidase.]	GO:0005829;GO:0016884	ko00643[Styrene degradation];ko00380[Tryptophan metabolism];ko00360[Phenylalanine metabolism];ko00627[Aminobenzoate degradation];ko00460[Cyanoamino acid metabolism]	.	C6_02660C_A	.		.
2hr	B9J08_004033	hypothetical protein	.	.	.	.	.	.	.		.
2hr	B9J08_000642	hypothetical protein	.	.	.	.	.	.	.		.
2hr	B9J08_002678	hypothetical protein	PF13460.1|NAD_binding_10[NADH(P)-binding];PF01073.14|3Beta_HSD[3-beta hydroxysteroid dehydrogenase/isomerase family];PF01118.19|Semialdhyde_dh[Semialdehyde dehydrogenase, NAD binding domain];PF05368.8|NmrA[NmrA-like family];PF01370.16|Epimerase[NAD dependent epimerase/dehydratase family]	.	.	.	.	CR_00090C_A	.		.
2hr	B9J08_000829	hypothetical protein	PF00096.21|zf-C2H2[Zinc finger, C2H2 type];PF13465.1|zf-H2C2_2[Zinc-finger double domain]	.	GO:0050794	.	.	C6_01500C_A	TRY5		.
2hr	B9J08_001714	hypothetical protein	.	.	.	.	.	.	.		.
2hr	B9J08_005560	hypothetical protein	.	.	.	.	.	.	.		.
2hr	B9J08_004015	hypothetical protein	PF01055.21|Glyco_hydro_31[Glycosyl hydrolases family 31]	EC:3.2.1.20[Alpha-glucosidase.];EC:3.2.1.3[Glucan 1,4-alpha-glucosidase.]	GO:0030246;EC:3.2.1.20;GO:0005975;GO:0090599;GO:0009987	ko00500[Starch and sucrose metabolism]	.	C1_10290W_A	GCA1		.
2hr	B9J08_000169	hypothetical protein	PF02195.13|ParBc[ParB-like nuclease domain]	EC:1.8.98.2[Sulfiredoxin.]	GO:0005634;GO:0005524;GO:0055114;GO:0032542;EC:1.8.98.2;GO:0005829;GO:0034599;GO:0098869;GO:0034613	.	.	C2_05060C_A	.		.
2hr	B9J08_003267	hypothetical protein	PF00107.21|ADH_zinc_N[Zinc-binding dehydrogenase];PF08240.7|ADH_N[Alcohol dehydrogenase GroES-like domain]	EC:1.1.1.14[L-iditol 2-dehydrogenase.]	GO:0003939;EC:1.1.1.14;GO:0046526;GO:0008270;GO:0044425;EC:1.1.1.9;GO:0055114	.	.	CR_10840C_A	XYL2		.
2hr	B9J08_000940	hypothetical protein	.	.	.	.	.	.	.
2hr	B9J08_004987	hypothetical protein	.	.	.	.	.	C1_01510W_A	.
2hr	B9J08_000850	hypothetical protein	PF00070.22|Pyr_redox[Pyridine nucleotide-disulphide oxidoreductase];PF07992.9|Pyr_redox_2[Pyridine nucleotide-disulphide oxidoreductase]	.	GO:0055114;GO:0016491	.	.	C2_08100W_A	.
2hr	B9J08_003693	hypothetical protein	.	.	GO:0005739;GO:0019005	.	.	C1_05330C_A	.
2hr	B9J08_003232	gamma-glutamyltransferase	TIGR00066[g_glut_trans: gamma-glutamyltransferase];PF01019.16|G_glu_transpept[Gamma-glutamyltranspeptidase]	EC:2.3.2.2[Gamma-glutamyltransferase.]	GO:0000324;GO:0006751;GO:0006805	ko00480[Glutathione metabolism];ko00590[Arachidonic acid metabolism];ko00460[Cyanoamino acid metabolism]	.	C1_00550W_A	CIS2
2hr	B9J08_002032	hypothetical protein	PF00483.18|NTP_transferase[Nucleotidyl transferase];PF00132.19|Hexapep[Bacterial transferase hexapeptide (six repeats)]	EC:2.7.7.13[Mannose-1-phosphate guanylyltransferase.]	GO:0009058;GO:0016779	ko00520[Amino sugar and nucleotide sugar metabolism]	.	C1_13160W_A	PSA2
2hr	B9J08_000656	hypothetical protein	PF01073.14|3Beta_HSD[3-beta hydroxysteroid dehydrogenase/isomerase family];PF01370.16|Epimerase[NAD dependent epimerase/dehydratase family]	.	GO:0016616;GO:0050662	.	.	C5_02860C_A	GRP2
2hr	B9J08_002356	hypothetical protein	.	.	.	.	.	.	.
2hr	B9J08_005544	coatomer subunit beta	PF01602.15|Adaptin_N[Adaptin N terminal region]	.	GO:0006886;GO:0030126;GO:0005829;GO:0005198;GO:0005886;GO:0016192;GO:0000139	.		CR_04380C_A	SEC26
2hr	B9J08_003045	hypothetical protein	.	.	GO:0016021	.	TMH:3	.	.
2hr	B9J08_004188	hypothetical protein	PF00854.16|PTR2[POT family]	.	GO:0042937;GO:0042939;GO:0031520;GO:0000324;GO:0035442;GO:0016021;GO:0032153;GO:0071916	.	TMH:11	C3_03800W_A	PTR22
2hr	B9J08_002626	hypothetical protein	.	.	.	.	TMH:1	.	.
2hr	B9J08_003129	hypothetical protein	.	.	.	.	.	.	.
2hr	B9J08_000483	heat shock protein SSA1	PF00012.15|HSP70[Hsp70 protein]	.	GO:1900035;GO:0006457;GO:0005524;GO:0006616;GO:0031072;EC:3.6.1.3;GO:0007163;GO:0005829;GO:0051082;GO:0071014;GO:0006515;GO:0030150;GO:0016887	ko04144[Endocytosis];ko04010[MAPK signaling pathway];ko05162[Measles];ko04141[Protein processing in endoplasmic reticulum];ko04612[Antigen processing and presentation];ko05145[Toxoplasmosis]	.	C1_13480W_A	HSP70
2hr	B9J08_003046	hypothetical protein	PF00291.20|PALP[Pyridoxal-phosphate dependent enzyme]	.	GO:0006520;GO:0016841;GO:0030170	.	.	C2_01270W_A	CHA1
2hr	B9J08_001682	hypothetical protein	PF03982.8|DAGAT[Diacylglycerol acyltransferase]	.	GO:0016746	.	TMH:1	C3_03760W_A	.
2hr	B9J08_001713	hypothetical protein	PF00155.16|Aminotran_1_2[Aminotransferase class I and II]	.	GO:0009058;GO:0004021;EC:2.6.1.2;GO:0030170	.		C3_03480C_A	ALT1
2hr	B9J08_000170	hypothetical protein	PF03239.9|FTR1[Iron permease FTR1 family]	.	GO:0033573;GO:0000329;GO:0006897;GO:0005381	.	TMH:6.	C1_09400C_A	FTH1
2hr	B9J08_003153	YggS family pyridoxal phosphate enzyme	TIGR00044[TIGR00044: pyridoxal phosphate enzyme, YggS family];PF01168.15|Ala_racemase_N[Alanine racemase, N-terminal domain]	.	GO:0030170	.	.	C1_07510W_A	.
2hr	B9J08_001545	hypothetical protein	PF00596.16|Aldolase_II[Class II Aldolase and Adducin N-terminal domain]	.	EC:4.1.2.17;GO:0046872;GO:0008738	.		C5_03670C_A	.
2hr	B9J08_001531	hypothetical protein	PF11765.3|Hyphal_reg_CWP[Hyphally regulated cell wall protein N-terminal]	.	.	.	.	CR_00610W_A	IFF4
2hr	B9J08_005063	hypothetical protein	.	.	GO:0016021	.	TMH:1	.	.
2hr	B9J08_000846	hypothetical protein	.	.	.	.	.	.	.
2hr	B9J08_004468	hypothetical protein	PF08030.7|NAD_binding_6[Ferric reductase NAD binding domain];PF08022.7|FAD_binding_8[FAD-binding domain];PF01794.14|Ferric_reduct[Ferric reductase like transmembrane component]	.	GO:0016021;GO:0055114;GO:0016491	.	TMH:5	C4_00110C_A	FRP1
2hr	B9J08_004136	hypothetical protein	.	.	.	.	.	.	.
2hr	B9J08_001200	hypothetical protein	PF04667.12|Endosulfine[cAMP-regulated phosphoprotein/endosulfine conserved region]	.	.	.	.	C3_02920W_A	.
2hr	B9J08_001721	hypothetical protein	PF13380.1|CoA_binding_2[CoA binding domain]	.	GO:0048037	.	.	C1_12140W_A	.
2hr	B9J08_004522	hypothetical protein	PF00069.20|Pkinase[Protein kinase domain];PF07714.12|Pkinase_Tyr[Protein tyrosine kinase]	.	GO:0005524;GO:0004674;EC:2.7.11;GO:0006468;GO:0016021	.	TMH:3	C1_05370C_A	.
2hr	B9J08_002704	hypothetical protein	PF08231.7|SYF2[SYF2 splicing factor]	.	.	.	.	.	.
2hr	B9J08_002445	hypothetical protein	PF00069.20|Pkinase[Protein kinase domain];PF07714.12|Pkinase_Tyr[Protein tyrosine kinase]	.	GO:0005524;GO:0004674;EC:2.7.11;GO:0006468	.	.	C3_05420W_A	.
2hr	B9J08_002012	hypothetical protein	.	.	.	.	.	.	.
2hr	B9J08_001116	hypothetical protein	PF01764.20|Lipase_3[Lipase (class 3)];PF00756.15|Esterase[Putative esterase];PF12697.2|Abhydrolase_6[Alpha/beta hydrolase family]	GO:0016787;GO:0006629	.	.	.	C6_00980C_A	.
2hr	B9J08_000491	hypothetical protein	PF01645.12|Glu_synthase[Conserved region in glutamate synthase];PF01070.13|FMN_dh[FMN-dependent dehydrogenase];PF00173.23|Cyt-b5[Cytochrome b5-like Heme/Steroid binding domain]	EC:1.1.2.3[L-lactate dehydrogenase (cytochrome).]	GO:0046872;GO:0020037;GO:0010181;GO:0055114;GO:0016491	.	.	C1_13630W_A	CYB2
2hr	B9J08_002366	hypothetical protein	PF00141.18|peroxidase[Peroxidase]	EC:1.11.1.5[Cytochrome-c peroxidase.]	GO:0020037;GO:0005758;GO:0055114;GO:0046872;EC:1.11.1.5;GO:0034599;GO:0098869;GO:0016021;GO:0004130	.	TMH:1	C3_02480C_A	CCP1
2hr	B9J08_003279	hypothetical protein	PF04468.7|PSP1[PSP1 C-terminal conserved region]	.	.	.	.	C7_00880C_A	.
2hr	B9J08_002480	hypothetical protein	PF07690.11|MFS_1[Major Facilitator Superfamily];PF00083.19|Sugar_tr[Sugar (and other) transporter]	.	GO:0055085;GO:0016021;GO:0022857	.	TMH:12	C2_01000W_A	HGT7
2hr	B9J08_004469	hypothetical protein	PF05730.6|CFEM[CFEM domain]	.	GO:0016020;GO:0020037;GO:0009986;GO:0044011;GO:0033212;GO:0009405	.	TMH:1	C4_00120W_A	PGA7
2hr	B9J08_002119	hypothetical protein	.	.	.	.	.	.	.
2hr	B9J08_003830	hypothetical protein	PF00854.16|PTR2[POT family]	.	GO:0042937;GO:0042939;GO:0031520;GO:0000324;GO:0035442;GO:0016021;GO:0032153;GO:0071916	.	TMH:11	C3_03800W_A	PTR22
2hr	B9J08_001741	hypothetical protein	PF02770.14|Acyl-CoA_dh_M[Acyl-CoA dehydrogenase, middle domain];PF01756.14|ACOX[Acyl-CoA oxidase];PF14749.1|Acyl-CoA_ox_N[Acyl-coenzyme A oxidase N-terminal]	EC:1.3.3.6[Acyl-CoA oxidase.]	GO:0016627;GO:0016020;GO:0006635	ko04146[Peroxisome];ko01040[Biosynthesis of unsaturated fatty acids];ko03320[PPAR signaling pathway];ko00592[alpha-Linolenic acid metabolism]	.	C3_01930W_A	PXP2
2hr	B9J08_002397	hypothetical protein	.	.	.	.	.	C2_09690C_A	.
2hr	B9J08_003385	hypothetical protein	PF04568.7|IATP[Mitochondrial ATPase inhibitor, IATP]	.	GO:0032780;GO:0042030;GO:0005739	.	.	.	.
2hr	B9J08_001015	hypothetical protein	PF07690.11|MFS_1[Major Facilitator Superfamily];PF00083.19|Sugar_tr[Sugar (and other) transporter]	.	GO:0055085;GO:0016021;GO:0022857	.	TMH:12	C7_00290C_A	HGT13
2hr	B9J08_004052	hypothetical protein	PF01794.14|Ferric_reduct[Ferric reductase like transmembrane component]	.	GO:0016021	.	TMH:8	C1_09780C_A	.
2hr	B9J08_002628	hypothetical protein	PF00172.13|Zn_clus[Fungal Zn(2)-Cys(6) binuclear cluster domain]	.	GO:0016020;GO:0035948;GO:0000978;GO:0005634;GO:2000218;GO:0008270;GO:0001077;GO:0061414;GO:0006366	.	.	C3_04020C_A	ZCF16
2hr	B9J08_003404	hypothetical protein	PF03370.8|CBM_21[Putative phosphatase regulatory subunit]	EC:3.1.3.16[Phosphoprotein phosphatase.]	.	.		C1_01140C_A	.
2hr	B9J08_005163	hypothetical protein	PF00316.15|FBPase[Fructose-1-6-bisphosphatase]	EC:3.1.3.11[Fructose-bisphosphatase.]	EC:3.1.3.11;GO:0005634;GO:0019563;GO:0005829;GO:0016311;GO:0042149;GO:0042132	ko00030[Pentose phosphate pathway];ko04910[Insulin signaling pathway];ko00051[Fructose and mannose metabolism];ko00680[Methane metabolism];ko00710[Carbon fixation in photosynthetic organisms]	.	C3_07830W_A	FBP1
2hr	B9J08_002305	hypothetical protein	.	.	.	.	.	.	.
2hr	B9J08_005198	hypothetical protein	PF00615.14|RGS[Regulator of G protein signaling domain]	.	.	.	.	.	.
2hr	B9J08_002790	hypothetical protein	.	.	GO:0046872;GO:0003676	.	.	.	.
2hr	B9J08_002992	hypothetical protein	PF13933.1|HRXXH[Putative peptidase family]	.	GO:0042784;GO:0007159;GO:0052155;GO:0032119;GO:0030446;GO:0045916;GO:0044406;GO:0001411;GO:0009986;GO:0006508;GO:0005178;GO:0008237;GO:0005576;GO:0008270;GO:0030985;GO:0070051	.	.	C4_06980W_A	PRA1

## Sheet: Data7. B8441
Supplementary data 7. Genes upregulated in untreated B8441 relative to B11210							.
Condition	Gene ID	Name	Protein family domians	KEGG Enzymes	Gene Ontologies	KEGG Pathway	# Transmemb. domains	C. albicans homolog
2h	B9J08_003288	40S ribosomal protein S28-A	PF01200.13|Ribosomal_S28e[Ribosomal protein S28e]	.	GO:0006407;GO:0006412;GO:0003735;GO:0022627;GO:1900153	.	.	C7_00710W_A	RPS28B
2h	B9J08_005476	hypothetical protein	PF01078.16|Mg_chelatase[Magnesium chelatase, subunit ChlI];PF00493.18|MCM[MCM2/3/5 family];PF07728.9|AAA_5[AAA domain (dynein-related subfamily)];PF12619.3|MCM2_N[Mini-chromosome maintenance protein 2];PF14551.1|MCM_N[MCM N-terminal domain]	.	GO:0003688;GO:0000784;GO:0005524;GO:1902450;GO:0032508;GO:0005737;GO:0003697;GO:0031298;GO:0003682;GO:0005656;GO:0042555;GO:0000727;GO:0006270;GO:0000790;GO:0006271;GO:0031261;GO:0006267;GO:0003678	ko04113[Meiosis - yeast];ko04111[Cell cycle - yeast];ko04110[Cell cycle]	.	CR_03830C_A	MCM2
2h	B9J08_004146	hypothetical protein	PF01929.12|Ribosomal_L14e[Ribosomal protein L14]	.	GO:0005840;GO:0005634;GO:0005829;GO:0006412;GO:0003735	.	.	C1_13050W_A	RPL14
2h	B9J08_002719	60S ribosomal protein L30	PF01248.21|Ribosomal_L7Ae[Ribosomal protein L7Ae/L30e/S12e/Gadd45 family]	.	GO:0005840;GO:0006412;GO:0030627;GO:0048025;GO:0003735;GO:0006364	.	.	C4_04900W_A	RPL30
2h	B9J08_003248	40S ribosomal protein S16	PF00380.14|Ribosomal_S9[Ribosomal protein S9/S16]	.	GO:0005840;GO:0006412;GO:0003735	.	.	C1_03030W_A	RPS16A
2h	B9J08_000998	40S ribosomal protein S21	PF01249.13|Ribosomal_S21e[Ribosomal protein S21e]	.	GO:0005840;GO:0005634;GO:0005829;GO:0006412;GO:0042274;GO:0003735;GO:0006364	.	.	C1_01370C_A	RPS21B
2h	B9J08_002321	hypothetical protein	PF00557.19|Peptidase_M24[Metallopeptidase family M24]	EC:3.-.-.-[Hydrolases.]	GO:0000055;GO:0005654;GO:0008233;GO:0005730;GO:0005635;GO:0022625;GO:0030687;GO:0042273	.	.	C1_03230C_A	ARX1
2h	B9J08_000209	60S acidic ribosomal protein P1-B	PF00428.14|Ribosomal_60s[60s Acidic ribosomal protein]	.	GO:0002181;GO:0022625;GO:0006414;GO:0003735	.	.	C7_03920C_A	RPP1B
2h	B9J08_002742	dihydroorotate dehydrogenase (quinone)%2C mitochondrial	PF01180.16|DHO_dh[Dihydroorotate dehydrogenase];TIGR01036[pyrD_sub2: dihydroorotate dehydrogenase (fumarate)]	EC:1.3.98.1[Dihydroorotate oxidase (fumarate).]	GO:0004158;GO:0044205;GO:0031304;GO:0016021;GO:0006207;GO:0055114;EC:1.3.3.1	.	TMH:1	C1_09720W_A	URA1
2h	B9J08_003089	40S ribosomal protein S24-A	PF01282.14|Ribosomal_S24e[Ribosomal protein S24e]	.	GO:0005840;GO:0000462;GO:0005730;GO:0000166;GO:0005829;GO:0006412;GO:0003735;GO:0005739	.	.	C3_00090W_A	RPS24
2h	B9J08_002753	hypothetical protein	.	.	.	.	.	.	.
2h	B9J08_002600	phosphomannomutase	PF03332.8|PMM[Eukaryotic phosphomannomutase];PF08282.7|Hydrolase_3[haloacid dehalogenase-like hydrolase]	EC:5.4.2.8[Phosphomannomutase.]	GO:0045047;EC:5.4.2.8;GO:0004615;GO:0005829;GO:0009298	ko00520[Amino sugar and nucleotide sugar metabolism]	.	C1_02480W_A	PMM1
2h	B9J08_000087	hypothetical protein	PF00493.18|MCM[MCM2/3/5 family];PF07728.9|AAA_5[AAA domain (dynein-related subfamily)];PF14551.1|MCM_N[MCM N-terminal domain]	.	GO:0006343;GO:0003688;GO:0030174;GO:0000784;GO:0005524;GO:0032508;GO:0003697;GO:0031298;GO:0005656;GO:0005829;GO:0042555;GO:0003682;GO:0031939;GO:0000727;GO:0051097;GO:0006270;GO:0006348;GO:0031261;GO:0006267;GO:0051301;GO:0003678	ko04113[Meiosis - yeast];ko04111[Cell cycle - yeast];ko04110[Cell cycle]	.	C2_06250C_A	CDC46
2h	B9J08_004434	60S ribosomal protein L8-B	PF01248.21|Ribosomal_L7Ae[Ribosomal protein L7Ae/L30e/S12e/Gadd45 family]	.	GO:0005840;GO:0042254	.	.	C1_11030W_A	RPL82
2h	B9J08_002732	hypothetical protein	PF08718.6|GLTP[Glycolipid transfer protein (GLTP)]	.	GO:0017089;GO:0051861;GO:0046836;GO:0009405;GO:0005737	.	.	C6_00100C_A	HET1
2h	B9J08_000605	40S ribosomal protein S14	PF00411.14|Ribosomal_S11[Ribosomal protein S11]	.	GO:0000462;GO:0030686;GO:0048027;GO:0002181;GO:0000028;GO:0005730;GO:0032040;GO:0070181;GO:0022627;GO:0003735	.	.	C1_06450C_A	RPS14B
2h	B9J08_000604	40S ribosomal protein S22	PF00410.14|Ribosomal_S8[Ribosomal protein S8]	.	GO:0005840;GO:0006412;GO:0003735	.	.	C1_03620C_A	.
2h	B9J08_003634	60S ribosomal protein L31-A	PF01198.14|Ribosomal_L31e[Ribosomal protein L31e]	.	GO:0005840;GO:0006412;GO:0003735	.	.	C2_05410W_A	.
2h	B9J08_005324	40S ribosomal protein S0	PF00318.15|Ribosomal_S2[Ribosomal protein S2];TIGR01012[Sa_S2_E_A: ribosomal protein S2]	.	GO:0016020;GO:0000028;GO:0006412;GO:0003735;GO:0022627	.	.	C3_05370C_A	YST1
2h	B9J08_001885	hypothetical protein	PF01776.12|Ribosomal_L22e[Ribosomal L22e protein family]	.	GO:0005840;GO:0006412;GO:0003735	.	.	C4_04390W_A	.
2h	B9J08_000771	40S ribosomal protein S6	PF01092.14|Ribosomal_S6e[Ribosomal protein S6e]	.	GO:0005840;GO:0009986;GO:0030445;GO:0006412;GO:0003735	ko04150[mTOR signaling pathway];ko04910[Insulin signaling pathway]	.	C4_01270W_A	RPS6A
2h	B9J08_000727	60S ribosomal protein L36	PF01158.13|Ribosomal_L36e[Ribosomal protein L36e]	.	GO:0005840;GO:0006412;GO:0003735	.	.	C2_03960W_A	RPL39
2h	B9J08_004761	hypothetical protein	PF01248.21|Ribosomal_L7Ae[Ribosomal protein L7Ae/L30e/S12e/Gadd45 family]	.	GO:0006412;GO:0003735;GO:0022627	.	.	C3_07150C_A	RPS12
2h	B9J08_003250	60S acidic ribosomal protein P1-A	PF00428.14|Ribosomal_60s[60s Acidic ribosomal protein]	.	GO:0032147;GO:0002181;GO:0030295;GO:0022625;GO:0006414;GO:0003735	.	.	C1_03010W_A	RPP1A
2h	B9J08_004993	aspartate-tRNA ligase%2C cytoplasmic	TIGR00458[aspS_nondisc: aspartate--tRNA(Asn) ligase];PF00152.15|tRNA-synt_2[tRNA synthetases class II (D, K and N)];PF01336.20|tRNA_anti-codon[OB-fold nucleic acid binding domain]	EC:6.1.1.12[Aspartate--tRNA ligase.]	GO:0006422;GO:0003723;GO:0005634;GO:0005524;EC:6.1.1.12;GO:0005829;GO:0004815	.	.	CR_03170W_A	DPS1-1
2h	B9J08_002484	eukaryotic peptide chain release factor subunit 1	PF03464.10|eRF1_2[eRF1 domain 2];PF03463.10|eRF1_1[eRF1 domain 1];PF03465.10|eRF1_3[eRF1 domain 3];TIGR03676[aRF1/eRF1: peptide chain release factor 1, archaeal and eukaryotic forms]	.	GO:0005634;GO:0018444;GO:0005829;GO:0016149;GO:0002184	.	.	C2_05100C_A	ERF1
2h	B9J08_000090	60S ribosomal protein L18-A	PF00828.14|Ribosomal_L18e[Ribosomal protein L18e/L15]	.	GO:0005840;GO:0006412;GO:0003735	.	.	C3_05100C_A	RPL18
2h	B9J08_000965	hypothetical protein	PF08662.6|eIF2A[Eukaryotic translation initiation factor eIF2A]	.	GO:0006413;GO:0003743;GO:0022627	.	.	C1_02430C_B	.
2h	B9J08_003620	hypothetical protein	PF04003.7|Utp12[Dip2/Utp12 Family];PF00400.27|WD40[WD domain, G-beta repeat]	.	GO:0036180;GO:0005634;GO:0036170;GO:0035690;GO:0009267;GO:0032040;GO:0005829	.	.	C1_08290C_A	DIP2
2h	B9J08_003756	60S acidic ribosomal protein P2-B	PF00428.14|Ribosomal_60s[60s Acidic ribosomal protein]	.	GO:0032147;GO:0002181;GO:0030295;GO:0022625;GO:0006414;GO:0003735	.	.	C3_04680W_A	RPP2B
2h	B9J08_001421	isopentenyl-diphosphate delta-isomerase	TIGR02150[IPP_isom_1: isopentenyl-diphosphate delta-isomerase];PF00293.23|NUDIX[NUDIX domain]	EC:5.3.3.2[Isopentenyl-diphosphate Delta-isomerase.]	GO:0005634;GO:0045337;GO:0016787;GO:0004452;EC:5.3.3.2	.	.	C4_02280W_A	IDI1
2h	B9J08_001469	hypothetical protein	PF09444.5|MRC1[MRC1-like domain]	.	GO:0030466;GO:0000781;GO:0006281;GO:0033262;GO:0048478;GO:0006348;GO:0000076;GO:0031573;GO:0031298;GO:0043570;GO:0007064;GO:0000723	.	.	C1_11440C_A	GIN1
2h	B9J08_005205	hypothetical protein	PF05345.7|He_PIG[Putative Ig domain]	.	GO:0005887;GO:0005509;GO:0005940;GO:0005935;GO:0007120	.	TMH:1	C4_04170C_A	AXL2
2h	B9J08_005153	60S ribosomal protein L8-B	PF01248.21|Ribosomal_L7Ae[Ribosomal protein L7Ae/L30e/S12e/Gadd45 family]	.	GO:0005840;GO:0042254	.	.	C1_11030W_A	RPL82
2h	B9J08_000425	hypothetical protein	PF01535.15|PPR[PPR repeat];PF13812.1|PPR_3[Pentatricopeptide repeat domain]	.	.	.	.	C5_01140C_A	.
2h	B9J08_001128	hypothetical protein	PF00673.16|Ribosomal_L5_C[ribosomal L5P family C-terminus]	.	GO:0005762;GO:0003735	.	.	C2_07680W_A	.
2h	B9J08_002918	hypothetical protein	PF12847.2|Methyltransf_18[Methyltransferase domain];PF08241.7|Methyltransf_11[Methyltransferase domain];PF02353.15|CMAS[Mycolic acid cyclopropane synthetase];PF13489.1|Methyltransf_23[Methyltransferase domain]	.	GO:0006679;GO:0008168;GO:0030447;GO:0016021;GO:0032259;GO:0009405;GO:0005886	.	TMH:2	C1_09680W_A	MTS1
2h	B9J08_002921	40S ribosomal protein S11-A	PF00366.15|Ribosomal_S17[Ribosomal protein S17];TIGR03630[arch_S17P: archaeal ribosomal protein S17P]	.	GO:0005840;GO:0006412;GO:0003735	.	.	C5_01540W_A	.
2h	B9J08_002961	40S ribosomal protein S8-B	PF01201.17|Ribosomal_S8e[Ribosomal protein S8e];TIGR00307[S8e: ribosomal protein S8.e]	.	GO:0000462;GO:0030686;GO:0006412;GO:0003735;GO:0022627	.	.	C2_05610C_A	RPS8A
2h	B9J08_001105	hypothetical protein	PF01078.16|Mg_chelatase[Magnesium chelatase, subunit ChlI];PF00493.18|MCM[MCM2/3/5 family];PF14551.1|MCM_N[MCM N-terminal domain]	.	GO:0003688;GO:0005524;GO:0006268;GO:0005737;GO:0031298;GO:0009378;GO:0005656;GO:0042555;GO:0000727;GO:0006270;GO:0043142;GO:0006271;GO:0031261;GO:0006267;GO:0097373;GO:0043140	ko04113[Meiosis - yeast];ko04111[Cell cycle - yeast];ko04110[Cell cycle]	.	CR_02110W_A	MCM6
2h	B9J08_004147	elongation factor G%2C mitochondrial	PF00679.19|EFG_C[Elongation factor G C-terminus];TIGR00484[EF-G: translation elongation factor G];PF14492.1|EFG_II[Elongation Factor G, domain II];PF00009.22|GTP_EFTU[Elongation factor Tu GTP binding domain];PF03144.20|GTP_EFTU_D2[Elongation factor Tu domain 2];PF03764.13|EFG_IV[Elongation factor G, domain IV]	.	GO:0003746;GO:0005525;GO:0005739;GO:0070125;GO:0003924	.	.	C1_13060C_A	.
2h	B9J08_000461	40S ribosomal protein S27-B	PF01667.12|Ribosomal_S27e[Ribosomal protein S27]	.	GO:0005840;GO:0046872;GO:0006412;GO:0003735	.	.	CR_07630C_A	RPS27
2h	B9J08_003919	60S ribosomal protein L27	PF01777.13|Ribosomal_L27e[Ribosomal L27e protein family]	.	GO:0005840;GO:0005634;GO:0005829;GO:0006412;GO:0003735;GO:0030687	.	.	C1_12390C_A	RPL27A
2h	B9J08_003031	hypothetical protein	PF00533.21|BRCT[BRCA1 C Terminus (BRCT) domain];PF06732.6|Pescadillo_N[Pescadillo N-terminus]	.	GO:0044786;GO:0000462;GO:0005654;GO:0036170;GO:0035690;GO:0009267;GO:0000466;GO:0030687;GO:0070545;GO:0000463;GO:1900435;GO:0043021;GO:0009405	.	.	C2_09320C_A	PES1
2h	B9J08_000185	40S ribosomal protein S7-A	PF01251.13|Ribosomal_S7e[Ribosomal protein S7e]	.	GO:0005840;GO:0009986;GO:0006412;GO:0003735	.	.	C3_01490W_A	RPS7A
2h	B9J08_002277	hypothetical protein	PF00831.18|Ribosomal_L29[Ribosomal L29 protein];TIGR00012[L29: ribosomal protein L29]	.	GO:0005840;GO:0005730;GO:0005829;GO:0006412;GO:0003735	.	.	C3_04960W_A	RPL35
2h	B9J08_005099	60S ribosomal protein L5	PF14204.1|Ribosomal_L18_c[Ribosomal L18 C-terminal region];PF00861.17|Ribosomal_L18p[Ribosomal L18p/L5e family]	.	GO:0006412;GO:0000027;GO:0022625;GO:0016021;GO:0008097;GO:0003735	.	.	C7_01790C_A	RPL5
2h	B9J08_005338	hypothetical protein	PF00400.27|WD40[WD domain, G-beta repeat]	.	GO:0072686;GO:0000462;GO:0030686;GO:0032040;GO:0045943;GO:0034455	.	.	C3_02130W_A	UTP4
2h	B9J08_003249	60S ribosomal protein L13	PF01294.13|Ribosomal_L13e[Ribosomal protein L13e]	.	GO:0005840;GO:0005829;GO:0006412;GO:0003735	.	.	C1_03020C_A	RPL13
2h	B9J08_004391	60S ribosomal protein L43	TIGR00280[L37a: ribosomal protein L37a];PF01780.14|Ribosomal_L37ae[Ribosomal L37ae protein family]	.	GO:0005840;GO:0006412;GO:0003735	.	.	C5_04590C_A	RPL43A
2h	B9J08_000878	60S ribosomal protein L33-A	PF01247.13|Ribosomal_L35Ae[Ribosomal protein L35Ae]	.	GO:0005840;GO:0006412;GO:0003735	.	.	C2_05710C_A	.
2h	B9J08_004067	40S ribosomal protein S5	PF00177.16|Ribosomal_S7[Ribosomal protein S7p/S5e];TIGR01028[S7_S5_E_A: ribosomal protein S7]	.	GO:0016020;GO:0003723;GO:0006407;GO:0006412;GO:0003735;GO:0022627	.	.	C5_03070W_A	RPS5
2h	B9J08_000142	40S ribosomal protein S26-B	PF01283.14|Ribosomal_S26e[Ribosomal protein S26e]	.	GO:0005840;GO:0006412;GO:0003735	.	.	C2_01610C_A	RPS26A
2h	B9J08_004990	40S ribosomal protein S2	TIGR01020[rpsE_arch: ribosomal protein S5];PF00333.15|Ribosomal_S5[Ribosomal protein S5, N-terminal domain];PF03719.10|Ribosomal_S5_C[Ribosomal protein S5, C-terminal domain]	.	GO:0070181;GO:0032040;GO:0006407;GO:0006412;GO:0003735;GO:0022627;GO:0045903	.	.	C1_01480C_A	RPS21
2h	B9J08_004943	hypothetical protein	PF04622.7|ERG2_Sigma1R[ERG2 and Sigma1 receptor like protein]	EC:5.-.-.-[Isomerases.]	GO:0005783;GO:0035690;GO:0000247;GO:0016021;GO:0006696	.	TMH:1	C1_00800C_A	ERG2
2h	B9J08_001460	hypothetical protein	.	.	GO:0005739	.	.	C5_01700W_A	.
2h	B9J08_004500	hydroxymethylglutaryl-CoA synthase	PF01154.12|HMG_CoA_synt_N[Hydroxymethylglutaryl-coenzyme A synthase N terminal];PF08540.5|HMG_CoA_synt_C[Hydroxymethylglutaryl-coenzyme A synthase C terminal];TIGR01833[HMG-CoA-S_euk: hydroxymethylglutaryl-CoA synthase]	EC:2.3.3.10[Hydroxymethylglutaryl-CoA synthase.]	GO:0036180;GO:0004421;GO:0005634;GO:0036170;GO:0035690;GO:0009267;GO:0006696;GO:0010142;EC:2.3.3.10;GO:0005829;GO:0006084;GO:0070317	ko00900[Terpenoid backbone biosynthesis];ko00280[Valine, leucine and isoleucine degradation];ko00650[Butanoate metabolism]	.	CR_09160C_A	ERG13
2h	B9J08_003677	40S ribosomal protein S23	TIGR00982[S23_S12_E_A: ribosomal protein S23 (S12)];PF00164.20|Ribosom_S12_S23[Ribosomal protein S12/S23]	.	GO:0006412;GO:0003735;GO:0022627	.	.	C1_06580W_A	RPS23A
2h	B9J08_000711	60S acidic ribosomal protein P0	PF00428.14|Ribosomal_60s[60s Acidic ribosomal protein];PF00466.15|Ribosomal_L10[Ribosomal protein L10]	.	GO:0002181;GO:0000027;GO:0022625;GO:0003735;GO:0070180	.	.	C7_00990W_A	RPP0
2h	B9J08_003107	40S ribosomal protein S10-A	PF03501.10|S10_plectin[Plectin/S10 domain]	.	GO:0030446;GO:0009986;GO:0006412;GO:0003735;GO:0022627	.	.	C2_08040C_A	RPS10
2h	B9J08_003393	60S ribosomal protein L34-B	PF01199.13|Ribosomal_L34e[Ribosomal protein L34e]	.	GO:0042254;GO:0003723;GO:0006412;GO:0022625;GO:0003735	.	.	C1_06890C_A	.
2h	B9J08_005150	60S ribosomal protein L2-A	PF00181.18|Ribosomal_L2[Ribosomal Proteins L2, RNA binding domain];PF03947.13|Ribosomal_L2_C[Ribosomal Proteins L2, C-terminal domain]	.	GO:0005840;GO:0006412;GO:0003735	.	.	C1_11060C_A	RPL2
2h	B9J08_002429	asparagine synthetase [glutamine-hydrolyzing] 2	PF12481.3|DUF3700[Aluminium induced protein];PF13522.1|GATase_6[Glutamine amidotransferase domain];TIGR01536[asn_synth_AEB: asparagine synthase (glutamine-hydrolyzing)];PF13537.1|GATase_7[Glutamine amidotransferase domain];PF00733.16|Asn_synthase[Asparagine synthase]	EC:6.3.5.4[Asparagine synthase (glutamine-hydrolyzing).]	GO:0006529;EC:6.3.5.4;GO:0004066	ko00910[Nitrogen metabolism]	.	C2_09060C_A	ASN1
2h	B9J08_001081	60S ribosomal protein L23-B	PF00238.14|Ribosomal_L14[Ribosomal protein L14p/L23e]	.	GO:0005840;GO:0006412;GO:0003735	.	.	C6_02070C_A	RPL23A
2h	B9J08_001922	60S ribosomal protein L10a	PF00687.16|Ribosomal_L1[Ribosomal protein L1p/L10e family]	.	GO:0003723;GO:0015934;GO:0006412;GO:0003735	.	.	C6_02240C_A	RPL10A
2h	B9J08_000996	ATP-dependent RNA helicase eIF4A	PF00271.26|Helicase_C[Helicase conserved C-terminal domain];PF00270.24|DEAD[DEAD/DEAH box helicase]	.	GO:0006413;GO:0003743;GO:0005524;GO:0005829;GO:0008026	.	.	C1_01350C_A	TIF
2h	B9J08_003273	40S ribosomal protein S18-B	PF00416.17|Ribosomal_S13[Ribosomal protein S13/S18]	.	GO:0003723;GO:0005762;GO:0006412;GO:0003735	.	.	C7_00960W_A	RPS18
2h	B9J08_002116	asparagine-tRNA ligase%2C cytoplasmic	TIGR00457[asnS: asparagine--tRNA ligase];PF00152.15|tRNA-synt_2[tRNA synthetases class II (D, K and N)];PF01336.20|tRNA_anti-codon[OB-fold nucleic acid binding domain]	EC:6.1.1.22[Asparagine--tRNA ligase.]	GO:0006421;GO:0005524;GO:0005829;EC:6.1.1.22;GO:0004816;GO:0003676	.	.	C7_03670W_A	DED81
2h	B9J08_004999	60S acidic ribosomal protein P2-A	PF00428.14|Ribosomal_60s[60s Acidic ribosomal protein]	.	GO:0005840;GO:0006414;GO:0003735	.	.	.	.
2h	B9J08_003217	hypothetical protein	PF01842.20|ACT[ACT domain];PF00696.23|AA_kinase[Amino acid kinase family]	EC:2.7.2.4[Aspartate kinase.]	GO:0016310;GO:0016597;GO:0009088;EC:2.7.2.4;GO:0004072;GO:0009089;GO:0005829;GO:0009090;GO:0009086	ko00270[Cysteine and methionine metabolism];ko00300[Lysine biosynthesis]	.	C4_05540W_A	HOM3
2h	B9J08_004672	40S ribosomal protein S22	PF00410.14|Ribosomal_S8[Ribosomal protein S8]	.	GO:0005840;GO:0006412;GO:0003735	.	.	C1_03620C_A	.
2h	B9J08_001851	60S ribosomal protein L15-A	PF00827.12|Ribosomal_L15e[Ribosomal L15]	.	GO:0005840;GO:0006412;GO:0003735	.	.	CR_04100C_A	RPL15A
2h	B9J08_005382	60S ribosomal protein L32	PF01655.13|Ribosomal_L32e[Ribosomal protein L32]	.	GO:0006412;GO:0022625;GO:0003735	.	.	C6_01700W_A	RPL32
2h	B9J08_001278	60S ribosomal protein L16-B	PF00572.13|Ribosomal_L13[Ribosomal protein L13];TIGR01077[L13_A_E: ribosomal protein L13]	.	GO:0015934;GO:0006412;GO:0003735	.	.	C1_00180W_A	RPL16A
2h	B9J08_000120	hypothetical protein	PF04950.7|DUF663[Protein of unknown function (DUF663)];PF08142.7|AARP2CN[AARP2CN (NUC121) domain]	.	GO:0005730;GO:0006364;GO:0043021;GO:0005737	.	.	CR_08490W_A	TSR1
2h	B9J08_002126	hypothetical protein	PF01150.12|GDA1_CD39[GDA1/CD39 (nucleoside phosphatase) family]	EC:3.6.1.42[Guanosine-diphosphatase.]	EC:3.6.1.6;GO:0045134;GO:0036244;GO:0004382;GO:0036178;GO:0000139;EC:3.6.1.42;GO:0006493;GO:0016021;GO:0009272;GO:0036187	.	TMH:1	C3_06120C_A	GDA1
2h	B9J08_003127	60S ribosomal protein L17-B	TIGR01038[L22_arch: ribosomal protein L22];PF00237.14|Ribosomal_L22[Ribosomal protein L22p/L17e]	.	GO:0009986;GO:0035690;GO:0015934;GO:0006412;GO:0003735	.	.	C2_04600C_A	RPL17B
2h	B9J08_000091	40S ribosomal protein S19-A	PF01090.14|Ribosomal_S19e[Ribosomal protein S19e]	.	GO:0000028;GO:0006412;GO:0003735;GO:0022627	.	.	C3_05200W_A	RPS19A
2h	B9J08_005458	guanine nucleotide-binding protein subunit beta-like protein	PF00400.27|WD40[WD domain, G-beta repeat]	.	GO:0060733;GO:0010255;GO:0000747;GO:0036244;GO:0036170;GO:0031139;GO:0035556;GO:0031954;GO:0005092;GO:0036178;GO:0001403;GO:0017148;GO:0004871;GO:0043022;GO:0007186;GO:0036180;GO:0032995;GO:0050790;GO:0005080;GO:0007155;GO:0001965;GO:0034613;GO:0022627;GO:0009405.	.	.	C7_01250W_A	ASC1
2h	B9J08_002225	hypothetical protein	PF04104.9|DNA_primase_lrg[Eukaryotic and archaeal DNA primase, large subunit]	EC:2.7.7.-[Nucleotidyltransferases.]	GO:0003677;GO:0006269;GO:0003896;GO:0005635;GO:0006302;GO:0003887;GO:0046872;GO:0071897;GO:0005829;GO:0051539;GO:0005658;EC:2.7.7.7;GO:1990077	ko03030[DNA replication];ko00240[Pyrimidine metabolism]	.	C4_06490C_A	PRI2
2h	B9J08_001870	40S ribosomal protein S13	PF00312.17|Ribosomal_S15[Ribosomal protein S15];PF08069.7|Ribosomal_S13_N[Ribosomal S13/S15 N-terminal domain]	.	GO:0000462;GO:0030686;GO:0070181;GO:0005730;GO:0002181;GO:0003735;GO:0022627	.	.	C6_00650C_A	RPS13
2h	B9J08_002632	glutamine-fructose-6-phosphate aminotransferase [isomerizing]	PF13522.1|GATase_6[Glutamine amidotransferase domain];PF13537.1|GATase_7[Glutamine amidotransferase domain];PF00310.16|GATase_2[Glutamine amidotransferases class-II];PF01380.17|SIS[SIS domain];TIGR01135[glmS: glutamine-fructose-6-phosphate transaminase (isomerizing)];PF13230.1|GATase_4[Glutamine amidotransferases class-II]	EC:2.6.1.16[Glutamine--fructose-6-phosphate transaminase (isomerizing).]	EC:2.6.1.16;GO:0035690;GO:0006038;GO:0030448;GO:0006541;GO:0030246;GO:0006048;GO:0006487;GO:0006042;GO:0004360	ko00520[Amino sugar and nucleotide sugar metabolism]	.	C3_02280C_A	GFA1
2h	B9J08_004269	hypothetical protein	PF01161.15|PBP[Phosphatidylethanolamine-binding protein]	.	GO:0005762;GO:0003735	.	.	C2_03560C_A	.
2h	B9J08_000064	60S ribosomal protein L11-A	PF00281.14|Ribosomal_L5[Ribosomal protein L5];PF00673.16|Ribosomal_L5_C[ribosomal L5P family C-terminus]	.	GO:0005840;GO:0006412;GO:0003735	.	.	C2_06810C_A	RPL11
2h	B9J08_000254	40S ribosomal protein S17-B	PF00833.13|Ribosomal_S17e[Ribosomal S17]	.	GO:0005840;GO:0006412;GO:0003735	.	.	C1_10870W_A	RPS17B
2h	B9J08_001675	hypothetical protein	PF13604.1|AAA_30[AAA domain];PF13086.1|AAA_11[AAA domain];PF13245.1|AAA_19[Part of AAA domain];PF13087.1|AAA_12[AAA domain];PF00580.16|UvrD-helicase[UvrD/REP helicase N-terminal domain];PF08696.6|Dna2[DNA replication factor Dna2]	EC:3.6.4.12[DNA helicase.]	GO:0000784;GO:0000733;GO:0000706;GO:0032508;GO:0005737;GO:0051539;GO:0000737;GO:0017108;GO:0000014;GO:0043142;GO:0004003;GO:0043139;GO:0035861;GO:0006273;GO:0001302;GO:0000723	.	.	C6_00320C_A	DNA2
2h	B9J08_000136	hypothetical protein	PF01781.13|Ribosomal_L38e[Ribosomal L38e protein family]	.	GO:0006412;GO:0022625;GO:0003735	.	.	C2_00210W_A	RPL38
2h	B9J08_001803	rRNA 2'-O-methyltransferase fibrillarin	PF01269.12|Fibrillarin[Fibrillarin];PF08704.5|GCD14[tRNA methyltransferase complex GCD14 subunit]	EC:2.1.1.-[Methyltransferases.]	GO:1990259;GO:0005840;GO:0003723;GO:0030686;GO:0031428;GO:0006356;GO:0008033;GO:0031167;GO:0000228;GO:0032040;GO:0000494;GO:0008649;GO:1990258	.	.	C4_06720W_A	NOP1
2h	B9J08_001130	hypothetical protein	.	.	GO:0007129;GO:0071168;GO:0051455;GO:0007076;GO:0006302;GO:2000817;GO:0000794;GO:0005829;GO:0007064	.	.	C2_07660W_A	PDS5
2h	B9J08_003582	40S ribosomal protein S4	PF01479.20|S4[S4 domain];PF00900.15|Ribosomal_S4e[Ribosomal family S4e];PF08071.7|RS4NT[RS4NT (NUC023) domain];PF00467.24|KOW[KOW motif]	.	GO:0005840;GO:0006412;GO:0003735;GO:0019843	.	.	C1_01640W_A	RPS42
2h	B9J08_000823	60S ribosomal protein L44	PF00935.14|Ribosomal_L44[Ribosomal protein L44]	.	GO:0046677;GO:0046898;GO:0006412;GO:0022625;GO:0003735	.	.	C1_10390C_A	RPL42
2h	B9J08_000102	heat shock protein SSB1	PF00012.15|HSP70[Hsp70 protein];PF06723.8|MreB_Mbl[MreB/Mbl protein]	.	GO:0044416;GO:0009986;GO:0005524;GO:0030445;GO:0005829;GO:0044182;GO:0006412;GO:0005886	ko04144[Endocytosis];ko04010[MAPK signaling pathway];ko05162[Measles];ko04141[Protein processing in endoplasmic reticulum];ko04612[Antigen processing and presentation];ko05145[Toxoplasmosis]	.	CR_08090W_A	SSB1
2h	B9J08_002367	60S ribosomal protein L9-B	PF00347.18|Ribosomal_L6[Ribosomal protein L6]	.	GO:0005840;GO:0006412;GO:0003735;GO:0019843	.	.	C3_02470C_A	RPL9B
2h	B9J08_001974	40S ribosomal protein S3	TIGR01008[rpsC_E_A: ribosomal protein S3];PF07650.12|KH_2[KH domain];PF00189.15|Ribosomal_S3_C[Ribosomal protein S3, C-terminal domain]	.	GO:0003906;GO:0003723;GO:0006407;GO:0000056;EC:4.2.99.18;GO:0006412;GO:0030688;GO:0022627;GO:0003735;GO:0000737	.	.	CR_04810W_A	RPS3
2h	B9J08_003882	phospho-2-dehydro-3-deoxyheptonate aldolase%2C tyrosine-inhibited	TIGR00034[aroFGH: 3-deoxy-7-phosphoheptulonate synthase];PF00793.15|DAHP_synth_1[DAHP synthetase I family]	EC:2.5.1.54[3-deoxy-7-phosphoheptulonate synthase.]	EC:2.5.1.54;GO:0009423;GO:0005634;GO:0003849;GO:0009073;GO:0005737	.	.	C1_05110C_A	ARO4
2h	B9J08_004574	60S ribosomal protein L7	PF00327.15|Ribosomal_L30[Ribosomal protein L30p/L7e];PF08079.7|Ribosomal_L30_N[Ribosomal L30 N-terminal domain]	.	GO:0005840;GO:0009986	.	.	C1_05720W_A	.
2h	B9J08_003055	eukaryotic translation initiation factor 3 subunit G	PF14259.1|RRM_6[RNA recognition motif (a.k.a. RRM, RBD, or RNP domain)];PF13893.1|RRM_5[RNA recognition motif. (a.k.a. RRM, RBD, or RNP domain)];PF00076.17|RRM_1[RNA recognition motif. (a.k.a. RRM, RBD, or RNP domain)];PF12353.3|eIF3g[Eukaryotic translation initiation factor 3 subunit G]	.	GO:0005634;GO:0001731;GO:0016282;GO:0043614;GO:0071541;GO:0006446;GO:0003743;GO:0002188;GO:0071540;GO:0005829;GO:0000166;GO:0033290	.	.	C1_14260C_A	TIF35
2h	B9J08_004396	hypothetical protein	PF02777.13|Sod_Fe_C[Iron/manganese superoxide dismutases, C-terminal domain]	EC:1.15.1.1[Superoxide dismutase.]	GO:0019430;GO:0004784;GO:0035690;GO:0005763;GO:0055114;EC:1.15.1.1;GO:0046872;GO:0003735	ko05016[Huntington's disease]	.	C5_04530W_A	.
2h	B9J08_002345	nascent polypeptide-associated complex subunit alpha	PF01849.13|NAC[NAC domain]	.	GO:0005634;GO:0070300;GO:0032266;GO:0051083;GO:0009986;GO:0080025;GO:0005854;GO:0051082;GO:0070273;GO:0006620	.	.	C3_04140C_A	EGD2
2h	B9J08_005046	hypothetical protein	PF11788.3|MRP-L46[39S mitochondrial ribosomal protein L46]	.	GO:0005762;GO:0003735	.	.	C5_00820W_A	.
2h	B9J08_004958	60S ribosomal protein L6-B	PF01159.14|Ribosomal_L6e[Ribosomal protein L6e]	.	GO:0005730;GO:0002181;GO:0000027;GO:0022625;GO:0003735	.	.	C1_03110W_A	RPL6
2h	B9J08_001589	hypothetical protein	PF03690.8|UPF0160[Uncharacterised protein family (UPF0160)]	.	GO:0005634;GO:0005737	.	.	C1_01910W_A	.
2h	B9J08_003942	hypothetical protein	PF01151.13|ELO[GNS1/SUR4 family]	EC:2.3.1.-[Transferring groups other than amino-acyl groups.]	GO:0016021;GO:0006633;GO:0016740	TMH:7	.	C1_12790C_A	FEN1
2h	B9J08_003313	60S ribosomal protein L4-A	PF00573.17|Ribosomal_L4[Ribosomal protein L4/L1 family];PF14374.1|Ribos_L4_asso_C[60S ribosomal protein L4 C-terminal domain]	.	GO:0016020;GO:0005840;GO:0009986;GO:0006412;GO:0003735	.	.	C1_14110C_A	RPL4B
2h	B9J08_000263	hypothetical protein	PF08613.6|Cyclin[Cyclin];PF00134.18|Cyclin_N[Cyclin, N-terminal domain]	.	GO:0000079;GO:0019901	.	.	C1_08570C_A	PCL2
2h	B9J08_001686	40S ribosomal protein S4	PF01479.20|S4[S4 domain];PF00900.15|Ribosomal_S4e[Ribosomal family S4e];PF08071.7|RS4NT[RS4NT (NUC023) domain];PF00467.24|KOW[KOW motif]	.	GO:0005840;GO:0006412;GO:0003735;GO:0019843	.	.	C1_01640W_A	RPS42
2h	B9J08_005234	hypothetical protein	PF11715.3|Nup160[Nucleoporin Nup120/160]	.	.	.	.	C4_01660W_A	.
2h	B9J08_001735	hypothetical protein	PF10516.4|SHNi-TPR[SHNi-TPR]	.	GO:0043229;GO:0006325	.	.	C1_04490W_A	.
2h	B9J08_003242	hypothetical protein	PF14700.1|RPOL_N[DNA-directed RNA polymerase N-terminal];PF00940.14|RNA_pol[DNA-dependent RNA polymerase]	EC:2.7.7.6[DNA-directed RNA polymerase.]	GO:0006390;GO:0003899;GO:0003677;EC:2.7.7.6;GO:0042645;GO:0034245;GO:0000002	.	.	C1_00640C_A	RPO41
2h	B9J08_003433	hypothetical protein	PF13893.1|RRM_5[RNA recognition motif. (a.k.a. RRM, RBD, or RNP domain)];PF00076.17|RRM_1[RNA recognition motif. (a.k.a. RRM, RBD, or RNP domain)]	.	GO:0010494;GO:0031369;GO:0001731;GO:0016282;GO:0043614;GO:0071541;GO:0006446;GO:0003743;GO:0071540;GO:0005829;GO:0000166;GO:0033290	.	.	C7_01450C_A	PRT1
2h	B9J08_002473	ribosomal protein S15	PF00312.17|Ribosomal_S15[Ribosomal protein S15];TIGR00952[S15_bact: ribosomal protein S15]	.	GO:0006412;GO:0005763;GO:0003735	.	.	CR_01370C_A	.
2h	B9J08_000420	hypothetical protein	.	.	GO:0005634;GO:0005739;GO:0009060	.	.	C5_01080C_A	GDS1
2h	B9J08_003432	eukaryotic translation initiation factor 3 subunit B	PF08662.6|eIF2A[Eukaryotic translation initiation factor eIF2A]	.	GO:0010494;GO:0035690;GO:0031369;GO:0001731;GO:0009277;GO:0016282;GO:0043614;GO:0071541;GO:0006446;GO:0003743;GO:0071540;GO:0000166;GO:0005829;GO:0033290	.	.	C7_01450C_A	PRT1
2h	B9J08_001135	deoxyhypusine hydroxylase	PF03130.11|HEAT_PBS[PBS lyase HEAT-like repeat];PF13646.1|HEAT_2[HEAT repeats]	EC:1.14.99.29[Deoxyhypusine monooxygenase.]	GO:0000226;GO:0005634;GO:0019135;GO:0055114;GO:0008612;GO:0005737;GO:0036178;GO:0016829;GO:0046872;EC:1.14.99.29;GO:0044011	.	.	C2_07290W_A	.
2h	B9J08_000351	methionine-tRNA ligase%2C beta subunit	PF01588.15|tRNA_bind[Putative tRNA binding domain]	.	GO:0051351;GO:0004825;GO:0032266;GO:0000049;GO:0017102;GO:0080025;GO:0006418;GO:0008047;EC:6.1.1.10	.	.	CR_03060W_A	ARC1
2h	B9J08_003485	N2%2CN2-dimethylguanosine tRNA methyltransferase	PF02005.11|TRM[N2,N2-dimethylguanosine tRNA methyltransferase];TIGR00308[TRM1: N2,N2-dimethylguanosine tRNA methyltransferase]	EC:2.1.1.216[tRNA (guanine(26)-N(2))-dimethyltransferase.];EC:2.1.1.215[tRNA (guanine(26)-N(2)/guanine(27)-N(2))-dimethyltransferase.]	GO:0004809;GO:0003723;GO:0005634;GO:0002940	.	.	CR_00900W_A	TRM1
2h	B9J08_000200	leucine-tRNA ligase	PF13603.1|tRNA-synt_1_2[Leucyl-tRNA synthetase, Domain 2];PF09334.6|tRNA-synt_1g[tRNA synthetases class I (M)];PF00133.17|tRNA-synt_1[tRNA synthetases class I (I, L, M and V)];PF08264.8|Anticodon_1[Anticodon-binding domain of tRNA];TIGR00396[leuS_bact: leucine--tRNA ligase]	EC:6.1.1.4[Leucine--tRNA ligase.]	EC:6.1.1.4;GO:0004823;GO:0003729;GO:0005524;GO:0002161;GO:0006429;GO:0006450;GO:0032543;GO:0000372;GO:0005739	ko00970[Aminoacyl-tRNA biosynthesis]	.	C6_03450C_A	NAM2
2h	B9J08_001917	hypothetical protein	PF14497.1|GST_C_3[Glutathione S-transferase, C-terminal domain];PF13410.1|GST_C_2[Glutathione S-transferase, C-terminal domain];PF00043.20|GST_C[Glutathione S-transferase, C-terminal domain];PF00647.14|EF1G[Elongation factor 1 gamma, conserved domain]	.	GO:0004364;GO:0006749;GO:0005634;GO:0003746;GO:0006414;EC:2.5.1.18;GO:0005737	.	.	C3_06010W_A	CAM1
2h	B9J08_002629	acetolactate synthase%2C large subunit%2C biosynthetic type	TIGR00118[acolac_lg: acetolactate synthase, large subunit, biosynthetic type];PF02776.13|TPP_enzyme_N[Thiamine pyrophosphate enzyme, N-terminal TPP binding domain];PF02775.16|TPP_enzyme_C[Thiamine pyrophosphate enzyme, C-terminal TPP binding domain];PF00205.17|TPP_enzyme_M[Thiamine pyrophosphate enzyme, central domainEC:2.2.1.6[Acetolactate synthase.]	GO:0009099;GO:0000287;GO:0005948;EC:2.2.1.6;GO:0050660;GO:0009097;GO:0030976;GO:0003984	ko00770[Pantothenate and CoA biosynthesis];ko00660[C5-Branched dibasic acid metabolism];ko00650[Butanoate metabolism]	.	.	C3_02320W_A	ILV2
2h	B9J08_000816	nucleoside diphosphate kinase	PF00334.14|NDK[Nucleoside diphosphate kinase]	EC:2.7.4.6[Nucleoside-diphosphate kinase.]	GO:0005634;GO:0005524;GO:0006241;GO:0042802;GO:0005758;GO:0004550;GO:0006228;EC:2.7.4.6;GO:0005829;GO:0061508;GO:0006974;GO:0006183	ko00240[Pyrimidine metabolism]	.	C5_02890W_A	YNK1
2h	B9J08_002152	hypothetical protein	PF00838.12|TCTP[Translationally controlled tumour protein]	.	GO:0005874;GO:0034599;GO:0005829;GO:0002181;GO:0097311;GO:0005739;GO:0055114;GO:0016491	.	.	CR_00860C_A	TMA19
2h	B9J08_003560	hypothetical protein	PF00333.15|Ribosomal_S5[Ribosomal protein S5, N-terminal domain];PF03719.10|Ribosomal_S5_C[Ribosomal protein S5, C-terminal domain]	.	GO:0003723;GO:0006412;GO:0005763;GO:0003735	.	.	C1_10470W_A	.
2h	B9J08_000554	60S ribosomal protein L25	PF00276.15|Ribosomal_L23[Ribosomal protein L23];PF03939.8|Ribosomal_L23eN[Ribosomal protein L23, N-terminal domain]	.	GO:0000166;GO:0006412;GO:0000027;GO:0022625;GO:0003735;GO:0019843	.	.	C6_01970C_A	RPL25
2h	B9J08_003023	60S ribosomal protein L3	PF00297.17|Ribosomal_L3[Ribosomal protein L3]	.	GO:0009986;GO:0032040;GO:0006412;GO:0000027;GO:0022625;GO:0003735	.	.	C2_09430W_A	RPL3
2h	B9J08_000345	hypothetical protein	PF01966.17|HD[HD domain];PF13023.1|HD_3[HD domain]	.	GO:0005634;GO:0005829	.	.	CR_03020C_A	.
2h	B9J08_000226	hypothetical protein	PF14259.1|RRM_6[RNA recognition motif (a.k.a. RRM, RBD, or RNP domain)];PF13893.1|RRM_5[RNA recognition motif. (a.k.a. RRM, RBD, or RNP domain)];PF00076.17|RRM_1[RNA recognition motif. (a.k.a. RRM, RBD, or RNP domain)]	.	GO:0000166;GO:0003676	.	.	C7_00440C_A	GBP2
2h	B9J08_004381	hypothetical protein	PF01704.13|UDPGP[UTP--glucose-1-phosphate uridylyltransferase]	EC:2.7.7.23[UDP-N-acetylglucosamine diphosphorylase.]	GO:0005634;GO:0003977;GO:0006048;EC:2.7.7.23	.	.	C5_02530W_A	UAP1
2h	B9J08_004493	hypothetical protein	PF12807.2|eIF3_p135[Translation initiation factor eIF3 subunit 135];PF13236.1|CLU[Clustered mitochondria];PF15044.1|CLU_N[Mitochondrial function, CLU-N-term];PF13424.1|TPR_12[Tetratricopeptide repeat]	.	GO:0009987;GO:0005737	.	.	C1_04970W_A	.
2h	B9J08_004921	hypothetical protein	PF01873.12|eIF-5_eIF-2B[Domain found in IF2B/IF5]	.	GO:0043614;GO:0016282;GO:0003743;GO:0003729;GO:0006355;GO:0008270;GO:0005850;GO:0031369;GO:0001731	.	.	C7_04130C_A	SUI3
2h	B9J08_000384	hypothetical protein	PF07983.8|X8[X8 domain];PF02836.12|Glyco_hydro_2_C[Glycosyl hydrolases family 2, TIM barrel domain];PF03198.9|Glyco_hydro_72[Glucanosyltransferase]	.	GO:0043231;GO:0042124;GO:0031505;GO:0030446;GO:0009986;GO:0030445;GO:0016021;GO:0005975;GO:0046658;GO:0009405;GO:0044444	.	.	C1_00220W_A	PHR2
2h	B9J08_002291	nascent polypeptide-associated complex subunit beta	PF01849.13|NAC[NAC domain]	.	GO:0003677;GO:0005634;GO:0006355;GO:0006351;GO:0015031;GO:0005737	.	.	C1_11650W_A	EGD1
2h	B9J08_005253	60S ribosomal protein L37-B	PF01907.14|Ribosomal_L37e[Ribosomal protein L37e]	.	GO:0005840;GO:0046872;GO:0006412;GO:0003735;GO:0019843	.	.	C1_11360W_A	RPL37B
2h	B9J08_000553	hypothetical protein	.	.	GO:0006412;GO:0005763;GO:0003735	.	.	C6_01980C_A	.
2h	B9J08_003855	hypothetical protein	PF12738.2|PTCB-BRCT[twin BRCT domain];PF00533.21|BRCT[BRCA1 C Terminus (BRCT) domain]	.	GO:0035361;GO:0005724;GO:0000775;GO:1902377;GO:0006302;GO:0035861;GO:0005730;GO:0010526;GO:0000018;GO:0006301	.	.	C2_01400C_A	ESC4
2h	B9J08_001703	hypothetical protein	PF00618.15|RasGEF_N[RasGEF N-terminal motif];PF00617.14|RasGEF[RasGEF domain];PF00018.23|SH3_1[SH3 domain]	.	GO:0065007	.	.	CR_06910W_A	BUD5
2h	B9J08_005362	hypothetical protein	PF01479.20|S4[S4 domain]	.	GO:0005763;GO:0003735;GO:0019843	.	.	CR_04140W_A	.
2h	B9J08_004956	40S ribosomal protein S1-A	PF01015.13|Ribosomal_S3Ae[Ribosomal S3Ae family]	.	GO:0030446;GO:0006412;GO:0003735;GO:0022627	.	.	C1_03090W_A	RPS1
2h	B9J08_002786	ribosomal protein L7/L12	PF00542.14|Ribosomal_L12[Ribosomal protein L7/L12 C-terminal domain]	.	GO:0005840;GO:0042645;GO:0006412;GO:0003735;GO:0009060	.	.	C2_07190C_A	.
2h	B9J08_002493	hypothetical protein	.	.	GO:0016020	.	.	.	.
2h	B9J08_001877	hypothetical protein	PF01398.16|JAB[JAB1/Mov34/MPN/PAD-1 ubiquitin protease]	.	GO:0016282;GO:0003743;GO:0005634;GO:0005829;GO:0033290;GO:0005852;GO:000173ko05162[Measles]	.	.	C3_07420W_A	.
2h	B9J08_005241	proliferating cell nuclear antigen (pcna)	PF04139.8|Rad9[Rad9];PF02747.10|PCNA_C[Proliferating cell nuclear antigen, C-terminal domain];TIGR00590[pcna: proliferating cell nuclear antigen (pcna)];PF00705.13|PCNA_N[Proliferating cell nuclear antigen, N-terminal domain]	.	GO:0003677;GO:0000781;GO:0006275;GO:1903022;GO:0006289;GO:0030337;GO:0000710;GO:0035753;GO:0006272;GO:0005634;GO:0030466;GO:0043626;GO:0042802;GO:0006348;GO:0070987;GO:0006273;GO:1902394;GO:0034087;GO:0005657	ko03410[Base excision repair];ko03430[Mismatch repair];ko03420[Nucleotide excision repair];ko04110[Cell cycle]	.	C4_01770W_A	POL30
2h	B9J08_005574	hypothetical protein	.	.	.	.	.	.	.
2h	B9J08_004579	elongation factor 1-alpha 2	TIGR00483[EF-1_alpha: translation elongation factor EF-1, subunit alpha];PF03143.12|GTP_EFTU_D3[Elongation factor Tu C-terminal domain];PF00009.22|GTP_EFTU[Elongation factor Tu GTP binding domain];PF03144.20|GTP_EFTU_D2[Elongation factor Tu domain 2]	.	GO:0003746;GO:0006414;GO:0005737;GO:0003924;GO:0030446;GO:0009986;GO:0030445;GO:0005515;GO:0051701;GO:0005525	.	.	C1_08380W_A	TEF2
2h	B9J08_002802	hypothetical protein	PF01281.14|Ribosomal_L9_N[Ribosomal protein L9, N-terminal domain]	.	.	.	.	.	.
2h	B9J08_003467	hypothetical protein	PF01078.16|Mg_chelatase[Magnesium chelatase, subunit ChlI];PF00493.18|MCM[MCM2/3/5 family];PF07728.9|AAA_5[AAA domain (dynein-related subfamily)];PF14551.1|MCM_N[MCM N-terminal domain]	.	GO:0003677;GO:0005634;GO:0005524;GO:0006270;GO:0032508;GO:0042555;GO:0051301;GO:0003678	ko04113[Meiosis - yeast];ko04111[Cell cycle - yeast];ko04110[Cell cycle]	.	C1_12550C_A	CDC54
2h	B9J08_002375	hypothetical protein	PF01488.15|Shikimate_DH[Shikimate / quinate 5-dehydrogenase];PF13460.1|NAD_binding_10[NADH(P)-binding];PF03435.13|Saccharop_dh[Saccharopine dehydrogenase]	EC:1.5.1.10[Saccharopine dehydrogenase (NADP(+), L-glutamate-forming).]	GO:0004755;EC:1.5.1.10;GO:0055114;GO:0005737;GO:0019878	ko00310[Lysine degradation]	.	C3_06590W_A	LYS9
2h	B9J08_005023	hypothetical protein	PF04280.10|Tim44[Tim44-like domain]	.	GO:0030674;GO:0051087;GO:0005886;GO:0030150;GO:0001405	.	.	C3_00250C_A	TIM44
2h	B9J08_000320	D-3-phosphoglycerate dehydrogenase 1	PF00389.25|2-Hacid_dh[D-isomer specific 2-hydroxyacid dehydrogenase, catalytic domain];PF00670.16|AdoHcyase_NAD[S-adenosyl-L-homocysteine hydrolase, NAD binding domain];PF02826.14|2-Hacid_dh_C[D-isomer specific 2-hydroxyacid dehydrogenase, NAD binding domain];PF03446.10|NAD_binding_2[NAD binding domain of 6-phosphogluconate dehydrogenase]	EC:1.1.1.95[Phosphoglycerate dehydrogenase.]	EC:1.1.1.95;GO:0016597;GO:0005829;GO:0006564;GO:0051287;GO:0055114;GO:0004617	ko00680[Methane metabolism]	.	C1_12030W_A	SER33
2h	B9J08_000053	hypothetical protein	PF02064.10|MAS20[MAS20 protein import receptor]	.	GO:0016031;GO:0030943;GO:0005742;GO:0070096;GO:0031307;GO:0030150	.	TMH:1	C1_02640C_A	TOM20
2h	B9J08_005387	eukaryotic translation initiation factor 5A	PF01287.15|eIF-5a[Eukaryotic elongation factor 5A hypusine, DNA-binding OB fold];PF00467.24|KOW[KOW motif];TIGR00037[eIF_5A: translation elongation factor IF5A]	.	GO:0006413;GO:0043022;GO:0003743;GO:0006452;GO:0003746;GO:0045905;GO:0005737;GO:0045901	.	.	C6_01610W_A	ANB1
2h	B9J08_000955	ribosomal protein L24	TIGR01080[rplX_A_E: ribosomal protein L24]	.	GO:0015934;GO:0005730;GO:0005829;GO:0006412;GO:0003735	.	.	C1_02330C_A	.
2h	B9J08_005511	hypothetical protein	PF10441.4|Urb2[Urb2/Npa2 family]	.	GO:0016072;GO:0042254;GO:0005730;GO:0005829	.	.	C3_04370C_A	.
2h	B9J08_000819	hypothetical protein	PF02854.14|MIF4G[MIF4G domain];PF09090.6|MIF4G_like_2[MIF4G like];PF09088.6|MIF4G_like[MIF4G like]	.	GO:0072686;GO:0005634;GO:0000339;GO:0005829;GO:0045292;GO:0051028;GO:0005846	ko03040[Spliceosome];ko03015[mRNA surveillance pathway]	.	C1_08420W_A	GCR3
2h	B9J08_002540	hypothetical protein	.	.	.	.	.	C4_05580C_A	.
2h	B9J08_000632	ubiquitin-40S ribosomal protein S27a	PF11976.3|Rad60-SLD[Ubiquitin-2 like Rad60 SUMO-like];PF01599.14|Ribosomal_S27[Ribosomal protein S27a];PF00240.18|ubiquitin[Ubiquitin family];PF14560.1|Ubiquitin_2[Ubiquitin-like domain]	.	GO:0031386;GO:0000028;GO:0046872;GO:0005634;GO:0002181;GO:0002109;GO:0003735;GO:0022627	.	.	C4_07180W_A	UBI3
2h	B9J08_001674	nucleolar protein 58	PF01798.13|Nop[Putative snoRNA binding domain];PF08060.8|NOSIC[NOSIC (NUC001) domain];PF08156.8|NOP5NT[NOP5NT (NUC127) domain]	.	GO:0030686;GO:0000472;GO:0030447;GO:0031428;GO:0000447;GO:0000480;GO:0032040;GO:0017069	.	.	C6_00370C_A	NOP5
2h	B9J08_003100	hypothetical protein	PF13483.1|Lactamase_B_3[Beta-lactamase superfamily domain];PF07521.7|RMMBL[RNA-metabolising metallo-beta-lactamase];PF00753.22|Lactamase_B[Metallo-beta-lactamase superfamily];PF11718.3|CPSF73-100_C[Pre-mRNA 3'-end-processing endonuclease polyadenylation factor C-term];PF12706.2|Lactamase_B_2[Beta-lactamase superfamily domain];PF10996.3|Beta-Casp[Beta-Casp domain]	EC:3.1.27.-[Endoribonucleases producing other than 5'-phosphomonoesters.]	GO:0042493;GO:0034247;GO:0005847;GO:0006369;GO:0006378;GO:0004521;GO:0046872;GO:0005829;GO:0090502;GO:0031126;GO:0006379	.	.	C2_06230W_A	.
2h	B9J08_002718	60S ribosomal protein L24	PF01246.15|Ribosomal_L24e[Ribosomal protein L24e]	.	GO:0005840	.	.	C4_04890C_A	RPL24A
2h	B9J08_001883	glycolate oxidase%2C subunit GlcD	PF02913.14|FAD-oxidase_C[FAD linked oxidases, C-terminal domain];PF01565.18|FAD_binding_4[FAD binding domain]	EC:1.1.2.4[D-lactate dehydrogenase (cytochrome).]	EC:1.1.2.4;GO:0004458;GO:0050660;GO:0016021;GO:0055114	.	.	C3_07360W_A	DLD2
2h	B9J08_004262	hypothetical protein	PF02724.9|CDC45[CDC45-like protein]	.	GO:0003688;GO:1902977;GO:0000727;GO:0006270;GO:0000790;GO:0031261;GO:0031938;GO:0006267;GO:0003697;GO:0031298;GO:0005656;GO:0005829;GO:0003682	ko04113[Meiosis - yeast];ko04111[Cell cycle - yeast]	.	CR_07720C_A	CDC45
2h	B9J08_003755	40S ribosomal protein S15	TIGR01025[rpsS_arch: ribosomal protein S19];PF00203.16|Ribosomal_S19[Ribosomal protein S19]	.	GO:0003723;GO:0006407;GO:0006412;GO:0003735;GO:0015935	.	.	C3_04670C_A	RPS15
2h	B9J08_001228	hypothetical protein	PF02815.14|MIR[MIR domain];PF02366.13|PMT[Dolichyl-phosphate-mannose-protein mannosyltransferase];PF13231.1|PMT_2[Dolichyl-phosphate-mannose-protein mannosyltransferase]	EC:2.4.1.109[Dolichyl-phosphate-mannose-protein mannosyltransferase.]	GO:0035690;GO:0036178;GO:0004169;GO:0035269;GO:0044011;GO:0016021;GO:0005789;EC:2.4.1.109;GO:0005886;GO:0009405	.	TMH:9	C3_06890W_A	PMT2
2h	B9J08_004085	hypothetical protein	PF06413.6|Neugrin[Neugrin];PF12824.2|MRP-L20[Mitochondrial ribosomal protein subunit L20]	.	GO:0005762;GO:0003735	.	.	C5_03410C_A	.
2h	B9J08_005515	hypothetical protein	PF08996.5|zf-DNA_Pol[DNA Polymerase alpha zinc finger];PF00136.16|DNA_pol_B[DNA polymerase family B];PF12254.3|DNA_pol_alpha_N[DNA polymerase alpha subunit p180 N terminal];PF03104.14|DNA_pol_B_exo1[DNA polymerase family B, exonuclease domain]	EC:2.7.7.7[DNA-directed DNA polymerase.]	GO:0003677;GO:0006270;GO:0001882;GO:0006302;GO:0006279;GO:0003887;GO:0008408;GO:0000731;GO:0000166;GO:0090305;GO:0005658;EC:2.7.7.7;GO:0006278	ko03030[DNA replication];ko00240[Pyrimidine metabolism]	.	C3_04300C_A	POL1
2h	B9J08_000728	hypothetical protein	PF00830.14|Ribosomal_L28[Ribosomal L28 family]	.	GO:0005762;GO:0003735	.	.	C2_03950W_A	.
2h	B9J08_000261	hypothetical protein	PF01266.19|DAO[FAD dependent oxidoreductase];PF08491.5|SE[Squalene epoxidase];PF01494.14|FAD_binding_3[FAD binding domain]	EC:1.14.13.132[Squalene monooxygenase.]	GO:0036171;GO:0036170;GO:0035690;GO:0009267;GO:0031090;GO:0050660;GO:0055114;GO:0008144;GO:0051668;GO:0016021;EC:1.14.13.132;GO:0005886;GO:0036187;GO:0036180;GO:0006696;GO:0005811;GO:0004506;GO:0005789	.	TMH:2	C1_08590C_A	ERG1
2h	B9J08_003274	hypothetical protein	PF00573.17|Ribosomal_L4[Ribosomal protein L4/L1 family]	.	GO:0005762;GO:0006412;GO:0003735	.	.	C7_00950W_A	YML6
2h	B9J08_002746	nucleolar protein 56	PF01798.13|Nop[Putative snoRNA binding domain];PF08060.8|NOSIC[NOSIC (NUC001) domain];PF08156.8|NOP5NT[NOP5NT (NUC127) domain]	.	GO:0007165;GO:0004114;GO:0032040;GO:0016021;EC:3.1.4.17	.	.	CR_09950C_A	SIK1
2h	B9J08_003610	elongation factor 1-alpha 2	TIGR00483[EF-1_alpha: translation elongation factor EF-1, subunit alpha];PF03143.12|GTP_EFTU_D3[Elongation factor Tu C-terminal domain];PF00009.22|GTP_EFTU[Elongation factor Tu GTP binding domain];PF03144.20|GTP_EFTU_D2[Elongation factor Tu domain 2]	.	GO:0003746;GO:0006414;GO:0005737;GO:0003924;GO:0030446;GO:0009986;GO:0030445;GO:0005515;GO:0051701;GO:0005525	.	.	C1_08380W_A	TEF2
2h	B9J08_005442	hypothetical protein	PF00400.27|WD40[WD domain, G-beta repeat];PF12265.3|CAF1C_H4-bd[Histone-binding protein RBBP4 or subunit C of CAF1 complex]	.	GO:0042393;GO:0033554;GO:0006333;GO:0000781;GO:0016746;GO:0016573;GO:0006348;GO:0005737;GO:0000123	.	.	C6_04540C_A	HAT2
2h	B9J08_004148	hypothetical protein	.	.	GO:0009986;GO:0005576	.	.	C1_13080W_A	OP4
2h	B9J08_005340	sterol 24-C-methyltransferase	PF12847.2|Methyltransf_18[Methyltransferase domain];PF13659.1|Methyltransf_26[Methyltransferase domain];PF08242.7|Methyltransf_12[Methyltransferase domain];PF13649.1|Methyltransf_25[Methyltransferase domain];PF08241.7|Methyltransf_11[Methyltransferase domain];PF01209.13|Ubie_methyltran[ubiE/COQ5 methyltransferase family];PF13489.1|Methyltransf_23[Methyltransferase domain];PF09445.5|Methyltransf_1…	EC:2.1.1.41[Sterol 24-C-methyltransferase.]	GO:0003838;GO:0035690;GO:0006696;GO:0032259;GO:0005886;EC:2.1.1.41	.	.	C3_02150C_A	ERG6
2h	B9J08_002424	hypothetical protein	PF01078.16|Mg_chelatase[Magnesium chelatase, subunit ChlI];PF00493.18|MCM[MCM2/3/5 family];PF07728.9|AAA_5[AAA domain (dynein-related subfamily)];PF14551.1|MCM_N[MCM N-terminal domain]	.	GO:0003688;GO:0000781;GO:0005524;GO:0006268;GO:1990518;GO:0005737;GO:0033679;GO:0006357;GO:0003697;GO:0031298;GO:0009378;GO:0003682;GO:0005656;GO:0042555;GO:0003712;GO:0003727;GO:0030466;GO:0000727;GO:0003724;GO:0006270;GO:0006348;GO:0006271;GO:0000790;GO:0031261;GO:0006267;GO:0097373	ko04113[Meiosis - yeast];ko04111[Cell cycle - yeast];ko04110[Cell cycle]	.	C2_09020W_A	CDC47
2h	B9J08_002115	proline-tRNA ligase	TIGR00408[proS_fam_I: proline--tRNA ligase];PF09180.6|ProRS-C_1[Prolyl-tRNA synthetase, C-terminal];PF00587.20|tRNA-synt_2b[tRNA synthetase class II core domain (G, H, P, S and T)];PF04073.10|tRNA_edit[Aminoacyl-tRNA editing domain];PF03129.15|HGTP_anticodon[Anticodon binding domain]	EC:6.1.1.15[Proline--tRNA ligase.]	GO:0006433;GO:0005840;GO:0005524;GO:0002161;GO:0051276;GO:0006450;EC:6.1.1.15;GO:0005829;GO:0004827	.	.	C7_03660C_A	.
2h	B9J08_003017	hypothetical protein	PF02133.10|Transp_cyt_pur[Permease for cytosine/purines, uracil, thiamine, allantoin]	.	GO:0055085;GO:0016021;GO:0005215	.	TMH:12	C3_03360W_A	FCY2
2h	B9J08_001916	hypothetical protein	PF03452.9|Anp1[Anp1]	EC:2.4.1.-[Hexosyltransferases.]	GO:0097502;GO:0000032;GO:0036180;GO:0005783;GO:0035690;GO:0031505;GO:0034605;GO:0005801;GO:0000136;GO:0000009;GO:0006487;GO:0070317;GO:0036168	.	TMH:1	C3_06020W_A	MNN9
2h	B9J08_001385	hypothetical protein	PF00226.26|DnaJ[DnaJ domain]	.	GO:0005840;GO:0000054;GO:0006450;GO:0006364;GO:0005730;GO:0006452;GO:0005829;GO:0005739;GO:0005844	.	.	C4_02870C_A	ZUO1
2h	B9J08_002497	cyclin-dependent kinase 1	PF00069.20|Pkinase[Protein kinase domain];PF07714.12|Pkinase_Tyr[Protein tyrosine kinase]	EC:2.7.11.22[Cyclin-dependent kinase.]	GO:0005783;GO:0045875;GO:0006338;GO:0070816;GO:0000706;GO:0010569;GO:0004693;GO:0045892;GO:0045930;GO:0051446;GO:0018105;GO:0045944;GO:0032880;GO:0000082;GO:0005840;GO:0042393;GO:0010898;GO:0005524;GO:0005816;GO:0006370;GO:0000993;GO:0016192;GO:0010696;GO:0000307;GO:0005634;GO:0030448;GO:0045931;GO:0005935;GO:0007130;GO:2001033;GO:0051447;GO:0010571;GO:0010568;GO:0000235;GO:0051301;EC:2.7.11.22;G…	ko04113[Meiosis - yeast]	.	CR_06050W_A	CDC28
2h	B9J08_003571	hypothetical protein	PF00026.18|Asp[Eukaryotic aspartyl protease]	.	EC:3.4.23;GO:0006508;GO:0004190	.	.	.	.
2h	B9J08_000192	DNA-directed RNA polymerase I subunit RPA2	PF04567.12|RNA_pol_Rpb2_5[RNA polymerase Rpb2, domain 5];PF04563.10|RNA_pol_Rpb2_1[RNA polymerase beta subunit];PF06883.7|RNA_pol_Rpa2_4[RNA polymerase I, Rpa2 specific domain];PF04565.11|RNA_pol_Rpb2_3[RNA polymerase Rpb2, domain 3];PF00562.23|RNA_pol_Rpb2_6[RNA polymerase Rpb2, domain 6];PF04560.15|RNA_pol_Rpb2_7[RNA polymerase Rpb2, domain 7];PF04561.9|RNA_pol_Rpb2_2[RNA polymerase Rpb2, domai…	EC:2.7.7.6[DNA-directed RNA polymerase.]	GO:0032549;GO:0003677;GO:0042790;GO:0001054;GO:0005736	ko00240[Pyrimidine metabolism];ko03020[RNA polymerase]	.	C7_00570W_A	RPA135
2h	B9J08_001474	hypothetical protein	PF01896.14|DNA_primase_S[Eukaryotic and archaeal DNA primase small subunit];TIGR00335[primase_sml: putative DNA primase, eukaryotic-type, small subunit]	EC:2.7.7.-[Nucleotidyltransferases.]	GO:0006269;GO:0003896;GO:0005658;GO:1990077	ko03030[DNA replication];ko00240[Pyrimidine metabolism]	.	C5_05350W_A	.
2h	B9J08_001046	ribosomal protein L13	TIGR01066[rplM_bact: ribosomal protein L13];PF00572.13|Ribosomal_L13[Ribosomal protein L13]	.	GO:0005762;GO:0006412;GO:0003735	.	.	C1_01580W_A	.
2h	B9J08_000203	40S ribosomal protein S9-A	PF01479.20|S4[S4 domain];PF00163.14|Ribosomal_S4[Ribosomal protein S4/S9 N-terminal domain];TIGR01018[rpsD_arch: ribosomal protein S4]	.	GO:0006412;GO:0003735;GO:0015935;GO:0019843	.	.	C2_03820C_A	RPS9B
2h	B9J08_004225	adenylosuccinate synthetase	PF00709.16|Adenylsucc_synt[Adenylosuccinate synthetase];TIGR00184[purA: adenylosuccinate synthase]	EC:6.3.4.4[Adenylosuccinate synthase.]	GO:0003688;GO:0000287;GO:0044208;EC:6.3.4.4;GO:0005525;GO:0004019;GO:0005737	ko00250[Alanine, aspartate and glutamate metabolism]	.	C1_09640W_A	ADE12
2h	B9J08_005251	ribosomal RNA small subunit methyltransferase NEP1	PF03587.9|EMG1[EMG1/NEP1 methyltransferase]	.	GO:0030686;GO:0000472;GO:0008168;GO:0000447;GO:0042803;GO:0000480;GO:0005730;GO:0005880;GO:0032040;GO:0005829;GO:0070475;GO:0019843	.	.	C1_11380W_A	NEP1
2h	B9J08_001568	hypothetical protein	PF05047.11|L51_S25_CI-B8[Mitochondrial ribosomal protein L51 / S25 / CI-B8 domain]	.	GO:0005762;GO:0003735;GO:0009060	.	.	C1_11880W_A	.
2h	B9J08_005015	hypothetical protein	PF04427.13|Brix[Brix domain]	.	GO:0005634;GO:0035690;GO:0005829;GO:0042273	.	.	C2_05230C_A	RPF2
2h	B9J08_001878	lysine-tRNA ligase%2C cytoplasmic	TIGR00499[lysS_bact: lysine--tRNA ligase];PF00152.15|tRNA-synt_2[tRNA synthetases class II (D, K and N)];PF01336.20|tRNA_anti-codon[OB-fold nucleic acid binding domain]	EC:6.1.1.6[Lysine--tRNA ligase.]	GO:0006430;GO:0005524;EC:6.1.1.6;GO:0004824;GO:0005737;GO:0003676	.	.	C3_07410C_A	KRS1
2h	B9J08_003238	elongation factor Tu%2C mitochondrial	PF01926.18|MMR_HSR1[50S ribosome-binding GTPase];TIGR00485[EF-Tu: translation elongation factor Tu];PF03143.12|GTP_EFTU_D3[Elongation factor Tu C-terminal domain];PF00009.22|GTP_EFTU[Elongation factor Tu GTP binding domain];PF03144.20|GTP_EFTU_D2[Elongation factor Tu domain 2]	.	GO:0003746;GO:0005525;GO:0005739;GO:0070125;GO:0003924	.	.	C1_00590W_A	TUF1
2h	B9J08_004843	hypothetical protein	PF01398.16|JAB[JAB1/Mov34/MPN/PAD-1 ubiquitin protease]	.	.	.	.	C5_02660C_A	.
2h	B9J08_001606	phosphoribosylamine-glycine ligase	PF02769.17|AIRS_C[AIR synthase related protein, C-terminal domain];PF02844.10|GARS_N[Phosphoribosylglycinamide synthetase, N domain];PF13535.1|ATP-grasp_4[ATP-grasp domain];PF01071.14|GARS_A[Phosphoribosylglycinamide synthetase, ATP-grasp (A) domain];TIGR00878[purM: phosphoribosylformylglycinamidine cyclo-ligase];PF00586.19|AIRS[AIR synthase related protein, N-terminal domain];TIGR00877[purD: pho…	EC:6.3.4.13[Phosphoribosylamine--glycine ligase.];EC:6.3.3.1[Phosphoribosylformylglycinamidine cyclo-ligase.]	GO:0005524;GO:0009113;EC:6.3.4.13;GO:0006189;GO:0005737;GO:0046872;GO:0004641;GO:0004637;EC:6.3.3.1	.	.	C1_07890C_A	ADE5,7
2h	B9J08_003104	translation factor GUF1%2C mitochondrial	PF00679.19|EFG_C[Elongation factor G C-terminus];PF00009.22|GTP_EFTU[Elongation factor Tu GTP binding domain];PF03144.20|GTP_EFTU_D2[Elongation factor Tu domain 2];PF06421.7|LepA_C[GTP-binding protein LepA C-terminus];TIGR01393[lepA: GTP-binding protein LepA]	.	GO:0043022;GO:0045727;GO:0003924;GO:0005761;GO:0005743;GO:0016021;GO:0006412;GO:0005525	.	.	C2_06200C_A	.
2h	B9J08_000975	phenylalanine-tRNA ligase%2C alpha subunit	TIGR00468[pheS: phenylalanine--tRNA ligase, alpha subunit];PF00587.20|tRNA-synt_2b[tRNA synthetase class II core domain (G, H, P, S and T)];PF01409.15|tRNA-synt_2d[tRNA synthetases class II core domain (F)]	EC:6.1.1.20[Phenylalanine--tRNA ligase.]	GO:0006432;GO:0004826;GO:0005524;GO:0005829;GO:0000049;GO:0009328;EC:6.1.1.20	.	.	C1_02710W_A	FRS2
2h	B9J08_001667	hypothetical protein	PF04042.11|DNA_pol_E_B[DNA polymerase alpha/epsilon subunit B]	EC:2.7.7.7[DNA-directed DNA polymerase.]	GO:0008622;GO:0003690;GO:0000790;GO:0003887;GO:0042276;GO:0045005;GO:0005829;GO:1902975;EC:2.7.7.7	ko03030[DNA replication];ko03410[Base excision repair];ko00240[Pyrimidine metabolism];ko03420[Nucleotide excision repair]	.	CR_09900C_A	DPB2
2h	B9J08_005488	UPF0202 protein KRE33	PF13718.1|GNAT_acetyltr_2[GNAT acetyltransferase 2];PF05127.9|Helicase_RecD[Helicase];PF08351.6|DUF1726[Domain of unknown function (DUF1726)];PF13725.1|tRNA_bind_2[Possible tRNA binding domain]	EC:2.3.1.-[Transferring groups other than amino-acyl groups.]	GO:0030686;GO:0005730;GO:0070317;GO:0042274;GO:0008080	.	.	CR_04240C_A	.
2h	B9J08_005247	ATP phosphoribosyltransferase	PF01634.13|HisG[ATP phosphoribosyltransferase];PF08029.6|HisG_C[HisG, C-terminal domain];TIGR03455[HisG_C-term: ATP phosphoribosyltransferase, C-terminal domain];TIGR00070[hisG: ATP phosphoribosyltransferase];PF09084.6|NMT1[NMT1/THI5 like]	EC:2.4.2.17[ATP phosphoribosyltransferase.]	GO:0000287;GO:0005524;EC:2.4.2.17;GO:0000105;GO:0003879;GO:0005829	.	.	C5_05320C_A	HIS1
2h	B9J08_002211	hypothetical protein	PF04000.10|Sas10_Utp3[Sas10/Utp3/C1D family];PF09368.5|Sas10[Sas10 C-terminal domain]	.	GO:0000472;GO:0032040;GO:0005730;GO:0000447;GO:0000480	.	.	C4_02790C_A	SAS10
2h	B9J08_000075	inosine-5'-monophosphate dehydrogenase	PF01070.13|FMN_dh[FMN-dependent dehydrogenase];PF00571.23|CBS[CBS domain];PF00478.20|IMPDH[IMP dehydrogenase / GMP reductase domain];TIGR01302[IMP_dehydrog: inosine-5'-monophosphate dehydrogenase];PF03060.10|NMO[Nitronate monooxygenase]	EC:1.1.1.205[IMP dehydrogenase.]	GO:0036180;GO:0036170;GO:0035690;GO:0009267;GO:0055114;EC:1.1.1.205;GO:0044416;GO:0046872;GO:0005829;GO:0000166;GO:0006177;GO:0003938	ko00983[Drug metabolism - other enzymes]	.	C2_06390C_A	IMH3
2h	B9J08_004324	hypothetical protein	PF00324.16|AA_permease[Amino acid permease];PF13520.1|AA_permease_2[Amino acid permease]	.	GO:0003333;GO:0016021;GO:0015171	TMH:11	.	C1_06000W_A	.
2h	B9J08_002991	hypothetical protein	PF06172.6|Cupin_5[Cupin superfamily (DUF985)]	.	.	.	.	.	.
2h	B9J08_005249	hypothetical protein	PF00069.20|Pkinase[Protein kinase domain];PF07714.12|Pkinase_Tyr[Protein tyrosine kinase]	.	GO:0001558;GO:0035690;GO:0005524;GO:0006468;GO:0005935;GO:0004672;GO:0044182;GO:0000131;GO:0005940;GO:0000921	.	.	C1_11400C_A	GIN4
2h	B9J08_004238	ribosomal protein S2	PF00318.15|Ribosomal_S2[Ribosomal protein S2];TIGR01011[rpsB_bact: ribosomal protein S2]	.	GO:0006412;GO:0005763;GO:0003735	.	.	C6_03730C_A	.
2h	B9J08_003953	60S ribosomal protein L19-B	PF01280.15|Ribosomal_L19e[Ribosomal protein L19e]	.	GO:0006412;GO:0022625;GO:0003735	.	.	C3_04500C_A	RPL19A
2h	B9J08_005336	60S ribosomal protein L12-A	PF00298.14|Ribosomal_L11[Ribosomal protein L11, RNA binding domain];PF03946.9|Ribosomal_L11_N[Ribosomal protein L11, N-terminal domain]	.	GO:0005730;GO:0006412;GO:0000027;GO:0022625;GO:0003735;GO:0030687;GO:0019843	.	.	C3_02110W_A	RPL12
2h	B9J08_001653	protein transporter SEC23	PF08033.7|Sec23_BS[Sec23/Sec24 beta-sandwich domain];PF04811.10|Sec23_trunk[Sec23/Sec24 trunk domain];PF00626.17|Gelsolin[Gelsolin repeat];PF04810.10|zf-Sec23_Sec24[Sec23/Sec24 zinc finger];PF04815.10|Sec23_helical[Sec23/Sec24 helical domain]	.	GO:0043547;GO:0003400;GO:0000139;GO:0006886;GO:0030127;GO:0008270;GO:0005789;GO:0006888;GO:0005096	.	.	C4_05690W_A	SEC23
2h	B9J08_002947	hypothetical protein	PF11709.3|Mit_ribos_Mrp51[Mitochondrial ribosomal protein subunit]	.	GO:0005763;GO:0070124;GO:0003735	.	.	C2_04790C_A	.
2h	B9J08_000312	hypothetical protein	PF00588.14|SpoU_methylase[SpoU rRNA Methylase family]	EC:2.1.1.34[tRNA (guanosine(18)-2'-O)-methyltransferase.]	GO:0006396;GO:0003723;GO:0001510;GO:0008173	.	.	C4_03830W_A	.
2h	B9J08_001420	hypothetical protein	.	.	GO:0003723;GO:0042175;GO:0005783;GO:0008298;GO:0005829;GO:0016071;GO:0007088;GO:0005844	.	.	C4_02270C_A	BFR1
2h	B9J08_002720	hypothetical protein	PF08657.5|DASH_Spc34[DASH complex subunit Spc34]	.	GO:0042729;GO:0016021;GO:0008608;GO:0005876	.	.	.	.
2h	B9J08_000013	dihydroxy-acid dehydratase%2C mitochondrial	PF00920.16|ILVD_EDD[Dehydratase family];TIGR00110[ilvD: dihydroxy-acid dehydratase]	EC:4.2.1.9[Dihydroxy-acid dehydratase.]	GO:0004160;EC:4.2.1.9;GO:0009082	ko00770[Pantothenate and CoA biosynthesis]	.	C5_05410C_A	ILV3
2h	B9J08_003002	hypothetical protein	PF03239.9|FTR1[Iron permease FTR1 family]	.	GO:0010106;GO:0044117;GO:0033573;GO:0009986;GO:0015093;GO:0009405;GO:1903874	.	TMH:7	C1_14130W_A	FTR1
2h	B9J08_002714	hypothetical protein	PF05383.12|La[La domain]	.	GO:0005829	.	.	C7_03270W_B	.
2h	B9J08_001096	hypothetical protein	.	.	GO:0006355;GO:0043565;GO:0008270;GO:0003700	.	.	C5_02780W_A	.
2h	B9J08_002813	elongation factor 3	PF00005.22|ABC_tran[ABC transporter]	.	GO:0005524;GO:0003746;EC:3.6.1.3;GO:0006414;GO:0005737;GO:0016887	.	.	C5_01580C_A	CEF3
2h	B9J08_004504	hypothetical protein	PF00385.19|Chromo[Chromo (CHRromatin Organisation MOdifier) domain];PF00005.22|ABC_tran[ABC transporter];PF13304.1|AAA_21[AAA domain]	.	GO:0005634;GO:0005524;GO:0003746;EC:3.6.1.3;GO:0006414;GO:0016973;GO:0005829;GO:0005886;GO:0016887	.	.	CR_09370W_A	ELF1
2h	B9J08_003930	hypothetical protein	PF10501.4|Ribosomal_L50[Ribosomal subunit 39S]	.	GO:0005739	.	.	C1_12280C_A	.
2h	B9J08_001573	H/ACA ribonucleoprotein complex subunit 1	PF04410.9|Gar1[Gar1/Naf1 RNA binding region]	.	GO:0035690;GO:0034513;GO:0006364;GO:0031429;GO:0031120;GO:0019013;GO:0009982;EC:5.4.99.12	.	.	C1_11550W_A	GAR1
2h	B9J08_005365	ribosomal RNA small subunit methyltransferase B	PF01189.12|Nol1_Nop2_Fmu[NOL1/NOP2/sun family]	EC:2.1.1.-[Methyltransferases.]	GO:0003723;GO:0005634;GO:1902626;GO:0009383;GO:0000463;GO:0030687;GO:0070475	.	.	CR_04170W_A	.
2h	B9J08_000243	hypothetical protein	PF01105.19|EMP24_GP25L[emp24/gp25L/p24 family/GOLD]	.	GO:0006810;GO:0005794;GO:0016021;GO:0005789	.	.	C1_10940C_A	ERP5
2h	B9J08_004739	septum formation protein Maf	TIGR00172[maf: septum formation protein Maf];PF02545.9|Maf[Maf-like protein]	.	GO:0005737	.	.	C7_00680W_A	.
2h	B9J08_000346	60S ribosomal protein L28	PF00828.14|Ribosomal_L18e[Ribosomal protein L18e/L15]	.	GO:0003723;GO:0005634;GO:0015934;GO:0006412;GO:0003735	.	.	CR_03030C_A	RPL28
2h	B9J08_005373	ATP-dependent RNA helicase DBP9	PF04851.10|ResIII[Type III restriction enzyme, res subunit];PF00271.26|Helicase_C[Helicase conserved C-terminal domain];PF00270.24|DEAD[DEAD/DEAH box helicase]	EC:3.6.4.13[RNA helicase.]	GO:0003723;GO:0033680;GO:0005524;GO:0004004;GO:0005730;GO:0000027;GO:0000463;GO:0032508;GO:0004003	.	.	C6_01890C_A	.
2h	B9J08_003708	glycine-tRNA ligase 1%2C mitochondrial	TIGR00389[glyS_dimeric: glycine--tRNA ligase];PF00587.20|tRNA-synt_2b[tRNA synthetase class II core domain (G, H, P, S and T)];PF03129.15|HGTP_anticodon[Anticodon binding domain]	EC:6.1.1.14[Glycine--tRNA ligase.]	EC:6.1.1.14;GO:0004820;GO:0005524;GO:0006426;GO:0005737	.	.	C1_05290W_A	GRS1
2h	B9J08_004382	hypothetical protein	.	.	GO:0031224;GO:0009277;GO:0009986;GO:0005829;GO:0035556;GO:0005886	.	.	C5_02460C_A	ECM331
2h	B9J08_002772	elongation factor 2	PF01926.18|MMR_HSR1[50S ribosome-binding GTPase];PF00679.19|EFG_C[Elongation factor G C-terminus];PF14492.1|EFG_II[Elongation Factor G, domain II];PF00009.22|GTP_EFTU[Elongation factor Tu GTP binding domain];PF03144.20|GTP_EFTU_D2[Elongation factor Tu domain 2];PF03764.13|EFG_IV[Elongation factor G, domain IV]	.	GO:0035690;GO:0003746;GO:0006414;GO:0005737;GO:0003924;GO:0009986;GO:0030445;GO:0008144;GO:0005525;GO:0005886	.	.	C2_03100W_A	EFT2
2h	B9J08_001248	hypothetical protein	PF04824.11|Rad21_Rec8[Conserved region of Rad21 / Rec8 like protein];PF04825.8|Rad21_Rec8_N[N terminus of Rad21 / Rec8 like protein]	.	GO:1990414;GO:0006268;GO:0006473;GO:0007076;GO:0006915;GO:1902377;GO:1990707;GO:0034990;GO:0071687;GO:0003682;GO:0034087;GO:0005739;GO:0034507	ko04111[Cell cycle - yeast]	.	CR_10540C_A	MCD1
2h	B9J08_004699	40S ribosomal protein S25-B	PF03297.10|Ribosomal_S25[S25 ribosomal protein]	.	GO:0005840	.	.	C5_03540C_A	RPS25B
2h	B9J08_001049	arginine-tRNA ligase%2C cytoplasmic	PF05746.10|DALR_1[DALR anticodon binding domain];PF00750.14|tRNA-synt_1d[tRNA synthetases class I (R)];TIGR00456[argS: arginine--tRNA ligase];PF03485.11|Arg_tRNA_synt_N[Arginyl tRNA synthetase N terminal domain]	EC:6.1.1.19[Arginine--tRNA ligase.]	EC:6.1.1.19;GO:0004814;GO:0005524;GO:0005739;GO:0006420	.	.	C1_01530C_A	.
2h	B9J08_003646	aspartate-semialdehyde dehydrogenase	TIGR00978[asd_EA: aspartate-semialdehyde dehydrogenase];PF02774.13|Semialdhyde_dhC[Semialdehyde dehydrogenase, dimerisation domain];PF01118.19|Semialdhyde_dh[Semialdehyde dehydrogenase, NAD binding domain]	EC:1.2.1.11[Aspartate-semialdehyde dehydrogenase.]	EC:1.2.1.11;GO:0055114;GO:0046983;EC:1.2.1.38;GO:0005829;GO:0009086;GO:0004073;GO:0005634;GO:0006531;GO:0051287;GO:0009088;GO:0009097;GO:0050661;GO:0003942;GO:0009089;GO:0009090	ko00270[Cysteine and methionine metabolism];ko00300[Lysine biosynthesis]	.	C2_02370C_A	HOM2
2h	B9J08_005385	hypothetical protein	PF14259.1|RRM_6[RNA recognition motif (a.k.a. RRM, RBD, or RNP domain)];PF00076.17|RRM_1[RNA recognition motif. (a.k.a. RRM, RBD, or RNP domain)]	.	GO:0034057;GO:0000166;GO:0005829;GO:0097010;GO:0033592;GO:0043024;GO:0001731	ko04150[mTOR signaling pathway]	.	C6_01630W_A	TIF3
2h	B9J08_001822	ribosomal protein S12	TIGR00981[rpsL_bact: ribosomal protein S12];PF00164.20|Ribosom_S12_S23[Ribosomal protein S12/S23]	.	GO:0006412;GO:0003735;GO:0005739;GO:0015935	.	.	C1_06070W_A	.
2h	B9J08_001975	phosphoribosylformylglycinamidine synthase	PF13507.1|GATase_5[CobB/CobQ-like glutamine amidotransferase domain];PF02769.17|AIRS_C[AIR synthase related protein, C-terminal domain];TIGR01735[FGAM_synt: phosphoribosylformylglycinamidine synthase];PF00586.19|AIRS[AIR synthase related protein, N-terminal domain]	EC:6.3.5.3[Phosphoribosylformylglycinamidine synthase.]	GO:0004642;GO:0005794;EC:6.3.5.3;GO:0006189	.	.	CR_04740C_A	ADE6
2h	B9J08_004970	hypothetical protein	PF00225.18|Kinesin[Kinesin motor domain]	.	GO:0000132;GO:0005524;GO:0005881;GO:0030473;EC:3.6.4.4;GO:0070463;GO:0005880;GO:0070462;GO:0032888;GO:0031115;GO:0008574;GO:0030472;GO:0008152;GO:0051228;GO:0008017;GO:0090307	.	.	C3_05720C_A	KIP3
2h	B9J08_001745	hypothetical protein	PF00271.26|Helicase_C[Helicase conserved C-terminal domain];PF00270.24|DEAD[DEAD/DEAH box helicase]	.	GO:0006406;GO:0003723;GO:0031965;GO:0005524;GO:0006415;GO:0003724;GO:0005934;GO:0005737;GO:0008186;GO:0008026;GO:0000822;GO:0044614;GO:0005844	.	.	C3_01860C_A	DBP5
2h	B9J08_003791	serine hydroxymethyltransferase%2C mitochondrial	PF00464.14|SHMT[Serine hydroxymethyltransferase]	EC:2.1.2.1[Glycine hydroxymethyltransferase.]	GO:0008168;GO:0006563;GO:0004372;EC:2.1.2.1;GO:0006544;GO:0035999;GO:0005739;GO:0030170;GO:0009070;GO:0032259	ko00670[One carbon pool by folate];ko00460[Cyanoamino acid metabolism];ko00680[Methane metabolism]	.	C7_03330C_A	SHM1
2h	B9J08_000217	ribosomal protein L27	PF01016.14|Ribosomal_L27[Ribosomal L27 protein];TIGR00062[L27: ribosomal protein L27]	.	GO:0005762;GO:0006412;GO:0003735	.	.	C7_03790W_A	MRP7
2h	B9J08_001358	centromere/microtubule-binding protein CBF5	PF08068.7|DKCLD[DKCLD (NUC011) domain];TIGR00425[CBF5: putative rRNA pseudouridine synthase];PF01472.15|PUA[PUA domain];PF01509.13|TruB_N[TruB family pseudouridylate synthase (N terminal domain)]	EC:5.4.99.-[Transferring other groups.]	GO:0003723;GO:0003677;GO:0004114;GO:0005874;EC:3.1.4.17;GO:0031429;GO:0000495;GO:0005829;GO:0009982;GO:0030686;GO:0007165;GO:0000775;GO:1990481;GO:0004730;GO:0031120;GO:0031118;EC:5.4.99.12;GO:0019013;EC:4.2.1.70	.	.	C1_10620W_A	.
2h	B9J08_000774	polyadenylate-binding protein%2C cytoplasmic and nuclear	PF14259.1|RRM_6[RNA recognition motif (a.k.a. RRM, RBD, or RNP domain)];PF00658.13|PABP[Poly-adenylate binding protein, unique domain];PF13893.1|RRM_5[RNA recognition motif. (a.k.a. RRM, RBD, or RNP domain)];PF00076.17|RRM_1[RNA recognition motif. (a.k.a. RRM, RBD, or RNP domain)]	.	GO:0006406;GO:0006397;GO:0008143;GO:0010494;GO:0005840;GO:0005634;GO:0060211;GO:0006446;GO:0005829;GO:0000166;GO:0043086;GO:0008428	ko03018[RNA degradation];ko03015[mRNA surveillance pathway]	.	C1_03370W_A	.
2h	B9J08_002231	pyruvate decarboxylase	PF02776.13|TPP_enzyme_N[Thiamine pyrophosphate enzyme, N-terminal TPP binding domain];PF02775.16|TPP_enzyme_C[Thiamine pyrophosphate enzyme, C-terminal TPP binding domain];PF00205.17|TPP_enzyme_M[Thiamine pyrophosphate enzyme, central domain]	EC:4.1.1.1[Pyruvate decarboxylase.]	GO:0004737;GO:0000287;GO:0009986;GO:0030976;EC:4.1.1.1	.	.	C4_06570C_A	PDC11
2h	B9J08_003603	hypothetical protein	PF08659.5|KR[KR domain];PF00106.20|adh_short[short chain dehydrogenase]	.	GO:0005783;GO:0005635;GO:0016021	.	TMH:1	C1_06770W_A	.
2h	B9J08_004745	hypothetical protein	PF08449.6|UAA[UAA transporter family];PF00892.15|EamA[EamA-like transporter family]	.	GO:0005459;GO:0005783;GO:0016021;GO:0072334;GO:0015786	.	TMH:8	C3_06980W_A	HUT1
2h	B9J08_005106	hypothetical protein	PF03715.8|Noc2[Noc2p family]	.	GO:0036180;GO:0036170;GO:0035690;GO:0009267;GO:0005730;GO:0030691;GO:0030690;GO:0005739;GO:0042273	.	.	CR_05520W_A	NOC2
2h	B9J08_001913	hypothetical protein	PF07961.6|MBA1[MBA1-like protein]	.	GO:0071840	.	.	C3_06050C_A	.
2h	B9J08_000257	hypothetical protein	PF08640.6|U3_assoc_6[U3 small nucleolar RNA-associated protein 6]	.	GO:0030515;GO:0034388;GO:0000472;GO:0044732;GO:0000447;GO:0032153;GO:0000480;GO:0032040;GO:0005829	.	.	C1_10880W_A	.
2h	B9J08_004927	hypothetical protein	PF01459.17|Porin_3[Eukaryotic porin]	.	GO:0055085;GO:0005742;GO:0005886	.	.	C7_01970C_A	TOM40
2h	B9J08_001267	hypothetical protein	PF01066.16|CDP-OH_P_transf[CDP-alcohol phosphatidyltransferase]	EC:2.7.8.-[Transferases for other substituted phosphate groups.]	GO:0032049;EC:2.7.8.5;GO:0007006;GO:0008444;GO:0006873;GO:0008808;GO:0016021;GO:0005739	.	TMH:4	C1_00100C_A	.
2h	B9J08_001744	hypothetical protein	.	EC:1.15.1.1[Superoxide dismutase.]	GO:0006801;GO:0005739;GO:0016491	ko05016[Huntington's disease]	.	C3_01850W_A	.
2h	B9J08_000290	hypothetical protein	PF00069.20|Pkinase[Protein kinase domain];PF07714.12|Pkinase_Tyr[Protein tyrosine kinase]	.	GO:0005524;GO:0044257;GO:0005935;GO:0046777;GO:0004672;GO:0005940;GO:0000086;GO:0051726	.	.	C1_11400C_A	GIN4
2h	B9J08_003109	hypothetical protein	.	.	.	.	.	.	.
2h	B9J08_004502	hypothetical protein	PF04615.8|Utp14[Utp14 protein]	.	GO:0000472;GO:0032040;GO:0005730;GO:0000447;GO:0000480	.	.	CR_09800C_A	.
2h	B9J08_005084	hypothetical protein	PF13513.1|HEAT_EZ[HEAT-like repeat];PF03810.14|IBN_N[Importin-beta N-terminal domain]	.	GO:0005634;GO:0006607;GO:0008565;GO:0036092;GO:0005737;GO:0008139;GO:0006886;GO:0008536;GO:0016303;GO:0006610;EC:2.7.1.137;GO:2000220	.	.	C1_05630C_A	.
2h	B9J08_003155	hypothetical protein	PF04042.11|DNA_pol_E_B[DNA polymerase alpha/epsilon subunit B];PF08418.5|Pol_alpha_B_N[DNA polymerase alpha subunit B N-terminal]	.	GO:0003887;GO:0003677;GO:0005634;GO:0071897;GO:0006260;EC:2.7.7.7	ko03030[DNA replication];ko00240[Pyrimidine metabolism]	.	C1_07490C_A	.
2h	B9J08_003223	hypothetical protein	.	.	.	.	.	C4_05580C_A	.
2h	B9J08_001366	hypothetical protein	PF13928.1|Flocculin_t3[Flocculin type 3 repeat]	.	.	.	.	.	.
2h	B9J08_005012	hypothetical protein	PF12298.3|Bot1p[Eukaryotic mitochondrial regulator protein]	.	GO:0043229;GO:0016020;GO:0044444	.	.	C2_05300C_A	.
2h	B9J08_003395	hypothetical protein	.	.	GO:0032968;GO:0030015	.	.	C1_06910C_A	.
2h	B9J08_003967	hypothetical protein	PF13716.1|CRAL_TRIO_2[Divergent CRAL/TRIO domain]	.	GO:0007165;GO:0031505;GO:0030447	.	.	C1_13310W_A	ECM25
2h	B9J08_004959	hypothetical protein	PF00254.23|FKBP_C[FKBP-type peptidyl-prolyl cis-trans isomerase]	EC:5.2.1.8[Peptidylprolyl isomerase.]	GO:0006457;GO:0003755;GO:0005730;EC:5.2.1.8;GO:0000412;GO:0005528	.	.	C1_03790C_A	.
2h	B9J08_002000	nucleolar protein 9	PF00806.14|PUF[Pumilio-family RNA binding repeat]	.	GO:0003723;GO:0030686;GO:0000472;GO:0005730;GO:0000056;GO:0030688;GO:0000447;GO:0000480	.	.	C1_04040C_A	.
2h	B9J08_004130	hypothetical protein	PF04003.7|Utp12[Dip2/Utp12 Family]	.	.	.	.	.	.
2h	B9J08_003216	hypothetical protein	PF10637.4|Ofd1_CTDD[Oxoglutarate and iron-dependent oxygenase degradation C-term];PF03171.15|2OG-FeII_Oxy[2OG-Fe(II) oxygenase superfamily];PF13640.1|2OG-FeII_Oxy_3[2OG-Fe(II) oxygenase superfamily]	.	GO:0008143;GO:0006415;GO:0005506;GO:0000288;GO:0055114;GO:0031418;GO:0031543;GO:0006449;GO:0016740;GO:0018188	.	.	C4_05460C_A	OFD1
2h	B9J08_001607	hypothetical protein	.	.	GO:0006396;GO:0003723;EC:3.1.26.3;GO:0004525;GO:0005762;GO:0090502;GO:0003735	.	.	C1_07910C_A	MRPL3
2h	B9J08_002675	hypothetical protein	PF13401.1|AAA_22[AAA domain];PF13604.1|AAA_30[AAA domain];PF02689.9|Herpes_Helicase[Helicase];PF05970.9|PIF1[PIF1-like helicase];PF09848.4|DUF2075[Uncharacterized conserved protein (DUF2075)]	EC:3.6.4.12[DNA helicase.]	GO:0005634;GO:0006281;GO:0005524;GO:0097046;GO:0051974;GO:0032508;GO:0010521;GO:0044806;GO:0043141;GO:0000002;GO:0005739;GO:0051880;GO:0032211;GO:0006310;GO:0000723;GO:0044427	.	.	CR_00060C_A	.
2h	B9J08_005031	hypothetical protein	PF04003.7|Utp12[Dip2/Utp12 Family]	.	GO:0000462;GO:0033553;GO:0032040;GO:0045943;GO:0044451;GO:0034455	.	.	CR_10240W_A	UTP5
2h	B9J08_004689	H/ACA ribonucleoprotein complex subunit 2	PF01248.21|Ribosomal_L7Ae[Ribosomal protein L7Ae/L30e/S12e/Gadd45 family]	.	GO:0031120;GO:0005840;GO:0000469;GO:0031118;GO:0034513;GO:0019013;GO:0031429	.	.	CR_04360C_A	NHP2
2h	B9J08_001708	hypothetical protein	PF00687.16|Ribosomal_L1[Ribosomal protein L1p/L10e family]	.	GO:0015934;GO:0005739	.	.	C5_00030W_A	.
2h	B9J08_002638	deoxyhypusine synthase	TIGR00321[dhys: deoxyhypusine synthase];PF01916.12|DS[Deoxyhypusine synthase]	EC:2.5.1.46[Deoxyhypusine synthase.]	GO:0005634;GO:0005829;GO:0008612;GO:0034038;EC:2.5.1.46	.	.	C3_02180C_A	.
2h	B9J08_003154	hypothetical protein	PF05383.12|La[La domain]	.	GO:0005654;GO:0005730;GO:0000166;GO:0030529;GO:0000049;GO:0008033	.	.	C1_07500C_A	LHP1
2h	B9J08_003376	hypothetical protein	PF00069.20|Pkinase[Protein kinase domain];PF07714.12|Pkinase_Tyr[Protein tyrosine kinase]	EC:2.7.11.22[Cyclin-dependent kinase.]	GO:0036171;GO:0005524;GO:0032878;GO:0043433;GO:0000122;GO:0000307;GO:0004713;GO:0004693;GO:0000083;GO:0005829;GO:0006974;GO:0050849;GO:0042764;GO:0005634;GO:0007089;GO:0006468;GO:0016239;GO:0045719;GO:0031647;GO:0032880;EC:2.7.11.22;EC:2.7.10;GO:0070887;GO:0045936;GO:0016242	.	.	C1_04520C_A	PHO85
2h	B9J08_000009	hypothetical protein	PF13641.1|Glyco_tranf_2_3[Glycosyltransferase like family 2];PF13506.1|Glyco_transf_21[Glycosyl transferase family 21]	EC:2.4.1.80[Ceramide glucosyltransferase.]	GO:0006679;EC:2.4.1.80;GO:0030447;GO:0016021;GO:0009405;GO:0008120	.	TMH:1	C4_02010C_A	HSX11
2h	B9J08_000380	hypothetical protein	.	.	.	.	.	CR_01600C_A	.
2h	B9J08_001014	hypothetical protein	PF02466.14|Tim17[Tim17/Tim22/Tim23/Pmp24 family]	.	GO:0030943;GO:0008320;GO:0016021;GO:0005737;GO:0030150	.	.	C2_09900C_A	TIM23
2h	B9J08_003876	hypothetical protein	PF00570.18|HRDC[HRDC domain];PF08066.7|PMC2NT[PMC2NT (NUC016) domain];PF01612.15|DNA_pol_A_exo1[3'-5' exonuclease]	EC:3.1.13.-[Exoribonucleases producing 5'-phosphomonoesters.];EC:3.1.26.3[Ribonuclease III.]	GO:0071046;GO:0000176;GO:0033621;GO:0003676;GO:0016073;GO:0008408;GO:0005730;GO:0000166;GO:0090305;GO:1990251;GO:0043628	.	.	C1_05050C_A	RRP6
2h	B9J08_001434	hypothetical protein	PF00466.15|Ribosomal_L10[Ribosomal protein L10]	.	GO:0005840;GO:0005654;GO:0035690;GO:0000027;GO:0030687;GO:0006364;GO:0005730;GO:0000956	.	.	C6_02770W_A	MRT4
2h	B9J08_003605	ribosomal protein L11	TIGR01632[L11_bact: ribosomal protein L11];PF00298.14|Ribosomal_L11[Ribosomal protein L11, RNA binding domain];PF03946.9|Ribosomal_L11_N[Ribosomal protein L11, N-terminal domain]	.	GO:0005762;GO:0032543;GO:0000027;GO:0003735;GO:0019843	.	.	C1_06790C_A	MRPL19
2h	B9J08_000565	ribosomal protein L17	PF01196.14|Ribosomal_L17[Ribosomal protein L17]	.	GO:0005762;GO:0006412;GO:0000002;GO:0003735	.	.	CR_07390C_A	MRPL8
2h	B9J08_003514	protein MET17	PF00155.16|Aminotran_1_2[Aminotransferase class I and II];PF01041.12|DegT_DnrJ_EryC1[DegT/DnrJ/EryC1/StrS aminotransferase family];PF00266.14|Aminotran_5[Aminotransferase class-V];PF01053.15|Cys_Met_Meta_PP[Cys/Met metabolism PLP-dependent enzyme];PF02347.11|GDC-P[Glycine cleavage system P-protein]	.	GO:0003961;GO:0004124;GO:0071266;GO:0005737;GO:0030446;EC:2.5.1.49;EC:2.5.1.47;GO:0019344;GO:0030170	.	.	C4_00200C_A	MET15
2h	B9J08_001765	leucine-tRNA ligase	TIGR00395[leuS_arch: leucine--tRNA ligase];PF09334.6|tRNA-synt_1g[tRNA synthetases class I (M)];PF01406.14|tRNA-synt_1e[tRNA synthetases class I (C) catalytic domain];PF00133.17|tRNA-synt_1[tRNA synthetases class I (I, L, M and V)];PF08264.8|Anticodon_1[Anticodon-binding domain of tRNA]	EC:6.1.1.4[Leucine--tRNA ligase.]	EC:6.1.1.4;GO:0032006;GO:0004823;GO:0005524;GO:0002161;GO:0006270;GO:0006429;GO:0006450;GO:0005829	ko00970[Aminoacyl-tRNA biosynthesis]	.	CR_01690C_A	CDC60
2h	B9J08_002809	hypothetical protein	PF01245.15|Ribosomal_L19[Ribosomal protein L19]	.	GO:0005762;GO:0006412;GO:0003735	.	.	C5_01050C_A	.
2h	B9J08_001901	hypothetical protein	PF00722.16|Glyco_hydro_16[Glycosyl hydrolases family 16]	.	GO:0070783;GO:0031505;GO:0030428;GO:0016798;GO:0030446;GO:0044406;GO:0009986;GO:0030445;GO:0005576;GO:0005975;GO:0046658;GO:0009405	.	.	C3_01730C_A	UTR2
2h	B9J08_004352	adenosylhomocysteinase	PF02826.14|2-Hacid_dh_C[D-isomer specific 2-hydroxyacid dehydrogenase, NAD binding domain];PF00670.16|AdoHcyase_NAD[S-adenosyl-L-homocysteine hydrolase, NAD binding domain];PF05221.12|AdoHcyase[S-adenosyl-L-homocysteine hydrolase];TIGR00936[ahcY: adenosylhomocysteinase]	EC:3.3.1.1[Adenosylhomocysteinase.]	GO:0004013;GO:0019510;GO:0006641;EC:3.3.1.1;GO:0006730;GO:0006656;GO:0005737	.	.	C5_04270C_A	SAH1
2h	B9J08_003894	eukaryotic translation initiation factor 2 subunit gamma	PF09173.6|eIF2_C[Initiation factor eIF2 gamma, C terminal];PF00009.22|GTP_EFTU[Elongation factor Tu GTP binding domain];PF03144.20|GTP_EFTU_D2[Elongation factor Tu domain 2]	.	GO:0000049;GO:0005850;GO:0031369;GO:0001731;GO:0003924;GO:0016282;GO:0043614;GO:0003743;GO:0016021;GO:0033290;GO:0005525;GO:0045903.	.	.	C5_02170C_A	GCD11

## Sheet: Data7. B8441_GO_enrichment
Supplementary data 7. GO enrichment analysis of genes differentially expressed in untreated B8441 relative to B11210
GOID	GO_term	Corrected P-value
6412	translation	8.59e-66
43043	peptide biosynthetic process	2.81e-65
43604	amide biosynthetic process	6.78e-63
6518	peptide metabolic process	4.4e-62
43603	cellular amide metabolic process	3.86e-59
1901566	organonitrogen compound biosynthetic process	2.14e-51
9058	biosynthetic process	1.85e-48
1901576	organic substance biosynthetic process	5.49e-48
44249	cellular biosynthetic process	1.16e-47
34641	cellular nitrogen compound metabolic process	4.28e-47
34645	cellular macromolecule biosynthetic process	3.55e-46
9059	macromolecule biosynthetic process	7.02e-46
10467	gene expression	1.82e-44
44271	cellular nitrogen compound biosynthetic process	3.74e-44
6807	nitrogen compound metabolic process	2.31e-34
44237	cellular metabolic process	1.3e-33
44238	primary metabolic process	2.37e-33
71704	organic substance metabolic process	5.47e-31
43170	macromolecule metabolic process	1e-30
42254	ribosome biogenesis	1.92e-29
44260	cellular macromolecule metabolic process	2.99e-28
8152	metabolic process	1.19e-27
22613	ribonucleoprotein complex biogenesis	2.67e-26
44267	cellular protein metabolic process	3.89e-26
19538	protein metabolic process	8.02e-24
1901564	organonitrogen compound metabolic process	4.78e-23
9987	cellular process	1.13e-20
6364	rRNA processing	9.62e-18
34660	ncRNA metabolic process	1.51e-17
16072	rRNA metabolic process	2.24e-16
42274	ribosomal small subunit biogenesis	1.25e-14
34470	ncRNA processing	6.09e-14
30490	maturation of SSU-rRNA	1.4e-13
44085	cellular component biogenesis	1.76e-12
462	maturation of SSU-rRNA from tricistronic rRNA transcript (SSU-rRNA, 5.8S rRNA, LSU-rRNA)	6.13e-12
6139	nucleobase-containing compound metabolic process	9.45e-11
90304	nucleic acid metabolic process	2.04e-10
16070	RNA metabolic process	2.37e-10
6725	cellular aromatic compound metabolic process	2.58e-10
1901360	organic cyclic compound metabolic process	4.09e-10
6396	RNA processing	5.02e-10
51029	rRNA transport	6.28e-10
6407	rRNA export from nucleus	6.28e-10
46483	heterocycle metabolic process	1.32e-09
42255	ribosome assembly	8.27e-09
71840	cellular component organization or biogenesis	7.63e-07
71428	rRNA-containing ribonucleoprotein complex export from nucleus	1.06e-06
6403	RNA localization	1.19e-06
97064	ncRNA export from nucleus	1.79e-06
90502	RNA phosphodiester bond hydrolysis, endonucleolytic	3.32e-06
50658	RNA transport	3.43e-06
51236	establishment of RNA localization	3.43e-06
50657	nucleic acid transport	4.05e-06
469	cleavage involved in rRNA processing	5.95e-06
71166	ribonucleoprotein complex localization	6.24e-06
71426	ribonucleoprotein complex export from nucleus	6.24e-06
90501	RNA phosphodiester bond hydrolysis	6.59e-06
6405	RNA export from nucleus	7.39e-06
6611	protein export from nucleus	7.39e-06
2181	cytoplasmic translation	8.07e-06
51168	nuclear export	8.75e-06
478	endonucleolytic cleavage involved in rRNA processing	1.78e-05
479	endonucleolytic cleavage of tricistronic rRNA transcript (SSU-rRNA, 5.8S rRNA, LSU-rRNA)	1.78e-05
22618	ribonucleoprotein complex assembly	6.02e-05
31503	protein-containing complex localization	6.89e-05
70925	organelle assembly	7.51e-05
90305	nucleic acid phosphodiester bond hydrolysis	0.00016
42273	ribosomal large subunit biogenesis	0.00016
71826	ribonucleoprotein complex subunit organization	0.00017
15931	nucleobase-containing compound transport	0.0002
51169	nuclear transport	0.00023
6913	nucleocytoplasmic transport	0.00023
28	ribosomal small subunit assembly	0.00044
6450	regulation of translational fidelity	0.0008
6261	DNA-dependent DNA replication	0.001
6418	tRNA aminoacylation for protein translation	0.00101
2183	cytoplasmic translational initiation	0.00188
43038	amino acid activation	0.00227
43039	tRNA aminoacylation	0.00227
27	ribosomal large subunit assembly	0.00236
6269	DNA replication, synthesis of RNA primer	0.00256
44786	cell cycle DNA replication	0.00293
6520	cellular amino acid metabolic process	0.00316
6260	DNA replication	0.00323
6413	translational initiation	0.00472
460	maturation of 5.8S rRNA	0.005
466	maturation of 5.8S rRNA from tricistronic rRNA transcript (SSU-rRNA, 5.8S rRNA, LSU-rRNA)	0.005
447	endonucleolytic cleavage in ITS1 to separate SSU-rRNA from 5.8S rRNA and LSU-rRNA from tricistronic rRNA transcript (SSU-rRNA, 5.8S rRNA, LSU-rRNA)	0.00593
6270	DNA replication initiation	0.00923
51083	'de novo' cotranslational protein folding	0.01243
33260	nuclear DNA replication	0.01689
1902969	mitotic DNA replication	0.01749
6886	intracellular protein transport	0.03891
6302	double-strand break repair	0.04002
