# Supplementary material for: Genomic insights into multidrug-resistance, mating and virulence in Candida auris and related emerging species
Source: Nat Commun. 2018 Dec 17;9:5346. doi: 10.1038/s41467-018-07779-6 (PMC6297351; doi:10.1038/s41467-018-07779-6)
Supplement: Supplementary file 10 — Supplementary Data 8 [file 41467_2018_7779_MOESM10_ESM.xlsx]

## Sheet: Data8. B11210
Supplementary data 8. Genetic variants, effect and impact in Candida auris B11210
Scaffold	Position		REF	ALT	Effect	Impact	Locus ID	C. albicans ID	C. albicans homologs	Gene name	PFAM	KEGG	GO	KO	TMHMM
scaffold00004	129151	.	GCTAAATACGT	G	FRAME_SHIFT	HIGH	B9J08_000058	C1_02590C_A	SNZ1	pyridoxine biosynthesis protein SNZ1	PF05690.9|ThiG[Thiazole biosynthesis protein ThiG];PF01680.12|SOR_SNZ[SOR/SNZ family];TIGR00343[TIGR00343: pyridoxal 5'-phosphate synthase, synthase subunit Pdx1]	EC:4.-.-.-[Lyases.]	GO:0042823;GO:0008615;GO:0005829;GO:0003824	.	.
scaffold00004	73683	.	C	CT	FRAME_SHIFT	HIGH	B9J08_000030	.	.	hypothetical protein	.	.	.	.	TMH:1
scaffold00005	924694	.	T	A	STOP_GAINED	HIGH	B9J08_001481	.	.	hypothetical protein	.	.	.	.	TMH:4
scaffold00008	43935	.	CT	C	FRAME_SHIFT	HIGH	B9J08_001548	.	.	hypothetical protein	.	.	GO:0055085;GO:0016021	.	TMH:2
scaffold00008	597862	.	A	ATCTTGTTGAAG	FRAME_SHIFT	HIGH	B9J08_001808	C4_06650W_A	.	hypothetical protein	PF09325.5|Vps5[Vps5 C terminal like];PF00787.19|PX[PX domain]	.	GO:0012505;GO:0051179	.	.
scaffold00008	597864	.	C	CAGAAGCACGTCAT	FRAME_SHIFT	HIGH	B9J08_001808	C4_06650W_A	.	hypothetical protein	PF09325.5|Vps5[Vps5 C terminal like];PF00787.19|PX[PX domain]	.	GO:0012505;GO:0051179	.	.
scaffold00009	729465	.	G	T	STOP_GAINED	HIGH	B9J08_002561	.	.	hypothetical protein	.	.	.	.	.
scaffold00001	784953	.	T	C	STOP_LOST	HIGH	B9J08_002959	C2_05640W_A	.	hypothetical protein	PF13921.1|Myb_DNA-bind_6[Myb-like DNA-binding domain];PF00249.26|Myb_DNA-binding[Myb-like DNA-binding domain]	.	GO:0003677	.	.
scaffold00001	1596055	.	C	T	STOP_GAINED	HIGH	B9J08_003375	.	.	hypothetical protein	.	.	.	.	.
scaffold00001	3036681	.	CTT	C	FRAME_SHIFT	HIGH	B9J08_004030	C1_10220C_A	TPK1	cAMP-dependent protein kinase type 3	PF00069.20|Pkinase[Protein kinase domain];PF07714.12|Pkinase_Tyr[Protein tyrosine kinase]	EC:2.7.11.11[cAMP-dependent protein kinase.]	GO:0036171;GO:0000902;GO:0005634;GO:0035690;GO:0005524;GO:0030448;GO:0031505;GO:0006468;GO:1900438;GO:1900231;GO:0004691;EC:2.7.11.11;GO:1900188	ko04970[Salivary secretion];ko05146[Amoebiasis];ko04740[Olfactory transduction];ko04540[Gap junction];ko04340[Hedgehog signaling pathway];ko04962[Vasopressin-regulated water reabsorption];ko04062[Chemokine signaling pathway];ko04910[Insulin signaling pathway];ko04976[Bile secretion];ko04916[Melanogenesis];ko04114[Oocyte meiosis];ko04113[Meiosis - yeast];ko04912[GnRH signaling pathway];ko04914[Pro…	.
scaffold00001	3187845	.	C	CTACTGGTCCCGGT	FRAME_SHIFT	HIGH	B9J08_004100	C5_00730W_A	HYR3	hypothetical protein	PF11765.3|Hyphal_reg_CWP[Hyphally regulated cell wall protein N-terminal]	.	.	.	TMH:1
scaffold00007	836927	.	AT	A	FRAME_SHIFT	HIGH	B9J08_004446	C1_00480C_A	GCN20	hypothetical protein	PF00005.22|ABC_tran[ABC transporter];PF13304.1|AAA_21[AAA domain];PF12848.2|ABC_tran_2[ABC transporter]	.	.	.	.
scaffold00002	19048	.	G	GT	FRAME_SHIFT	HIGH	B9J08_004902	CR_07190W_A	.	hypothetical protein	PF00620.22|RhoGAP[RhoGAP domain];PF00611.18|FCH[Fes/CIP4, and EFC/F-BAR homology domain];PF00610.16|DEP[Domain found in Dishevelled, Egl-10, and Pleckstrin (DEP)]	.	GO:0007264;GO:0031097;GO:0030950;GO:0051285	.	.
scaffold00002	212166	.	G	GCCCACTA	FRAME_SHIFT	HIGH	B9J08_004988	.	.	hypothetical protein	PF00170.16|bZIP_1[bZIP transcription factor];PF07716.10|bZIP_2[Basic region leucine zipper]	.	GO:0006355;GO:0043565;GO:0003700	.	.
scaffold00002	895697	.	G	A	STOP_GAINED	HIGH	B9J08_005311	.	.	hypothetical protein	.	.	.	.	.
scaffold00001	567011	.	C	A	NON_SYNONYMOUS_CODING	MODERATE	B9J08_002852	C3_00760W_A	ERG4	hypothetical protein	PF01222.12|ERG4_ERG24[Ergosterol biosynthesis ERG4/ERG24 family]	EC:1.3.1.71[Delta(24(24(1)))-sterol reductase.]	GO:0005783;GO:0000246;EC:1.3.1.71;GO:0016021;GO:0006696;GO:0055114	.	TMH:8
scaffold00005	493177	.	T	C	SYNONYMOUS_CODING	LOW	B9J08_001296	C5_00190C_A	FAS1	fatty acid synthase subunit beta	PF13452.1|MaoC_dehydrat_N[N-terminal half of MaoC dehydratase];PF00698.16|Acyl_transf_1[Acyl transferase domain];PF01575.14|MaoC_dehydratas[MaoC like domain];PF08354.5|DUF1729[Domain of unknown function (DUF1729)]	EC:2.3.1.86[Fatty-acyl-CoA synthase.]	EC:1.3.1.9;GO:0005835;GO:0004318;GO:0006633;GO:0055114	.	.
scaffold00007	846415	.	A	T	UPSTREAM	MODIFIER	B9J08_004448	CR_03270W_A	.	hypothetical protein	PF07690.11|MFS_1[Major Facilitator Superfamily]	.	GO:0055085;GO:0016021	.	TMH:12
scaffold00002	984101	.	A	C	NON_SYNONYMOUS_CODING	MODERATE	B9J08_005348	CR_01260W_A	.	hypothetical protein	PF02990.11|EMP70[Endomembrane protein 70]	.	GO:0007124;GO:0001403;GO:0006878;GO:0016021;GO:0005622;GO:0007034	.	TMH:9
scaffold00002	738197	.	G	A	NON_SYNONYMOUS_CODING	MODERATE	B9J08_005237	C4_01700C_A	NHP6A	hypothetical protein	PF00505.14|HMG_box[HMG (high mobility group) box];PF09011.5|HMG_box_2[HMG-box domain];PF02845.11|CUE[CUE domain]	.	GO:0003677	.	.
scaffold00007	239789	.	A	G	UPSTREAM	MODIFIER	B9J08_004182	CR_02540W_A	CHO2	hypothetical protein	PF04191.8|PEMT[Phospholipid methyltransferase]	EC:2.1.1.17[Phosphatidylethanolamine N-methyltransferase.]	GO:0016627;GO:0055114;GO:0005737;GO:0004608;GO:0016021;GO:0006656;GO:0032259;EC:2.1.1.17	.	TMH:10
scaffold00003	939047	.	A	G	UPSTREAM	MODIFIER	B9J08_000935	C6_03330C_A	.	hypothetical protein	PF12828.2|PXB[PX-associated];PF00787.19|PX[PX domain];PF12825.2|DUF3818[Domain of unknown function in PX-proteins (DUF3818)]	.	GO:0035091	.	.
scaffold00003	1081672	.	A	G	UPSTREAM	MODIFIER	B9J08_000995	C4_02610C_A	SUL2	hypothetical protein	PF01740.16|STAS[STAS domain];PF13792.1|Sulfate_tra_GLY[Sulfate transporter N-terminal domain with GLY motif];PF00916.15|Sulfate_transp[Sulfate transporter family]	.	GO:1902358;GO:0016021;GO:0008271	.	TMH:9
scaffold00001	2907394	.	C	T	NON_SYNONYMOUS_CODING	MODERATE	B9J08_003973	C5_05230C_A	.	hypothetical protein	PF00675.15|Peptidase_M16[Insulinase (Peptidase family M16)];PF05193.16|Peptidase_M16_C[Peptidase M16 inactive domain]	.	EC:1.10.2.2;GO:1902600;GO:0046872;GO:0016787;GO:0008121;GO:0055114	ko05016[Huntington's disease];ko04260[Cardiac muscle contraction];ko05010[Alzheimer's disease];ko05012[Parkinson's disease]	.
scaffold00001	1159777	.	T	C	SYNONYMOUS_CODING	LOW	B9J08_003166	C1_00420W_A	.	hypothetical protein	PF12697.2|Abhydrolase_6[Alpha/beta hydrolase family]	.	.	.	.
scaffold00006	593683	.	C	CT	UPSTREAM	MODIFIER	B9J08_004725	C5_03480C_A	.	hypothetical protein	PF00474.12|SSF[Sodium:solute symporter family]	.	GO:0055085;GO:0016021;GO:0005215	.	TMH:13
scaffold00001	62580	.	GCCT	G	CODON_CHANGE_PLUS_CODON_DELETION	MODERATE	B9J08_002615	C3_01000W_A	BMS1	hypothetical protein	PF00004.24|AAA[ATPase family associated with various cellular activities (AAA)];PF13671.1|AAA_33[AAA domain];PF00009.22|GTP_EFTU[Elongation factor Tu GTP binding domain];PF04950.7|DUF663[Protein of unknown function (DUF663)];PF08142.7|AARP2CN[AARP2CN (NUC121) domain]	.	GO:0072686;GO:0034511;GO:0030686;GO:0005524;GO:0006364;GO:0003924;GO:0005730;GO:0005739;GO:0005525;GO:0042255	.	.
scaffold00007	863396	.	ATTCTCTTCCTCCTTGTCCATC	A	CODON_CHANGE_PLUS_CODON_DELETION	MODERATE	B9J08_004455	.	.	hypothetical protein	.	.	.	.	.
scaffold00001	3187848	.	C	CGGTGGT	CODON_CHANGE_PLUS_CODON_INSERTION	MODERATE	B9J08_004100	C5_00730W_A	HYR3	hypothetical protein	PF11765.3|Hyphal_reg_CWP[Hyphally regulated cell wall protein N-terminal]	.	.	.	TMH:1
scaffold00003	991425	.	G	GGTA	CODON_INSERTION	MODERATE	B9J08_000958	C1_02360C_A	PGA5	hypothetical protein	PF07983.8|X8[X8 domain];PF03198.9|Glyco_hydro_72[Glucanosyltransferase]	.	GO:0030476;GO:0042124;GO:0005975;GO:0031225;GO:0005886;GO:0005737	.	.
scaffold00001	3081124	.	C	CATG	CODON_INSERTION	MODERATE	B9J08_004053	C1_07220W_A	.	hypothetical protein	.	.	.	.	.
scaffold00001	1732050	.	G	A	NON_SYNONYMOUS_CODING	MODERATE	B9J08_003437	C7_02810W_A	PRX1	hypothetical protein	PF08534.5|Redoxin[Redoxin];PF10417.4|1-cysPrx_C[C-terminal domain of 1-Cys peroxiredoxin];PF00578.16|AhpC-TSA[AhpC/TSA family]	.	EC:1.11.1.15;GO:0098869;GO:0004601;EC:1.11.1.7;GO:0055114;GO:0051920	.	.
scaffold00007	815729	.	G	C	NON_SYNONYMOUS_CODING	MODERATE	B9J08_004438	C3_05290C_A	.	hypothetical protein	PF00013.24|KH_1[KH domain];PF13014.1|KH_3[KH domain]	.	GO:0005840;GO:0003723	.	.
scaffold00006	902700	.	G	C	NON_SYNONYMOUS_CODING	MODERATE	B9J08_004861	C2_01890W_A	CTF1	hypothetical protein	PF04082.13|Fungal_trans[Fungal specific transcription factor domain];PF00172.13|Zn_clus[Fungal Zn(2)-Cys(6) binuclear cluster domain]	.	GO:0006357;GO:0003677;GO:0000981;GO:0005634;GO:0008270;GO:0006351;GO:0016740	.	.
scaffold00003	309299	.	G	C	NON_SYNONYMOUS_CODING	MODERATE	B9J08_000654	C1_00400W_A	SVF1	hypothetical protein	PF08622.5|Svf1[Svf1-like]	.	GO:0005634;GO:0034599;GO:0005829	.	.
scaffold00002	1344411	.	G	T	NON_SYNONYMOUS_CODING	MODERATE	B9J08_005511	C3_04370C_A	.	hypothetical protein	PF10441.4|Urb2[Urb2/Npa2 family]	.	GO:0016072;GO:0042254;GO:0005730;GO:0005829	.	.
scaffold00001	673927	.	G	C	NON_SYNONYMOUS_CODING	MODERATE	B9J08_002900	C3_06700C_A	.	hypothetical protein	.	.	.	.	.
scaffold00005	1037285	.	A	G	NON_SYNONYMOUS_CODING	MODERATE	B9J08_001527	C2_01000W_A	HGT7	hypothetical protein	PF07690.11|MFS_1[Major Facilitator Superfamily];PF00083.19|Sugar_tr[Sugar (and other) transporter]	.	GO:0055085;GO:0016021;GO:0022857	.	TMH:11
scaffold00001	3075311	.	G	A	NON_SYNONYMOUS_CODING	MODERATE	B9J08_004050	C1_09800C_A	TVP18	golgi apparatus membrane protein TVP18	PF10233.4|Cg6151-P[Uncharacterized conserved protein CG6151-P]	.	GO:0030173;GO:0016192	.	TMH:3
scaffold00010	438568	.	G	T	NON_SYNONYMOUS_CODING	MODERATE	B9J08_002146	C7_02330W_B	YCF1	hypothetical protein	PF00005.22|ABC_tran[ABC transporter];PF00664.18|ABC_membrane[ABC transporter transmembrane region]	.	GO:0098849;GO:0000329;GO:0044604;GO:0005524;GO:0005794;GO:0036246;GO:0016021;GO:0071996	.	TMH:16
scaffold00002	779332	.	A	T	NON_SYNONYMOUS_CODING	MODERATE	B9J08_005258	C1_03260W_A	.	hypothetical protein	PF13173.1|AAA_14[AAA domain];PF00004.24|AAA[ATPase family associated with various cellular activities (AAA)];PF00158.21|Sigma54_activat[Sigma-54 interaction domain];PF05496.7|RuvB_N[Holliday junction DNA helicase ruvB N-terminus];PF12002.3|MgsA_C[MgsA AAA+ ATPase C terminal];PF07724.9|AAA_2[AAA domain (Cdc48 subfamily)];PF07728.9|AAA_5[AAA domain (dynein-related subfamily)]	.	GO:0003677;GO:0016787;GO:0005524;GO:0006260;GO:0016740	.	.
scaffold00002	1133480	.	A	C	NON_SYNONYMOUS_CODING	MODERATE	B9J08_005411	C7_01340W_A	MRE11	DNA repair protein (mre11)	TIGR00583[mre11: DNA repair protein (mre11)];PF04152.9|Mre11_DNA_bind[Mre11 DNA-binding presumed domain];PF00149.23|Metallophos[Calcineurin-like phosphoesterase]	.	GO:0003691;GO:0030437;GO:0006284;GO:0004017;GO:0051037;GO:0004520;GO:0031573;GO:0010791;GO:0008408;GO:0007131;GO:0046939;GO:0043047;GO:0000737;GO:0051880;GO:0005739;EC:2.7.4.3;GO:0030145;GO:0032947;GO:0000727;GO:0097552;GO:0035861;GO:0030870;GO:0034613;GO:0006303	ko03450[Non-homologous end-joining]	.
scaffold00001	515009	.	T	C	NON_SYNONYMOUS_CODING	MODERATE	B9J08_002831	C2_06680W_A	FRP3	hypothetical protein	PF01184.14|Grp1_Fun34_YaaH[GPR1/FUN34/yaaH family]	.	GO:0016021	.	TMH:6
scaffold00007	59518	.	T	C	NON_SYNONYMOUS_CODING	MODERATE	B9J08_004116	CR_10660W_A	CKA1	hypothetical protein	PF00069.20|Pkinase[Protein kinase domain];PF07714.12|Pkinase_Tyr[Protein tyrosine kinase]	EC:2.7.11.1[Non-specific serine/threonine protein kinase.]	GO:0006359;GO:0005524;GO:0006468;GO:0005956;GO:0006356;GO:0007535;GO:0004674;EC:2.7.11;GO:0006974;GO:0034456	ko04310[Wnt signaling pathway];ko04712[Circadian rhythm - plant];ko04530[Tight junction];ko05162[Measles];ko04520[Adherens junction]	.
scaffold00002	1049192	.	C	G	NON_SYNONYMOUS_CODING	MODERATE	B9J08_005380	C6_01720C_A	SUR7	hypothetical protein	PF06687.7|SUR7[SUR7/PalI family]	.	GO:0036171;GO:0036244;GO:0036170;GO:0030437;GO:0005938;GO:0030866;GO:0042149;GO:0036178;GO:0005887;GO:0006897;GO:0032126;GO:0036180;GO:0031505;GO:0032185;GO:0045121;GO:0044011	.	TMH:4
scaffold00005	321476	.	G	C	NON_SYNONYMOUS_CODING	MODERATE	B9J08_001216	C2_06100W_A	PMT4	hypothetical protein	PF02815.14|MIR[MIR domain];PF02366.13|PMT[Dolichyl-phosphate-mannose-protein mannosyltransferase]	EC:2.4.1.109[Dolichyl-phosphate-mannose-protein mannosyltransferase.]	GO:1900101;GO:0045861;GO:0036244;GO:0035690;GO:0042802;GO:0031505;GO:0036178;GO:0004169;GO:0035269;GO:0044011;GO:0097586;GO:0016021;EC:2.4.1.109;GO:0005886;GO:0009405	.	TMH:11
scaffold00001	770908	.	C	T	NON_SYNONYMOUS_CODING	MODERATE	B9J08_002953	C2_06010W_A	SPO72	hypothetical protein	PF09333.6|ATG_C[ATG C terminal domain];PF13329.1|ATG2_CAD[Autophagy-related protein 2 CAD motif]	.	GO:0032258;GO:0044805;GO:0030242;GO:0000045;GO:0034727;GO:0000422;GO:0097632	.	.
scaffold00004	350921	.	T	A	NON_SYNONYMOUS_CODING	MODERATE	B9J08_000164	C3_05220W_A	CDR1	multidrug resistance protein CDR1	PF03193.11|DUF258[Protein of unknown function, DUF258];PF00005.22|ABC_tran[ABC transporter];PF01061.19|ABC2_membrane[ABC-2 type transporter];PF06422.7|PDR_CDR[CDR ABC transporter];PF14510.1|ABC_trans_N[ABC-transporter extracellular N-terminal]	.	GO:0035690;GO:0005524;GO:0046677;GO:0046618;EC:3.6.3.44;GO:0046898;GO:0016021;GO:0008559;GO:0005886;GO:0042908;GO:0006855	.	TMH:12
scaffold00002	426639	.	G	T	NON_SYNONYMOUS_CODING	MODERATE	B9J08_005092	C7_01710W_A	.	hypothetical protein	PF12955.2|DUF3844[Domain of unknown function (DUF3844)]	.	GO:0005783	.	.
scaffold00001	755093	.	A	T	NON_SYNONYMOUS_CODING	MODERATE	B9J08_002945	C2_04760W_A	KIC1	hypothetical protein	PF14531.1|Kinase-like[Kinase-like];PF00069.20|Pkinase[Protein kinase domain];PF07714.12|Pkinase_Tyr[Protein tyrosine kinase]	.	GO:0036244;GO:0036170;GO:0035690;GO:0009267;GO:0005524;GO:0043332;GO:0005737;GO:0036178;GO:0007118;GO:0000920;GO:0007163;GO:0000131;GO:0000902;GO:0036180;GO:1900233;GO:0006468;GO:0031505;GO:0044011;GO:0004674;EC:2.7.11;GO:0005933	.	.
scaffold00001	755094	.	C	G	NON_SYNONYMOUS_CODING	MODERATE	B9J08_002945	C2_04760W_A	KIC1	hypothetical protein	PF14531.1|Kinase-like[Kinase-like];PF00069.20|Pkinase[Protein kinase domain];PF07714.12|Pkinase_Tyr[Protein tyrosine kinase]	.	GO:0036244;GO:0036170;GO:0035690;GO:0009267;GO:0005524;GO:0043332;GO:0005737;GO:0036178;GO:0007118;GO:0000920;GO:0007163;GO:0000131;GO:0000902;GO:0036180;GO:1900233;GO:0006468;GO:0031505;GO:0044011;GO:0004674;EC:2.7.11;GO:0005933	.	.
scaffold00005	833913	.	T	A	NON_SYNONYMOUS_CODING	MODERATE	B9J08_001448	C5_00660C_A	ERG11	lanosterol 14-alpha demethylase	PF00067.17|p450[Cytochrome P450]	EC:1.14.13.70[Sterol 14-demethylase.]	GO:0020037;GO:0005783;GO:0008168;GO:0005506;GO:0008398;GO:0006696;GO:0055114;GO:0070988;GO:0016021;EC:1.14.13.70;GO:0032259	.	TMH:2
scaffold00002	851674	.	T	C	NON_SYNONYMOUS_CODING	MODERATE	B9J08_005289	C3_05580C_A	GAP2	hypothetical protein	PF00324.16|AA_permease[Amino acid permease];PF13520.1|AA_permease_2[Amino acid permease]	.	GO:0003333;GO:0016021;GO:0015171	.	TMH:13
scaffold00009	544972	.	T	A	NON_SYNONYMOUS_CODING	MODERATE	B9J08_002476	CR_02850C_A	GZF3	nitrogen regulatory protein DAL80	PF00320.22|GATA[GATA zinc finger]	.	GO:0000122;GO:0000981;GO:0005634;GO:0043565;GO:0008270;GO:0090295;GO:0051457;GO:0006366	.	.
scaffold00010	608769	.	C	T	NON_SYNONYMOUS_CODING	MODERATE	B9J08_002224	C4_06500W_A	CDC68	FACT complex subunit SPT16	PF14826.1|FACT-Spt16_Nlob[FACT complex subunit SPT16 N-terminal lobe domain];PF00557.19|Peptidase_M24[Metallopeptidase family M24];PF08512.7|Rtt106[Histone chaperone Rttp106-like];PF08644.6|SPT16[FACT complex subunit (SPT16/CDC68)]	.	GO:0034401;GO:0006281;GO:0044732;GO:0045899;GO:0034724;GO:0006334;GO:0035101;GO:0000790;GO:0006368;GO:0032784;GO:0031298;GO:0051301;GO:0006261	.	.
scaffold00002	1392113	.	C	T	NON_SYNONYMOUS_CODING	MODERATE	B9J08_005531	C1_09530W_A	RAM2	hypothetical protein	PF01239.17|PPTA[Protein prenyltransferase alpha subunit repeat]	EC:2.5.1.59[Protein geranylgeranyltransferase type I.];EC:2.5.1.58[Protein farnesyltransferase.]	GO:0018342;GO:0008318	.	.
scaffold00004	61072	.	C	A	NON_SYNONYMOUS_CODING	MODERATE	B9J08_000023	C1_04400C_A	APE2	aminopeptidase 2	PF11838.3|ERAP1_C[ERAP1-like C-terminal domain];PF13485.1|Peptidase_MA_2[Peptidase MA superfamily];PF01433.15|Peptidase_M1[Peptidase family M1]	EC:3.4.11.7[Glutamyl aminopeptidase.];EC:3.4.11.-[Aminopeptidases.]	EC:3.4.11;GO:0006508;GO:0008237;GO:0004177;GO:0005618;GO:0005829;GO:0008270;GO:0005576	.	.
scaffold00004	98980	.	A	G	NON_SYNONYMOUS_CODING	MODERATE	B9J08_000043	C3_06290W_A	.	hypothetical protein	.	.	.	.	.
scaffold00004	120950	.	G	C	NON_SYNONYMOUS_CODING	MODERATE	B9J08_000055	C1_02620C_A	HOM6	hypothetical protein	PF03447.11|NAD_binding_3[Homoserine dehydrogenase, NAD binding domain];PF00742.14|Homoserine_dh[Homoserine dehydrogenase];PF01118.19|Semialdhyde_dh[Semialdehyde dehydrogenase, NAD binding domain]	EC:1.1.1.3[Homoserine dehydrogenase.]	GO:0050661;EC:1.1.1.3;GO:0009090;GO:0009097;GO:0009088;GO:0055114;GO:0004412;GO:0009086	ko00270[Cysteine and methionine metabolism];ko00300[Lysine biosynthesis]	.
scaffold00004	139232	.	A	G	NON_SYNONYMOUS_CODING	MODERATE	B9J08_000062	C2_06830C_A	FHL1	hypothetical protein	PF00250.13|Fork_head[Fork head domain];PF00498.21|FHA[FHA domain]	.	GO:0010688;GO:0001226;GO:0032545;GO:0070491;GO:0006351;GO:0000790;GO:0060963;GO:0005730;GO:0001225;GO:0043565;GO:0003700	.	.
scaffold00004	139265	.	T	G	NON_SYNONYMOUS_CODING	MODERATE	B9J08_000062	C2_06830C_A	FHL1	hypothetical protein	PF00250.13|Fork_head[Fork head domain];PF00498.21|FHA[FHA domain]	.	GO:0010688;GO:0001226;GO:0032545;GO:0070491;GO:0006351;GO:0000790;GO:0060963;GO:0005730;GO:0001225;GO:0043565;GO:0003700	.	.
scaffold00004	194739	.	T	A	NON_SYNONYMOUS_CODING	MODERATE	B9J08_000092	C3_05210C_A	DYN1	hypothetical protein	PF00004.24|AAA[ATPase family associated with various cellular activities (AAA)];PF03028.10|Dynein_heavy[Dynein heavy chain and region D6 of dynein motor];PF12777.2|MT[Microtubule-binding stalk of dynein motor];PF08385.7|DHC_N1[Dynein heavy chain, N-terminal region 1];PF08393.8|DHC_N2[Dynein heavy chain, N-terminal region 2];PF12774.2|AAA_6[Hydrolytic ATP binding site of dynein motor region D1];PF…	.	.	ko04962[Vasopressin-regulated water reabsorption]	.
scaffold00004	201256	.	T	C	NON_SYNONYMOUS_CODING	MODERATE	B9J08_000092	C3_05210C_A	DYN1	hypothetical protein	PF00004.24|AAA[ATPase family associated with various cellular activities (AAA)];PF03028.10|Dynein_heavy[Dynein heavy chain and region D6 of dynein motor];PF12777.2|MT[Microtubule-binding stalk of dynein motor];PF08385.7|DHC_N1[Dynein heavy chain, N-terminal region 1];PF08393.8|DHC_N2[Dynein heavy chain, N-terminal region 2];PF12774.2|AAA_6[Hydrolytic ATP binding site of dynein motor region D1];PF…	.	.	ko04962[Vasopressin-regulated water reabsorption]	.
scaffold00004	234311	.	A	T	NON_SYNONYMOUS_CODING	MODERATE	B9J08_000106	CR_08130W_A	.	hypothetical protein	PF05176.9|ATP-synt_10[ATP10 protein]	.	GO:0033615;GO:0051082;GO:0005743;GO:0032592	.	.
scaffold00004	246983	.	T	C	NON_SYNONYMOUS_CODING	MODERATE	B9J08_000112	CR_08600C_A	PEX19	hypothetical protein	PF04614.7|Pex19[Pex19 protein family]	.	GO:0045033;GO:0005783;GO:0032581;GO:0032527;GO:1990415;GO:0005829;GO:0045046;GO:0050821;GO:0005778;GO:0033328	.	.
scaffold00004	255850	.	C	A	NON_SYNONYMOUS_CODING	MODERATE	B9J08_000117	.	.	hypothetical protein	.	.	.	.	.
scaffold00004	258901	.	A	T	NON_SYNONYMOUS_CODING	MODERATE	B9J08_000118	CR_08500W_A	.	hypothetical protein	.	.	GO:0005634;GO:0005829;GO:0006606;GO:0042273	.	.
scaffold00004	510900	.	G	T	NON_SYNONYMOUS_CODING	MODERATE	B9J08_000241	C1_10920W_A	.	hypothetical protein	.	.	GO:0001041;GO:0000127;GO:0001021;GO:0000999	.	.
scaffold00004	549701	.	T	A	NON_SYNONYMOUS_CODING	MODERATE	B9J08_000264	C1_08560W_A	TCP1	T-complex protein 1 subunit alpha	PF00118.19|Cpn60_TCP1[TCP-1/cpn60 chaperonin family];TIGR02340[chap_CCT_alpha: T-complex protein 1, alpha subunit]	.	GO:0006457;GO:0005634;GO:0005524;GO:0051082;GO:0005832	.	.
scaffold00004	581527	.	C	G	NON_SYNONYMOUS_CODING	MODERATE	B9J08_000285	C3_04550C_A	CMK1	hypothetical protein	PF00069.20|Pkinase[Protein kinase domain];PF07714.12|Pkinase_Tyr[Protein tyrosine kinase]	.	GO:0005524;GO:0004674;EC:2.7.11;GO:0006468	.	.
scaffold00004	586233	.	T	A	NON_SYNONYMOUS_CODING	MODERATE	B9J08_000286	C3_04560W_A	MAK21	hypothetical protein	PF03914.12|CBF[CBF/Mak21 family]	.	GO:0035690;GO:0005730;GO:0030690;GO:0000027	.	.
scaffold00004	590860	.	T	A	NON_SYNONYMOUS_CODING	MODERATE	B9J08_000288	C3_04470W_A	PKC1	hypothetical protein	PF00433.19|Pkinase_C[Protein kinase C terminal domain];PF00130.17|C1_1[Phorbol esters/diacylglycerol binding domain (C1 domain)];PF00069.20|Pkinase[Protein kinase domain];PF07714.12|Pkinase_Tyr[Protein tyrosine kinase];PF02185.11|HR1[Hr1 repeat]	EC:2.7.11.13[Protein kinase C.]	GO:0005524;GO:0035556;GO:0032153;GO:0060237;GO:0007015;GO:0005829;GO:0030427;GO:0005856;GO:0005634;GO:0060211;GO:0006468;GO:0030242;GO:0004697;GO:0046872;EC:2.7.11.13;GO:0033962;GO:0090334	ko04970[Salivary secretion];ko05146[Amoebiasis];ko04540[Gap junction];ko04666[Fc gamma R-mediated phagocytosis];ko04745[Phototransduction - fly];ko05214[Glioma];ko05200[Pathways in cancer];ko04070[Phosphatidylinositol signaling system];ko05143[African trypanosomiasis];ko04650[Natural killer cell mediated cytotoxicity];ko04670[Leukocyte transendothelial migration];ko04730[Long-term depression];ko0…	.
scaffold00004	597845	.	T	C	NON_SYNONYMOUS_CODING	MODERATE	B9J08_000290	C1_11400C_A	GIN4	hypothetical protein	PF00069.20|Pkinase[Protein kinase domain];PF07714.12|Pkinase_Tyr[Protein tyrosine kinase]	.	GO:0005524;GO:0044257;GO:0005935;GO:0046777;GO:0004672;GO:0005940;GO:0000086;GO:0051726	.	.
scaffold00004	607214	.	T	C	NON_SYNONYMOUS_CODING	MODERATE	B9J08_000295	.	.	hypothetical protein	.	.	GO:0016021	.	TMH:1
scaffold00004	671291	.	G	A	NON_SYNONYMOUS_CODING	MODERATE	B9J08_000331	C4_03790W_A	RPN6	hypothetical protein	PF01399.22|PCI[PCI domain]	.	GO:0043248;GO:0005634;GO:0006511;GO:0008541;GO:0005198;GO:0034515	.	.
scaffold00004	764852	.	A	T	NON_SYNONYMOUS_CODING	MODERATE	B9J08_000376	CR_05030W_A	.	hypothetical protein	.	.	.	.	.
scaffold00004	766172	.	C	A	NON_SYNONYMOUS_CODING	MODERATE	B9J08_000376	CR_05030W_A	.	hypothetical protein	.	.	.	.	.
scaffold00004	768601	.	G	C	NON_SYNONYMOUS_CODING	MODERATE	B9J08_000378	CR_01580C_A	DOT6	hypothetical protein	PF13921.1|Myb_DNA-bind_6[Myb-like DNA-binding domain]	.	GO:0003677	.	.
scaffold00004	840776	.	G	A	NON_SYNONYMOUS_CODING	MODERATE	B9J08_000412	C3_02560W_A	DDC1	hypothetical protein	PF04139.8|Rad9[Rad9]	.	GO:0031573;GO:0000725;GO:0051598;GO:0030896	ko04113[Meiosis - yeast]	.
scaffold00004	866071	.	T	C	NON_SYNONYMOUS_CODING	MODERATE	B9J08_000422	C5_01100C_A	CLN3	hypothetical protein	PF00134.18|Cyclin_N[Cyclin, N-terminal domain]	.	GO:0035690;GO:0007114;GO:0030448;GO:0016538;GO:0000082;GO:0044182;GO:1900429;GO:0000079	.	.
scaffold00004	893345	.	T	A	NON_SYNONYMOUS_CODING	MODERATE	B9J08_000432	C1_06360W_A	.	hypothetical protein	PF14531.1|Kinase-like[Kinase-like];PF00069.20|Pkinase[Protein kinase domain];PF07714.12|Pkinase_Tyr[Protein tyrosine kinase]	.	GO:0005524;GO:0004674;EC:2.7.11;GO:0006468	.	.
scaffold00004	921231	.	T	G	NON_SYNONYMOUS_CODING	MODERATE	B9J08_000440	.	.	hypothetical protein	.	.	.	.	.
scaffold00004	925494	.	G	C	NON_SYNONYMOUS_CODING	MODERATE	B9J08_000441	.	.	hypothetical protein	.	.	.	.	.
scaffold00003	16067	.	T	A	NON_SYNONYMOUS_CODING	MODERATE	B9J08_000510	C2_03240C_A	ROM2	hypothetical protein	PF15405.1|PH_5[Pleckstrin homology domain];PF00621.15|RhoGEF[RhoGEF domain];PF00610.16|DEP[Domain found in Dishevelled, Egl-10, and Pleckstrin (DEP)];PF00780.17|CNH[CNH domain]	.	GO:0005622;GO:0043547;GO:0035556;GO:0035023;GO:0005089	.	.
scaffold00003	38118	.	G	C	NON_SYNONYMOUS_CODING	MODERATE	B9J08_000514	C6_00510C_A	RAD52	hypothetical protein	PF04098.10|Rad52_Rad22[Rad52/22 family double-strand break repair protein]	.	GO:0045002;GO:0000722;GO:0000727;GO:0000733;GO:0000228;GO:0000150;GO:0000709;GO:0006277;GO:0000730;GO:0006301	.	.
scaffold00003	38523	.	T	C	NON_SYNONYMOUS_CODING	MODERATE	B9J08_000514	C6_00510C_A	RAD52	hypothetical protein	PF04098.10|Rad52_Rad22[Rad52/22 family double-strand break repair protein]	.	GO:0045002;GO:0000722;GO:0000727;GO:0000733;GO:0000228;GO:0000150;GO:0000709;GO:0006277;GO:0000730;GO:0006301	.	.
scaffold00003	75626	.	G	T	NON_SYNONYMOUS_CODING	MODERATE	B9J08_000534	CR_10440W_A	.	hypothetical protein	.	.	GO:0090618;GO:0005634;GO:0031391;GO:0003682;GO:0006261;GO:0005739;GO:0000724;GO:0010526;GO:0007064	.	.
scaffold00003	120184	.	A	T	NON_SYNONYMOUS_CODING	MODERATE	B9J08_000561	CR_09650W_A	WAL1	hypothetical protein	PF00568.18|WH1[WH1 domain];PF02205.15|WH2[WH2 motif]	.	GO:1903475;GO:0071963;GO:0000147;GO:0043332;GO:0044397;GO:0045010;GO:0003779;GO:0030479;GO:1902404;GO:0032233;GO:2000601;GO:0006897;GO:0030041	.	.
scaffold00003	124322	.	A	C	NON_SYNONYMOUS_CODING	MODERATE	B9J08_000563	.	.	hypothetical protein	PF07683.9|CobW_C[Cobalamin synthesis protein cobW C-terminal domain];PF02492.14|cobW[CobW/HypB/UreG, nucleotide-binding domain]	.	.	.	.
scaffold00003	125040	.	G	A	NON_SYNONYMOUS_CODING	MODERATE	B9J08_000563	.	.	hypothetical protein	PF07683.9|CobW_C[Cobalamin synthesis protein cobW C-terminal domain];PF02492.14|cobW[CobW/HypB/UreG, nucleotide-binding domain]	.	.	.	.
scaffold00003	141046	.	C	G	NON_SYNONYMOUS_CODING	MODERATE	B9J08_000573	CR_07360W_A	PIF1	hypothetical protein	PF00004.24|AAA[ATPase family associated with various cellular activities (AAA)];PF13401.1|AAA_22[AAA domain];PF13604.1|AAA_30[AAA domain];PF05970.9|PIF1[PIF1-like helicase]	EC:3.6.4.12[DNA helicase.]	GO:0000722;GO:0005634;GO:0000727;GO:0005524;GO:0051974;GO:0032508;GO:0010521;GO:0044806;GO:0003697;GO:0043141;GO:0000002;GO:0031966;GO:0051880;GO:0032211	.	.
scaffold00003	190498	.	C	A	NON_SYNONYMOUS_CODING	MODERATE	B9J08_000594	.	.	hypothetical protein	PF14604.1|SH3_9[Variant SH3 domain];PF00018.23|SH3_1[SH3 domain];PF00787.19|PX[PX domain]	.	GO:0035091	.	.
scaffold00003	199617	.	A	T	NON_SYNONYMOUS_CODING	MODERATE	B9J08_000599	C1_06400C_A	.	hypothetical protein	PF03399.11|SAC3_GANP[SAC3/GANP/Nin1/mts3/eIF-3 p25 family]	.	GO:0000398	.	.
scaffold00003	229394	.	G	T	NON_SYNONYMOUS_CODING	MODERATE	B9J08_000611	C1_06530C_A	.	hypothetical protein	PF00443.24|UCH[Ubiquitin carboxyl-terminal hydrolase];PF13423.1|UCH_1[Ubiquitin carboxyl-terminal hydrolase]	EC:3.1.2.15[Ubiquitin thiolesterase.]	GO:0004843;GO:0005634;GO:0006511;GO:0016579;GO:0005737	.	.
scaffold00003	252832	.	T	G	NON_SYNONYMOUS_CODING	MODERATE	B9J08_000620	C1_03960C_A	.	hypothetical protein	PF00498.21|FHA[FHA domain]	.	.	.	.
scaffold00003	259729	.	T	C	NON_SYNONYMOUS_CODING	MODERATE	B9J08_000626	C1_03930W_A	.	hypothetical protein	.	.	GO:0016021	.	TMH:1
scaffold00003	260242	.	T	C	NON_SYNONYMOUS_CODING	MODERATE	B9J08_000626	C1_03930W_A	.	hypothetical protein	.	.	GO:0016021	.	TMH:1
scaffold00003	265536	.	C	T	NON_SYNONYMOUS_CODING	MODERATE	B9J08_000628	C4_07220C_A	.	hypothetical protein	PF12717.2|Cnd1[non-SMC mitotic condensation complex subunit 1];PF12830.2|Nipped-B_C[Sister chromatid cohesion C-terminus]	.	GO:0010468;GO:0070058;GO:0007076;GO:0070550;GO:0032116;GO:0005829;GO:0003682;GO:0070317;GO:0071169;GO:1990414;GO:0034184;GO:0051315;GO:0071921;GO:0000972;GO:0000790;GO:0034990;GO:0034087;GO:0005729	.	.
scaffold00003	298870	.	A	G	NON_SYNONYMOUS_CODING	MODERATE	B9J08_000649	C1_01680C_A	.	protein FYV4%2C mitochondrial	PF09597.5|IGR[IGR protein motif]	.	GO:0005739	.	.
scaffold00003	382385	.	G	A	NON_SYNONYMOUS_CODING	MODERATE	B9J08_000686	CR_00620C_A	ARG1	argininosuccinate synthase	PF00764.14|Arginosuc_synth[Arginosuccinate synthase];PF06508.8|QueC[Queuosine biosynthesis protein QueC];TIGR00032[argG: argininosuccinate synthase];PF00733.16|Asn_synthase[Asparagine synthase]	EC:6.3.4.5[Argininosuccinate synthase.]	GO:0005524;EC:6.3.4.5;GO:0004055;GO:0005829;GO:0006526	ko00330[Arginine and proline metabolism]	.
scaffold00003	455274	.	G	T	NON_SYNONYMOUS_CODING	MODERATE	B9J08_000717	C7_01070C_A	.	hypothetical protein	.	.	.	.	.
scaffold00003	483637	.	T	C	NON_SYNONYMOUS_CODING	MODERATE	B9J08_000730	C2_03930C_A	SNF6	hypothetical protein	.	.	.	.	.
scaffold00003	548889	.	T	A	NON_SYNONYMOUS_CODING	MODERATE	B9J08_000759	C6_04550C_A	.	hypothetical protein	PF01740.16|STAS[STAS domain];PF13792.1|Sulfate_tra_GLY[Sulfate transporter N-terminal domain with GLY motif];PF00916.15|Sulfate_transp[Sulfate transporter family]	.	GO:1902358;GO:0044464;GO:0016021;GO:0008271	.	TMH:9
scaffold00003	592530	.	A	C	NON_SYNONYMOUS_CODING	MODERATE	B9J08_000777	C1_03400W_A	.	hypothetical protein	PF02752.17|Arrestin_C[Arrestin (or S-antigen), C-terminal domain];PF00339.24|Arrestin_N[Arrestin (or S-antigen), N-terminal domain]	.	GO:0031625	.	.
scaffold00003	645545	.	T	C	NON_SYNONYMOUS_CODING	MODERATE	B9J08_000799	CR_06140W_A	.	hypothetical protein	.	.	.	.	.
scaffold00003	662368	.	A	G	NON_SYNONYMOUS_CODING	MODERATE	B9J08_000806	CR_06290C_A	.	hypothetical protein	.	.	GO:0016021	.	TMH:1
scaffold00003	679577	.	A	G	NON_SYNONYMOUS_CODING	MODERATE	B9J08_000815	C5_02900W_A	.	hypothetical protein	PF00400.27|WD40[WD domain, G-beta repeat]	.	GO:0000122;GO:0000124;GO:0045944;GO:0017025;GO:0003712;GO:0016573	.	.
scaffold00003	706064	.	C	T	NON_SYNONYMOUS_CODING	MODERATE	B9J08_000828	C6_01470W_A	.	hypothetical protein	PF00089.21|Trypsin[Trypsin];PF13365.1|Trypsin_2[Trypsin-like peptidase domain]	.	.	.	.
scaffold00003	773580	.	A	T	NON_SYNONYMOUS_CODING	MODERATE	B9J08_000859	.	.	hypothetical protein	.	.	.	.	TMH:1
scaffold00003	783623	.	C	T	NON_SYNONYMOUS_CODING	MODERATE	B9J08_000864	C2_04180C_A	.	hypothetical protein	PF00153.22|Mito_carr[Mitochondrial carrier protein]	.	GO:1902557;GO:1902559;GO:0046964;GO:0016021;GO:0005739;GO:1902558	.	TMH:2
scaffold00003	785125	.	C	A	NON_SYNONYMOUS_CODING	MODERATE	B9J08_000865	.	.	hypothetical protein	PF06522.6|B12D[NADH-ubiquinone reductase complex 1 MLRQ subunit]	.	GO:0072348;GO:1901682;GO:0015711;GO:0072530;GO:0005346;GO:1901679;GO:0000295;GO:0015868;GO:0016021;GO:0008514;GO:0098656;GO:0051503;GO:0044444	.	TMH:1
scaffold00003	794602	.	G	C	NON_SYNONYMOUS_CODING	MODERATE	B9J08_000871	CR_04480C_A	LAP3	hypothetical protein	PF03051.10|Peptidase_C1_2[Peptidase C1-like family]	EC:3.4.22.40[Bleomycin hydrolase.]	EC:3.4.11;GO:0006508;GO:0004177;GO:0004197;EC:3.4.22	.	.
scaffold00003	795131	.	G	T	NON_SYNONYMOUS_CODING	MODERATE	B9J08_000871	CR_04480C_A	LAP3	hypothetical protein	PF03051.10|Peptidase_C1_2[Peptidase C1-like family]	EC:3.4.22.40[Bleomycin hydrolase.]	EC:3.4.11;GO:0006508;GO:0004177;GO:0004197;EC:3.4.22	.	.
scaffold00003	818451	.	G	A	NON_SYNONYMOUS_CODING	MODERATE	B9J08_000883	C2_05750W_A	.	hypothetical protein	PF07767.6|Nop53[Nop53 (60S ribosomal biogenesis)]	.	GO:0000055;GO:0005730;GO:0000463;GO:0019843	.	.
scaffold00003	854182	.	C	T	NON_SYNONYMOUS_CODING	MODERATE	B9J08_000902	C3_05470W_A	TEA1	hypothetical protein	PF04082.13|Fungal_trans[Fungal specific transcription factor domain];PF00172.13|Zn_clus[Fungal Zn(2)-Cys(6) binuclear cluster domain]	.	GO:0006357;GO:0003677;GO:0000981;GO:0005634;GO:0008270;GO:0016021;GO:0006351	.	.
scaffold00003	877776	.	C	G	NON_SYNONYMOUS_CODING	MODERATE	B9J08_000910	C4_06210C_A	.	hypothetical protein	PF01926.18|MMR_HSR1[50S ribosome-binding GTPase];PF08701.6|GN3L_Grn1[GNL3L/Grn1 putative GTPase];PF02421.13|FeoB_N[Ferrous iron transport protein B]	.	GO:0003723;GO:0030687;GO:0006364;GO:0003924;GO:0000055;GO:0040010;GO:0005730;GO:0005525	.	.
scaffold00003	957975	.	T	G	NON_SYNONYMOUS_CODING	MODERATE	B9J08_000939	C4_05700W_B	ZCF5	hypothetical protein	PF04082.13|Fungal_trans[Fungal specific transcription factor domain];PF00172.13|Zn_clus[Fungal Zn(2)-Cys(6) binuclear cluster domain]	.	GO:0006357;GO:0003677;GO:0000981;GO:0005634;GO:0008270;GO:0006351	.	.
scaffold00003	973311	.	T	C	NON_SYNONYMOUS_CODING	MODERATE	B9J08_000946	C1_02240W_A	.	hypothetical protein	PF13513.1|HEAT_EZ[HEAT-like repeat];PF03810.14|IBN_N[Importin-beta N-terminal domain];PF02985.17|HEAT[HEAT repeat]	.	GO:0006612;GO:0005643;GO:0008565;GO:0000176;GO:1990023;GO:0043547;GO:0005737;GO:0005087;GO:0034399;GO:0060188;GO:0006606;GO:0006656;GO:0051292	.	.
scaffold00003	974740	.	A	C	NON_SYNONYMOUS_CODING	MODERATE	B9J08_000946	C1_02240W_A	.	hypothetical protein	PF13513.1|HEAT_EZ[HEAT-like repeat];PF03810.14|IBN_N[Importin-beta N-terminal domain];PF02985.17|HEAT[HEAT repeat]	.	GO:0006612;GO:0005643;GO:0008565;GO:0000176;GO:1990023;GO:0043547;GO:0005737;GO:0005087;GO:0034399;GO:0060188;GO:0006606;GO:0006656;GO:0051292	.	.
scaffold00003	1027316	.	A	G	NON_SYNONYMOUS_CODING	MODERATE	B9J08_000969	C1_00390W_A	ENA2	potassium/sodium efflux P-type ATPase%2C fungal-type	PF13246.1|Hydrolase_like2[Putative hydrolase of sodium-potassium ATPase alpha subunit];PF00689.16|Cation_ATPase_C[Cation transporting ATPase, C-terminus];PF00690.21|Cation_ATPase_N[Cation transporter/ATPase, N-terminus];PF00702.21|Hydrolase[haloacid dehalogenase-like hydrolase];PF12710.2|HAD[haloacid dehalogenase-like hydrolase];PF00122.15|E1-E2_ATPase[E1-E2 ATPase];TIGR01523[ATPase-IID_K-Na: pot…	.	GO:0070588;GO:0046872;GO:0005524;GO:0005388;GO:0016021;EC:3.6.3.8	.	TMH:10
scaffold00003	1043926	.	A	G	NON_SYNONYMOUS_CODING	MODERATE	B9J08_000976	CR_07400C_A	LPD1	dihydrolipoyl dehydrogenase	PF02852.17|Pyr_redox_dim[Pyridine nucleotide-disulphide oxidoreductase, dimerisation domain];PF00070.22|Pyr_redox[Pyridine nucleotide-disulphide oxidoreductase];PF01134.17|GIDA[Glucose inhibited division protein A];TIGR01350[lipoamide_DH: dihydrolipoyl dehydrogenase];PF07992.9|Pyr_redox_2[Pyridine nucleotide-disulphide oxidoreductase]	EC:1.8.1.4[Dihydrolipoyl dehydrogenase.]	EC:1.8.1.4;GO:0009353;GO:0004148;GO:0005960;GO:0042645;GO:0050660;GO:0055114;GO:0045454;GO:0006574;EC:1.4.4.2;GO:0006564;GO:0036180;GO:0006090;GO:0006546;GO:0042743;EC:1.2.4.2;GO:0004375;GO:0006552;GO:0004738;GO:0006103;GO:0004591;GO:0005967;GO:0006550	ko00020[Citrate cycle (TCA cycle)];ko00260[Glycine, serine and threonine metabolism];ko00280[Valine, leucine and isoleucine degradation];ko00620[Pyruvate metabolism]	.
scaffold00003	1065182	.	A	T	NON_SYNONYMOUS_CODING	MODERATE	B9J08_000985	CR_08980C_A	.	hypothetical protein	.	.	GO:0009306;GO:0007015;GO:0030479;GO:0005634;GO:0030866;GO:0006897;GO:0008157	.	.
scaffold00003	1129825	.	C	T	NON_SYNONYMOUS_CODING	MODERATE	B9J08_001016	C7_00290C_A	HGT13	hypothetical protein	PF07690.11|MFS_1[Major Facilitator Superfamily];PF00083.19|Sugar_tr[Sugar (and other) transporter]	.	GO:0055085;GO:0016021;GO:0022857	.	TMH:12
scaffold00003	1174438	.	G	C	NON_SYNONYMOUS_CODING	MODERATE	B9J08_001033	C7_02640W_A	TOM70	hypothetical protein	PF00515.23|TPR_1[Tetratricopeptide repeat];PF13181.1|TPR_8[Tetratricopeptide repeat];PF13414.1|TPR_11[TPR repeat];PF12895.2|Apc3[Anaphase-promoting complex, cyclosome, subunit 3];PF07719.12|TPR_2[Tetratricopeptide repeat]	.	GO:0016787;GO:0016021	.	TMH:1
scaffold00003	1177520	.	G	T	NON_SYNONYMOUS_CODING	MODERATE	B9J08_001035	.	.	hypothetical protein	PF09793.4|AD[Anticodon-binding domain]	.	.	.	.
scaffold00003	1194618	.	G	A	NON_SYNONYMOUS_CODING	MODERATE	B9J08_001043	C1_01610C_A	.	hypothetical protein	PF03134.14|TB2_DP1_HVA22[TB2/DP1, HVA22 family]	.	GO:0016021	.	TMH:2
scaffold00005	16571	.	G	T	NON_SYNONYMOUS_CODING	MODERATE	B9J08_001069	C6_02450W_A	.	hypothetical protein	.	.	GO:0005783;GO:0000329;GO:0005794	.	.
scaffold00005	30386	.	G	A	NON_SYNONYMOUS_CODING	MODERATE	B9J08_001075	C6_03010W_A	TEL1	hypothetical protein	PF11640.3|TAN[Telomere-length maintenance and DNA damage repair];PF02260.15|FATC[FATC domain];PF00454.22|PI3_PI4_kinase[Phosphatidylinositol 3- and 4-kinase]	EC:2.7.11.1[Non-specific serine/threonine protein kinase.]	GO:0010212;GO:0006281;GO:0005524;GO:0000077;GO:0090399;GO:0004674;EC:2.7.11;GO:0016572;GO:0000723	ko04115[p53 signaling pathway];ko04210[Apoptosis]	.
scaffold00005	37652	.	G	A	NON_SYNONYMOUS_CODING	MODERATE	B9J08_001077	C6_02690C_B	.	hypothetical protein	PF14259.1|RRM_6[RNA recognition motif (a.k.a. RRM, RBD, or RNP domain)];PF13893.1|RRM_5[RNA recognition motif. (a.k.a. RRM, RBD, or RNP domain)];PF00076.17|RRM_1[RNA recognition motif. (a.k.a. RRM, RBD, or RNP domain)]	.	GO:0005634;GO:0006338;GO:0000398;GO:0008266;GO:0000166;GO:0005829;GO:0000932;GO:1902625	.	.
scaffold00005	44573	.	A	T	NON_SYNONYMOUS_CODING	MODERATE	B9J08_001080	.	.	hypothetical protein	.	.	GO:0016020	.	TMH:1
scaffold00005	65214	.	A	G	NON_SYNONYMOUS_CODING	MODERATE	B9J08_001093	C5_02750C_A	.	hypothetical protein	PF07569.6|Hira[TUP1-like enhancer of split];PF09453.5|HIRA_B[HIRA B motif];PF00400.27|WD40[WD domain, G-beta repeat]	.	GO:0005634;GO:0006355;GO:0006351	.	.
scaffold00005	110683	.	C	T	NON_SYNONYMOUS_CODING	MODERATE	B9J08_001118	C6_01170W_A	CIC1	hypothetical protein	PF00687.16|Ribosomal_L1[Ribosomal protein L1p/L10e family]	.	GO:0005730;GO:0000502;GO:0042802;GO:0030674;GO:0030687;GO:0042273;GO:0030163	.	.
scaffold00005	112140	.	G	T	NON_SYNONYMOUS_CODING	MODERATE	B9J08_001119	.	.	hypothetical protein	.	.	.	.	.
scaffold00005	116811	.	G	A	NON_SYNONYMOUS_CODING	MODERATE	B9J08_001121	C7_00510W_A	MAC1	hypothetical protein	PF00649.13|Copper-fist[Copper fist DNA binding domain]	.	GO:0003677;GO:0005634;GO:0006878;GO:0001077;GO:0006366;GO:0005507;GO:0045732;GO:0045944	.	.
scaffold00005	126265	.	C	T	NON_SYNONYMOUS_CODING	MODERATE	B9J08_001125	C6_03840C_A	SNQ2	hypothetical protein	PF00005.22|ABC_tran[ABC transporter];PF12698.2|ABC2_membrane_3[ABC-2 family transporter protein];PF01061.19|ABC2_membrane[ABC-2 type transporter];PF06422.7|PDR_CDR[CDR ABC transporter];PF14510.1|ABC_trans_N[ABC-transporter extracellular N-terminal]	.	GO:0055085;GO:0035690;GO:0005524;GO:0035376;EC:3.6.3.44;GO:0016021;GO:0008559;GO:0005886	.	TMH:11
scaffold00005	130499	.	T	A	NON_SYNONYMOUS_CODING	MODERATE	B9J08_001125	C6_03840C_A	SNQ2	hypothetical protein	PF00005.22|ABC_tran[ABC transporter];PF12698.2|ABC2_membrane_3[ABC-2 family transporter protein];PF01061.19|ABC2_membrane[ABC-2 type transporter];PF06422.7|PDR_CDR[CDR ABC transporter];PF14510.1|ABC_trans_N[ABC-transporter extracellular N-terminal]	.	GO:0055085;GO:0035690;GO:0005524;GO:0035376;EC:3.6.3.44;GO:0016021;GO:0008559;GO:0005886	.	TMH:11
scaffold00005	199689	.	T	A	NON_SYNONYMOUS_CODING	MODERATE	B9J08_001156	C7_00620W_A	GUS1	glutamate-tRNA ligase	TIGR00463[gltX_arch: glutamate--tRNA ligase];PF14497.1|GST_C_3[Glutathione S-transferase, C-terminal domain];PF00043.20|GST_C[Glutathione S-transferase, C-terminal domain];PF03950.13|tRNA-synt_1c_C[tRNA synthetases class I (E and Q), anti-codon binding domain];PF00749.16|tRNA-synt_1c[tRNA synthetases class I (E and Q), catalytic domain]	EC:6.1.1.17[Glutamate--tRNA ligase.]	GO:0005634;GO:0005524;EC:6.1.1.17;GO:0017102;GO:0004818;GO:0005829;GO:0006424;GO:0005739	ko00970[Aminoacyl-tRNA biosynthesis]	.
scaffold00005	220389	.	C	T	NON_SYNONYMOUS_CODING	MODERATE	B9J08_001166	C2_05540C_A	.	hypothetical protein	PF12220.3|U1snRNP70_N[U1 small nuclear ribonucleoprotein of 70kDa MW N terminal];PF14259.1|RRM_6[RNA recognition motif (a.k.a. RRM, RBD, or RNP domain)];PF13893.1|RRM_5[RNA recognition motif. (a.k.a. RRM, RBD, or RNP domain)];PF00076.17|RRM_1[RNA recognition motif. (a.k.a. RRM, RBD, or RNP domain)]	.	GO:0005685;GO:0003729;GO:0000398;GO:0071004;GO:0030619;GO:0005829;GO:0000166;GO:0000243	.	.
scaffold00005	343315	.	G	A	NON_SYNONYMOUS_CODING	MODERATE	B9J08_001226	.	.	hypothetical protein	.	.	.	.	.
scaffold00005	370908	.	G	A	NON_SYNONYMOUS_CODING	MODERATE	B9J08_001239	C1_11770C_A	.	hypothetical protein	PF08546.6|ApbA_C[Ketopantoate reductase PanE/ApbA C terminal]	.	GO:0050661;GO:0055114;GO:0016491	.	.
scaffold00005	392151	.	C	G	NON_SYNONYMOUS_CODING	MODERATE	B9J08_001251	CR_10830C_A	.	hypothetical protein	.	.	GO:0005762;GO:0003735	.	.
scaffold00005	397180	.	G	T	NON_SYNONYMOUS_CODING	MODERATE	B9J08_001254	CR_10800C_A	.	calcium/proton exchanger	PF03733.8|DUF307[Domain of unknown function (DUF307)];PF01699.19|Na_Ca_ex[Sodium/calcium exchanger protein]	.	GO:0070588;GO:0015386;GO:0000329;GO:0035725;GO:0015385;GO:0015369;GO:0016021;GO:0071805;GO:0005789;GO:0006818	.	TMH:14
scaffold00005	427726	.	C	A	NON_SYNONYMOUS_CODING	MODERATE	B9J08_001270	C1_00080C_A	RCA1	hypothetical protein	PF00170.16|bZIP_1[bZIP transcription factor]	.	GO:0006355;GO:0031505;GO:0030447;GO:0043565;GO:0071244;GO:0003700;GO:0000790	.	.
scaffold00005	460346	.	G	T	NON_SYNONYMOUS_CODING	MODERATE	B9J08_001283	C2_01070W_A	.	hypothetical protein	PF06870.7|RNA_pol_I_A49[A49-like RNA polymerase I associated factor]	.	GO:0006362;GO:0003677;GO:0042790;GO:0001054;GO:0005736	ko00240[Pyrimidine metabolism];ko03020[RNA polymerase]	.
scaffold00005	467879	.	T	C	NON_SYNONYMOUS_CODING	MODERATE	B9J08_001286	C2_00700W_A	.	hypothetical protein	PF00004.24|AAA[ATPase family associated with various cellular activities (AAA)];PF01434.13|Peptidase_M41[Peptidase family M41]	EC:3.4.24.-[Metalloendopeptidases.]	EC:3.4.24;GO:0006508;GO:0005524;GO:0004222;GO:0008270;GO:0016021;GO:0005739	.	.
scaffold00005	528035	.	C	T	NON_SYNONYMOUS_CODING	MODERATE	B9J08_001307	C5_00330C_A	.	hypothetical protein	.	.	GO:0051604;GO:0016021;GO:0005739;GO:0006113	.	TMH:1
scaffold00005	537138	.	A	T	NON_SYNONYMOUS_CODING	MODERATE	B9J08_001309	C5_00350C_A	.	hypothetical protein	PF01556.13|CTDII[DnaJ C terminal domain];PF00226.26|DnaJ[DnaJ domain];PF00684.14|DnaJ_CXXCXGXG[DnaJ central domain]	.	GO:0006457;GO:0005783;GO:0005634;GO:0001671;GO:0031072;GO:0031307;GO:0046872;GO:0032781;GO:0051082;GO:0030150	.	.
scaffold00005	548636	.	G	A	NON_SYNONYMOUS_CODING	MODERATE	B9J08_001314	C5_00400C_A	.	hypothetical protein	.	.	.	.	.
scaffold00005	632795	.	A	T	NON_SYNONYMOUS_CODING	MODERATE	B9J08_001357	.	.	hypothetical protein	PF10345.4|Cohesin_load[Cohesin loading factor]	.	GO:0007064	.	.
scaffold00005	658320	.	T	G	NON_SYNONYMOUS_CODING	MODERATE	B9J08_001367	C1_09090C_B	ARG81	hypothetical protein	PF00172.13|Zn_clus[Fungal Zn(2)-Cys(6) binuclear cluster domain];PF11951.3|Fungal_trans_2[Fungal specific transcription factor domain]	.	GO:0045955;GO:0006357;GO:0000981;GO:0005634;GO:0008270;GO:0003712;GO:0000821	.	.
scaffold00005	693909	.	C	T	NON_SYNONYMOUS_CODING	MODERATE	B9J08_001378	C4_04120C_A	.	hypothetical protein	PF03909.12|BSD[BSD domain];PF08567.6|TFIIH_BTF_p62_N[TFIIH p62 subunit, N-terminal domain]	.	GO:0070816;GO:0006360;GO:0032266;GO:0010314;GO:0006366;GO:0006289;GO:0000439;GO:0005675;GO:0005829;GO:0000112	ko03420[Nucleotide excision repair]	.
scaffold00005	720583	.	A	G	NON_SYNONYMOUS_CODING	MODERATE	B9J08_001391	C4_02150C_A	.	hypothetical protein	.	.	.	.	.
scaffold00005	766825	.	C	T	NON_SYNONYMOUS_CODING	MODERATE	B9J08_001415	C4_02960W_A	.	hypothetical protein	.	EC:6.3.2.19[Ubiquitin--protein ligase.]	GO:0008270	.	.
scaffold00005	808392	.	A	T	NON_SYNONYMOUS_CODING	MODERATE	B9J08_001434	C6_02770W_A	MRT4	hypothetical protein	PF00466.15|Ribosomal_L10[Ribosomal protein L10]	.	GO:0005840;GO:0005654;GO:0035690;GO:0000027;GO:0030687;GO:0006364;GO:0005730;GO:0000956	.	.
scaffold00005	826197	.	T	G	NON_SYNONYMOUS_CODING	MODERATE	B9J08_001443	CR_05920C_A	MHP1	hypothetical protein	PF13516.1|LRR_6[Leucine Rich repeat]	.	GO:0005874;GO:0031505;GO:0007026;GO:0005200	.	.
scaffold00005	879188	.	G	A	NON_SYNONYMOUS_CODING	MODERATE	B9J08_001463	C5_01650C_A	MYO1	hypothetical protein	PF00063.16|Myosin_head[Myosin head (motor domain)]	.	GO:0000915;GO:0005524;GO:0000142;GO:0003774;GO:0000131;GO:0000916;GO:0016460	ko05416[Viral myocarditis]	.
scaffold00005	897077	.	A	G	NON_SYNONYMOUS_CODING	MODERATE	B9J08_001469	C1_11440C_A	GIN1	hypothetical protein	PF09444.5|MRC1[MRC1-like domain]	.	GO:0030466;GO:0000781;GO:0006281;GO:0033262;GO:0048478;GO:0006348;GO:0000076;GO:0031573;GO:0031298;GO:0043570;GO:0007064;GO:0000723	.	.
scaffold00005	909360	.	T	A	NON_SYNONYMOUS_CODING	MODERATE	B9J08_001475	C5_05360C_A	.	hypothetical protein	PF00150.13|Cellulase[Cellulase (glycosyl hydrolase family 5)]	.	GO:0004553;GO:0005975	.	.
scaffold00005	913173	.	C	G	NON_SYNONYMOUS_CODING	MODERATE	B9J08_001476	C5_05370C_A	PRP22	hypothetical protein	PF00271.26|Helicase_C[Helicase conserved C-terminal domain];PF00575.18|S1[S1 RNA binding domain];PF04408.18|HA2[Helicase associated domain (HA2)];PF00270.24|DEAD[DEAD/DEAH box helicase];PF07717.11|OB_NTP_bind[Oligonucleotide/oligosaccharide-binding (OB)-fold]	EC:3.6.4.13[RNA helicase.]	GO:0071007;GO:0000350;GO:0005524;GO:0004004;GO:0071021;GO:0000390;GO:0003676	.	.
scaffold00005	913989	.	T	A	NON_SYNONYMOUS_CODING	MODERATE	B9J08_001476	C5_05370C_A	PRP22	hypothetical protein	PF00271.26|Helicase_C[Helicase conserved C-terminal domain];PF00575.18|S1[S1 RNA binding domain];PF04408.18|HA2[Helicase associated domain (HA2)];PF00270.24|DEAD[DEAD/DEAH box helicase];PF07717.11|OB_NTP_bind[Oligonucleotide/oligosaccharide-binding (OB)-fold]	EC:3.6.4.13[RNA helicase.]	GO:0071007;GO:0000350;GO:0005524;GO:0004004;GO:0071021;GO:0000390;GO:0003676	.	.
scaffold00005	919477	.	A	T	NON_SYNONYMOUS_CODING	MODERATE	B9J08_001480	.	.	hypothetical protein	.	.	.	.	.
scaffold00005	924139	.	T	C	NON_SYNONYMOUS_CODING	MODERATE	B9J08_001481	.	.	hypothetical protein	.	.	.	.	TMH:4
scaffold00005	924695	.	T	A	NON_SYNONYMOUS_CODING	MODERATE	B9J08_001481	.	.	hypothetical protein	.	.	.	.	TMH:4
scaffold00005	945862	.	C	T	NON_SYNONYMOUS_CODING	MODERATE	B9J08_001489	CR_02400W_A	PHO112	hypothetical protein	PF00328.17|His_Phos_2[Histidine phosphatase superfamily (branch 2)]	.	GO:0003993;GO:0016311;EC:3.1.3.2	.	.
scaffold00005	969334	.	A	G	NON_SYNONYMOUS_CODING	MODERATE	B9J08_001499	C2_08050C_A	SIT1	hypothetical protein	PF07690.11|MFS_1[Major Facilitator Superfamily];PF00083.19|Sugar_tr[Sugar (and other) transporter]	.	GO:0055085;GO:0016021	.	TMH:12
scaffold00005	1009856	.	T	A	NON_SYNONYMOUS_CODING	MODERATE	B9J08_001517	.	.	hypothetical protein	.	.	.	.	.
scaffold00008	157412	.	T	C	NON_SYNONYMOUS_CODING	MODERATE	B9J08_001597	C1_07790C_A	.	hypothetical protein	PF14617.1|CMS1[U3-containing 90S pre-ribosomal complex subunit]	.	GO:0030686	.	.
scaffold00008	194130	.	A	T	NON_SYNONYMOUS_CODING	MODERATE	B9J08_001615	C1_07420C_A	PEX3	hypothetical protein	PF04882.7|Peroxin-3[Peroxin-3]	.	GO:0005779;GO:0045033;GO:0005783;GO:0032581;GO:0030674;GO:0045046	.	TMH:1
scaffold00008	222372	.	G	C	NON_SYNONYMOUS_CODING	MODERATE	B9J08_001627	C6_02630C_A	.	hypothetical protein	PF02204.13|VPS9[Vacuolar sorting protein 9 (VPS9) domain];PF02845.11|CUE[CUE domain]	.	GO:0032511;GO:0036010;GO:0006895;GO:0043547;GO:0005085;GO:0043130;GO:0006623;GO:0005829;GO:0000011	.	.
scaffold00008	224144	.	A	T	NON_SYNONYMOUS_CODING	MODERATE	B9J08_001630	C6_02620C_A	.	hypothetical protein	PF06249.7|EutQ[Ethanolamine utilisation protein EutQ];PF05899.7|Cupin_3[Protein of unknown function (DUF861)];PF07883.6|Cupin_2[Cupin domain]	.	.	.	.
scaffold00008	314784	.	T	G	NON_SYNONYMOUS_CODING	MODERATE	B9J08_001677	C6_00300C_A	STV1	hypothetical protein	PF01496.14|V_ATPase_I[V-type ATPase 116kDa subunit family]	EC:3.6.3.14[H(+)-transporting two-sector ATPase.]	GO:0015991;GO:0000220;GO:0005770;GO:0005794;GO:0016021;GO:0007035;GO:0046961	ko04966[Collecting duct acid secretion];ko04142[Lysosome];ko05323[Rheumatoid arthritis];ko04145[Phagosome];ko05110[Vibrio cholerae infection];ko05120[Epithelial cell signaling in Helicobacter pylori infection]	TMH:7
scaffold00008	386844	.	G	T	NON_SYNONYMOUS_CODING	MODERATE	B9J08_001708	C5_00030W_A	.	hypothetical protein	PF00687.16|Ribosomal_L1[Ribosomal protein L1p/L10e family]	.	GO:0015934;GO:0005739	.	.
scaffold00008	400725	.	G	C	NON_SYNONYMOUS_CODING	MODERATE	B9J08_001715	C3_04220C_A	URK1	uridine kinase	TIGR00235[udk: uridine kinase];PF13238.1|AAA_18[AAA domain];PF00485.13|PRK[Phosphoribulokinase / Uridine kinase family];PF14681.1|UPRTase[Uracil phosphoribosyltransferase]	EC:2.7.1.48[Uridine kinase.]	GO:0016020;GO:0044424;GO:0046132;GO:0010138;GO:0016301;GO:0000166;GO:0043097	ko00983[Drug metabolism - other enzymes]	.
scaffold00008	412897	.	T	C	NON_SYNONYMOUS_CODING	MODERATE	B9J08_001722	C1_12150C_A	.	hypothetical protein	PF07855.7|DUF1649[Protein of unknown function (DUF1649)]	.	GO:0044424	.	.
scaffold00008	413701	.	G	C	NON_SYNONYMOUS_CODING	MODERATE	B9J08_001723	C1_08820C_A	.	peptidyl-tRNA hydrolase	PF01195.14|Pept_tRNA_hydro[Peptidyl-tRNA hydrolase]	EC:3.1.1.29[Aminoacyl-tRNA hydrolase.]	.	.	.
scaffold00008	413910	.	G	A	NON_SYNONYMOUS_CODING	MODERATE	B9J08_001723	C1_08820C_A	.	peptidyl-tRNA hydrolase	PF01195.14|Pept_tRNA_hydro[Peptidyl-tRNA hydrolase]	EC:3.1.1.29[Aminoacyl-tRNA hydrolase.]	.	.	.
scaffold00008	425387	.	T	C	NON_SYNONYMOUS_CODING	MODERATE	B9J08_001729	C3_04770C_A	ZCF32	hypothetical protein	PF11951.3|Fungal_trans_2[Fungal specific transcription factor domain]	.	GO:0006355	.	.
scaffold00008	427190	.	A	G	NON_SYNONYMOUS_CODING	MODERATE	B9J08_001730	C3_04760C_A	SEN1	hypothetical protein	PF13086.1|AAA_11[AAA domain];PF13245.1|AAA_19[Part of AAA domain];PF13087.1|AAA_12[AAA domain];PF12726.2|SEN1_N[SEN1 N terminal]	EC:3.6.4.-[Acting on acid anhydrides; involved in cellular and subcellular movement.]	GO:0034470;GO:0031123;GO:0044424;GO:0034645	.	.
scaffold00008	440574	.	G	A	NON_SYNONYMOUS_CODING	MODERATE	B9J08_001734	C1_04480C_A	TUS1	hypothetical protein	PF15405.1|PH_5[Pleckstrin homology domain];PF00169.24|PH[PH domain];PF00780.17|CNH[CNH domain]	.	GO:0065007	.	.
scaffold00008	465939	.	G	A	NON_SYNONYMOUS_CODING	MODERATE	B9J08_001746	.	.	hypothetical protein	.	.	.	.	.
scaffold00008	476306	.	G	A	NON_SYNONYMOUS_CODING	MODERATE	B9J08_001748	C3_07560W_A	TCC1	hypothetical protein	PF00515.23|TPR_1[Tetratricopeptide repeat];PF13181.1|TPR_8[Tetratricopeptide repeat];PF14559.1|TPR_19[Tetratricopeptide repeat];PF07719.12|TPR_2[Tetratricopeptide repeat]	.	GO:0000122;GO:0005634;GO:0071467;GO:0009405;GO:0036177	.	.
scaffold00008	479882	.	T	C	NON_SYNONYMOUS_CODING	MODERATE	B9J08_001752	.	.	hypothetical protein	PF01546.23|Peptidase_M20[Peptidase family M20/M25/M40];PF07687.9|M20_dimer[Peptidase dimerisation domain]	.	GO:0006508;GO:0008237	.	TMH:1
scaffold00008	530636	.	G	C	NON_SYNONYMOUS_CODING	MODERATE	B9J08_001774	C2_02490C_A	.	hypothetical protein	PF13246.1|Hydrolase_like2[Putative hydrolase of sodium-potassium ATPase alpha subunit];TIGR01657[P-ATPase-V: P-type ATPase of unknown pump specificity (type V)];PF00702.21|Hydrolase[haloacid dehalogenase-like hydrolase];PF12409.3|P5-ATPase[P5-type ATPase cation transporter];PF12710.2|HAD[haloacid dehalogenase-like hydrolase];PF00122.15|E1-E2_ATPase[E1-E2 ATPase]	EC:3.6.3.-[Acting on acid anhydrides; catalyzing transmembrane movement of substances.]	GO:0046872;GO:0005783;GO:0005524;GO:0016021;EC:3.6.1.3;GO:0006812;GO:0016887	.	TMH:11
scaffold00008	553662	.	A	T	NON_SYNONYMOUS_CODING	MODERATE	B9J08_001786	C4_02530W_A	ARG83	hypothetical protein	PF00172.13|Zn_clus[Fungal Zn(2)-Cys(6) binuclear cluster domain];PF11951.3|Fungal_trans_2[Fungal specific transcription factor domain]	.	.	.	.
scaffold00008	559293	.	A	C	NON_SYNONYMOUS_CODING	MODERATE	B9J08_001787	C4_02540W_A	RGT1	hypothetical protein	PF00172.13|Zn_clus[Fungal Zn(2)-Cys(6) binuclear cluster domain]	.	.	.	.
scaffold00008	560708	.	T	C	NON_SYNONYMOUS_CODING	MODERATE	B9J08_001787	C4_02540W_A	RGT1	hypothetical protein	PF00172.13|Zn_clus[Fungal Zn(2)-Cys(6) binuclear cluster domain]	.	.	.	.
scaffold00008	570352	.	G	T	NON_SYNONYMOUS_CODING	MODERATE	B9J08_001793	CR_06900C_A	ALG6	hypothetical protein	PF03155.10|Alg6_Alg8[ALG6, ALG8 glycosyltransferase family]	EC:2.4.1.267[Dol-P-Glc:Man(9)GlcNAc(2)-PP-Dol alpha-1->3-glucosyltransferase.]	GO:0005783;GO:1901137;GO:0044238;GO:0016758;GO:0044425;GO:0044237	.	TMH:10
scaffold00008	576871	.	T	A	NON_SYNONYMOUS_CODING	MODERATE	B9J08_001797	C6_01050W_A	.	tyrosine-tRNA ligase	TIGR00234[tyrS: tyrosine--tRNA ligase];PF00579.20|tRNA-synt_1b[tRNA synthetases class I (W and Y)]	EC:6.1.1.1[Tyrosine--tRNA ligase.]	GO:0070184;GO:0003723;GO:0005524;EC:6.1.1.1;GO:0004831;GO:0005739	.	.
scaffold00008	636923	.	C	T	NON_SYNONYMOUS_CODING	MODERATE	B9J08_001827	C1_06210W_A	BUD16	pyridoxal kinase	TIGR00687[pyridox_kin: pyridoxal kinase];PF00294.19|PfkB[pfkB family carbohydrate kinase];PF08543.7|Phos_pyr_kin[Phosphomethylpyrimidine kinase]	EC:2.7.1.35[Pyridoxal kinase.]	GO:0042823;GO:0016740	.	.
scaffold00008	639895	.	G	C	NON_SYNONYMOUS_CODING	MODERATE	B9J08_001829	C1_05980W_A	.	hypothetical protein	PF00454.22|PI3_PI4_kinase[Phosphatidylinositol 3- and 4-kinase]	.	GO:0070783;GO:0070786;GO:0044464	.	.
scaffold00008	658182	.	G	C	NON_SYNONYMOUS_CODING	MODERATE	B9J08_001837	CR_03950W_A	.	hypothetical protein	PF01765.14|RRF[Ribosome recycling factor]	.	GO:0032543;GO:0005739	.	.
scaffold00008	694433	.	T	C	NON_SYNONYMOUS_CODING	MODERATE	B9J08_001857	C6_00780W_A	SEC8	hypothetical protein	PF04048.9|Sec8_exocyst[Sec8 exocyst complex component specific domain]	.	GO:0044424;GO:0010256;GO:0030427;GO:0048308;GO:0006887;GO:0005933	.	.
scaffold00008	696860	.	C	G	NON_SYNONYMOUS_CODING	MODERATE	B9J08_001858	C6_00770C_A	.	hypothetical protein	PF02732.10|ERCC4[ERCC4 domain]	.	GO:0016787;GO:0006259	.	.
scaffold00008	711835	.	G	C	NON_SYNONYMOUS_CODING	MODERATE	B9J08_001866	C6_00690W_A	.	hypothetical protein	.	.	.	.	.
scaffold00008	837376	.	A	T	NON_SYNONYMOUS_CODING	MODERATE	B9J08_001924	C6_02260C_A	SEC27	hypothetical protein	PF04053.9|Coatomer_WDAD[Coatomer WD associated region];PF00400.27|WD40[WD domain, G-beta repeat]	.	GO:0032511;GO:0005634;GO:0030126;GO:0019028;GO:0006890;GO:0006886;GO:0043130;GO:0005829;GO:0005198;GO:0006888	.	.
scaffold00010	65412	.	A	C	NON_SYNONYMOUS_CODING	MODERATE	B9J08_001971	CR_04830C_A	.	hypothetical protein	PF12632.2|Vezatin[Mysoin-binding motif of peroxisomes]	.	GO:0017022	.	.
scaffold00010	75077	.	T	A	NON_SYNONYMOUS_CODING	MODERATE	B9J08_001974	CR_04810W_A	RPS3	40S ribosomal protein S3	TIGR01008[rpsC_E_A: ribosomal protein S3];PF07650.12|KH_2[KH domain];PF00189.15|Ribosomal_S3_C[Ribosomal protein S3, C-terminal domain]	.	GO:0003906;GO:0003723;GO:0006407;GO:0000056;EC:4.2.99.18;GO:0006412;GO:0030688;GO:0022627;GO:0003735;GO:0000737	.	.
scaffold00010	113457	.	T	C	NON_SYNONYMOUS_CODING	MODERATE	B9J08_001996	C3_05640W_A	.	hypothetical protein	PF02668.11|TauD[Taurine catabolism dioxygenase TauD, TfdA family]	.	GO:0055114;GO:0051213	.	.
scaffold00010	167079	.	C	A	NON_SYNONYMOUS_CODING	MODERATE	B9J08_002023	.	.	hypothetical protein	PF09494.5|Slx4[Slx4 endonuclease]	.	GO:0006281;GO:0006260;GO:0033557;GO:0090305;GO:0017108	.	.
scaffold00010	205857	.	A	G	NON_SYNONYMOUS_CODING	MODERATE	B9J08_002041	C4_00970C_A	MDN1	hypothetical protein	PF00004.24|AAA[ATPase family associated with various cellular activities (AAA)];PF07728.9|AAA_5[AAA domain (dynein-related subfamily)];PF07726.6|AAA_3[ATPase family associated with various cellular activities (AAA)]	.	GO:0042254;GO:0005634;GO:0000166;GO:0009987;GO:0044446	.	.
scaffold00010	293888	.	T	A	NON_SYNONYMOUS_CODING	MODERATE	B9J08_002080	CR_07960C_A	TRK1	hypothetical protein	PF02386.11|TrkH[Cation transport protein]	.	GO:0030007;GO:0005887;GO:0071805;GO:0015079	.	TMH:8
scaffold00010	322069	.	A	G	NON_SYNONYMOUS_CODING	MODERATE	B9J08_002094	C3_05880C_A	.	hypothetical protein	PF14259.1|RRM_6[RNA recognition motif (a.k.a. RRM, RBD, or RNP domain)];PF13893.1|RRM_5[RNA recognition motif. (a.k.a. RRM, RBD, or RNP domain)];PF00076.17|RRM_1[RNA recognition motif. (a.k.a. RRM, RBD, or RNP domain)]	.	GO:0010494;GO:0034063;GO:0003729;GO:0005634;GO:0000184;GO:0000932;GO:0000166;GO:0008266;GO:0043488	.	.
scaffold00010	326477	.	C	A	NON_SYNONYMOUS_CODING	MODERATE	B9J08_002096	C3_05780C_A	CRZ1	hypothetical protein	PF13894.1|zf-C2H2_4[C2H2-type zinc finger];PF00096.21|zf-C2H2[Zinc finger, C2H2 type];PF12874.2|zf-met[Zinc-finger of C2H2 type];PF13465.1|zf-H2C2_2[Zinc-finger double domain]	.	GO:0061423;GO:0006038;GO:2001040;GO:0061400;GO:0071483;GO:0001077;GO:0005737;GO:1900622;GO:0097301;GO:0071496;GO:0000987;GO:0061422;GO:0005634;GO:0061404;GO:0006366;GO:0046872;GO:1900430;GO:0042594;GO:0007329;GO:0044182	.	.
scaffold00010	342339	.	A	T	NON_SYNONYMOUS_CODING	MODERATE	B9J08_002105	C1_14300C_A	NCR1	hypothetical protein	PF02460.13|Patched[Patched family];PF12349.3|Sterol-sensing[Sterol-sensing domain of SREBP cleavage-activation]	.	GO:0000329;GO:0006665;GO:0006869;GO:0016021;GO:0046624	.	TMH:12
scaffold00010	345672	.	C	T	NON_SYNONYMOUS_CODING	MODERATE	B9J08_002106	C1_14310W_A	.	hypothetical protein	PF00383.17|dCMP_cyt_deam_1[Cytidine and deoxycytidylate deaminase zinc-binding region]	EC:3.5.4.12[dCMP deaminase.]	EC:3.5.4.12;GO:0004132;GO:0005634;GO:0006231;GO:0005829;GO:0008270;GO:0006226	.	.
scaffold00010	365610	.	C	T	NON_SYNONYMOUS_CODING	MODERATE	B9J08_002114	C7_03650W_A	.	hypothetical protein	PF02811.14|PHP[PHP domain]	EC:3.1.3.15[Histidinol-phosphatase.]	GO:0004401;GO:0005634;EC:3.1.3.15;GO:0000105;GO:0005829;GO:0016311	.	.
scaffold00010	431136	.	C	T	NON_SYNONYMOUS_CODING	MODERATE	B9J08_002142	C7_02380C_A	CYP1	peptidyl-prolyl cis-trans isomerase	PF00160.16|Pro_isomerase[Cyclophilin type peptidyl-prolyl cis-trans isomerase/CLD]	EC:5.2.1.8[Peptidylprolyl isomerase.]	GO:0006457;GO:0003755;GO:0005783;GO:0030437;GO:0005758;GO:0045836;EC:5.2.1.8;GO:0005794;GO:0034967;GO:0000413;GO:0016018;GO:0016575	.	.
scaffold00010	453175	.	C	T	NON_SYNONYMOUS_CODING	MODERATE	B9J08_002150	CR_01000C_A	SLN1	hypothetical protein	PF00512.20|HisKA[His Kinase A (phospho-acceptor) domain];PF00072.19|Response_reg[Response regulator receiver domain];PF02518.21|HATPase_c[Histidine kinase-, DNA gyrase B-, and HSP90-like ATPase]	EC:2.7.13.3[Histidine kinase.]	GO:0023014;GO:0018106;GO:0005622;GO:0046777;GO:0000155;GO:0006469;GO:0005887;GO:0005034;GO:0009927;GO:0007234	.	TMH:3
scaffold00010	461740	.	G	A	NON_SYNONYMOUS_CODING	MODERATE	B9J08_002155	CR_00690C_A	.	hypothetical protein	PF13015.1|PRKCSH_1[Glucosidase II beta subunit-like protein];PF12999.2|PRKCSH-like[Glucosidase II beta subunit-like]	.	GO:0005788;EC:3.2.1.20;GO:0017177;GO:0006487;GO:0000271;GO:0004558;GO:0006491	.	.
scaffold00010	478427	.	A	C	NON_SYNONYMOUS_CODING	MODERATE	B9J08_002166	C6_00250W_A	.	hypothetical protein	PF12697.2|Abhydrolase_6[Alpha/beta hydrolase family];PF10329.4|DUF2417[Region of unknown function (DUF2417)]	.	GO:0000324;GO:0016021	.	TMH:5
scaffold00010	534286	.	A	G	NON_SYNONYMOUS_CODING	MODERATE	B9J08_002189	C2_00510W_A	.	hypothetical protein	PF13242.1|Hydrolase_like[HAD-hyrolase-like];PF13419.1|HAD_2[Haloacid dehalogenase-like hydrolase]	.	GO:0005634;GO:0005829	.	.
scaffold00010	563525	.	G	A	NON_SYNONYMOUS_CODING	MODERATE	B9J08_002201	C2_00600C_A	.	hypothetical protein	PF01106.12|NifU[NifU-like domain];PF08712.6|Nfu_N[Scaffold protein Nfu/NifU N terminal]	.	GO:0015986;GO:0005759;GO:0016226;GO:0005506;GO:0045263;GO:0015078;GO:0051536;GO:0006880	.	.
scaffold00010	566804	.	T	A	NON_SYNONYMOUS_CODING	MODERATE	B9J08_002202	C4_01940W_A	PHO89	hypothetical protein	PF01384.15|PHO4[Phosphate transporter family]	.	GO:0035725;GO:0015319;GO:0042802;GO:0048249;GO:0005315;GO:0016021;GO:0035435;GO:0005886	.	TMH:9
scaffold00010	566902	.	A	C	NON_SYNONYMOUS_CODING	MODERATE	B9J08_002202	C4_01940W_A	PHO89	hypothetical protein	PF01384.15|PHO4[Phosphate transporter family]	.	GO:0035725;GO:0015319;GO:0042802;GO:0048249;GO:0005315;GO:0016021;GO:0035435;GO:0005886	.	TMH:9
scaffold00010	621103	.	G	A	NON_SYNONYMOUS_CODING	MODERATE	B9J08_002229	C4_06540W_B	MNN4	hypothetical protein	PF04991.8|LicD[LicD family]	.	.	.	TMH:1
scaffold00009	146421	.	C	T	NON_SYNONYMOUS_CODING	MODERATE	B9J08_002297	C5_03060C_A	TNA1	hypothetical protein	PF07690.11|MFS_1[Major Facilitator Superfamily]	.	GO:0055085;GO:0016021	.	TMH:11
scaffold00009	154444	.	T	C	NON_SYNONYMOUS_CODING	MODERATE	B9J08_002299	C1_06800W_A	.	hypothetical protein	PF08652.6|RAI1[RAI1 like PD-(D/E)XK nuclease]	.	GO:1990174;GO:0005634;GO:0031087;GO:0000466;GO:0030234;GO:0050790;GO:0071035;GO:0030846;GO:0005829;GO:0090502;GO:0034353;GO:0000463	.	.
scaffold00009	165233	.	C	T	NON_SYNONYMOUS_CODING	MODERATE	B9J08_002304	C1_09320C_A	.	hypothetical protein	.	.	.	.	.
scaffold00009	202212	.	T	C	NON_SYNONYMOUS_CODING	MODERATE	B9J08_002321	C1_03230C_A	ARX1	hypothetical protein	PF00557.19|Peptidase_M24[Metallopeptidase family M24]	EC:3.-.-.-[Hydrolases.]	GO:0000055;GO:0005654;GO:0008233;GO:0005730;GO:0005635;GO:0022625;GO:0030687;GO:0042273	.	.
scaffold00009	202399	.	C	G	NON_SYNONYMOUS_CODING	MODERATE	B9J08_002321	C1_03230C_A	ARX1	hypothetical protein	PF00557.19|Peptidase_M24[Metallopeptidase family M24]	EC:3.-.-.-[Hydrolases.]	GO:0000055;GO:0005654;GO:0008233;GO:0005730;GO:0005635;GO:0022625;GO:0030687;GO:0042273	.	.
scaffold00009	237075	.	A	G	NON_SYNONYMOUS_CODING	MODERATE	B9J08_002339	C5_01600C_A	SPB4	hypothetical protein	PF00271.26|Helicase_C[Helicase conserved C-terminal domain];PF13959.1|DUF4217[Domain of unknown function (DUF4217)];PF00270.24|DEAD[DEAD/DEAH box helicase]	EC:3.6.4.13[RNA helicase.]	GO:0003723;GO:0030686;GO:0005654;GO:0005524;GO:0000027;GO:0008026;GO:0000470;GO:0005730;GO:1902626	.	.
scaffold00009	256115	.	A	G	NON_SYNONYMOUS_CODING	MODERATE	B9J08_002346	C3_03250W_A	.	hypothetical protein	PF13246.1|Hydrolase_like2[Putative hydrolase of sodium-potassium ATPase alpha subunit];PF00702.21|Hydrolase[haloacid dehalogenase-like hydrolase];PF12710.2|HAD[haloacid dehalogenase-like hydrolase];PF00122.15|E1-E2_ATPase[E1-E2 ATPase]	.	GO:0000287;EC:3.6.3.1;GO:0045332;GO:0005524;GO:0016021;GO:0004012	.	TMH:10
scaffold00009	275811	.	C	G	NON_SYNONYMOUS_CODING	MODERATE	B9J08_002354	C3_01200W_B	UTP20	hypothetical protein	PF07539.7|DRIM[Down-regulated in metastasis]	.	GO:0030686;GO:0005654;GO:0000472;GO:0000447;GO:0005737;GO:0000480;GO:0005730;GO:0032040;GO:0030688	.	.
scaffold00009	286149	.	A	T	NON_SYNONYMOUS_CODING	MODERATE	B9J08_002356	.	.	hypothetical protein	.	.	.	.	.
scaffold00009	317145	.	A	G	NON_SYNONYMOUS_CODING	MODERATE	B9J08_002373	.	.	hypothetical protein	PF04603.7|Mog1[Ran-interacting Mog1 protein]	.	GO:0016973;GO:0005634;GO:0008536;GO:0005829;GO:0006606	.	.
scaffold00009	323433	.	T	G	NON_SYNONYMOUS_CODING	MODERATE	B9J08_002377	C1_09420W_A	LIP2	hypothetical protein	PF03583.9|LIP[Secretory lipase]	.	EC:3.1.1.3;GO:0016042;GO:0004806;GO:0016021	.	.
scaffold00009	329034	.	A	T	NON_SYNONYMOUS_CODING	MODERATE	B9J08_002380	C6_01370W_A	.	hypothetical protein	PF08320.7|PIG-X[PIG-X / PBN1]	.	GO:0097502;GO:0006506;GO:0016485;GO:0030433;GO:0016021;GO:0005789	.	TMH:1
scaffold00009	345023	.	G	T	NON_SYNONYMOUS_CODING	MODERATE	B9J08_002389	C3_06510C_A	HST6	hypothetical protein	PF00005.22|ABC_tran[ABC transporter];PF00664.18|ABC_membrane[ABC transporter transmembrane region]	.	GO:0055085;GO:0005524;GO:0042626;GO:0016021	.	TMH:6
scaffold00009	417273	.	T	G	NON_SYNONYMOUS_CODING	MODERATE	B9J08_002421	C3_04820C_A	SEC7	hypothetical protein	PF12783.2|Sec7_N[Guanine nucleotide exchange factor in Golgi transport N-terminal];PF09324.5|DUF1981[Domain of unknown function (DUF1981)];PF01369.15|Sec7[Sec7 domain]	.	GO:0032012;GO:0043547;GO:0005086	.	.
scaffold00009	426693	.	A	C	NON_SYNONYMOUS_CODING	MODERATE	B9J08_002424	C2_09020W_A	CDC47	hypothetical protein	PF01078.16|Mg_chelatase[Magnesium chelatase, subunit ChlI];PF00493.18|MCM[MCM2/3/5 family];PF07728.9|AAA_5[AAA domain (dynein-related subfamily)];PF14551.1|MCM_N[MCM N-terminal domain]	.	GO:0003688;GO:0000781;GO:0005524;GO:0006268;GO:1990518;GO:0005737;GO:0033679;GO:0006357;GO:0003697;GO:0031298;GO:0009378;GO:0003682;GO:0005656;GO:0042555;GO:0003712;GO:0003727;GO:0030466;GO:0000727;GO:0003724;GO:0006270;GO:0006348;GO:0006271;GO:0000790;GO:0031261;GO:0006267;GO:0097373	ko04113[Meiosis - yeast];ko04111[Cell cycle - yeast];ko04110[Cell cycle]	.
scaffold00009	439912	.	A	T	NON_SYNONYMOUS_CODING	MODERATE	B9J08_002432	C2_08960C_A	.	hypothetical protein	.	.	GO:0097271;GO:0005935;GO:0005737	.	.
scaffold00009	526925	.	C	G	NON_SYNONYMOUS_CODING	MODERATE	B9J08_002467	C2_05270W_A	.	hypothetical protein	PF13513.1|HEAT_EZ[HEAT-like repeat]	.	GO:0005635;GO:1990023;GO:0005934;GO:0005935;GO:0042991;GO:0008139;GO:0006886;GO:0034399;GO:0008536;GO:0010458;GO:0006609;GO:0005829	.	.
scaffold00009	531884	.	T	C	NON_SYNONYMOUS_CODING	MODERATE	B9J08_002469	CR_01330W_A	CPA2	carbamoyl-phosphate synthase arginine-specific large chain	TIGR01369[CPSaseII_lrg: carbamoyl-phosphate synthase, large subunit];PF07478.8|Dala_Dala_lig_C[D-ala D-ala ligase C-terminus];PF00289.17|CPSase_L_chain[Carbamoyl-phosphate synthase L chain, N-terminal domain];PF02787.14|CPSase_L_D3[Carbamoyl-phosphate synthetase large chain, oligomerisation domain];PF13535.1|ATP-grasp_4[ATP-grasp domain];PF02786.12|CPSase_L_D2[Carbamoyl-phosphate synthase L chain…	EC:6.3.5.5[Carbamoyl-phosphate synthase (glutamine-hydrolyzing).]	GO:0006541;GO:0046872;GO:0005524;GO:0016740;GO:0005739;GO:0004088;EC:6.3.5.5	ko00250[Alanine, aspartate and glutamate metabolism]	.
scaffold00009	551524	.	A	G	NON_SYNONYMOUS_CODING	MODERATE	B9J08_002479	C2_07070W_A	.	hypothetical protein	PF00107.21|ADH_zinc_N[Zinc-binding dehydrogenase];PF08240.7|ADH_N[Alcohol dehydrogenase GroES-like domain];PF13602.1|ADH_zinc_N_2[Zinc-binding dehydrogenase]	EC:1.6.5.5[NADPH:quinone reductase.]	GO:0032440;GO:0005634;GO:0017091;EC:1.3.1.74;GO:0055114;GO:0005829;GO:0034599;EC:1.6.5.5;GO:0008270;GO:0003960	.	.
scaffold00009	585211	.	G	A	NON_SYNONYMOUS_CODING	MODERATE	B9J08_002492	C5_03040W_A	.	hypothetical protein	.	.	.	.	.
scaffold00009	591320	.	A	G	NON_SYNONYMOUS_CODING	MODERATE	B9J08_002494	C5_03760C_A	MTR10	hypothetical protein	PF08389.7|Xpo1[Exportin 1-like protein]	.	GO:0005635;GO:0008139;GO:0006886;GO:0008536;GO:0005829;GO:0006609;GO:0006404;GO:0051031	.	.
scaffold00009	649823	.	T	C	NON_SYNONYMOUS_CODING	MODERATE	B9J08_002524	C4_05880W_A	GAT1	hypothetical protein	PF08550.5|DUF1752[Fungal protein of unknown function (DUF1752)];PF00320.22|GATA[GATA zinc finger]	.	GO:0006355;GO:0043565;GO:0008270;GO:0003700	.	.
scaffold00009	715387	.	C	T	NON_SYNONYMOUS_CODING	MODERATE	B9J08_002550	C5_02230W_A	.	hypothetical protein	PF00227.21|Proteasome[Proteasome subunit]	EC:3.4.25.1[Proteasome endopeptidase complex.]	GO:0043248;GO:0005634;GO:0004298;GO:0010499;GO:0034515;GO:0043161;GO:0019774;EC:3.4.25	.	.
scaffold00009	718716	.	A	C	NON_SYNONYMOUS_CODING	MODERATE	B9J08_002553	C5_02210W_A	.	hypothetical protein	PF04190.8|DUF410[Protein of unknown function (DUF410)]	.	GO:0005634;GO:0006620;GO:0045048;GO:0072380	.	.
scaffold00009	724018	.	C	A	NON_SYNONYMOUS_CODING	MODERATE	B9J08_002557	C4_06540W_B	MNN4	hypothetical protein	PF04991.8|LicD[LicD family]	.	.	.	.
scaffold00009	772867	.	C	T	NON_SYNONYMOUS_CODING	MODERATE	B9J08_002583	C7_02000C_A	.	hypothetical protein	PF07690.11|MFS_1[Major Facilitator Superfamily];PF12832.2|MFS_1_like[MFS_1 like family]	.	GO:0055085;GO:0016021	.	TMH:9
scaffold00001	34112	.	C	G	NON_SYNONYMOUS_CODING	MODERATE	B9J08_002604	CR_10470C_A	.	hypothetical protein	PF08164.7|TRAUB[Apoptosis-antagonizing transcription factor, C-terminal];PF13339.1|AATF-Che1[Apoptosis antagonizing transcription factor]	.	GO:0000462;GO:0030686;GO:0032040;GO:0005730	.	.
scaffold00001	34487	.	T	A	NON_SYNONYMOUS_CODING	MODERATE	B9J08_002604	CR_10470C_A	.	hypothetical protein	PF08164.7|TRAUB[Apoptosis-antagonizing transcription factor, C-terminal];PF13339.1|AATF-Che1[Apoptosis antagonizing transcription factor]	.	GO:0000462;GO:0030686;GO:0032040;GO:0005730	.	.
scaffold00001	68067	.	T	C	NON_SYNONYMOUS_CODING	MODERATE	B9J08_002617	C3_00980W_A	FLC1	hypothetical protein	PF14558.1|TRP_N[ML-like domain];PF06011.7|TRP[Transient receptor potential (TRP) ion channel]	.	GO:0016021	.	TMH:9
scaffold00001	81857	.	C	A	NON_SYNONYMOUS_CODING	MODERATE	B9J08_002623	C3_01070C_A	.	hypothetical protein	.	.	GO:0006457;GO:0007021	.	.
scaffold00001	103808	.	A	C	NON_SYNONYMOUS_CODING	MODERATE	B9J08_002634	C3_02260C_A	.	hypothetical protein	PF00069.20|Pkinase[Protein kinase domain];PF07714.12|Pkinase_Tyr[Protein tyrosine kinase]	EC:2.7.11.23[[RNA-polymerase]-subunit kinase.];EC:2.7.11.22[Cyclin-dependent kinase.]	GO:0005524;GO:0004674;EC:2.7.11;GO:0006468	.	.
scaffold00001	109532	.	T	A	NON_SYNONYMOUS_CODING	MODERATE	B9J08_002636	C3_02160C_A	.	hypothetical protein	.	.	GO:0000166;GO:0003676	.	.
scaffold00001	283357	.	A	T	NON_SYNONYMOUS_CODING	MODERATE	B9J08_002708	CR_02170W_A	MET2	homoserine O-acetyltransferase	PF12697.2|Abhydrolase_6[Alpha/beta hydrolase family];TIGR01392[homoserO_Ac_trn: homoserine O-acetyltransferase];PF00561.15|Abhydrolase_1[alpha/beta hydrolase fold]	EC:2.3.1.31[Homoserine O-acetyltransferase.]	GO:0009092;GO:0004414;EC:2.3.1.31;GO:0005737;GO:0009086	ko00920[Sulfur metabolism]	.
scaffold00001	298557	.	A	G	NON_SYNONYMOUS_CODING	MODERATE	B9J08_002714	C7_03270W_B	.	hypothetical protein	PF05383.12|La[La domain]	.	GO:0005829	.	.
scaffold00001	328554	.	T	G	NON_SYNONYMOUS_CODING	MODERATE	B9J08_002735	.	.	hypothetical protein	.	.	.	.	.
scaffold00001	336227	.	G	T	NON_SYNONYMOUS_CODING	MODERATE	B9J08_002737	C3_03470W_A	.	hypothetical protein	PF00171.17|Aldedh[Aldehyde dehydrogenase family]	EC:1.2.1.16[Succinate-semialdehyde dehydrogenase (NAD(P)(+)).]	GO:0009013;EC:1.2.1.24;EC:1.2.1.16;GO:0004777;GO:0055114;GO:0005737;GO:0008886;EC:1.2.1.3;GO:0006540;EC:1.2.1.9;GO:0034599;GO:0009450;GO:0004029	ko00350[Tyrosine metabolism];ko00650[Butanoate metabolism]	.
scaffold00001	341262	.	A	G	NON_SYNONYMOUS_CODING	MODERATE	B9J08_002739	C1_09850C_A	.	hypothetical protein	PF10303.4|DUF2408[Protein of unknown function (DUF2408)]	.	GO:0005634;GO:0005829	.	.
scaffold00001	459851	.	T	A	NON_SYNONYMOUS_CODING	MODERATE	B9J08_002799	C2_07080C_A	.	hypothetical protein	PF00571.23|CBS[CBS domain]	.	.	.	.
scaffold00001	516674	.	T	A	NON_SYNONYMOUS_CODING	MODERATE	B9J08_002832	CR_07910C_A	.	hypothetical protein	PF00271.26|Helicase_C[Helicase conserved C-terminal domain];PF00176.18|SNF2_N[SNF2 family N-terminal domain]	.	GO:0001208;GO:0005524;GO:0005829;GO:0006283;GO:0008094	.	.
scaffold00001	516675	.	C	T	NON_SYNONYMOUS_CODING	MODERATE	B9J08_002832	CR_07910C_A	.	hypothetical protein	PF00271.26|Helicase_C[Helicase conserved C-terminal domain];PF00176.18|SNF2_N[SNF2 family N-terminal domain]	.	GO:0001208;GO:0005524;GO:0005829;GO:0006283;GO:0008094	.	.
scaffold00001	527547	.	G	C	NON_SYNONYMOUS_CODING	MODERATE	B9J08_002836	C4_00400W_A	MNR2	hypothetical protein	PF01544.13|CorA[CorA-like Mg2+ transporter protein]	.	GO:0055085;GO:0010961;GO:0046873;GO:0000329;GO:0016021;GO:0030001	.	TMH:2
scaffold00001	599302	.	A	G	NON_SYNONYMOUS_CODING	MODERATE	B9J08_002862	C3_00620C_A	.	hypothetical protein	PF10203.4|Pet191_N[Cytochrome c oxidase assembly protein PET191]	.	GO:0033617;GO:0005634;GO:0005829;GO:0005758;GO:0031305	.	.
scaffold00001	604650	.	A	G	NON_SYNONYMOUS_CODING	MODERATE	B9J08_002865	C3_00630W_A	.	hypothetical protein	PF12234.3|Rav1p_C[RAVE protein 1 C terminal]	.	GO:0045022;GO:0010008;GO:0005634;GO:0071294;GO:0043254;GO:0019898;GO:0007035;GO:0071277;GO:0043291;GO:0005829;GO:0032403	.	.
scaffold00001	657922	.	A	T	NON_SYNONYMOUS_CODING	MODERATE	B9J08_002892	C1_10310W_A	.	hypothetical protein	PF12847.2|Methyltransf_18[Methyltransferase domain];PF08242.7|Methyltransf_12[Methyltransferase domain];PF13649.1|Methyltransf_25[Methyltransferase domain];PF08241.7|Methyltransf_11[Methyltransferase domain];PF01209.13|Ubie_methyltran[ubiE/COQ5 methyltransferase family];PF13489.1|Methyltransf_23[Methyltransferase domain];PF13847.1|Methyltransf_31[Methyltransferase domain]	.	EC:2.1.1.145;GO:0005829;GO:0032259;GO:0046547	.	.
scaffold00001	666352	.	G	T	NON_SYNONYMOUS_CODING	MODERATE	B9J08_002896	C3_06620W_A	FUN31	hypothetical protein	PF14531.1|Kinase-like[Kinase-like];PF00069.20|Pkinase[Protein kinase domain];PF07714.12|Pkinase_Tyr[Protein tyrosine kinase]	EC:2.7.11.-[Protein-serine/threonine kinases.]	GO:0005524;GO:0004672;GO:0006468	.	.
scaffold00001	713562	.	C	T	NON_SYNONYMOUS_CODING	MODERATE	B9J08_002925	C5_01500C_A	ZCF20	hypothetical protein	.	.	GO:0006357;GO:0000981;GO:0005634;GO:0043457;GO:0008270	.	.
scaffold00001	722098	.	G	A	NON_SYNONYMOUS_CODING	MODERATE	B9J08_002929	C5_01460W_A	YBL053	hypothetical protein	PF04821.9|TIMELESS[Timeless protein]	.	GO:0003677;GO:0006281;GO:0044732;GO:0048478;GO:0000790;GO:0033314;GO:0045950;GO:0031298;GO:0005829;GO:0043111;GO:0031297;GO:0043570;GO:0007064;GO:0007534	.	.
scaffold00001	741842	.	G	T	NON_SYNONYMOUS_CODING	MODERATE	B9J08_002939	C5_03170C_A	.	hypothetical protein	.	.	GO:0005840;GO:0005935	.	.
scaffold00001	782691	.	A	G	NON_SYNONYMOUS_CODING	MODERATE	B9J08_002957	C2_05670C_A	.	tRNA-intron endonuclease	TIGR00324[endA: tRNA-intron endonuclease];PF01974.12|tRNA_int_endo[tRNA intron endonuclease, catalytic C-terminal domain]	EC:3.1.27.9[tRNA-intron endonuclease.]	EC:3.1.27.9;GO:0006388;GO:0090502;GO:0000213;GO:0003676	.	.
scaffold00001	783796	.	C	T	NON_SYNONYMOUS_CODING	MODERATE	B9J08_002958	.	.	hypothetical protein	.	.	.	.	.
scaffold00001	827643	.	C	T	NON_SYNONYMOUS_CODING	MODERATE	B9J08_002983	CR_03380W_A	MTG1	hypothetical protein	PF01926.18|MMR_HSR1[50S ribosome-binding GTPase]	.	GO:0016787;GO:0032543;GO:0005743;GO:0005525	.	.
scaffold00001	846647	.	T	A	NON_SYNONYMOUS_CODING	MODERATE	B9J08_002993	C2_10530C_A	KIN3	hypothetical protein	PF00069.20|Pkinase[Protein kinase domain];PF07714.12|Pkinase_Tyr[Protein tyrosine kinase]	EC:2.7.11.1[Non-specific serine/threonine protein kinase.]	GO:0007059;GO:0005524;GO:0071958;GO:0005635;GO:0006468;GO:1903380;GO:0090307;GO:0031030;GO:0004674;EC:2.7.11;GO:0005829;GO:0031028;GO:0010971	.	.
scaffold00001	880227	.	G	C	NON_SYNONYMOUS_CODING	MODERATE	B9J08_003008	C6_04270W_A	CDC39	hypothetical protein	PF12842.2|DUF3819[Domain of unknown function (DUF3819)];PF04054.10|Not1[CCR4-Not complex component, Not1]	.	GO:0007124;GO:0006368;GO:0005634;GO:0032968;GO:0000289;GO:0005829;GO:0051726;GO:0000749;GO:0030015	.	.
scaffold00001	908656	.	C	G	NON_SYNONYMOUS_CODING	MODERATE	B9J08_003025	.	.	hypothetical protein	.	.	.	.	.
scaffold00001	953203	.	G	A	NON_SYNONYMOUS_CODING	MODERATE	B9J08_003050	C2_01550W_A	SMP2	hypothetical protein	PF08235.8|LNS2[LNS2 (Lipin/Ned1/Smp2)];PF04571.9|Lipin_N[lipin, N-terminal conserved region]	EC:3.1.3.4[Phosphatidate phosphatase.]	GO:0006997;GO:0006913;GO:0005829;GO:0007029	.	.
scaffold00001	987231	.	A	C	NON_SYNONYMOUS_CODING	MODERATE	B9J08_003069	C6_02120W_A	CHC1	hypothetical protein	PF13838.1|Clathrin_H_link[Clathrin-H-link];PF00637.15|Clathrin[Region in Clathrin and VPS]	.	GO:0006886;GO:0030132;GO:0030130;GO:0005198;GO:0016192	ko05016[Huntington's disease];ko04144[Endocytosis];ko05100[Bacterial invasion of epithelial cells]	.
scaffold00001	987344	.	C	T	NON_SYNONYMOUS_CODING	MODERATE	B9J08_003069	C6_02120W_A	CHC1	hypothetical protein	PF13838.1|Clathrin_H_link[Clathrin-H-link];PF00637.15|Clathrin[Region in Clathrin and VPS]	.	GO:0006886;GO:0030132;GO:0030130;GO:0005198;GO:0016192	ko05016[Huntington's disease];ko04144[Endocytosis];ko05100[Bacterial invasion of epithelial cells]	.
scaffold00001	998537	.	C	G	NON_SYNONYMOUS_CODING	MODERATE	B9J08_003076	C2_02720W_A	.	hypothetical protein	PF08506.5|Cse1[Cse1];PF03810.14|IBN_N[Importin-beta N-terminal domain]	.	GO:0006406;GO:0005634;GO:0008536;GO:0008565;GO:0005737	.	.
scaffold00001	1100881	.	A	G	NON_SYNONYMOUS_CODING	MODERATE	B9J08_003132	C2_04660C_A	YAK1	hypothetical protein	PF00069.20|Pkinase[Protein kinase domain];PF01636.18|APH[Phosphotransferase enzyme family];PF07714.12|Pkinase_Tyr[Protein tyrosine kinase]	EC:2.7.12.1[Dual-specificity kinase.]	GO:0051286;GO:0005634;GO:0005524;GO:0044732;GO:0004713;GO:0004674;GO:0005829;EC:2.7.11;EC:2.7.10;GO:0018108	.	.
scaffold00001	1130935	.	T	G	NON_SYNONYMOUS_CODING	MODERATE	B9J08_003151	C1_07540C_B	BBC1	hypothetical protein	PF14604.1|SH3_9[Variant SH3 domain];PF07653.12|SH3_2[Variant SH3 domain];PF00018.23|SH3_1[SH3 domain]	.	GO:0017024;GO:0030479;GO:0030036	.	.
scaffold00001	1185440	.	C	T	NON_SYNONYMOUS_CODING	MODERATE	B9J08_003179	C2_05860C_A	.	hypothetical protein	.	.	GO:0003677;GO:0006950	.	.
scaffold00001	1202298	.	T	A	NON_SYNONYMOUS_CODING	MODERATE	B9J08_003188	.	.	hypothetical protein	PF08058.6|NPCC[Nuclear pore complex component]	.	.	.	.
scaffold00001	1267392	.	C	G	NON_SYNONYMOUS_CODING	MODERATE	B9J08_003219	C4_05560C_A	ARO9	hypothetical protein	PF00155.16|Aminotran_1_2[Aminotransferase class I and II]	EC:2.6.1.28[Tryptophan--phenylpyruvate transaminase.];EC:2.6.1.58[Phenylalanine(histidine) transaminase.]	EC:2.6.1.57;GO:0009072;GO:0005634;GO:0009058;GO:0008793;GO:0030170;GO:0005737	ko00360[Phenylalanine metabolism];ko00400[Phenylalanine, tyrosine and tryptophan biosynthesis];ko00960[Tropane, piperidine and pyridine alkaloid biosynthesis]	.
scaffold00001	1282531	.	G	T	NON_SYNONYMOUS_CODING	MODERATE	B9J08_003227	C1_03740W_A	WAR1	hypothetical protein	.	.	GO:0000981;GO:0005634;GO:0001101;GO:0061402;GO:0043565;GO:0008270;GO:0005739	.	.
scaffold00001	1299549	.	T	C	NON_SYNONYMOUS_CODING	MODERATE	B9J08_003232	C1_00550W_A	CIS2	gamma-glutamyltransferase	TIGR00066[g_glut_trans: gamma-glutamyltransferase];PF01019.16|G_glu_transpept[Gamma-glutamyltranspeptidase]	EC:2.3.2.2[Gamma-glutamyltransferase.]	GO:0000324;GO:0006751;GO:0006805	ko00480[Glutathione metabolism];ko00590[Arachidonic acid metabolism];ko00460[Cyanoamino acid metabolism]	.
scaffold00001	1303981	.	C	T	NON_SYNONYMOUS_CODING	MODERATE	B9J08_003234	C1_00560W_A	CNS1	hypothetical protein	PF00515.23|TPR_1[Tetratricopeptide repeat];PF13414.1|TPR_11[TPR repeat];PF07719.12|TPR_2[Tetratricopeptide repeat]	.	GO:0006457;GO:0051879;GO:0035690;GO:0030544;GO:0005737	.	.
scaffold00001	1324013	.	C	T	NON_SYNONYMOUS_CODING	MODERATE	B9J08_003242	C1_00640C_A	RPO41	hypothetical protein	PF14700.1|RPOL_N[DNA-directed RNA polymerase N-terminal];PF00940.14|RNA_pol[DNA-dependent RNA polymerase]	EC:2.7.7.6[DNA-directed RNA polymerase.]	GO:0006390;GO:0003899;GO:0003677;EC:2.7.7.6;GO:0042645;GO:0034245;GO:0000002	.	.
scaffold00001	1326033	.	C	G	NON_SYNONYMOUS_CODING	MODERATE	B9J08_003242	C1_00640C_A	RPO41	hypothetical protein	PF14700.1|RPOL_N[DNA-directed RNA polymerase N-terminal];PF00940.14|RNA_pol[DNA-dependent RNA polymerase]	EC:2.7.7.6[DNA-directed RNA polymerase.]	GO:0006390;GO:0003899;GO:0003677;EC:2.7.7.6;GO:0042645;GO:0034245;GO:0000002	.	.
scaffold00001	1334668	.	T	G	NON_SYNONYMOUS_CODING	MODERATE	B9J08_003247	C1_00690W_A	RIC1	hypothetical protein	PF07064.8|RIC1[RIC1]	.	GO:0006886;GO:0005829;GO:0042147;GO:0043547;GO:0034066;GO:0005801;GO:0000139	.	.
scaffold00001	1343891	.	T	A	NON_SYNONYMOUS_CODING	MODERATE	B9J08_003251	C1_02990C_A	XOG1	hypothetical protein	PF00150.13|Cellulase[Cellulase (glycosyl hydrolase family 5)]	EC:3.2.1.58[Glucan 1,3-beta-glucosidase.]	GO:0050839;GO:1990819;GO:0031589;GO:0070879;GO:0009986;GO:0044407;GO:0044011;EC:3.2.1.75;GO:0000935;GO:0005576;GO:0004338;GO:0046557;EC:3.2.1.58;GO:1904541	.	.
scaffold00001	1483574	.	G	A	NON_SYNONYMOUS_CODING	MODERATE	B9J08_003315	C1_14210C_A	IML2	hypothetical protein	PF10300.4|DUF3808[Protein of unknown function (DUF3808)]	.	GO:0016020;GO:0005829;GO:0005739	.	.
scaffold00001	1502595	.	T	C	NON_SYNONYMOUS_CODING	MODERATE	B9J08_003323	C2_09990C_A	YOR1	hypothetical protein	PF00005.22|ABC_tran[ABC transporter];PF00664.18|ABC_membrane[ABC transporter transmembrane region]	.	EC:3.6.3.44;GO:0005524;GO:0016021;GO:0008559;GO:0042908;GO:0006855	.	TMH:10
scaffold00001	1524574	.	A	G	NON_SYNONYMOUS_CODING	MODERATE	B9J08_003340	C2_00970C_A	UBP13	hypothetical protein	PF00443.24|UCH[Ubiquitin carboxyl-terminal hydrolase];PF13423.1|UCH_1[Ubiquitin carboxyl-terminal hydrolase]	EC:3.1.2.15[Ubiquitin thiolesterase.]	GO:0051286;GO:0005634;GO:0036459;GO:0032153;GO:0006511;EC:3.4.19.12;GO:0005829;GO:0034613;GO:0006897;GO:0016579	.	.
scaffold00001	1533528	.	T	A	NON_SYNONYMOUS_CODING	MODERATE	B9J08_003346	C4_04750W_A	.	hypothetical protein	PF10607.4|CLTH[CTLH/CRA C-terminal to LisH motif domain];PF08513.6|LisH[LisH]	.	GO:0007089;GO:0043161;GO:0034657;GO:0045721	.	.
scaffold00001	1555897	.	C	T	NON_SYNONYMOUS_CODING	MODERATE	B9J08_003354	C4_06060W_A	VPS13	hypothetical protein	PF12624.2|Chorein_N[N-terminal region of Chorein, a TM vesicle-mediated sorter];PF06650.7|DUF1162[Protein of unknown function (DUF1162)]	.	.	.	.
scaffold00001	1649205	.	T	G	NON_SYNONYMOUS_CODING	MODERATE	B9J08_003401	C1_01100W_A	CCH1	hypothetical protein	PF00520.26|Ion_trans[Ion transport protein]	.	GO:0005244;GO:0005783;GO:0071260;GO:0030448;GO:0034765;GO:1901196;GO:0098703;GO:0005829;GO:0005509;GO:0016021;GO:0005262;GO:0005886	.	TMH:23
scaffold00001	1653040	.	A	T	NON_SYNONYMOUS_CODING	MODERATE	B9J08_003401	C1_01100W_A	CCH1	hypothetical protein	PF00520.26|Ion_trans[Ion transport protein]	.	GO:0005244;GO:0005783;GO:0071260;GO:0030448;GO:0034765;GO:1901196;GO:0098703;GO:0005829;GO:0005509;GO:0016021;GO:0005262;GO:0005886	.	TMH:23
scaffold00001	1653620	.	T	G	NON_SYNONYMOUS_CODING	MODERATE	B9J08_003401	C1_01100W_A	CCH1	hypothetical protein	PF00520.26|Ion_trans[Ion transport protein]	.	GO:0005244;GO:0005783;GO:0071260;GO:0030448;GO:0034765;GO:1901196;GO:0098703;GO:0005829;GO:0005509;GO:0016021;GO:0005262;GO:0005886	.	TMH:23
scaffold00001	1666044	.	C	T	NON_SYNONYMOUS_CODING	MODERATE	B9J08_003406	C1_01160C_A	.	hypothetical protein	.	.	GO:0003723;GO:0000176;GO:0000467;GO:0071035;GO:0016787;GO:0000177;GO:0030145;GO:0071038	.	.
scaffold00001	1679111	.	G	A	NON_SYNONYMOUS_CODING	MODERATE	B9J08_003412	CR_03910C_A	TAF12L	hypothetical protein	PF03847.8|TFIID_20kDa[Transcription initiation factor TFIID subunit A]	.	GO:0000124;GO:0032947;GO:0042802;GO:0046982;GO:0046695;GO:0016573;GO:0005669;GO:0003682;GO:0017025;GO:0001102;GO:0051123	.	.
scaffold00001	1679782	.	C	T	NON_SYNONYMOUS_CODING	MODERATE	B9J08_003413	C4_00440C_A	OPT7	hypothetical protein	PF03169.10|OPT[OPT oligopeptide transporter protein]	.	GO:0055085;GO:0016021	.	TMH:11
scaffold00001	1727090	.	C	G	NON_SYNONYMOUS_CODING	MODERATE	B9J08_003434	.	.	hypothetical protein	.	.	.	.	.
scaffold00001	1832284	.	G	T	NON_SYNONYMOUS_CODING	MODERATE	B9J08_003479	CR_01030W_A	DAL81	hypothetical protein	PF04082.13|Fungal_trans[Fungal specific transcription factor domain];PF00172.13|Zn_clus[Fungal Zn(2)-Cys(6) binuclear cluster domain]	.	GO:1901717;GO:0003677;GO:0000981;GO:0005634;GO:0001128;GO:0001080;GO:1901714;GO:0045944;GO:0019740;GO:0008270;GO:0001135;GO:0051123	.	.
scaffold00001	1866726	.	C	T	NON_SYNONYMOUS_CODING	MODERATE	B9J08_003498	CR_03240C_A	.	hypothetical protein	PF12171.3|zf-C2H2_jaz[Zinc-finger double-stranded RNA-binding];PF00226.26|DnaJ[DnaJ domain];PF12874.2|zf-met[Zinc-finger of C2H2 type];PF12756.2|zf-C2H2_2[C2H2 type zinc-finger (2 copies)]	.	GO:0001671;GO:0008361;GO:0000054;GO:0022625;GO:0006364;GO:0003676;GO:0032781;GO:0005730;GO:0008270;GO:0006897;GO:0005739;GO:0042273	.	.
scaffold00001	1886342	.	T	C	NON_SYNONYMOUS_CODING	MODERATE	B9J08_003506	CR_01550C_A	.	hypothetical protein	PF01026.16|TatD_DNase[TatD related DNase]	EC:3.1.21.-[Endodeoxyribonucleases producing 5'-phosphomonoesters.]	GO:0034599;GO:0000738;GO:0016888;GO:0008296;GO:0005737;EC:3.1.21;GO:0006309	.	.
scaffold00001	1909418	.	A	T	NON_SYNONYMOUS_CODING	MODERATE	B9J08_003518	C4_00040W_A	CNH1	sodium/hydrogen antiporter	PF08619.5|Nha1_C[Alkali metal cation/H+ antiporter Nha1 C terminus];PF00999.16|Na_H_Exchanger[Sodium/hydrogen exchanger family]	.	GO:0097623;GO:1902600;GO:0030007;GO:0015385;GO:0045121;GO:0006970;GO:0036376;GO:0016021;GO:0005886	.	TMH:8
scaffold00001	1912793	.	A	G	NON_SYNONYMOUS_CODING	MODERATE	B9J08_003519	C4_00060W_A	.	hypothetical protein	PF04752.7|ChaC[ChaC-like protein]	.	EC:2.3.2.4;GO:0003839;GO:0005634;GO:0006751;GO:0005829	.	.
scaffold00001	1921310	.	T	C	NON_SYNONYMOUS_CODING	MODERATE	B9J08_003524	C4_00610W_A	.	hypothetical protein	PF08659.5|KR[KR domain];PF00106.20|adh_short[short chain dehydrogenase]	.	GO:0016021	.	TMH:2
scaffold00001	2000144	.	A	G	NON_SYNONYMOUS_CODING	MODERATE	B9J08_003567	C3_07320W_A	MDS3	hypothetical protein	PF13415.1|Kelch_3[Galactose oxidase, central domain];PF01344.20|Kelch_1[Kelch motif]	.	GO:0051716;GO:0044182;GO:0009628	.	.
scaffold00001	2034227	.	C	T	NON_SYNONYMOUS_CODING	MODERATE	B9J08_003583	C2_10610W_A	GYP5	hypothetical protein	PF00566.13|RabGAP-TBC[Rab-GTPase-TBC domain]	.	.	.	.
scaffold00001	2037766	.	C	T	NON_SYNONYMOUS_CODING	MODERATE	B9J08_003584	.	.	hypothetical protein	.	.	.	.	.
scaffold00001	2099095	.	C	T	NON_SYNONYMOUS_CODING	MODERATE	B9J08_003609	C1_08400C_A	GCV2	glycine dehydrogenase	TIGR00461[gcvP: glycine dehydrogenase];PF02347.11|GDC-P[Glycine cleavage system P-protein]	EC:1.4.4.2[Glycine dehydrogenase (decarboxylating).]	GO:0019464;EC:1.4.4.2;GO:0006730;GO:0005739;GO:0055114;GO:0004375	.	.
scaffold00001	2115899	.	A	T	NON_SYNONYMOUS_CODING	MODERATE	B9J08_003615	C1_08320W_A	TKL1	transketolase 1	TIGR00232[tktlase_bact: transketolase];PF13292.1|DXP_synthase_N[1-deoxy-D-xylulose-5-phosphate synthase];PF02780.15|Transketolase_C[Transketolase, C-terminal domain];PF02779.19|Transket_pyr[Transketolase, pyrimidine binding domain];PF00456.16|Transketolase_N[Transketolase, thiamine diphosphate binding domain]	EC:2.2.1.1[Transketolase.]	GO:0005634;GO:0008152;EC:2.2.1.1;GO:0009986;GO:0046872;GO:0030445;GO:0005829;GO:0016021;GO:0005886;GO:0004802	ko01051[Biosynthesis of ansamycins];ko00710[Carbon fixation in photosynthetic organisms]	.
scaffold00001	2159402	.	C	T	NON_SYNONYMOUS_CODING	MODERATE	B9J08_003632	C2_05460W_A	CDC19	pyruvate kinase	PF02887.11|PK_C[Pyruvate kinase, alpha/beta domain];PF00224.16|PK[Pyruvate kinase, barrel domain];TIGR01064[pyruv_kin: pyruvate kinase]	EC:2.7.1.40[Pyruvate kinase.]	GO:0000287;GO:0036170;GO:0009267;GO:0005524;GO:0004743;GO:0044416;GO:0030955;GO:0030446;GO:0042866;GO:0005829;GO:0005886;GO:0061621;GO:0036180;GO:0016301;GO:0071216;GO:0009986;EC:2.7.1.40;GO:0030445	ko00230[Purine metabolism];ko00620[Pyruvate metabolism];ko04930[Type II diabetes mellitus];ko00710[Carbon fixation in photosynthetic organisms]	.
scaffold00001	2173164	.	A	T	NON_SYNONYMOUS_CODING	MODERATE	B9J08_003639	C2_02440W_A	.	hypothetical protein	PF10367.4|Vps39_2[Vacuolar sorting protein 39 domain 2];PF10366.4|Vps39_1[Vacuolar sorting protein 39 domain 1]	.	GO:0005634;GO:0000329;GO:0043547;GO:0017112;GO:0042144;GO:0034727;GO:0016192;GO:0035091;GO:0030897;GO:0005829;GO:0035542;GO:0032889	.	.
scaffold00001	2178905	.	A	G	NON_SYNONYMOUS_CODING	MODERATE	B9J08_003640	C2_02430W_A	UTP21	hypothetical protein	PF04192.7|Utp21[Utp21 specific WD40 associated putative domain];PF00400.27|WD40[WD domain, G-beta repeat]	.	GO:0072686;GO:0034388;GO:0044732;GO:0032040;GO:0005829;GO:0006364;GO:0032153	.	.
scaffold00001	2255021	.	C	T	NON_SYNONYMOUS_CODING	MODERATE	B9J08_003684	C6_02010C_A	GPD2	glycerol-3-phosphate dehydrogenase (NAD(+))	PF07479.9|NAD_Gly3P_dh_C[NAD-dependent glycerol-3-phosphate dehydrogenase C-terminus];TIGR03376[glycerol3P_DH: glycerol-3-phosphate dehydrogenase (NAD(+))];PF01210.18|NAD_Gly3P_dh_N[NAD-dependent glycerol-3-phosphate dehydrogenase N-terminus]	EC:1.1.1.8[Glycerol-3-phosphate dehydrogenase (NAD(+)).]	EC:1.1.1.94;GO:0046168;GO:0051287;GO:0055114;GO:0042803;GO:0004367;GO:0009986;EC:1.1.1.8;GO:0009331;GO:0005975	.	.
scaffold00001	2298010	.	T	G	NON_SYNONYMOUS_CODING	MODERATE	B9J08_003706	CR_05240C_A	FGR14	hypothetical protein	PF00078.22|RVT_1[Reverse transcriptase (RNA-dependent DNA polymerase)]	.	.	.	.
scaffold00001	2318806	.	A	G	NON_SYNONYMOUS_CODING	MODERATE	B9J08_003713	C6_02290C_A	.	hypothetical protein	PF08608.7|Wyosine_form[Wyosine base formation];PF04055.16|Radical_SAM[Radical SAM superfamily];PF00258.20|Flavodoxin_1[Flavodoxin]	.	GO:0005783;GO:0010181;GO:0016021;GO:0031591;GO:0003824;GO:0051536	.	TMH:1
scaffold00001	2381547	.	T	A	NON_SYNONYMOUS_CODING	MODERATE	B9J08_003741	C2_10450W_A	NCE4	hypothetical protein	.	.	.	.	.
scaffold00001	2398688	.	C	G	NON_SYNONYMOUS_CODING	MODERATE	B9J08_003752	C3_04640W_A	ZCF31	hypothetical protein	PF00172.13|Zn_clus[Fungal Zn(2)-Cys(6) binuclear cluster domain]	.	.	.	.
scaffold00001	2412231	.	T	G	NON_SYNONYMOUS_CODING	MODERATE	B9J08_003761	C3_04740C_A	.	hypothetical protein	PF01131.15|Topoisom_bac[DNA topoisomerase];PF01751.17|Toprim[Toprim domain]	EC:5.99.1.2[DNA topoisomerase.]	GO:0003677;GO:0003917;GO:0007131;EC:5.99.1.2;GO:0007004;GO:0000018;GO:0031422;GO:0006265;GO:0007064	.	.
scaffold00001	2452768	.	T	A	NON_SYNONYMOUS_CODING	MODERATE	B9J08_003776	C4_06770W_A	.	hypothetical protein	PF01545.16|Cation_efflux[Cation efflux family]	.	GO:0005783;GO:0006882;GO:0016021;GO:0005385;GO:0071577;GO:0000139	.	TMH:13
scaffold00001	2461659	.	T	A	NON_SYNONYMOUS_CODING	MODERATE	B9J08_003780	C4_07060W_A	.	DNA-directed RNA polymerase III subunit RPC1	PF04997.7|RNA_pol_Rpb1_1[RNA polymerase Rpb1, domain 1];PF04983.13|RNA_pol_Rpb1_3[RNA polymerase Rpb1, domain 3];PF00623.15|RNA_pol_Rpb1_2[RNA polymerase Rpb1, domain 2];PF05000.12|RNA_pol_Rpb1_4[RNA polymerase Rpb1, domain 4];PF04998.12|RNA_pol_Rpb1_5[RNA polymerase Rpb1, domain 5]	EC:2.7.7.6[DNA-directed RNA polymerase.]	GO:0003899;GO:0032549;GO:0003677;EC:2.7.7.6;GO:0008270;GO:0042797;GO:0005666;GO:0005737	ko04623[Cytosolic DNA-sensing pathway];ko00240[Pyrimidine metabolism];ko03020[RNA polymerase]	.
scaffold00001	2462216	.	A	G	NON_SYNONYMOUS_CODING	MODERATE	B9J08_003780	C4_07060W_A	.	DNA-directed RNA polymerase III subunit RPC1	PF04997.7|RNA_pol_Rpb1_1[RNA polymerase Rpb1, domain 1];PF04983.13|RNA_pol_Rpb1_3[RNA polymerase Rpb1, domain 3];PF00623.15|RNA_pol_Rpb1_2[RNA polymerase Rpb1, domain 2];PF05000.12|RNA_pol_Rpb1_4[RNA polymerase Rpb1, domain 4];PF04998.12|RNA_pol_Rpb1_5[RNA polymerase Rpb1, domain 5]	EC:2.7.7.6[DNA-directed RNA polymerase.]	GO:0003899;GO:0032549;GO:0003677;EC:2.7.7.6;GO:0008270;GO:0042797;GO:0005666;GO:0005737	ko04623[Cytosolic DNA-sensing pathway];ko00240[Pyrimidine metabolism];ko03020[RNA polymerase]	.
scaffold00001	2474991	.	T	C	NON_SYNONYMOUS_CODING	MODERATE	B9J08_003784	C4_07100C_A	.	hypothetical protein	PF00271.26|Helicase_C[Helicase conserved C-terminal domain];PF04851.10|ResIII[Type III restriction enzyme, res subunit];PF02889.11|Sec63[Sec63 Brl domain];PF00270.24|DEAD[DEAD/DEAH box helicase]	EC:3.6.4.13[RNA helicase.]	GO:0005524;GO:0003676;GO:0046540;GO:0005681;GO:0004004;GO:0000388;GO:0005829;GO:0005682	.	.
scaffold00001	2504994	.	C	T	NON_SYNONYMOUS_CODING	MODERATE	B9J08_003796	C7_03490W_A	GYP7	hypothetical protein	PF00566.13|RabGAP-TBC[Rab-GTPase-TBC domain]	.	GO:0005634;GO:0005829;GO:0032889;GO:0016192	.	.
scaffold00001	2523672	.	A	T	NON_SYNONYMOUS_CODING	MODERATE	B9J08_003802	C2_10090C_A	.	hypothetical protein	PF13041.1|PPR_2[PPR repeat family]	.	GO:0005739	.	.
scaffold00001	2546825	.	G	A	NON_SYNONYMOUS_CODING	MODERATE	B9J08_003810	C2_09980W_B	.	hypothetical protein	PF08577.6|PI31_Prot_C[PI31 proteasome regulator]	.	.	.	.
scaffold00001	2548225	.	T	C	NON_SYNONYMOUS_CODING	MODERATE	B9J08_003812	C3_00510W_A	.	hypothetical protein	.	.	GO:0031505	.	.
scaffold00001	2604516	.	G	T	NON_SYNONYMOUS_CODING	MODERATE	B9J08_003839	C1_11510C_A	.	hypothetical protein	PF00226.26|DnaJ[DnaJ domain]	.	GO:0005739	.	.
scaffold00001	2616422	.	A	G	NON_SYNONYMOUS_CODING	MODERATE	B9J08_003845	.	.	hypothetical protein	.	.	.	.	.
scaffold00001	2719634	.	G	A	NON_SYNONYMOUS_CODING	MODERATE	B9J08_003891	.	.	hypothetical protein	.	.	GO:0006357;GO:0003677;GO:0000981;GO:0005634;GO:0008270;GO:0006351	.	.
scaffold00001	2776751	.	T	A	NON_SYNONYMOUS_CODING	MODERATE	B9J08_003915	C1_12350W_A	.	hypothetical protein	PF13638.1|PIN_4[PIN domain];PF00773.14|RNB[RNB domain]	EC:3.1.13.-[Exoribonucleases producing 5'-phosphomonoesters.]	GO:0000176;GO:0071028;GO:0000175;GO:0000467;GO:0071035;GO:0004521;GO:0071039;EC:3.1.13;GO:0005730;GO:0000177;EC:3.1.13.1;GO:0071038;GO:0000049;GO:0070651;GO:0008859;GO:0090502	.	.
scaffold00001	2798598	.	A	T	NON_SYNONYMOUS_CODING	MODERATE	B9J08_003924	C1_12450C_A	IRA2	hypothetical protein	PF00616.14|RasGAP[GTPase-activator protein for Ras-like GTPase]	.	GO:0043087;GO:0007165	.	.
scaffold00001	2815965	.	C	T	NON_SYNONYMOUS_CODING	MODERATE	B9J08_003931	C1_12250C_A	.	hypothetical protein	PF00571.23|CBS[CBS domain];PF00564.19|PB1[PB1 domain]	.	GO:0016021	.	TMH:1
scaffold00001	2816335	.	A	T	NON_SYNONYMOUS_CODING	MODERATE	B9J08_003931	C1_12250C_A	.	hypothetical protein	PF00571.23|CBS[CBS domain];PF00564.19|PB1[PB1 domain]	.	GO:0016021	.	TMH:1
scaffold00001	2821119	.	G	T	NON_SYNONYMOUS_CODING	MODERATE	B9J08_003934	C1_12240C_B	.	hypothetical protein	PF07973.9|tRNA_SAD[Threonyl and Alanyl tRNA synthetase second additional domain];PF01411.14|tRNA-synt_2c[tRNA synthetases class II (A)]	.	GO:0005524;EC:6.1.1.7;GO:0006419;GO:0006450;GO:0002196;GO:0004813;GO:0003676	.	.
scaffold00001	2840821	.	C	A	NON_SYNONYMOUS_CODING	MODERATE	B9J08_003944	C1_12770W_A	RPG1A	hypothetical protein	PF01399.22|PCI[PCI domain]	.	GO:0010494;GO:0035690;GO:0070321;GO:0001731;GO:0016282;GO:0043614;GO:0071541;GO:0006446;GO:0003743;GO:0071540;GO:0002188;GO:0000131;GO:0033290	.	.
scaffold00001	2900663	.	A	T	NON_SYNONYMOUS_CODING	MODERATE	B9J08_003970	C5_05200C_A	.	hypothetical protein	.	.	GO:0005783;GO:0016021	.	TMH:2
scaffold00001	3063337	.	G	A	NON_SYNONYMOUS_CODING	MODERATE	B9J08_004043	C1_09660W_A	DOA1	hypothetical protein	PF09070.6|PFU[PFU (PLAA family ubiquitin binding)];PF00400.27|WD40[WD domain, G-beta repeat];PF08324.6|PUL[PUL domain]	.	GO:0043130;GO:0006511;GO:0010992;GO:0006303;GO:0005737	.	.
scaffold00001	3122661	.	T	C	NON_SYNONYMOUS_CODING	MODERATE	B9J08_004080	CR_02710W_A	RRP9	hypothetical protein	PF00400.27|WD40[WD domain, G-beta repeat]	.	GO:0030515;GO:0032040;GO:0031428	.	.
scaffold00001	3136594	.	G	T	NON_SYNONYMOUS_CODING	MODERATE	B9J08_004086	CR_02680W_A	.	hypothetical protein	PF03801.8|Ndc80_HEC[HEC/Ndc80p family]	.	GO:0034501;GO:0007059;GO:0042802;GO:0000778;GO:0005200;GO:0031262;GO:0007020	.	.
scaffold00001	3187872	.	G	C	NON_SYNONYMOUS_CODING	MODERATE	B9J08_004100	C5_00730W_A	HYR3	hypothetical protein	PF11765.3|Hyphal_reg_CWP[Hyphally regulated cell wall protein N-terminal]	.	.	.	TMH:1
scaffold00007	8518	.	A	T	NON_SYNONYMOUS_CODING	MODERATE	B9J08_004105	.	.	hypothetical protein	.	.	.	.	.
scaffold00007	8523	.	A	G	NON_SYNONYMOUS_CODING	MODERATE	B9J08_004105	.	.	hypothetical protein	.	.	.	.	.
scaffold00007	8553	.	C	T	NON_SYNONYMOUS_CODING	MODERATE	B9J08_004105	.	.	hypothetical protein	.	.	.	.	.
scaffold00007	8641	.	G	C	NON_SYNONYMOUS_CODING	MODERATE	B9J08_004105	.	.	hypothetical protein	.	.	.	.	.
scaffold00007	26453	.	T	C	NON_SYNONYMOUS_CODING	MODERATE	B9J08_004109	C7_03290C_A	RBR3	hypothetical protein	PF11765.3|Hyphal_reg_CWP[Hyphally regulated cell wall protein N-terminal]	.	.	.	.
scaffold00007	26483	.	G	A	NON_SYNONYMOUS_CODING	MODERATE	B9J08_004109	C7_03290C_A	RBR3	hypothetical protein	PF11765.3|Hyphal_reg_CWP[Hyphally regulated cell wall protein N-terminal]	.	.	.	.
scaffold00007	36798	.	G	C	NON_SYNONYMOUS_CODING	MODERATE	B9J08_004110	CR_03880W_A	IFF9	hypothetical protein	PF11765.3|Hyphal_reg_CWP[Hyphally regulated cell wall protein N-terminal]	.	.	.	.
scaffold00007	94945	.	G	T	NON_SYNONYMOUS_CODING	MODERATE	B9J08_004133	C2_08010W_A	BLM3	hypothetical protein	PF11919.3|DUF3437[Domain of unknown function (DUF3437)]	.	GO:0043248;GO:0005634;GO:0006281;GO:0010499;GO:0043486;GO:0070577;GO:0061136;GO:0034515;GO:0005839;GO:1990237;GO:0016504;GO:0070628;GO:0010952;GO:1990236	.	.
scaffold00007	123041	.	T	G	NON_SYNONYMOUS_CODING	MODERATE	B9J08_004138	C1_12960C_A	BNI1	hypothetical protein	PF06371.8|Drf_GBD[Diaphanous GTPase-binding Domain];PF06367.11|Drf_FH3[Diaphanous FH3 Domain];PF02181.18|FH2[Formin Homology 2 Domain]	.	GO:0000132;GO:0017048;GO:0000133;GO:0043332;GO:0070649;GO:0007118;GO:0000131;GO:2000251;GO:0071519;GO:0042802;GO:0005934;GO:0051016;GO:0005935;GO:0045010;GO:0003779;GO:0005884;GO:0005522;GO:0032880	.	.
scaffold00007	138255	.	T	C	NON_SYNONYMOUS_CODING	MODERATE	B9J08_004144	C1_13020C_A	SPC3	hypothetical protein	PF04573.7|SPC22[Signal peptidase subunit]	EC:3.4.-.-[Acting on peptide bonds (peptide hydrolases).]	GO:0045047;GO:0008233;GO:0031090;GO:0016021;GO:0006465;GO:0005787	.	TMH:1
scaffold00007	153803	.	T	A	NON_SYNONYMOUS_CODING	MODERATE	B9J08_004149	C1_13070C_A	FAD3	hypothetical protein	PF00487.19|FA_desaturase[Fatty acid desaturase]	EC:1.14.19.-[With oxidation of a pair of donors resulting in the reduction of molecular oxygen to two molecules of water.]	EC:1.14.19;GO:0016021;GO:0055114;GO:0006629;GO:0016717	.	TMH:4
scaffold00007	342594	.	G	T	NON_SYNONYMOUS_CODING	MODERATE	B9J08_004232	C1_08110W_A	.	hypothetical protein	.	.	GO:0006406;GO:0031965;GO:0008565;GO:0007088;GO:0008139;GO:0034399;GO:0060188;GO:0005829;GO:0006606	.	.
scaffold00007	343495	.	C	G	NON_SYNONYMOUS_CODING	MODERATE	B9J08_004232	C1_08110W_A	.	hypothetical protein	.	.	GO:0006406;GO:0031965;GO:0008565;GO:0007088;GO:0008139;GO:0034399;GO:0060188;GO:0005829;GO:0006606	.	.
scaffold00007	390027	.	A	G	NON_SYNONYMOUS_CODING	MODERATE	B9J08_004249	.	.	hypothetical protein	.	.	.	.	.
scaffold00007	402671	.	C	A	NON_SYNONYMOUS_CODING	MODERATE	B9J08_004254	.	.	hypothetical protein	.	.	.	.	.
scaffold00007	424702	.	C	T	NON_SYNONYMOUS_CODING	MODERATE	B9J08_004265	C4_00350W_A	PEP7	hypothetical protein	PF01363.16|FYVE[FYVE zinc finger]	.	GO:0006896;GO:0003677;GO:0006281;GO:0006895;GO:0006904;GO:0032266;GO:0010009;GO:0006906;GO:0005794;GO:0005829;GO:0008270;GO:0000011	.	.
scaffold00007	488041	.	A	T	NON_SYNONYMOUS_CODING	MODERATE	B9J08_004294	C5_04670W_A	SRP101	hypothetical protein	PF02881.14|SRP54_N[SRP54-type protein, helical bundle domain];PF03308.11|ArgK[ArgK protein];PF04086.8|SRP-alpha_N[Signal recognition particle, alpha subunit, N-terminal];PF00448.17|SRP54[SRP54-type protein, GTPase domain];PF01656.18|CbiA[CobQ/CobB/MinD/ParA nucleotide binding domain]	.	GO:0006614;GO:0005525;GO:0005047;GO:0003924;GO:0005785	.	.
scaffold00007	530735	.	T	C	NON_SYNONYMOUS_CODING	MODERATE	B9J08_004310	C5_04830W_A	SFL2	hypothetical protein	PF00447.12|HSF_DNA-bind[HSF-type DNA-binding]	.	GO:0060258;GO:0006357;GO:0005634;GO:0043565;GO:0003700;GO:0060257	.	.
scaffold00007	571955	.	C	A	NON_SYNONYMOUS_CODING	MODERATE	B9J08_004328	C5_05020C_A	.	hypothetical protein	PF04756.8|OST3_OST6[OST3 / OST6 family]	.	GO:0035269;GO:0004579;GO:0008250;GO:0006487;GO:0016021;GO:0006461;EC:2.4.1.119	ko00513[Various types of N-glycan biosynthesis];ko04141[Protein processing in endoplasmic reticulum]	TMH:3
scaffold00007	600291	.	C	T	NON_SYNONYMOUS_CODING	MODERATE	B9J08_004341	C1_06720C_A	.	hypothetical protein	PF01266.19|DAO[FAD dependent oxidoreductase];PF13450.1|NAD_binding_8[NAD(P)-binding Rossmann-like domain]	.	GO:0033737;EC:1.2.1.19;GO:0055114;GO:0019145	.	.
scaffold00007	624613	.	T	C	NON_SYNONYMOUS_CODING	MODERATE	B9J08_004351	C5_04400W_A	RNY11	hypothetical protein	PF00445.13|Ribonuclease_T2[Ribonuclease T2 family]	EC:3.1.27.1[Ribonuclease T(2).]	GO:0006401;GO:0000902;EC:3.1.27.1;GO:0003723;GO:0000324;GO:0033897;GO:0006915;GO:0005829;GO:0005576;GO:0090502	.	.
scaffold00007	635860	.	A	G	NON_SYNONYMOUS_CODING	MODERATE	B9J08_004356	C5_04290C_A	.	hypothetical protein	PF01652.13|IF4E[Eukaryotic initiation factor 4E]	.	GO:0006413;GO:0003743;GO:0005737	.	.
scaffold00007	700653	.	T	A	NON_SYNONYMOUS_CODING	MODERATE	B9J08_004383	C5_02470W_B	INT1	hypothetical protein	PF08174.6|Anillin[Cell division protein anillin];PF00169.24|PH[PH domain]	.	GO:0044419;GO:0044464;GO:0040007;GO:0009987	.	.
scaffold00007	701069	.	T	A	NON_SYNONYMOUS_CODING	MODERATE	B9J08_004384	C5_02480W_B	.	hypothetical protein	PF05182.8|Fip1[Fip1 motif]	.	GO:0016071	.	.
scaffold00007	740741	.	G	C	NON_SYNONYMOUS_CODING	MODERATE	B9J08_004401	C5_04640C_A	.	hypothetical protein	PF00004.24|AAA[ATPase family associated with various cellular activities (AAA)];PF07724.9|AAA_2[AAA domain (Cdc48 subfamily)];PF00439.20|Bromodomain[Bromodomain]	.	GO:0042393;GO:0005634;GO:0005524;GO:2000219;GO:0031936;GO:0000122;GO:0042406;GO:0005829;GO:0003682;GO:0045944	.	.
scaffold00007	758696	.	G	T	NON_SYNONYMOUS_CODING	MODERATE	B9J08_004411	C4_00590C_B	.	hypothetical protein	PF01417.15|ENTH[ENTH domain];PF07651.11|ANTH[ANTH domain]	.	GO:0030276;GO:0048268;GO:0005545;GO:0030136	.	.
scaffold00007	851419	.	C	A	NON_SYNONYMOUS_CODING	MODERATE	B9J08_004451	CR_00610W_A	IFF4	hypothetical protein	PF11765.3|Hyphal_reg_CWP[Hyphally regulated cell wall protein N-terminal]	.	.	.	.
scaffold00006	15850	.	T	A	NON_SYNONYMOUS_CODING	MODERATE	B9J08_004472	C3_04160W_A	DAL8	allantoate permease	PF07690.11|MFS_1[Major Facilitator Superfamily]	.	GO:0055085;GO:0016021	.	TMH:5
scaffold00006	27979	.	C	A	NON_SYNONYMOUS_CODING	MODERATE	B9J08_004476	.	.	hypothetical protein	.	.	GO:0044464	.	.
scaffold00006	149057	.	T	C	NON_SYNONYMOUS_CODING	MODERATE	B9J08_004532	C6_01690W_A	ACF2	hypothetical protein	PF03639.8|Glyco_hydro_81[Glycosyl hydrolase family 81]	.	EC:3.2.1.6;GO:0052861	.	.
scaffold00006	170872	.	A	G	NON_SYNONYMOUS_CODING	MODERATE	B9J08_004540	C7_03070C_A	CYR1	hypothetical protein	PF13516.1|LRR_6[Leucine Rich repeat];PF12799.2|LRR_4[Leucine Rich repeats (2 copies)];PF00211.15|Guanylate_cyc[Adenylate and Guanylate cyclase catalytic domain];PF00481.16|PP2C[Protein phosphatase 2C];PF00560.28|LRR_1[Leucine Rich Repeat];PF00788.18|RA[Ras association (RalGDS/AF-6) domain];PF13504.1|LRR_7[Leucine rich repeat];PF13855.1|LRR_8[Leucine rich repeat]	EC:4.6.1.1[Adenylate cyclase.]	GO:0010619;GO:0005622;GO:0000433;GO:0006171;GO:0004016;GO:0010515;GO:0030145;EC:4.6.1.1	ko04113[Meiosis - yeast]	.
scaffold00006	198618	.	A	C	NON_SYNONYMOUS_CODING	MODERATE	B9J08_004549	C1_08990C_A	KEX2	hypothetical protein	PF01483.15|P_proprotein[Proprotein convertase P-domain];PF00082.17|Peptidase_S8[Subtilase family]	EC:3.4.21.61[Kexin.]	GO:0004252;GO:0007323;GO:0006508;EC:3.4.21;GO:0016021;GO:0005802	.	TMH:1
scaffold00006	245418	.	G	A	NON_SYNONYMOUS_CODING	MODERATE	B9J08_004565	CR_06640C_A	.	hypothetical protein	PF08426.5|ICE2[ICE2]	.	GO:0016021	.	TMH:7
scaffold00006	314078	.	A	G	NON_SYNONYMOUS_CODING	MODERATE	B9J08_004594	C6_00560W_A	.	hypothetical protein	PF09531.5|Ndc1_Nup[Nucleoporin protein Ndc1-Nup]	.	GO:0030474;GO:0005816;GO:0006999;GO:0016021;GO:0070762	.	TMH:5
scaffold00006	393542	.	C	A	NON_SYNONYMOUS_CODING	MODERATE	B9J08_004630	C1_13550C_A	NUP49	hypothetical protein	PF13634.1|Nucleoporin_FG[Nucleoporin FG repeat region]	.	GO:0042802;GO:0005487;GO:0006409;GO:0044613;GO:0005737;GO:0016973;GO:0000055;GO:0034399;GO:0006606;GO:0017056	.	.
scaffold00006	451488	.	A	G	NON_SYNONYMOUS_CODING	MODERATE	B9J08_004653	CR_08950W_A	ARP2	hypothetical protein	PF00022.14|Actin[Actin]	.	GO:0030476;GO:0032258;GO:0005885;GO:0034314;GO:0005524;GO:0030100;EC:3.6.1.3;GO:0051654;GO:0030479;GO:0000001;GO:0005739;GO:0016887	.	.
scaffold00006	451721	.	C	T	NON_SYNONYMOUS_CODING	MODERATE	B9J08_004653	CR_08950W_A	ARP2	hypothetical protein	PF00022.14|Actin[Actin]	.	GO:0030476;GO:0032258;GO:0005885;GO:0034314;GO:0005524;GO:0030100;EC:3.6.1.3;GO:0051654;GO:0030479;GO:0000001;GO:0005739;GO:0016887	.	.
scaffold00006	523484	.	G	A	NON_SYNONYMOUS_CODING	MODERATE	B9J08_004690	CR_10770W_A	.	hypothetical protein	PF07690.11|MFS_1[Major Facilitator Superfamily]	.	GO:0055085;GO:0016021	.	TMH:10
scaffold00006	560374	.	T	G	NON_SYNONYMOUS_CODING	MODERATE	B9J08_004707	C4_03290W_B	.	hypothetical protein	PF00867.13|XPG_I[XPG I-region];PF12247.3|MKT1_N[Temperature dependent protein affecting M2 dsRNA replication];PF12246.3|MKT1_C[Temperature dependent protein affecting M2 dsRNA replication];PF00752.12|XPG_N[XPG N-terminal domain]	.	GO:0005634;GO:0006281;GO:0045727;GO:0000932;GO:0004518;GO:0005829;GO:0044419;GO:0090305;GO:0005844	.	.
scaffold00006	576565	.	T	G	NON_SYNONYMOUS_CODING	MODERATE	B9J08_004715	C4_03730C_A	.	hypothetical protein	PF02475.11|Met_10[Met-10+ like-protein]	EC:2.1.1.228[tRNA (guanine(37)-N(1))-methyltransferase.]	EC:2.1.1.228;GO:0005759;GO:0005634;GO:0030488;GO:0052906	.	.
scaffold00006	578566	.	T	A	NON_SYNONYMOUS_CODING	MODERATE	B9J08_004717	.	.	hypothetical protein	PF01105.19|EMP24_GP25L[emp24/gp25L/p24 family/GOLD]	.	GO:0006810;GO:0016021	.	TMH:2
scaffold00006	584356	.	C	T	NON_SYNONYMOUS_CODING	MODERATE	B9J08_004719	C1_08870C_A	JIP5	hypothetical protein	.	.	GO:0005730;GO:0042273	.	.
scaffold00006	684561	.	C	A	NON_SYNONYMOUS_CODING	MODERATE	B9J08_004768	C3_07260C_A	ECM29	hypothetical protein	PF13001.2|Ecm29[Proteasome stabiliser]	.	GO:0043248;GO:0032947;GO:0005634;GO:0000502;GO:0005829	.	.
scaffold00006	756931	.	A	G	NON_SYNONYMOUS_CODING	MODERATE	B9J08_004792	C2_08690C_A	.	hypothetical protein	PF12697.2|Abhydrolase_6[Alpha/beta hydrolase family];PF00561.15|Abhydrolase_1[alpha/beta hydrolase fold]	.	.	.	.
scaffold00006	797715	.	A	T	NON_SYNONYMOUS_CODING	MODERATE	B9J08_004813	C5_01930W_A	.	hypothetical protein	PF11931.3|DUF3449[Domain of unknown function (DUF3449)];PF12171.3|zf-C2H2_jaz[Zinc-finger double-stranded RNA-binding];PF12874.2|zf-met[Zinc-finger of C2H2 type];PF12756.2|zf-C2H2_2[C2H2 type zinc-finger (2 copies)]	.	GO:0046872;GO:0003723;GO:0000398;GO:0005681	.	.
scaffold00006	828300	.	G	A	NON_SYNONYMOUS_CODING	MODERATE	B9J08_004826	C3_04900W_A	NOP14	hypothetical protein	PF04147.7|Nop14[Nop14-like family]	.	GO:0030515;GO:0030692;GO:0000472;GO:0032040;GO:0005730;GO:0000447;GO:0005739;GO:0000480	.	.
scaffold00006	837356	.	A	G	NON_SYNONYMOUS_CODING	MODERATE	B9J08_004830	C4_04230W_A	.	hypothetical protein	PF07690.11|MFS_1[Major Facilitator Superfamily]	.	GO:0055085;GO:0016021	.	TMH:12
scaffold00006	846435	.	T	C	NON_SYNONYMOUS_CODING	MODERATE	B9J08_004834	CR_04570C_A	CDC10	cell division control protein 10	PF01926.18|MMR_HSR1[50S ribosome-binding GTPase];PF04548.11|AIG1[AIG1 family];PF03193.11|DUF258[Protein of unknown function, DUF258];PF00735.13|Septin[Septin]	.	GO:0001410;GO:0005545;GO:0032160;GO:0006033;GO:0043332;GO:0030428;GO:0000281;GO:0001411;GO:0005829;GO:0000131;GO:0000921;GO:0005876;GO:0070783;GO:0032947;GO:0005634;GO:0072687;GO:0030448;GO:0031505;GO:0001400;GO:0010314;GO:0000144;GO:0003924;GO:0044406;GO:0031105;GO:0010458;GO:0070273;GO:0005525;GO:0009405;GO:0005628	.	.
scaffold00006	893499	.	C	G	NON_SYNONYMOUS_CODING	MODERATE	B9J08_004856	C2_01850W_B	RAD23	UV excision repair protein Rad23	PF11976.3|Rad60-SLD[Ubiquitin-2 like Rad60 SUMO-like];PF00240.18|ubiquitin[Ubiquitin family];TIGR00601[rad23: UV excision repair protein Rad23];PF09280.6|XPC-binding[XPC-binding domain];PF00627.26|UBA[UBA/TS-N domain]	.	GO:0000502;GO:0030674;GO:0005635;GO:0000111;GO:0042177;GO:0030433;GO:0016567;GO:0006517;GO:0006289;GO:0043130;GO:0003684;GO:0005829	ko04141[Protein processing in endoplasmic reticulum]	.
scaffold00006	909363	.	A	G	NON_SYNONYMOUS_CODING	MODERATE	B9J08_004862	C2_03430W_A	NBN1	hypothetical protein	PF00628.24|PHD[PHD-finger];PF12998.2|ING[Inhibitor of growth proteins N-terminal histone-binding]	.	GO:0036180;GO:1900404;GO:0006281;GO:0032777;GO:0035064;GO:0043967;GO:2000873;GO:0005829;GO:0008270;GO:0010485	.	.
scaffold00006	919034	.	G	T	NON_SYNONYMOUS_CODING	MODERATE	B9J08_004868	C7_02060W_A	LIG1	hypothetical protein	PF08303.6|tRNA_lig_kinase[tRNA ligase kinase domain];PF08302.6|tRNA_lig_CPD[Fungal tRNA ligase phosphodiesterase domain];PF09511.5|RNA_lig_T4_1[RNA ligase]	EC:6.5.1.3[RNA ligase (ATP).]	EC:6.5.1.3;GO:0016310;GO:0051730;GO:0008081;GO:0005524;GO:0006388;GO:0003972	.	.
scaffold00006	940858	.	A	C	NON_SYNONYMOUS_CODING	MODERATE	B9J08_004875	C4_05740C_A	.	hypothetical protein	PF13771.1|zf-HC5HC2H[PHD-like zinc-binding domain];PF01426.13|BAH[BAH domain];PF00628.24|PHD[PHD-finger];PF13831.1|PHD_2[PHD-finger]	.	GO:0072686;GO:0003677;GO:0044732;GO:0048189;GO:0004842;GO:0016574;GO:0043619;GO:0003682;GO:0008270;GO:0036205	.	.
scaffold00006	942324	.	G	A	NON_SYNONYMOUS_CODING	MODERATE	B9J08_004876	C4_05750C_A	LEA1	hypothetical protein	PF14580.1|LRR_9[Leucine-rich repeat]	.	GO:0071004;GO:0000398;GO:0005686;GO:0005829	.	.
scaffold00002	46682	.	A	T	NON_SYNONYMOUS_CODING	MODERATE	B9J08_004911	CR_08620C_A	.	hypothetical protein	.	.	.	.	.
scaffold00002	58806	.	A	G	NON_SYNONYMOUS_CODING	MODERATE	B9J08_004916	C2_06960W_A	SPE3	spermidine synthase	PF01564.12|Spermine_synth[Spermine/spermidine synthase];TIGR00417[speE: spermidine synthase]	EC:2.5.1.16[Spermidine synthase.]	EC:2.5.1.16;GO:0015940;GO:0008295;GO:0004766	ko00480[Glutathione metabolism];ko00330[Arginine and proline metabolism];ko00410[beta-Alanine metabolism]	.
scaffold00002	96904	.	C	T	NON_SYNONYMOUS_CODING	MODERATE	B9J08_004936	C7_01850C_A	CRN1	hypothetical protein	PF00400.27|WD40[WD domain, G-beta repeat];PF08953.6|DUF1899[Domain of unknown function (DUF1899)];PF08954.6|DUF1900[Domain of unknown function (DUF1900)]	.	GO:0051015;GO:1990819;GO:0005885;GO:0034316;GO:0030674;GO:0051666;GO:0008017;GO:0035838;GO:0030479;GO:0007015;GO:0030139;GO:2000601;GO:0007017;GO:0005826	.	.
scaffold00002	98220	.	A	T	NON_SYNONYMOUS_CODING	MODERATE	B9J08_004936	C7_01850C_A	CRN1	hypothetical protein	PF00400.27|WD40[WD domain, G-beta repeat];PF08953.6|DUF1899[Domain of unknown function (DUF1899)];PF08954.6|DUF1900[Domain of unknown function (DUF1900)]	.	GO:0051015;GO:1990819;GO:0005885;GO:0034316;GO:0030674;GO:0051666;GO:0008017;GO:0035838;GO:0030479;GO:0007015;GO:0030139;GO:2000601;GO:0007017;GO:0005826	.	.
scaffold00002	122482	.	A	T	NON_SYNONYMOUS_CODING	MODERATE	B9J08_004948	C1_00750C_A	VPS27	hypothetical protein	PF00790.14|VHS[VHS domain];PF01363.16|FYVE[FYVE zinc finger]	.	GO:0045053;GO:0046872;GO:0043130;GO:0006623;GO:0032266;GO:0045324;GO:0033565	ko04145[Phagosome]	.
scaffold00002	149340	.	G	A	NON_SYNONYMOUS_CODING	MODERATE	B9J08_004960	C4_06530C_A	XUT1	hypothetical protein	PF00860.15|Xan_ur_permease[Permease family]	.	GO:0055085;GO:0016021;GO:0005215	.	TMH:12
scaffold00002	164395	.	A	G	NON_SYNONYMOUS_CODING	MODERATE	B9J08_004967	C2_02990C_A	HYU1	hypothetical protein	PF05378.8|Hydant_A_N[Hydantoinase/oxoprolinase N-terminal region];PF01968.13|Hydantoinase_A[Hydantoinase/oxoprolinase];PF02538.9|Hydantoinase_B[Hydantoinase B/oxoprolinase]	EC:3.5.2.9[5-oxoprolinase (ATP-hydrolyzing).]	EC:3.5.2.9;GO:0017168	.	.
scaffold00002	166664	.	G	C	NON_SYNONYMOUS_CODING	MODERATE	B9J08_004968	C2_02840C_A	.	hypothetical protein	PF02204.13|VPS9[Vacuolar sorting protein 9 (VPS9) domain]	.	.	.	.
scaffold00002	169918	.	G	A	NON_SYNONYMOUS_CODING	MODERATE	B9J08_004968	C2_02840C_A	.	hypothetical protein	PF02204.13|VPS9[Vacuolar sorting protein 9 (VPS9) domain]	.	.	.	.
scaffold00002	189294	.	G	A	NON_SYNONYMOUS_CODING	MODERATE	B9J08_004979	C1_03800W_A	RPP1	hypothetical protein	PF01876.11|RNase_P_p30[RNase P subunit p30]	EC:3.1.26.5[Ribonuclease P.]	GO:0003723;GO:0005655;GO:0006364;GO:0008033;GO:0000172;GO:0034965;GO:0005829;GO:0090502;GO:0006379;GO:0004540	ko03013[RNA transport]	.
scaffold00002	190254	.	C	T	NON_SYNONYMOUS_CODING	MODERATE	B9J08_004980	.	.	hypothetical protein	PF06881.6|Elongin_A[RNA polymerase II transcription factor SIII (Elongin) subunit A]	.	GO:0005634;GO:0006355;GO:0016021	.	.
scaffold00002	212215	.	C	T	NON_SYNONYMOUS_CODING	MODERATE	B9J08_004988	.	.	hypothetical protein	PF00170.16|bZIP_1[bZIP transcription factor];PF07716.10|bZIP_2[Basic region leucine zipper]	.	GO:0006355;GO:0043565;GO:0003700	.	.
scaffold00002	246311	.	T	A	NON_SYNONYMOUS_CODING	MODERATE	B9J08_005008	C2_02450C_A	UTP22	hypothetical protein	PF03813.9|Nrap[Nrap protein]	.	GO:0042493	.	.
scaffold00002	257409	.	G	A	NON_SYNONYMOUS_CODING	MODERATE	B9J08_005014	.	.	hypothetical protein	.	.	.	.	.
scaffold00002	294086	.	A	G	NON_SYNONYMOUS_CODING	MODERATE	B9J08_005032	C2_03070C_A	SMP3	hypothetical protein	PF03901.12|Glyco_transf_22[Alg9-like mannosyltransferase family]	EC:2.4.1.-[Hexosyltransferases.]	GO:0097502;GO:0006506;GO:0005783;EC:2.4.1.130;GO:0006276;GO:0004584;GO:0016021	.	TMH:5
scaffold00002	334731	.	C	G	NON_SYNONYMOUS_CODING	MODERATE	B9J08_005050	C3_02580C_A	.	hypothetical protein	PF10241.4|KxDL[Uncharacterized conserved protein]	.	.	.	.
scaffold00002	354184	.	A	T	NON_SYNONYMOUS_CODING	MODERATE	B9J08_005059	.	.	hypothetical protein	PF10407.4|Cytokin_check_N[Cdc14 phosphatase binding protein N-terminus]	.	.	.	.
scaffold00002	357267	.	G	A	NON_SYNONYMOUS_CODING	MODERATE	B9J08_005059	.	.	hypothetical protein	PF10407.4|Cytokin_check_N[Cdc14 phosphatase binding protein N-terminus]	.	.	.	.
scaffold00002	376911	.	G	C	NON_SYNONYMOUS_CODING	MODERATE	B9J08_005066	C2_08450W_A	.	hypothetical protein	.	.	.	.	.
scaffold00002	376995	.	G	A	NON_SYNONYMOUS_CODING	MODERATE	B9J08_005066	C2_08450W_A	.	hypothetical protein	.	.	.	.	.
scaffold00002	437720	.	A	C	NON_SYNONYMOUS_CODING	MODERATE	B9J08_005098	C7_01780W_A	LPI9	hypothetical protein	.	.	.	.	.
scaffold00002	498667	.	C	T	NON_SYNONYMOUS_CODING	MODERATE	B9J08_005124	C3_03800W_A	PTR22	hypothetical protein	PF00854.16|PTR2[POT family]	.	GO:0042937;GO:0042939;GO:0031520;GO:0000324;GO:0035442;GO:0016021;GO:0032153;GO:0071916	.	TMH:12
scaffold00002	516380	.	A	G	NON_SYNONYMOUS_CODING	MODERATE	B9J08_005132	CR_06720W_A	NMD3	60S ribosomal export protein NMD3	PF04981.8|NMD3[NMD3 family]	.	GO:0000055;GO:0005634;GO:0043023;GO:0022625	ko03013[RNA transport]	.
scaffold00002	604552	.	A	G	NON_SYNONYMOUS_CODING	MODERATE	B9J08_005181	C2_08070C_A	MRS4	hypothetical protein	PF00153.22|Mito_carr[Mitochondrial carrier protein]	.	GO:0055085;GO:0016021	.	.
scaffold00002	618100	.	T	A	NON_SYNONYMOUS_CODING	MODERATE	B9J08_005188	C2_08760C_A	TIF4631	hypothetical protein	PF02854.14|MIF4G[MIF4G domain];PF12152.3|eIF_4G1[Eukaryotic translation initiation factor 4G1]	.	GO:0010494;GO:0003723;GO:0005829	ko05416[Viral myocarditis]	.
scaffold00002	622157	.	A	T	NON_SYNONYMOUS_CODING	MODERATE	B9J08_005190	C2_08740W_A	.	hypothetical protein	PF13173.1|AAA_14[AAA domain];PF13207.1|AAA_17[AAA domain];PF00004.24|AAA[ATPase family associated with various cellular activities (AAA)];PF13238.1|AAA_18[AAA domain];PF13401.1|AAA_22[AAA domain];PF05496.7|RuvB_N[Holliday junction DNA helicase ruvB N-terminus];PF07724.9|AAA_2[AAA domain (Cdc48 subfamily)];PF07728.9|AAA_5[AAA domain (dynein-related subfamily)]	.	GO:0005524	.	.
scaffold00002	630108	.	A	G	NON_SYNONYMOUS_CODING	MODERATE	B9J08_005195	.	.	hypothetical protein	PF06413.6|Neugrin[Neugrin]	.	GO:0005634;GO:0005829;GO:0000002;GO:0005739	.	.
scaffold00002	631296	.	A	G	NON_SYNONYMOUS_CODING	MODERATE	B9J08_005196	C6_00130C_A	VID27	hypothetical protein	PF08553.5|VID27[VID27 cytoplasmic protein]	.	GO:0051716;GO:0042594;GO:0044182;GO:0009607	.	.
scaffold00002	686127	.	A	T	NON_SYNONYMOUS_CODING	MODERATE	B9J08_005217	C4_04870C_A	.	hypothetical protein	PF09770.4|PAT1[Topoisomerase II-associated protein PAT1]	.	GO:0010494;GO:0003729;GO:0005634;GO:0007059;GO:0061641;GO:0000290;GO:0000932;GO:0001731;GO:0045947;GO:0003682;GO:0033962;GO:0000776;GO:0022627	.	.
scaffold00002	692699	.	G	A	NON_SYNONYMOUS_CODING	MODERATE	B9J08_005220	C4_05260W_A	.	hypothetical protein	PF04762.7|IKI3[IKI3 family]	.	GO:0002098;GO:0005634;GO:0006355;GO:0033588;GO:0006351;GO:0005737	.	.
scaffold00002	733408	.	T	A	NON_SYNONYMOUS_CODING	MODERATE	B9J08_005235	C4_01670C_A	.	hypothetical protein	PF04177.7|TAP42[TAP42-like family]	.	GO:0031929;GO:0005634;GO:0019898;GO:0005829;GO:0045943;GO:0009966	.	.
scaffold00002	763675	.	G	C	NON_SYNONYMOUS_CODING	MODERATE	B9J08_005249	C1_11400C_A	GIN4	hypothetical protein	PF00069.20|Pkinase[Protein kinase domain];PF07714.12|Pkinase_Tyr[Protein tyrosine kinase]	.	GO:0001558;GO:0035690;GO:0005524;GO:0006468;GO:0005935;GO:0004672;GO:0044182;GO:0000131;GO:0005940;GO:0000921	.	.
scaffold00002	796544	.	G	A	NON_SYNONYMOUS_CODING	MODERATE	B9J08_005264	C7_00870W_A	.	guanine deaminase	PF01979.15|Amidohydro_1[Amidohydrolase family]	EC:3.5.4.3[Guanine deaminase.]	GO:0006147;GO:0008892;GO:0008270;EC:3.5.4.3	.	.
scaffold00002	855641	.	C	G	NON_SYNONYMOUS_CODING	MODERATE	B9J08_005293	.	.	hypothetical protein	.	.	.	.	.
scaffold00002	859671	.	T	A	NON_SYNONYMOUS_CODING	MODERATE	B9J08_005294	C5_05440C_A	.	hypothetical protein	PF00169.24|PH[PH domain]	.	.	.	.
scaffold00002	903524	.	A	G	NON_SYNONYMOUS_CODING	MODERATE	B9J08_005315	.	.	hypothetical protein	.	.	.	.	.
scaffold00002	922132	.	C	A	NON_SYNONYMOUS_CODING	MODERATE	B9J08_005323	C3_05380W_A	.	hypothetical protein	PF07690.11|MFS_1[Major Facilitator Superfamily]	.	GO:0055085;GO:0016021	.	TMH:10
scaffold00002	929091	.	T	C	NON_SYNONYMOUS_CODING	MODERATE	B9J08_005325	C2_03900C_A	.	hypothetical protein	.	.	GO:0042766;GO:0005829;GO:0031011	.	.
scaffold00002	991471	.	T	C	NON_SYNONYMOUS_CODING	MODERATE	B9J08_005353	C1_00990C_A	NMA111	hypothetical protein	PF00089.21|Trypsin[Trypsin];PF00595.19|PDZ[PDZ domain (Also known as DHR or GLGF)];PF12812.2|PDZ_1[PDZ-like domain];PF13365.1|Trypsin_2[Trypsin-like peptidase domain]	.	GO:0004252;GO:0005634;GO:0006508;EC:3.4.21;GO:0006915	.	.
scaffold00002	991660	.	C	T	NON_SYNONYMOUS_CODING	MODERATE	B9J08_005353	C1_00990C_A	NMA111	hypothetical protein	PF00089.21|Trypsin[Trypsin];PF00595.19|PDZ[PDZ domain (Also known as DHR or GLGF)];PF12812.2|PDZ_1[PDZ-like domain];PF13365.1|Trypsin_2[Trypsin-like peptidase domain]	.	GO:0004252;GO:0005634;GO:0006508;EC:3.4.21;GO:0006915	.	.
scaffold00002	1003124	.	G	A	NON_SYNONYMOUS_CODING	MODERATE	B9J08_005357	CR_04120C_A	.	hypothetical protein	PF05188.12|MutS_II[MutS domain II];PF05192.13|MutS_III[MutS domain III];PF00488.16|MutS_V[MutS domain V];PF01624.15|MutS_I[MutS domain I]	.	GO:0032139;GO:0032137;GO:0005524;GO:0006298;GO:0043504;GO:0008094;GO:0005739	.	.
scaffold00002	1040235	.	T	C	NON_SYNONYMOUS_CODING	MODERATE	B9J08_005376	C6_01770W_A	RAD18	DNA repair protein rad18	PF00097.20|zf-C3HC4[Zinc finger, C3HC4 type (RING finger)];PF13923.1|zf-C3HC4_2[Zinc finger, C3HC4 type (RING finger)];PF14835.1|zf-RING_6[zf-RING of BARD1-type protein];PF13639.1|zf-RING_2[Ring finger domain];TIGR00599[rad18: DNA repair protein rad18];PF02037.22|SAP[SAP domain]	EC:6.3.2.19[Ubiquitin--protein ligase.]	GO:0061630;GO:0003677;GO:0044773;GO:0016567;GO:0031144;GO:0006301	.	.
scaffold00002	1084684	.	A	G	NON_SYNONYMOUS_CODING	MODERATE	B9J08_005391	C6_01550C_A	.	hypothetical protein	PF00476.15|DNA_pol_A[DNA polymerase family A]	EC:2.7.7.7[DNA-directed DNA polymerase.]	GO:0003887;GO:0003677;GO:0071897;GO:0006260;EC:2.7.7.7;GO:0005760	.	.
scaffold00002	1095804	.	A	G	NON_SYNONYMOUS_CODING	MODERATE	B9J08_005396	C6_01190C_A	VPS15	hypothetical protein	PF00069.20|Pkinase[Protein kinase domain];PF07714.12|Pkinase_Tyr[Protein tyrosine kinase];PF00400.27|WD40[WD domain, G-beta repeat]	EC:2.7.11.1[Non-specific serine/threonine protein kinase.]	GO:0005524;GO:0071561;GO:0045053;GO:0032968;GO:0006623;GO:0000011;GO:0005739;GO:0034272;GO:0048017;GO:0006468;GO:0030242;GO:0045324;GO:0043130;GO:0004674;EC:2.7.11;GO:0034271;GO:0016236	.	.
scaffold00002	1098519	.	A	C	NON_SYNONYMOUS_CODING	MODERATE	B9J08_005397	C6_00620W_A	FCA1	hypothetical protein	PF00383.17|dCMP_cyt_deam_1[Cytidine and deoxycytidylate deaminase zinc-binding region]	EC:3.5.4.1[Cytosine deaminase.]	GO:0019858;GO:0005634;GO:0046087;GO:0008655;GO:0002100;GO:0004131;GO:0005737;EC:3.5.4.1;GO:0008270;GO:0008251	ko00330[Arginine and proline metabolism]	.
scaffold00002	1112570	.	G	T	NON_SYNONYMOUS_CODING	MODERATE	B9J08_005404	C6_01300W_A	.	hypothetical protein	PF01553.16|Acyltransferase[Acyltransferase]	.	GO:0005783;GO:0008152;GO:0016746;GO:0016021	.	TMH:2
scaffold00002	1132331	.	C	A	NON_SYNONYMOUS_CODING	MODERATE	B9J08_005410	C7_01350C_A	.	hypothetical protein	PF06644.6|ATP11[ATP11 protein]	.	GO:0033615;GO:0051082;GO:0005739	.	.
scaffold00002	1148912	.	G	A	NON_SYNONYMOUS_CODING	MODERATE	B9J08_005418	C7_00820W_A	RFC2	hypothetical protein	PF00004.24|AAA[ATPase family associated with various cellular activities (AAA)];PF13401.1|AAA_22[AAA domain];PF05496.7|RuvB_N[Holliday junction DNA helicase ruvB N-terminus];PF03215.10|Rad17[Rad17 cell cycle checkpoint protein];PF13177.1|DNA_pol3_delta2[DNA polymerase III, delta subunit];PF08542.6|Rep_fac_C[Replication factor C C-terminal domain]	.	GO:0006272;GO:0003677;GO:0031390;GO:0005663;GO:0005634;GO:0005524;GO:0033314;GO:0003887;GO:0071897;GO:0016787;GO:0007062;GO:0005829;GO:0031391;GO:0031389;EC:2.7.7.7;GO:0070914	ko03430[Mismatch repair];ko03420[Nucleotide excision repair]	.
scaffold00002	1252306	.	A	C	NON_SYNONYMOUS_CODING	MODERATE	B9J08_005463	C7_01180W_A	MDM12	hypothetical protein	.	.	GO:1990456;GO:0045040;GO:0005634;GO:0000001;GO:0032865;GO:0070096;GO:0005829;GO:0015914;GO:0000002;GO:0005789	.	.
scaffold00002	1253925	.	G	C	NON_SYNONYMOUS_CODING	MODERATE	B9J08_005464	C7_02490W_B	PEX1	hypothetical protein	PF00004.24|AAA[ATPase family associated with various cellular activities (AAA)];PF09262.6|PEX-1N[Peroxisome biogenesis factor 1, N-terminal]	.	GO:0005524;GO:0016562;GO:0046982;GO:0042623;GO:0005778	.	.
scaffold00002	1261701	.	A	G	NON_SYNONYMOUS_CODING	MODERATE	B9J08_005469	C7_02450W_A	.	hypothetical protein	PF06824.6|DUF1237[Protein of unknown function (DUF1237)]	.	GO:0005783;GO:0016021;GO:0003824	.	TMH:1
scaffold00002	1272141	.	T	A	NON_SYNONYMOUS_CODING	MODERATE	B9J08_005476	CR_03830C_A	MCM2	hypothetical protein	PF01078.16|Mg_chelatase[Magnesium chelatase, subunit ChlI];PF00493.18|MCM[MCM2/3/5 family];PF07728.9|AAA_5[AAA domain (dynein-related subfamily)];PF12619.3|MCM2_N[Mini-chromosome maintenance protein 2];PF14551.1|MCM_N[MCM N-terminal domain]	.	GO:0003688;GO:0000784;GO:0005524;GO:1902450;GO:0032508;GO:0005737;GO:0003697;GO:0031298;GO:0003682;GO:0005656;GO:0042555;GO:0000727;GO:0006270;GO:0000790;GO:0006271;GO:0031261;GO:0006267;GO:0003678	ko04113[Meiosis - yeast];ko04111[Cell cycle - yeast];ko04110[Cell cycle]	.
scaffold00011	31455	.	C	T	NON_SYNONYMOUS_CODING	MODERATE	B9J08_005555	.	.	hypothetical protein	PF00339.24|Arrestin_N[Arrestin (or S-antigen), N-terminal domain]	.	.	.	.
scaffold00012	11093	.	C	A	NON_SYNONYMOUS_CODING	MODERATE	B9J08_005570	C5_03060C_A	TNA1	hypothetical protein	PF07690.11|MFS_1[Major Facilitator Superfamily];PF00083.19|Sugar_tr[Sugar (and other) transporter]	.	GO:0055085;GO:0016021	.	TMH:12
scaffold00012	16071	.	T	G	NON_SYNONYMOUS_CODING	MODERATE	B9J08_005572	C5_03060C_A	TNA1	hypothetical protein	PF07690.11|MFS_1[Major Facilitator Superfamily]	.	GO:0055085;GO:0016021	.	TMH:12
scaffold00004	872126	.	T	C	DOWNSTREAM	MODIFIER	B9J08_000423	C5_01110W_A	.	hypothetical protein	PF02338.14|OTU[OTU-like cysteine protease]	.	GO:0005840;GO:0004843;GO:0005829;GO:0016579	.	.
scaffold00003	1215698	.	T	A	DOWNSTREAM	MODIFIER	B9J08_001051	.	.	hypothetical protein	PF00627.26|UBA[UBA/TS-N domain]	.	.	.	.
scaffold00008	486997	.	AGT	A	DOWNSTREAM	MODIFIER	B9J08_001754	C3_07610W_A	TIP120	hypothetical protein	PF08623.5|TIP120[TATA-binding protein interacting (TIP20)]	.	.	.	.
scaffold00010	411192	.	T	A	DOWNSTREAM	MODIFIER	B9J08_002133	C5_02560C_A	.	hypothetical protein	PF03109.11|ABC1[ABC1 family]	.	GO:0016021;GO:0016772	.	.
scaffold00009	761416	.	A	G	DOWNSTREAM	MODIFIER	B9J08_002576	.	.	hypothetical protein	PF00172.13|Zn_clus[Fungal Zn(2)-Cys(6) binuclear cluster domain]	.	GO:0006357;GO:0000981;GO:0005634;GO:0008270	.	.
scaffold00001	14870	.	GAACGGGAACGTCAACGGAATCGTA	G	DOWNSTREAM	MODIFIER	B9J08_002591	.	.	hypothetical protein	.	.	GO:0016021	.	TMH:1
scaffold00001	2222284	.	C	G	DOWNSTREAM	MODIFIER	B9J08_003662	C6_03960W_A	.	hypothetical protein	PF03571.10|Peptidase_M49[Peptidase family M49]	EC:3.4.14.4[Dipeptidyl-peptidase III.]	GO:0046872;GO:0005634;GO:0006508;GO:0005737;GO:0008239	.	.
scaffold00001	2793675	.	G	GAA	DOWNSTREAM	MODIFIER	B9J08_003921	C2_08050C_A	SIT1	hypothetical protein	PF06609.8|TRI12[Fungal trichothecene efflux pump (TRI12)]	.	GO:0006810;GO:0016021	.	TMH:12
scaffold00007	328	.	A	C	DOWNSTREAM	MODIFIER	B9J08_004103	.	.	hypothetical protein	.	.	.	.	.
scaffold00007	353083	.	C	T	DOWNSTREAM	MODIFIER	B9J08_004234	C1_08160W_A	.	hypothetical protein	PF04855.7|SNF5[SNF5 / SMARCB1 / INI1]	.	GO:0007059;GO:0033262;GO:0031055;GO:0006337;GO:0006302;GO:0006368;GO:0016586;GO:0005829;GO:0043044;GO:0000086	.	.
scaffold00002	681278	.	T	G	DOWNSTREAM	MODIFIER	B9J08_005216	C4_05030C_B	SSK2	hypothetical protein	PF14531.1|Kinase-like[Kinase-like];PF00069.20|Pkinase[Protein kinase domain];PF07714.12|Pkinase_Tyr[Protein tyrosine kinase]	EC:2.7.11.25[Mitogen-activated protein kinase kinase kinase.]	GO:0004709;GO:0005524;EC:2.7.11.25;GO:0005737;GO:0051403;GO:0000186	.	.
scaffold00002	683505	.	CA	C	DOWNSTREAM	MODIFIER	B9J08_005216	C4_05030C_B	SSK2	hypothetical protein	PF14531.1|Kinase-like[Kinase-like];PF00069.20|Pkinase[Protein kinase domain];PF07714.12|Pkinase_Tyr[Protein tyrosine kinase]	EC:2.7.11.25[Mitogen-activated protein kinase kinase kinase.]	GO:0004709;GO:0005524;EC:2.7.11.25;GO:0005737;GO:0051403;GO:0000186	.	.
scaffold00002	1182304	.	G	A	DOWNSTREAM	MODIFIER	B9J08_005429	.	.	hypothetical protein	.	.	GO:0045892;GO:0032502;GO:0003676;GO:0046872;GO:0036176;GO:0042594;GO:0048585;GO:1900429;GO:0044419;GO:0070887;GO:0036177	.	.
scaffold00001	731346	.	G	A	SYNONYMOUS_CODING	LOW	B9J08_002931	C3_05920W_A	MRR1	hypothetical protein	PF00172.13|Zn_clus[Fungal Zn(2)-Cys(6) binuclear cluster domain]	.	GO:0006357;GO:0003677;GO:0000981;GO:0005634;GO:0008270;GO:0006351	.	.
scaffold00008	242305	.	T	C	SYNONYMOUS_CODING	LOW	B9J08_001643	C2_00370W_A	PDR6	hypothetical protein	.	.	GO:0005643;GO:0008361;GO:0008565;GO:0006606;GO:0005737	.	.
scaffold00001	2134098	.	T	A	SYNONYMOUS_CODING	LOW	B9J08_003621	C1_08230C_A	PLB5	hypothetical protein	PF01735.13|PLA2_B[Lysophospholipase catalytic domain]	EC:3.1.1.5[Lysophospholipase.]	GO:0009395;GO:0004622;GO:0016020;EC:3.1.1.5	.	.
scaffold00007	616068	.	T	C	SYNONYMOUS_CODING	LOW	B9J08_004346	C4_03120C_A	BUB1	hypothetical protein	PF08171.6|Mad3_BUB1_II[Mad3/BUB1 homology region 2];PF08311.7|Mad3_BUB1_I[Mad3/BUB1 homology region 1]	EC:2.7.11.1[Non-specific serine/threonine protein kinase.]	GO:0007094	ko04113[Meiosis - yeast];ko04111[Cell cycle - yeast];ko04914[Progesterone-mediated oocyte maturation];ko04114[Oocyte meiosis]	.
scaffold00002	112428	.	C	T	SYNONYMOUS_CODING	LOW	B9J08_004944	C1_00830W_A	.	hypothetical protein	PF14667.1|Polysacc_synt_C[Polysaccharide biosynthesis C-terminal domain];PF01554.13|MatE[MatE]	.	GO:0016021;GO:0015238;GO:0015297;GO:0006855	.	TMH:11
scaffold00001	2249451	.	G	A	SYNONYMOUS_CODING	LOW	B9J08_003681	C6_02040W_A	MCR1	hypothetical protein	PF00970.19|FAD_binding_6[Oxidoreductase FAD-binding domain];PF00175.16|NAD_binding_1[Oxidoreductase NAD-binding domain]	EC:1.6.2.2[Cytochrome-b5 reductase.]	GO:0034599;GO:0031307;GO:0005758;EC:1.6.2.2;GO:0006696;GO:0055114;GO:0004128	.	.
scaffold00008	14967	.	A	G	SYNONYMOUS_CODING	LOW	B9J08_001533	C2_02970C_A	ALD5	hypothetical protein	PF00171.17|Aldedh[Aldehyde dehydrogenase family]	EC:1.2.1.3[Aldehyde dehydrogenase (NAD(+)).]	GO:0016620;GO:0055114	ko00330[Arginine and proline metabolism];ko00640[Propanoate metabolism];ko00040[Pentose and glucuronate interconversions];ko00380[Tryptophan metabolism];ko00903[Limonene and pinene degradation];ko00310[Lysine degradation];ko00280[Valine, leucine and isoleucine degradation];ko00410[beta-Alanine metabolism];ko00620[Pyruvate metabolism];ko00625[Chloroalkane and chloroalkene degradation];ko00071[Fatt…	.
scaffold00002	235910	.	T	G	SYNONYMOUS_CODING	LOW	B9J08_005003	C2_04980C_A	CKA2	casein kinase II subunit alpha'	PF00069.20|Pkinase[Protein kinase domain];PF01636.18|APH[Phosphotransferase enzyme family];PF07714.12|Pkinase_Tyr[Protein tyrosine kinase]	EC:2.7.11.1[Non-specific serine/threonine protein kinase.]	GO:0035690;GO:0005524;GO:0005956;GO:0007535;GO:0006974;GO:0034456;GO:0006359;GO:0006468;GO:0019722;GO:0006356;GO:0071470;GO:0004674;GO:0034599;GO:0051301;EC:2.7.11;GO:0009405;GO:0001300	ko04310[Wnt signaling pathway];ko04712[Circadian rhythm - plant];ko04530[Tight junction];ko05162[Measles];ko04520[Adherens junction]	.
scaffold00004	99768	.	G	A	SYNONYMOUS_CODING	LOW	B9J08_000043	C3_06290W_A	.	hypothetical protein	.	.	.	.	.
scaffold00004	121299	.	T	A	SYNONYMOUS_CODING	LOW	B9J08_000055	C1_02620C_A	HOM6	hypothetical protein	PF03447.11|NAD_binding_3[Homoserine dehydrogenase, NAD binding domain];PF00742.14|Homoserine_dh[Homoserine dehydrogenase];PF01118.19|Semialdhyde_dh[Semialdehyde dehydrogenase, NAD binding domain]	EC:1.1.1.3[Homoserine dehydrogenase.]	GO:0050661;EC:1.1.1.3;GO:0009090;GO:0009097;GO:0009088;GO:0055114;GO:0004412;GO:0009086	ko00270[Cysteine and methionine metabolism];ko00300[Lysine biosynthesis]	.
scaffold00004	210189	.	T	C	SYNONYMOUS_CODING	LOW	B9J08_000094	C2_09470C_A	PMS1	hypothetical protein	PF02518.21|HATPase_c[Histidine kinase-, DNA gyrase B-, and HSP90-like ATPase];PF08676.6|MutL_C[MutL C terminal dimerisation domain];PF13589.1|HATPase_c_3[Histidine kinase-, DNA gyrase B-, and HSP90-like ATPase];PF01119.14|DNA_mis_repair[DNA mismatch repair protein, C-terminal domain]	.	GO:0032389;GO:0000710;GO:0005524;GO:0030983;EC:3.6.1.3;GO:0016887	.	.
scaffold00004	221542	.	G	A	SYNONYMOUS_CODING	LOW	B9J08_000098	CR_08060C_A	VPS21	hypothetical protein	PF01926.18|MMR_HSR1[50S ribosome-binding GTPase];PF08477.8|Miro[Miro-like protein];PF00009.22|GTP_EFTU[Elongation factor Tu GTP binding domain];PF04670.7|Gtr1_RagA[Gtr1/RagA G protein conserved region];PF00025.16|Arf[ADP-ribosylation factor family];PF00071.17|Ras[Ras family]	.	GO:0032511;GO:0007038;GO:0036180;GO:0036010;GO:0005770;GO:0006895;GO:0005741;GO:0003924;GO:0036258;GO:0006623;GO:0007264;GO:0005829;GO:0006897;GO:0000011;GO:0005525;GO:0009405	.	.
scaffold00004	314914	.	G	A	SYNONYMOUS_CODING	LOW	B9J08_000146	C2_01650W_A	.	hypothetical protein	PF05063.9|MT-A70[MT-A70]	.	GO:0036396;GO:0005730;GO:0001734;GO:2000221;GO:0005737;GO:0080009	.	.
scaffold00004	346694	.	G	A	SYNONYMOUS_CODING	LOW	B9J08_000162	C2_01840C_A	RAD7	hypothetical protein	.	.	GO:0000113;GO:0000715;GO:0042787;GO:0031463	.	.
scaffold00004	380479	.	A	G	SYNONYMOUS_CODING	LOW	B9J08_000177	.	.	hypothetical protein	PF00400.27|WD40[WD domain, G-beta repeat]	.	GO:0070682;GO:0005634;GO:0006511;GO:0005829	.	.
scaffold00004	578310	.	A	T	SYNONYMOUS_CODING	LOW	B9J08_000282	C1_03250C_A	SPP1	hypothetical protein	PF00628.24|PHD[PHD-finger]	.	GO:0000781;GO:0051569;GO:0051568;GO:0035064;GO:0006348;GO:0048188;GO:0005829;GO:0003682;GO:0008270	.	.
scaffold00004	618670	.	A	G	SYNONYMOUS_CODING	LOW	B9J08_000303	C4_03920W_A	.	hypothetical protein	PF00789.15|UBX[UBX domain]	.	GO:0033523;GO:0005737;GO:0044695	.	TMH:1
scaffold00004	681433	.	T	C	SYNONYMOUS_CODING	LOW	B9J08_000336	.	.	hypothetical protein	.	.	.	.	.
scaffold00004	683579	.	G	C	SYNONYMOUS_CODING	LOW	B9J08_000336	.	.	hypothetical protein	.	.	.	.	.
scaffold00004	694476	.	T	A	SYNONYMOUS_CODING	LOW	B9J08_000340	C1_10010C_A	SWE1	hypothetical protein	PF00069.20|Pkinase[Protein kinase domain];PF07714.12|Pkinase_Tyr[Protein tyrosine kinase]	EC:2.7.11.1[Non-specific serine/threonine protein kinase.]	GO:0036289;GO:0038083;GO:0010697;GO:0005524;GO:0000320;GO:0072453;GO:0045835;GO:0004713;EC:2.7.12.1;GO:0005634;GO:0004712;GO:0044878;GO:0044732;GO:1902402;GO:0005935;GO:0004674;EC:2.7.11;GO:0071341;EC:2.7.10;GO:0000086;GO:0044387;GO:0000079	ko04113[Meiosis - yeast]	.
scaffold00004	699140	.	C	T	SYNONYMOUS_CODING	LOW	B9J08_000341	C1_10020W_A	SFU1	hypothetical protein	PF00320.22|GATA[GATA zinc finger]	.	GO:0001228;GO:0005634;GO:0030154;GO:0006355;GO:0006351;GO:0001085;GO:0005667;GO:0000977;GO:0003682;GO:0008270	.	.
scaffold00004	738409	.	T	C	SYNONYMOUS_CODING	LOW	B9J08_000364	C3_01310W_A	.	hypothetical protein	PF00271.26|Helicase_C[Helicase conserved C-terminal domain];PF00270.24|DEAD[DEAD/DEAH box helicase];PF00176.18|SNF2_N[SNF2 family N-terminal domain]	.	GO:0005524;GO:0006312	.	.
scaffold00004	763725	.	T	C	SYNONYMOUS_CODING	LOW	B9J08_000375	CR_05200C_A	.	hypothetical protein	.	.	GO:0016021	.	TMH:1
scaffold00004	798388	.	C	T	SYNONYMOUS_CODING	LOW	B9J08_000390	C2_00150W_A	LEU5	hypothetical protein	PF00153.22|Mito_carr[Mitochondrial carrier protein]	.	GO:0035349;GO:0015228;GO:0016021;GO:0005743	.	TMH:1
scaffold00004	984004	.	G	A	SYNONYMOUS_CODING	LOW	B9J08_000463	CR_07640C_A	.	hypothetical protein	PF08432.5|Vfa1[AAA-ATPase Vps4-associated protein 1]	.	.	.	.
scaffold00004	1005345	.	T	C	SYNONYMOUS_CODING	LOW	B9J08_000474	CR_07090W_A	STT4	hypothetical protein	PF00454.22|PI3_PI4_kinase[Phosphatidylinositol 3- and 4-kinase];PF00613.15|PI3Ka[Phosphoinositide 3-kinase family, accessory domain (PIK domain)]	EC:2.7.1.67[1-phosphatidylinositol 4-kinase.]	GO:0016310;GO:0016301;GO:0044464	ko04070[Phosphatidylinositol signaling system]	.
scaffold00003	207384	.	C	T	SYNONYMOUS_CODING	LOW	B9J08_000602	C1_10490W_A	LKH1	leukotriene A-4 hydrolase/aminopeptidase	PF13485.1|Peptidase_MA_2[Peptidase MA superfamily];PF09127.6|Leuk-A4-hydro_C[Leukotriene A4 hydrolase, C-terminal];PF01433.15|Peptidase_M1[Peptidase family M1];TIGR02411[leuko_A4_hydro: leukotriene A-4 hydrolase/aminopeptidase]	EC:3.3.2.6[Leukotriene-A(4) hydrolase.]	GO:0004463;GO:0004301;GO:0043171;GO:0005737;EC:3.4.11;GO:0004177;GO:0008237;GO:0006508;EC:3.3.2.10;GO:0008270;EC:3.3.2.6	.	.
scaffold00003	222636	.	T	C	SYNONYMOUS_CODING	LOW	B9J08_000610	C1_06520C_A	BPH1	hypothetical protein	PF14844.1|PH_BEACH[PH domain associated with Beige/BEACH];PF02138.13|Beach[Beige/BEACH domain]	.	GO:0006886;GO:0009268;GO:0019898;GO:0005829;GO:0031505;GO:0005739	.	.
scaffold00003	306614	.	C	T	SYNONYMOUS_CODING	LOW	B9J08_000653	C1_01710W_A	.	hypothetical protein	.	.	.	.	.
scaffold00003	358399	.	C	G	SYNONYMOUS_CODING	LOW	B9J08_000675	.	.	hypothetical protein	PF07691.7|PA14[PA14 domain]	.	.	.	.
scaffold00003	559855	.	C	T	SYNONYMOUS_CODING	LOW	B9J08_000765	C4_01190W_A	CAS5	hypothetical protein	PF13894.1|zf-C2H2_4[C2H2-type zinc finger];PF00096.21|zf-C2H2[Zinc finger, C2H2 type];PF12874.2|zf-met[Zinc-finger of C2H2 type];PF13465.1|zf-H2C2_2[Zinc-finger double domain]	.	GO:0046872;GO:0003676	.	.
scaffold00003	655734	.	T	C	SYNONYMOUS_CODING	LOW	B9J08_000803	CR_06180W_A	ARC40	hypothetical protein	PF00400.27|WD40[WD domain, G-beta repeat]	.	GO:0000281;GO:0043130;GO:0051286;GO:0030479;GO:0005885;GO:0034314;GO:0005829;GO:0032153	ko05131[Shigellosis];ko05130[Pathogenic Escherichia coli infection];ko04810[Regulation of actin cytoskeleton];ko05100[Bacterial invasion of epithelial cells]	.
scaffold00003	701776	.	A	G	SYNONYMOUS_CODING	LOW	B9J08_000826	C3_06610W_A	.	hypothetical protein	.	.	.	.	.
scaffold00003	724347	.	T	C	SYNONYMOUS_CODING	LOW	B9J08_000837	C7_00320C_A	PMR1	calcium-transporting P-type ATPase%2C PMR1-type	PF13246.1|Hydrolase_like2[Putative hydrolase of sodium-potassium ATPase alpha subunit];PF00689.16|Cation_ATPase_C[Cation transporting ATPase, C-terminus];PF00690.21|Cation_ATPase_N[Cation transporter/ATPase, N-terminus];TIGR01522[ATPase-IIA2_Ca: calcium-transporting P-type ATPase, PMR1-type];PF00702.21|Hydrolase[haloacid dehalogenase-like hydrolase];PF12710.2|HAD[haloacid dehalogenase-like hydrol…	EC:3.6.3.8[Calcium-transporting ATPase.]	GO:0071421;GO:0006486;GO:0071260;GO:0005524;EC:3.6.3.8;GO:0015410;GO:0000139;GO:0005829;GO:0016021;GO:0061454;GO:0005886;GO:0005388;GO:0030448;GO:0031505;EC:3.6.3.35;GO:0005509;GO:0044182;GO:0005789;GO:0006887	.	TMH:8
scaffold00003	732844	.	T	C	SYNONYMOUS_CODING	LOW	B9J08_000840	C4_07240W_A	.	hypothetical protein	PF08507.5|COPI_assoc[COPI associated protein]	.	GO:0030173;GO:0016192	.	TMH:4
scaffold00003	787449	.	T	C	SYNONYMOUS_CODING	LOW	B9J08_000868	C2_04140W_A	CHS5	hypothetical protein	PF12738.2|PTCB-BRCT[twin BRCT domain];PF00533.21|BRCT[BRCA1 C Terminus (BRCT) domain]	.	GO:0032220;GO:0030476;GO:0032219;GO:0006355;GO:0043332;GO:0034044;GO:0006893;GO:0006031;GO:0006039;GO:0005829;GO:0000282;GO:0009250	.	.
scaffold00003	813798	.	C	T	SYNONYMOUS_CODING	LOW	B9J08_000880	C2_05790C_A	RFC1	hypothetical protein	PF00533.21|BRCT[BRCA1 C Terminus (BRCT) domain];PF00004.24|AAA[ATPase family associated with various cellular activities (AAA)];PF03215.10|Rad17[Rad17 cell cycle checkpoint protein];PF08519.7|RFC1[Replication factor RFC1 C terminal domain]	.	GO:0005663;GO:0006281;GO:0005524;GO:0003689;GO:0006260	ko03430[Mismatch repair];ko03420[Nucleotide excision repair]	.
scaffold00003	1132716	.	A	G	SYNONYMOUS_CODING	LOW	B9J08_001017	C7_00290C_A	HGT13	hypothetical protein	PF07690.11|MFS_1[Major Facilitator Superfamily];PF00083.19|Sugar_tr[Sugar (and other) transporter]	.	GO:0055085;GO:0016021;GO:0022857	.	TMH:10
scaffold00005	8943	.	T	A	SYNONYMOUS_CODING	LOW	B9J08_001066	C6_02430W_A	.	hypothetical protein	PF15613.1|WHIM2[WSTF, HB1, Itc1p, MBD9 motif 2];PF10537.4|WAC_Acf1_DNA_bd[ATP-utilising chromatin assembly and remodelling N-terminal];PF02791.12|DDT[DDT domain]	.	.	.	.
scaffold00005	109817	.	A	G	SYNONYMOUS_CODING	LOW	B9J08_001117	C6_01160W_A	RCN1	hypothetical protein	PF04847.7|Calcipressin[Calcipressin]	.	GO:0019722;GO:0005622	.	.
scaffold00005	112689	.	C	G	SYNONYMOUS_CODING	LOW	B9J08_001119	.	.	hypothetical protein	.	.	.	.	.
scaffold00005	156706	.	T	C	SYNONYMOUS_CODING	LOW	B9J08_001137	C2_07320W_A	ARP3	hypothetical protein	PF00022.14|Actin[Actin]	.	GO:1903475;GO:0000147;GO:0005885;GO:0035690;GO:0034314;GO:0005524;GO:0051666;GO:0032153;GO:0051285;GO:0001411;GO:0030479;GO:0005829;GO:0030041	.	.
scaffold00005	465890	.	A	C	SYNONYMOUS_CODING	LOW	B9J08_001285	C6_01790C_A	ZCF18	hypothetical protein	PF00172.13|Zn_clus[Fungal Zn(2)-Cys(6) binuclear cluster domain]	.	.	.	.
scaffold00005	514453	.	G	T	SYNONYMOUS_CODING	LOW	B9J08_001302	C5_00210C_A	BRE1	hypothetical protein	PF00097.20|zf-C3HC4[Zinc finger, C3HC4 type (RING finger)];PF13923.1|zf-C3HC4_2[Zinc finger, C3HC4 type (RING finger)];PF13920.1|zf-C3HC4_3[Zinc finger, C3HC4 type (RING finger)];PF13639.1|zf-RING_2[Ring finger domain];PF14634.1|zf-RING_5[zinc-RING finger domain];PF08647.6|BRE1[BRE1 E3 ubiquitin ligase]	EC:6.3.2.19[Ubiquitin--protein ligase.]	GO:0031571;GO:0010390;GO:0003688;GO:0030174;GO:0000781;GO:0036170;GO:0009267;GO:0031573;GO:0042138;GO:0008270;GO:0000722;GO:0036180;GO:0042802;GO:0000790;GO:0006348;GO:0004842;GO:0006366;GO:0000724	.	.
scaffold00005	669131	.	A	G	SYNONYMOUS_CODING	LOW	B9J08_001371	C1_09200W_A	LYS142	hypothetical protein	PF00172.13|Zn_clus[Fungal Zn(2)-Cys(6) binuclear cluster domain];PF11951.3|Fungal_trans_2[Fungal specific transcription factor domain]	.	GO:0000981;GO:0000978;GO:0005634;GO:0045944;GO:0008270;GO:0016021;GO:2001196	.	TMH:1
scaffold00005	795175	.	C	T	SYNONYMOUS_CODING	LOW	B9J08_001428	C6_03390W_A	.	hypothetical protein	PF00153.22|Mito_carr[Mitochondrial carrier protein]	.	GO:0005310;GO:0005740;GO:0055085;GO:0006835;GO:0016021	.	.
scaffold00005	982969	.	T	A	SYNONYMOUS_CODING	LOW	B9J08_001506	C6_04650W_A	.	hypothetical protein	PF04389.12|Peptidase_M28[Peptidase family M28]	.	GO:0046872;GO:0000329;GO:0006508;GO:0008237;GO:0005829;GO:0016021	.	TMH:9
scaffold00008	71689	.	G	A	SYNONYMOUS_CODING	LOW	B9J08_001560	C7_02930C_A	.	hypothetical protein	PF04194.8|PDCD2_C[Programmed cell death protein 2, C-terminal putative domain]	.	GO:0005730;GO:0005829;GO:0030490	.	.
scaffold00008	136031	.	G	A	SYNONYMOUS_CODING	LOW	B9J08_001586	C1_07270W_A	SEC34	hypothetical protein	PF04136.10|Sec34[Sec34-like family]	.	GO:0016020;GO:0032258;GO:0030242;GO:0032153;GO:0005801;GO:0000301;GO:0006886;GO:0017119;GO:0006888;GO:0016236	.	.
scaffold00008	263722	.	G	A	SYNONYMOUS_CODING	LOW	B9J08_001653	C4_05690W_A	SEC23	protein transporter SEC23	PF08033.7|Sec23_BS[Sec23/Sec24 beta-sandwich domain];PF04811.10|Sec23_trunk[Sec23/Sec24 trunk domain];PF00626.17|Gelsolin[Gelsolin repeat];PF04810.10|zf-Sec23_Sec24[Sec23/Sec24 zinc finger];PF04815.10|Sec23_helical[Sec23/Sec24 helical domain]	.	GO:0043547;GO:0003400;GO:0000139;GO:0006886;GO:0030127;GO:0008270;GO:0005789;GO:0006888;GO:0005096	.	.
scaffold00008	265354	.	T	C	SYNONYMOUS_CODING	LOW	B9J08_001655	CR_09490W_A	.	hypothetical protein	PF11496.3|HDA2-3[Class II histone deacetylase complex subunits 2 and 3]	.	GO:0003677;GO:0007059;GO:0031047;GO:0010978;GO:0070823;GO:0000122;GO:0005829;GO:0003682;GO:0016575	.	.
scaffold00008	272373	.	G	A	SYNONYMOUS_CODING	LOW	B9J08_001658	C6_02860W_A	STE23	hypothetical protein	PF05193.16|Peptidase_M16_C[Peptidase M16 inactive domain];PF00675.15|Peptidase_M16[Insulinase (Peptidase family M16)]	EC:3.4.99.-[Endopeptidases of unknown catalytic mechanism.]	EC:3.4.24;GO:0046872;GO:0006508;GO:0004222	.	.
scaffold00008	334294	.	T	G	SYNONYMOUS_CODING	LOW	B9J08_001684	C3_03790W_A	MEU1	S-methyl-5'-thioadenosine phosphorylase	TIGR01694[MTAP: methylthioadenosine phosphorylase];PF01048.15|PNP_UDP_1[Phosphorylase superfamily]	EC:2.4.2.28[S-methyl-5'-thioadenosine phosphorylase.]	GO:0003729;GO:0005634;GO:0017061;GO:0005829;GO:0006537;GO:0006166;GO:0019509;EC:2.4.2.28	.	.
scaffold00008	407025	.	G	A	SYNONYMOUS_CODING	LOW	B9J08_001718	C1_11940C_A	.	hypothetical protein	PF13855.1|LRR_8[Leucine rich repeat]	.	.	.	.
scaffold00008	499405	.	C	T	SYNONYMOUS_CODING	LOW	B9J08_001760	.	.	hypothetical protein	PF10680.4|RRN9[RNA polymerase I specific transcription initiation factor]	.	.	.	.
scaffold00008	690856	.	A	T	SYNONYMOUS_CODING	LOW	B9J08_001855	C1_12170C_A	.	hypothetical protein	PF03162.8|Y_phosphatase2[Tyrosine phosphatase family]	.	.	.	.
scaffold00008	772092	.	T	C	SYNONYMOUS_CODING	LOW	B9J08_001899	C1_08210C_A	MLT1	hypothetical protein	PF00005.22|ABC_tran[ABC transporter];PF00664.18|ABC_membrane[ABC transporter transmembrane region]	.	GO:0005774;GO:0035672;GO:0000166;GO:0042626;GO:0007034	.	TMH:15
scaffold00008	812719	.	A	G	SYNONYMOUS_CODING	LOW	B9J08_001917	C3_06010W_A	CAM1	hypothetical protein	PF14497.1|GST_C_3[Glutathione S-transferase, C-terminal domain];PF13410.1|GST_C_2[Glutathione S-transferase, C-terminal domain];PF00043.20|GST_C[Glutathione S-transferase, C-terminal domain];PF00647.14|EF1G[Elongation factor 1 gamma, conserved domain]	.	GO:0004364;GO:0006749;GO:0005634;GO:0003746;GO:0006414;EC:2.5.1.18;GO:0005737	.	.
scaffold00010	65291	.	C	T	SYNONYMOUS_CODING	LOW	B9J08_001971	CR_04830C_A	.	hypothetical protein	PF12632.2|Vezatin[Mysoin-binding motif of peroxisomes]	.	GO:0017022	.	.
scaffold00010	117434	.	G	A	SYNONYMOUS_CODING	LOW	B9J08_001998	CR_02020C_A	OPT1	OPT family small oligopeptide transporter	PF03169.10|OPT[OPT oligopeptide transporter protein];TIGR00727[ISP4_OPT: small oligopeptide transporter, OPT family]	.	GO:0055085;GO:0016021	.	TMH:14
scaffold00010	124808	.	C	T	SYNONYMOUS_CODING	LOW	B9J08_002000	C1_04040C_A	.	nucleolar protein 9	PF00806.14|PUF[Pumilio-family RNA binding repeat]	.	GO:0003723;GO:0030686;GO:0000472;GO:0005730;GO:0000056;GO:0030688;GO:0000447;GO:0000480	.	.
scaffold00010	211070	.	A	G	SYNONYMOUS_CODING	LOW	B9J08_002041	C4_00970C_A	MDN1	hypothetical protein	PF00004.24|AAA[ATPase family associated with various cellular activities (AAA)];PF07728.9|AAA_5[AAA domain (dynein-related subfamily)];PF07726.6|AAA_3[ATPase family associated with various cellular activities (AAA)]	.	GO:0042254;GO:0005634;GO:0000166;GO:0009987;GO:0044446	.	.
scaffold00010	266180	.	A	T	SYNONYMOUS_CODING	LOW	B9J08_002068	C2_09230C_A	KIS1	hypothetical protein	PF04739.10|AMPKBI[5'-AMP-activated protein kinase beta subunit, interation domain]	.	GO:0030159;GO:0035690;GO:0007165;GO:0005829;GO:0006109	.	.
scaffold00010	308102	.	A	G	SYNONYMOUS_CODING	LOW	B9J08_002086	CR_07850W_A	.	hypothetical protein	.	.	.	.	.
scaffold00010	345520	.	C	T	SYNONYMOUS_CODING	LOW	B9J08_002106	C1_14310W_A	.	hypothetical protein	PF00383.17|dCMP_cyt_deam_1[Cytidine and deoxycytidylate deaminase zinc-binding region]	EC:3.5.4.12[dCMP deaminase.]	EC:3.5.4.12;GO:0004132;GO:0005634;GO:0006231;GO:0005829;GO:0008270;GO:0006226	.	.
scaffold00010	369904	.	C	G	SYNONYMOUS_CODING	LOW	B9J08_002116	C7_03670W_A	DED81	asparagine-tRNA ligase%2C cytoplasmic	TIGR00457[asnS: asparagine--tRNA ligase];PF00152.15|tRNA-synt_2[tRNA synthetases class II (D, K and N)];PF01336.20|tRNA_anti-codon[OB-fold nucleic acid binding domain]	EC:6.1.1.22[Asparagine--tRNA ligase.]	GO:0006421;GO:0005524;GO:0005829;EC:6.1.1.22;GO:0004816;GO:0003676	.	.
scaffold00010	384269	.	A	G	SYNONYMOUS_CODING	LOW	B9J08_002124	C3_06100C_A	DED1	ATP-dependent RNA helicase DED1	PF00271.26|Helicase_C[Helicase conserved C-terminal domain];PF00270.24|DEAD[DEAD/DEAH box helicase]	EC:3.6.4.13[RNA helicase.]	GO:0006413;GO:0003743;GO:0005524;GO:0005737;GO:0008026	.	.
scaffold00010	450158	.	C	G	SYNONYMOUS_CODING	LOW	B9J08_002150	CR_01000C_A	SLN1	hypothetical protein	PF00512.20|HisKA[His Kinase A (phospho-acceptor) domain];PF00072.19|Response_reg[Response regulator receiver domain];PF02518.21|HATPase_c[Histidine kinase-, DNA gyrase B-, and HSP90-like ATPase]	EC:2.7.13.3[Histidine kinase.]	GO:0023014;GO:0018106;GO:0005622;GO:0046777;GO:0000155;GO:0006469;GO:0005887;GO:0005034;GO:0009927;GO:0007234	.	TMH:3
scaffold00010	613215	.	C	G	SYNONYMOUS_CODING	LOW	B9J08_002226	C4_06510C_A	CSO99	hypothetical protein	.	.	GO:0016021	.	.
scaffold00009	27286	.	A	G	SYNONYMOUS_CODING	LOW	B9J08_002247	.	.	hypothetical protein	.	.	.	.	.
scaffold00009	300211	.	G	A	SYNONYMOUS_CODING	LOW	B9J08_002363	C3_00880W_A	KGD1	2-oxoglutarate dehydrogenase%2C mitochondrial	TIGR00239[2oxo_dh_E1: oxoglutarate dehydrogenase (succinyl-transferring), E1 component];PF00676.15|E1_dh[Dehydrogenase E1 component];PF02779.19|Transket_pyr[Transketolase, pyrimidine binding domain]	EC:1.2.4.2[Oxoglutarate dehydrogenase (succinyl-transferring).]	GO:0006099;EC:1.2.4.2;GO:0004591;GO:0030976	ko00380[Tryptophan metabolism];ko00310[Lysine degradation]	.
scaffold00009	321304	.	T	C	SYNONYMOUS_CODING	LOW	B9J08_002376	C3_06600C_A	.	hypothetical protein	PF14881.1|Tubulin_3[Tubulin domain];PF10644.4|Misat_Tub_SegII[Misato Segment II tubulin-like domain]	.	GO:0006276;GO:0005829;GO:0000002;GO:0003924	.	.
scaffold00009	361053	.	A	G	SYNONYMOUS_CODING	LOW	B9J08_002398	C2_09710C_A	.	hypothetical protein	PF00790.14|VHS[VHS domain];PF03127.9|GAT[GAT domain]	.	GO:0006886;GO:0007015;GO:0030479;GO:0044732;GO:0006897;GO:0051666	.	.
scaffold00009	373716	.	C	T	SYNONYMOUS_CODING	LOW	B9J08_002403	CR_09520C_A	.	hypothetical protein	.	.	GO:0030472;GO:0005938;GO:0005816;GO:0000778;GO:0005200;GO:0008017;GO:0007020;GO:0005876	.	.
scaffold00009	428633	.	C	A	SYNONYMOUS_CODING	LOW	B9J08_002426	C2_09040W_A	.	hypothetical protein	PF02037.22|SAP[SAP domain]	.	.	.	.
scaffold00009	440846	.	T	C	SYNONYMOUS_CODING	LOW	B9J08_002433	C2_08970C_A	DFG10	hypothetical protein	PF02544.11|Steroid_dh[3-oxo-5-alpha-steroid 4-dehydrogenase]	EC:1.3.99.5[3-oxo-5-alpha-steroid 4-dehydrogenase.]	GO:0007124;GO:0016627;GO:0019408;GO:0055114;GO:0006488;GO:0005737;GO:0016095;GO:0016021	.	TMH:6
scaffold00009	656795	.	G	T	SYNONYMOUS_CODING	LOW	B9J08_002527	C1_05180C_A	.	hypothetical protein	PF05676.8|NDUF_B7[NADH-ubiquinone oxidoreductase B18 subunit (NDUFB7)]	EC:1.6.99.3[NADH dehydrogenase.];EC:1.6.5.3[NADH:ubiquinone reductase (H(+)-translocating).]	EC:1.6.5.3;GO:0005739;GO:0055114;GO:0008137	ko05016[Huntington's disease];ko05010[Alzheimer's disease];ko05012[Parkinson's disease]	.
scaffold00009	769481	.	T	C	SYNONYMOUS_CODING	LOW	B9J08_002582	C3_06320W_A	ALS7	hypothetical protein	PF11766.3|Candida_ALS_N[Cell-wall agglutinin N-terminal ligand-sugar binding];PF05792.8|Candida_ALS[Candida agglutinin-like (ALS)]	.	GO:0007155	.	.
scaffold00009	776112	.	G	C	SYNONYMOUS_CODING	LOW	B9J08_002584	.	.	hypothetical protein	.	.	.	.	.
scaffold00001	111694	.	C	T	SYNONYMOUS_CODING	LOW	B9J08_002637	C3_02170C_A	LAP41	hypothetical protein	PF02127.10|Peptidase_M18[Aminopeptidase I zinc metalloprotease (M18)]	EC:3.4.11.22[Aminopeptidase I.]	GO:0006508;GO:0000324;GO:0042802;GO:0008270;GO:0070006	.	.
scaffold00001	128474	.	A	G	SYNONYMOUS_CODING	LOW	B9J08_002647	CR_03590C_A	.	hypothetical protein	PF01230.18|HIT[HIT domain];PF11969.3|DcpS_C[Scavenger mRNA decapping enzyme C-term binding]	EC:3.-.-.-[Hydrolases.]	GO:0003697;GO:0006281;GO:0000738;GO:0005829;GO:0030983;GO:0008270;GO:0033699;GO:1990165	.	.
scaffold00001	197624	.	C	G	SYNONYMOUS_CODING	LOW	B9J08_002670	CR_00190W_A	NGS1	hypothetical protein	PF00933.16|Glyco_hydro_3[Glycosyl hydrolase family 3 N terminal domain]	EC:3.2.1.52[Beta-N-acetylhexosaminidase.]	GO:0004553;GO:0005975	.	.
scaffold00001	285417	.	A	G	SYNONYMOUS_CODING	LOW	B9J08_002710	C7_03220C_A	ZCF29	hypothetical protein	PF04082.13|Fungal_trans[Fungal specific transcription factor domain];PF00172.13|Zn_clus[Fungal Zn(2)-Cys(6) binuclear cluster domain]	.	GO:0003677;GO:0005634;GO:0008270;GO:0006351	.	.
scaffold00001	298183	.	T	C	SYNONYMOUS_CODING	LOW	B9J08_002714	C7_03270W_B	.	hypothetical protein	PF05383.12|La[La domain]	.	GO:0005829	.	.
scaffold00001	372179	.	A	T	SYNONYMOUS_CODING	LOW	B9J08_002756	.	.	hypothetical protein	PF07915.8|PRKCSH[Glucosidase II beta subunit-like protein]	.	.	.	.
scaffold00001	378624	.	G	C	SYNONYMOUS_CODING	LOW	B9J08_002759	CR_10140W_A	.	NADH dehydrogenase (quinone)%2C G subunit	TIGR01973[NuoG: NADH dehydrogenase (quinone), G subunit];PF10588.4|NADH-G_4Fe-4S_3[NADH-ubiquinone oxidoreductase-G iron-sulfur binding region];PF09326.6|DUF1982[Domain of unknown function (DUF1982)];PF13510.1|Fer2_4[2Fe-2S iron-sulfur cluster binding domain];PF00384.17|Molybdopterin[Molybdopterin oxidoreductase];PF00111.22|Fer2[2Fe-2S iron-sulfur cluster binding domain]	EC:1.6.99.3[NADH dehydrogenase.];EC:1.6.5.3[NADH:ubiquinone reductase (H(+)-translocating).]	GO:0009055;GO:0016020;EC:1.6.5.3;GO:0042773;GO:0051536;GO:0008137	ko05016[Huntington's disease];ko05010[Alzheimer's disease];ko05012[Parkinson's disease]	.
scaffold00001	387655	.	T	C	SYNONYMOUS_CODING	LOW	B9J08_002762	CR_10100C_A	INO1	inositol-3-phosphate synthase	PF01658.12|Inos-1-P_synth[Myo-inositol-1-phosphate synthase];PF07994.7|NAD_binding_5[Myo-inositol-1-phosphate synthase]	EC:5.5.1.4[Inositol-3-phosphate synthase.]	GO:0008654;GO:0006021;GO:0030446;GO:0009986;EC:5.5.1.4;GO:0004512;GO:0005737	ko00562[Inositol phosphate metabolism]	.
scaffold00001	457940	.	G	A	SYNONYMOUS_CODING	LOW	B9J08_002798	C2_07090C_A	OLE2	hypothetical protein	PF00487.19|FA_desaturase[Fatty acid desaturase];PF00173.23|Cyt-b5[Cytochrome b5-like Heme/Steroid binding domain]	.	EC:1.14.19.1;GO:0016021;GO:0004768;GO:0055114;GO:0001516	.	TMH:4
scaffold00001	568924	.	A	T	SYNONYMOUS_CODING	LOW	B9J08_002853	C3_00750W_B	LYS144	hypothetical protein	PF00172.13|Zn_clus[Fungal Zn(2)-Cys(6) binuclear cluster domain];PF11951.3|Fungal_trans_2[Fungal specific transcription factor domain]	.	GO:0006357;GO:0000981;GO:0005634;GO:0008270	.	.
scaffold00001	649878	.	A	G	SYNONYMOUS_CODING	LOW	B9J08_002888	C1_08220W_A	CCR4	hypothetical protein	PF00560.28|LRR_1[Leucine Rich Repeat];PF12799.2|LRR_4[Leucine Rich repeats (2 copies)];PF03372.18|Exo_endo_phos[Endonuclease/Exonuclease/phosphatase family];PF13504.1|LRR_7[Leucine rich repeat];PF13855.1|LRR_8[Leucine rich repeat]	.	GO:0003723;GO:0036170;GO:0009267;EC:3.1.13.4;GO:0000932;GO:0006368;GO:0032968;GO:0090503;GO:0000289;GO:0009272;GO:0055091;GO:0004535;GO:0007089;GO:0036180;GO:0071216;GO:0016593;GO:0048478;GO:0030015;GO:0000076;GO:0046872;GO:0009405	.	.
scaffold00001	677688	.	A	G	SYNONYMOUS_CODING	LOW	B9J08_002901	C3_06710W_A	.	hypothetical protein	PF00324.16|AA_permease[Amino acid permease]	.	GO:0034486;GO:0097638;GO:0055075;GO:1903401;GO:0015379;GO:0031166;GO:1902476	.	TMH:11
scaffold00001	739807	.	G	A	SYNONYMOUS_CODING	LOW	B9J08_002937	C5_03240W_A	BUB3	hypothetical protein	PF00400.27|WD40[WD domain, G-beta repeat]	.	GO:0043130;GO:0033597;GO:0000778;GO:0044774;GO:0034613;GO:0072480;GO:1990298	ko04111[Cell cycle - yeast]	.
scaffold00001	983407	.	C	T	SYNONYMOUS_CODING	LOW	B9J08_003068	C6_02130C_A	CTF5	hypothetical protein	PF09496.5|CENP-O[Cenp-O kinetochore centromere component]	.	GO:0034508;GO:0034087;GO:0000817	.	.
scaffold00001	1163323	.	G	A	SYNONYMOUS_CODING	LOW	B9J08_003167	C1_00410C_A	.	hypothetical protein	PF00171.17|Aldedh[Aldehyde dehydrogenase family]	EC:1.2.1.3[Aldehyde dehydrogenase (NAD(+)).]	EC:1.2.99.6;GO:0016620;GO:0031307;GO:0005811;GO:0047770;GO:0055114	ko00330[Arginine and proline metabolism];ko00640[Propanoate metabolism];ko00040[Pentose and glucuronate interconversions];ko00380[Tryptophan metabolism];ko00903[Limonene and pinene degradation];ko00310[Lysine degradation];ko00280[Valine, leucine and isoleucine degradation];ko00410[beta-Alanine metabolism];ko00620[Pyruvate metabolism];ko00625[Chloroalkane and chloroalkene degradation];ko00071[Fatt…	.
scaffold00001	1168656	.	T	C	SYNONYMOUS_CODING	LOW	B9J08_003172	C1_00480C_A	GCN20	protein GCN20	PF00005.22|ABC_tran[ABC transporter];PF13304.1|AAA_21[AAA domain];PF12848.2|ABC_tran_2[ABC transporter]	.	GO:0016310;GO:0005524;GO:0016301;GO:0005829;EC:3.6.1.3;GO:0016887	.	.
scaffold00001	1217822	.	A	G	SYNONYMOUS_CODING	LOW	B9J08_003195	C2_01200C_A	REG1	hypothetical protein	PF08550.5|DUF1752[Fungal protein of unknown function (DUF1752)]	.	GO:0000329;GO:0007039;GO:0005829;GO:0006109;GO:0061587;GO:0042149	.	.
scaffold00001	1315405	.	A	T	SYNONYMOUS_CODING	LOW	B9J08_003239	C1_00600W_A	APC1	hypothetical protein	PF12859.2|Apc1[Anaphase-promoting complex subunit 1]	.	GO:0031145;GO:0010458;GO:0005829;GO:0016567;GO:0007091;GO:0004842;GO:0005680	ko04113[Meiosis - yeast];ko04120[Ubiquitin mediated proteolysis];ko04111[Cell cycle - yeast];ko04914[Progesterone-mediated oocyte maturation];ko04114[Oocyte meiosis]	.
scaffold00001	1319101	.	C	T	SYNONYMOUS_CODING	LOW	B9J08_003239	C1_00600W_A	APC1	hypothetical protein	PF12859.2|Apc1[Anaphase-promoting complex subunit 1]	.	GO:0031145;GO:0010458;GO:0005829;GO:0016567;GO:0007091;GO:0004842;GO:0005680	ko04113[Meiosis - yeast];ko04120[Ubiquitin mediated proteolysis];ko04111[Cell cycle - yeast];ko04914[Progesterone-mediated oocyte maturation];ko04114[Oocyte meiosis]	.
scaffold00001	1337343	.	G	T	SYNONYMOUS_CODING	LOW	B9J08_003248	C1_03030W_A	RPS16A	40S ribosomal protein S16	PF00380.14|Ribosomal_S9[Ribosomal protein S9/S16]	.	GO:0005840;GO:0006412;GO:0003735	.	.
scaffold00001	1466488	.	C	T	SYNONYMOUS_CODING	LOW	B9J08_003306	C3_06870W_A	TDH3	glyceraldehyde-3-phosphate dehydrogenase	PF02800.15|Gp_dh_C[Glyceraldehyde 3-phosphate dehydrogenase, C-terminal domain];TIGR01534[GAPDH-I: glyceraldehyde-3-phosphate dehydrogenase, type I];PF00044.19|Gp_dh_N[Glyceraldehyde 3-phosphate dehydrogenase, NAD binding domain]	EC:1.2.1.12[Glyceraldehyde-3-phosphate dehydrogenase (phosphorylating).]	GO:0001968;GO:0006096;GO:0055114;GO:0005737;GO:0044416;GO:0030446;GO:0005576;GO:0071555;GO:0005886;GO:0006006;GO:0043236;GO:0051287;GO:0050661;GO:0007160;GO:0009986;GO:0044406;GO:0030445;EC:1.2.1.12;GO:0004365	ko05010[Alzheimer's disease]	.
scaffold00001	1501907	.	G	A	SYNONYMOUS_CODING	LOW	B9J08_003323	C2_09990C_A	YOR1	hypothetical protein	PF00005.22|ABC_tran[ABC transporter];PF00664.18|ABC_membrane[ABC transporter transmembrane region]	.	EC:3.6.3.44;GO:0005524;GO:0016021;GO:0008559;GO:0042908;GO:0006855	.	TMH:10
scaffold00001	1515848	.	A	G	SYNONYMOUS_CODING	LOW	B9J08_003331	C2_01030W_A	.	ribosomal protein L16	TIGR01164[rplP_bact: ribosomal protein L16];PF00252.13|Ribosomal_L16[Ribosomal protein L16p/L10e]	.	GO:0005762;GO:0032543;GO:0051604;GO:0003735;GO:0019843	.	.
scaffold00001	1684538	.	T	C	SYNONYMOUS_CODING	LOW	B9J08_003414	C3_06830C_A	.	hypothetical protein	PF00271.26|Helicase_C[Helicase conserved C-terminal domain];PF05773.17|RWD[RWD domain];PF04408.18|HA2[Helicase associated domain (HA2)];PF00270.24|DEAD[DEAD/DEAH box helicase];PF07717.11|OB_NTP_bind[Oligonucleotide/oligosaccharide-binding (OB)-fold]	.	GO:0005524;GO:0005829;GO:0004386;GO:0005739;GO:0003676	.	.
scaffold00001	1832587	.	T	C	SYNONYMOUS_CODING	LOW	B9J08_003479	CR_01030W_A	DAL81	hypothetical protein	PF04082.13|Fungal_trans[Fungal specific transcription factor domain];PF00172.13|Zn_clus[Fungal Zn(2)-Cys(6) binuclear cluster domain]	.	GO:1901717;GO:0003677;GO:0000981;GO:0005634;GO:0001128;GO:0001080;GO:1901714;GO:0045944;GO:0019740;GO:0008270;GO:0001135;GO:0051123	.	.
scaffold00001	1900189	.	T	A	SYNONYMOUS_CODING	LOW	B9J08_003514	C4_00200C_A	MET15	protein MET17	PF00155.16|Aminotran_1_2[Aminotransferase class I and II];PF01041.12|DegT_DnrJ_EryC1[DegT/DnrJ/EryC1/StrS aminotransferase family];PF00266.14|Aminotran_5[Aminotransferase class-V];PF01053.15|Cys_Met_Meta_PP[Cys/Met metabolism PLP-dependent enzyme];PF02347.11|GDC-P[Glycine cleavage system P-protein]	.	GO:0003961;GO:0004124;GO:0071266;GO:0005737;GO:0030446;EC:2.5.1.49;EC:2.5.1.47;GO:0019344;GO:0030170	.	.
scaffold00001	1923137	.	A	G	SYNONYMOUS_CODING	LOW	B9J08_003525	C4_00690C_A	.	diphthamide biosynthesis protein 2	PF01866.12|Diphthamide_syn[Putative diphthamide synthesis protein];TIGR00272[DPH2: diphthamide biosynthesis protein 2]	.	GO:0017183;GO:0005829	.	.
scaffold00001	2055821	.	C	A	SYNONYMOUS_CODING	LOW	B9J08_003589	C2_10550C_A	GCN1	hypothetical protein	PF13513.1|HEAT_EZ[HEAT-like repeat];PF12074.3|DUF3554[Domain of unknown function (DUF3554)];PF12348.3|CLASP_N[CLASP N terminal];PF12717.2|Cnd1[non-SMC mitotic condensation complex subunit 1];PF13646.1|HEAT_2[HEAT repeats]	.	GO:0045859;GO:0043022;GO:0033554;GO:0019887;GO:0033674;GO:0006417;GO:0019901	.	.
scaffold00001	2159598	.	G	A	SYNONYMOUS_CODING	LOW	B9J08_003632	C2_05460W_A	CDC19	pyruvate kinase	PF02887.11|PK_C[Pyruvate kinase, alpha/beta domain];PF00224.16|PK[Pyruvate kinase, barrel domain];TIGR01064[pyruv_kin: pyruvate kinase]	EC:2.7.1.40[Pyruvate kinase.]	GO:0000287;GO:0036170;GO:0009267;GO:0005524;GO:0004743;GO:0044416;GO:0030955;GO:0030446;GO:0042866;GO:0005829;GO:0005886;GO:0061621;GO:0036180;GO:0016301;GO:0071216;GO:0009986;EC:2.7.1.40;GO:0030445	ko00230[Purine metabolism];ko00620[Pyruvate metabolism];ko04930[Type II diabetes mellitus];ko00710[Carbon fixation in photosynthetic organisms]	.
scaffold00001	2178186	.	T	C	SYNONYMOUS_CODING	LOW	B9J08_003640	C2_02430W_A	UTP21	hypothetical protein	PF04192.7|Utp21[Utp21 specific WD40 associated putative domain];PF00400.27|WD40[WD domain, G-beta repeat]	.	GO:0072686;GO:0034388;GO:0044732;GO:0032040;GO:0005829;GO:0006364;GO:0032153	.	.
scaffold00001	2212806	.	T	C	SYNONYMOUS_CODING	LOW	B9J08_003660	C6_03940C_A	PBP2	hypothetical protein	PF00013.24|KH_1[KH domain];PF13014.1|KH_3[KH domain]	.	GO:0003729;GO:0005634;GO:0005737	.	.
scaffold00001	2252269	.	C	T	SYNONYMOUS_CODING	LOW	B9J08_003683	C6_02020C_A	.	hypothetical protein	.	.	.	.	.
scaffold00001	2330224	.	G	A	SYNONYMOUS_CODING	LOW	B9J08_003720	C2_04500W_A	.	hypothetical protein	PF00271.26|Helicase_C[Helicase conserved C-terminal domain];PF00176.18|SNF2_N[SNF2 family N-terminal domain];PF12054.3|DUF3535[Domain of unknown function (DUF3535)]	EC:3.6.4.-[Acting on acid anhydrides; involved in cellular and subcellular movement.]	GO:0045892;GO:0045898;GO:0003677;GO:0005524;EC:3.6.1.3;GO:0004386;GO:0006364;GO:0000228;GO:0017025;GO:0042790;GO:0005739;GO:0016887	.	.
scaffold00001	2523443	.	G	A	SYNONYMOUS_CODING	LOW	B9J08_003802	C2_10090C_A	.	hypothetical protein	PF13041.1|PPR_2[PPR repeat family]	.	GO:0005739	.	.
scaffold00001	2625911	.	G	A	SYNONYMOUS_CODING	LOW	B9J08_003849	C2_01320W_A	.	hypothetical protein	PF01399.22|PCI[PCI domain]	.	GO:0043248;GO:0005634;GO:0006511;GO:0008541;GO:0005198;GO:0034515	.	.
scaffold00001	2643134	.	T	C	SYNONYMOUS_CODING	LOW	B9J08_003857	.	.	hypothetical protein	.	.	.	.	.
scaffold00001	2783579	.	A	C	SYNONYMOUS_CODING	LOW	B9J08_003920	C1_12410C_A	PKH2	hypothetical protein	PF00069.20|Pkinase[Protein kinase domain];PF07714.12|Pkinase_Tyr[Protein tyrosine kinase]	.	GO:0008289;GO:0005524;GO:0004672;GO:0006468	.	.
scaffold00001	2790612	.	C	T	SYNONYMOUS_CODING	LOW	B9J08_003922	C1_12430W_A	.	hypothetical protein	.	.	GO:0031932	.	.
scaffold00001	2878419	.	C	G	SYNONYMOUS_CODING	LOW	B9J08_003959	C3_02600C_A	SLC1	hypothetical protein	PF01553.16|Acyltransferase[Acyltransferase]	EC:2.3.1.51[1-acylglycerol-3-phosphate O-acyltransferase.]	EC:2.3.1.51;GO:0005783;GO:0005811;GO:0016021;GO:0003841;GO:0046474	ko00564[Glycerophospholipid metabolism];ko04975[Fat digestion and absorption]	TMH:1
scaffold00001	2900662	.	T	A	SYNONYMOUS_CODING	LOW	B9J08_003970	C5_05200C_A	.	hypothetical protein	.	.	GO:0005783;GO:0016021	.	TMH:2
scaffold00001	3187856	.	A	T	SYNONYMOUS_CODING	LOW	B9J08_004100	C5_00730W_A	HYR3	hypothetical protein	PF11765.3|Hyphal_reg_CWP[Hyphally regulated cell wall protein N-terminal]	.	.	.	TMH:1
scaffold00001	3187859	.	T	C	SYNONYMOUS_CODING	LOW	B9J08_004100	C5_00730W_A	HYR3	hypothetical protein	PF11765.3|Hyphal_reg_CWP[Hyphally regulated cell wall protein N-terminal]	.	.	.	TMH:1
scaffold00001	3187865	.	T	C	SYNONYMOUS_CODING	LOW	B9J08_004100	C5_00730W_A	HYR3	hypothetical protein	PF11765.3|Hyphal_reg_CWP[Hyphally regulated cell wall protein N-terminal]	.	.	.	TMH:1
scaffold00007	8441	.	C	T	SYNONYMOUS_CODING	LOW	B9J08_004105	.	.	hypothetical protein	.	.	.	.	.
scaffold00007	8471	.	C	G	SYNONYMOUS_CODING	LOW	B9J08_004105	.	.	hypothetical protein	.	.	.	.	.
scaffold00007	8507	.	G	A	SYNONYMOUS_CODING	LOW	B9J08_004105	.	.	hypothetical protein	.	.	.	.	.
scaffold00007	8522	.	C	T	SYNONYMOUS_CODING	LOW	B9J08_004105	.	.	hypothetical protein	.	.	.	.	.
scaffold00007	95423	.	G	A	SYNONYMOUS_CODING	LOW	B9J08_004133	C2_08010W_A	BLM3	hypothetical protein	PF11919.3|DUF3437[Domain of unknown function (DUF3437)]	.	GO:0043248;GO:0005634;GO:0006281;GO:0010499;GO:0043486;GO:0070577;GO:0061136;GO:0034515;GO:0005839;GO:1990237;GO:0016504;GO:0070628;GO:0010952;GO:1990236	.	.
scaffold00007	118574	.	T	A	SYNONYMOUS_CODING	LOW	B9J08_004137	C1_12970C_A	SEC2	hypothetical protein	PF06428.6|Sec2p[GDP/GTP exchange factor Sec2p]	.	GO:0051286;GO:0005934;GO:0043547;GO:0005085;GO:0032153;GO:0005935;GO:0005829;GO:0030133;GO:0070273;GO:0006914;GO:0006887	.	.
scaffold00007	119650	.	G	T	SYNONYMOUS_CODING	LOW	B9J08_004138	C1_12960C_A	BNI1	hypothetical protein	PF06371.8|Drf_GBD[Diaphanous GTPase-binding Domain];PF06367.11|Drf_FH3[Diaphanous FH3 Domain];PF02181.18|FH2[Formin Homology 2 Domain]	.	GO:0000132;GO:0017048;GO:0000133;GO:0043332;GO:0070649;GO:0007118;GO:0000131;GO:2000251;GO:0071519;GO:0042802;GO:0005934;GO:0051016;GO:0005935;GO:0045010;GO:0003779;GO:0005884;GO:0005522;GO:0032880	.	.
scaffold00007	185877	.	A	C	SYNONYMOUS_CODING	LOW	B9J08_004161	C6_03600C_A	.	hypothetical protein	PF00067.17|p450[Cytochrome P450]	.	GO:0016020;GO:0020037;EC:1.14.14;GO:0005506;GO:0055114;GO:0016712	.	.
scaffold00007	267809	.	A	T	SYNONYMOUS_CODING	LOW	B9J08_004193	.	.	hypothetical protein	.	.	.	.	.
scaffold00007	282675	.	G	A	SYNONYMOUS_CODING	LOW	B9J08_004201	C4_05790W_A	.	hypothetical protein	PF12584.3|TRAPPC10[Trafficking protein particle complex subunit 10, TRAPPC10]	.	GO:0032258;GO:0005829;GO:0034498;GO:0006891;GO:1990071;GO:0005802;GO:0005769;GO:0016236	.	.
scaffold00007	292935	.	G	A	SYNONYMOUS_CODING	LOW	B9J08_004205	C4_04140W_A	.	hypothetical protein	PF03372.18|Exo_endo_phos[Endonuclease/Exonuclease/phosphatase family]	.	.	.	TMH:1
scaffold00007	323045	.	C	A	SYNONYMOUS_CODING	LOW	B9J08_004222	C1_10670C_A	RPA190	hypothetical protein	PF04997.7|RNA_pol_Rpb1_1[RNA polymerase Rpb1, domain 1];PF04983.13|RNA_pol_Rpb1_3[RNA polymerase Rpb1, domain 3];PF00623.15|RNA_pol_Rpb1_2[RNA polymerase Rpb1, domain 2];PF05000.12|RNA_pol_Rpb1_4[RNA polymerase Rpb1, domain 4];PF04998.12|RNA_pol_Rpb1_5[RNA polymerase Rpb1, domain 5]	EC:2.7.7.6[DNA-directed RNA polymerase.]	GO:0006406;GO:0003677;GO:0005829;GO:0042790;GO:0008270;GO:0001054;GO:0005736	ko00240[Pyrimidine metabolism];ko03020[RNA polymerase]	.
scaffold00007	420820	.	G	A	SYNONYMOUS_CODING	LOW	B9J08_004263	C5_00450C_A	IFG3	hypothetical protein	PF01266.19|DAO[FAD dependent oxidoreductase]	.	GO:0008152	.	.
scaffold00007	518804	.	T	C	SYNONYMOUS_CODING	LOW	B9J08_004306	C5_04780W_A	ASH2	hypothetical protein	PF00622.23|SPRY[SPRY domain]	.	GO:0000781;GO:0042800;GO:0048189;GO:0006348;GO:0048188;GO:0006357;GO:0080182;GO:0000723	.	.
scaffold00007	654298	.	A	G	SYNONYMOUS_CODING	LOW	B9J08_004368	C2_03340W_A	.	hypothetical protein	PF08737.5|Rgp1[Rgp1]	.	.	.	.
scaffold00007	751288	.	G	A	SYNONYMOUS_CODING	LOW	B9J08_004407	C4_00560C_A	MMM1	hypothetical protein	PF10296.4|DUF2404[Putative integral membrane protein conserved region (DUF2404)]	.	GO:1990456;GO:0045040;GO:0032865;GO:0070096;GO:0015914;GO:0030176;GO:0000002	.	TMH:1
scaffold00007	753373	.	T	C	SYNONYMOUS_CODING	LOW	B9J08_004408	C4_00570C_A	PCT1	hypothetical protein	PF01467.21|CTP_transf_2[Cytidylyltransferase]	EC:2.7.7.15[Choline-phosphate cytidylyltransferase.]	EC:2.7.7.15;GO:0006657;GO:0004105;GO:0005635	ko00564[Glycerophospholipid metabolism]	.
scaffold00007	758697	.	C	T	SYNONYMOUS_CODING	LOW	B9J08_004411	C4_00590C_B	.	hypothetical protein	PF01417.15|ENTH[ENTH domain];PF07651.11|ANTH[ANTH domain]	.	GO:0030276;GO:0048268;GO:0005545;GO:0030136	.	.
scaffold00007	811805	.	A	C	SYNONYMOUS_CODING	LOW	B9J08_004437	C3_05280C_A	.	hypothetical protein	PF01151.13|ELO[GNS1/SUR4 family]	.	GO:0016020;GO:0006631	.	TMH:5
scaffold00007	861418	.	G	A	SYNONYMOUS_CODING	LOW	B9J08_004454	C4_01460C_A	.	hypothetical protein	PF13462.1|Thioredoxin_4[Thioredoxin]	.	.	.	.
scaffold00006	63533	.	G	T	SYNONYMOUS_CODING	LOW	B9J08_004492	C1_04960C_A	.	hypothetical protein	PF00646.28|F-box[F-box domain];PF12937.2|F-box-like[F-box-like]	.	GO:0005634;GO:0031146;GO:0071406;GO:0006974;GO:0005737;GO:0019005	.	.
scaffold00006	90189	.	C	T	SYNONYMOUS_CODING	LOW	B9J08_004504	CR_09370W_A	ELF1	hypothetical protein	PF00385.19|Chromo[Chromo (CHRromatin Organisation MOdifier) domain];PF00005.22|ABC_tran[ABC transporter];PF13304.1|AAA_21[AAA domain]	.	GO:0005634;GO:0005524;GO:0003746;EC:3.6.1.3;GO:0006414;GO:0016973;GO:0005829;GO:0005886;GO:0016887	.	.
scaffold00006	98898	.	T	C	SYNONYMOUS_CODING	LOW	B9J08_004508	CR_09340W_A	.	ubiquitin-conjugating enzyme E2 7	PF00179.21|UQ_con[Ubiquitin-conjugating enzyme]	EC:6.3.2.19[Ubiquitin--protein ligase.]	GO:0006333;GO:0005524;GO:0031505;GO:0030433;GO:0016567;GO:0000839;GO:0016874;GO:0004842;GO:0000837	ko04141[Protein processing in endoplasmic reticulum];ko05012[Parkinson's disease]	.
scaffold00006	278888	.	C	T	SYNONYMOUS_CODING	LOW	B9J08_004579	C1_08380W_A	TEF2	elongation factor 1-alpha 2	TIGR00483[EF-1_alpha: translation elongation factor EF-1, subunit alpha];PF03143.12|GTP_EFTU_D3[Elongation factor Tu C-terminal domain];PF00009.22|GTP_EFTU[Elongation factor Tu GTP binding domain];PF03144.20|GTP_EFTU_D2[Elongation factor Tu domain 2]	.	GO:0003746;GO:0006414;GO:0005737;GO:0003924;GO:0030446;GO:0009986;GO:0030445;GO:0005515;GO:0051701;GO:0005525	.	.
scaffold00006	296047	.	T	C	SYNONYMOUS_CODING	LOW	B9J08_004585	C2_08630C_A	.	hypothetical protein	PF03985.8|Paf1[Paf1]	.	GO:2001255;GO:0090262;GO:0031124;GO:0016570;GO:0006368;GO:0000122;GO:0006362;GO:0032968;GO:0000083;GO:0005829;GO:0003682;GO:0000183;GO:0001015;GO:0006353;GO:0034401;GO:0051569;GO:1990269;GO:0016593;GO:0035327;GO:2001173;GO:0070911;GO:0000983;GO:0006364;GO:0045910;GO:0031938;GO:0031126;GO:2001209;GO:2001165;GO:0001089	.	.
scaffold00006	474487	.	G	T	SYNONYMOUS_CODING	LOW	B9J08_004663	C1_01770W_A	MAK32	hypothetical protein	PF00294.19|PfkB[pfkB family carbohydrate kinase];PF08543.7|Phos_pyr_kin[Phosphomethylpyrimidine kinase]	.	GO:0044419	.	.
scaffold00006	484508	.	T	C	SYNONYMOUS_CODING	LOW	B9J08_004670	C1_03630W_A	.	hypothetical protein	.	.	GO:0006338;GO:0070209	.	.
scaffold00006	660031	.	T	C	SYNONYMOUS_CODING	LOW	B9J08_004757	C3_07110W_A	.	hypothetical protein	PF12799.2|LRR_4[Leucine Rich repeats (2 copies)];PF13855.1|LRR_8[Leucine rich repeat]	.	GO:0010458;GO:0005816;GO:0005200;GO:0000073;GO:0051293;GO:0045132	.	.
scaffold00006	662332	.	G	A	SYNONYMOUS_CODING	LOW	B9J08_004757	C3_07110W_A	.	hypothetical protein	PF12799.2|LRR_4[Leucine Rich repeats (2 copies)];PF13855.1|LRR_8[Leucine rich repeat]	.	GO:0010458;GO:0005816;GO:0005200;GO:0000073;GO:0051293;GO:0045132	.	.
scaffold00006	776208	.	C	T	SYNONYMOUS_CODING	LOW	B9J08_004802	C6_02900C_A	.	hypothetical protein	PF03099.14|BPL_LplA_LipB[Biotin/lipoate A/B protein ligase family]	EC:2.7.7.63[Lipoate--protein ligase.]	GO:0005739;GO:0009249	.	.
scaffold00006	809429	.	A	T	SYNONYMOUS_CODING	LOW	B9J08_004818	C5_01870W_B	.	hypothetical protein	PF07719.12|TPR_2[Tetratricopeptide repeat];PF12569.3|NARP1[NMDA receptor-regulated protein 1]	EC:2.3.1.88[Peptide alpha-N-acetyltransferase.]	GO:0031415;GO:0004596;GO:0006474;EC:2.3.1.88;GO:0005739;GO:0022626	.	.
scaffold00006	975116	.	T	G	SYNONYMOUS_CODING	LOW	B9J08_004890	C6_02660C_A	.	hypothetical protein	PF01425.16|Amidase[Amidase]	EC:3.5.1.4[Amidase.]	GO:0005829;GO:0016884	ko00643[Styrene degradation];ko00380[Tryptophan metabolism];ko00360[Phenylalanine metabolism];ko00627[Aminobenzoate degradation];ko00460[Cyanoamino acid metabolism]	.
scaffold00002	163662	.	T	C	SYNONYMOUS_CODING	LOW	B9J08_004967	C2_02990C_A	HYU1	hypothetical protein	PF05378.8|Hydant_A_N[Hydantoinase/oxoprolinase N-terminal region];PF01968.13|Hydantoinase_A[Hydantoinase/oxoprolinase];PF02538.9|Hydantoinase_B[Hydantoinase B/oxoprolinase]	EC:3.5.2.9[5-oxoprolinase (ATP-hydrolyzing).]	EC:3.5.2.9;GO:0017168	.	.
scaffold00002	294084	.	T	A	SYNONYMOUS_CODING	LOW	B9J08_005032	C2_03070C_A	SMP3	hypothetical protein	PF03901.12|Glyco_transf_22[Alg9-like mannosyltransferase family]	EC:2.4.1.-[Hexosyltransferases.]	GO:0097502;GO:0006506;GO:0005783;EC:2.4.1.130;GO:0006276;GO:0004584;GO:0016021	.	TMH:5
scaffold00002	330158	.	C	A	SYNONYMOUS_CODING	LOW	B9J08_005048	C5_00840W_A	.	hypothetical protein	PF00400.27|WD40[WD domain, G-beta repeat];PF08662.6|eIF2A[Eukaryotic translation initiation factor eIF2A]	.	GO:0000346	ko03040[Spliceosome]	.
scaffold00002	362071	.	A	G	SYNONYMOUS_CODING	LOW	B9J08_005062	C7_02920W_A	.	hypothetical protein	PF01425.16|Amidase[Amidase]	.	GO:0016884;EC:3.5.1.4;GO:0004040	.	.
scaffold00002	479216	.	G	A	SYNONYMOUS_CODING	LOW	B9J08_005115	CR_05620C_A	MTG2	obg family GTPase CgtA	PF01926.18|MMR_HSR1[50S ribosome-binding GTPase];PF02421.13|FeoB_N[Ferrous iron transport protein B];PF01018.17|GTP1_OBG[GTP1/OBG]	.	GO:0043022;GO:0000287;GO:0019898;GO:0002181;GO:0005743;GO:0005525;GO:0003924	.	.
scaffold00002	572497	.	T	A	SYNONYMOUS_CODING	LOW	B9J08_005166	CR_09860W_A	YTA6	hypothetical protein	PF00004.24|AAA[ATPase family associated with various cellular activities (AAA)];PF05496.7|RuvB_N[Holliday junction DNA helicase ruvB N-terminus];PF09336.5|Vps4_C[Vps4 C terminal oligomerisation domain]	.	GO:0005524	.	.
scaffold00002	592124	.	A	G	SYNONYMOUS_CODING	LOW	B9J08_005174	C2_07820C_A	PHO86	hypothetical protein	PF11124.3|Pho86[Inorganic phosphate transporter Pho86]	.	GO:0006457;GO:0010966;GO:0005783;GO:0051082;GO:0016021;GO:0006888	.	TMH:2
scaffold00002	728997	.	T	A	SYNONYMOUS_CODING	LOW	B9J08_005233	C4_01650C_A	.	hypothetical protein	PF08783.6|DWNN[DWNN domain]	.	GO:0036002;GO:0005847;GO:0005829;GO:0016567;GO:0008270;GO:0006379;GO:0006378	.	.
scaffold00002	807889	.	C	T	SYNONYMOUS_CODING	LOW	B9J08_005269	C6_02860W_A	STE23	hypothetical protein	PF05193.16|Peptidase_M16_C[Peptidase M16 inactive domain];PF00675.15|Peptidase_M16[Insulinase (Peptidase family M16)]	EC:3.4.24.56[Insulysin.]	GO:0046872;GO:0007323;GO:0019898;GO:0003824	.	.
scaffold00002	827986	.	T	A	SYNONYMOUS_CODING	LOW	B9J08_005277	.	.	hypothetical protein	.	.	.	.	.
scaffold00002	1201227	.	G	A	SYNONYMOUS_CODING	LOW	B9J08_005434	C1_07660W_A	.	hypothetical protein	PF11707.3|Npa1[Ribosome 60S biogenesis N-terminal]	.	GO:0005730;GO:0000466;GO:0005829;GO:0000463	.	.
scaffold00002	1237151	.	C	A	SYNONYMOUS_CODING	LOW	B9J08_005453	C1_13900C_A	LCB2	hypothetical protein	PF00155.16|Aminotran_1_2[Aminotransferase class I and II];PF01212.16|Beta_elim_lyase[Beta-eliminating lyase]	EC:2.3.1.50[Serine C-palmitoyltransferase.]	EC:2.3.1.50;GO:0009058;GO:0004758;GO:0016021;GO:0030170	.	.
scaffold00002	1238227	.	A	G	SYNONYMOUS_CODING	LOW	B9J08_005454	C1_13990W_A	OCA6	hypothetical protein	PF03162.8|Y_phosphatase2[Tyrosine phosphatase family]	.	.	.	.
scaffold00002	1243938	.	T	C	SYNONYMOUS_CODING	LOW	B9J08_005457	C7_01230C_A	.	hypothetical protein	PF01933.13|UPF0052[Uncharacterised protein family UPF0052]	.	GO:0016020	.	.
scaffold00002	1272133	.	G	A	SYNONYMOUS_CODING	LOW	B9J08_005476	CR_03830C_A	MCM2	hypothetical protein	PF01078.16|Mg_chelatase[Magnesium chelatase, subunit ChlI];PF00493.18|MCM[MCM2/3/5 family];PF07728.9|AAA_5[AAA domain (dynein-related subfamily)];PF12619.3|MCM2_N[Mini-chromosome maintenance protein 2];PF14551.1|MCM_N[MCM N-terminal domain]	.	GO:0003688;GO:0000784;GO:0005524;GO:1902450;GO:0032508;GO:0005737;GO:0003697;GO:0031298;GO:0003682;GO:0005656;GO:0042555;GO:0000727;GO:0006270;GO:0000790;GO:0006271;GO:0031261;GO:0006267;GO:0003678	ko04113[Meiosis - yeast];ko04111[Cell cycle - yeast];ko04110[Cell cycle]	.
scaffold00012	21102	.	T	A	SYNONYMOUS_CODING	LOW	B9J08_005574	.	.	hypothetical protein	.	.	.	.	.
scaffold00001	2767842	.	A	G	UPSTREAM	MODIFIER	B9J08_003911	C3_03870C_A	SAP9	hypothetical protein	PF00026.18|Asp[Eukaryotic aspartyl protease]	.	GO:0003824	.	.
scaffold00007	820545	.	C	T	UPSTREAM	MODIFIER	B9J08_004438	C3_05290C_A	.	hypothetical protein	PF00013.24|KH_1[KH domain];PF13014.1|KH_3[KH domain]	.	GO:0005840;GO:0003723	.	.
scaffold00004	963653	.	T	A	UPSTREAM	MODIFIER	B9J08_000450	C5_03940C_B	.	hypothetical protein	PF07690.11|MFS_1[Major Facilitator Superfamily]	.	GO:0055085;GO:0016021	.	TMH:8
scaffold00005	1041089	.	A	G	UPSTREAM	MODIFIER	B9J08_001527	C2_01000W_A	HGT7	hypothetical protein	PF07690.11|MFS_1[Major Facilitator Superfamily];PF00083.19|Sugar_tr[Sugar (and other) transporter]	.	GO:0055085;GO:0016021;GO:0022857	.	TMH:11
scaffold00006	770747	.	A	T	UPSTREAM	MODIFIER	B9J08_004797	C2_01000W_A	HGT7	hypothetical protein	PF07690.11|MFS_1[Major Facilitator Superfamily];PF00083.19|Sugar_tr[Sugar (and other) transporter]	.	GO:0055085;GO:0008643;GO:0016021;GO:0022857	.	TMH:12
scaffold00006	770770	.	A	G	UPSTREAM	MODIFIER	B9J08_004797	C2_01000W_A	HGT7	hypothetical protein	PF07690.11|MFS_1[Major Facilitator Superfamily];PF00083.19|Sugar_tr[Sugar (and other) transporter]	.	GO:0055085;GO:0008643;GO:0016021;GO:0022857	.	TMH:12
scaffold00006	770874	.	T	G	UPSTREAM	MODIFIER	B9J08_004797	C2_01000W_A	HGT7	hypothetical protein	PF07690.11|MFS_1[Major Facilitator Superfamily];PF00083.19|Sugar_tr[Sugar (and other) transporter]	.	GO:0055085;GO:0008643;GO:0016021;GO:0022857	.	TMH:12
scaffold00006	771197	.	T	C	UPSTREAM	MODIFIER	B9J08_004797	C2_01000W_A	HGT7	hypothetical protein	PF07690.11|MFS_1[Major Facilitator Superfamily];PF00083.19|Sugar_tr[Sugar (and other) transporter]	.	GO:0055085;GO:0008643;GO:0016021;GO:0022857	.	TMH:12
scaffold00006	771215	.	G	A	UPSTREAM	MODIFIER	B9J08_004797	C2_01000W_A	HGT7	hypothetical protein	PF07690.11|MFS_1[Major Facilitator Superfamily];PF00083.19|Sugar_tr[Sugar (and other) transporter]	.	GO:0055085;GO:0008643;GO:0016021;GO:0022857	.	TMH:12
scaffold00006	771229	.	C	G	UPSTREAM	MODIFIER	B9J08_004797	C2_01000W_A	HGT7	hypothetical protein	PF07690.11|MFS_1[Major Facilitator Superfamily];PF00083.19|Sugar_tr[Sugar (and other) transporter]	.	GO:0055085;GO:0008643;GO:0016021;GO:0022857	.	TMH:12
scaffold00006	771240	.	A	G	UPSTREAM	MODIFIER	B9J08_004797	C2_01000W_A	HGT7	hypothetical protein	PF07690.11|MFS_1[Major Facilitator Superfamily];PF00083.19|Sugar_tr[Sugar (and other) transporter]	.	GO:0055085;GO:0008643;GO:0016021;GO:0022857	.	TMH:12
scaffold00006	771242	.	C	A	UPSTREAM	MODIFIER	B9J08_004797	C2_01000W_A	HGT7	hypothetical protein	PF07690.11|MFS_1[Major Facilitator Superfamily];PF00083.19|Sugar_tr[Sugar (and other) transporter]	.	GO:0055085;GO:0008643;GO:0016021;GO:0022857	.	TMH:12
scaffold00006	771243	.	C	T	UPSTREAM	MODIFIER	B9J08_004797	C2_01000W_A	HGT7	hypothetical protein	PF07690.11|MFS_1[Major Facilitator Superfamily];PF00083.19|Sugar_tr[Sugar (and other) transporter]	.	GO:0055085;GO:0008643;GO:0016021;GO:0022857	.	TMH:12
scaffold00006	771279	.	G	GA	UPSTREAM	MODIFIER	B9J08_004797	C2_01000W_A	HGT7	hypothetical protein	PF07690.11|MFS_1[Major Facilitator Superfamily];PF00083.19|Sugar_tr[Sugar (and other) transporter]	.	GO:0055085;GO:0008643;GO:0016021;GO:0022857	.	TMH:12
scaffold00004	744321	.	C	T	UPSTREAM	MODIFIER	B9J08_000367	CR_02370W_A	ERG25	methylsterol monooxygenase	PF04116.8|FA_hydroxylase[Fatty acid hydroxylase superfamily]	EC:1.14.13.72[Methylsterol monooxygenase.]	EC:1.14.13.72;GO:0000254;GO:0005506;GO:0006696;GO:0055114;GO:0016021;GO:0005789;GO:0006633	.	.
scaffold00007	64109	.	G	A	UPSTREAM	MODIFIER	B9J08_004116	CR_10660W_A	CKA1	hypothetical protein	PF00069.20|Pkinase[Protein kinase domain];PF07714.12|Pkinase_Tyr[Protein tyrosine kinase]	EC:2.7.11.1[Non-specific serine/threonine protein kinase.]	GO:0006359;GO:0005524;GO:0006468;GO:0005956;GO:0006356;GO:0007535;GO:0004674;EC:2.7.11;GO:0006974;GO:0034456	ko04310[Wnt signaling pathway];ko04712[Circadian rhythm - plant];ko04530[Tight junction];ko05162[Measles];ko04520[Adherens junction]	.
scaffold00003	982201	.	T	C	UPSTREAM	MODIFIER	B9J08_000948	C1_02260C_A	AGE3	hypothetical protein	PF01412.13|ArfGap[Putative GTPase activating protein for Arf]	.	GO:0005856;GO:0030037;GO:0043547;GO:0006890;GO:0005793;GO:0005802;GO:0005768;GO:0003779;GO:0043001;GO:0006888;GO:0005096	.	.
scaffold00009	492988	.	A	C	UPSTREAM	MODIFIER	B9J08_002454	C2_04240C_A	HYM1	hypothetical protein	PF08569.6|Mo25[Mo25-like]	.	GO:0036180;GO:0036244;GO:0036170;GO:0035690;GO:0009267;GO:0006355;GO:0031505;GO:0043332;GO:0008360;GO:0036178;GO:0007118;GO:0000920;GO:0007163;GO:0000131;GO:0005933	.	.
scaffold00001	2272939	.	T	C	UPSTREAM	MODIFIER	B9J08_003692	CR_09770C_A	PMT5	hypothetical protein	PF02815.14|MIR[MIR domain];PF02366.13|PMT[Dolichyl-phosphate-mannose-protein mannosyltransferase]	EC:2.4.1.109[Dolichyl-phosphate-mannose-protein mannosyltransferase.]	GO:0035269;GO:0016021;EC:2.4.1.109;GO:0005886;GO:0004169	.	TMH:10
scaffold00004	679568	.	GA	G	UPSTREAM	MODIFIER	B9J08_000333	C1_11130W_A	FGR16	hypothetical protein	PF03371.10|PRP38[PRP38 family]	.	GO:0036180;GO:0005634;GO:0036170;GO:0009267;GO:0005829	.	.
scaffold00007	657542	.	T	G	UPSTREAM	MODIFIER	B9J08_004367	C5_04470C_A	.	hypothetical protein	.	.	.	.	.
scaffold00001	852884	.	A	G	UPSTREAM	MODIFIER	B9J08_002994	CR_00510C_A	ADE1	phosphoribosylaminoimidazole-succinocarboxamide synthase	PF01259.13|SAICAR_synt[SAICAR synthetase];TIGR00081[purC: phosphoribosylaminoimidazolesuccinocarboxamide synthase]	EC:6.3.2.6[Phosphoribosylaminoimidazolesuccinocarboxamide synthase.]	EC:6.3.2.6;GO:0005524;GO:0004639;GO:0006164	.	.
scaffold00001	2863462	.	ATT	A	UPSTREAM	MODIFIER	B9J08_003951	C3_04520C_A	ADE2	phosphoribosylaminoimidazole carboxylase	TIGR01162[purE: phosphoribosylaminoimidazole carboxylase, catalytic subunit];PF02786.12|CPSase_L_D2[Carbamoyl-phosphate synthase L chain, ATP binding domain];PF00731.15|AIRC[AIR carboxylase];TIGR01161[purK: phosphoribosylaminoimidazole carboxylase, ATPase subunit];PF13535.1|ATP-grasp_4[ATP-grasp domain];PF02222.17|ATP-grasp[ATP-grasp domain]	EC:4.1.1.21[Phosphoribosylaminoimidazole carboxylase.]	GO:0005524;GO:0006189;GO:0005737;GO:0046872;GO:0046084;GO:0009405;EC:4.1.1.21;GO:0004638	.	.
scaffold00006	568492	.	G	A	UPSTREAM	MODIFIER	B9J08_004709	C4_03180W_A	NCP1	hypothetical protein	PF00175.16|NAD_binding_1[Oxidoreductase NAD-binding domain];PF00667.15|FAD_binding_1[FAD binding domain];PF00258.20|Flavodoxin_1[Flavodoxin]	EC:1.6.2.4[NADPH--hemoprotein reductase.]	GO:0006694;GO:0003958;GO:0035690;GO:0010181;GO:0005789;GO:0005739;GO:0055114;EC:1.6.2.4	.	.
scaffold00002	902488	.	T	C	UPSTREAM	MODIFIER	B9J08_005313	C5_01240W_A	AUR1	hypothetical protein	PF01569.16|PAP2[PAP2 superfamily];PF14378.1|PAP2_3[PAP2 superfamily]	.	GO:0035690;GO:0006673;GO:0030148;GO:0016021;GO:0045140;GO:0070916	.	TMH:7
scaffold00003	403458	.	C	T	UPSTREAM	MODIFIER	B9J08_000693	CR_00520C_A	CRM1	hypothetical protein	PF03810.14|IBN_N[Importin-beta N-terminal domain];PF08389.7|Xpo1[Exportin 1-like protein];PF08767.6|CRM1_C[CRM1 C terminal]	.	GO:0006406;GO:0005634;GO:0008565;GO:0005816;GO:0000055;GO:0034501;GO:0008536;GO:0005049;GO:0006611;GO:0000776	ko03013[RNA transport]	.
scaffold00010	357697	.	TCAC	T	UPSTREAM	MODIFIER	B9J08_002109	C1_03680W_B	ENG1	hypothetical protein	PF03639.8|Glyco_hydro_81[Glycosyl hydrolase family 81]	.	GO:0042973;GO:0009277;GO:0009986;EC:3.2.1.6;GO:0052861;GO:0030428;EC:3.2.1.39	.	.
scaffold00007	152806	.	A	AT	UPSTREAM	MODIFIER	B9J08_004148	C1_13080W_A	OP4	hypothetical protein	.	.	GO:0009986;GO:0005576	.	.
scaffold00006	737571	.	G	GAATGGCTGCAA	UPSTREAM	MODIFIER	B9J08_004786	C2_08870C_A	PIR1	hypothetical protein	PF00399.14|PIR[Yeast PIR protein repeat]	.	GO:0005199;GO:0005618	.	.
scaffold00004	3296	.	T	G	UPSTREAM	MODIFIER	B9J08_000001	.	.	hypothetical protein	.	.	.	.	.
scaffold00004	42564	.	T	C	UPSTREAM	MODIFIER	B9J08_000016	C1_04760C_A	SYG1	hypothetical protein	PF03105.14|SPX[SPX domain];PF03124.9|EXS[EXS family]	.	GO:0005783;GO:0007165;GO:0005794;GO:0016021;GO:0005886	.	TMH:8
scaffold00004	97291	.	T	G	UPSTREAM	MODIFIER	B9J08_000040	.	.	hypothetical protein	.	.	.	.	.
scaffold00004	158840	.	G	A	UPSTREAM	MODIFIER	B9J08_000071	C2_06730W_A	LSP1	sphingolipid long chain base-responsive protein PIL1	PF13805.1|Pil1[Eisosome component PIL1]	.	GO:0032126;GO:0070941	.	.
scaffold00004	177845	.	A	AGACGCCCAATAGGTCGGGCAGAAGGCGTCTCTGGCGT	UPSTREAM	MODIFIER	B9J08_000081	C2_06320W_A	.	hypothetical protein	PF14259.1|RRM_6[RNA recognition motif (a.k.a. RRM, RBD, or RNP domain)];PF00076.17|RRM_1[RNA recognition motif. (a.k.a. RRM, RBD, or RNP domain)]	.	GO:0010494;GO:0000166;GO:0003676	.	.
scaffold00004	264158	.	AT	A	UPSTREAM	MODIFIER	B9J08_000119	.	.	hypothetical protein	.	.	.	.	.
scaffold00004	298399	.	C	G	UPSTREAM	MODIFIER	B9J08_000137	C2_00220C_A	.	hypothetical protein	PF02270.10|TFIIF_beta[Transcription initiation factor IIF, beta subunit]	EC:3.6.4.12[DNA helicase.]	GO:0000991;GO:0044732;GO:0005674;GO:0003824;GO:0006368;GO:0006413;GO:0003743;GO:0006357;GO:0001174	.	.
scaffold00004	301484	.	G	A	UPSTREAM	MODIFIER	B9J08_000140	C2_01590W_A	COX13	hypothetical protein	PF02046.10|COX6A[Cytochrome c oxidase subunit VIa]	.	GO:0004129;GO:0030234;GO:0097250;GO:0050790;GO:0009060;EC:1.9.3.1;GO:1902600;GO:0005886;GO:0005751	ko05016[Huntington's disease];ko04260[Cardiac muscle contraction];ko05010[Alzheimer's disease];ko05012[Parkinson's disease]	.
scaffold00004	374329	.	CCCTTTG	C	UPSTREAM	MODIFIER	B9J08_000173	C2_04950C_A	CYT1	cytochrome c1%2C heme protein%2C mitochondrial	PF02167.10|Cytochrom_C1[Cytochrome C1 family]	.	EC:1.10.2.2;GO:0020037;GO:0008121;GO:0005750;GO:1902600;GO:0016021;GO:0045153;GO:0006122	ko05016[Huntington's disease];ko04260[Cardiac muscle contraction];ko05010[Alzheimer's disease];ko05012[Parkinson's disease]	TMH:1
scaffold00004	387020	.	A	AGAT	UPSTREAM	MODIFIER	B9J08_000180	C3_01450C_A	MET18	hypothetical protein	PF14500.1|MMS19_N[Dos2-interacting transcription regulator of RNA-Pol-II];PF12460.3|MMS19_C[RNAPII transcription regulator C-terminal]	.	GO:0006357;GO:0005634;GO:0005829;GO:0006366	.	.
scaffold00004	399173	.	C	T	UPSTREAM	MODIFIER	B9J08_000183	C3_01510W_A	.	hypothetical protein	PF09949.4|DUF2183[Uncharacterized conserved protein (DUF2183)]	.	EC:3.1.3.4;GO:0030479;GO:0044255;GO:0030036;GO:0005794;GO:0016311;GO:0008195	.	.
scaffold00004	470308	.	T	TA	UPSTREAM	MODIFIER	B9J08_000214	C4_03030C_A	NAN1	hypothetical protein	.	.	.	.	.
scaffold00004	471203	.	C	CT	UPSTREAM	MODIFIER	B9J08_000216	C4_03050C_A	.	hypothetical protein	PF01546.23|Peptidase_M20[Peptidase family M20/M25/M40];PF07687.9|M20_dimer[Peptidase dimerisation domain]	EC:3.4.17.4[Gly-Xaa carboxypeptidase.]	GO:0006508;GO:0004181;GO:0016021;EC:3.4.17	.	TMH:1
scaffold00004	577295	.	AGCCGAGCTGGAAGCGGCAGAGGACGAG	A	UPSTREAM	MODIFIER	B9J08_000277	.	.	hypothetical protein	PF00646.28|F-box[F-box domain];PF12937.2|F-box-like[F-box-like]	.	.	.	.
scaffold00004	605735	.	A	C	UPSTREAM	MODIFIER	B9J08_000292	.	.	hypothetical protein	.	.	.	.	.
scaffold00004	609998	.	A	T	UPSTREAM	MODIFIER	B9J08_000294	C1_08510W_A	EAF6	hypothetical protein	PF09340.5|NuA4[Histone acetyltransferase subunit NuA4]	.	GO:0035267;GO:0043967;GO:0005829;GO:0010485	.	.
scaffold00004	677741	.	G	A	UPSTREAM	MODIFIER	B9J08_000332	C4_03800C_A	NUP84	hypothetical protein	PF04121.8|Nup84_Nup100[Nuclear pore protein 84 / 107]	.	GO:0035392;GO:0031081;GO:0016020;GO:0034398;GO:0030466;GO:0000781;GO:0006999;GO:0031990;GO:0006302;GO:0045944;GO:0031080;GO:0000973;GO:0006606;GO:0017056;GO:0006998	.	.
scaffold00004	690598	.	T	TTCA	UPSTREAM	MODIFIER	B9J08_000339	C1_09030C_A	COX5	hypothetical protein	PF02936.9|COX4[Cytochrome c oxidase subunit IV]	.	GO:1902600;GO:0004129;GO:0016021;GO:0005739;GO:0009060;GO:0005886;EC:1.9.3.1	ko05016[Huntington's disease];ko04260[Cardiac muscle contraction];ko05010[Alzheimer's disease];ko05012[Parkinson's disease]	TMH:1
scaffold00004	730917	.	T	A	UPSTREAM	MODIFIER	B9J08_000360	CR_03140C_A	SYN8	hypothetical protein	PF05739.14|SNARE[SNARE domain]	.	GO:0006810;GO:0005484;GO:0005768;GO:0061025;GO:0016021	.	TMH:1
scaffold00004	790238	.	T	C	UPSTREAM	MODIFIER	B9J08_000385	C1_00230C_A	BFA1	hypothetical protein	.	.	.	.	.
scaffold00004	882823	.	G	A	UPSTREAM	MODIFIER	B9J08_000425	C5_01140C_A	.	hypothetical protein	PF01535.15|PPR[PPR repeat];PF13812.1|PPR_3[Pentatricopeptide repeat domain]	.	.	.	.
scaffold00004	894714	.	G	A	UPSTREAM	MODIFIER	B9J08_000431	C5_01210W_A	VPS1	vacuolar protein sorting-associated protein 1	PF01031.15|Dynamin_M[Dynamin central region];PF00350.18|Dynamin_N[Dynamin family];PF02212.13|GED[Dynamin GTPase effector domain]	.	GO:0000329;GO:0030036;GO:0005770;GO:0005777;GO:0005741;GO:0003924;GO:0045053;GO:0030479;GO:0006623;GO:0005794;GO:0060988;GO:0006897;GO:0005525;GO:0016559	.	.
scaffold00004	917837	.	C	T	UPSTREAM	MODIFIER	B9J08_000440	.	.	hypothetical protein	.	.	.	.	.
scaffold00004	949316	.	A	G	UPSTREAM	MODIFIER	B9J08_000447	CR_07060C_A	CRZ2	hypothetical protein	PF13894.1|zf-C2H2_4[C2H2-type zinc finger];PF00096.21|zf-C2H2[Zinc finger, C2H2 type];PF13465.1|zf-H2C2_2[Zinc-finger double domain]	.	GO:0046872;GO:0003676	.	.
scaffold00004	954396	.	A	T	UPSTREAM	MODIFIER	B9J08_000448	C5_03490C_A	.	hypothetical protein	.	.	.	.	.
scaffold00004	968490	.	A	G	UPSTREAM	MODIFIER	B9J08_000457	C4_06470W_B	.	hypothetical protein	PF10295.4|DUF2406[Uncharacterised protein (DUF2406)]	.	.	.	.
scaffold00004	974732	.	C	A	UPSTREAM	MODIFIER	B9J08_000460	CR_07620W_A	AAT21	hypothetical protein	PF00155.16|Aminotran_1_2[Aminotransferase class I and II]	EC:2.6.1.1[Aspartate transaminase.]	EC:2.6.1.57;GO:0005634;GO:0006532;EC:2.6.1.5;GO:0004069;GO:0005777;EC:2.6.1.9;GO:0080130;EC:2.6.1.1;GO:0005829;GO:0030170	ko00330[Arginine and proline metabolism];ko00350[Tyrosine metabolism];ko00360[Phenylalanine metabolism];ko00400[Phenylalanine, tyrosine and tryptophan biosynthesis];ko00270[Cysteine and methionine metabolism]	.
scaffold00004	994925	.	G	GA	UPSTREAM	MODIFIER	B9J08_000468	CR_07440W_A	ACE2	hypothetical protein	PF13894.1|zf-C2H2_4[C2H2-type zinc finger];PF00096.21|zf-C2H2[Zinc finger, C2H2 type];PF13465.1|zf-H2C2_2[Zinc-finger double domain]	.	GO:0046872;GO:0003676	.	.
scaffold00004	997247	.	C	G	UPSTREAM	MODIFIER	B9J08_000468	CR_07440W_A	ACE2	hypothetical protein	PF13894.1|zf-C2H2_4[C2H2-type zinc finger];PF00096.21|zf-C2H2[Zinc finger, C2H2 type];PF13465.1|zf-H2C2_2[Zinc-finger double domain]	.	GO:0046872;GO:0003676	.	.
scaffold00004	998174	.	C	G	UPSTREAM	MODIFIER	B9J08_000468	CR_07440W_A	ACE2	hypothetical protein	PF13894.1|zf-C2H2_4[C2H2-type zinc finger];PF00096.21|zf-C2H2[Zinc finger, C2H2 type];PF13465.1|zf-H2C2_2[Zinc-finger double domain]	.	GO:0046872;GO:0003676	.	.
scaffold00004	1009846	.	G	T	UPSTREAM	MODIFIER	B9J08_000474	CR_07090W_A	STT4	hypothetical protein	PF00454.22|PI3_PI4_kinase[Phosphatidylinositol 3- and 4-kinase];PF00613.15|PI3Ka[Phosphoinositide 3-kinase family, accessory domain (PIK domain)]	EC:2.7.1.67[1-phosphatidylinositol 4-kinase.]	GO:0016310;GO:0016301;GO:0044464	ko04070[Phosphatidylinositol signaling system]	.
scaffold00004	1022043	.	CT	C	UPSTREAM	MODIFIER	B9J08_000481	C1_13520C_A	MCU1	hypothetical protein	.	.	GO:0015976;GO:0044182;GO:0016021;GO:0005739;GO:0009405	.	TMH:1
scaffold00004	1027284	.	T	C	UPSTREAM	MODIFIER	B9J08_000480	C1_10790W_A	CDC48	cell division control protein 48	PF00004.24|AAA[ATPase family associated with various cellular activities (AAA)];PF13671.1|AAA_33[AAA domain];PF05496.7|RuvB_N[Holliday junction DNA helicase ruvB N-terminus];PF07724.9|AAA_2[AAA domain (Cdc48 subfamily)];PF02359.13|CDC48_N[Cell division protein 48 (CDC48), N-terminal domain];PF02933.12|CDC48_2[Cell division protein 48 (CDC48), domain 2];PF07728.9|AAA_5[AAA domain (dynein-related s…	.	GO:1990112;GO:1990116;GO:0043332;EC:3.6.1.3;GO:0034098;GO:0016485;GO:0000837;GO:0016887;GO:0071712;GO:0030433;GO:0000790;GO:1990171;GO:0034727;GO:0070651;GO:0030970;GO:0005524;GO:1990023;GO:0000839;GO:2001168;GO:0031134;GO:0033047;GO:0071629;GO:0005829;GO:0005886;GO:1900182;GO:0071630;GO:0051228;GO:0016320;GO:0050790;GO:0034517;GO:0072671;GO:0006906;GO:0043130;GO:0009986;GO:0036266;GO:0051301;GO:…	.	.
scaffold00004	1068232	.	C	A	UPSTREAM	MODIFIER	B9J08_000496	C1_02020W_A	.	5-formyltetrahydrofolate cyclo-ligase	TIGR02727[MTHFS_bact: 5-formyltetrahydrofolate cyclo-ligase];PF01812.15|5-FTHF_cyc-lig[5-formyltetrahydrofolate cyclo-ligase family]	.	GO:0008757;GO:0005524;GO:0034968;GO:0030272;GO:0000790;GO:0009396;GO:0046872;GO:0005739;EC:6.3.3.2	.	.
scaffold00003	65368	.	C	A	UPSTREAM	MODIFIER	B9J08_000525	C6_00360C_A	.	hypothetical protein	PF09774.4|Cid2[Caffeine-induced death protein 2]	.	GO:0005758	.	.
scaffold00003	80604	.	C	T	UPSTREAM	MODIFIER	B9J08_000534	CR_10440W_A	.	hypothetical protein	.	.	GO:0090618;GO:0005634;GO:0031391;GO:0003682;GO:0006261;GO:0005739;GO:0000724;GO:0010526;GO:0007064	.	.
scaffold00003	109328	.	TGA	T	UPSTREAM	MODIFIER	B9J08_000552	C6_02190C_A	.	hypothetical protein	PF00069.20|Pkinase[Protein kinase domain];PF07714.12|Pkinase_Tyr[Protein tyrosine kinase]	EC:2.7.1.-[Phosphotransferases with an alcohol group as acceptor.]	GO:0005524;GO:0004674;EC:2.7.11;GO:0006468	.	.
scaffold00003	141222	.	T	TTAAA	UPSTREAM	MODIFIER	B9J08_000571	.	.	hypothetical protein	.	.	.	.	.
scaffold00003	163019	.	A	G	UPSTREAM	MODIFIER	B9J08_000581	CR_07250C_A	.	hypothetical protein	PF05199.8|GMC_oxred_C[GMC oxidoreductase];PF00890.19|FAD_binding_2[FAD binding domain];PF00732.14|GMC_oxred_N[GMC oxidoreductase]	.	GO:0046577;EC:1.1.3.20;GO:0050660;GO:0055114	.	.
scaffold00003	174429	.	C	T	UPSTREAM	MODIFIER	B9J08_000586	C1_08050W_A	.	hypothetical protein	.	.	.	.	.
scaffold00003	274195	.	G	A	UPSTREAM	MODIFIER	B9J08_000631	C4_07190W_A	SEC10	hypothetical protein	PF07393.6|Sec10[Exocyst complex component Sec10]	.	GO:0005634;GO:0044732;GO:0032153;GO:0006893;GO:0051285;GO:0000145;GO:0000920;GO:0005829;GO:0048278;GO:0006887	.	.
scaffold00003	274429	.	A	G	UPSTREAM	MODIFIER	B9J08_000631	C4_07190W_A	SEC10	hypothetical protein	PF07393.6|Sec10[Exocyst complex component Sec10]	.	GO:0005634;GO:0044732;GO:0032153;GO:0006893;GO:0051285;GO:0000145;GO:0000920;GO:0005829;GO:0048278;GO:0006887	.	.
scaffold00003	360880	.	T	A	UPSTREAM	MODIFIER	B9J08_000675	.	.	hypothetical protein	PF07691.7|PA14[PA14 domain]	.	.	.	.
scaffold00003	361305	.	T	A	UPSTREAM	MODIFIER	B9J08_000675	.	.	hypothetical protein	PF07691.7|PA14[PA14 domain]	.	.	.	.
scaffold00003	428421	.	T	C	UPSTREAM	MODIFIER	B9J08_000704	C1_03360W_A	.	hypothetical protein	PF00271.26|Helicase_C[Helicase conserved C-terminal domain];PF00385.19|Chromo[Chromo (CHRromatin Organisation MOdifier) domain];PF13907.1|DUF4208[Domain of unknown function (DUF4208)];PF00176.18|SNF2_N[SNF2 family N-terminal domain]	EC:3.6.4.12[DNA helicase.]	GO:0000124;GO:0000182;GO:0005524;GO:0071441;GO:0031490;GO:0046695;GO:0006369;GO:0035064;GO:0070615;GO:1900050;GO:0006368;GO:0043044;GO:0005739;GO:0042766;GO:0001178;GO:0006363;GO:2000616;GO:0034401;GO:0030874;GO:0016584;GO:0071894;GO:0008094;GO:2000104	.	.
scaffold00003	556178	.	A	G	UPSTREAM	MODIFIER	B9J08_000761	C4_01920W_A	DPM3	hypothetical protein	PF08285.6|DPM3[Dolichol-phosphate mannosyltransferase subunit 3 (DPM3)]	.	GO:0016757;GO:0016021	.	TMH:2
scaffold00003	557817	.	A	T	UPSTREAM	MODIFIER	B9J08_000762	C4_01910W_A	.	hypothetical protein	PF09734.4|Tau95[RNA polymerase III transcription factor (TF)IIIC subunit]	.	GO:0001041;GO:0006359;GO:0043035;GO:0005829;GO:0000127;GO:0000995;GO:0001021;GO:0000999	.	.
scaffold00003	558192	.	G	T	UPSTREAM	MODIFIER	B9J08_000762	C4_01910W_A	.	hypothetical protein	PF09734.4|Tau95[RNA polymerase III transcription factor (TF)IIIC subunit]	.	GO:0001041;GO:0006359;GO:0043035;GO:0005829;GO:0000127;GO:0000995;GO:0001021;GO:0000999	.	.
scaffold00003	558194	.	G	T	UPSTREAM	MODIFIER	B9J08_000762	C4_01910W_A	.	hypothetical protein	PF09734.4|Tau95[RNA polymerase III transcription factor (TF)IIIC subunit]	.	GO:0001041;GO:0006359;GO:0043035;GO:0005829;GO:0000127;GO:0000995;GO:0001021;GO:0000999	.	.
scaffold00003	558195	.	TGCG	T	UPSTREAM	MODIFIER	B9J08_000762	C4_01910W_A	.	hypothetical protein	PF09734.4|Tau95[RNA polymerase III transcription factor (TF)IIIC subunit]	.	GO:0001041;GO:0006359;GO:0043035;GO:0005829;GO:0000127;GO:0000995;GO:0001021;GO:0000999	.	.
scaffold00003	558204	.	C	T	UPSTREAM	MODIFIER	B9J08_000762	C4_01910W_A	.	hypothetical protein	PF09734.4|Tau95[RNA polymerase III transcription factor (TF)IIIC subunit]	.	GO:0001041;GO:0006359;GO:0043035;GO:0005829;GO:0000127;GO:0000995;GO:0001021;GO:0000999	.	.
scaffold00003	561970	.	T	A	UPSTREAM	MODIFIER	B9J08_000766	C4_01200C_A	AAT22	hypothetical protein	PF00155.16|Aminotran_1_2[Aminotransferase class I and II]	EC:2.6.1.1[Aspartate transaminase.]	GO:0009058;GO:0006520;GO:0008483;GO:0030170;GO:0044444	ko00401[Novobiocin biosynthesis];ko00330[Arginine and proline metabolism];ko00950[Isoquinoline alkaloid biosynthesis];ko00360[Phenylalanine metabolism];ko00270[Cysteine and methionine metabolism];ko00710[Carbon fixation in photosynthetic organisms];ko00350[Tyrosine metabolism];ko00400[Phenylalanine, tyrosine and tryptophan biosynthesis];ko00960[Tropane, piperidine and pyridine alkaloid biosynthes…	.
scaffold00003	591628	.	C	CTTAAACACG	UPSTREAM	MODIFIER	B9J08_000777	C1_03400W_A	.	hypothetical protein	PF02752.17|Arrestin_C[Arrestin (or S-antigen), C-terminal domain];PF00339.24|Arrestin_N[Arrestin (or S-antigen), N-terminal domain]	.	GO:0031625	.	.
scaffold00003	711889	.	C	T	UPSTREAM	MODIFIER	B9J08_000829	C6_01500C_A	TRY5	hypothetical protein	PF00096.21|zf-C2H2[Zinc finger, C2H2 type];PF13465.1|zf-H2C2_2[Zinc-finger double domain]	.	GO:0050794	.	.
scaffold00003	712334	.	CGT	C	UPSTREAM	MODIFIER	B9J08_000829	C6_01500C_A	TRY5	hypothetical protein	PF00096.21|zf-C2H2[Zinc finger, C2H2 type];PF13465.1|zf-H2C2_2[Zinc-finger double domain]	.	GO:0050794	.	.
scaffold00003	712673	.	G	GTTTTTTTTTTTTTTTTTTTTTTTTTTT	UPSTREAM	MODIFIER	B9J08_000829	C6_01500C_A	TRY5	hypothetical protein	PF00096.21|zf-C2H2[Zinc finger, C2H2 type];PF13465.1|zf-H2C2_2[Zinc-finger double domain]	.	GO:0050794	.	.
scaffold00003	756974	.	G	C	UPSTREAM	MODIFIER	B9J08_000849	.	.	hypothetical protein	.	.	.	.	.
scaffold00003	779962	.	C	T	UPSTREAM	MODIFIER	B9J08_000861	C2_04210W_A	STE4	hypothetical protein	PF00400.27|WD40[WD domain, G-beta repeat]	.	GO:0010525;GO:0005634;GO:0005834;GO:0045014;GO:0043577;GO:0031138;GO:0032092;GO:0019933;GO:0001403;GO:0030159;GO:0008277;GO:0005829;GO:0004871;GO:0000750;GO:0005937	ko04745[Phototransduction - fly]	.
scaffold00003	864077	.	G	A	UPSTREAM	MODIFIER	B9J08_000905	.	.	hypothetical protein	PF08550.5|DUF1752[Fungal protein of unknown function (DUF1752)]	.	.	.	.
scaffold00003	867633	.	GAC	G	UPSTREAM	MODIFIER	B9J08_000907	C4_06190C_A	MPH1	hypothetical protein	PF04851.10|ResIII[Type III restriction enzyme, res subunit];PF00271.26|Helicase_C[Helicase conserved C-terminal domain];PF00270.24|DEAD[DEAD/DEAH box helicase]	EC:3.6.4.12[DNA helicase.]	GO:0016020;GO:0033567;GO:0005634;GO:0000725;GO:0005524;GO:0032508;GO:0070336;GO:0060543;GO:0043138;GO:0036297	.	.
scaffold00003	922100	.	G	A	UPSTREAM	MODIFIER	B9J08_000926	C1_09830W_A	SKI3	hypothetical protein	PF13371.1|TPR_9[Tetratricopeptide repeat];PF00515.23|TPR_1[Tetratricopeptide repeat];PF13181.1|TPR_8[Tetratricopeptide repeat];PF13414.1|TPR_11[TPR repeat];PF13174.1|TPR_6[Tetratricopeptide repeat];PF07719.12|TPR_2[Tetratricopeptide repeat];PF14559.1|TPR_19[Tetratricopeptide repeat]	.	GO:0070481;GO:0070478;GO:0005829;GO:0055087	.	.
scaffold00003	951511	.	CA	C	UPSTREAM	MODIFIER	B9J08_000938	C6_03790C_A	HGT10	hypothetical protein	PF07690.11|MFS_1[Major Facilitator Superfamily];PF00083.19|Sugar_tr[Sugar (and other) transporter]	.	GO:0055085;GO:0016021;GO:0015295;GO:0015992;GO:0015793;GO:0005886	.	TMH:10
scaffold00003	987823	.	C	G	UPSTREAM	MODIFIER	B9J08_000951	C1_02290C_A	.	hypothetical protein	PF07542.6|ATP12[ATP12 chaperone protein]	.	GO:0033615;GO:0019904;GO:0005739	.	.
scaffold00003	1045006	.	C	CTG	UPSTREAM	MODIFIER	B9J08_000975	C1_02710W_A	FRS2	phenylalanine-tRNA ligase%2C alpha subunit	TIGR00468[pheS: phenylalanine--tRNA ligase, alpha subunit];PF00587.20|tRNA-synt_2b[tRNA synthetase class II core domain (G, H, P, S and T)];PF01409.15|tRNA-synt_2d[tRNA synthetases class II core domain (F)]	EC:6.1.1.20[Phenylalanine--tRNA ligase.]	GO:0006432;GO:0004826;GO:0005524;GO:0005829;GO:0000049;GO:0009328;EC:6.1.1.20	.	.
scaffold00003	1121900	.	TTTTC	T	UPSTREAM	MODIFIER	B9J08_001011	.	.	hypothetical protein	.	.	.	.	.
scaffold00003	1205552	.	A	C	UPSTREAM	MODIFIER	B9J08_001048	C1_01560W_A	SIZ1	hypothetical protein	PF14324.1|PINIT[PINIT domain];PF02891.15|zf-MIZ[MIZ/SP-RING zinc finger];PF11789.3|zf-Nse[Zinc-finger of the MIZ type in Nse subunit];PF02037.22|SAP[SAP domain]	EC:6.3.2.-[Acid--D-amino-acid ligases (peptide synthases).]	GO:0008270;GO:0019789	ko05200[Pathways in cancer];ko05222[Small cell lung cancer];ko05160[Hepatitis C];ko04630[Jak-STAT signaling pathway]	.
scaffold00003	1207941	.	A	G	UPSTREAM	MODIFIER	B9J08_001048	C1_01560W_A	SIZ1	hypothetical protein	PF14324.1|PINIT[PINIT domain];PF02891.15|zf-MIZ[MIZ/SP-RING zinc finger];PF11789.3|zf-Nse[Zinc-finger of the MIZ type in Nse subunit];PF02037.22|SAP[SAP domain]	EC:6.3.2.-[Acid--D-amino-acid ligases (peptide synthases).]	GO:0008270;GO:0019789	ko05200[Pathways in cancer];ko05222[Small cell lung cancer];ko05160[Hepatitis C];ko04630[Jak-STAT signaling pathway]	.
scaffold00003	1220690	.	A	G	UPSTREAM	MODIFIER	B9J08_001053	.	.	hypothetical protein	.	.	GO:0016021	.	TMH:4
scaffold00003	1221172	.	G	A	UPSTREAM	MODIFIER	B9J08_001053	.	.	hypothetical protein	.	.	GO:0016021	.	TMH:4
scaffold00003	1221173	.	A	T	UPSTREAM	MODIFIER	B9J08_001053	.	.	hypothetical protein	.	.	GO:0016021	.	TMH:4
scaffold00003	1221180	.	A	G	UPSTREAM	MODIFIER	B9J08_001053	.	.	hypothetical protein	.	.	GO:0016021	.	TMH:4
scaffold00003	1221181	.	T	C	UPSTREAM	MODIFIER	B9J08_001053	.	.	hypothetical protein	.	.	GO:0016021	.	TMH:4
scaffold00003	1221190	.	G	C	UPSTREAM	MODIFIER	B9J08_001053	.	.	hypothetical protein	.	.	GO:0016021	.	TMH:4
scaffold00003	1221193	.	T	A	UPSTREAM	MODIFIER	B9J08_001053	.	.	hypothetical protein	.	.	GO:0016021	.	TMH:4
scaffold00003	1221200	.	G	A	UPSTREAM	MODIFIER	B9J08_001053	.	.	hypothetical protein	.	.	GO:0016021	.	TMH:4
scaffold00005	4688	.	T	C	UPSTREAM	MODIFIER	B9J08_001064	C6_02420W_A	.	hypothetical protein	PF03009.12|GDPD[Glycerophosphoryl diester phosphodiesterase family]	EC:3.1.4.46[Glycerophosphodiester phosphodiesterase.]	GO:0034478;GO:0036164;GO:0005811;EC:3.1.4.46;GO:0008889;GO:0005739;GO:0034479	.	.
scaffold00005	11587	.	C	G	UPSTREAM	MODIFIER	B9J08_001066	C6_02430W_A	.	hypothetical protein	PF15613.1|WHIM2[WSTF, HB1, Itc1p, MBD9 motif 2];PF10537.4|WAC_Acf1_DNA_bd[ATP-utilising chromatin assembly and remodelling N-terminal];PF02791.12|DDT[DDT domain]	.	.	.	.
scaffold00005	22239	.	GA	G	UPSTREAM	MODIFIER	B9J08_001071	C6_02470W_A	.	hypothetical protein	PF08492.7|SRP72[SRP72 RNA-binding domain]	.	GO:0006614;GO:0005048;GO:0005634;GO:0005786;GO:0005829	.	.
scaffold00005	39549	.	T	C	UPSTREAM	MODIFIER	B9J08_001078	.	.	hypothetical protein	PF09753.4|Use1[Membrane fusion protein Use1]	.	GO:0016021	.	TMH:1
scaffold00005	67251	.	A	T	UPSTREAM	MODIFIER	B9J08_001092	C5_02730C_A	.	hypothetical protein	PF00400.27|WD40[WD domain, G-beta repeat]	.	GO:0002098;GO:0000055;GO:0016226;GO:0005634;GO:0097361	.	.
scaffold00005	73440	.	G	C	UPSTREAM	MODIFIER	B9J08_001098	C3_03180C_A	PNP1	purine nucleoside phosphorylase I%2C inosine and guanosine-specific	PF01048.15|PNP_UDP_1[Phosphorylase superfamily];TIGR01700[PNPH: purine nucleoside phosphorylase I, inosine and guanosine-specific]	EC:2.4.2.1[Purine-nucleoside phosphorylase.]	GO:0046115;GO:0034356;GO:0019358;GO:0005634;GO:0047724;GO:0006148;GO:0004731;GO:0005829;EC:3.2.2.2;GO:0070635;EC:2.4.2.1	ko00240[Pyrimidine metabolism];ko00760[Nicotinate and nicotinamide metabolism]	.
scaffold00005	82967	.	A	T	UPSTREAM	MODIFIER	B9J08_001101	C3_03150W_A	.	hypothetical protein	.	.	.	.	.
scaffold00005	99580	.	A	G	UPSTREAM	MODIFIER	B9J08_001108	CR_02200C_A	RAD51	DNA repair protein rhp51	PF14520.1|HHH_5[Helix-hairpin-helix domain];TIGR02239[recomb_RAD51: DNA repair protein RAD51];PF13481.1|AAA_25[AAA domain];PF08423.6|Rad51[Rad51];PF06745.8|KaiC[KaiC];PF00154.16|RecA[recA bacterial DNA recombination protein]	.	GO:0003691;GO:0005524;GO:0005635;GO:0042148;GO:0043047;GO:0036166;GO:0030998;GO:0000775;GO:0000150;GO:1900429;GO:0000711;GO:0006312;GO:0007533;GO:0044182;GO:0008094;GO:0000724;GO:1990426;GO:0000723	ko05200[Pathways in cancer];ko05212[Pancreatic cancer]	.
scaffold00005	133557	.	G	C	UPSTREAM	MODIFIER	B9J08_001125	C6_03840C_A	SNQ2	hypothetical protein	PF00005.22|ABC_tran[ABC transporter];PF12698.2|ABC2_membrane_3[ABC-2 family transporter protein];PF01061.19|ABC2_membrane[ABC-2 type transporter];PF06422.7|PDR_CDR[CDR ABC transporter];PF14510.1|ABC_trans_N[ABC-transporter extracellular N-terminal]	.	GO:0055085;GO:0035690;GO:0005524;GO:0035376;EC:3.6.3.44;GO:0016021;GO:0008559;GO:0005886	.	TMH:11
scaffold00005	153703	.	T	C	UPSTREAM	MODIFIER	B9J08_001133	CR_02420W_A	.	hypothetical protein	PF04900.7|Fcf1[Fcf1]	.	GO:0000472;GO:0070181;GO:0032040;GO:0005730;GO:0000447;GO:0005739;GO:0000480	.	.
scaffold00005	254472	.	C	T	UPSTREAM	MODIFIER	B9J08_001183	C2_02200W_A	ZRC1	hypothetical protein	PF01545.16|Cation_efflux[Cation efflux family]	.	GO:0098655;GO:0016021;GO:0008324	.	TMH:6
scaffold00005	272044	.	G	T	UPSTREAM	MODIFIER	B9J08_001192	C2_02100W_A	SNF2	hypothetical protein	PF00271.26|Helicase_C[Helicase conserved C-terminal domain];PF14619.1|SnAC[Snf2-ATP coupling, chromatin remodelling complex];PF00439.20|Bromodomain[Bromodomain];PF00176.18|SNF2_N[SNF2 family N-terminal domain]	EC:3.6.4.-[Acting on acid anhydrides; involved in cellular and subcellular movement.]	GO:0042766;GO:1900189;GO:0005524;GO:2000219;GO:0005987;GO:0070577;GO:0044109;GO:0042148;GO:0006302;GO:0031496;GO:0043044;GO:0006261;GO:0016514;GO:0008094;GO:0001102;GO:0061412;GO:0031492	.	.
scaffold00005	289258	.	T	C	UPSTREAM	MODIFIER	B9J08_001197	C2_02040W_A	.	hypothetical protein	.	.	.	.	.
scaffold00005	323161	.	A	AAGATATTAATCTT	UPSTREAM	MODIFIER	B9J08_001217	C2_06110W_A	.	hypothetical protein	PF02833.9|DHHA2[DHHA2 domain];PF01368.15|DHH[DHH family]	EC:3.6.1.11[Exopolyphosphatase.]	GO:0005634;GO:0004309;GO:0006798;EC:3.6.1.11;GO:0005737	.	.
scaffold00005	326936	.	G	A	UPSTREAM	MODIFIER	B9J08_001218	C2_06120C_A	.	hypothetical protein	PF09814.4|HECT_2[HECT-like Ubiquitin-conjugating enzyme (E2)-binding]	.	.	.	.
scaffold00005	451878	.	G	A	UPSTREAM	MODIFIER	B9J08_001279	C1_03440C_A	.	hypothetical protein	PF00171.17|Aldedh[Aldehyde dehydrogenase family]	.	GO:0016620;GO:0055114	.	.
scaffold00005	464726	.	G	T	UPSTREAM	MODIFIER	B9J08_001283	C2_01070W_A	.	hypothetical protein	PF06870.7|RNA_pol_I_A49[A49-like RNA polymerase I associated factor]	.	GO:0006362;GO:0003677;GO:0042790;GO:0001054;GO:0005736	ko00240[Pyrimidine metabolism];ko03020[RNA polymerase]	.
scaffold00005	491846	.	G	C	UPSTREAM	MODIFIER	B9J08_001294	C7_02920W_A	.	hypothetical protein	PF01425.16|Amidase[Amidase]	.	GO:0005634;GO:0005829;GO:0016884	.	.
scaffold00005	491932	.	GGAAGATAAAAAGAAAA	G	UPSTREAM	MODIFIER	B9J08_001294	C7_02920W_A	.	hypothetical protein	PF01425.16|Amidase[Amidase]	.	GO:0005634;GO:0005829;GO:0016884	.	.
scaffold00005	548746	.	A	G	UPSTREAM	MODIFIER	B9J08_001314	C5_00400C_A	.	hypothetical protein	.	.	.	.	.
scaffold00005	555787	.	C	T	UPSTREAM	MODIFIER	B9J08_001317	.	.	hypothetical protein	.	.	.	.	.
scaffold00005	576652	.	T	A	UPSTREAM	MODIFIER	B9J08_001324	C3_03410C_A	.	hypothetical protein	PF03200.11|Glyco_hydro_63[Mannosyl oligosaccharide glucosidase]	.	GO:0004573;GO:0009311;EC:3.2.1.106;GO:0005737	.	.
scaffold00005	581151	.	G	GT	UPSTREAM	MODIFIER	B9J08_001329	C5_01910W_A	GIS2	hypothetical protein	PF13917.1|zf-CCHC_3[Zinc knuckle];PF00098.18|zf-CCHC[Zinc knuckle];PF14392.1|zf-CCHC_4[Zinc knuckle]	.	GO:0010494;GO:0003729;GO:0035690;GO:0042788;GO:0070417;GO:0045727;GO:0000932;GO:0071470;GO:0003697;GO:0008270;GO:0045182	.	.
scaffold00005	591021	.	A	C	UPSTREAM	MODIFIER	B9J08_001335	C1_05210C_A	.	hypothetical protein	.	.	GO:0016021;GO:0005739	.	TMH:2
scaffold00005	597989	.	A	AAG	UPSTREAM	MODIFIER	B9J08_001338	C1_05240C_A	RPT1	26S protease regulatory subunit 7	PF00004.24|AAA[ATPase family associated with various cellular activities (AAA)];PF07728.9|AAA_5[AAA domain (dynein-related subfamily)]	.	GO:0070682;GO:0005634;GO:0008233;GO:0005524;GO:0045899;GO:0006511;GO:0005829;GO:0045732;GO:0008540	.	.
scaffold00005	610776	.	C	CT	UPSTREAM	MODIFIER	B9J08_001345	C7_00060C_A	.	hypothetical protein	PF05191.9|ADK_lid[Adenylate kinase, active site lid];PF00406.17|ADK[Adenylate kinase]	EC:2.7.4.3[Adenylate kinase.]	EC:2.7.4.10;GO:0005759;GO:0005524;GO:0006172;GO:0004017;GO:0046899;GO:0046939;GO:0046041;GO:0005743;GO:0046033;GO:0005525;EC:2.7.4.3;GO:0046039	.	.
scaffold00005	610880	.	CT	C	UPSTREAM	MODIFIER	B9J08_001345	C7_00060C_A	.	hypothetical protein	PF05191.9|ADK_lid[Adenylate kinase, active site lid];PF00406.17|ADK[Adenylate kinase]	EC:2.7.4.3[Adenylate kinase.]	EC:2.7.4.10;GO:0005759;GO:0005524;GO:0006172;GO:0004017;GO:0046899;GO:0046939;GO:0046041;GO:0005743;GO:0046033;GO:0005525;EC:2.7.4.3;GO:0046039	.	.
scaffold00005	612863	.	G	GA	UPSTREAM	MODIFIER	B9J08_001346	C7_00070C_A	.	hypothetical protein	PF04004.8|Leo1[Leo1-like protein]	.	GO:0006353;GO:0003723;GO:0090262;GO:1990269;GO:0001076;GO:0016593;GO:2001173;GO:0006368;GO:0032968;GO:0080182;GO:2001209	.	.
scaffold00005	625738	.	G	A	UPSTREAM	MODIFIER	B9J08_001354	C1_10660W_A	TBP1	TATA-box-binding protein 1	PF00352.16|TBP[Transcription factor TFIID (or TATA-binding protein, TBP)]	.	GO:0070898;GO:0006357;GO:0003743;GO:0001016;GO:0000979;GO:0001186;GO:0003682;GO:1903357;GO:0005668;GO:0001102;GO:0070893;GO:0051123;GO:0005669;GO:0000983;GO:0006413;GO:0000126;GO:0042790;GO:0008301;GO:0001179	ko05016[Huntington's disease]	.
scaffold00005	645967	.	A	AAAGGAGAAG	UPSTREAM	MODIFIER	B9J08_001361	.	.	hypothetical protein	.	.	.	.	.
scaffold00005	651904	.	G	T	UPSTREAM	MODIFIER	B9J08_001364	C4_07040W_A	.	hypothetical protein	PF00067.17|p450[Cytochrome P450]	.	GO:0020037;GO:0016705;GO:0005506;GO:0004497;GO:0055114	.	.
scaffold00005	670966	.	T	C	UPSTREAM	MODIFIER	B9J08_001371	C1_09200W_A	LYS142	hypothetical protein	PF00172.13|Zn_clus[Fungal Zn(2)-Cys(6) binuclear cluster domain];PF11951.3|Fungal_trans_2[Fungal specific transcription factor domain]	.	GO:0000981;GO:0000978;GO:0005634;GO:0045944;GO:0008270;GO:0016021;GO:2001196	.	TMH:1
scaffold00005	672856	.	A	G	UPSTREAM	MODIFIER	B9J08_001371	C1_09200W_A	LYS142	hypothetical protein	PF00172.13|Zn_clus[Fungal Zn(2)-Cys(6) binuclear cluster domain];PF11951.3|Fungal_trans_2[Fungal specific transcription factor domain]	.	GO:0000981;GO:0000978;GO:0005634;GO:0045944;GO:0008270;GO:0016021;GO:2001196	.	TMH:1
scaffold00005	684060	.	A	G	UPSTREAM	MODIFIER	B9J08_001373	C4_04370C_A	VAC7	hypothetical protein	PF12751.2|Vac7[Vacuolar segregation subunit 7]	.	GO:0000329;GO:0010513;GO:0033674;GO:0070772;GO:0016021	.	TMH:1
scaffold00005	716015	.	C	T	UPSTREAM	MODIFIER	B9J08_001388	C4_01880W_A	TYR1	hypothetical protein	PF02737.13|3HCDH_N[3-hydroxyacyl-CoA dehydrogenase, NAD binding domain];PF03807.12|F420_oxidored[NADP oxidoreductase coenzyme F420-dependent];PF02153.12|PDH[Prephenate dehydrogenase];PF03446.10|NAD_binding_2[NAD binding domain of 6-phosphogluconate dehydrogenase]	EC:1.3.1.13[Prephenate dehydrogenase (NADP(+)).]	GO:0006571;GO:0042802;GO:0008977;GO:0055114;GO:0004665;GO:0005829;EC:1.3.1.13;GO:0016021;EC:1.3.1.12	.	.
scaffold00005	724379	.	A	T	UPSTREAM	MODIFIER	B9J08_001393	C4_02130W_A	CYT2	hypothetical protein	PF01265.12|Cyto_heme_lyase[Cytochrome c/c1 heme lyase]	EC:4.4.1.17[Holocytochrome-c synthase.]	GO:0018063;GO:0005634;EC:4.4.1.17;GO:0005829;GO:0005758;GO:0004408	.	.
scaffold00005	729925	.	C	CGA	UPSTREAM	MODIFIER	B9J08_001396	C4_02090C_A	.	hypothetical protein	PF01138.16|RNase_PH[3' exoribonuclease family, domain 1];PF03725.10|RNase_PH_C[3' exoribonuclease family, domain 2]	.	GO:0034473;GO:0070478;GO:0044732;GO:0016075;GO:0000176;GO:0071028;GO:0034476;GO:0000467;GO:0071039;GO:0004527;GO:0000177;GO:0005829;GO:0071051;GO:0071038;GO:0034475	.	.
scaffold00005	744953	.	C	T	UPSTREAM	MODIFIER	B9J08_001405	C4_02170C_A	.	hypothetical protein	PF05057.9|DUF676[Putative serine esterase (DUF676)]	.	GO:0004622;GO:0005811;GO:0016021;GO:0055088;EC:3.1.1.5	.	TMH:1
scaffold00005	800905	.	AATATAC	A	UPSTREAM	MODIFIER	B9J08_001429	C6_03410C_A	APA2	cytochrome b-c1 complex subunit 7	PF02271.11|UCR_14kD[Ubiquinol-cytochrome C reductase complex 14kD subunit];PF09830.4|ATP_transf[ATP adenylyltransferase]	EC:2.7.7.53[ATP adenylyltransferase.]	GO:0005524;GO:0003877;EC:2.7.7.53;GO:0009117	.	.
scaffold00005	806741	.	GA	G	UPSTREAM	MODIFIER	B9J08_001431	C6_02720C_A	.	hypothetical protein	PF10367.4|Vps39_2[Vacuolar sorting protein 39 domain 2];PF05131.9|Pep3_Vps18[Pep3/Vps18/deep orange family]	.	GO:0000329;GO:0006895;GO:0030674;GO:0006904;GO:0000306;GO:0045324;GO:0042144;GO:0032153;GO:0030897;GO:0005829;GO:0008270;GO:0035542;GO:0032889;GO:0033263	.	.
scaffold00005	859857	.	C	T	UPSTREAM	MODIFIER	B9J08_001456	.	.	hypothetical protein	.	.	.	.	.
scaffold00005	916591	.	T	A	UPSTREAM	MODIFIER	B9J08_001476	C5_05370C_A	PRP22	hypothetical protein	PF00271.26|Helicase_C[Helicase conserved C-terminal domain];PF00575.18|S1[S1 RNA binding domain];PF04408.18|HA2[Helicase associated domain (HA2)];PF00270.24|DEAD[DEAD/DEAH box helicase];PF07717.11|OB_NTP_bind[Oligonucleotide/oligosaccharide-binding (OB)-fold]	EC:3.6.4.13[RNA helicase.]	GO:0071007;GO:0000350;GO:0005524;GO:0004004;GO:0071021;GO:0000390;GO:0003676	.	.
scaffold00005	1004171	.	A	T	UPSTREAM	MODIFIER	B9J08_001515	CR_00210W_A	ALK2	hypothetical protein	PF00067.17|p450[Cytochrome P450]	.	GO:0020037;EC:1.14.14;GO:0005506;GO:0016021;GO:0055114;GO:0016712	.	TMH:1
scaffold00005	1017399	.	AT	A	UPSTREAM	MODIFIER	B9J08_001519	C2_08050C_A	SIT1	hypothetical protein	PF07690.11|MFS_1[Major Facilitator Superfamily]	.	GO:0016021	.	TMH:12
scaffold00005	1045302	.	A	G	UPSTREAM	MODIFIER	B9J08_001528	C6_03790C_A	HGT10	hypothetical protein	PF07690.11|MFS_1[Major Facilitator Superfamily];PF00083.19|Sugar_tr[Sugar (and other) transporter]	.	GO:0055085;GO:0016021;GO:0022857	.	TMH:12
scaffold00005	1045303	.	C	T	UPSTREAM	MODIFIER	B9J08_001528	C6_03790C_A	HGT10	hypothetical protein	PF07690.11|MFS_1[Major Facilitator Superfamily];PF00083.19|Sugar_tr[Sugar (and other) transporter]	.	GO:0055085;GO:0016021;GO:0022857	.	TMH:12
scaffold00005	1045358	.	G	C	UPSTREAM	MODIFIER	B9J08_001528	C6_03790C_A	HGT10	hypothetical protein	PF07690.11|MFS_1[Major Facilitator Superfamily];PF00083.19|Sugar_tr[Sugar (and other) transporter]	.	GO:0055085;GO:0016021;GO:0022857	.	TMH:12
scaffold00005	1045360	.	T	A	UPSTREAM	MODIFIER	B9J08_001528	C6_03790C_A	HGT10	hypothetical protein	PF07690.11|MFS_1[Major Facilitator Superfamily];PF00083.19|Sugar_tr[Sugar (and other) transporter]	.	GO:0055085;GO:0016021;GO:0022857	.	TMH:12
scaffold00005	1045368	.	G	T	UPSTREAM	MODIFIER	B9J08_001528	C6_03790C_A	HGT10	hypothetical protein	PF07690.11|MFS_1[Major Facilitator Superfamily];PF00083.19|Sugar_tr[Sugar (and other) transporter]	.	GO:0055085;GO:0016021;GO:0022857	.	TMH:12
scaffold00005	1045403	.	T	A	UPSTREAM	MODIFIER	B9J08_001528	C6_03790C_A	HGT10	hypothetical protein	PF07690.11|MFS_1[Major Facilitator Superfamily];PF00083.19|Sugar_tr[Sugar (and other) transporter]	.	GO:0055085;GO:0016021;GO:0022857	.	TMH:12
scaffold00005	1045418	.	T	G	UPSTREAM	MODIFIER	B9J08_001528	C6_03790C_A	HGT10	hypothetical protein	PF07690.11|MFS_1[Major Facilitator Superfamily];PF00083.19|Sugar_tr[Sugar (and other) transporter]	.	GO:0055085;GO:0016021;GO:0022857	.	TMH:12
scaffold00005	1045419	.	T	G	UPSTREAM	MODIFIER	B9J08_001528	C6_03790C_A	HGT10	hypothetical protein	PF07690.11|MFS_1[Major Facilitator Superfamily];PF00083.19|Sugar_tr[Sugar (and other) transporter]	.	GO:0055085;GO:0016021;GO:0022857	.	TMH:12
scaffold00005	1045435	.	A	G	UPSTREAM	MODIFIER	B9J08_001528	C6_03790C_A	HGT10	hypothetical protein	PF07690.11|MFS_1[Major Facilitator Superfamily];PF00083.19|Sugar_tr[Sugar (and other) transporter]	.	GO:0055085;GO:0016021;GO:0022857	.	TMH:12
scaffold00005	1045502	.	A	T	UPSTREAM	MODIFIER	B9J08_001528	C6_03790C_A	HGT10	hypothetical protein	PF07690.11|MFS_1[Major Facilitator Superfamily];PF00083.19|Sugar_tr[Sugar (and other) transporter]	.	GO:0055085;GO:0016021;GO:0022857	.	TMH:12
scaffold00005	1045503	.	A	T	UPSTREAM	MODIFIER	B9J08_001528	C6_03790C_A	HGT10	hypothetical protein	PF07690.11|MFS_1[Major Facilitator Superfamily];PF00083.19|Sugar_tr[Sugar (and other) transporter]	.	GO:0055085;GO:0016021;GO:0022857	.	TMH:12
scaffold00005	1045515	.	T	C	UPSTREAM	MODIFIER	B9J08_001528	C6_03790C_A	HGT10	hypothetical protein	PF07690.11|MFS_1[Major Facilitator Superfamily];PF00083.19|Sugar_tr[Sugar (and other) transporter]	.	GO:0055085;GO:0016021;GO:0022857	.	TMH:12
scaffold00005	1045521	.	A	G	UPSTREAM	MODIFIER	B9J08_001528	C6_03790C_A	HGT10	hypothetical protein	PF07690.11|MFS_1[Major Facilitator Superfamily];PF00083.19|Sugar_tr[Sugar (and other) transporter]	.	GO:0055085;GO:0016021;GO:0022857	.	TMH:12
scaffold00005	1045524	.	T	A	UPSTREAM	MODIFIER	B9J08_001528	C6_03790C_A	HGT10	hypothetical protein	PF07690.11|MFS_1[Major Facilitator Superfamily];PF00083.19|Sugar_tr[Sugar (and other) transporter]	.	GO:0055085;GO:0016021;GO:0022857	.	TMH:12
scaffold00005	1045526	.	T	A	UPSTREAM	MODIFIER	B9J08_001528	C6_03790C_A	HGT10	hypothetical protein	PF07690.11|MFS_1[Major Facilitator Superfamily];PF00083.19|Sugar_tr[Sugar (and other) transporter]	.	GO:0055085;GO:0016021;GO:0022857	.	TMH:12
scaffold00005	1045531	.	C	T	UPSTREAM	MODIFIER	B9J08_001528	C6_03790C_A	HGT10	hypothetical protein	PF07690.11|MFS_1[Major Facilitator Superfamily];PF00083.19|Sugar_tr[Sugar (and other) transporter]	.	GO:0055085;GO:0016021;GO:0022857	.	TMH:12
scaffold00005	1045532	.	G	T	UPSTREAM	MODIFIER	B9J08_001528	C6_03790C_A	HGT10	hypothetical protein	PF07690.11|MFS_1[Major Facilitator Superfamily];PF00083.19|Sugar_tr[Sugar (and other) transporter]	.	GO:0055085;GO:0016021;GO:0022857	.	TMH:12
scaffold00005	1045556	.	C	T	UPSTREAM	MODIFIER	B9J08_001528	C6_03790C_A	HGT10	hypothetical protein	PF07690.11|MFS_1[Major Facilitator Superfamily];PF00083.19|Sugar_tr[Sugar (and other) transporter]	.	GO:0055085;GO:0016021;GO:0022857	.	TMH:12
scaffold00005	1045581	.	A	C	UPSTREAM	MODIFIER	B9J08_001528	C6_03790C_A	HGT10	hypothetical protein	PF07690.11|MFS_1[Major Facilitator Superfamily];PF00083.19|Sugar_tr[Sugar (and other) transporter]	.	GO:0055085;GO:0016021;GO:0022857	.	TMH:12
scaffold00005	1045592	.	C	T	UPSTREAM	MODIFIER	B9J08_001528	C6_03790C_A	HGT10	hypothetical protein	PF07690.11|MFS_1[Major Facilitator Superfamily];PF00083.19|Sugar_tr[Sugar (and other) transporter]	.	GO:0055085;GO:0016021;GO:0022857	.	TMH:12
scaffold00005	1045606	.	G	A	UPSTREAM	MODIFIER	B9J08_001528	C6_03790C_A	HGT10	hypothetical protein	PF07690.11|MFS_1[Major Facilitator Superfamily];PF00083.19|Sugar_tr[Sugar (and other) transporter]	.	GO:0055085;GO:0016021;GO:0022857	.	TMH:12
scaffold00005	1045733	.	C	CA	UPSTREAM	MODIFIER	B9J08_001528	C6_03790C_A	HGT10	hypothetical protein	PF07690.11|MFS_1[Major Facilitator Superfamily];PF00083.19|Sugar_tr[Sugar (and other) transporter]	.	GO:0055085;GO:0016021;GO:0022857	.	TMH:12
scaffold00005	1045787	.	G	T	UPSTREAM	MODIFIER	B9J08_001528	C6_03790C_A	HGT10	hypothetical protein	PF07690.11|MFS_1[Major Facilitator Superfamily];PF00083.19|Sugar_tr[Sugar (and other) transporter]	.	GO:0055085;GO:0016021;GO:0022857	.	TMH:12
scaffold00005	1045813	.	CA	C	UPSTREAM	MODIFIER	B9J08_001528	C6_03790C_A	HGT10	hypothetical protein	PF07690.11|MFS_1[Major Facilitator Superfamily];PF00083.19|Sugar_tr[Sugar (and other) transporter]	.	GO:0055085;GO:0016021;GO:0022857	.	TMH:12
scaffold00005	1045847	.	T	A	UPSTREAM	MODIFIER	B9J08_001528	C6_03790C_A	HGT10	hypothetical protein	PF07690.11|MFS_1[Major Facilitator Superfamily];PF00083.19|Sugar_tr[Sugar (and other) transporter]	.	GO:0055085;GO:0016021;GO:0022857	.	TMH:12
scaffold00005	1045855	.	T	C	UPSTREAM	MODIFIER	B9J08_001528	C6_03790C_A	HGT10	hypothetical protein	PF07690.11|MFS_1[Major Facilitator Superfamily];PF00083.19|Sugar_tr[Sugar (and other) transporter]	.	GO:0055085;GO:0016021;GO:0022857	.	TMH:12
scaffold00005	1045865	.	G	A	UPSTREAM	MODIFIER	B9J08_001528	C6_03790C_A	HGT10	hypothetical protein	PF07690.11|MFS_1[Major Facilitator Superfamily];PF00083.19|Sugar_tr[Sugar (and other) transporter]	.	GO:0055085;GO:0016021;GO:0022857	.	TMH:12
scaffold00005	1045883	.	G	A	UPSTREAM	MODIFIER	B9J08_001528	C6_03790C_A	HGT10	hypothetical protein	PF07690.11|MFS_1[Major Facilitator Superfamily];PF00083.19|Sugar_tr[Sugar (and other) transporter]	.	GO:0055085;GO:0016021;GO:0022857	.	TMH:12
scaffold00005	1045895	.	C	A	UPSTREAM	MODIFIER	B9J08_001528	C6_03790C_A	HGT10	hypothetical protein	PF07690.11|MFS_1[Major Facilitator Superfamily];PF00083.19|Sugar_tr[Sugar (and other) transporter]	.	GO:0055085;GO:0016021;GO:0022857	.	TMH:12
scaffold00005	1046138	.	T	A	UPSTREAM	MODIFIER	B9J08_001529	C5_05360C_A	.	hypothetical protein	PF00150.13|Cellulase[Cellulase (glycosyl hydrolase family 5)]	.	GO:0004553;GO:0005975	.	.
scaffold00008	28938	.	A	G	UPSTREAM	MODIFIER	B9J08_001538	.	.	hypothetical protein	PF13460.1|NAD_binding_10[NADH(P)-binding];PF05368.8|NmrA[NmrA-like family];PF01370.16|Epimerase[NAD dependent epimerase/dehydratase family]	.	.	.	.
scaffold00008	29418	.	A	T	UPSTREAM	MODIFIER	B9J08_001538	.	.	hypothetical protein	PF13460.1|NAD_binding_10[NADH(P)-binding];PF05368.8|NmrA[NmrA-like family];PF01370.16|Epimerase[NAD dependent epimerase/dehydratase family]	.	.	.	.
scaffold00008	44544	.	G	C	UPSTREAM	MODIFIER	B9J08_001546	C3_02510C_A	SAP8	hypothetical protein	PF00026.18|Asp[Eukaryotic aspartyl protease]	.	EC:3.4.23;GO:0006508;GO:0004190	.	.
scaffold00008	84746	.	C	T	UPSTREAM	MODIFIER	B9J08_001566	C1_11860W_A	.	hypothetical protein	PF00013.24|KH_1[KH domain];PF13014.1|KH_3[KH domain]	.	GO:0030466;GO:0003729;GO:0000781;GO:0008298;GO:0043577;GO:0006348;GO:0045141;GO:0005829;GO:0001965;GO:0005789;GO:0000750;GO:0005844	.	.
scaffold00008	107541	.	G	A	UPSTREAM	MODIFIER	B9J08_001572	C1_11540C_A	CTA3	hypothetical protein	PF12763.2|EF-hand_4[Cytoskeletal-regulatory complex EF hand];PF00627.26|UBA[UBA/TS-N domain]	.	GO:0032467;GO:0043332;GO:0005934;GO:0005935;GO:0030479;GO:0043130;GO:0005509;GO:0006897;GO:0030968	.	.
scaffold00008	108414	.	A	G	UPSTREAM	MODIFIER	B9J08_001574	C1_11560C_A	.	hypothetical protein	PF01926.18|MMR_HSR1[50S ribosome-binding GTPase];PF00009.22|GTP_EFTU[Elongation factor Tu GTP binding domain]	.	GO:0005525	.	.
scaffold00008	172033	.	T	C	UPSTREAM	MODIFIER	B9J08_001603	C1_07850C_A	.	hypothetical protein	PF03256.11|APC10[Anaphase-promoting complex, subunit 10 (APC10)]	.	GO:0031145;GO:0005829;GO:0030234;GO:0031497;GO:0005739;GO:0005680	ko04113[Meiosis - yeast];ko04120[Ubiquitin mediated proteolysis];ko04111[Cell cycle - yeast];ko04914[Progesterone-mediated oocyte maturation];ko04114[Oocyte meiosis]	.
scaffold00008	249828	.	G	T	UPSTREAM	MODIFIER	B9J08_001644	C2_00380C_A	RFA1	hypothetical protein	PF04057.7|Rep-A_N[Replication factor-A protein 1, N-terminal domain];PF08646.5|Rep_fac-A_C[Replication factor-A C terminal domain];PF01336.20|tRNA_anti-codon[OB-fold nucleic acid binding domain]	.	GO:0000781;GO:0016567;GO:0006268;GO:0003690;GO:0006289;GO:0003697;GO:0007131;GO:0005829;GO:0007004;GO:0043565;GO:0006265;GO:0045184;GO:0000722;GO:0000794;GO:0030491;GO:0000724;GO:0005662	ko03430[Mismatch repair];ko03440[Homologous recombination];ko03420[Nucleotide excision repair]	.
scaffold00008	254770	.	GTGGAGGAGA	G	UPSTREAM	MODIFIER	B9J08_001649	C2_00330C_A	HIR1	hypothetical protein	PF07569.6|Hira[TUP1-like enhancer of split];PF09453.5|HIRA_B[HIRA B motif];PF00400.27|WD40[WD domain, G-beta repeat]	.	GO:0005634;GO:0003714;GO:0042802;GO:0000417;GO:0000775;GO:0000122;GO:0006368;GO:0006336	.	.
scaffold00008	261227	.	G	A	UPSTREAM	MODIFIER	B9J08_001650	C2_00320W_A	.	hypothetical protein	PF04420.9|CHD5[CHD5-like protein]	.	GO:0071816;GO:0016021;GO:0005789;GO:0016192;GO:0043529;GO:0000139	.	TMH:3
scaffold00008	283278	.	T	A	UPSTREAM	MODIFIER	B9J08_001665	CR_09420C_A	BGL22	hypothetical protein	PF01915.17|Glyco_hydro_3_C[Glycosyl hydrolase family 3 C-terminal domain];PF00933.16|Glyco_hydro_3[Glycosyl hydrolase family 3 N terminal domain];PF14310.1|Fn3-like[Fibronectin type III-like domain]	EC:3.2.1.21[Beta-glucosidase.]	GO:0008422;EC:3.2.1.21;GO:0030245;GO:0102483;GO:0005886	ko00500[Starch and sucrose metabolism];ko00940[Phenylpropanoid biosynthesis]	.
scaffold00008	347039	.	G	A	UPSTREAM	MODIFIER	B9J08_001690	CR_06980W_A	.	hypothetical protein	PF09811.4|Yae1_N[Essential protein Yae1, N terminal]	.	GO:0006413;GO:0005634;GO:0042273;GO:0005737	.	.
scaffold00008	361235	.	A	T	UPSTREAM	MODIFIER	B9J08_001696	CR_05730C_A	.	hypothetical protein	.	.	.	.	.
scaffold00008	389626	.	T	A	UPSTREAM	MODIFIER	B9J08_001707	CR_02460W_A	.	hypothetical protein	PF00027.24|cNMP_binding[Cyclic nucleotide-binding domain];PF13516.1|LRR_6[Leucine Rich repeat];PF00646.28|F-box[F-box domain];PF12937.2|F-box-like[F-box-like]	.	.	.	.
scaffold00008	445597	.	GA	G	UPSTREAM	MODIFIER	B9J08_001734	C1_04480C_A	TUS1	hypothetical protein	PF15405.1|PH_5[Pleckstrin homology domain];PF00169.24|PH[PH domain];PF00780.17|CNH[CNH domain]	.	GO:0065007	.	.
scaffold00008	450662	.	A	T	UPSTREAM	MODIFIER	B9J08_001739	C3_01990W_A	RNA1	hypothetical protein	PF13516.1|LRR_6[Leucine Rich repeat]	.	GO:0000781;GO:0043547;GO:0030702;GO:0000070;GO:0005829;GO:0006404;GO:0046827;GO:0031965;GO:0000054;GO:0006407;GO:0006409;GO:0000775;GO:0006348;GO:0006606;GO:0051383;GO:0005096	.	.
scaffold00008	470984	.	G	A	UPSTREAM	MODIFIER	B9J08_001746	.	.	hypothetical protein	.	.	.	.	.
scaffold00008	633346	.	CT	C	UPSTREAM	MODIFIER	B9J08_001827	C1_06210W_A	BUD16	pyridoxal kinase	TIGR00687[pyridox_kin: pyridoxal kinase];PF00294.19|PfkB[pfkB family carbohydrate kinase];PF08543.7|Phos_pyr_kin[Phosphomethylpyrimidine kinase]	EC:2.7.1.35[Pyridoxal kinase.]	GO:0042823;GO:0016740	.	.
scaffold00008	671771	.	T	C	UPSTREAM	MODIFIER	B9J08_001843	CR_04010C_A	MRPL40	cell division control protein 31	PF13202.1|EF-hand_5[EF hand];PF13833.1|EF-hand_8[EF-hand domain pair];PF13499.1|EF-hand_7[EF-hand domain pair];PF13405.1|EF-hand_6[EF-hand domain];PF00036.27|EF-hand_1[EF hand]	.	GO:0005840	.	.
scaffold00008	725174	.	A	G	UPSTREAM	MODIFIER	B9J08_001873	C2_10690W_A	TPS3	hypothetical protein	PF00982.16|Glyco_transf_20[Glycosyltransferase family 20];PF02358.11|Trehalose_PPase[Trehalose-phosphatase]	EC:2.4.1.15[Alpha,alpha-trehalose-phosphate synthase (UDP-forming).];EC:3.1.3.12[Trehalose-phosphatase.]	GO:0003824	.	.
scaffold00008	733932	.	G	C	UPSTREAM	MODIFIER	B9J08_001879	C3_07400W_A	.	ribosomal RNA large subunit methyltransferase J	PF01728.14|FtsJ[FtsJ-like methyltransferase]	EC:2.1.1.205[tRNA (cytidine(32)/guanosine(34)-2'-O)-methyltransferase.]	GO:0002128;GO:0005634;GO:0005829;GO:0002181;GO:0008175	.	.
scaffold00008	740866	.	T	TA	UPSTREAM	MODIFIER	B9J08_001883	C3_07360W_A	DLD2	glycolate oxidase%2C subunit GlcD	PF02913.14|FAD-oxidase_C[FAD linked oxidases, C-terminal domain];PF01565.18|FAD_binding_4[FAD binding domain]	EC:1.1.2.4[D-lactate dehydrogenase (cytochrome).]	EC:1.1.2.4;GO:0004458;GO:0050660;GO:0016021;GO:0055114	.	.
scaffold00008	740879	.	G	GTTTTTTTTTTTTTATAGACTTCATGTATTAGAGGA	UPSTREAM	MODIFIER	B9J08_001883	C3_07360W_A	DLD2	glycolate oxidase%2C subunit GlcD	PF02913.14|FAD-oxidase_C[FAD linked oxidases, C-terminal domain];PF01565.18|FAD_binding_4[FAD binding domain]	EC:1.1.2.4[D-lactate dehydrogenase (cytochrome).]	EC:1.1.2.4;GO:0004458;GO:0050660;GO:0016021;GO:0055114	.	.
scaffold00008	740881	.	C	CGTTAGGATTTCAGTGTTGCCACTTCCATTCTAACTCGAAAACTATA	UPSTREAM	MODIFIER	B9J08_001883	C3_07360W_A	DLD2	glycolate oxidase%2C subunit GlcD	PF02913.14|FAD-oxidase_C[FAD linked oxidases, C-terminal domain];PF01565.18|FAD_binding_4[FAD binding domain]	EC:1.1.2.4[D-lactate dehydrogenase (cytochrome).]	EC:1.1.2.4;GO:0004458;GO:0050660;GO:0016021;GO:0055114	.	.
scaffold00008	767378	.	A	G	UPSTREAM	MODIFIER	B9J08_001898	C3_01790C_A	.	hypothetical protein	PF00176.18|SNF2_N[SNF2 family N-terminal domain]	.	.	.	.
scaffold00008	820511	.	A	T	UPSTREAM	MODIFIER	B9J08_001918	C3_06000W_A	AHR1	hypothetical protein	.	.	.	.	.
scaffold00008	820718	.	AT	A	UPSTREAM	MODIFIER	B9J08_001918	C3_06000W_A	AHR1	hypothetical protein	.	.	.	.	.
scaffold00008	866045	.	C	CTA	UPSTREAM	MODIFIER	B9J08_001937	C1_10700C_A	NIT3	hypothetical protein	PF00795.17|CN_hydrolase[Carbon-nitrogen hydrolase]	.	GO:0006807;GO:0005739;GO:0016810	.	.
scaffold00010	63755	.	A	AC	UPSTREAM	MODIFIER	B9J08_001971	CR_04830C_A	.	hypothetical protein	PF12632.2|Vezatin[Mysoin-binding motif of peroxisomes]	.	GO:0017022	.	.
scaffold00010	70531	.	T	A	UPSTREAM	MODIFIER	B9J08_001972	CR_04720C_A	.	hypothetical protein	PF00271.26|Helicase_C[Helicase conserved C-terminal domain];PF00176.18|SNF2_N[SNF2 family N-terminal domain];PF13892.1|DBINO[DNA-binding domain]	EC:3.6.4.12[DNA helicase.]	GO:0051983;GO:0003677;GO:0000781;GO:0005524;GO:0043486;GO:0031011;EC:3.6.1.3;GO:0004386;GO:0032508;GO:0043618;GO:0016887;GO:0000722;GO:0042766;GO:0006281;GO:0006348;GO:0006366;GO:0016584;GO:0045944	.	.
scaffold00010	70936	.	CT	C	UPSTREAM	MODIFIER	B9J08_001972	CR_04720C_A	.	hypothetical protein	PF00271.26|Helicase_C[Helicase conserved C-terminal domain];PF00176.18|SNF2_N[SNF2 family N-terminal domain];PF13892.1|DBINO[DNA-binding domain]	EC:3.6.4.12[DNA helicase.]	GO:0051983;GO:0003677;GO:0000781;GO:0005524;GO:0043486;GO:0031011;EC:3.6.1.3;GO:0004386;GO:0032508;GO:0043618;GO:0016887;GO:0000722;GO:0042766;GO:0006281;GO:0006348;GO:0006366;GO:0016584;GO:0045944	.	.
scaffold00010	133454	.	A	G	UPSTREAM	MODIFIER	B9J08_002005	C3_03680W_A	.	hypothetical protein	PF00155.16|Aminotran_1_2[Aminotransferase class I and II];PF01041.12|DegT_DnrJ_EryC1[DegT/DnrJ/EryC1/StrS aminotransferase family];PF00266.14|Aminotran_5[Aminotransferase class-V];PF00282.14|Pyridoxal_deC[Pyridoxal-dependent decarboxylase conserved domain]	EC:4.1.2.27[Sphinganine-1-phosphate aldolase.]	GO:0008117;GO:0009267;GO:0097038;GO:0019722;EC:4.1.2.27;GO:0019752;GO:0016831;GO:0006665;GO:0032541;GO:0016021;GO:0030170	.	TMH:1
scaffold00010	162966	.	C	A	UPSTREAM	MODIFIER	B9J08_002020	C1_01330C_A	DUT1	deoxyuridine 5'-triphosphate nucleotidohydrolase	PF00692.14|dUTPase[dUTPase]	EC:3.6.1.23[dUTP diphosphatase.]	GO:0035870;GO:0046081;GO:0005634;GO:0006226;GO:0005737;GO:0035863;GO:0046872;GO:0004170;EC:3.6.1.23	.	.
scaffold00010	193853	.	A	G	UPSTREAM	MODIFIER	B9J08_002034	C1_13220C_A	AKR1	hypothetical protein	PF13857.1|Ank_5[Ankyrin repeats (many copies)];PF13606.1|Ank_3[Ankyrin repeat];PF01529.15|zf-DHHC[DHHC palmitoyltransferase];PF12796.2|Ank_2[Ankyrin repeats (3 copies)];PF13637.1|Ank_4[Ankyrin repeats (many copies)];PF00023.25|Ank[Ankyrin repeat]	.	GO:0098588;EC:2.3.1.225;GO:0019706;GO:0044446;GO:0005768;GO:0005794;GO:0016021;GO:0008270	.	TMH:6
scaffold00010	221370	.	T	G	UPSTREAM	MODIFIER	B9J08_002043	C4_00890W_A	ARO1	pentafunctional AROM polypeptide	PF13207.1|AAA_17[AAA domain];PF01202.17|SKI[Shikimate kinase];PF01761.15|DHQ_synthase[3-dehydroquinate synthase];PF00275.15|EPSP_synthase[EPSP synthase (3-phosphoshikimate 1-carboxyvinyltransferase)];PF08501.6|Shikimate_dh_N[Shikimate dehydrogenase substrate binding domain];PF13685.1|Fe-ADH_2[Iron-containing alcohol dehydrogenase];TIGR01356[aroA: 3-phosphoshikimate 1-carboxyvinyltransferase];PF01…	EC:2.5.1.19[3-phosphoshikimate 1-carboxyvinyltransferase.];EC:4.2.1.10[3-dehydroquinate dehydratase.];EC:4.2.3.4[3-dehydroquinate synthase.];EC:1.1.1.25[Shikimate dehydrogenase.];EC:2.7.1.71[Shikimate kinase.]	GO:0003866;EC:4.2.1.10;GO:0016310;GO:0009423;GO:0004765;GO:0005524;EC:2.7.1.71;GO:0055114;GO:0009073;GO:0005829;GO:0003855;EC:4.2.3.4;GO:0003856;EC:1.1.1.282;GO:0046872;EC:2.5.1.19;EC:1.1.1.25;GO:0004764	.	.
scaffold00010	249923	.	A	G	UPSTREAM	MODIFIER	B9J08_002058	C5_01350W_A	.	hypothetical protein	PF06398.6|Pex24p[Integral peroxisomal membrane peroxin]	.	GO:0007031;GO:0016021;GO:0005778	.	TMH:2
scaffold00010	271780	.	A	G	UPSTREAM	MODIFIER	B9J08_002071	CR_06820W_A	.	hypothetical protein	PF10315.4|DUF2416[Protein of unknown function (DUF2416)]	.	GO:0005739	.	.
scaffold00010	288244	.	G	A	UPSTREAM	MODIFIER	B9J08_002078	CR_07050C_A	URA2	protein URA2	PF02142.17|MGS[MGS-like domain];TIGR01368[CPSaseIIsmall: carbamoyl-phosphate synthase, small subunit];TIGR01369[CPSaseII_lrg: carbamoyl-phosphate synthase, large subunit];PF07478.8|Dala_Dala_lig_C[D-ala D-ala ligase C-terminus];PF00185.19|OTCace[Aspartate/ornithine carbamoyltransferase, Asp/Orn binding domain];PF00289.17|CPSase_L_chain[Carbamoyl-phosphate synthase L chain, N-terminal domain];PF02…	EC:2.1.3.2[Aspartate carbamoyltransferase.];EC:6.3.5.5[Carbamoyl-phosphate synthase (glutamine-hydrolyzing).]	GO:0003922;GO:0016597;GO:0005524;GO:0004070;GO:0004088;EC:6.3.5.2;GO:0006541;GO:0046872;GO:0005829;EC:2.1.3.2;EC:3.5.2.3;GO:0004151;GO:0006207;EC:6.3.5.5	ko00250[Alanine, aspartate and glutamate metabolism]	.
scaffold00010	345042	.	A	G	UPSTREAM	MODIFIER	B9J08_002104	.	.	hypothetical protein	.	.	.	.	.
scaffold00010	585074	.	T	A	UPSTREAM	MODIFIER	B9J08_002210	C4_02800W_A	RPC53	hypothetical protein	PF05132.9|RNA_pol_Rpc4[RNA polymerase III RPC4]	.	GO:0003899;GO:0003677;EC:2.7.7.6;GO:0042797;GO:0005666	ko04623[Cytosolic DNA-sensing pathway];ko00240[Pyrimidine metabolism];ko03020[RNA polymerase]	.
scaffold00010	602118	.	G	GTT	UPSTREAM	MODIFIER	B9J08_002220	CR_07240C_A	CLG1	hypothetical protein	.	.	GO:0045859;GO:0016239;GO:0005634;GO:0000307;GO:0016538	.	.
scaffold00009	27979	.	C	G	UPSTREAM	MODIFIER	B9J08_002247	.	.	hypothetical protein	.	.	.	.	.
scaffold00009	33407	.	T	C	UPSTREAM	MODIFIER	B9J08_002250	C7_00280W_A	HGT12	hypothetical protein	PF07690.11|MFS_1[Major Facilitator Superfamily];PF00083.19|Sugar_tr[Sugar (and other) transporter]	.	GO:0036180;GO:0036244;GO:0036170;GO:0035428;GO:0009267;GO:0015578;GO:0005355;GO:0036178;GO:0005353;GO:0016021;GO:0005886	.	TMH:12
scaffold00009	34801	.	T	C	UPSTREAM	MODIFIER	B9J08_002250	C7_00280W_A	HGT12	hypothetical protein	PF07690.11|MFS_1[Major Facilitator Superfamily];PF00083.19|Sugar_tr[Sugar (and other) transporter]	.	GO:0036180;GO:0036244;GO:0036170;GO:0035428;GO:0009267;GO:0015578;GO:0005355;GO:0036178;GO:0005353;GO:0016021;GO:0005886	.	TMH:12
scaffold00009	54366	.	C	T	UPSTREAM	MODIFIER	B9J08_002255	.	.	hypothetical protein	.	.	.	.	.
scaffold00009	67923	.	A	G	UPSTREAM	MODIFIER	B9J08_002262	C3_05830W_A	KRE6	hypothetical protein	PF03935.10|SKN1[Beta-glucan synthesis-associated protein (SKN1)]	.	GO:0004553;GO:0005975;GO:0016021	.	TMH:1
scaffold00009	68503	.	C	A	UPSTREAM	MODIFIER	B9J08_002262	C3_05830W_A	KRE6	hypothetical protein	PF03935.10|SKN1[Beta-glucan synthesis-associated protein (SKN1)]	.	GO:0004553;GO:0005975;GO:0016021	.	TMH:1
scaffold00009	131810	.	C	A	UPSTREAM	MODIFIER	B9J08_002291	C1_11650W_A	EGD1	nascent polypeptide-associated complex subunit beta	PF01849.13|NAC[NAC domain]	.	GO:0003677;GO:0005634;GO:0006355;GO:0006351;GO:0015031;GO:0005737	.	.
scaffold00009	140722	.	G	A	UPSTREAM	MODIFIER	B9J08_002294	C1_11280W_A	.	hypothetical protein	PF13893.1|RRM_5[RNA recognition motif. (a.k.a. RRM, RBD, or RNP domain)];PF00076.17|RRM_1[RNA recognition motif. (a.k.a. RRM, RBD, or RNP domain)]	.	GO:0033120;GO:0071007;GO:0071006;GO:0000974;GO:0045292;GO:0017070;GO:0036002;GO:0046872;GO:0000166;GO:0045787;GO:0000387	.	.
scaffold00009	269259	.	T	C	UPSTREAM	MODIFIER	B9J08_002350	C1_13860C_A	GND1	6-phosphogluconate dehydrogenase%2C decarboxylating	PF00393.14|6PGD[6-phosphogluconate dehydrogenase, C-terminal domain];TIGR00873[gnd: 6-phosphogluconate dehydrogenase (decarboxylating)];PF03446.10|NAD_binding_2[NAD binding domain of 6-phosphogluconate dehydrogenase]	EC:1.1.1.44[Phosphogluconate dehydrogenase (decarboxylating).]	GO:0050661;GO:0004616;GO:0005829;GO:0055114;GO:0009051;EC:1.1.1.44	ko00480[Glutathione metabolism]	.
scaffold00009	270468	.	C	A	UPSTREAM	MODIFIER	B9J08_002350	C1_13860C_A	GND1	6-phosphogluconate dehydrogenase%2C decarboxylating	PF00393.14|6PGD[6-phosphogluconate dehydrogenase, C-terminal domain];TIGR00873[gnd: 6-phosphogluconate dehydrogenase (decarboxylating)];PF03446.10|NAD_binding_2[NAD binding domain of 6-phosphogluconate dehydrogenase]	EC:1.1.1.44[Phosphogluconate dehydrogenase (decarboxylating).]	GO:0050661;GO:0004616;GO:0005829;GO:0055114;GO:0009051;EC:1.1.1.44	ko00480[Glutathione metabolism]	.
scaffold00009	285356	.	TC	T	UPSTREAM	MODIFIER	B9J08_002354	C3_01200W_B	UTP20	hypothetical protein	PF07539.7|DRIM[Down-regulated in metastasis]	.	GO:0030686;GO:0005654;GO:0000472;GO:0000447;GO:0005737;GO:0000480;GO:0005730;GO:0032040;GO:0030688	.	.
scaffold00009	362014	.	A	G	UPSTREAM	MODIFIER	B9J08_002397	C2_09690C_A	.	hypothetical protein	.	.	.	.	.
scaffold00009	366784	.	G	A	UPSTREAM	MODIFIER	B9J08_002400	C2_09730C_A	IPK2	hypothetical protein	PF03770.11|IPK[Inositol polyphosphate kinase]	.	GO:0030674;GO:0000827;GO:0046854;GO:0032958;EC:2.7.1.127;GO:0000122;GO:0005829;EC:2.7.1.151;GO:0000821;GO:0035004;GO:0005634;GO:0000823;GO:0008440;GO:0000824;GO:0045944;GO:0000825;GO:0050821	.	.
scaffold00009	591594	.	T	C	UPSTREAM	MODIFIER	B9J08_002493	.	.	hypothetical protein	.	.	GO:0016020	.	.
scaffold00009	593916	.	C	T	UPSTREAM	MODIFIER	B9J08_002494	C5_03760C_A	MTR10	hypothetical protein	PF08389.7|Xpo1[Exportin 1-like protein]	.	GO:0005635;GO:0008139;GO:0006886;GO:0008536;GO:0005829;GO:0006609;GO:0006404;GO:0051031	.	.
scaffold00009	602625	.	T	C	UPSTREAM	MODIFIER	B9J08_002498	.	.	hypothetical protein	.	.	GO:0016021	.	TMH:1
scaffold00009	629213	.	G	C	UPSTREAM	MODIFIER	B9J08_002511	C1_13750C_A	.	hypothetical protein	.	.	GO:0016021	.	TMH:1
scaffold00009	647743	.	T	C	UPSTREAM	MODIFIER	B9J08_002523	C4_05890W_A	.	hypothetical protein	PF10262.4|Rdx[Rdx family]	.	GO:0008430;GO:0045454	.	.
scaffold00009	647873	.	T	C	UPSTREAM	MODIFIER	B9J08_002523	C4_05890W_A	.	hypothetical protein	PF10262.4|Rdx[Rdx family]	.	GO:0008430;GO:0045454	.	.
scaffold00009	668206	.	G	C	UPSTREAM	MODIFIER	B9J08_002532	C2_02930C_A	.	hypothetical protein	PF12753.2|Nro1[Nuclear pore complex subunit Nro1]	.	GO:0051171;GO:0010468;GO:0005634;GO:0006415;GO:0080090;GO:2000112	.	.
scaffold00009	675549	.	T	TA	UPSTREAM	MODIFIER	B9J08_002531	C2_02940W_A	MET1	hypothetical protein	PF13241.1|NAD_binding_7[Putative NAD(P)-binding];PF00590.15|TP_methylase[Tetrapyrrole (Corrin/Porphyrin) Methylases]	EC:2.1.1.107[Uroporphyrinogen-III C-methyltransferase.]	GO:0000103;GO:0019354;GO:0043115;GO:0055114;EC:2.1.1.107;GO:0004851;EC:1.3.1.76;GO:0032259	.	.
scaffold00009	704013	.	T	G	UPSTREAM	MODIFIER	B9J08_002544	CR_03900W_A	HST7	hypothetical protein	PF00069.20|Pkinase[Protein kinase domain];PF07714.12|Pkinase_Tyr[Protein tyrosine kinase]	EC:2.7.12.2[Mitogen-activated protein kinase kinase.]	GO:0007124;GO:0005524;GO:0071507;GO:0043332;GO:0000751;GO:0032153;GO:0001403;GO:0005829;GO:0016021;GO:0071508;GO:0010525;GO:0005634;GO:0051286;GO:0001402;GO:0000196;GO:0004674;EC:2.7.11;GO:0004708;GO:1903695	.	TMH:1
scaffold00009	705605	.	A	T	UPSTREAM	MODIFIER	B9J08_002545	CR_03890W_A	WOR3	hypothetical protein	.	.	GO:0036166	.	.
scaffold00009	716852	.	T	G	UPSTREAM	MODIFIER	B9J08_002549	C5_02290W_A	PDE1	hypothetical protein	PF02112.10|PDEase_II[cAMP phosphodiesterases class-II];PF12706.2|Lactamase_B_2[Beta-lactamase superfamily domain]	EC:3.1.4.17[3',5'-cyclic-nucleotide phosphodiesterase.]	GO:2000480;GO:0005634;GO:0043949;GO:0047555;GO:0019933;GO:0071333;GO:1902660;GO:0051447;GO:0006198;GO:0006995;GO:0060238;GO:0005829;GO:0004115;EC:3.1.4.35;GO:0030818	.	.
scaffold00009	734152	.	T	C	UPSTREAM	MODIFIER	B9J08_002561	.	.	hypothetical protein	.	.	.	.	.
scaffold00009	774853	.	C	G	UPSTREAM	MODIFIER	B9J08_002584	.	.	hypothetical protein	.	.	.	.	.
scaffold00001	5224	.	C	G	UPSTREAM	MODIFIER	B9J08_002587	C3_04200W_A	AFP99	agmatinase	PF00491.16|Arginase[Arginase family]	EC:3.5.3.11[Agmatinase.]	GO:0016020;GO:0046872;GO:0016813	.	.
scaffold00001	41502	.	A	C	UPSTREAM	MODIFIER	B9J08_002606	CR_08470W_A	.	hypothetical protein	PF12326.3|EOS1[N-glycosylation protein]	.	GO:0034599;GO:0006487;GO:0016021;GO:0005789	.	TMH:4
scaffold00001	54930	.	C	CGCTGGAG	UPSTREAM	MODIFIER	B9J08_002612	CR_00280C_A	.	hypothetical protein	.	.	.	.	.
scaffold00001	91741	.	A	AT	UPSTREAM	MODIFIER	B9J08_002628	C3_04020C_A	ZCF16	hypothetical protein	PF00172.13|Zn_clus[Fungal Zn(2)-Cys(6) binuclear cluster domain]	.	GO:0016020;GO:0035948;GO:0000978;GO:0005634;GO:2000218;GO:0008270;GO:0001077;GO:0061414;GO:0006366	.	.
scaffold00001	111577	.	AT	A	UPSTREAM	MODIFIER	B9J08_002636	C3_02160C_A	.	hypothetical protein	.	.	GO:0000166;GO:0003676	.	.
scaffold00001	120551	.	C	CAAAT	UPSTREAM	MODIFIER	B9J08_002642	CR_01100C_A	.	cytochrome c oxidase-assembly factor COX23%2C mitochondrial	.	.	GO:0005758;GO:0016531;GO:0006825	.	.
scaffold00001	182545	.	A	T	UPSTREAM	MODIFIER	B9J08_002666	C4_01100C_A	AGP2	hypothetical protein	PF00324.16|AA_permease[Amino acid permease];PF13520.1|AA_permease_2[Amino acid permease]	.	GO:0003333;GO:0016021;GO:0015171	.	TMH:12
scaffold00001	255526	.	T	TA	UPSTREAM	MODIFIER	B9J08_002691	CR_07790C_A	YHB1	hypothetical protein	PF00175.16|NAD_binding_1[Oxidoreductase NAD-binding domain];PF00970.19|FAD_binding_6[Oxidoreductase FAD-binding domain];PF00042.17|Globin[Globin]	EC:1.14.12.17[Nitric oxide dioxygenase.]	GO:0020037;GO:0005634;GO:0005829;GO:0055114;GO:0019825;GO:0016491	.	.
scaffold00001	295119	.	A	T	UPSTREAM	MODIFIER	B9J08_002712	C7_03250C_B	PDI1	protein disulfide-isomerase domain	TIGR01126[pdi_dom: protein disulfide-isomerase domain];PF00085.15|Thioredoxin[Thioredoxin];PF13848.1|Thioredoxin_6[Thioredoxin-like domain]	EC:5.3.4.1[Protein disulfide-isomerase.]	GO:0005783;GO:0016853;GO:0045454	.	.
scaffold00001	356116	.	A	G	UPSTREAM	MODIFIER	B9J08_002747	.	.	hypothetical protein	.	.	.	.	.
scaffold00001	380263	.	A	AT	UPSTREAM	MODIFIER	B9J08_002759	CR_10140W_A	.	NADH dehydrogenase (quinone)%2C G subunit	TIGR01973[NuoG: NADH dehydrogenase (quinone), G subunit];PF10588.4|NADH-G_4Fe-4S_3[NADH-ubiquinone oxidoreductase-G iron-sulfur binding region];PF09326.6|DUF1982[Domain of unknown function (DUF1982)];PF13510.1|Fer2_4[2Fe-2S iron-sulfur cluster binding domain];PF00384.17|Molybdopterin[Molybdopterin oxidoreductase];PF00111.22|Fer2[2Fe-2S iron-sulfur cluster binding domain]	EC:1.6.99.3[NADH dehydrogenase.];EC:1.6.5.3[NADH:ubiquinone reductase (H(+)-translocating).]	GO:0009055;GO:0016020;EC:1.6.5.3;GO:0042773;GO:0051536;GO:0008137	ko05016[Huntington's disease];ko05010[Alzheimer's disease];ko05012[Parkinson's disease]	.
scaffold00001	380267	.	A	C	UPSTREAM	MODIFIER	B9J08_002759	CR_10140W_A	.	NADH dehydrogenase (quinone)%2C G subunit	TIGR01973[NuoG: NADH dehydrogenase (quinone), G subunit];PF10588.4|NADH-G_4Fe-4S_3[NADH-ubiquinone oxidoreductase-G iron-sulfur binding region];PF09326.6|DUF1982[Domain of unknown function (DUF1982)];PF13510.1|Fer2_4[2Fe-2S iron-sulfur cluster binding domain];PF00384.17|Molybdopterin[Molybdopterin oxidoreductase];PF00111.22|Fer2[2Fe-2S iron-sulfur cluster binding domain]	EC:1.6.99.3[NADH dehydrogenase.];EC:1.6.5.3[NADH:ubiquinone reductase (H(+)-translocating).]	GO:0009055;GO:0016020;EC:1.6.5.3;GO:0042773;GO:0051536;GO:0008137	ko05016[Huntington's disease];ko05010[Alzheimer's disease];ko05012[Parkinson's disease]	.
scaffold00001	473123	.	C	T	UPSTREAM	MODIFIER	B9J08_002811	C5_01000C_A	.	hypothetical protein	.	.	GO:0016021;GO:0005886	.	TMH:1
scaffold00001	475056	.	T	G	UPSTREAM	MODIFIER	B9J08_002813	C5_01580C_A	CEF3	elongation factor 3	PF00005.22|ABC_tran[ABC transporter]	.	GO:0005524;GO:0003746;EC:3.6.1.3;GO:0006414;GO:0005737;GO:0016887	.	.
scaffold00001	485568	.	A	G	UPSTREAM	MODIFIER	B9J08_002816	C1_07200W_A	YMC1	hypothetical protein	PF00153.22|Mito_carr[Mitochondrial carrier protein]	.	GO:0055085;GO:0016021	.	.
scaffold00001	564941	.	A	C	UPSTREAM	MODIFIER	B9J08_002849	C3_00790W_A	.	hypothetical protein	PF00069.20|Pkinase[Protein kinase domain];PF07714.12|Pkinase_Tyr[Protein tyrosine kinase]	.	GO:0007124;GO:0006006;GO:0000902;GO:0042493;GO:0005524;GO:0004674;EC:2.7.11;GO:0031954;GO:0007117;GO:0046777	.	.
scaffold00001	573589	.	C	T	UPSTREAM	MODIFIER	B9J08_002853	C3_00750W_B	LYS144	hypothetical protein	PF00172.13|Zn_clus[Fungal Zn(2)-Cys(6) binuclear cluster domain];PF11951.3|Fungal_trans_2[Fungal specific transcription factor domain]	.	GO:0006357;GO:0000981;GO:0005634;GO:0008270	.	.
scaffold00001	650925	.	G	A	UPSTREAM	MODIFIER	B9J08_002887	C1_08240C_A	.	hypothetical protein	PF00300.17|His_Phos_1[Histidine phosphatase superfamily (branch 1)]	.	.	.	.
scaffold00001	653896	.	G	A	UPSTREAM	MODIFIER	B9J08_002888	C1_08220W_A	CCR4	hypothetical protein	PF00560.28|LRR_1[Leucine Rich Repeat];PF12799.2|LRR_4[Leucine Rich repeats (2 copies)];PF03372.18|Exo_endo_phos[Endonuclease/Exonuclease/phosphatase family];PF13504.1|LRR_7[Leucine rich repeat];PF13855.1|LRR_8[Leucine rich repeat]	.	GO:0003723;GO:0036170;GO:0009267;EC:3.1.13.4;GO:0000932;GO:0006368;GO:0032968;GO:0090503;GO:0000289;GO:0009272;GO:0055091;GO:0004535;GO:0007089;GO:0036180;GO:0071216;GO:0016593;GO:0048478;GO:0030015;GO:0000076;GO:0046872;GO:0009405	.	.
scaffold00001	712481	.	A	AT	UPSTREAM	MODIFIER	B9J08_002921	C5_01540W_A	.	40S ribosomal protein S11-A	PF00366.15|Ribosomal_S17[Ribosomal protein S17];TIGR03630[arch_S17P: archaeal ribosomal protein S17P]	.	GO:0005840;GO:0006412;GO:0003735	.	.
scaffold00001	731642	.	T	G	UPSTREAM	MODIFIER	B9J08_002932	C5_03310C_A	PCL1	hypothetical protein	PF08613.6|Cyclin[Cyclin];PF00134.18|Cyclin_N[Cyclin, N-terminal domain]	.	GO:0016239;GO:0005634;GO:0000307;GO:0032878;GO:0016538;GO:0000131;GO:0031106;GO:0000079;GO:0019901	.	.
scaffold00001	732964	.	T	A	UPSTREAM	MODIFIER	B9J08_002932	C5_03310C_A	PCL1	hypothetical protein	PF08613.6|Cyclin[Cyclin];PF00134.18|Cyclin_N[Cyclin, N-terminal domain]	.	GO:0016239;GO:0005634;GO:0000307;GO:0032878;GO:0016538;GO:0000131;GO:0031106;GO:0000079;GO:0019901	.	.
scaffold00001	766243	.	C	G	UPSTREAM	MODIFIER	B9J08_002948	C2_04800C_A	MDM10	hypothetical protein	PF12519.3|DUF3722[Protein of unknown function (DUF3722)]	.	GO:1990456;GO:0045040;GO:0031307;GO:0051654;GO:0001401;GO:0032865;GO:0015914;GO:0070096;GO:0000002	.	.
scaffold00001	786496	.	A	G	UPSTREAM	MODIFIER	B9J08_002957	C2_05670C_A	.	tRNA-intron endonuclease	TIGR00324[endA: tRNA-intron endonuclease];PF01974.12|tRNA_int_endo[tRNA intron endonuclease, catalytic C-terminal domain]	EC:3.1.27.9[tRNA-intron endonuclease.]	EC:3.1.27.9;GO:0006388;GO:0090502;GO:0000213;GO:0003676	.	.
scaffold00001	825115	.	G	A	UPSTREAM	MODIFIER	B9J08_002979	CR_03340C_A	.	hypothetical protein	PF11719.3|Drc1-Sld2[DNA replication and checkpoint protein]	.	GO:0003688;GO:0000727;GO:0000733;GO:0006270;GO:0031261;GO:0033314;GO:0003697;GO:0031333;GO:0071163	.	.
scaffold00001	1033479	.	T	A	UPSTREAM	MODIFIER	B9J08_003095	C3_05150W_A	.	hypothetical protein	PF14259.1|RRM_6[RNA recognition motif (a.k.a. RRM, RBD, or RNP domain)];PF13893.1|RRM_5[RNA recognition motif. (a.k.a. RRM, RBD, or RNP domain)];PF00076.17|RRM_1[RNA recognition motif. (a.k.a. RRM, RBD, or RNP domain)]	.	GO:0072423;GO:0010494;GO:0003729;GO:0000166;GO:0006379;GO:0006378;GO:0005849	.	.
scaffold00001	1053511	.	T	C	UPSTREAM	MODIFIER	B9J08_003106	C2_08020C_A	.	hypothetical protein	PF13202.1|EF-hand_5[EF hand]	.	GO:0007121;GO:0005509;GO:0005829;GO:0008270;GO:0003400;GO:0005935;GO:0007120	.	.
scaffold00001	1076657	.	C	G	UPSTREAM	MODIFIER	B9J08_003117	C5_04080C_A	.	hypothetical protein	PF12542.3|CWC25[Pre-mRNA splicing factor];PF10197.4|Cir_N[N-terminal domain of CBF1 interacting co-repressor CIR]	.	GO:0005684;GO:0000398	.	.
scaffold00001	1087134	.	G	T	UPSTREAM	MODIFIER	B9J08_003126	C2_04590C_A	QCR8	hypothetical protein	PF02939.11|UcrQ[UcrQ family]	.	EC:1.10.2.2;GO:1902600;GO:0008121;GO:0016021;GO:0005750;GO:0009060;GO:0006122	ko05016[Huntington's disease];ko04260[Cardiac muscle contraction];ko05010[Alzheimer's disease];ko05012[Parkinson's disease]	.
scaffold00001	1088095	.	T	C	UPSTREAM	MODIFIER	B9J08_003126	C2_04590C_A	QCR8	hypothetical protein	PF02939.11|UcrQ[UcrQ family]	.	EC:1.10.2.2;GO:1902600;GO:0008121;GO:0016021;GO:0005750;GO:0009060;GO:0006122	ko05016[Huntington's disease];ko04260[Cardiac muscle contraction];ko05010[Alzheimer's disease];ko05012[Parkinson's disease]	.
scaffold00001	1102818	.	A	T	UPSTREAM	MODIFIER	B9J08_003130	C2_04640C_A	SNU114	hypothetical protein	PF01926.18|MMR_HSR1[50S ribosome-binding GTPase];PF00679.19|EFG_C[Elongation factor G C-terminus];PF08477.8|Miro[Miro-like protein];PF00009.22|GTP_EFTU[Elongation factor Tu GTP binding domain];PF03764.13|EFG_IV[Elongation factor G, domain IV]	.	GO:0000349;GO:0000244;GO:0000388;GO:0005682;GO:0005525;GO:0030623;GO:0003924;GO:0046540	.	.
scaffold00001	1231801	.	A	T	UPSTREAM	MODIFIER	B9J08_003201	C2_04870C_A	.	hypothetical protein	PF11732.3|Thoc2[Transcription- and export-related complex subunit];PF11262.3|Tho2[Transcription factor/nuclear export subunit protein 2]	.	GO:0006406;GO:0000781;GO:0000446;GO:0006283;GO:0031124;GO:0003676;GO:0006368;GO:0000445;GO:0006310	ko03040[Spliceosome]	.
scaffold00001	1253770	.	CA	C	UPSTREAM	MODIFIER	B9J08_003211	C4_05400C_B	.	hypothetical protein	PF01380.17|SIS[SIS domain]	.	GO:0030246;GO:0005975	.	.
scaffold00001	1263762	.	A	T	UPSTREAM	MODIFIER	B9J08_003214	C4_05440C_A	.	hypothetical protein	PF06101.6|DUF946[Plant protein of unknown function (DUF946)]	.	.	.	.
scaffold00001	1263801	.	TC	T	UPSTREAM	MODIFIER	B9J08_003214	C4_05440C_A	.	hypothetical protein	PF06101.6|DUF946[Plant protein of unknown function (DUF946)]	.	.	.	.
scaffold00001	1319409	.	T	TA	UPSTREAM	MODIFIER	B9J08_003240	C1_00610W_A	PSD1	phosphatidylserine decarboxylase	TIGR00163[PS_decarb: phosphatidylserine decarboxylase];PF02666.10|PS_Dcarbxylase[Phosphatidylserine decarboxylase]	EC:4.1.1.65[Phosphatidylserine decarboxylase.]	GO:0010636;GO:0010954;EC:4.1.1.65;GO:0006656;GO:0004609;GO:0031305	.	TMH:1
scaffold00001	1321777	.	A	G	UPSTREAM	MODIFIER	B9J08_003241	C1_00620W_A	MOB2	hypothetical protein	PF03637.12|Mob1_phocein[Mob1/phocein family]	.	GO:0036244;GO:0036170;GO:0035690;GO:0009267;GO:0005938;GO:0030866;GO:0030295;GO:0043332;GO:0030428;GO:0032153;GO:0036178;GO:0007118;GO:0001411;GO:0000920;GO:0007163;GO:1900445;GO:0036180;GO:0005634;GO:0051286;GO:0030448;GO:1900233;GO:0032147;GO:0031505;GO:0005934;GO:0005935;GO:2000100;GO:0044011;GO:0031579;GO:0007049	.	.
scaffold00001	1366639	.	GC	G	UPSTREAM	MODIFIER	B9J08_003264	C1_02850W_A	.	hypothetical protein	PF07647.12|SAM_2[SAM domain (Sterile alpha motif)];PF00536.25|SAM_1[SAM domain (Sterile alpha motif)]	.	GO:0003723;GO:0005634;GO:0070336;GO:0000289;GO:0005829;GO:0032079;GO:0000932	.	.
scaffold00001	1434406	.	T	C	UPSTREAM	MODIFIER	B9J08_003293	C4_01500W_A	.	cytoplasmic tRNA 2-thiolation protein 1	PF01171.15|ATP_bind_3[PP-loop family]	EC:2.7.7.-[Nucleotidyltransferases.]	GO:0032447;GO:0005524;GO:0016779;GO:0002143;GO:0000049;GO:0008360;GO:0006450;GO:0002144	.	.
scaffold00001	1450173	.	GA	G	UPSTREAM	MODIFIER	B9J08_003300	C3_01410C_A	ALI1	hypothetical protein	PF00329.14|Complex1_30kDa[Respiratory-chain NADH dehydrogenase, 30 Kd subunit]	EC:1.6.99.3[NADH dehydrogenase.];EC:1.6.5.3[NADH:ubiquinone reductase (H(+)-translocating).]	EC:1.6.5.3;GO:0005743;GO:0070469;GO:0055114;GO:0008137	ko05016[Huntington's disease];ko05010[Alzheimer's disease];ko05012[Parkinson's disease]	.
scaffold00001	1453699	.	T	C	UPSTREAM	MODIFIER	B9J08_003302	C3_00940W_A	.	hypothetical protein	PF00097.20|zf-C3HC4[Zinc finger, C3HC4 type (RING finger)];PF13639.1|zf-RING_2[Ring finger domain]	.	GO:0061630;GO:0003723;GO:0005634;GO:0071630;GO:0008270;GO:0042787;GO:0005737;GO:0000209	.	.
scaffold00001	1480615	.	TG	T	UPSTREAM	MODIFIER	B9J08_003311	C3_00960W_A	.	hypothetical protein	PF00494.14|SQS_PSY[Squalene/phytoene synthase]	.	GO:0009058;GO:0016740	.	.
scaffold00001	1574169	.	T	A	UPSTREAM	MODIFIER	B9J08_003361	CR_02860W_A	RHO1	hypothetical protein	PF08477.8|Miro[Miro-like protein];PF00025.16|Arf[ADP-ribosylation factor family];PF00071.17|Ras[Ras family]	.	GO:0043231;GO:0030036;GO:0048522;GO:0051128;GO:0030427;GO:0007264;GO:0032880;GO:0005525;GO:1903338;GO:0044444;GO:0005933	.	.
scaffold00001	1669017	.	T	G	UPSTREAM	MODIFIER	B9J08_003405	C1_01150C_A	.	hypothetical protein	PF07646.10|Kelch_2[Kelch motif];PF13418.1|Kelch_4[Galactose oxidase, central domain];PF04072.9|LCM[Leucine carboxyl methyltransferase];PF13964.1|Kelch_6[Kelch motif]	EC:2.1.1.-[Methyltransferases.]	GO:0030488;GO:0008175;GO:0031591	.	.
scaffold00001	1764296	.	T	G	UPSTREAM	MODIFIER	B9J08_003451	C2_03500W_A	.	hypothetical protein	.	.	.	.	.
scaffold00001	1777715	.	C	A	UPSTREAM	MODIFIER	B9J08_003455	C2_03530W_A	.	hypothetical protein	PF08022.7|FAD_binding_8[FAD-binding domain];PF08030.7|NAD_binding_6[Ferric reductase NAD binding domain];PF01794.14|Ferric_reduct[Ferric reductase like transmembrane component]	.	GO:0005840;GO:0097038;GO:0016021;GO:0055114;GO:0032956;GO:0016175;GO:0006915	.	TMH:7
scaffold00001	1779078	.	T	C	UPSTREAM	MODIFIER	B9J08_003455	C2_03530W_A	.	hypothetical protein	PF08022.7|FAD_binding_8[FAD-binding domain];PF08030.7|NAD_binding_6[Ferric reductase NAD binding domain];PF01794.14|Ferric_reduct[Ferric reductase like transmembrane component]	.	GO:0005840;GO:0097038;GO:0016021;GO:0055114;GO:0032956;GO:0016175;GO:0006915	.	TMH:7
scaffold00001	1797083	.	G	T	UPSTREAM	MODIFIER	B9J08_003463	C4_00140C_A	HIS4	histidinol dehydrogenase	TIGR03188[histidine_hisI: phosphoribosyl-ATP diphosphatase];PF01503.12|PRA-PH[Phosphoribosyl-ATP pyrophosphohydrolase];PF01502.13|PRA-CH[Phosphoribosyl-AMP cyclohydrolase];PF00815.15|Histidinol_dh[Histidinol dehydrogenase];TIGR00069[hisD: histidinol dehydrogenase]	EC:3.6.1.31[Phosphoribosyl-ATP diphosphatase.];EC:3.5.4.19[Phosphoribosyl-AMP cyclohydrolase.];EC:1.1.1.23[Histidinol dehydrogenase.]	GO:0005634;EC:3.6.1.31;EC:1.1.1.23;GO:0051287;GO:0055114;GO:0004635;GO:0004636;EC:3.5.4.19;GO:0005829;GO:0000105;GO:0008270;GO:0004399	.	.
scaffold00001	1801835	.	A	AT	UPSTREAM	MODIFIER	B9J08_003464	C4_00080C_A	.	hypothetical protein	PF00144.19|Beta-lactamase[Beta-lactamase]	.	.	.	.
scaffold00001	1814144	.	CTGACT	C	UPSTREAM	MODIFIER	B9J08_003468	.	.	hypothetical protein	.	.	GO:0016021	.	TMH:1
scaffold00001	1843793	.	T	A	UPSTREAM	MODIFIER	B9J08_003484	.	.	hypothetical protein	.	.	.	.	.
scaffold00001	1856367	.	T	TG	UPSTREAM	MODIFIER	B9J08_003489	CR_00980C_A	CAB3	hypothetical protein	PF02441.14|Flavoprotein[Flavoprotein]	EC:4.1.1.36[Phosphopantothenoylcysteine decarboxylase.]	GO:1990143;EC:4.1.1.36;GO:0071513;GO:0009651;GO:0015937;GO:0004633	.	.
scaffold00001	1870661	.	A	T	UPSTREAM	MODIFIER	B9J08_003498	CR_03240C_A	.	hypothetical protein	PF12171.3|zf-C2H2_jaz[Zinc-finger double-stranded RNA-binding];PF00226.26|DnaJ[DnaJ domain];PF12874.2|zf-met[Zinc-finger of C2H2 type];PF12756.2|zf-C2H2_2[C2H2 type zinc-finger (2 copies)]	.	GO:0001671;GO:0008361;GO:0000054;GO:0022625;GO:0006364;GO:0003676;GO:0032781;GO:0005730;GO:0008270;GO:0006897;GO:0005739;GO:0042273	.	.
scaffold00001	1880442	.	CA	C	UPSTREAM	MODIFIER	B9J08_003502	CR_01490C_A	.	hypothetical protein	PF03911.11|Sec61_beta[Sec61beta family]	.	GO:0006886;GO:0005784;GO:0016021	ko04145[Phagosome];ko04141[Protein processing in endoplasmic reticulum];ko05110[Vibrio cholerae infection]	TMH:1
scaffold00001	1899279	.	A	C	UPSTREAM	MODIFIER	B9J08_003511	.	.	hypothetical protein	.	.	.	.	.
scaffold00001	1963715	.	G	A	UPSTREAM	MODIFIER	B9J08_003547	C1_09880C_A	BUD31	hypothetical protein	PF01125.12|G10[G10 protein]	.	GO:0005684;GO:0000398;GO:0005686;GO:0000282	.	.
scaffold00001	1967945	.	G	A	UPSTREAM	MODIFIER	B9J08_003551	.	.	hypothetical protein	.	.	.	.	TMH:1
scaffold00001	2009705	.	A	G	UPSTREAM	MODIFIER	B9J08_003571	.	.	hypothetical protein	PF00026.18|Asp[Eukaryotic aspartyl protease]	.	EC:3.4.23;GO:0006508;GO:0004190	.	.
scaffold00001	2064152	.	GAA	G	UPSTREAM	MODIFIER	B9J08_003590	C5_02940C_A	MIG1	hypothetical protein	PF13894.1|zf-C2H2_4[C2H2-type zinc finger];PF00096.21|zf-C2H2[Zinc finger, C2H2 type];PF13465.1|zf-H2C2_2[Zinc-finger double domain]	.	GO:0046872;GO:0003677	.	.
scaffold00001	2067279	.	T	C	UPSTREAM	MODIFIER	B9J08_003590	C5_02940C_A	MIG1	hypothetical protein	PF13894.1|zf-C2H2_4[C2H2-type zinc finger];PF00096.21|zf-C2H2[Zinc finger, C2H2 type];PF13465.1|zf-H2C2_2[Zinc-finger double domain]	.	GO:0046872;GO:0003677	.	.
scaffold00001	2070940	.	T	C	UPSTREAM	MODIFIER	B9J08_003594	C4_03440C_A	DOT4	hypothetical protein	PF00443.24|UCH[Ubiquitin carboxyl-terminal hydrolase];PF13423.1|UCH_1[Ubiquitin carboxyl-terminal hydrolase]	EC:3.1.2.15[Ubiquitin thiolesterase.]	GO:0004843;GO:0000781;GO:0016578;GO:0006511;GO:0005730;GO:0006348	.	.
scaffold00001	2093757	.	T	G	UPSTREAM	MODIFIER	B9J08_003605	C1_06790C_A	MRPL19	ribosomal protein L11	TIGR01632[L11_bact: ribosomal protein L11];PF00298.14|Ribosomal_L11[Ribosomal protein L11, RNA binding domain];PF03946.9|Ribosomal_L11_N[Ribosomal protein L11, N-terminal domain]	.	GO:0005762;GO:0032543;GO:0000027;GO:0003735;GO:0019843	.	.
scaffold00001	2100570	.	C	T	UPSTREAM	MODIFIER	B9J08_003608	C1_08390C_A	.	hypothetical protein	PF00400.27|WD40[WD domain, G-beta repeat]	.	GO:0005829;GO:0005794	.	.
scaffold00001	2110639	.	GA	G	UPSTREAM	MODIFIER	B9J08_003613	C1_08340C_A	.	hypothetical protein	PF00787.19|PX[PX domain]	.	GO:0034499;GO:0005829;GO:0031902;GO:0032266;GO:0015031;GO:0000139	.	.
scaffold00001	2111187	.	G	A	UPSTREAM	MODIFIER	B9J08_003613	C1_08340C_A	.	hypothetical protein	PF00787.19|PX[PX domain]	.	GO:0034499;GO:0005829;GO:0031902;GO:0032266;GO:0015031;GO:0000139	.	.
scaffold00001	2128930	.	T	A	UPSTREAM	MODIFIER	B9J08_003619	.	.	hypothetical protein	PF05397.7|Med15_fungi[Mediator complex subunit 15]	.	GO:0001095;GO:2000219;GO:0001128;GO:0016592;GO:0000122;GO:0070847;GO:0045944;GO:0001088;GO:0001097;GO:0001102;GO:0001135;GO:0051123	.	.
scaffold00001	2132128	.	A	G	UPSTREAM	MODIFIER	B9J08_003619	.	.	hypothetical protein	PF05397.7|Med15_fungi[Mediator complex subunit 15]	.	GO:0001095;GO:2000219;GO:0001128;GO:0016592;GO:0000122;GO:0070847;GO:0045944;GO:0001088;GO:0001097;GO:0001102;GO:0001135;GO:0051123	.	.
scaffold00001	2147747	.	AGTG	A	UPSTREAM	MODIFIER	B9J08_003625	C2_04030C_A	ACP12	acyl carrier protein	TIGR00517[acyl_carrier: acyl carrier protein];PF00550.20|PP-binding[Phosphopantetheine attachment site]	EC:1.6.99.3[NADH dehydrogenase.];EC:1.6.5.3[NADH:ubiquinone reductase (H(+)-translocating).]	GO:0005739;GO:0055114;GO:0009107;GO:0016491	ko05016[Huntington's disease];ko05010[Alzheimer's disease];ko05012[Parkinson's disease]	.
scaffold00001	2162946	.	G	A	UPSTREAM	MODIFIER	B9J08_003631	C2_05470W_A	COQ5	hypothetical protein	PF08242.7|Methyltransf_12[Methyltransferase domain];PF13649.1|Methyltransf_25[Methyltransferase domain];PF08241.7|Methyltransf_11[Methyltransferase domain];PF01209.13|Ubie_methyltran[ubiE/COQ5 methyltransferase family];PF13489.1|Methyltransf_23[Methyltransferase domain];PF13847.1|Methyltransf_31[Methyltransferase domain]	EC:2.1.1.201[2-methoxy-6-polyprenyl-1,4-benzoquinol methylase.]	GO:0035690;GO:0031314;GO:0006744;GO:0032259;GO:0043334	.	.
scaffold00001	2294285	.	A	G	UPSTREAM	MODIFIER	B9J08_003706	CR_05240C_A	FGR14	hypothetical protein	PF00078.22|RVT_1[Reverse transcriptase (RNA-dependent DNA polymerase)]	.	.	.	.
scaffold00001	2298340	.	T	TA	UPSTREAM	MODIFIER	B9J08_003707	C1_05300C_A	PRD1	hypothetical protein	PF01432.15|Peptidase_M3[Peptidase family M3]	EC:3.4.24.37[Saccharolysin.]	GO:0004222;GO:0000324;GO:0005758;GO:0046872;EC:3.4.24;GO:0006508;GO:0005794;GO:0016021	.	TMH:1
scaffold00001	2306790	.	C	A	UPSTREAM	MODIFIER	B9J08_003708	C1_05290W_A	GRS1	glycine-tRNA ligase 1%2C mitochondrial	TIGR00389[glyS_dimeric: glycine--tRNA ligase];PF00587.20|tRNA-synt_2b[tRNA synthetase class II core domain (G, H, P, S and T)];PF03129.15|HGTP_anticodon[Anticodon binding domain]	EC:6.1.1.14[Glycine--tRNA ligase.]	EC:6.1.1.14;GO:0004820;GO:0005524;GO:0006426;GO:0005737	.	.
scaffold00001	2309079	.	T	C	UPSTREAM	MODIFIER	B9J08_003708	C1_05290W_A	GRS1	glycine-tRNA ligase 1%2C mitochondrial	TIGR00389[glyS_dimeric: glycine--tRNA ligase];PF00587.20|tRNA-synt_2b[tRNA synthetase class II core domain (G, H, P, S and T)];PF03129.15|HGTP_anticodon[Anticodon binding domain]	EC:6.1.1.14[Glycine--tRNA ligase.]	EC:6.1.1.14;GO:0004820;GO:0005524;GO:0006426;GO:0005737	.	.
scaffold00001	2372337	.	A	G	UPSTREAM	MODIFIER	B9J08_003735	C2_04270W_A	CAK1	hypothetical protein	PF00069.20|Pkinase[Protein kinase domain];PF07714.12|Pkinase_Tyr[Protein tyrosine kinase]	EC:2.7.11.22[Cyclin-dependent kinase.]	GO:1904031;GO:0019912;GO:0005524;EC:2.7.11;GO:0006468;GO:0000086;GO:0005737	.	.
scaffold00001	2390499	.	T	C	UPSTREAM	MODIFIER	B9J08_003745	C1_12570C_A	.	hypothetical protein	PF05625.6|PAXNEB[PAXNEB protein]	.	GO:0002098;GO:0006357;GO:0033588	.	.
scaffold00001	2423100	.	G	C	UPSTREAM	MODIFIER	B9J08_003765	C1_06680W_A	VPS34	hypothetical protein	PF00792.19|PI3K_C2[Phosphoinositide 3-kinase C2];PF00454.22|PI3_PI4_kinase[Phosphatidylinositol 3- and 4-kinase];PF00613.15|PI3Ka[Phosphoinositide 3-kinase family, accessory domain (PIK domain)]	EC:2.7.1.137[Phosphatidylinositol 3-kinase.]	GO:0034272;GO:0000329;GO:0005524;GO:0036092;GO:0030242;GO:0006468;GO:0005777;GO:0071561;GO:0046854;GO:0005768;GO:0032968;GO:0016303;GO:0034271;GO:0004672;GO:0000407;GO:0048015;EC:2.7.1.137	ko04070[Phosphatidylinositol signaling system];ko04140[Regulation of autophagy];ko04145[Phagosome]	.
scaffold00001	2423231	.	CA	C	UPSTREAM	MODIFIER	B9J08_003765	C1_06680W_A	VPS34	hypothetical protein	PF00792.19|PI3K_C2[Phosphoinositide 3-kinase C2];PF00454.22|PI3_PI4_kinase[Phosphatidylinositol 3- and 4-kinase];PF00613.15|PI3Ka[Phosphoinositide 3-kinase family, accessory domain (PIK domain)]	EC:2.7.1.137[Phosphatidylinositol 3-kinase.]	GO:0034272;GO:0000329;GO:0005524;GO:0036092;GO:0030242;GO:0006468;GO:0005777;GO:0071561;GO:0046854;GO:0005768;GO:0032968;GO:0016303;GO:0034271;GO:0004672;GO:0000407;GO:0048015;EC:2.7.1.137	ko04070[Phosphatidylinositol signaling system];ko04140[Regulation of autophagy];ko04145[Phagosome]	.
scaffold00001	2428733	.	A	T	UPSTREAM	MODIFIER	B9J08_003771	C4_06830C_A	CCT6	T-complex protein 1%2C zeta subunit	PF00118.19|Cpn60_TCP1[TCP-1/cpn60 chaperonin family];TIGR02347[chap_CCT_zeta: T-complex protein 1, zeta subunit]	.	GO:0006457;GO:0005634;GO:0005524;GO:0051082;GO:0005832	.	.
scaffold00001	2432820	.	C	G	UPSTREAM	MODIFIER	B9J08_003772	C4_06820C_A	CZF1	hypothetical protein	PF00172.13|Zn_clus[Fungal Zn(2)-Cys(6) binuclear cluster domain]	.	GO:1900189;GO:0036180;GO:0003677;GO:0000981;GO:0005634;GO:0036170;GO:0036166;GO:0009267;GO:1900241;GO:0006351;GO:1900231;GO:0006357;GO:0044011;GO:0008270;GO:0009372;GO:0009405;GO:1900443	.	.
scaffold00001	2457412	.	G	C	UPSTREAM	MODIFIER	B9J08_003776	C4_06770W_A	.	hypothetical protein	PF01545.16|Cation_efflux[Cation efflux family]	.	GO:0005783;GO:0006882;GO:0016021;GO:0005385;GO:0071577;GO:0000139	.	TMH:13
scaffold00001	2484478	.	C	G	UPSTREAM	MODIFIER	B9J08_003787	C7_03390C_A	PUP3	proteasome subunit beta type-3	PF00227.21|Proteasome[Proteasome subunit]	EC:3.4.25.1[Proteasome endopeptidase complex.]	GO:0005634;GO:0004298;GO:0010499;GO:0010950;GO:0061133;GO:0043161;GO:0005829;EC:3.4.25;GO:0019774	.	.
scaffold00001	2490649	.	A	G	UPSTREAM	MODIFIER	B9J08_003790	C7_03320C_A	MED16	hypothetical protein	PF11635.3|Med16[Mediator complex subunit 16]	.	GO:0000122;GO:0070847;GO:0045944;GO:0016592;GO:0001102;GO:0051123	.	.
scaffold00001	2494692	.	C	T	UPSTREAM	MODIFIER	B9J08_003790	C7_03320C_A	MED16	hypothetical protein	PF11635.3|Med16[Mediator complex subunit 16]	.	GO:0000122;GO:0070847;GO:0045944;GO:0016592;GO:0001102;GO:0051123	.	.
scaffold00001	2495539	.	A	T	UPSTREAM	MODIFIER	B9J08_003791	C7_03330C_A	SHM1	serine hydroxymethyltransferase%2C mitochondrial	PF00464.14|SHMT[Serine hydroxymethyltransferase]	EC:2.1.2.1[Glycine hydroxymethyltransferase.]	GO:0008168;GO:0006563;GO:0004372;EC:2.1.2.1;GO:0006544;GO:0035999;GO:0005739;GO:0030170;GO:0009070;GO:0032259	ko00670[One carbon pool by folate];ko00460[Cyanoamino acid metabolism];ko00680[Methane metabolism]	.
scaffold00001	2497412	.	A	G	UPSTREAM	MODIFIER	B9J08_003791	C7_03330C_A	SHM1	serine hydroxymethyltransferase%2C mitochondrial	PF00464.14|SHMT[Serine hydroxymethyltransferase]	EC:2.1.2.1[Glycine hydroxymethyltransferase.]	GO:0008168;GO:0006563;GO:0004372;EC:2.1.2.1;GO:0006544;GO:0035999;GO:0005739;GO:0030170;GO:0009070;GO:0032259	ko00670[One carbon pool by folate];ko00460[Cyanoamino acid metabolism];ko00680[Methane metabolism]	.
scaffold00001	2504279	.	A	AT	UPSTREAM	MODIFIER	B9J08_003796	C7_03490W_A	GYP7	hypothetical protein	PF00566.13|RabGAP-TBC[Rab-GTPase-TBC domain]	.	GO:0005634;GO:0005829;GO:0032889;GO:0016192	.	.
scaffold00001	2528431	.	G	T	UPSTREAM	MODIFIER	B9J08_003802	C2_10090C_A	.	hypothetical protein	PF13041.1|PPR_2[PPR repeat family]	.	GO:0005739	.	.
scaffold00001	2529453	.	C	T	UPSTREAM	MODIFIER	B9J08_003802	C2_10090C_A	.	hypothetical protein	PF13041.1|PPR_2[PPR repeat family]	.	GO:0005739	.	.
scaffold00001	2532809	.	T	C	UPSTREAM	MODIFIER	B9J08_003805	C2_09600C_A	.	hypothetical protein	PF05907.8|DUF866[Eukaryotic protein of unknown function (DUF866)]	.	GO:0005634;GO:0097311;GO:0005737	.	.
scaffold00001	2541581	.	G	A	UPSTREAM	MODIFIER	B9J08_003808	C2_09990C_A	YOR1	hypothetical protein	PF00005.22|ABC_tran[ABC transporter];PF00664.18|ABC_membrane[ABC transporter transmembrane region];PF13304.1|AAA_21[AAA domain]	.	EC:3.6.3.44;GO:0005524;GO:0016021;GO:0008559;GO:0042908;GO:0006855	.	TMH:10
scaffold00001	2598567	.	A	G	UPSTREAM	MODIFIER	B9J08_003836	C6_04580W_A	HXK1	hypothetical protein	PF03727.11|Hexokinase_2[Hexokinase];PF00349.16|Hexokinase_1[Hexokinase]	EC:2.7.1.1[Hexokinase.]	GO:0005524;GO:0006096;GO:0005536;GO:0046835;GO:0001678;GO:0005623;EC:2.7.1.1;GO:0004396	ko00052[Galactose metabolism];ko00500[Starch and sucrose metabolism];ko00520[Amino sugar and nucleotide sugar metabolism];ko00051[Fructose and mannose metabolism];ko04930[Type II diabetes mellitus];ko00521[Streptomycin biosynthesis];ko04910[Insulin signaling pathway];ko04973[Carbohydrate digestion and absorption];ko00524[Butirosin and neomycin biosynthesis]	.
scaffold00001	2688003	.	G	A	UPSTREAM	MODIFIER	B9J08_003876	C1_05050C_A	RRP6	hypothetical protein	PF00570.18|HRDC[HRDC domain];PF08066.7|PMC2NT[PMC2NT (NUC016) domain];PF01612.15|DNA_pol_A_exo1[3'-5' exonuclease]	EC:3.1.13.-[Exoribonucleases producing 5'-phosphomonoesters.];EC:3.1.26.3[Ribonuclease III.]	GO:0071046;GO:0000176;GO:0033621;GO:0003676;GO:0016073;GO:0008408;GO:0005730;GO:0000166;GO:0090305;GO:1990251;GO:0043628	.	.
scaffold00001	2706143	.	A	T	UPSTREAM	MODIFIER	B9J08_003882	C1_05110C_A	ARO4	phospho-2-dehydro-3-deoxyheptonate aldolase%2C tyrosine-inhibited	TIGR00034[aroFGH: 3-deoxy-7-phosphoheptulonate synthase];PF00793.15|DAHP_synth_1[DAHP synthetase I family]	EC:2.5.1.54[3-deoxy-7-phosphoheptulonate synthase.]	EC:2.5.1.54;GO:0009423;GO:0005634;GO:0003849;GO:0009073;GO:0005737	.	.
scaffold00001	2811042	.	G	C	UPSTREAM	MODIFIER	B9J08_003930	C1_12280C_A	.	hypothetical protein	PF10501.4|Ribosomal_L50[Ribosomal subunit 39S]	.	GO:0005739	.	.
scaffold00001	2916588	.	C	T	UPSTREAM	MODIFIER	B9J08_003977	C5_05280C_A	SDH4	hypothetical protein	PF05328.7|CybS[CybS]	.	EC:1.3.99.1;GO:0006970;GO:0055114;GO:0006915;GO:0000104;GO:0034599;GO:0016021;GO:0046685;GO:0042721;GO:0045039	ko05016[Huntington's disease];ko00190[Oxidative phosphorylation];ko05010[Alzheimer's disease];ko05012[Parkinson's disease]	TMH:2
scaffold00001	2916652	.	A	T	UPSTREAM	MODIFIER	B9J08_003977	C5_05280C_A	SDH4	hypothetical protein	PF05328.7|CybS[CybS]	.	EC:1.3.99.1;GO:0006970;GO:0055114;GO:0006915;GO:0000104;GO:0034599;GO:0016021;GO:0046685;GO:0042721;GO:0045039	ko05016[Huntington's disease];ko00190[Oxidative phosphorylation];ko05010[Alzheimer's disease];ko05012[Parkinson's disease]	TMH:2
scaffold00001	2936771	.	T	A	UPSTREAM	MODIFIER	B9J08_003986	CR_06520C_A	.	hypothetical protein	PF09439.5|SRPRB[Signal recognition particle receptor beta subunit];PF08477.8|Miro[Miro-like protein];PF00025.16|Arf[ADP-ribosylation factor family];PF00071.17|Ras[Ras family]	.	GO:0007264;GO:0005829;GO:0005794;GO:0042147;GO:0005525;GO:0005801;GO:0003924	.	.
scaffold00001	2948167	.	A	T	UPSTREAM	MODIFIER	B9J08_003991	CR_06490C_A	HSP60	heat shock protein 60%2C mitochondrial	PF00118.19|Cpn60_TCP1[TCP-1/cpn60 chaperonin family];TIGR02348[GroEL: chaperonin GroL]	.	GO:0003688;GO:0005524;GO:0042645;EC:3.6.1.3;GO:0051087;GO:0003697;GO:0045041;GO:0016887;GO:0006458;GO:0005758;GO:0034605;GO:0051131;GO:0051082;GO:0051604;GO:0031966;GO:0042026;GO:0050821	ko04940[Type I diabetes mellitus]	.
scaffold00001	2964279	.	C	T	UPSTREAM	MODIFIER	B9J08_003999	C2_10340W_A	HEM4	hypothetical protein	PF02602.10|HEM4[Uroporphyrinogen-III synthase HemD]	EC:4.2.1.75[Uroporphyrinogen-III synthase.]	EC:4.2.1.75;GO:0005634;GO:0005829;GO:0033014;GO:0004852	.	.
scaffold00001	2968733	.	T	G	UPSTREAM	MODIFIER	B9J08_004002	C2_10300C_A	.	hypothetical protein	.	.	.	.	.
scaffold00001	3012666	.	T	A	UPSTREAM	MODIFIER	B9J08_004021	.	.	hypothetical protein	PF00328.17|His_Phos_2[Histidine phosphatase superfamily (branch 2)]	EC:3.1.3.2[Acid phosphatase.]	GO:0003993;GO:0016311;EC:3.1.3.2	ko00740[Riboflavin metabolism]	.
scaffold00001	3022409	.	G	C	UPSTREAM	MODIFIER	B9J08_004027	C1_10150W_A	WOR1	hypothetical protein	PF09729.4|Gti1_Pac2[Gti1/Pac2 family]	.	GO:0005634;GO:0005829;GO:0035432	.	.
scaffold00001	3023079	.	G	T	UPSTREAM	MODIFIER	B9J08_004027	C1_10150W_A	WOR1	hypothetical protein	PF09729.4|Gti1_Pac2[Gti1/Pac2 family]	.	GO:0005634;GO:0005829;GO:0035432	.	.
scaffold00001	3024532	.	GT	G	UPSTREAM	MODIFIER	B9J08_004027	C1_10150W_A	WOR1	hypothetical protein	PF09729.4|Gti1_Pac2[Gti1/Pac2 family]	.	GO:0005634;GO:0005829;GO:0035432	.	.
scaffold00001	3024893	.	C	T	UPSTREAM	MODIFIER	B9J08_004027	C1_10150W_A	WOR1	hypothetical protein	PF09729.4|Gti1_Pac2[Gti1/Pac2 family]	.	GO:0005634;GO:0005829;GO:0035432	.	.
scaffold00001	3064944	.	G	A	UPSTREAM	MODIFIER	B9J08_004042	C1_09990W_A	SAC1	hypothetical protein	PF02383.13|Syja_N[SacI homology domain]	.	GO:0035339;GO:0036092;GO:0004438;GO:0005797;GO:0043812;EC:3.1.3.64;GO:0030173;GO:0030176;GO:0043813;GO:0046856	.	TMH:1
scaffold00001	3069722	.	G	A	UPSTREAM	MODIFIER	B9J08_004044	.	.	hypothetical protein	PF08661.6|Rep_fac-A_3[Replication factor A protein 3]	.	GO:0003677;GO:0005634;GO:0006281;GO:0006260;GO:0006310	ko03430[Mismatch repair];ko03440[Homologous recombination];ko03420[Nucleotide excision repair]	.
scaffold00001	3106436	.	G	A	UPSTREAM	MODIFIER	B9J08_004067	C5_03070W_A	RPS5	40S ribosomal protein S5	PF00177.16|Ribosomal_S7[Ribosomal protein S7p/S5e];TIGR01028[S7_S5_E_A: ribosomal protein S7]	.	GO:0016020;GO:0003723;GO:0006407;GO:0006412;GO:0003735;GO:0022627	.	.
scaffold00001	3141293	.	T	TC	UPSTREAM	MODIFIER	B9J08_004086	CR_02680W_A	.	hypothetical protein	PF03801.8|Ndc80_HEC[HEC/Ndc80p family]	.	GO:0034501;GO:0007059;GO:0042802;GO:0000778;GO:0005200;GO:0031262;GO:0007020	.	.
scaffold00001	3141294	.	T	TCC	UPSTREAM	MODIFIER	B9J08_004086	CR_02680W_A	.	hypothetical protein	PF03801.8|Ndc80_HEC[HEC/Ndc80p family]	.	GO:0034501;GO:0007059;GO:0042802;GO:0000778;GO:0005200;GO:0031262;GO:0007020	.	.
scaffold00001	3149051	.	T	TG	UPSTREAM	MODIFIER	B9J08_004089	CR_02640W_A	RFG1	hypothetical protein	PF00505.14|HMG_box[HMG (high mobility group) box];PF09011.5|HMG_box_2[HMG-box domain]	.	GO:0097201;GO:0000987;GO:0008301;GO:0001135;GO:0006366;GO:0001078	.	.
scaffold00001	3152979	.	C	A	UPSTREAM	MODIFIER	B9J08_004089	CR_02640W_A	RFG1	hypothetical protein	PF00505.14|HMG_box[HMG (high mobility group) box];PF09011.5|HMG_box_2[HMG-box domain]	.	GO:0097201;GO:0000987;GO:0008301;GO:0001135;GO:0006366;GO:0001078	.	.
scaffold00001	3181144	.	A	T	UPSTREAM	MODIFIER	B9J08_004098	C7_03290C_A	RBR3	hypothetical protein	PF11765.3|Hyphal_reg_CWP[Hyphally regulated cell wall protein N-terminal]	.	.	.	.
scaffold00001	3187808	.	C	CAATGGTGGCCAACCAACTGGACCTGGT	UPSTREAM	MODIFIER	B9J08_004101	.	.	hypothetical protein	.	.	GO:0016021	.	TMH:8
scaffold00001	3187842	.	G	GGACA	UPSTREAM	MODIFIER	B9J08_004101	.	.	hypothetical protein	.	.	GO:0016021	.	TMH:8
scaffold00007	8654	.	T	A	UPSTREAM	MODIFIER	B9J08_004104	.	.	hypothetical protein	PF00085.15|Thioredoxin[Thioredoxin]	.	.	.	.
scaffold00007	8662	.	A	G	UPSTREAM	MODIFIER	B9J08_004104	.	.	hypothetical protein	PF00085.15|Thioredoxin[Thioredoxin]	.	.	.	.
scaffold00007	8701	.	CTTTTTATT	C	UPSTREAM	MODIFIER	B9J08_004104	.	.	hypothetical protein	PF00085.15|Thioredoxin[Thioredoxin]	.	.	.	.
scaffold00007	47934	.	C	A	UPSTREAM	MODIFIER	B9J08_004112	C6_04130C_A	ALS4	hypothetical protein	PF11766.3|Candida_ALS_N[Cell-wall agglutinin N-terminal ligand-sugar binding];PF05792.8|Candida_ALS[Candida agglutinin-like (ALS)]	.	.	.	.
scaffold00007	51521	.	C	A	UPSTREAM	MODIFIER	B9J08_004112	C6_04130C_A	ALS4	hypothetical protein	PF11766.3|Candida_ALS_N[Cell-wall agglutinin N-terminal ligand-sugar binding];PF05792.8|Candida_ALS[Candida agglutinin-like (ALS)]	.	.	.	.
scaffold00007	58612	.	A	G	UPSTREAM	MODIFIER	B9J08_004114	.	.	hypothetical protein	PF08659.5|KR[KR domain];PF13561.1|adh_short_C2[Enoyl-(Acyl carrier protein) reductase];PF00106.20|adh_short[short chain dehydrogenase]	EC:1.1.1.303[Diacetyl reductase ((R)-acetoin forming).];EC:1.1.1.4[(R,R)-butanediol dehydrogenase.]	.	.	.
scaffold00007	76557	.	A	G	UPSTREAM	MODIFIER	B9J08_004123	CR_10590W_A	.	hypothetical protein	.	.	GO:0006623;GO:0000011;GO:0007035;GO:0033263	.	.
scaffold00007	80265	.	C	CT	UPSTREAM	MODIFIER	B9J08_004124	CR_10580W_A	PRO1	glutamate 5-kinase	TIGR01027[proB: glutamate 5-kinase];PF00696.23|AA_kinase[Amino acid kinase family];PF01472.15|PUA[PUA domain]	EC:2.7.2.11[Glutamate 5-kinase.]	GO:0006561;GO:0016310;GO:0003723;EC:2.7.2.11;GO:0004349;GO:0005737	.	.
scaffold00007	143473	.	T	C	UPSTREAM	MODIFIER	B9J08_004144	C1_13020C_A	SPC3	hypothetical protein	PF04573.7|SPC22[Signal peptidase subunit]	EC:3.4.-.-[Acting on peptide bonds (peptide hydrolases).]	GO:0045047;GO:0008233;GO:0031090;GO:0016021;GO:0006465;GO:0005787	.	TMH:1
scaffold00007	172071	.	T	C	UPSTREAM	MODIFIER	B9J08_004153	C1_00340W_A	HBR1	hypothetical protein	PF13207.1|AAA_17[AAA domain];PF13238.1|AAA_18[AAA domain]	EC:2.7.4.3[Adenylate kinase.]	GO:0000462;GO:0005634;GO:0036166;GO:0005524;GO:0006355;EC:3.6.1.3;GO:0006351;GO:0004017;GO:0005737;GO:0046939;GO:0034599;EC:2.7.4.3;GO:0016887	ko03022[Basal transcription factors]	.
scaffold00007	187008	.	C	T	UPSTREAM	MODIFIER	B9J08_004160	C7_01690W_A	.	hypothetical protein	PF05495.7|zf-CHY[CHY zinc finger]	.	GO:0005634;GO:0005829;GO:0008270;GO:0005758;GO:0045041	.	.
scaffold00007	205308	.	C	T	UPSTREAM	MODIFIER	B9J08_004167	CR_02510W_A	.	hypothetical protein	PF13894.1|zf-C2H2_4[C2H2-type zinc finger];PF00096.21|zf-C2H2[Zinc finger, C2H2 type];PF12874.2|zf-met[Zinc-finger of C2H2 type];PF13465.1|zf-H2C2_2[Zinc-finger double domain]	.	GO:0000978;GO:0005634;GO:0001077;GO:0006366;GO:0071322;GO:0046872;GO:0060237;GO:0005829;GO:0045944	.	.
scaffold00007	210308	.	C	G	UPSTREAM	MODIFIER	B9J08_004171	.	.	hypothetical protein	PF00010.21|HLH[Helix-loop-helix DNA-binding domain]	.	GO:0030447;GO:0006351;GO:0000790;GO:0045893;GO:0046983;GO:0045821;GO:0070887;GO:0003700;GO:0051704	.	.
scaffold00007	211676	.	G	T	UPSTREAM	MODIFIER	B9J08_004171	.	.	hypothetical protein	PF00010.21|HLH[Helix-loop-helix DNA-binding domain]	.	GO:0030447;GO:0006351;GO:0000790;GO:0045893;GO:0046983;GO:0045821;GO:0070887;GO:0003700;GO:0051704	.	.
scaffold00007	219779	.	C	T	UPSTREAM	MODIFIER	B9J08_004175	C1_09420W_A	LIP2	hypothetical protein	PF03583.9|LIP[Secretory lipase]	.	EC:3.1.1.3;GO:0016042;GO:0004806;GO:0016021	.	.
scaffold00007	245722	.	C	T	UPSTREAM	MODIFIER	B9J08_004184	.	.	hypothetical protein	PF02891.15|zf-MIZ[MIZ/SP-RING zinc finger]	.	GO:0008270	.	.
scaffold00007	423735	.	A	G	UPSTREAM	MODIFIER	B9J08_004264	CR_07730W_A	HGT14	hypothetical protein	PF07690.11|MFS_1[Major Facilitator Superfamily];PF00083.19|Sugar_tr[Sugar (and other) transporter]	.	GO:0055085;GO:0008643;GO:0016021;GO:0022857	.	TMH:12
scaffold00007	434265	.	GA	G	UPSTREAM	MODIFIER	B9J08_004268	C2_03550C_A	.	hypothetical protein	PF02854.14|MIF4G[MIF4G domain];PF04050.9|Upf2[Up-frameshift suppressor 2]	.	GO:0003723;GO:0070478;GO:0005829;GO:0006310;GO:0005844	ko03015[mRNA surveillance pathway]	.
scaffold00007	486610	.	A	AT	UPSTREAM	MODIFIER	B9J08_004294	C5_04670W_A	SRP101	hypothetical protein	PF02881.14|SRP54_N[SRP54-type protein, helical bundle domain];PF03308.11|ArgK[ArgK protein];PF04086.8|SRP-alpha_N[Signal recognition particle, alpha subunit, N-terminal];PF00448.17|SRP54[SRP54-type protein, GTPase domain];PF01656.18|CbiA[CobQ/CobB/MinD/ParA nucleotide binding domain]	.	GO:0006614;GO:0005525;GO:0005047;GO:0003924;GO:0005785	.	.
scaffold00007	487428	.	C	T	UPSTREAM	MODIFIER	B9J08_004294	C5_04670W_A	SRP101	hypothetical protein	PF02881.14|SRP54_N[SRP54-type protein, helical bundle domain];PF03308.11|ArgK[ArgK protein];PF04086.8|SRP-alpha_N[Signal recognition particle, alpha subunit, N-terminal];PF00448.17|SRP54[SRP54-type protein, GTPase domain];PF01656.18|CbiA[CobQ/CobB/MinD/ParA nucleotide binding domain]	.	GO:0006614;GO:0005525;GO:0005047;GO:0003924;GO:0005785	.	.
scaffold00007	504279	.	T	C	UPSTREAM	MODIFIER	B9J08_004299	C5_04720C_A	.	GTP cyclohydrolase 1	TIGR00063[folE: GTP cyclohydrolase I];PF01227.17|GTP_cyclohydroI[GTP cyclohydrolase I]	EC:3.5.4.16[GTP cyclohydrolase I.]	EC:3.5.4.16;GO:0005634;GO:0046654;GO:0003934;GO:0005737	.	.
scaffold00007	534350	.	T	C	UPSTREAM	MODIFIER	B9J08_004314	.	.	hypothetical protein	.	.	GO:0016021	.	TMH:1
scaffold00007	541003	.	G	A	UPSTREAM	MODIFIER	B9J08_004311	.	.	hypothetical protein	PF10863.3|DUF2702[Protein of unknown function (DUF2702)]	.	GO:0030686;GO:0042274	.	.
scaffold00007	547822	.	T	C	UPSTREAM	MODIFIER	B9J08_004317	C5_04880C_A	PUT2	1-pyrroline-5-carboxylate dehydrogenase	TIGR01236[D1pyr5carbox1: 1-pyrroline-5-carboxylate dehydrogenase];PF00171.17|Aldedh[Aldehyde dehydrogenase family]	EC:1.5.1.12[1-pyrroline-5-carboxylate dehydrogenase.]	GO:0006561;GO:0005759;EC:1.5.1.12;GO:0006537;GO:0055114;EC:1.2.1.3;GO:0005829;GO:0010133;GO:0003842;GO:0004029	ko00330[Arginine and proline metabolism]	.
scaffold00007	551934	.	A	C	UPSTREAM	MODIFIER	B9J08_004317	C5_04880C_A	PUT2	1-pyrroline-5-carboxylate dehydrogenase	TIGR01236[D1pyr5carbox1: 1-pyrroline-5-carboxylate dehydrogenase];PF00171.17|Aldedh[Aldehyde dehydrogenase family]	EC:1.5.1.12[1-pyrroline-5-carboxylate dehydrogenase.]	GO:0006561;GO:0005759;EC:1.5.1.12;GO:0006537;GO:0055114;EC:1.2.1.3;GO:0005829;GO:0010133;GO:0003842;GO:0004029	ko00330[Arginine and proline metabolism]	.
scaffold00007	572779	.	G	C	UPSTREAM	MODIFIER	B9J08_004326	C5_05000C_A	.	hypothetical protein	PF01764.20|Lipase_3[Lipase (class 3)];PF05057.9|DUF676[Putative serine esterase (DUF676)]	.	.	.	.
scaffold00007	580253	.	A	G	UPSTREAM	MODIFIER	B9J08_004332	.	.	hypothetical protein	PF08614.6|ATG16[Autophagy protein 16 (ATG16)]	.	GO:0016020	.	.
scaffold00007	595255	.	T	G	UPSTREAM	MODIFIER	B9J08_004337	C5_05110C_A	TIP20	hypothetical protein	PF04437.8|RINT1_TIP1[RINT-1 / TIP-1 family]	.	GO:0048193;GO:0005783;GO:0005634;GO:0005829;GO:0000724	.	.
scaffold00007	612092	.	T	C	UPSTREAM	MODIFIER	B9J08_004344	C4_03110W_B	.	hypothetical protein	PF13246.1|Hydrolase_like2[Putative hydrolase of sodium-potassium ATPase alpha subunit];PF00702.21|Hydrolase[haloacid dehalogenase-like hydrolase];PF12710.2|HAD[haloacid dehalogenase-like hydrolase];PF00122.15|E1-E2_ATPase[E1-E2 ATPase]	.	GO:0000287;EC:3.6.3.1;GO:0045332;GO:0005524;GO:0016021;GO:0004012	.	TMH:7
scaffold00007	640046	.	C	A	UPSTREAM	MODIFIER	B9J08_004356	C5_04290C_A	.	hypothetical protein	PF01652.13|IF4E[Eukaryotic initiation factor 4E]	.	GO:0006413;GO:0003743;GO:0005737	.	.
scaffold00007	676572	.	T	C	UPSTREAM	MODIFIER	B9J08_004377	C2_03260W_A	.	hypothetical protein	PF06201.8|PITH[PITH domain]	.	.	.	.
scaffold00007	756358	.	G	A	UPSTREAM	MODIFIER	B9J08_004407	C4_00560C_A	MMM1	hypothetical protein	PF10296.4|DUF2404[Putative integral membrane protein conserved region (DUF2404)]	.	GO:1990456;GO:0045040;GO:0032865;GO:0070096;GO:0015914;GO:0030176;GO:0000002	.	TMH:1
scaffold00007	780109	.	T	G	UPSTREAM	MODIFIER	B9J08_004423	C4_00770C_A	.	translation machinery-associated protein 22	PF01253.17|SUI1[Translation initiation factor SUI1]	.	GO:0006413;GO:0005840;GO:0003743;GO:0005739	.	.
scaffold00007	792684	.	AAG	A	UPSTREAM	MODIFIER	B9J08_004429	C3_03230C_A	.	hypothetical protein	PF00324.16|AA_permease[Amino acid permease];PF13520.1|AA_permease_2[Amino acid permease]	.	GO:0044690;GO:0015191;GO:1902475;GO:0016021	.	TMH:10
scaffold00007	847429	.	G	C	UPSTREAM	MODIFIER	B9J08_004449	.	.	hypothetical protein	.	.	.	.	.
scaffold00007	889235	.	G	GAGT	UPSTREAM	MODIFIER	B9J08_004466	C4_03540C_A	ECM38	gamma-glutamyltransferase	PF01019.16|G_glu_transpept[Gamma-glutamyltranspeptidase]	EC:2.3.2.2[Gamma-glutamyltransferase.]	GO:0006749	ko00480[Glutathione metabolism];ko00590[Arachidonic acid metabolism];ko00460[Cyanoamino acid metabolism]	.
scaffold00006	13630	.	G	A	UPSTREAM	MODIFIER	B9J08_004471	.	.	hypothetical protein	.	.	.	.	.
scaffold00006	75560	.	A	G	UPSTREAM	MODIFIER	B9J08_004495	C1_04990C_A	.	hypothetical protein	PF00642.19|zf-CCCH[Zinc finger C-x8-C-x5-C-x3-H type (and similar)]	.	GO:0046872;GO:0003723;GO:0071004;GO:0089701;GO:0000166;GO:0005829;GO:0045292;GO:0000243	ko05131[Shigellosis]	.
scaffold00006	76529	.	A	C	UPSTREAM	MODIFIER	B9J08_004495	C1_04990C_A	.	hypothetical protein	PF00642.19|zf-CCCH[Zinc finger C-x8-C-x5-C-x3-H type (and similar)]	.	GO:0046872;GO:0003723;GO:0071004;GO:0089701;GO:0000166;GO:0005829;GO:0045292;GO:0000243	ko05131[Shigellosis]	.
scaffold00006	80873	.	G	A	UPSTREAM	MODIFIER	B9J08_004499	CR_09120C_A	TUB1	tubulin alpha chain	PF03953.12|Tubulin_C[Tubulin C-terminal domain];PF00091.20|Tubulin[Tubulin/FtsZ family, GTPase domain]	.	GO:0005874;GO:0007017;GO:0005525;GO:0005200;GO:0005737;GO:0003924	ko05130[Pathogenic Escherichia coli infection];ko04540[Gap junction]	.
scaffold00006	122395	.	TATGCAC	T	UPSTREAM	MODIFIER	B9J08_004521	C1_05380C_A	.	hypothetical protein	PF12231.3|Rif1_N[Rap1-interacting factor 1 N terminal]	.	GO:0009987	.	.
scaffold00006	193116	.	G	A	UPSTREAM	MODIFIER	B9J08_004547	C1_09000W_A	.	hypothetical protein	PF10355.4|Ytp1[Protein of unknown function (Ytp1)]	.	GO:0016021	.	TMH:7
scaffold00006	278146	.	A	G	UPSTREAM	MODIFIER	B9J08_004579	C1_08380W_A	TEF2	elongation factor 1-alpha 2	TIGR00483[EF-1_alpha: translation elongation factor EF-1, subunit alpha];PF03143.12|GTP_EFTU_D3[Elongation factor Tu C-terminal domain];PF00009.22|GTP_EFTU[Elongation factor Tu GTP binding domain];PF03144.20|GTP_EFTU_D2[Elongation factor Tu domain 2]	.	GO:0003746;GO:0006414;GO:0005737;GO:0003924;GO:0030446;GO:0009986;GO:0030445;GO:0005515;GO:0051701;GO:0005525	.	.
scaffold00006	285838	.	T	G	UPSTREAM	MODIFIER	B9J08_004581	C2_06910W_A	YPT72	hypothetical protein	PF01926.18|MMR_HSR1[50S ribosome-binding GTPase];PF08477.8|Miro[Miro-like protein];PF00009.22|GTP_EFTU[Elongation factor Tu GTP binding domain];PF04670.7|Gtr1_RagA[Gtr1/RagA G protein conserved region];PF00025.16|Arf[ADP-ribosylation factor family];PF00071.17|Ras[Ras family]	.	GO:0061191;GO:0030100;GO:0005741;GO:0007035;GO:0005829;GO:0007264;GO:0000011;GO:0006897;GO:0036187;GO:0072665;GO:0000329;GO:0036180;GO:0042147;GO:0042144;GO:0003924;GO:0034727;GO:0005525;GO:0009405	ko05146[Amoebiasis];ko04145[Phagosome]	.
scaffold00006	294585	.	C	A	UPSTREAM	MODIFIER	B9J08_004585	C2_08630C_A	.	hypothetical protein	PF03985.8|Paf1[Paf1]	.	GO:2001255;GO:0090262;GO:0031124;GO:0016570;GO:0006368;GO:0000122;GO:0006362;GO:0032968;GO:0000083;GO:0005829;GO:0003682;GO:0000183;GO:0001015;GO:0006353;GO:0034401;GO:0051569;GO:1990269;GO:0016593;GO:0035327;GO:2001173;GO:0070911;GO:0000983;GO:0006364;GO:0045910;GO:0031938;GO:0031126;GO:2001209;GO:2001165;GO:0001089	.	.
scaffold00006	327344	.	A	G	UPSTREAM	MODIFIER	B9J08_004602	CR_02020C_A	OPT1	OPT family small oligopeptide transporter	PF03169.10|OPT[OPT oligopeptide transporter protein];TIGR00727[ISP4_OPT: small oligopeptide transporter, OPT family]	.	GO:0005783;GO:0005794;GO:0016021;GO:1901584;GO:0005886;GO:1901583	.	TMH:14
scaffold00006	357787	.	G	GATTC	UPSTREAM	MODIFIER	B9J08_004612	C4_05190C_A	EDC3	hypothetical protein	PF09532.5|FDF[FDF domain];PF03853.10|YjeF_N[YjeF-related protein N-terminus]	.	GO:0010494;GO:0034063;GO:0003729;GO:0005634;GO:0036170;GO:0009267;GO:0031087;GO:1900153;GO:0000932;GO:0033962	.	.
scaffold00006	368658	.	A	G	UPSTREAM	MODIFIER	B9J08_004619	C1_01860W_A	.	transcription elongation factor S-II	PF01096.13|TFIIS_C[Transcription factor S-II (TFIIS)];PF07500.9|TFIIS_M[Transcription factor S-II (TFIIS), central domain];PF08711.6|Med26[TFIIS helical bundle-like domain];TIGR01385[TFSII: transcription elongation factor S-II]	.	GO:0032784;GO:0006357;GO:0003677;GO:0005634;GO:0008270;GO:0003746;GO:0006414;GO:0006351	.	.
scaffold00006	391677	.	A	T	UPSTREAM	MODIFIER	B9J08_004628	.	.	hypothetical protein	.	.	.	.	.
scaffold00006	399106	.	T	A	UPSTREAM	MODIFIER	B9J08_004633	C1_13400C_A	AGC1	hypothetical protein	PF00153.22|Mito_carr[Mitochondrial carrier protein]	.	GO:0055085;GO:0016021;GO:0005886	.	.
scaffold00006	458839	.	G	A	UPSTREAM	MODIFIER	B9J08_004656	CR_08920W_A	.	hypothetical protein	PF08028.6|Acyl-CoA_dh_2[Acyl-CoA dehydrogenase, C-terminal domain];PF02770.14|Acyl-CoA_dh_M[Acyl-CoA dehydrogenase, middle domain];PF02771.11|Acyl-CoA_dh_N[Acyl-CoA dehydrogenase, N-terminal domain];PF00441.19|Acyl-CoA_dh_1[Acyl-CoA dehydrogenase, C-terminal domain]	EC:1.3.99.3[Acyl-CoA dehydrogenase.];EC:1.3.99.2[Transferred entry: 1.3.8.1.]	GO:0004085;EC:1.3.99.3;EC:1.3.8.1;GO:0050660;GO:0003995;GO:0055114	ko00640[Propanoate metabolism];ko00280[Valine, leucine and isoleucine degradation];ko00410[beta-Alanine metabolism];ko03320[PPAR signaling pathway]	.
scaffold00006	470053	.	C	T	UPSTREAM	MODIFIER	B9J08_004660	.	.	hypothetical protein	.	.	.	.	.
scaffold00006	521990	.	T	C	UPSTREAM	MODIFIER	B9J08_004688	.	.	hypothetical protein	.	.	.	.	.
scaffold00006	525635	.	C	T	UPSTREAM	MODIFIER	B9J08_004688	.	.	hypothetical protein	.	.	.	.	.
scaffold00006	534324	.	T	G	UPSTREAM	MODIFIER	B9J08_004693	C5_03580C_A	CAC2	hypothetical protein	PF00400.27|WD40[WD domain, G-beta repeat]	.	GO:0006335;GO:0042393;GO:0005634;GO:0005829;GO:0000775;GO:0033186	.	.
scaffold00006	537706	.	T	C	UPSTREAM	MODIFIER	B9J08_004693	C5_03580C_A	CAC2	hypothetical protein	PF00400.27|WD40[WD domain, G-beta repeat]	.	GO:0006335;GO:0042393;GO:0005634;GO:0005829;GO:0000775;GO:0033186	.	.
scaffold00006	558283	.	T	C	UPSTREAM	MODIFIER	B9J08_004707	C4_03290W_B	.	hypothetical protein	PF00867.13|XPG_I[XPG I-region];PF12247.3|MKT1_N[Temperature dependent protein affecting M2 dsRNA replication];PF12246.3|MKT1_C[Temperature dependent protein affecting M2 dsRNA replication];PF00752.12|XPG_N[XPG N-terminal domain]	.	GO:0005634;GO:0006281;GO:0045727;GO:0000932;GO:0004518;GO:0005829;GO:0044419;GO:0090305;GO:0005844	.	.
scaffold00006	590768	.	T	A	UPSTREAM	MODIFIER	B9J08_004722	C1_11890W_A	.	hypothetical protein	.	.	GO:0005634;GO:0005829;GO:0005739	.	.
scaffold00006	635072	.	C	CTAT	UPSTREAM	MODIFIER	B9J08_004743	C4_04930C_A	.	hypothetical protein	PF00226.26|DnaJ[DnaJ domain]	.	.	.	.
scaffold00006	641500	.	A	T	UPSTREAM	MODIFIER	B9J08_004749	C3_07020W_A	SSN6	hypothetical protein	PF13371.1|TPR_9[Tetratricopeptide repeat];PF13428.1|TPR_14[Tetratricopeptide repeat];PF00515.23|TPR_1[Tetratricopeptide repeat];PF13181.1|TPR_8[Tetratricopeptide repeat];PF13432.1|TPR_16[Tetratricopeptide repeat];PF13414.1|TPR_11[TPR repeat];PF13174.1|TPR_6[Tetratricopeptide repeat];PF07719.12|TPR_2[Tetratricopeptide repeat]	.	GO:0005634;GO:0007070;GO:0006338;GO:0042826;GO:2001020;GO:0035955;GO:0016584;GO:0006366;GO:0001190;GO:0017053;GO:0003713;GO:0045944;GO:2000531;GO:0001191	.	.
scaffold00006	641761	.	T	C	UPSTREAM	MODIFIER	B9J08_004749	C3_07020W_A	SSN6	hypothetical protein	PF13371.1|TPR_9[Tetratricopeptide repeat];PF13428.1|TPR_14[Tetratricopeptide repeat];PF00515.23|TPR_1[Tetratricopeptide repeat];PF13181.1|TPR_8[Tetratricopeptide repeat];PF13432.1|TPR_16[Tetratricopeptide repeat];PF13414.1|TPR_11[TPR repeat];PF13174.1|TPR_6[Tetratricopeptide repeat];PF07719.12|TPR_2[Tetratricopeptide repeat]	.	GO:0005634;GO:0007070;GO:0006338;GO:0042826;GO:2001020;GO:0035955;GO:0016584;GO:0006366;GO:0001190;GO:0017053;GO:0003713;GO:0045944;GO:2000531;GO:0001191	.	.
scaffold00006	695074	.	C	T	UPSTREAM	MODIFIER	B9J08_004769	C3_07270C_A	UBI4	polyubiquitin	PF11976.3|Rad60-SLD[Ubiquitin-2 like Rad60 SUMO-like];PF00240.18|ubiquitin[Ubiquitin family];PF14560.1|Ubiquitin_2[Ubiquitin-like domain];PF13019.1|Telomere_Sde2[Telomere stability and silencing]	.	GO:0031386;GO:1990429;GO:0005634;GO:0030437;GO:0006513;GO:0016579;GO:0043008;GO:0005737;GO:0000209	.	.
scaffold00006	713648	.	A	T	UPSTREAM	MODIFIER	B9J08_004778	C1_08770W_A	.	hypothetical protein	PF01488.15|Shikimate_DH[Shikimate / quinate 5-dehydrogenase];PF02423.10|OCD_Mu_crystall[Ornithine cyclodeaminase/mu-crystallin family]	.	.	.	.
scaffold00006	767332	.	T	C	UPSTREAM	MODIFIER	B9J08_004796	C3_05940C_A	.	hypothetical protein	PF14259.1|RRM_6[RNA recognition motif (a.k.a. RRM, RBD, or RNP domain)];PF13893.1|RRM_5[RNA recognition motif. (a.k.a. RRM, RBD, or RNP domain)];PF00076.17|RRM_1[RNA recognition motif. (a.k.a. RRM, RBD, or RNP domain)]	.	GO:0000398;GO:0000166;GO:0017069	.	.
scaffold00006	797444	.	C	G	UPSTREAM	MODIFIER	B9J08_004812	C5_01920C_A	.	hypothetical protein	PF03372.18|Exo_endo_phos[Endonuclease/Exonuclease/phosphatase family]	.	GO:0005783;GO:0016021;GO:0004439;EC:3.1.3.36;GO:0046856	.	TMH:2
scaffold00006	896475	.	T	C	UPSTREAM	MODIFIER	B9J08_004855	.	.	hypothetical protein	PF11223.3|DUF3020[Protein of unknown function (DUF3020)]	.	.	.	.
scaffold00006	941823	.	A	G	UPSTREAM	MODIFIER	B9J08_004874	C4_05760W_A	CGT1	hypothetical protein	PF01068.16|DNA_ligase_A_M[ATP dependent DNA ligase domain];PF03919.10|mRNA_cap_C[mRNA capping enzyme, C-terminal domain];PF01331.14|mRNA_cap_enzyme[mRNA capping enzyme, catalytic domain]	EC:2.7.7.50[mRNA guanylyltransferase.]	GO:0031533;EC:2.7.7.50;GO:0045944;GO:0006370;GO:0005525;GO:0004484	.	.
scaffold00006	942005	.	T	C	UPSTREAM	MODIFIER	B9J08_004875	C4_05740C_A	.	hypothetical protein	PF13771.1|zf-HC5HC2H[PHD-like zinc-binding domain];PF01426.13|BAH[BAH domain];PF00628.24|PHD[PHD-finger];PF13831.1|PHD_2[PHD-finger]	.	GO:0072686;GO:0003677;GO:0044732;GO:0048189;GO:0004842;GO:0016574;GO:0043619;GO:0003682;GO:0008270;GO:0036205	.	.
scaffold00006	983545	.	T	A	UPSTREAM	MODIFIER	B9J08_004892	C5_00730W_A	HYR3	hypothetical protein	PF11765.3|Hyphal_reg_CWP[Hyphally regulated cell wall protein N-terminal]	.	.	.	.
scaffold00006	983647	.	A	C	UPSTREAM	MODIFIER	B9J08_004892	C5_00730W_A	HYR3	hypothetical protein	PF11765.3|Hyphal_reg_CWP[Hyphally regulated cell wall protein N-terminal]	.	.	.	.
scaffold00006	1000651	.	A	G	UPSTREAM	MODIFIER	B9J08_004895	.	.	hypothetical protein	.	.	.	.	.
scaffold00002	99115	.	T	C	UPSTREAM	MODIFIER	B9J08_004936	C7_01850C_A	CRN1	hypothetical protein	PF00400.27|WD40[WD domain, G-beta repeat];PF08953.6|DUF1899[Domain of unknown function (DUF1899)];PF08954.6|DUF1900[Domain of unknown function (DUF1900)]	.	GO:0051015;GO:1990819;GO:0005885;GO:0034316;GO:0030674;GO:0051666;GO:0008017;GO:0035838;GO:0030479;GO:0007015;GO:0030139;GO:2000601;GO:0007017;GO:0005826	.	.
scaffold00002	139157	.	T	A	UPSTREAM	MODIFIER	B9J08_004955	C1_03080C_A	TEM1	septum-promoting GTP-binding protein 1	PF08477.8|Miro[Miro-like protein];PF04670.7|Gtr1_RagA[Gtr1/RagA G protein conserved region];PF00025.16|Arf[ADP-ribosylation factor family];PF00071.17|Ras[Ras family]	.	GO:0044732;GO:0010973;GO:0034613;GO:0031028;GO:0005525;GO:0003924	.	.
scaffold00002	152025	.	A	G	UPSTREAM	MODIFIER	B9J08_004961	C2_03050W_A	SHE9	hypothetical protein	PF05546.6|She9_MDM33[She9 / Mdm33 family]	.	GO:0007007;GO:0016021;GO:0005743	.	TMH:2
scaffold00002	188217	.	T	C	UPSTREAM	MODIFIER	B9J08_004976	.	.	hypothetical protein	PF12847.2|Methyltransf_18[Methyltransferase domain];PF13659.1|Methyltransf_26[Methyltransferase domain];PF08242.7|Methyltransf_12[Methyltransferase domain];PF13649.1|Methyltransf_25[Methyltransferase domain];PF08241.7|Methyltransf_11[Methyltransferase domain];PF01209.13|Ubie_methyltran[ubiE/COQ5 methyltransferase family];PF13489.1|Methyltransf_23[Methyltransferase domain];PF13847.1|Methyltransf_3…	.	.	.	.
scaffold00002	188667	.	A	C	UPSTREAM	MODIFIER	B9J08_004976	.	.	hypothetical protein	PF12847.2|Methyltransf_18[Methyltransferase domain];PF13659.1|Methyltransf_26[Methyltransferase domain];PF08242.7|Methyltransf_12[Methyltransferase domain];PF13649.1|Methyltransf_25[Methyltransferase domain];PF08241.7|Methyltransf_11[Methyltransferase domain];PF01209.13|Ubie_methyltran[ubiE/COQ5 methyltransferase family];PF13489.1|Methyltransf_23[Methyltransferase domain];PF13847.1|Methyltransf_3…	.	.	.	.
scaffold00002	216007	.	A	T	UPSTREAM	MODIFIER	B9J08_004988	.	.	hypothetical protein	PF00170.16|bZIP_1[bZIP transcription factor];PF07716.10|bZIP_2[Basic region leucine zipper]	.	GO:0006355;GO:0043565;GO:0003700	.	.
scaffold00002	216012	.	A	T	UPSTREAM	MODIFIER	B9J08_004988	.	.	hypothetical protein	PF00170.16|bZIP_1[bZIP transcription factor];PF07716.10|bZIP_2[Basic region leucine zipper]	.	GO:0006355;GO:0043565;GO:0003700	.	.
scaffold00002	224299	.	T	A	UPSTREAM	MODIFIER	B9J08_004993	CR_03170W_A	DPS1-1	aspartate-tRNA ligase%2C cytoplasmic	TIGR00458[aspS_nondisc: aspartate--tRNA(Asn) ligase];PF00152.15|tRNA-synt_2[tRNA synthetases class II (D, K and N)];PF01336.20|tRNA_anti-codon[OB-fold nucleic acid binding domain]	EC:6.1.1.12[Aspartate--tRNA ligase.]	GO:0006422;GO:0003723;GO:0005634;GO:0005524;EC:6.1.1.12;GO:0005829;GO:0004815	.	.
scaffold00002	228484	.	A	T	UPSTREAM	MODIFIER	B9J08_004998	CR_08370W_A	GSH2	glutathione synthetase	TIGR01986[glut_syn_euk: glutathione synthetase];PF03199.10|GSH_synthase[Eukaryotic glutathione synthase];PF03917.12|GSH_synth_ATP[Eukaryotic glutathione synthase, ATP binding domain]	EC:6.3.2.3[Glutathione synthase.]	GO:0000287;GO:0098849;GO:0005524;GO:0004363;GO:0042803;GO:0036087;GO:0005829;GO:0043295;EC:6.3.2.3;GO:0090423;GO:0034635;GO:0046938;GO:0006750	.	.
scaffold00002	234875	.	C	CGA	UPSTREAM	MODIFIER	B9J08_005000	CR_08350W_A	.	hypothetical protein	.	.	GO:0005783;GO:0006616;GO:0000774;GO:0050790	.	.
scaffold00002	258391	.	A	G	UPSTREAM	MODIFIER	B9J08_005012	C2_05300C_A	.	hypothetical protein	PF12298.3|Bot1p[Eukaryotic mitochondrial regulator protein]	.	GO:0043229;GO:0016020;GO:0044444	.	.
scaffold00002	264718	.	G	GA	UPSTREAM	MODIFIER	B9J08_005017	.	.	hypothetical protein	.	.	.	.	.
scaffold00002	365944	.	G	T	UPSTREAM	MODIFIER	B9J08_005062	C7_02920W_A	.	hypothetical protein	PF01425.16|Amidase[Amidase]	.	GO:0016884;EC:3.5.1.4;GO:0004040	.	.
scaffold00002	390310	.	T	A	UPSTREAM	MODIFIER	B9J08_005073	C2_08270C_A	.	hypothetical protein	PF00069.20|Pkinase[Protein kinase domain];PF07714.12|Pkinase_Tyr[Protein tyrosine kinase]	EC:2.7.11.1[Non-specific serine/threonine protein kinase.]	GO:0005634;GO:0000329;GO:0005524;GO:0004674;EC:2.7.11;GO:0006468;GO:0005886;GO:0016192	ko04711[Circadian rhythm - fly];ko04340[Hedgehog signaling pathway]	.
scaffold00002	442979	.	G	GA	UPSTREAM	MODIFIER	B9J08_005099	C7_01790C_A	RPL5	60S ribosomal protein L5	PF14204.1|Ribosomal_L18_c[Ribosomal L18 C-terminal region];PF00861.17|Ribosomal_L18p[Ribosomal L18p/L5e family]	.	GO:0006412;GO:0000027;GO:0022625;GO:0016021;GO:0008097;GO:0003735	.	.
scaffold00002	580022	.	G	T	UPSTREAM	MODIFIER	B9J08_005168	CR_09830W_A	.	hypothetical protein	PF07690.11|MFS_1[Major Facilitator Superfamily];PF06609.8|TRI12[Fungal trichothecene efflux pump (TRI12)];PF00083.19|Sugar_tr[Sugar (and other) transporter]	.	GO:0055085;GO:0016021	.	TMH:14
scaffold00002	581368	.	T	A	UPSTREAM	MODIFIER	B9J08_005168	CR_09830W_A	.	hypothetical protein	PF07690.11|MFS_1[Major Facilitator Superfamily];PF06609.8|TRI12[Fungal trichothecene efflux pump (TRI12)];PF00083.19|Sugar_tr[Sugar (and other) transporter]	.	GO:0055085;GO:0016021	.	TMH:14
scaffold00002	602694	.	T	G	UPSTREAM	MODIFIER	B9J08_005179	C2_07440C_A	.	hypothetical protein	PF04083.11|Abhydro_lipase[Partial alpha/beta-hydrolase lipase region]	.	GO:0016021;GO:0006629	.	TMH:1
scaffold00002	634601	.	G	A	UPSTREAM	MODIFIER	B9J08_005195	.	.	hypothetical protein	PF06413.6|Neugrin[Neugrin]	.	GO:0005634;GO:0005829;GO:0000002;GO:0005739	.	.
scaffold00002	634992	.	T	C	UPSTREAM	MODIFIER	B9J08_005195	.	.	hypothetical protein	PF06413.6|Neugrin[Neugrin]	.	GO:0005634;GO:0005829;GO:0000002;GO:0005739	.	.
scaffold00002	676153	.	GA	G	UPSTREAM	MODIFIER	B9J08_005214	C4_05010W_A	.	hypothetical protein	PF08154.7|NLE[NLE (NUC135) domain];PF00400.27|WD40[WD domain, G-beta repeat]	.	GO:0005730;GO:0000027	.	.
scaffold00002	714217	.	A	G	UPSTREAM	MODIFIER	B9J08_005228	CR_03720W_A	TAL1	transaldolase	TIGR00874[talAB: transaldolase];PF00923.14|Transaldolase[Transaldolase]	EC:2.2.1.2[Transaldolase.]	GO:0006098;GO:0005634;GO:0004801;GO:0005829;EC:2.2.1.2;GO:0005975	.	.
scaffold00002	714687	.	A	G	UPSTREAM	MODIFIER	B9J08_005228	CR_03720W_A	TAL1	transaldolase	TIGR00874[talAB: transaldolase];PF00923.14|Transaldolase[Transaldolase]	EC:2.2.1.2[Transaldolase.]	GO:0006098;GO:0005634;GO:0004801;GO:0005829;EC:2.2.1.2;GO:0005975	.	.
scaffold00002	719894	.	A	G	UPSTREAM	MODIFIER	B9J08_005227	CR_03710C_A	.	hypothetical protein	PF08588.5|DUF1769[Protein of unknown function (DUF1769)]	.	.	.	.
scaffold00002	760750	.	C	A	UPSTREAM	MODIFIER	B9J08_005246	C5_05380W_A	RPN5	hypothetical protein	PF01399.22|PCI[PCI domain]	.	GO:0043161;GO:0008541;GO:0031595;GO:0005737	.	.
scaffold00002	781320	.	A	C	UPSTREAM	MODIFIER	B9J08_005257	.	.	hypothetical protein	.	.	.	.	.
scaffold00002	785490	.	T	G	UPSTREAM	MODIFIER	B9J08_005260	C1_11310C_A	PSP1	hypothetical protein	PF04468.7|PSP1[PSP1 C-terminal conserved region]	.	.	.	.
scaffold00002	786893	.	AC	A	UPSTREAM	MODIFIER	B9J08_005261	C1_11640C_A	DPP2	hypothetical protein	PF01569.16|PAP2[PAP2 superfamily]	.	GO:0016021	.	TMH:4
scaffold00002	794773	.	AAT	A	UPSTREAM	MODIFIER	B9J08_005263	C1_11930W_B	.	hypothetical protein	PF00169.24|PH[PH domain]	.	.	.	.
scaffold00002	807727	.	C	CT	UPSTREAM	MODIFIER	B9J08_005267	C6_02840C_A	RBF1	hypothetical protein	.	.	GO:0003677;GO:0044424	.	.
scaffold00002	816622	.	T	C	UPSTREAM	MODIFIER	B9J08_005271	C6_03290W_A	.	hypothetical protein	PF00628.24|PHD[PHD-finger]	.	GO:0061186;GO:0030174;GO:0032221;GO:0033698;GO:0035064;GO:0005737;GO:0061188;GO:0070210;GO:0008270;GO:0031939;GO:0008134	.	.
scaffold00002	866297	.	G	A	UPSTREAM	MODIFIER	B9J08_005296	.	.	hypothetical protein	.	.	GO:0050896;GO:0030447	.	.
scaffold00002	910206	.	C	T	UPSTREAM	MODIFIER	B9J08_005317	.	.	hypothetical protein	PF00172.13|Zn_clus[Fungal Zn(2)-Cys(6) binuclear cluster domain]	.	GO:0006357;GO:0000981;GO:0005634;GO:0008270	.	.
scaffold00002	934450	.	C	A	UPSTREAM	MODIFIER	B9J08_005326	.	.	hypothetical protein	.	.	.	.	.
scaffold00002	979387	.	A	T	UPSTREAM	MODIFIER	B9J08_005347	CR_01230C_A	CDC27	hypothetical protein	PF13371.1|TPR_9[Tetratricopeptide repeat];PF00515.23|TPR_1[Tetratricopeptide repeat];PF13181.1|TPR_8[Tetratricopeptide repeat];PF13432.1|TPR_16[Tetratricopeptide repeat];PF13414.1|TPR_11[TPR repeat];PF12895.2|Apc3[Anaphase-promoting complex, cyclosome, subunit 3];PF07719.12|TPR_2[Tetratricopeptide repeat]	.	GO:0045842;GO:0003677;GO:0071851;GO:0016567;GO:0032153;GO:0004842;GO:0005680;GO:0000070;GO:0031145	ko04113[Meiosis - yeast];ko04120[Ubiquitin mediated proteolysis];ko04111[Cell cycle - yeast];ko04914[Progesterone-mediated oocyte maturation];ko04114[Oocyte meiosis]	.
scaffold00002	1009910	.	T	C	UPSTREAM	MODIFIER	B9J08_005358	CR_04110W_A	.	hypothetical protein	PF04410.9|Gar1[Gar1/Naf1 RNA binding region]	.	GO:0042254;GO:0003723;GO:0005654;GO:0005635;GO:0001522;GO:0000493	.	.
scaffold00002	1015465	.	T	C	UPSTREAM	MODIFIER	B9J08_005361	.	.	hypothetical protein	PF07904.8|Eaf7[Chromatin modification-related protein EAF7]	.	GO:0006281;GO:0006355;GO:0030983;GO:0043189;GO:0007005	.	.
scaffold00002	1074436	.	A	G	UPSTREAM	MODIFIER	B9J08_005387	C6_01610W_A	ANB1	eukaryotic translation initiation factor 5A	PF01287.15|eIF-5a[Eukaryotic elongation factor 5A hypusine, DNA-binding OB fold];PF00467.24|KOW[KOW motif];TIGR00037[eIF_5A: translation elongation factor IF5A]	.	GO:0006413;GO:0043022;GO:0003743;GO:0006452;GO:0003746;GO:0045905;GO:0005737;GO:0045901	.	.
scaffold00002	1080100	.	C	T	UPSTREAM	MODIFIER	B9J08_005390	C6_01560W_A	.	hypothetical protein	.	.	GO:0016021	.	TMH:3
scaffold00002	1080863	.	T	A	UPSTREAM	MODIFIER	B9J08_005390	C6_01560W_A	.	hypothetical protein	.	.	GO:0016021	.	TMH:3
scaffold00002	1141671	.	A	C	UPSTREAM	MODIFIER	B9J08_005413	C7_01320W_A	.	hypothetical protein	PF01633.15|Choline_kinase[Choline/ethanolamine kinase]	EC:2.7.1.82[Ethanolamine kinase.]	GO:0006796;GO:0016772	.	.
scaffold00002	1168188	.	G	A	UPSTREAM	MODIFIER	B9J08_005425	C7_01610W_A	.	cytochrome c oxidase assembly factor 3%2C mitochondrial	.	.	GO:0033617;GO:0070130;GO:0031305	.	TMH:1
scaffold00002	1182158	.	G	GGA	UPSTREAM	MODIFIER	B9J08_005428	C7_04210C_A	.	cysteine synthase	PF00291.20|PALP[Pyridoxal-phosphate dependent enzyme]	EC:2.5.1.47[Cysteine synthase.]	EC:2.5.1.47;GO:0006535;GO:0004124;GO:0016740;GO:0030170	ko00920[Sulfur metabolism]	.
scaffold00002	1220705	.	C	G	UPSTREAM	MODIFIER	B9J08_005443	C1_14500C_A	.	hypothetical protein	PF00583.19|Acetyltransf_1[Acetyltransferase (GNAT) family];PF13508.1|Acetyltransf_7[Acetyltransferase (GNAT) domain]	.	EC:2.3.1.87;GO:0004059;EC:2.3.1.57;GO:0008152;GO:0006325;GO:0004145	.	.
scaffold00002	1245258	.	A	T	UPSTREAM	MODIFIER	B9J08_005455	C1_14000C_A	DOA4	hypothetical protein	PF00443.24|UCH[Ubiquitin carboxyl-terminal hydrolase];PF13423.1|UCH_1[Ubiquitin carboxyl-terminal hydrolase]	EC:3.1.2.15[Ubiquitin thiolesterase.]	GO:0006511;EC:3.4.19.12;GO:0016579;GO:0036459	.	.
scaffold00002	1351664	.	A	C	UPSTREAM	MODIFIER	B9J08_005512	C3_04360W_A	.	hypothetical protein	PF00571.23|CBS[CBS domain];PF00654.15|Voltage_CLC[Voltage gated chloride channel]	.	GO:0006879;GO:0005783;GO:0006878;GO:0000324;GO:0034220;GO:0005247;GO:0005797;GO:0005768;GO:0006821;GO:0016021;GO:1903959;GO:0005886	.	TMH:10
scaffold00002	1351665	.	T	A	UPSTREAM	MODIFIER	B9J08_005512	C3_04360W_A	.	hypothetical protein	PF00571.23|CBS[CBS domain];PF00654.15|Voltage_CLC[Voltage gated chloride channel]	.	GO:0006879;GO:0005783;GO:0006878;GO:0000324;GO:0034220;GO:0005247;GO:0005797;GO:0005768;GO:0006821;GO:0016021;GO:1903959;GO:0005886	.	TMH:10
scaffold00002	1365259	.	C	G	UPSTREAM	MODIFIER	B9J08_005518	CR_09010C_A	.	hypothetical protein	PF01053.15|Cys_Met_Meta_PP[Cys/Met metabolism PLP-dependent enzyme]	EC:2.5.1.48[Cystathionine gamma-synthase.]	GO:0005634;GO:0003824;GO:0030170;GO:0005737	ko00450[Selenocompound metabolism];ko00920[Sulfur metabolism]	.
scaffold00011	13824	.	G	A	UPSTREAM	MODIFIER	B9J08_005550	C1_11860W_A	.	hypothetical protein	PF00013.24|KH_1[KH domain]	.	GO:0003723;GO:0044424	.	.
scaffold00011	26725	.	T	TCTG	UPSTREAM	MODIFIER	B9J08_005554	.	.	hypothetical protein	PF04479.8|RTA1[RTA1 like protein]	.	GO:0006950;GO:0016021	.	TMH:6
scaffold00011	27366	.	G	T	UPSTREAM	MODIFIER	B9J08_005554	.	.	hypothetical protein	PF04479.8|RTA1[RTA1 like protein]	.	GO:0006950;GO:0016021	.	TMH:6
scaffold00011	41129	.	T	TG	UPSTREAM	MODIFIER	B9J08_005557	.	.	hypothetical protein	.	.	.	.	.
scaffold00007	82443	.	GA	G	UPSTREAM	MODIFIER	B9J08_004129	C2_08000C_A	KRE30	ABC transporter ATP-binding protein ARB1	PF00005.22|ABC_tran[ABC transporter];PF12848.2|ABC_tran_2[ABC transporter]	.	GO:0005840;GO:0005634;GO:0035690;GO:0005524;GO:0000056;GO:0042624	.	.
scaffold00005	360039	.	GA	G	UPSTREAM	MODIFIER	B9J08_001232	C3_06850W_A	FCR1	hypothetical protein	PF00172.13|Zn_clus[Fungal Zn(2)-Cys(6) binuclear cluster domain]	.	GO:0006357;GO:0000981;GO:0005634;GO:0008270	.	.
scaffold00002	956631	.	T	TC	DOWNSTREAM	MODIFIER	B9J08_005335	C3_03870C_A	SAP9	hypothetical protein	PF00026.18|Asp[Eukaryotic aspartyl protease]	.	EC:3.4.23;GO:0006508;GO:0031505;GO:0004190	.	.
scaffold00002	1187018	.	GT	G	UPSTREAM	MODIFIER	B9J08_005430	C1_01920W_A	ROA1	hypothetical protein	PF00005.22|ABC_tran[ABC transporter];PF01061.19|ABC2_membrane[ABC-2 type transporter];PF13304.1|AAA_21[AAA domain]	.	GO:0005524;GO:0016021;EC:3.6.1.3;GO:0016887	.	TMH:13
scaffold00001	678879	.	G	GC	UPSTREAM	MODIFIER	B9J08_002900	C3_06700C_A	.	hypothetical protein	.	.	.	.	.
scaffold00004	353576	.	GT	G	UPSTREAM	MODIFIER	B9J08_000164	C3_05220W_A	CDR1	multidrug resistance protein CDR1	PF03193.11|DUF258[Protein of unknown function, DUF258];PF00005.22|ABC_tran[ABC transporter];PF01061.19|ABC2_membrane[ABC-2 type transporter];PF06422.7|PDR_CDR[CDR ABC transporter];PF14510.1|ABC_trans_N[ABC-transporter extracellular N-terminal]	.	GO:0035690;GO:0005524;GO:0046677;GO:0046618;EC:3.6.3.44;GO:0046898;GO:0016021;GO:0008559;GO:0005886;GO:0042908;GO:0006855	.	TMH:12
scaffold00008	672275	.	A	AG	FRAME_SHIFT	HIGH	B9J08_001846	CR_04050C_A	MEX67	hypothetical protein	.	.	GO:0031981;GO:0043232;GO:0005737;GO:0051028	ko03015[mRNA surveillance pathway];ko03013[RNA transport]	.
scaffold00008	690126	.	T	TG	FRAME_SHIFT	HIGH	B9J08_001855	C1_12170C_A	.	hypothetical protein	PF03162.8|Y_phosphatase2[Tyrosine phosphatase family]	.	.	.	.
scaffold00001	37112	.	T	TC	FRAME_SHIFT	HIGH	B9J08_002606	CR_08470W_A	.	hypothetical protein	PF12326.3|EOS1[N-glycosylation protein]	.	GO:0034599;GO:0006487;GO:0016021;GO:0005789	.	TMH:4
scaffold00001	231201	.	AATGG	A	FRAME_SHIFT	HIGH	B9J08_002682	CR_00120C_A	MKC1	mitogen-activated protein kinase MKC1	PF00069.20|Pkinase[Protein kinase domain];PF07714.12|Pkinase_Tyr[Protein tyrosine kinase]	EC:2.7.11.24[Mitogen-activated protein kinase.]	GO:0005634;GO:0005524;GO:0044732;GO:0032153;EC:2.7.11.24;GO:0018107;GO:0000196;GO:1901196;GO:0005829;GO:0010524;GO:0004707	ko04912[GnRH signaling pathway];ko04722[Neurotrophin signaling pathway];ko04540[Gap junction];ko04011[MAPK signaling pathway - yeast]	.
scaffold00001	1725427	.	T	TG	FRAME_SHIFT	HIGH	B9J08_003433	C7_01450C_A	PRT1	hypothetical protein	PF13893.1|RRM_5[RNA recognition motif. (a.k.a. RRM, RBD, or RNP domain)];PF00076.17|RRM_1[RNA recognition motif. (a.k.a. RRM, RBD, or RNP domain)]	.	GO:0010494;GO:0031369;GO:0001731;GO:0016282;GO:0043614;GO:0071541;GO:0006446;GO:0003743;GO:0071540;GO:0005829;GO:0000166;GO:0033290	.	.
scaffold00001	2799609	.	CA	C	FRAME_SHIFT	HIGH	B9J08_003925	C1_12450C_A	IRA2	hypothetical protein	.	.	GO:0043087;GO:0007165	.	.
scaffold00007	467637	.	A	AG	FRAME_SHIFT	HIGH	B9J08_004286	C2_03380W_B	PAN1	hypothetical protein	PF08226.6|DUF1720[Domain of unknown function (DUF1720)];PF12763.2|EF-hand_4[Cytoskeletal-regulatory complex EF hand]	.	GO:0003779;GO:0016020;GO:0030479;GO:0005509;GO:0006897	.	.
scaffold00006	536926	.	GT	G	FRAME_SHIFT	HIGH	B9J08_004695	C5_02260C_A	PTH1	hypothetical protein	PF09139.6|Mmp37[Mitochondrial matrix Mmp37]	.	.	.	.
scaffold00002	818493	.	T	TG	FRAME_SHIFT	HIGH	B9J08_005273	C6_03460W_A	.	hypothetical protein	.	.	GO:0006607;GO:0000972;GO:0005487;GO:0044613;GO:0000055;GO:0016973;GO:0044615;GO:0017056	.	.
scaffold00004	152930	.	A	AG	UPSTREAM	MODIFIER	B9J08_000070	.	.	hypothetical protein	.	.	.	.	.
scaffold00004	613595	.	T	TG	UPSTREAM	MODIFIER	B9J08_000296	C4_04290W_A	SEC15	hypothetical protein	PF04091.7|Sec15[Exocyst complex subunit Sec15-like]	.	GO:0000145;GO:0006904;GO:0005934;GO:0000131;GO:0017137;GO:0005935;GO:0006893	.	.
scaffold00004	945932	.	CA	C	UPSTREAM	MODIFIER	B9J08_000446	C3_04000C_A	CTN3	hypothetical protein	PF00755.15|Carn_acyltransf[Choline/Carnitine o-acyltransferase]	.	GO:0016746	.	.
scaffold00003	24456	.	CT	C	UPSTREAM	MODIFIER	B9J08_000512	C2_03170W_A	.	hypothetical protein	PF13279.1|4HBT_2[Thioesterase-like superfamily]	.	GO:0005783;GO:0016021	.	TMH:1
scaffold00003	364970	.	AT	A	UPSTREAM	MODIFIER	B9J08_000678	C1_00810W_A	.	hypothetical protein	PF04101.11|Glyco_tran_28_C[Glycosyltransferase family 28 C-terminal domain];PF13528.1|Glyco_trans_1_3[Glycosyl transferase family 1]	EC:2.4.1.141[N-acetylglucosaminyldiphosphodolichol N-acetylglucosaminyltransferase.]	GO:0005783;EC:2.4.1.141;GO:0044238;GO:0004577;GO:0071704	ko00513[Various types of N-glycan biosynthesis]	.
scaffold00003	439979	.	CAA	C	UPSTREAM	MODIFIER	B9J08_000708	.	.	hypothetical protein	PF09631.5|Sen15[Sen15 protein]	.	GO:0000214;EC:3.1.27.9;GO:0090502;GO:0000379;GO:0000213	.	.
scaffold00003	453918	.	T	TG	UPSTREAM	MODIFIER	B9J08_000714	C7_01030C_A	.	hypothetical protein	PF08161.7|NUC173[NUC173 domain]	.	GO:0005634;GO:0044732	.	.
scaffold00003	509189	.	CA	C	UPSTREAM	MODIFIER	B9J08_000737	C7_02970W_A	ECM39	hypothetical protein	PF03901.12|Glyco_transf_22[Alg9-like mannosyltransferase family]	EC:2.4.1.260[Dol-P-Man:Man(7)GlcNAc(2)-PP-Dol alpha-1,6-mannosyltransferase.]	GO:0097502;GO:0000009;GO:0006486;GO:0005783;GO:0016021;GO:0006488	ko00513[Various types of N-glycan biosynthesis]	TMH:6
scaffold00003	558302	.	G	GC	UPSTREAM	MODIFIER	B9J08_000762	C4_01910W_A	.	hypothetical protein	PF09734.4|Tau95[RNA polymerase III transcription factor (TF)IIIC subunit]	.	GO:0001041;GO:0006359;GO:0043035;GO:0005829;GO:0000127;GO:0000995;GO:0001021;GO:0000999	.	.
scaffold00003	739294	.	CA	C	UPSTREAM	MODIFIER	B9J08_000842	.	.	hypothetical protein	.	.	.	.	.
scaffold00003	759942	.	GA	G	UPSTREAM	MODIFIER	B9J08_000850	C2_08100W_A	.	hypothetical protein	PF00070.22|Pyr_redox[Pyridine nucleotide-disulphide oxidoreductase];PF07992.9|Pyr_redox_2[Pyridine nucleotide-disulphide oxidoreductase]	.	GO:0055114;GO:0016491	.	.
scaffold00003	823795	.	T	TC	UPSTREAM	MODIFIER	B9J08_000883	C2_05750W_A	.	hypothetical protein	PF07767.6|Nop53[Nop53 (60S ribosomal biogenesis)]	.	GO:0000055;GO:0005730;GO:0000463;GO:0019843	.	.
scaffold00003	837949	.	C	CG	UPSTREAM	MODIFIER	B9J08_000891	.	.	hypothetical protein	.	.	.	.	.
scaffold00003	863059	.	T	TG	UPSTREAM	MODIFIER	B9J08_000905	.	.	hypothetical protein	PF08550.5|DUF1752[Fungal protein of unknown function (DUF1752)]	.	.	.	.
scaffold00003	1048642	.	T	TG	UPSTREAM	MODIFIER	B9J08_000976	CR_07400C_A	LPD1	dihydrolipoyl dehydrogenase	PF02852.17|Pyr_redox_dim[Pyridine nucleotide-disulphide oxidoreductase, dimerisation domain];PF00070.22|Pyr_redox[Pyridine nucleotide-disulphide oxidoreductase];PF01134.17|GIDA[Glucose inhibited division protein A];TIGR01350[lipoamide_DH: dihydrolipoyl dehydrogenase];PF07992.9|Pyr_redox_2[Pyridine nucleotide-disulphide oxidoreductase]	EC:1.8.1.4[Dihydrolipoyl dehydrogenase.]	EC:1.8.1.4;GO:0009353;GO:0004148;GO:0005960;GO:0042645;GO:0050660;GO:0055114;GO:0045454;GO:0006574;EC:1.4.4.2;GO:0006564;GO:0036180;GO:0006090;GO:0006546;GO:0042743;EC:1.2.4.2;GO:0004375;GO:0006552;GO:0004738;GO:0006103;GO:0004591;GO:0005967;GO:0006550	ko00020[Citrate cycle (TCA cycle)];ko00260[Glycine, serine and threonine metabolism];ko00280[Valine, leucine and isoleucine degradation];ko00620[Pyruvate metabolism]	.
scaffold00003	1210309	.	A	AG	UPSTREAM	MODIFIER	B9J08_001048	C1_01560W_A	SIZ1	hypothetical protein	PF14324.1|PINIT[PINIT domain];PF02891.15|zf-MIZ[MIZ/SP-RING zinc finger];PF11789.3|zf-Nse[Zinc-finger of the MIZ type in Nse subunit];PF02037.22|SAP[SAP domain]	EC:6.3.2.-[Acid--D-amino-acid ligases (peptide synthases).]	GO:0008270;GO:0019789	ko05200[Pathways in cancer];ko05222[Small cell lung cancer];ko05160[Hepatitis C];ko04630[Jak-STAT signaling pathway]	.
scaffold00005	41732	.	CTCG	C	UPSTREAM	MODIFIER	B9J08_001078	.	.	hypothetical protein	PF09753.4|Use1[Membrane fusion protein Use1]	.	GO:0016021	.	TMH:1
scaffold00005	192446	.	A	AG	UPSTREAM	MODIFIER	B9J08_001151	C2_07600C_A	MSC7	hypothetical protein	PF00171.17|Aldedh[Aldehyde dehydrogenase family]	.	GO:0008886;GO:0007131;EC:1.2.1.39;EC:1.2.1.9;GO:0008957;GO:0016021;GO:0055114	.	TMH:2
scaffold00005	416273	.	CA	C	UPSTREAM	MODIFIER	B9J08_001261	CR_10730C_A	.	hypothetical protein	PF04818.8|CTD_bind[RNA polymerase II-binding domain.]	.	GO:0005634;GO:0005829;GO:0031139	.	.
scaffold00005	539440	.	TA	T	UPSTREAM	MODIFIER	B9J08_001307	C5_00330C_A	.	hypothetical protein	.	.	GO:0051604;GO:0016021;GO:0005739;GO:0006113	.	TMH:1
scaffold00005	584201	.	AT	A	UPSTREAM	MODIFIER	B9J08_001330	C5_00770C_A	FOL1	dihydropteroate synthase	TIGR01498[folK: 2-amino-4-hydroxy-6-hydroxymethyldihydropteridine diphosphokinase];PF01288.15|HPPK[7,8-dihydro-6-hydroxymethylpterin-pyrophosphokinase (HPPK)];PF00809.17|Pterin_bind[Pterin binding enzyme];PF02152.13|FolB[Dihydroneopterin aldolase];TIGR01496[DHPS: dihydropteroate synthase]	EC:2.7.6.3[2-amino-4-hydroxy-6-hydroxymethyldihydropteridine diphosphokinase.];EC:4.1.2.25[Dihydroneopterin aldolase.];EC:2.5.1.15[Dihydropteroate synthase.]	GO:0005740;EC:2.7.6.3;EC:4.1.2.25;EC:2.5.1.15;GO:0005488;GO:0009396;GO:0003848;GO:0004150;GO:0004156	.	.
scaffold00005	769475	.	CA	C	UPSTREAM	MODIFIER	B9J08_001415	C4_02960W_A	.	hypothetical protein	.	EC:6.3.2.19[Ubiquitin--protein ligase.]	GO:0008270	.	.
scaffold00005	1018832	.	CTT	C	UPSTREAM	MODIFIER	B9J08_001519	C2_08050C_A	SIT1	hypothetical protein	PF07690.11|MFS_1[Major Facilitator Superfamily]	.	GO:0016021	.	TMH:12
scaffold00008	145865	.	T	TG	UPSTREAM	MODIFIER	B9J08_001590	C1_11670W_A	.	hypothetical protein	PF08611.5|DUF1774[Fungal protein of unknown function (DUF1774)]	.	GO:0016021	.	TMH:7
scaffold00008	240930	.	AT	A	UPSTREAM	MODIFIER	B9J08_001640	C2_00240C_A	SOD6	hypothetical protein	PF00080.15|Sod_Cu[Copper/zinc superoxide dismutase (SODC)]	.	GO:0006801;GO:0016209;GO:0031224;GO:0046872;GO:0098869;GO:0055114;GO:0016491	.	TMH:1
scaffold00008	320563	.	GA	G	UPSTREAM	MODIFIER	B9J08_001678	C6_00290W_A	.	hypothetical protein	.	.	.	.	.
scaffold00008	474307	.	CA	C	UPSTREAM	MODIFIER	B9J08_001748	C3_07560W_A	TCC1	hypothetical protein	PF00515.23|TPR_1[Tetratricopeptide repeat];PF13181.1|TPR_8[Tetratricopeptide repeat];PF14559.1|TPR_19[Tetratricopeptide repeat];PF07719.12|TPR_2[Tetratricopeptide repeat]	.	GO:0000122;GO:0005634;GO:0071467;GO:0009405;GO:0036177	.	.
scaffold00008	488227	.	CT	C	UPSTREAM	MODIFIER	B9J08_001757	C4_04570W_A	RCE1	hypothetical protein	PF02517.11|Abi[CAAX protease self-immunity]	EC:3.4.22.-[Cysteine endopeptidases.]	GO:0019538	.	TMH:5
scaffold00008	576879	.	A	AG	UPSTREAM	MODIFIER	B9J08_001796	C6_01040C_A	.	hypothetical protein	PF00271.26|Helicase_C[Helicase conserved C-terminal domain];PF04408.18|HA2[Helicase associated domain (HA2)];PF00270.24|DEAD[DEAD/DEAH box helicase];PF07717.11|OB_NTP_bind[Oligonucleotide/oligosaccharide-binding (OB)-fold]	EC:3.6.4.13[RNA helicase.]	GO:0000462;GO:0005524;GO:0005730;GO:0003724;GO:0008026;GO:0003676	.	.
scaffold00008	626601	.	A	AG	UPSTREAM	MODIFIER	B9J08_001821	C1_06060C_A	ACP1	acyl carrier protein	TIGR00517[acyl_carrier: acyl carrier protein];PF00550.20|PP-binding[Phosphopantetheine attachment site]	EC:1.6.99.3[NADH dehydrogenase.];EC:1.6.5.3[NADH:ubiquinone reductase (H(+)-translocating).]	GO:0006633;GO:0055114;GO:0016491	ko05016[Huntington's disease];ko05010[Alzheimer's disease];ko05012[Parkinson's disease]	.
scaffold00010	268308	.	T	TC	UPSTREAM	MODIFIER	B9J08_002067	C4_01100C_A	AGP2	hypothetical protein	PF00324.16|AA_permease[Amino acid permease];PF13520.1|AA_permease_2[Amino acid permease]	.	GO:1902269;GO:1902603;GO:1902047;GO:0000329;GO:0015226;GO:0006970;GO:1902274;GO:0015203;GO:0005887;GO:0006631;GO:0003333;GO:0005789;GO:0015171	.	TMH:12
scaffold00009	179316	.	CA	C	UPSTREAM	MODIFIER	B9J08_002308	C1_09360C_A	.	hypothetical protein	.	.	GO:0005739;GO:0005886	.	.
scaffold00009	327565	.	AT	A	UPSTREAM	MODIFIER	B9J08_002377	C1_09420W_A	LIP2	hypothetical protein	PF03583.9|LIP[Secretory lipase]	.	EC:3.1.1.3;GO:0016042;GO:0004806;GO:0016021	.	.
scaffold00001	22918	.	T	TC	UPSTREAM	MODIFIER	B9J08_002595	C1_02750C_A	.	hypothetical protein	PF01426.13|BAH[BAH domain];PF00439.20|Bromodomain[Bromodomain]	.	GO:0016586;GO:0003682	.	.
scaffold00001	244685	.	G	GC	DOWNSTREAM	MODIFIER	B9J08_002686	C7_03220C_A	ZCF29	hypothetical protein	.	.	.	.	.
scaffold00001	289770	.	AT	A	UPSTREAM	MODIFIER	B9J08_002710	C7_03220C_A	ZCF29	hypothetical protein	PF04082.13|Fungal_trans[Fungal specific transcription factor domain];PF00172.13|Zn_clus[Fungal Zn(2)-Cys(6) binuclear cluster domain]	.	GO:0003677;GO:0005634;GO:0008270;GO:0006351	.	.
scaffold00001	366538	.	T	TC	UPSTREAM	MODIFIER	B9J08_002752	CR_10000C_A	.	hypothetical protein	PF01035.15|DNA_binding_1[6-O-methylguanine DNA methyltransferase, DNA binding domain]	.	GO:0006281;GO:0003824	.	.
scaffold00001	633563	.	GA	G	UPSTREAM	MODIFIER	B9J08_002877	C4_06130W_A	.	hypothetical protein	PF12814.2|Mcp5_PH[Meiotic cell cortex C-terminal pleckstrin homology]	.	GO:0000226;GO:0005783;GO:0005938;GO:0005934;GO:0030473;GO:0005543;GO:0015631;GO:0000001;GO:0032065;GO:0005739;GO:0000266	.	.
scaffold00001	1290945	.	CT	C	UPSTREAM	MODIFIER	B9J08_003230	C1_03710C_A	MSB1	hypothetical protein	PF08101.6|DUF1708[Domain of unknown function (DUF1708)]	.	GO:0030010;GO:0005739	.	.
scaffold00001	1338276	.	GA	G	UPSTREAM	MODIFIER	B9J08_003246	C1_00700W_A	.	hypothetical protein	PF13232.1|Complex1_LYR_1[Complex1_LYR-like];PF05347.10|Complex1_LYR[Complex 1 protein (LYR family)]	EC:1.6.99.3[NADH dehydrogenase.];EC:1.6.5.3[NADH:ubiquinone reductase (H(+)-translocating).]	EC:1.6.5.3;GO:0055114;GO:0008137	ko05016[Huntington's disease];ko05010[Alzheimer's disease];ko05012[Parkinson's disease]	.
scaffold00001	1623759	.	AT	A	UPSTREAM	MODIFIER	B9J08_003389	C1_06840C_A	.	hypothetical protein	.	.	GO:0033617;GO:0016021;GO:0005739	.	TMH:1
scaffold00001	1843872	.	GAA	G	UPSTREAM	MODIFIER	B9J08_003484	.	.	hypothetical protein	.	.	.	.	.
scaffold00001	1936555	.	C	CG	UPSTREAM	MODIFIER	B9J08_003531	C4_00650W_A	HIS5	histidinol-phosphate transaminase	PF00155.16|Aminotran_1_2[Aminotransferase class I and II];TIGR01141[hisC: histidinol-phosphate transaminase]	EC:2.6.1.9[Histidinol-phosphate transaminase.]	GO:0000105;GO:0004400;EC:2.6.1.9;GO:0030170	ko00401[Novobiocin biosynthesis];ko00350[Tyrosine metabolism];ko00360[Phenylalanine metabolism];ko00400[Phenylalanine, tyrosine and tryptophan biosynthesis];ko00960[Tropane, piperidine and pyridine alkaloid biosynthesis]	.
scaffold00001	2048719	.	T	TG	UPSTREAM	MODIFIER	B9J08_003586	C2_10570W_A	SGS1	hypothetical protein	PF00271.26|Helicase_C[Helicase conserved C-terminal domain];PF00570.18|HRDC[HRDC domain];PF11408.3|Helicase_Sgs1[Sgs1 RecQ helicase];PF00270.24|DEAD[DEAD/DEAH box helicase];PF09382.5|RQC[RQC domain]	EC:3.6.4.12[DNA helicase.]	GO:0071140;GO:0005524;GO:0031860;GO:0006268;GO:0000706;GO:0043007;GO:0031573;GO:0000070;GO:0005730;GO:0006265;GO:0031292;GO:0006301;GO:0000722;GO:1903221;GO:0003676;GO:0010947;GO:0000228;GO:0001302;GO:0044182;GO:0043140;GO:0000724;GO:1990426;GO:0031422;GO:0070914;GO:0045132	.	.
scaffold00001	2214511	.	TA	T	UPSTREAM	MODIFIER	B9J08_003660	C6_03940C_A	PBP2	hypothetical protein	PF00013.24|KH_1[KH domain];PF13014.1|KH_3[KH domain]	.	GO:0003729;GO:0005634;GO:0005737	.	.
scaffold00001	2253786	.	TA	T	UPSTREAM	MODIFIER	B9J08_003680	C6_02050W_A	DBR1	hypothetical protein	PF05011.8|DBR1[Lariat debranching enzyme, C-terminal domain]	.	GO:0007124;GO:0006401;GO:0032197;GO:0008419;GO:0090502;GO:0045292;GO:0016074	.	.
scaffold00001	2817567	.	CT	C	UPSTREAM	MODIFIER	B9J08_003929	.	.	hypothetical protein	.	.	.	.	.
scaffold00001	2868633	.	T	TC	UPSTREAM	MODIFIER	B9J08_003954	C3_04490W_A	RAX1	hypothetical protein	PF00615.14|RGS[Regulator of G protein signaling domain]	.	GO:0000282;GO:0016021;GO:0005935	.	TMH:3
scaffold00001	2936137	.	A	ATTCCCAAACGCTACAG	UPSTREAM	MODIFIER	B9J08_003986	CR_06520C_A	.	hypothetical protein	PF09439.5|SRPRB[Signal recognition particle receptor beta subunit];PF08477.8|Miro[Miro-like protein];PF00025.16|Arf[ADP-ribosylation factor family];PF00071.17|Ras[Ras family]	.	GO:0007264;GO:0005829;GO:0005794;GO:0042147;GO:0005525;GO:0005801;GO:0003924	.	.
scaffold00001	2955916	.	AT	A	UPSTREAM	MODIFIER	B9J08_003997	C3_03270W_A	.	hypothetical protein	PF07047.7|OPA3[Optic atrophy 3 protein (OPA3)]	.	GO:0016021;GO:0005737	.	.
scaffold00001	3017525	.	A	AG	UPSTREAM	MODIFIER	B9J08_004024	C1_10100C_A	NTF2	nuclear transport factor 2	PF02136.15|NTF2[Nuclear transport factor 2 (NTF2) domain]	.	GO:0008536;GO:0019031;GO:0005829;GO:0005635;GO:0006606	.	.
scaffold00001	3060343	.	CA	C	UPSTREAM	MODIFIER	B9J08_004041	C1_10190W_A	.	hypothetical protein	PF13865.1|FoP_duplication[C-terminal duplication domain of Friend of PRMT1]	.	GO:0000166	ko03040[Spliceosome];ko03015[mRNA surveillance pathway]	.
scaffold00001	3108815	.	GA	G	UPSTREAM	MODIFIER	B9J08_004071	C5_03120W_A	.	hypothetical protein	PF06728.8|PIG-U[GPI transamidase subunit PIG-U]	.	GO:0006506;GO:0005783;GO:0016021	.	TMH:7
scaffold00001	3115369	.	GT	G	UPSTREAM	MODIFIER	B9J08_004069	C5_03100C_A	.	hypothetical protein	PF10309.4|DUF2414[Protein of unknown function (DUF2414)]	.	GO:0003729;GO:0000166;GO:0000340	.	.
scaffold00001	3146428	.	CA	C	DOWNSTREAM	MODIFIER	B9J08_004089	CR_02640W_A	RFG1	hypothetical protein	PF00505.14|HMG_box[HMG (high mobility group) box];PF09011.5|HMG_box_2[HMG-box domain]	.	GO:0097201;GO:0000987;GO:0008301;GO:0001135;GO:0006366;GO:0001078	.	.
scaffold00007	167264	.	G	GC	UPSTREAM	MODIFIER	B9J08_004151	C1_13120C_A	MON2	hypothetical protein	PF12783.2|Sec7_N[Guanine nucleotide exchange factor in Golgi transport N-terminal]	.	GO:0006895;GO:0019898;GO:0043547;GO:0005085;GO:0005802;GO:0031901;GO:0006623;GO:0005829;GO:0006897	.	.
scaffold00006	184248	.	T	TG	UPSTREAM	MODIFIER	B9J08_004543	C7_03040W_A	.	hypothetical protein	PF04387.9|PTPLA[Protein tyrosine phosphatase-like protein, PTPLA]	.	GO:0016021	.	TMH:4
scaffold00006	414652	.	GA	G	UPSTREAM	MODIFIER	B9J08_004637	.	.	hypothetical protein	.	.	.	.	.
scaffold00006	422191	.	GA	G	UPSTREAM	MODIFIER	B9J08_004640	C1_13940W_A	SIM1	hypothetical protein	PF03856.8|SUN[Beta-glucosidase (SUN family)]	.	GO:0044464	.	.
scaffold00006	696849	.	T	TC	UPSTREAM	MODIFIER	B9J08_004770	.	.	hypothetical protein	PF01417.15|ENTH[ENTH domain]	.	.	.	.
scaffold00006	722992	.	CT	C	UPSTREAM	MODIFIER	B9J08_004783	C4_06420W_A	.	hypothetical protein	.	.	GO:0031505	.	.
scaffold00002	195379	.	CAA	C	UPSTREAM	MODIFIER	B9J08_004980	.	.	hypothetical protein	PF06881.6|Elongin_A[RNA polymerase II transcription factor SIII (Elongin) subunit A]	.	GO:0005634;GO:0006355;GO:0016021	.	.
scaffold00002	224615	.	CA	C	UPSTREAM	MODIFIER	B9J08_004993	CR_03170W_A	DPS1-1	aspartate-tRNA ligase%2C cytoplasmic	TIGR00458[aspS_nondisc: aspartate--tRNA(Asn) ligase];PF00152.15|tRNA-synt_2[tRNA synthetases class II (D, K and N)];PF01336.20|tRNA_anti-codon[OB-fold nucleic acid binding domain]	EC:6.1.1.12[Aspartate--tRNA ligase.]	GO:0006422;GO:0003723;GO:0005634;GO:0005524;EC:6.1.1.12;GO:0005829;GO:0004815	.	.
scaffold00002	249751	.	AT	A	UPSTREAM	MODIFIER	B9J08_005010	C2_05340C_A	RPC40	DNA-directed RNA polymerase I and III subunit RPAC1	PF01000.21|RNA_pol_A_bac[RNA polymerase Rpb3/RpoA insert domain];PF01193.19|RNA_pol_L[RNA polymerase Rpb3/Rpb11 dimerisation domain]	.	GO:0003677;GO:0006360;GO:0001054;GO:0005666;GO:0046983;GO:0005829;GO:0001056;GO:0042797;GO:0005736	ko04623[Cytosolic DNA-sensing pathway];ko00240[Pyrimidine metabolism];ko03020[RNA polymerase]	.
scaffold00002	520926	.	GT	G	UPSTREAM	MODIFIER	B9J08_005132	CR_06720W_A	NMD3	60S ribosomal export protein NMD3	PF04981.8|NMD3[NMD3 family]	.	GO:0000055;GO:0005634;GO:0043023;GO:0022625	ko03013[RNA transport]	.
scaffold00002	635118	.	G	GC	UPSTREAM	MODIFIER	B9J08_005195	.	.	hypothetical protein	PF06413.6|Neugrin[Neugrin]	.	GO:0005634;GO:0005829;GO:0000002;GO:0005739	.	.
scaffold00002	1153113	.	T	TG	UPSTREAM	MODIFIER	B9J08_005419	C7_00830C_A	.	hypothetical protein	.	.	.	.	.
scaffold00002	1174861	.	GA	G	UPSTREAM	MODIFIER	B9J08_005427	C7_04200C_A	.	hypothetical protein	PF08389.7|Xpo1[Exportin 1-like protein]	.	GO:0003723;GO:0008536;GO:0006388;GO:0005829;GO:0005635;GO:0071528;GO:0016363;GO:0005739	.	.
scaffold00002	1366185	.	A	AC	UPSTREAM	MODIFIER	B9J08_005518	CR_09010C_A	.	hypothetical protein	PF01053.15|Cys_Met_Meta_PP[Cys/Met metabolism PLP-dependent enzyme]	EC:2.5.1.48[Cystathionine gamma-synthase.]	GO:0005634;GO:0003824;GO:0030170;GO:0005737	ko00450[Selenocompound metabolism];ko00920[Sulfur metabolism]	.
scaffold00002	1400235	.	CT	C	DOWNSTREAM	MODIFIER	B9J08_005534	C1_09540W_B	.	hypothetical protein	.	.	.	.	.
scaffold00012	27789	.	A	AG	UPSTREAM	MODIFIER	B9J08_005576	.	.	hypothetical protein	.	.	GO:0016021	.	TMH:4

## Sheet: Data8. B8441
Supplementary data 8. Genetic variants, effect and impact in Candida auris B8441
Scaffold	Position	REF	ALT	Effect	Impact	Locus ID	C. albicans ID	C. albicans homologs	Gene name	PFAM	KEGG	GO	KO	TMHMM
scaffold00008	690126	T	TG	FRAME_SHIFT	HIGH	B9J08_001855	C1_12170C_A	.	name="hypothetical protein"	PF03162.8|Y_phosphatase2[Tyrosine phosphatase family]	.	.	.	.
scaffold00001	2799609	CA	C	FRAME_SHIFT	HIGH	B9J08_003925	C1_12450C_A	IRA2	name="hypothetical protein"	.	.	GO:0043087;GO:0007165	.	.
scaffold00007	467637	A	AG	FRAME_SHIFT	HIGH	B9J08_004286	C2_03380W_B	PAN1	name="hypothetical protein"	PF08226.6|DUF1720[Domain of unknown function (DUF1720)];PF12763.2|EF-hand_4[Cytoskeletal-regulatory complex EF hand]	.	GO:0003779;GO:0016020;GO:0030479;GO:0005509;GO:0006897	.	.
scaffold00006	536926	GT	G	FRAME_SHIFT	HIGH	B9J08_004695	C5_02260C_A	PTH1	name="hypothetical protein"	PF09139.6|Mmp37[Mitochondrial matrix Mmp37]	.	.	.	.
scaffold00002	818493	T	TG	FRAME_SHIFT	HIGH	B9J08_005273	C6_03460W_A	.	name="hypothetical protein"	.	.	GO:0006607;GO:0000972;GO:0005487;GO:0044613;GO:0000055;GO:0016973;GO:0044615;GO:0017056	.	.
scaffold00001	1725427	T	TG	FRAME_SHIFT	HIGH	B9J08_003433	C7_01450C_A	PRT1	name="hypothetical protein"	PF13893.1|RRM_5[RNA recognition motif. (a.k.a. RRM, RBD, or RNP domain)];PF00076.17|RRM_1[RNA recognition motif. (a.k.a. RRM, RBD, or RNP domain)]	.	GO:0010494;GO:0031369;GO:0001731;GO:0016282;GO:0043614;GO:0071541;GO:0006446;GO:0003743;GO:0071540;GO:0005829;GO:0000166;GO:0033290	.	.
scaffold00001	231201	AATGG	A	FRAME_SHIFT	HIGH	B9J08_002682	CR_00120C_A	MKC1	name="mitogen-activated protein kinase MKC1"	PF00069.20|Pkinase[Protein kinase domain];PF07714.12|Pkinase_Tyr[Protein tyrosine kinase]	EC:2.7.11.24[Mitogen-activated protein kinase.]	GO:0005634;GO:0005524;GO:0044732;GO:0032153;EC:2.7.11.24;GO:0018107;GO:0000196;GO:1901196;GO:0005829;GO:0010524;GO:0004707	ko04912[GnRH signaling pathway];ko04722[Neurotrophin signaling pathway];ko04540[Gap junction];ko04011[MAPK signaling pathway - yeast]	.
scaffold00008	672275	A	AG	FRAME_SHIFT	HIGH	B9J08_001846	CR_04050C_A	MEX67	name="hypothetical protein"	.	.	GO:0031981;GO:0043232;GO:0005737;GO:0051028	ko03015[mRNA surveillance pathway];ko03013[RNA transport]	.
scaffold00001	37112	T	TC	FRAME_SHIFT	HIGH	B9J08_002606	CR_08470W_A	.	name="hypothetical protein"	PF12326.3|EOS1[N-glycosylation protein]	.	GO:0034599;GO:0006487;GO:0016021;GO:0005789	.	TMH:4
scaffold00003	134827	T	G	SYNONYMOUS_CODING	LOW	B9J08_000569T0	CR_07320C_A	.	name="hypothetical protein"	PF06984.8|MRP-L47[Mitochondrial 39-S ribosomal protein L47	MRP-L47)]	.	GO:0005761;GO:0006412	.
scaffold00004	152930	A	AG	UPSTREAM	MODIFIER	B9J08_000070	.	.	name="hypothetical protein"	.	.	.	.	.
scaffold00003	439979	CAA	C	UPSTREAM	MODIFIER	B9J08_000708	.	.	name="hypothetical protein"	PF09631.5|Sen15[Sen15 protein]	.	GO:0000214;EC:3.1.27.9;GO:0090502;GO:0000379;GO:0000213	.	.
scaffold00003	739294	CA	C	UPSTREAM	MODIFIER	B9J08_000842	.	.	name="hypothetical protein"	.	.	.	.	.
scaffold00003	837949	C	CG	UPSTREAM	MODIFIER	B9J08_000891	.	.	name="hypothetical protein"	.	.	.	.	.
scaffold00003	863059	T	TG	UPSTREAM	MODIFIER	B9J08_000905	.	.	name="hypothetical protein"	PF08550.5|DUF1752[Fungal protein of unknown function (DUF1752)]	.	.	.	.
scaffold00005	41732	CTCG	C	UPSTREAM	MODIFIER	B9J08_001078	.	.	name="hypothetical protein"	PF09753.4|Use1[Membrane fusion protein Use1]	.	GO:0016021	.	TMH:1
scaffold00001	1843872	GAA	G	UPSTREAM	MODIFIER	B9J08_003484	.	.	name="hypothetical protein"	.	.	.	.	.
scaffold00001	2817567	CT	C	UPSTREAM	MODIFIER	B9J08_003929	.	.	name="hypothetical protein"	.	.	.	.	.
scaffold00007	7121	T	TC	UPSTREAM	MODIFIER	B9J08_004104	.	.	name="hypothetical protein"	PF00085.15|Thioredoxin[Thioredoxin]	.	.	.	.
scaffold00006	414652	GA	G	UPSTREAM	MODIFIER	B9J08_004637	.	.	name="hypothetical protein"	.	.	.	.	.
scaffold00006	696849	T	TC	UPSTREAM	MODIFIER	B9J08_004770	.	.	name="hypothetical protein"	PF01417.15|ENTH[ENTH domain]	.	.	.	.
scaffold00002	195379	CAA	C	UPSTREAM	MODIFIER	B9J08_004980	.	.	name="hypothetical protein"	PF06881.6|Elongin_A[RNA polymerase II transcription factor SIII (Elongin) subunit A]	.	GO:0005634;GO:0006355;GO:0016021	.	.
scaffold00002	635118	G	GC	UPSTREAM	MODIFIER	B9J08_005195	.	.	name="hypothetical protein"	PF06413.6|Neugrin[Neugrin]	.	GO:0005634;GO:0005829;GO:0000002;GO:0005739	.	.
scaffold00002	866705	GA	G	UPSTREAM	MODIFIER	B9J08_005296	.	.	name="hypothetical protein"	.	.	GO:0050896;GO:0030447	.	.
scaffold00002	866708	A	C	UPSTREAM	MODIFIER	B9J08_005296	.	.	name="hypothetical protein"	.	.	GO:0050896;GO:0030447	.	.
scaffold00012	27789	A	AG	UPSTREAM	MODIFIER	B9J08_005576	.	.	name="hypothetical protein"	.	.	GO:0016021	.	TMH:4
scaffold00001	1338276	GA	G	UPSTREAM	MODIFIER	B9J08_003246	C1_00700W_A	.	name="hypothetical protein"	PF13232.1|Complex1_LYR_1[Complex1_LYR-like];PF05347.10|Complex1_LYR[Complex 1 protein (LYR family)]	EC:1.6.99.3[NADH dehydrogenase.];EC:1.6.5.3[NADH:ubiquinone reductase (H(+)-translocating).]	EC:1.6.5.3;GO:0055114;GO:0008137	ko05016[Huntington's disease];ko05010[Alzheimer's disease];ko05012[Parkinson's disease]	.
scaffold00003	364970	AT	A	UPSTREAM	MODIFIER	B9J08_000678	C1_00810W_A	.	name="hypothetical protein"	PF04101.11|Glyco_tran_28_C[Glycosyltransferase family 28 C-terminal domain];PF13528.1|Glyco_trans_1_3[Glycosyl transferase family 1]	EC:2.4.1.141[N-acetylglucosaminyldiphosphodolichol N-acetylglucosaminyltransferase.]	GO:0005783;EC:2.4.1.141;GO:0044238;GO:0004577;GO:0071704	ko00513[Various types of N-glycan biosynthesis]	.
scaffold00003	1210309	A	AG	UPSTREAM	MODIFIER	B9J08_001048	C1_01560W_A	SIZ1	name="hypothetical protein"	PF14324.1|PINIT[PINIT domain];PF02891.15|zf-MIZ[MIZ/SP-RING zinc finger];PF11789.3|zf-Nse[Zinc-finger of the MIZ type in Nse subunit];PF02037.22|SAP[SAP domain]	EC:6.3.2.-[Acid--D-amino-acid ligases (peptide synthases).]	GO:0008270;GO:0019789	ko05200[Pathways in cancer];ko05222[Small cell lung cancer];ko05160[Hepatitis C];ko04630[Jak-STAT signaling pathway]	.
scaffold00002	1187018	GT	G	UPSTREAM	MODIFIER	B9J08_005430	C1_01920W_A	ROA1	name="hypothetical protein"	PF00005.22|ABC_tran[ABC transporter];PF01061.19|ABC2_membrane[ABC-2 type transporter];PF13304.1|AAA_21[AAA domain]	.	GO:0005524;GO:0016021;EC:3.6.1.3;GO:0016887	.	TMH:13
scaffold00001	22918	T	TC	UPSTREAM	MODIFIER	B9J08_002595	C1_02750C_A	.	name="hypothetical protein"	PF01426.13|BAH[BAH domain];PF00439.20|Bromodomain[Bromodomain]	.	GO:0016586;GO:0003682	.	.
scaffold00001	1290945	CT	C	UPSTREAM	MODIFIER	B9J08_003230	C1_03710C_A	MSB1	name="hypothetical protein"	PF08101.6|DUF1708[Domain of unknown function (DUF1708)]	.	GO:0030010;GO:0005739	.	.
scaffold00008	626601	A	AG	UPSTREAM	MODIFIER	B9J08_001821	C1_06060C_A	ACP1	name="acyl carrier protein"	TIGR00517[acyl_carrier: acyl carrier protein];PF00550.20|PP-binding[Phosphopantetheine attachment site]	EC:1.6.99.3[NADH dehydrogenase.];EC:1.6.5.3[NADH:ubiquinone reductase (H(+)-translocating).]	GO:0006633;GO:0055114;GO:0016491	ko05016[Huntington's disease];ko05010[Alzheimer's disease];ko05012[Parkinson's disease]	.
scaffold00001	1623759	AT	A	UPSTREAM	MODIFIER	B9J08_003389	C1_06840C_A	.	name="hypothetical protein"	.	.	GO:0033617;GO:0016021;GO:0005739	.	TMH:1
scaffold00009	179316	CA	C	UPSTREAM	MODIFIER	B9J08_002308	C1_09360C_A	.	name="hypothetical protein"	.	.	GO:0005739;GO:0005886	.	.
scaffold00009	327565	AT	A	UPSTREAM	MODIFIER	B9J08_002377	C1_09420W_A	LIP2	name="hypothetical protein"	PF03583.9|LIP[Secretory lipase]	.	EC:3.1.1.3;GO:0016042;GO:0004806;GO:0016021	.	.
scaffold00002	1400235	CT	C	DOWNSTREAM	MODIFIER	B9J08_005534	C1_09540W_B	.	name="hypothetical protein"	.	.	.	.	.
scaffold00001	3017525	A	AG	UPSTREAM	MODIFIER	B9J08_004024	C1_10100C_A	NTF2	name="nuclear transport factor 2"	PF02136.15|NTF2[Nuclear transport factor 2 (NTF2) domain]	.	GO:0008536;GO:0019031;GO:0005829;GO:0005635;GO:0006606	.	.
scaffold00001	3060343	CA	C	UPSTREAM	MODIFIER	B9J08_004041	C1_10190W_A	.	name="hypothetical protein"	PF13865.1|FoP_duplication[C-terminal duplication domain of Friend of PRMT1]	.	GO:0000166	ko03040[Spliceosome];ko03015[mRNA surveillance pathway]	.
scaffold00008	145865	T	TG	UPSTREAM	MODIFIER	B9J08_001590	C1_11670W_A	.	name="hypothetical protein"	PF08611.5|DUF1774[Fungal protein of unknown function (DUF1774)]	.	GO:0016021	.	TMH:7
scaffold00007	167264	G	GC	UPSTREAM	MODIFIER	B9J08_004151	C1_13120C_A	MON2	name="hypothetical protein"	PF12783.2|Sec7_N[Guanine nucleotide exchange factor in Golgi transport N-terminal]	.	GO:0006895;GO:0019898;GO:0043547;GO:0005085;GO:0005802;GO:0031901;GO:0006623;GO:0005829;GO:0006897	.	.
scaffold00010	194389	CT	C	UPSTREAM	MODIFIER	B9J08_002034	C1_13220C_A	AKR1	name="hypothetical protein"	PF13857.1|Ank_5[Ankyrin repeats (many copies)];PF13606.1|Ank_3[Ankyrin repeat];PF01529.15|zf-DHHC[DHHC palmitoyltransferase];PF12796.2|Ank_2[Ankyrin repeats (3 copies)];PF13637.1|Ank_4[Ankyrin repeats (many copies)];PF00023.25|Ank[Ankyrin repeat]	.	GO:0098588;EC:2.3.1.225;GO:0019706;GO:0044446;GO:0005768;GO:0005794;GO:0016021;GO:0008270	.	TMH:6
scaffold00006	422191	GA	G	UPSTREAM	MODIFIER	B9J08_004640	C1_13940W_A	SIM1	name="hypothetical protein"	PF03856.8|SUN[Beta-glucosidase (SUN family)]	.	GO:0044464	.	.
scaffold00008	240930	AT	A	UPSTREAM	MODIFIER	B9J08_001640	C2_00240C_A	SOD6	name="hypothetical protein"	PF00080.15|Sod_Cu[Copper/zinc superoxide dismutase (SODC)]	.	GO:0006801;GO:0016209;GO:0031224;GO:0046872;GO:0098869;GO:0055114;GO:0016491	.	TMH:1
scaffold00002	153748	AT	A	UPSTREAM	MODIFIER	B9J08_004961	C2_03050W_A	SHE9	name="hypothetical protein"	PF05546.6|She9_MDM33[She9 / Mdm33 family]	.	GO:0007007;GO:0016021;GO:0005743	.	TMH:2
scaffold00003	24456	CT	C	UPSTREAM	MODIFIER	B9J08_000512	C2_03170W_A	.	name="hypothetical protein"	PF13279.1|4HBT_2[Thioesterase-like superfamily]	.	GO:0005783;GO:0016021	.	TMH:1
scaffold00002	249751	AT	A	UPSTREAM	MODIFIER	B9J08_005010	C2_05340C_A	RPC40	name="DNA-directed RNA polymerase I and III subunit RPAC1"	PF01000.21|RNA_pol_A_bac[RNA polymerase Rpb3/RpoA insert domain];PF01193.19|RNA_pol_L[RNA polymerase Rpb3/Rpb11 dimerisation domain]	.	GO:0003677;GO:0006360;GO:0001054;GO:0005666;GO:0046983;GO:0005829;GO:0001056;GO:0042797;GO:0005736	ko04623[Cytosolic DNA-sensing pathway];ko00240[Pyrimidine metabolism];ko03020[RNA polymerase]	.
scaffold00003	823795	T	TC	UPSTREAM	MODIFIER	B9J08_000883	C2_05750W_A	.	name="hypothetical protein"	PF07767.6|Nop53[Nop53 (60S ribosomal biogenesis)]	.	GO:0000055;GO:0005730;GO:0000463;GO:0019843	.	.
scaffold00005	192446	A	AG	UPSTREAM	MODIFIER	B9J08_001151	C2_07600C_A	MSC7	name="hypothetical protein"	PF00171.17|Aldedh[Aldehyde dehydrogenase family]	.	GO:0008886;GO:0007131;EC:1.2.1.39;EC:1.2.1.9;GO:0008957;GO:0016021;GO:0055114	.	TMH:2
scaffold00007	82443	GA	G	UPSTREAM	MODIFIER	B9J08_004129	C2_08000C_A	KRE30	name="ABC transporter ATP-binding protein ARB1"	PF00005.22|ABC_tran[ABC transporter];PF12848.2|ABC_tran_2[ABC transporter]	.	GO:0005840;GO:0005634;GO:0035690;GO:0005524;GO:0000056;GO:0042624	.	.
scaffold00005	1018832	CTT	C	UPSTREAM	MODIFIER	B9J08_001519	C2_08050C_A	SIT1	name="hypothetical protein"	PF07690.11|MFS_1[Major Facilitator Superfamily]	.	GO:0016021	.	TMH:12
scaffold00005	1020072	GA	G	UPSTREAM	MODIFIER	B9J08_001519	C2_08050C_A	SIT1	name="hypothetical protein"	PF07690.11|MFS_1[Major Facilitator Superfamily]	.	GO:0016021	.	TMH:12
scaffold00003	759942	GA	G	UPSTREAM	MODIFIER	B9J08_000850	C2_08100W_A	.	name="hypothetical protein"	PF00070.22|Pyr_redox[Pyridine nucleotide-disulphide oxidoreductase];PF07992.9|Pyr_redox_2[Pyridine nucleotide-disulphide oxidoreductase]	.	GO:0055114;GO:0016491	.	.
scaffold00002	390780	CT	C	UPSTREAM	MODIFIER	B9J08_005073	C2_08270C_A	.	name="hypothetical protein"	PF00069.20|Pkinase[Protein kinase domain];PF07714.12|Pkinase_Tyr[Protein tyrosine kinase]	EC:2.7.11.1[Non-specific serine/threonine protein kinase.]	GO:0005634;GO:0000329;GO:0005524;GO:0004674;EC:2.7.11;GO:0006468;GO:0005886;GO:0016192	ko04711[Circadian rhythm - fly];ko04340[Hedgehog signaling pathway]	.
scaffold00009	424323	GA	G	UPSTREAM	MODIFIER	B9J08_002424	C2_09020W_A	CDC47	name="hypothetical protein"	PF01078.16|Mg_chelatase[Magnesium chelatase, subunit ChlI];PF00493.18|MCM[MCM2/3/5 family];PF07728.9|AAA_5[AAA domain (dynein-related subfamily)];PF14551.1|MCM_N[MCM N-terminal domain]	.	GO:0003688;GO:0000781;GO:0005524;GO:0006268;GO:1990518;GO:0005737;GO:0033679;GO:0006357;GO:0003697;GO:0031298;GO:0009378;GO:0003682;GO:0005656;GO:0042555;GO:0003712;GO:0003727;GO:0030466;GO:0000727;GO:0003724;GO:0006270;GO:0006348;GO:0006271;GO:0000790;GO:0031261;GO:0006267;GO:0097373	ko04113[Meiosis - yeast];ko04111[Cell cycle - yeast];ko04110[Cell cycle]	.
scaffold00001	2048719	T	TG	UPSTREAM	MODIFIER	B9J08_003586	C2_10570W_A	SGS1	name="hypothetical protein"	PF00271.26|Helicase_C[Helicase conserved C-terminal domain];PF00570.18|HRDC[HRDC domain];PF11408.3|Helicase_Sgs1[Sgs1 RecQ helicase];PF00270.24|DEAD[DEAD/DEAH box helicase];PF09382.5|RQC[RQC domain]	EC:3.6.4.12[DNA helicase.]	GO:0071140;GO:0005524;GO:0031860;GO:0006268;GO:0000706;GO:0043007;GO:0031573;GO:0000070;GO:0005730;GO:0006265;GO:0031292;GO:0006301;GO:0000722;GO:1903221;GO:0003676;GO:0010947;GO:0000228;GO:0001302;GO:0044182;GO:0043140;GO:0000724;GO:1990426;GO:0031422;GO:0070914;GO:0045132	.	.
scaffold00008	449929	CA	C	UPSTREAM	MODIFIER	B9J08_001739	C3_01990W_A	RNA1	name="hypothetical protein"	PF13516.1|LRR_6[Leucine Rich repeat]	.	GO:0000781;GO:0043547;GO:0030702;GO:0000070;GO:0005829;GO:0006404;GO:0046827;GO:0031965;GO:0000054;GO:0006407;GO:0006409;GO:0000775;GO:0006348;GO:0006606;GO:0051383;GO:0005096	.	.
scaffold00001	2955916	AT	A	UPSTREAM	MODIFIER	B9J08_003997	C3_03270W_A	.	name="hypothetical protein"	PF07047.7|OPA3[Optic atrophy 3 protein (OPA3)]	.	GO:0016021;GO:0005737	.	.
scaffold00002	956631	T	TC	DOWNSTREAM	MODIFIER	B9J08_005335	C3_03870C_A	SAP9	name="hypothetical protein"	PF00026.18|Asp[Eukaryotic aspartyl protease]	.	EC:3.4.23;GO:0006508;GO:0031505;GO:0004190	.	.
scaffold00004	945932	CA	C	UPSTREAM	MODIFIER	B9J08_000446	C3_04000C_A	CTN3	name="hypothetical protein"	PF00755.15|Carn_acyltransf[Choline/Carnitine o-acyltransferase]	.	GO:0016746	.	.
scaffold00001	2868633	T	TC	UPSTREAM	MODIFIER	B9J08_003954	C3_04490W_A	RAX1	name="hypothetical protein"	PF00615.14|RGS[Regulator of G protein signaling domain]	.	GO:0000282;GO:0016021;GO:0005935	.	TMH:3
scaffold00004	353576	GT	G	UPSTREAM	MODIFIER	B9J08_000164	C3_05220W_A	CDR1	name="multidrug resistance protein CDR1"	PF03193.11|DUF258[Protein of unknown function, DUF258];PF00005.22|ABC_tran[ABC transporter];PF01061.19|ABC2_membrane[ABC-2 type transporter];PF06422.7|PDR_CDR[CDR ABC transporter];PF14510.1|ABC_trans_N[ABC-transporter extracellular N-terminal]	.	GO:0035690;GO:0005524;GO:0046677;GO:0046618;EC:3.6.3.44;GO:0046898;GO:0016021;GO:0008559;GO:0005886;GO:0042908;GO:0006855	.	TMH:12
scaffold00001	678879	G	GC	UPSTREAM	MODIFIER	B9J08_002900	C3_06700C_A	.	name="hypothetical protein"	.	.	.	.	.
scaffold00005	360039	GA	G	UPSTREAM	MODIFIER	B9J08_001232	C3_06850W_A	FCR1	name="hypothetical protein"	PF00172.13|Zn_clus[Fungal Zn(2)-Cys(6) binuclear cluster domain]	.	GO:0006357;GO:0000981;GO:0005634;GO:0008270	.	.
scaffold00008	474307	CA	C	UPSTREAM	MODIFIER	B9J08_001748	C3_07560W_A	TCC1	name="hypothetical protein"	PF00515.23|TPR_1[Tetratricopeptide repeat];PF13181.1|TPR_8[Tetratricopeptide repeat];PF14559.1|TPR_19[Tetratricopeptide repeat];PF07719.12|TPR_2[Tetratricopeptide repeat]	.	GO:0000122;GO:0005634;GO:0071467;GO:0009405;GO:0036177	.	.
scaffold00001	1936555	C	CG	UPSTREAM	MODIFIER	B9J08_003531	C4_00650W_A	HIS5	name="histidinol-phosphate transaminase"	PF00155.16|Aminotran_1_2[Aminotransferase class I and II];TIGR01141[hisC: histidinol-phosphate transaminase]	EC:2.6.1.9[Histidinol-phosphate transaminase.]	GO:0000105;GO:0004400;EC:2.6.1.9;GO:0030170	ko00401[Novobiocin biosynthesis];ko00350[Tyrosine metabolism];ko00360[Phenylalanine metabolism];ko00400[Phenylalanine, tyrosine and tryptophan biosynthesis];ko00960[Tropane, piperidine and pyridine alkaloid biosynthesis]	.
scaffold00010	268308	T	TC	UPSTREAM	MODIFIER	B9J08_002067	C4_01100C_A	AGP2	name="hypothetical protein"	PF00324.16|AA_permease[Amino acid permease];PF13520.1|AA_permease_2[Amino acid permease]	.	GO:1902269;GO:1902603;GO:1902047;GO:0000329;GO:0015226;GO:0006970;GO:1902274;GO:0015203;GO:0005887;GO:0006631;GO:0003333;GO:0005789;GO:0015171	.	TMH:12
scaffold00003	558302	G	GC	UPSTREAM	MODIFIER	B9J08_000762	C4_01910W_A	.	name="hypothetical protein"	PF09734.4|Tau95[RNA polymerase III transcription factor (TF)IIIC subunit]	.	GO:0001041;GO:0006359;GO:0043035;GO:0005829;GO:0000127;GO:0000995;GO:0001021;GO:0000999	.	.
scaffold00005	769475	CA	C	UPSTREAM	MODIFIER	B9J08_001415	C4_02960W_A	.	name="hypothetical protein"	.	EC:6.3.2.19[Ubiquitin--protein ligase.]	GO:0008270	.	.
scaffold00004	613595	T	TG	UPSTREAM	MODIFIER	B9J08_000296	C4_04290W_A	SEC15	name="hypothetical protein"	PF04091.7|Sec15[Exocyst complex subunit Sec15-like]	.	GO:0000145;GO:0006904;GO:0005934;GO:0000131;GO:0017137;GO:0005935;GO:0006893	.	.
scaffold00008	488227	CT	C	UPSTREAM	MODIFIER	B9J08_001757	C4_04570W_A	RCE1	name="hypothetical protein"	PF02517.11|Abi[CAAX protease self-immunity]	EC:3.4.22.-[Cysteine endopeptidases.]	GO:0019538	.	TMH:5
scaffold00001	633563	GA	G	UPSTREAM	MODIFIER	B9J08_002877	C4_06130W_A	.	name="hypothetical protein"	PF12814.2|Mcp5_PH[Meiotic cell cortex C-terminal pleckstrin homology]	.	GO:0000226;GO:0005783;GO:0005938;GO:0005934;GO:0030473;GO:0005543;GO:0015631;GO:0000001;GO:0032065;GO:0005739;GO:0000266	.	.
scaffold00006	722992	CT	C	UPSTREAM	MODIFIER	B9J08_004783	C4_06420W_A	.	name="hypothetical protein"	.	.	GO:0031505	.	.
scaffold00005	539440	TA	T	UPSTREAM	MODIFIER	B9J08_001307	C5_00330C_A	.	name="hypothetical protein"	.	.	GO:0051604;GO:0016021;GO:0005739;GO:0006113	.	TMH:1
scaffold00005	584201	AT	A	UPSTREAM	MODIFIER	B9J08_001330	C5_00770C_A	FOL1	name="dihydropteroate synthase"	TIGR01498[folK: 2-amino-4-hydroxy-6-hydroxymethyldihydropteridine diphosphokinase];PF01288.15|HPPK[7,8-dihydro-6-hydroxymethylpterin-pyrophosphokinase (HPPK)];PF00809.17|Pterin_bind[Pterin binding enzyme];PF02152.13|FolB[Dihydroneopterin aldolase];TIGR01496[DHPS: dihydropteroate synthase]	EC:2.7.6.3[2-amino-4-hydroxy-6-hydroxymethyldihydropteridine diphosphokinase.];EC:4.1.2.25[Dihydroneopterin aldolase.];EC:2.5.1.15[Dihydropteroate synthase.]	GO:0005740;EC:2.7.6.3;EC:4.1.2.25;EC:2.5.1.15;GO:0005488;GO:0009396;GO:0003848;GO:0004150;GO:0004156	.	.
scaffold00001	3115369	GT	G	UPSTREAM	MODIFIER	B9J08_004069	C5_03100C_A	.	name="hypothetical protein"	PF10309.4|DUF2414[Protein of unknown function (DUF2414)]	.	GO:0003729;GO:0000166;GO:0000340	.	.
scaffold00001	3108815	GA	G	UPSTREAM	MODIFIER	B9J08_004071	C5_03120W_A	.	name="hypothetical protein"	PF06728.8|PIG-U[GPI transamidase subunit PIG-U]	.	GO:0006506;GO:0005783;GO:0016021	.	TMH:7
scaffold00005	1047454	GTGT	G	UPSTREAM	MODIFIER	B9J08_001529	C5_05360C_A	.	name="hypothetical protein"	PF00150.13|Cellulase[Cellulase (glycosyl hydrolase family 5)]	.	GO:0004553;GO:0005975	.	.
scaffold00008	320563	GA	G	UPSTREAM	MODIFIER	B9J08_001678	C6_00290W_A	.	name="hypothetical protein"	.	.	.	.	.
scaffold00008	576879	A	AG	UPSTREAM	MODIFIER	B9J08_001796	C6_01040C_A	.	name="hypothetical protein"	PF00271.26|Helicase_C[Helicase conserved C-terminal domain];PF04408.18|HA2[Helicase associated domain (HA2)];PF00270.24|DEAD[DEAD/DEAH box helicase];PF07717.11|OB_NTP_bind[Oligonucleotide/oligosaccharide-binding (OB)-fold]	EC:3.6.4.13[RNA helicase.]	GO:0000462;GO:0005524;GO:0005730;GO:0003724;GO:0008026;GO:0003676	.	.
scaffold00001	2253786	TA	T	UPSTREAM	MODIFIER	B9J08_003680	C6_02050W_A	DBR1	name="hypothetical protein"	PF05011.8|DBR1[Lariat debranching enzyme, C-terminal domain]	.	GO:0007124;GO:0006401;GO:0032197;GO:0008419;GO:0090502;GO:0045292;GO:0016074	.	.
scaffold00001	2214511	TA	T	UPSTREAM	MODIFIER	B9J08_003660	C6_03940C_A	PBP2	name="hypothetical protein"	PF00013.24|KH_1[KH domain];PF13014.1|KH_3[KH domain]	.	GO:0003729;GO:0005634;GO:0005737	.	.
scaffold00002	1153113	T	TG	UPSTREAM	MODIFIER	B9J08_005419	C7_00830C_A	.	name="hypothetical protein"	.	.	.	.	.
scaffold00003	453918	T	TG	UPSTREAM	MODIFIER	B9J08_000714	C7_01030C_A	.	name="hypothetical protein"	PF08161.7|NUC173[NUC173 domain]	.	GO:0005634;GO:0044732	.	.
scaffold00003	509189	CA	C	UPSTREAM	MODIFIER	B9J08_000737	C7_02970W_A	ECM39	name="hypothetical protein"	PF03901.12|Glyco_transf_22[Alg9-like mannosyltransferase family]	EC:2.4.1.260[Dol-P-Man:Man(7)GlcNAc(2)-PP-Dol alpha-1,6-mannosyltransferase.]	GO:0097502;GO:0000009;GO:0006486;GO:0005783;GO:0016021;GO:0006488	ko00513[Various types of N-glycan biosynthesis]	TMH:6
scaffold00006	184248	T	TG	UPSTREAM	MODIFIER	B9J08_004543	C7_03040W_A	.	name="hypothetical protein"	PF04387.9|PTPLA[Protein tyrosine phosphatase-like protein, PTPLA]	.	GO:0016021	.	TMH:4
scaffold00001	244685	G	GC	DOWNSTREAM	MODIFIER	B9J08_002686	C7_03220C_A	ZCF29	name="hypothetical protein"	.	.	.	.	.
scaffold00001	289770	AT	A	UPSTREAM	MODIFIER	B9J08_002710	C7_03220C_A	ZCF29	name="hypothetical protein"	PF04082.13|Fungal_trans[Fungal specific transcription factor domain];PF00172.13|Zn_clus[Fungal Zn(2)-Cys(6) binuclear cluster domain]	.	GO:0003677;GO:0005634;GO:0008270;GO:0006351	.	.
scaffold00002	1174861	GA	G	UPSTREAM	MODIFIER	B9J08_005427	C7_04200C_A	.	name="hypothetical protein"	PF08389.7|Xpo1[Exportin 1-like protein]	.	GO:0003723;GO:0008536;GO:0006388;GO:0005829;GO:0005635;GO:0071528;GO:0016363;GO:0005739	.	.
scaffold00001	3146428	CA	C	DOWNSTREAM	MODIFIER	B9J08_004089	CR_02640W_A	RFG1	name="hypothetical protein"	PF00505.14|HMG_box[HMG (high mobility group) box];PF09011.5|HMG_box_2[HMG-box domain]	.	GO:0097201;GO:0000987;GO:0008301;GO:0001135;GO:0006366;GO:0001078	.	.
scaffold00001	3149051	T	TG	UPSTREAM	MODIFIER	B9J08_004089	CR_02640W_A	RFG1	name="hypothetical protein"	PF00505.14|HMG_box[HMG (high mobility group) box];PF09011.5|HMG_box_2[HMG-box domain]	.	GO:0097201;GO:0000987;GO:0008301;GO:0001135;GO:0006366;GO:0001078	.	.
scaffold00002	224615	CA	C	UPSTREAM	MODIFIER	B9J08_004993	CR_03170W_A	DPS1-1	name="aspartate-tRNA ligase%2C cytoplasmic"	TIGR00458[aspS_nondisc: aspartate--tRNA(Asn) ligase];PF00152.15|tRNA-synt_2[tRNA synthetases class II (D, K and N)];PF01336.20|tRNA_anti-codon[OB-fold nucleic acid binding domain]	EC:6.1.1.12[Aspartate--tRNA ligase.]	GO:0006422;GO:0003723;GO:0005634;GO:0005524;EC:6.1.1.12;GO:0005829;GO:0004815	.	.
scaffold00001	1682237	T	A	UPSTREAM	MODIFIER	B9J08_003412	CR_03910C_A	TAF12L	name="hypothetical protein"	PF03847.8|TFIID_20kDa[Transcription initiation factor TFIID subunit A]	.	GO:0000124;GO:0032947;GO:0042802;GO:0046982;GO:0046695;GO:0016573;GO:0005669;GO:0003682;GO:0017025;GO:0001102;GO:0051123	.	.
scaffold00001	2936137	A	ATTCCCAAACGCTACAG	UPSTREAM	MODIFIER	B9J08_003986	CR_06520C_A	.	name="hypothetical protein"	PF09439.5|SRPRB[Signal recognition particle receptor beta subunit];PF08477.8|Miro[Miro-like protein];PF00025.16|Arf[ADP-ribosylation factor family];PF00071.17|Ras[Ras family]	.	GO:0007264;GO:0005829;GO:0005794;GO:0042147;GO:0005525;GO:0005801;GO:0003924	.	.
scaffold00002	520926	GT	G	UPSTREAM	MODIFIER	B9J08_005132	CR_06720W_A	NMD3	name="60S ribosomal export protein NMD3"	PF04981.8|NMD3[NMD3 family]	.	GO:0000055;GO:0005634;GO:0043023;GO:0022625	ko03013[RNA transport]	.
scaffold00003	1048642	T	TG	UPSTREAM	MODIFIER	B9J08_000976	CR_07400C_A	LPD1	name="dihydrolipoyl dehydrogenase"	PF02852.17|Pyr_redox_dim[Pyridine nucleotide-disulphide oxidoreductase, dimerisation domain];PF00070.22|Pyr_redox[Pyridine nucleotide-disulphide oxidoreductase];PF01134.17|GIDA[Glucose inhibited division protein A];TIGR01350[lipoamide_DH: dihydrolipoyl dehydrogenase];PF07992.9|Pyr_redox_2[Pyridine nucleotide-disulphide oxidoreductase]	EC:1.8.1.4[Dihydrolipoyl dehydrogenase.]	EC:1.8.1.4;GO:0009353;GO:0004148;GO:0005960;GO:0042645;GO:0050660;GO:0055114;GO:0045454;GO:0006574;EC:1.4.4.2;GO:0006564;GO:0036180;GO:0006090;GO:0006546;GO:0042743;EC:1.2.4.2;GO:0004375;GO:0006552;GO:0004738;GO:0006103;GO:0004591;GO:0005967;GO:0006550	ko00020[Citrate cycle (TCA cycle)];ko00260[Glycine, serine and threonine metabolism];ko00280[Valine, leucine and isoleucine degradation];ko00620[Pyruvate metabolism]	.
scaffold00002	1366185	A	AC	UPSTREAM	MODIFIER	B9J08_005518	CR_09010C_A	.	name="hypothetical protein"	PF01053.15|Cys_Met_Meta_PP[Cys/Met metabolism PLP-dependent enzyme]	EC:2.5.1.48[Cystathionine gamma-synthase.]	GO:0005634;GO:0003824;GO:0030170;GO:0005737	ko00450[Selenocompound metabolism];ko00920[Sulfur metabolism]	.
scaffold00001	366538	T	TC	UPSTREAM	MODIFIER	B9J08_002752	CR_10000C_A	.	name="hypothetical protein"	PF01035.15|DNA_binding_1[6-O-methylguanine DNA methyltransferase, DNA binding domain]	.	GO:0006281;GO:0003824	.	.
scaffold00003	80669	CA	C	UPSTREAM	MODIFIER	B9J08_000534	CR_10440W_A	.	name="hypothetical protein"	.	.	GO:0090618;GO:0005634;GO:0031391;GO:0003682;GO:0006261;GO:0005739;GO:0000724;GO:0010526;GO:0007064	.	.
scaffold00005	416273	CA	C	UPSTREAM	MODIFIER	B9J08_001261	CR_10730C_A	.	name="hypothetical protein"	PF04818.8|CTD_bind[RNA polymerase II-binding domain.]	.	GO:0005634;GO:0005829;GO:0031139	.	.
scaffold00008	828545	CT	C	UPSTREAM	MODIFIER	B9J08_001920T0	.	.	name="hypothetical protein"	PF04082.13|Fungal_trans[Fungal specific transcription factor domain];PF00172.13|Zn_clus[Fungal Zn	2)-Cys	6) binuclear cluster domain]	.	.
scaffold00009	758698	AT	A	UPSTREAM	MODIFIER	B9J08_002575T0	C7_00170W_A	VPS70	name="hypothetical protein"	PF02225.17|PA[PA domain];PF04389.12|Peptidase_M28[Peptidase family M28];PF04253.10|TFR_dimer[Transferrin receptor-like dimerisation domain]	EC:3.4.17.21[Glutamate carboxypeptidase II.]	GO:0016787;GO:0016021	.	TMH:1
scaffold00001	14631	A	ATG	UPSTREAM	MODIFIER	B9J08_002593T0	.	.	name="hypothetical protein"	.	.	.	.	.
scaffold00001	227442	CA	C	UPSTREAM	MODIFIER	B9J08_002678T0	CR_00090C_A	.	name="hypothetical protein"	PF13460.1|NAD_binding_10[NADH	P)-binding];PF01073.14|3Beta_HSD[3-beta hydroxysteroid dehydrogenase/isomerase family];PF01118.19|Semialdhyde_dh[Semialdehyde dehydrogenase, NAD binding domain];PF05368.8|NmrA[NmrA-like family];PF01370.16|Epimerase[NAD dependent epimerase/dehydratase family]	.	.	.
scaffold00001	253901	GAA	G	UPSTREAM	MODIFIER	B9J08_002690T0	.	.	name="hypothetical protein"	PF14031.1|D-ser_dehydrat[Putative serine dehydratase domain];PF01168.15|Ala_racemase_N[Alanine racemase, N-terminal domain]	.	GO:0005634;GO:0005829	.		.
scaffold00001	1186311	A	T	UPSTREAM	MODIFIER	B9J08_003178T0	C2_05850C_A	.	name="hypothetical protein"	PF06419.6|COG6[Conserved oligomeric complex COG6]	.	GO:0032258;GO:0017119;GO:0006891	.	.	.
scaffold00001	1363848	AT	A	UPSTREAM	MODIFIER	B9J08_003262T0	C1_02870W_A	YPT7	name="hypothetical protein"	PF08477.8|Miro[Miro-like protein];PF00009.22|GTP_EFTU[Elongation factor Tu GTP binding domain];PF00025.16|Arf[ADP-ribosylation factor family];PF00071.17|Ras[Ras family]	.	GO:0007264;GO:0005622;GO:0005525	.	.
scaffold00001	1475082	AT	A	UPSTREAM	MODIFIER	B9J08_003309T0	C3_01350C_A	URA3	name="orotidine 5'-phosphate decarboxylase"	PF00215.19|OMPdecase[Orotidine 5'-phosphate decarboxylase / HUMPS family];TIGR01740[pyrF: orotidine 5'-phosphate decarboxylase]	EC:4.1.1.23[Orotidine-5'-phosphate decarboxylase.]	GO:0016477;GO:0046109;GO:0004590;EC:4.1.1.23;GO:0046107;GO:0044406;GO:0044205;GO:0005829;GO:0097311;GO:0044182;GO:0006207;GO:0009405	.	.
scaffold00001	2141878	C	CT	UPSTREAM	MODIFIER	B9J08_003622T0	C2_04080W_A	.	name="hypothetical protein"	.	.	.	.	.	.
scaffold00001	2763271	CT	C	UPSTREAM	MODIFIER	B9J08_003910T0	C2_08870C_A	PIR1	name="hypothetical protein"	PF00399.14|PIR[Yeast PIR protein repeat]	.	GO:0005199;GO:0009986;GO:0005618	.	.
scaffold00001	2874586	CT	C	UPSTREAM	MODIFIER	B9J08_003957T0	C3_04610W_A	MEA1	name="hypothetical protein"	PF09794.4|Avl9[Transport protein Avl9];PF07792.7|Afi1[Docking domain of Afi1 for Arf3 in vesicle trafficking];PF08616.5|SPA[Stabilization of polarity axis]	.	GO:0005634;GO:0005829	.	.
scaffold00001	2927192	GA	G	UPSTREAM	MODIFIER	B9J08_003982T0	CR_07200W_A	.	name="hypothetical protein"	PF07896.7|DUF1674[Protein of unknown function	DUF1674)];PF02636.12|Methyltransf_28[Putative S-adenosyl-L-methionine-dependent methyltransferase]	.	.
scaffold00001	3127950	T	TTTTTTTTTTTTTTTTTTTTTTTTTTTTGTTTTTTTTTTTTTTTTTTTTTTTTTTTTTTTTTA	UPSTREAM	MODIFIER	B9J08_004081T0	CR_02720C_A	RPC31	name="hypothetical protein"	PF11705.3|RNA_pol_3_Rpc31[DNA-directed RNA polymerase III subunit Rpc31]	.	GO:0006359;GO:0016779;GO:0042797;GO:0006384;GO:0005666	ko04623[Cytosolic DNA-sensing pathway];ko00240[Pyrimidine metabolism];ko03020[RNA polymerase]	.
scaffold00001	3128147	T	TTC	UPSTREAM	MODIFIER	B9J08_004081T0	CR_02720C_A	RPC31	name="hypothetical protein"	PF11705.3|RNA_pol_3_Rpc31[DNA-directed RNA polymerase III subunit Rpc31]	.	GO:0006359;GO:0016779;GO:0042797;GO:0006384;GO:0005666	ko04623[Cytosolic DNA-sensing pathway];ko00240[Pyrimidine metabolism];ko03020[RNA polymerase]	.
scaffold00001	3174079	A	G	UPSTREAM	MODIFIER	B9J08_004097T0	C2_08050C_A	SIT1	name="hypothetical protein"	PF07690.11|MFS_1[Major Facilitator Superfamily]	.	GO:0055085;GO:0016021	.	TMH:14
scaffold00007	330001	CA	C	UPSTREAM	MODIFIER	B9J08_004223T0	.	.	name="hypothetical protein"	PF13233.1|Complex1_LYR_2[Complex1_LYR-like]	.	GO:0005759;GO:0033615	.	.
scaffold00006	259249	A	G	UPSTREAM	MODIFIER	B9J08_004571T0	C1_05780W_A	.	name="hypothetical protein"	.	.	GO:0003677;GO:0061587;GO:0006337;GO:0006368;GO:0016586;GO:0005829;GO:0003682;GO:0043044;GO:0000086;GO:0009303;GO:0070301	.	.
scaffold00006	573769	GAA	G	UPSTREAM	MODIFIER	B9J08_004712T0	C4_03590C_B	OSH3	name="hypothetical protein"	PF15409.1|PH_8[Pleckstrin homology domain];PF01237.13|Oxysterol_BP[Oxysterol-binding protein]	.	GO:0015918;GO:0010922;GO:0007124;GO:0035621;GO:0008289;GO:0015248;GO:0001403;GO:0032541;GO:0016021;GO:0000742;GO:0006897;GO:0030011;GO:0006887	.	.
scaffold00006	968093	GA	G	UPSTREAM	MODIFIER	B9J08_004886T0	C5_01360W_A	CFL4	name="hypothetical protein"	PF08022.7|FAD_binding_8[FAD-binding domain];PF08030.7|NAD_binding_6[Ferric reductase NAD binding domain];PF01794.14|Ferric_reduct[Ferric reductase like transmembrane component]	.	.	.	TMH:7
scaffold00002	114205	A	AG	UPSTREAM	MODIFIER	B9J08_004942T0	.	.	name="hypothetical protein"	.	.	.	.	.
scaffold00003	1210313	C	CCA			B9J08_001051	.	.	name="hypothetical protein"	PF00627.26|UBA[UBA/TS-N domain]	.	.	.	.
scaffold00005	581146	T	TG			B9J08_001329	C5_01910W_A	GIS2	name="hypothetical protein"	PF13917.1|zf-CCHC_3[Zinc knuckle];PF00098.18|zf-CCHC[Zinc knuckle];PF14392.1|zf-CCHC_4[Zinc knuckle]	.	GO:0010494;GO:0003729;GO:0035690;GO:0042788;GO:0070417;GO:0045727;GO:0000932;GO:0071470;GO:0003697;GO:0008270;GO:0045182	.	.
scaffold00001	2936163	T	TG			B9J08_003986	CR_06520C_A	.	name="hypothetical protein"	PF09439.5|SRPRB[Signal recognition particle receptor beta subunit];PF08477.8|Miro[Miro-like protein];PF00025.16|Arf[ADP-ribosylation factor family];PF00071.17|Ras[Ras family]	.	GO:0007264;GO:0005829;GO:0005794;GO:0042147;GO:0005525;GO:0005801;GO:0003924	.	.
scaffold00001	2936168	C	CG			B9J08_003986	CR_06520C_A	.	name="hypothetical protein"	PF09439.5|SRPRB[Signal recognition particle receptor beta subunit];PF08477.8|Miro[Miro-like protein];PF00025.16|Arf[ADP-ribosylation factor family];PF00071.17|Ras[Ras family]	.	GO:0007264;GO:0005829;GO:0005794;GO:0042147;GO:0005525;GO:0005801;GO:0003924	.	.
scaffold00004	821308	CTGT	C			B9J08_000401T0	.	.	name="hypothetical protein"	.	.	GO:0050789	.	.
